# Supplementary material for: Identification of a Covalent Importin-5 Inhibitor, Goyazensolide, from a Collective Synthesis of Furanoheliangolides
Source: PubMed Central journal article supplement — ACS Cent Sci. 2021 May 25;7(6):954–62. doi: 10.1021/acscentsci.1c00056 (PMC8227592; doi:10.1021/acscentsci.1c00056), 2021-05-25
Supplement: oc1c00056_si_001.pdf [file oc1c00056_si_001.pdf]

# Identification of a covalent importin-5 inhibitor, goyazensolide from a collective synthesis of furanoheliangolides

Weilong Liu,<sup>#1</sup> Rémi Patouret,<sup>#1</sup> Sofia Barluenga,<sup>1</sup> Michael Plank,<sup>2</sup> Robbie Loewith,<sup>2</sup> Nicolas Winssinger<sup>1\*</sup>

1. Departement of Organic Chemistry, NCCR Chemical Biology, Faculty of Science, University of Geneva, 1205 Geneva, Switzerland
2. Departement of Molecular Biology, NCCR Chemical Biology, Faculty of Science, University of Geneva, 1205 Geneva, Switzerland

| Table of Contents                                                                                                                    |           |
|--------------------------------------------------------------------------------------------------------------------------------------|-----------|
| a) General information (Chemistry)                                                                                                   | S2        |
| b) Summary of synthesized natural products ( <b>Figure S1</b> ) and other structurally similar natural products ( <b>Figure S2</b> ) | S3-S6     |
| c) Structure revision of atripliciolide ( <b>2</b> ) ( <b>Table S1</b> )                                                             | S7-S8     |
| d) Structure elucidation of <b>13</b> ( <b>Figure S3</b> , <b>Table S2</b> )                                                         | S9-S10    |
| e) Data comparison and full analyses of <b>1</b> , <b>3-6</b> , <b>8-12</b> , <b>14-17</b> ( <b>Table S3-16</b> )                    | S11-S24   |
| f) Experimental procedures for <b>Scheme 1</b> ( <b>Figure S4-8</b> )                                                                | S25-S50   |
| g) Experimental procedures for <b>Scheme 2</b> ( <b>Figure S9-12</b> )                                                               | S51-S69   |
| h) Experimental procedures for <b>Figure 2</b> ( <b>Figure S13-17</b> , <b>Table S17</b> )                                           | S70-S77   |
| i) Experimental procedures for <b>Figure 3</b> ( <b>Figure S18-20</b> , <b>Table S18</b> )                                           | S78-S83   |
| j) Experimental procedures for <b>Figure 4</b> ( <b>Figure S 1-26</b> , <b>Table S19-21</b> )                                        | S84-S90   |
| k) Chiral-HPLC spectra of <b>20a</b>                                                                                                 | S91-S92   |
| l) <sup>1</sup> H and <sup>13</sup> C NMR spectra                                                                                    | S93-S234  |
| m) X-Ray data of <b>2</b> , <b>30</b> and <b>34</b>                                                                                  | S235-S250 |
| n) Abbreviation                                                                                                                      | S251-S252 |

## a) General information (Chemistry)

NMR spectra were recorded on AMX-300, AMX-400 and AMX-500 Bruker Avance spectrometers at 298 K with CDCl<sub>3</sub> as the solvent unless otherwise stated. Chemical shifts are reported in parts per million, relative to chloroform (<sup>1</sup>H, δ 7.26; <sup>13</sup>C, δ 77.16) unless otherwise stated. Data for <sup>1</sup>H NMR are reported as follows: chemical shift, integration, multiplicity (s = singlet, d = doublet, t = triplet, q = quartet, quint = quintuple, sept. = septuple, m = multiplet) and coupling constants. Infrared spectra (IR) were recorded on a Perkin-Elmer 1650 FT-IR spectrometer using neat samples on a diamond ATR Golden Gate sampler. High-resolution mass spectra (HRMS) were obtained on a Xevo G2 ToF spectrometer (Ionization mode: ESI positive polarity; Mobile phase: MeOH 100 μl/min). Optical rotations were recorded on OMNI Lab JASCO P-1030 polarimeter at 589 nm and are recorded as [α]<sub>D</sub><sup>T</sup> (concentration in grams/100 mL solvent). Analytical thin layer chromatography (TLC) was performed using 0.25 mm silica gel 60-F<sub>254</sub> plates from *Merck*, using 250nm UV light as the visualizing agent and a solution of phosphomolybdic acid or KMnO<sub>4</sub> and heat as developing agents. Flash chromatography was performed using 200-400 mesh silica gel. Yields refer to chromatographically and spectroscopically pure materials, unless otherwise stated. Reverse phase column chromatography was performed using Isolera Biotage using SNAP Cartridge KP-C18-HS of 60 g or 12 g. The X-ray diffraction data was collected on an Agilent Supernova diffractometer equipped with an ATLAS CCD detector using Cu radiation. The enantiomeric excess (*ee*) was determined by HPLC analysis. Chiral HPLC analysis was performed on Waters Acquity UPC2 with column OJ-H. All reagents were used as supplied by Aldrich, Fluka, Acros or Strem and used without purification unless otherwise noted. All reactions were carried out in oven-dried glassware under nitrogen atmosphere unless otherwise noted.

## Safety Statement

No unexpected or unusually high safety hazards were encountered.

**b) Summary of synthesized natural products (Figure S1) and other structurally similar natural products (Figure S2)**

**Figure S1. Isolation, structure and activity of compounds 1-17.**

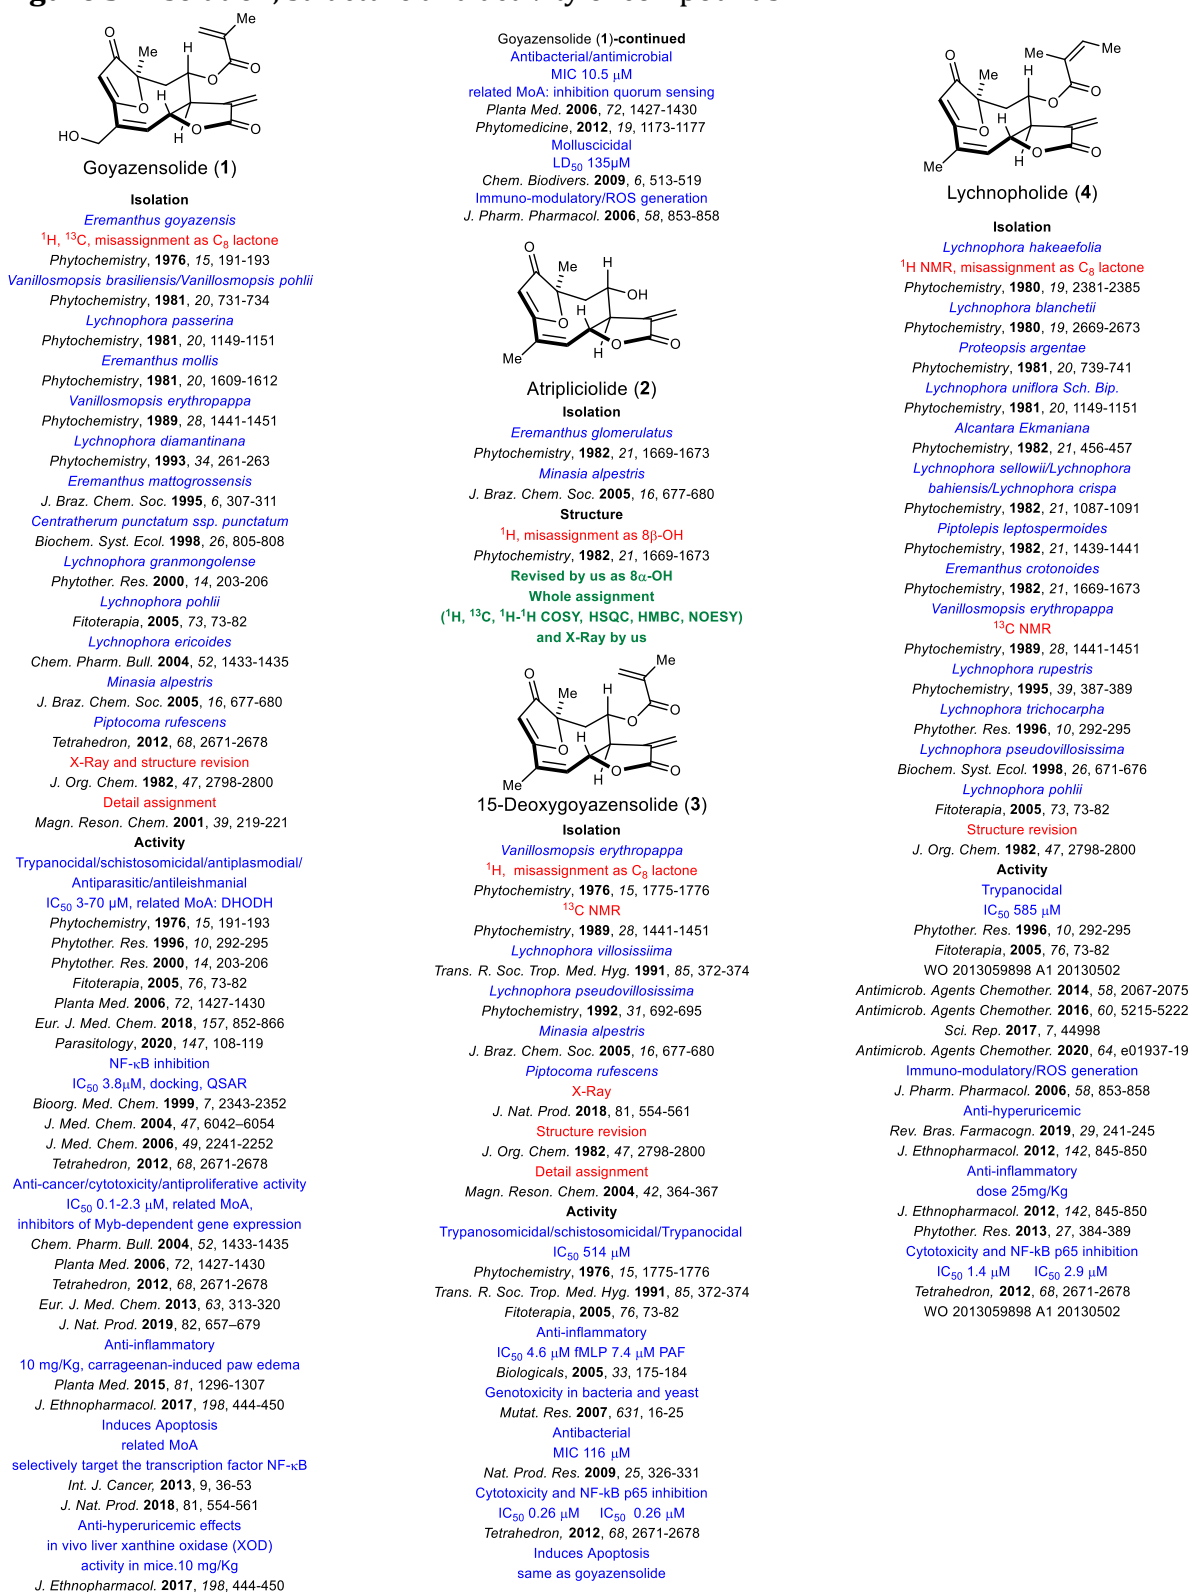

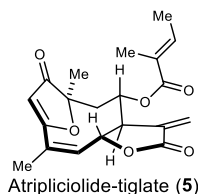

Atripliciolide-tiglate (5)

**Isolation**

*Eremanthus bicolor*  
<sup>1</sup>H NMR, misassignment as C<sub>8</sub> lactone  
*Phytochemistry*, **1980**, *19*, 2663-2668  
*Eremanthus crotonoides*  
*Phytochemistry*, **1982**, *21*, 1669-1673  
*Lychnophora crispata*  
*Phytochemistry*, **1982**, *21*, 1087-1091  
*Minasia alpestris*  
*J. Braz. Chem. Soc.* **2005**, *16*, 677-680

**Whole assignment by us**

(<sup>1</sup>H, <sup>13</sup>C, <sup>1</sup>H-<sup>1</sup>H COSY, HSQC, HMBC, NOESY)

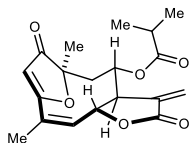

Atripliciolide-isobutyrate (6)

**Isolation**

*Eremanthus crotonoides*  
<sup>1</sup>H NMR, misassignment as C<sub>8</sub> lactone  
*Phytochemistry*, **1982**, *21*, 1669-1673  
*Minasia alpestris*  
*J. Braz. Chem. Soc.* **2005**, *16*, 677-680  
*Piptocoma rufescens*  
*Tetrahedron*, **2012**, *68*, 2671-2678

**Whole assignment by us**

(<sup>1</sup>H, <sup>13</sup>C, <sup>1</sup>H-<sup>1</sup>H COSY, HSQC, HMBC, NOESY)

**Activity**

Cytotoxicity  
 IC<sub>50</sub> 0.58 μM  
*Tetrahedron*, **2012**, *68*, 2671-2678

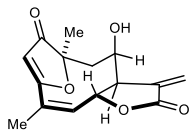

8-epi-Atripliciolide (7)

Original name: Atripliciolide

Revised in this manuscript as structure 2

Isolation has not been reported

**Whole assignment by us**

(<sup>1</sup>H, <sup>13</sup>C, <sup>1</sup>H-<sup>1</sup>H COSY, HSQC, HMBC, NOESY)

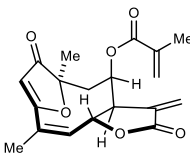

Calaxin (8)

Calaxin is also the name of a protein

**Isolation**

*Helianthus ciliaris* <sup>1</sup>H NMR  
*Rev. Latinoam. Quim.* **1970**, *1*, 81-85  
*Isocarpha atriplicifolia*, <sup>1</sup>H NMR  
*Phytochemistry*, **1978**, *17*, 471-474

Calaxin (8) - continued  
*Calea pilosa*  
*Phytochemistry*, **1981**, *20*, 743-749  
*Calea species*  
*Phytochemistry*, **1981**, *20*, 1643-1647  
*Sclerocarpus sessilifolius*  
*Biochem. Syst. Ecol.* **1991**, *19*, 523  
*Heliomeris obscura*  
*Phytochemistry*, **1997**, *46*, 969-972  
*Viguiera eriophora*  
*Phytochemistry*, **2000**, *55*, 255-261  
 C<sub>8</sub>-stereochemistry  
*J. Org. Chem.* **1980**, *45*, 4993-4997

**Whole assignment by us**

(<sup>1</sup>H, <sup>13</sup>C, <sup>1</sup>H-<sup>1</sup>H COSY, HSQC, HMBC, NOESY)

**Activity**

**Anti-fungal**

Pesticides, **1979**, *13*, 31-32  
 Pesticides, **1982**, *16*, 19-20  
 Pesticides, **1985**, *19*, 58-60

**Toxicity/cytotoxicity**

*Arch. Invest. Med.* **1980**, *11*, 435-443  
*Acta Hydrochim. Hydrobiol.* **1984**, *12*, 563-565  
*Acta Hydrochim. Hydrobiol.* **1985**, *13*, 391-394

**Anti cancer**

WO 2017079429 A1 20170511

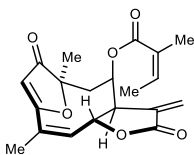

8-epi-Lychnopholide (15-deoxybudlein A, 9)

**Isolation**

*Calea pilosa* <sup>1</sup>H NMR  
*Phytochemistry*, **1981**, *20*, 743-749  
*Disynaphia halimifolia*  
*Phytochemistry*, **1981**, *20*, 1077-1080  
*Calea teucrifolia*  
*Phytochemistry*, **1981**, *20*, 1643-1647  
*Calea villosa*  
*Phytochemistry*, **1982**, *21*, 2593-2595  
*Calea angusta*  
*Phytochemistry*, **1982**, *21*, 2117-2118  
*Trichogoniopsis morii*  
*Phytochemistry*, **1982**, *21*, 2035-2040  
*Calea hymenolepis*  
*Phytochemistry*, **1982**, *21*, 2045-2048  
*Calea lantanoides* <sup>13</sup>C NMR  
*Phytochemistry*, **1982**, *21*, 464-465  
*Helianthus nuttallii*  
*J. Nat. Prod.* **1984**, *47*, 1021-1023  
*Calea divaricata*  
*J. Nat. Prod.* **1985**, *48*, 302-306  
*Helianthopsis bishopii*  
*Phytochemistry*, **1985**, *24*, 1108-1110  
*Viguiera sylvatica*  
*Phytochemistry*, **1989**, *28*, 2737-2740  
*Helianthus species (Asteraceae)*  
*Biochem. Syst. Ecol.* **1989**, *17*, 519-528  
*Helianthus stuebelii/sagasteguii*  
*Phytochemistry*, **1991**, *30*, 1861-1867  
*Sclerocarpus sessilifolius* <sup>13</sup>C  
*Biochem. Syst. Ecol.* **1991**, *19*, 523  
*Heliomeris obscura*  
*Phytochemistry*, **1997**, *46*, 969-972

**Activity**

NF-κB p65 inhibition  
 QSAR, IC<sub>100</sub> 2.5-5 μM  
*J. Med. Chem.* **2004**, *47*, 6042-6054  
*J. Med. Chem.* **2006**, *49*, 2241-2252

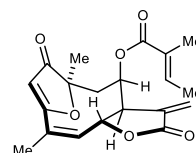

8-epi-Atripliciolide-tiglate (10)

**Isolation**

*Isocarpha atriplicifolia* <sup>1</sup>H NMR  
*Phytochemistry*, **1978**, *17*, 471-474  
*Calea pilosa/Calea morii*  
*Phytochemistry*, **1981**, *20*, 743-749  
*Bejaranoa semistriata*  
*Phytochemistry*, **1981**, *20*, 1639-1642  
*Chresta sphaerocephala*  
*Phytochemistry*, **1982**, *21*, 1669-1673  
*Calea angusta*  
*Phytochemistry*, **1982**, *21*, 2117-2118  
*Helianthus species*  
*Biochem. Syst. Ecol.* **1989**, *17*, 519-528  
*Helianthus sagasteguii*  
*Phytochemistry*, **1991**, *30*, 1861-1867  
*Viguiera species*  
*Fitoterapia*, **1998**, *69*, 86-87

**Whole assignment by us**

(<sup>1</sup>H, <sup>13</sup>C, <sup>1</sup>H-<sup>1</sup>H COSY, HSQC, HMBC, NOESY)

**Activity**

**Antibacterial activity**

*Fitoterapia*, **1998**, *69*, 86-87  
 NF-κB p65 inhibition  
 QSAR, IC<sub>100</sub> 5 μM  
*J. Med. Chem.* **2004**, *47*, 6042-6054  
*J. Med. Chem.* **2006**, *49*, 2241-2252  
 Antileishmanial  
 IC<sub>50</sub> 872 μM, related MoA: DHODH  
*Eur. J. Med. Chem.* **2018**, *157*, 852-866

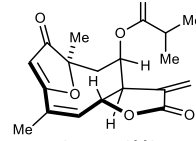

Ciliarin (11)

**Isolation**

*Helianthus ciliaris* <sup>1</sup>H NMR  
*Rev. Latinoam. Quim.* **1970**, *1*, 81-85  
*Isocarpha atriplicifolia* <sup>1</sup>H NMR  
*Phytochemistry*, **1978**, *17*, 471-474  
*Calea rupicola*  
*Phytochemistry*, **1986**, *25*, 1753-1754  
*Viguiera acutifolia/ Helianthus sagasteguii*  
*Phytochemistry*, **1991**, *30*, 1861-1867  
 C<sub>8</sub>-stereochemistry  
*J. Org. Chem.* **1980**, *45*, 4993-4997  
**Whole assignment by us**  
 (<sup>1</sup>H, <sup>13</sup>C, <sup>1</sup>H-<sup>1</sup>H COSY, HSQC, HMBC, NOESY)

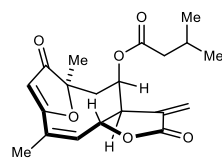

8-epi-Atripliciolide-isovalerate (12)

**Isolation**

*Isocarpha atriplicifolia* <sup>1</sup>H NMR  
*Phytochemistry*, **1978**, *17*, 471-474  
*Calea rupicola*  
*Phytochemistry*, **1986**, *25*, 1753-1754  
**Whole assignment by us**  
 (<sup>1</sup>H, <sup>13</sup>C, <sup>1</sup>H-<sup>1</sup>H COSY, HSQC, HMBC, NOESY)

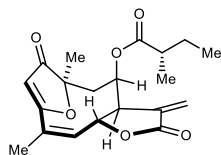

8-*epi*-Atripliciolide-2'-(*S*)-MeBu (**13**)

**Isolation**

*Helianthus lehmannii* <sup>1</sup>H NMR  
*Phytochemistry*, **1979**, *18*, 676  
*Calea angusta*  
*Phytochemistry*, **1982**, *21*, 2117-2118  
*Calea rupicola*  
*Phytochemistry*, **1986**, *25*, 1753-1754  
*Helianthus species*  
*Biochem. Syst. Ecol.* **1989**, *17*, 519-528  
*Helianthus stuebelii/sagasteguii*  
*Phytochemistry*, **1991**, *30*, 1861-1867  
**Structure elucidation-(S)-MeBu**  
**Whole assignment by us**  
(<sup>1</sup>H, <sup>13</sup>C, <sup>1</sup>H-<sup>13</sup>C COSY, HSQC, HMBC, NOESY)

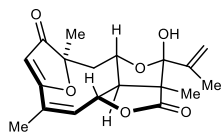

Eremantholide C (**14**)

**Isolation**

*Eremanthus elaeagnus* Schultz-Bip <sup>1</sup>H NMR  
*J. Chem. Soc., Perkin Trans. 1*, **1978**, 1572-1580  
*Eremanthus bicolor*  
*Phytochemistry*, **1980**, *19*, 2663-2668  
*Lychnophora uniflora*  
*Phytochemistry*, **1981**, *20*, 1149-1151  
*Lychnophora affinis* Gardn.  
*J. Org. Chem.* **1982**, *47*, 1519-1521  
*Piptolepis leptospermoides*  
*Phytochemistry*, **1982**, *21*, 1439-1441  
*Eremanthus crotonoides*  
*Phytochemistry*, **1982**, *21*, 1669-1673  
*Eremanthus glomerulatus*  
*Planta Med* **1985**, *51*, 38-39  
*Eremanthus goyazensis*  
*Phytochemistry*, **1989**, *28*, 1441-1451  
*Lychnophora rupestris*  
*Phytochemistry*, **1995**, *39*, 387-389  
*Lychnophora trichocarpa*  
*Phytother. Res.* **1996**, *10*, 292-295  
*Cunninghamella echinulata*  
*Fitoterapia*, **2000**, *71*, 60-64  
*Minasia alpestris*  
*J. Braz. Chem. Soc.* **2005**, *16*, 677-680  
<sup>1</sup>H and <sup>13</sup>C NMR  
*J. Org. Chem.* **2012**, *77*, 9374-9378  
**NMR assignment**  
*Magn. Reson. Chem.* **2008**, *46*, 576-581  
**Activity**  
**Anti-inflammatory**  
*J. Ethnopharmacol.* **2012**, *142*, 845-850  
*Phytother. Res.* **2013**, *27*, 384-389  
*Planta Med.* **2015**, *81*, 1296-1307  
*J. Pharm. Pharmacol.* **2019**, *71*, 910-919  
**Trypanocidal**  
*Phytother. Res.* **1996**, *10*, 292-295  
*Molecules*, **2013**, *18*, 7761-7847  
**Antifungal**  
*Fitoterapia*, **2000**, *71*, 60-64  
**Anti-hyperuricemic**  
*J. Ethnopharmacol.* **2012**, *142*, 845-850  
*Rev. Bras. Farmacogn.* **2019**, *29*, 241-245  
**Cytotoxicity**  
*J. Chem. Soc., Perkin Trans. 1*, **1978**, 1572-1580  
**Molluscicidal**  
*Planta Med.* **1985**, *51*, 38-39

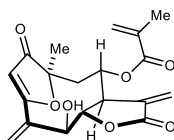

5-*epi*-Isogoyazensolide (**15**)

**Isolation**

*Vanillosmopsis brasiliensis/pohlii*  
<sup>1</sup>H NMR misassignment as C<sub>8</sub> lactone  
*Phytochemistry*, **1981**, *20*, 731-734  
*Eremanthus mattogrossensis*  
<sup>1</sup>H <sup>13</sup>C NMR, structure revision  
*J. Braz. Chem. Soc.* **1995**, *6*, 307-311  
*Camchaya calcarea*  
*Planta Med.* **2006**, *72*, 1427-1430  
*Piptocoma rufescens*  
*Tetrahedron*, **2012**, *68*, 2671-2678  
*Piptocoma antillana*  
*Nat. Prod. Commun.* **2014**, *9*, 1403-1406  
**Activity**  
**Antiplasmodial, Antimycobacterial, and Cytotoxic**  
*Planta Med.* **2006**, *72*, 1427-1430  
**Cytotoxic and NF-κB inhibitory**  
*Tetrahedron*, **2012**, *68*, 2671-2678  
**Antiproliferative and antimalarial**  
*Nat. Prod. Commun.* **2014**, *9*, 1403-1406

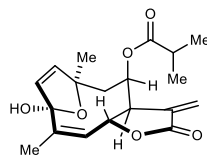

Tagitinin F (**16**)

**Isolation**

*tithonia tagitiflora* (no NMR)  
*J. Pharm. Sci.* **1976**, *65*, 918-920  
C<sub>8</sub> revised  
*Indian. J. Chem. B*, **1977**, *15B*, 208-211  
*Tithonia diversifolia*  
*J. Org. Chem.* **1979**, *44*, 1831-1835  
*Greenmaniella resinosa*  
*Phytochemistry*, **1987**, *26*, 1999-2006  
<sup>1</sup>H and <sup>13</sup>C  
*Photochem. Photobiol.* **2020**, *96*, 14-20  
**Activity**  
**Anti-tumor**  
WO 2005051955 A1 20050609  
*Chem. Pharm. Bull.* **2007**, *55*, 1240-1244  
FR 2941697 A1 20100806  
**Cytotoxicity**  
IC<sub>50</sub> 3μM  
*J. Pharm. Sci.* **1976**, *65*, 918-920  
**Leishmanicidal**  
*Molecules*, **2014**, *19*, 6070-6079  
**Anti-inflammatory**  
*Planta Med.* **2015**, *81*, 450-458  
*Rev. Bras. Farmacogn.* **2015**, *25*, 111-116  
*Metabolites*, **2015**, *5*, 404-430

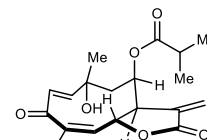

Tagitinin C (**17**)

**Isolation**

*Tithonia tagitiflora* (no NMR)  
*J. Pharm. Sci.* **1976**, *65*, 918-920  
*Tithonia diversifolia*  
C<sub>8</sub> revision <sup>1</sup>H, <sup>13</sup>C  
*J. Org. Chem.* **1979**, *44*, 1831-1835  
*Greenmaniella resinosa*  
*Phytochemistry*, **1987**, *26*, 1999-2006  
<sup>1</sup>H and <sup>13</sup>C  
*Photochem. Photobiol.* **2020**, *96*, 14-20  
**Activity**  
**Feeding deterrents/antifeedant**  
*Phytoparasitica*, **1986**, *14*, 77-80  
*Phytochemistry*, **2008**, *69*, 2052-2060  
**Chemistry & Industry**, **1985**, *5*, 167-168  
*Arab. J. Chem.* **2020**, *13*, 5292-5298  
**Germination and growth inhibitory**  
*Phytochemistry*, **1994**, *36*, 29-36  
**Phytotoxicity**  
*Acta. Biol. Hung.* **2017**, *68*, 187-195  
**Antiplasmodial activity**  
*Planta Med.* **2002**, *68*, 543-545  
**anti-tumor/anticancer/cytotoxicity**  
WO 2005051955 A1 20050609  
*Chem. Pharm. Bull.* **2007**, *55*, 1240-1244  
FR 2941697 A1 20100806  
*Fitoterapia*, **2011**, *82*, 331-341  
*J. Nat. Med.* **2013**, *67*, 98-106  
*Eur. J. Med. Chem.* **2013**, *63*, 313-320  
*J. Nat. Prod.* **2002**, *65*, 532-536  
*J. Agric. Food Chem.* **2011**, *59*, 2347-2355  
*Curr. Top. Med. Chem.* **2017**, *17*, 3256-3268  
**Anti-inflammatory**  
*Metabolites*, **2015**, *5*, 404-430  
*Rev. Bras. Farmacogn.* **2015**, *25*, 111-116  
*Planta Med.* **2015**, *81*, 1296-1307  
**Anti-Tobacco mosaic virus**  
*Pestic. Biochem. Phys.* **2017**, *140*, 24-29  
**Anti-ulcer**  
*Molecules*, **2011**, *16*, 665-674  
**Antitrypanosomal/leishmanicidal/trypanocidal**  
*Molecules*, **2014**, *19*, 6070-6079  
*Fitoterapia*, **2018**, *124*, 145-151  
*Eur. J. Med. Chem.* **2018**, *157*, 852-866  
*Int. Immunopharmacol.* **2019**, *77*, 105961  
**Antimalarials**  
*Bioorg. Med. Chem.* **2009**, *17*, 3229-3256  
**Hsp90 Inhibitors**  
*Biology*, **2014**, *3*, 101-138

**Figure S2.** Other structurally similar natural products.

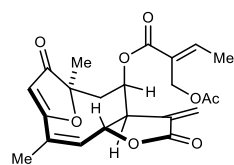

*Phytochemistry*, **1981**, *20*, 1639-1642  
*Phytochemistry*, **1996**, *41*, 1543-1546

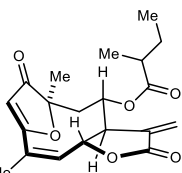

*Phytochemistry*, **1982**, *21*, 1439-1441

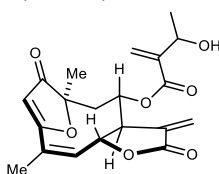

*Phytochemistry*, **1982**, *21*, 1669-1673

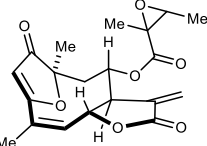

*Phytochemistry*, **1981**, *20*, 739-741  
*Phytochemistry*, **1982**, *21*, 1669-1673  
*Phytochemistry*, **1982**, *21*, 456-457  
*Nat. Prod. Commun.* **2010**, *5*, 681-684

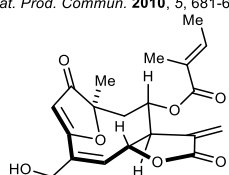

Lychnophorolide B (Centratherin)

**Isolation**  
*Phytochemistry*, **1980**, *19*, 593-597  
*Phytochemistry*, **1982**, *21*, 1669-1673  
*Biochem. Syst. Ecol.* **1996**, *24*, 585-587  
*Phytochemistry*, **1991**, *30*, 519-522  
*Phytochemistry*, **1991**, *30*, 1861-1867  
**Activity**  
*Eur. J. Med. Chem.* **2018**, *157*, 852-866  
*Phytochem. Lett.* **2013**, *6*, 21-25  
*Antimicrob. Agents Chemother.* **2014**, *58*, 325-332

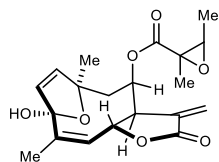

*Phytochemistry*, **1984**, *23*, 1281-1287

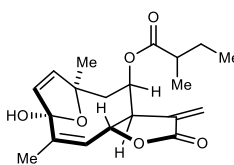

**Isolation**  
*Phytochemistry*, **1987**, *26*, 1999-2006  
**Activity**  
*Phytochemistry*, **2008**, *69*, 2052-2060

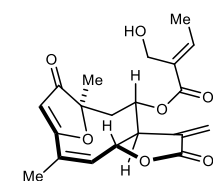

*Phytochemistry*, **1982**, *21*, 1669-1673

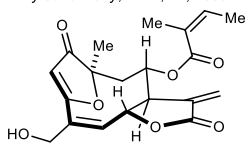

Lychnophorolide A

**Isolation**  
*Biochem. Syst. Ecol.* **1998**, *26*, 671-676  
*J. Braz. Chem. Soc.* **1995**, *6*, 307-311  
*Phytochemistry*, **1993**, *34*, 261-263  
*Biochem. Syst. Ecol.* **1991**, *19*, 440  
*Phytochemistry*, **1982**, *21*, 1087-1091  
*Phytochemistry*, **1982**, *21*, 685-689  
*J. Org. Chem.* **1982**, *47*, 1519-1521  
*Phytochemistry*, **1981**, *20*, 1609-1612  
*Phytochemistry*, **1979**, *18*, 681-682  
**Activity**  
*S. Afr. J. Bot.* **2018**, *117*, 79-82  
*Molecules*, **2016**, *21*, 782  
*Nat. Prod. Res.* **2016**, *30*, 2611-2615  
*Molecules*, **2013**, *18*, 7761-7847  
*Rev. Bras. Farmacogn.* **2012**, *22*, 1295-1300  
*Phytomedicine*, **2012**, *19*, 1173-1177  
*Planta Med.* **2006**, *72*, 1427-1430  
*J. Pharm. Pharmacol.* **2006**, *58*, 853-858  
*J. Med. Chem.* **2006**, *49*, 2241-2252  
*Fitoterapia*, **2005**, *76*, 73-82  
*J. Med. Chem.* **2004**, *47*, 6042-6054  
*Teratog. Carcinog. Mutagen.* **2001**, *21*, 383-393  
*Phytother. Res.* **2000**, *14*, 203-206  
*Bioorg. Med. Chem.* **1999**, *7*, 2343-2352

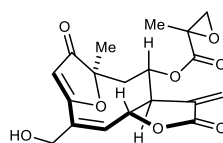

*ChemInform*, **1987**  
(10.1002/chin.198723280)

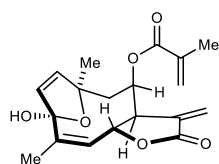

1,2-dehdroyexbrevin B

**Isolation**  
*J. Nat. Prod.* **1986**, *49*, 1165-1166  
*Phytochemistry*, **1984**, *23*, 1967-1970  
**Activity**  
*Phytochemistry*, **1999**, *52*, 613-621

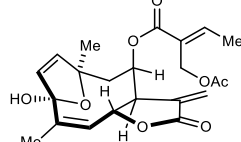

Liatrin

**Isolation**  
*J. Am. Chem. Soc.* **1971**, *93*, 4916-4918  
*J. Org. Chem.* **1973**, *38*, 1853-1858  
**Activity**  
*Med. Chem.* **2018**, *14*, 626-640  
*Eur. J. Med. Chem.* **2008**, *43*, 2197-2205  
*Bioorg. Med. Chem.* **2007**, *15*, 2927-2934  
*QSAR. Comb. Sci.* **2002**, *21*, 276-287  
*J. Med. Chem.* **1971**, *14*, 1147-1152

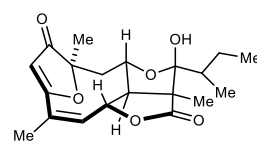

Eremantholide B

**Isolation**  
*J. Chem. Soc., Perkin Trans. 1*, **1978**, 1572-1580  
*J. Org. Chem.* **1980**, *45*, 2503-2506

**Activity**  
*J. Pharm. Pharmacol.* **2019**, *71*, 910-919  
*J. Org. Chem.* **1980**, *45*, 2503-2506

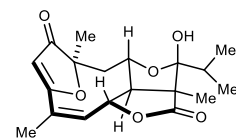

Eremantholide A

**Isolation**  
*Biochem. Syst. Ecol.* **1998**, *26*, 671-676  
*Phytochemistry*, **1982**, *21*, 1669-1673  
*Phytochemistry*, **1980**, *19*, 2663-2668  
*Phytochemistry*, **1980**, *19*, 2669-2673  
*J. Org. Chem.* **1980**, *45*, 2503-2506  
*J. Am. Chem. Soc.* **1975**, *97*, 6884-6886

**Activity**  
*J. Pharm. Pharmacol.* **2019**, *71*, 910-919  
*Bioorg. Med. Chem.* **1999**, *7*, 2343-2352

**Total synthesis**  
*Org. Lett.* **2007**, *9*, 1267-1270  
*J. Org. Chem.* **1995**, *60*, 8179-8193  
*Tetrahedron Lett.* **1995**, *36*, 1487-1490

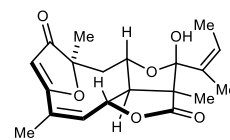

**Isolation**

*Phytochemistry*, **1982**, *21*, 1087-1091  
*Phytochemistry*, **1982**, *21*, 1669-1673  
*J. Org. Chem.* **1982**, *47*, 1519-1521  
*Phytochemistry*, **1981**, *20*, 739-741  
*Phytochemistry*, **1981**, *20*, 1149-1151  
*Phytochemistry*, **1995**, *39*, 387-389

**Activity**  
*Eur. J. Med. Chem.* **2018**, *157*, 852-866

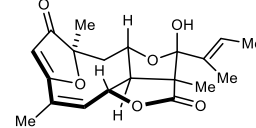

*Phytochemistry*, **1980**, *19*, 2663-2668  
*Phytochemistry*, **1982**, *21*, 1669-1673

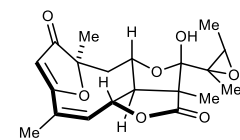

*Phytochemistry*, **1981**, *20*, 739-741  
*Phytochemistry*, **1982**, *21*, 1669-1673

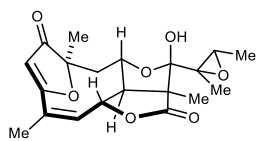

*Phytochemistry*, **1982**, *21*, 1669-1673

### c) Structure revision of atripliciolide (**2**)

The name atripliciolide was initially used for the proposed structure of a parent compound of an  $8\beta$ -OH derivative by King and Robison in 1978 (*Phytochemistry*, **1978**, *17*, 471-474). Its isolation was reported by the same group in 1982 (*Phytochemistry*, **1982**, *21*, 1669-1673).

The structure was confirmed by  $^1\text{H}$  NMR comparison with other known  $8\beta$ -OH furanoheliangolides (*structure of 19 followed from its molecular formula and the  $^1\text{H}$  NMR spectrum (Table 2). The presence of a 6, 12-lactone was deduced from the characteristic signals of H-5 through H-8, which were similar to those of 20. The  $8\beta$ -hydroxyl group was assigned from the couplings observed and from the chemical shifts of H-13, which were at lower fields due to the free hydroxyl at C-8. --original sentences from *Phytochemistry*, **1982**, *21*, 1669-1673).*

However, the proposed  $8\beta$ -OH compound was isolated along with other  $8\alpha$ -esters instead of  $8\beta$ -esters. For example, *Phytochemistry*, **1982**, *21*, 1669-1673 and *J. Braz. Chem. Soc.*, **2005**, *16*, 677-680, indicating that atripliciolide might be  $8\alpha$ -OH.

Both  $8\alpha$ -OH and  $8\beta$ -OH compounds were synthesized and the spectral data was compared with the data obtained from the natural product (based on 2D NMR spectroscopic analyses as well). The structure of atripliciolide was finally revised to have an  $8\alpha$ -OH (**2**). The absolute configuration of **2** was also determined by X-ray diffraction.

**Table S1.** Comparison of natural and synthetic proposed/revised atriplicioid (2) (CDCl<sub>3</sub>)<sup>1</sup>

| 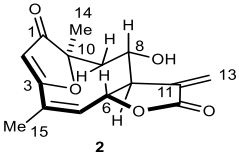 |                                                                                     |                                                                                     |                                                                                      |                                                                                       |                |                |
|-----------------------------------------------------------------------------------|-------------------------------------------------------------------------------------|-------------------------------------------------------------------------------------|--------------------------------------------------------------------------------------|---------------------------------------------------------------------------------------|----------------|----------------|
|                                                                                   | <sup>1</sup> H NMR                                                                  |                                                                                     |                                                                                      | <sup>13</sup> C NMR                                                                   |                |                |
|                                                                                   | Natural<br>(400 MHz)                                                                | 8 $\alpha$ -OH 2<br>(Revised)<br>(500 MHz)                                          | 8 $\beta$ -OH 7<br>(Proposed)<br>(500 MHz)                                           | Natural                                                                               | 2<br>(125 MHz) | 7<br>(125 MHz) |
| 1                                                                                 | -                                                                                   | -                                                                                   | -                                                                                    | -                                                                                     | 206.0          | 206.0          |
| 2                                                                                 | 5.60, s                                                                             | 5.60, s                                                                             | 5.59, s                                                                              | -                                                                                     | 103.2          | 103.2          |
| 3                                                                                 | -                                                                                   | -                                                                                   | -                                                                                    | -                                                                                     | 186.4          | 186.4          |
| 4                                                                                 | -                                                                                   | -                                                                                   | -                                                                                    | -                                                                                     | 131.4          | 131.4          |
| 5                                                                                 | 5.90, dq (3.5, 1.5)                                                                 | 5.91, dq (3.6, 1.7)                                                                 | 5.95, dq (4.4, 1.8)                                                                  | -                                                                                     | 134.6          | 134.6          |
| 6                                                                                 | 4.86, ddq (4, 3.5, 1.5)                                                             | 4.86, tq (4.0, 1.9)                                                                 | 5.63, tq (4.5, 2.0)                                                                  | -                                                                                     | 81.0           | 81.0           |
| 7                                                                                 | 3.68, dddd (4, 3, 2.5, 2)                                                           | 3.66, tt (5.2, 2.7)                                                                 | 3.44, dtd (4.5, 2.9, 1.5)                                                            | -                                                                                     | 52.3           | 52.3           |
| 8                                                                                 | 3.82, m                                                                             | 3.82, m                                                                             | 4.21, qd (3.3, 1.6)                                                                  | -                                                                                     | 71.8           | 71.8           |
| 9 $\alpha$                                                                        | 2.31, dd (14.5, 2.5)                                                                | 2.31, dd (14.7, 2.5)                                                                | 2.44, dd (14.7, 2.5)                                                                 | -                                                                                     | 44.9           | 44.9           |
| 9 $\beta$                                                                         | 2.17, dd (14.5, 8.3)                                                                | 2.18, dd (14.6, 8.6)                                                                | 2.30, dd (14.6, 8.6)                                                                 | -                                                                                     | -              | -              |
| 10                                                                                | -                                                                                   | -                                                                                   | -                                                                                    | -                                                                                     | 89.9           | 87.7           |
| 11                                                                                | -                                                                                   | -                                                                                   | -                                                                                    | -                                                                                     | 134.1          | 140.6          |
| 12                                                                                | -                                                                                   | -                                                                                   | -                                                                                    | -                                                                                     | 169.7          | 169.7          |
| 13a                                                                               | 6.45, dd (3, 0.7)                                                                   | 6.43, dd (3.0, 0.7)                                                                 | 6.35, d (3.1)                                                                        | -                                                                                     | 127.4          | 123.6          |
| 13b                                                                               | 5.86, dd (2.5, 0.7)                                                                 | 5.84, dd (2.6, 0.7)                                                                 | 5.61, d (2.7)                                                                        | -                                                                                     | -              | -              |
| 14                                                                                | 1.44, s                                                                             | 1.56, s                                                                             | 1.45, s                                                                              | -                                                                                     | 20.7           | 21.8           |
| 15                                                                                | 2.07, dd (1.5, 1.5)                                                                 | 2.07, t (1.9)                                                                       | 2.06, t (1.9)                                                                        | -                                                                                     | 19.9           | 19.6           |
| OH                                                                                | -                                                                                   | 2.32                                                                                | 2.32                                                                                 | -                                                                                     | -              | -              |
| 2D NMR correlations                                                               |                                                                                     |                                                                                     |                                                                                      |                                                                                       |                |                |
|                                                                                   | <sup>1</sup> H- <sup>1</sup> H COSY                                                 | HMBC                                                                                | NOESY                                                                                | X-Ray                                                                                 |                |                |
| 2                                                                                 |  |  |  |  |                |                |
| 7                                                                                 |  |  |  |                                                                                       |                |                |

<sup>1</sup> Only the <sup>1</sup>H NMR data was available in the literature (*Phytochemistry*, **1982**, 21, 1669-1673). The solvent peak was set to be 7.27 ppm instead of 7.26 ppm. The chemical shift of 14-Me was erroneous, and has been correct by our full assignment. To the best of our knowledge no carbon NMR had been previously reported.



#### d) Structure elucidation of **13**

8-*epi*-Atripliciolide-2'-methyl butylate was first reported by Bohlmann and Dutta in 1979 (*Phytochemistry*, **1979**, *18*, 676). The configuration of the side chain was not assigned.

In this work 2'-(*S*)-MeBu-**13** was prepared from commercially available (*S*)-(+)-2-methyl butyric anhydride and 2'-(*R+S*)-MeBu-**13** from ( $\pm$ )-2-methyl butyric anhydride. The diastereomers are inseparable. The structures were fully elucidated based on 2D NMR spectroscopic analyses.

Based on  $^1\text{H}$  NMR comparison (**Figure S3**), the structure of natural product was finally elucidated as 8-*epi*-atripliciolide-2'-(*S*)-MeBu (**13**).

**Figure S3.**  $^1\text{H}$  NMR comparison of 8-*epi*-atripliciolide-2'-(*S*)-MeBu (**13**) and 8-*epi*-atripliciolide-2'-(*R+S*)-MeBu.

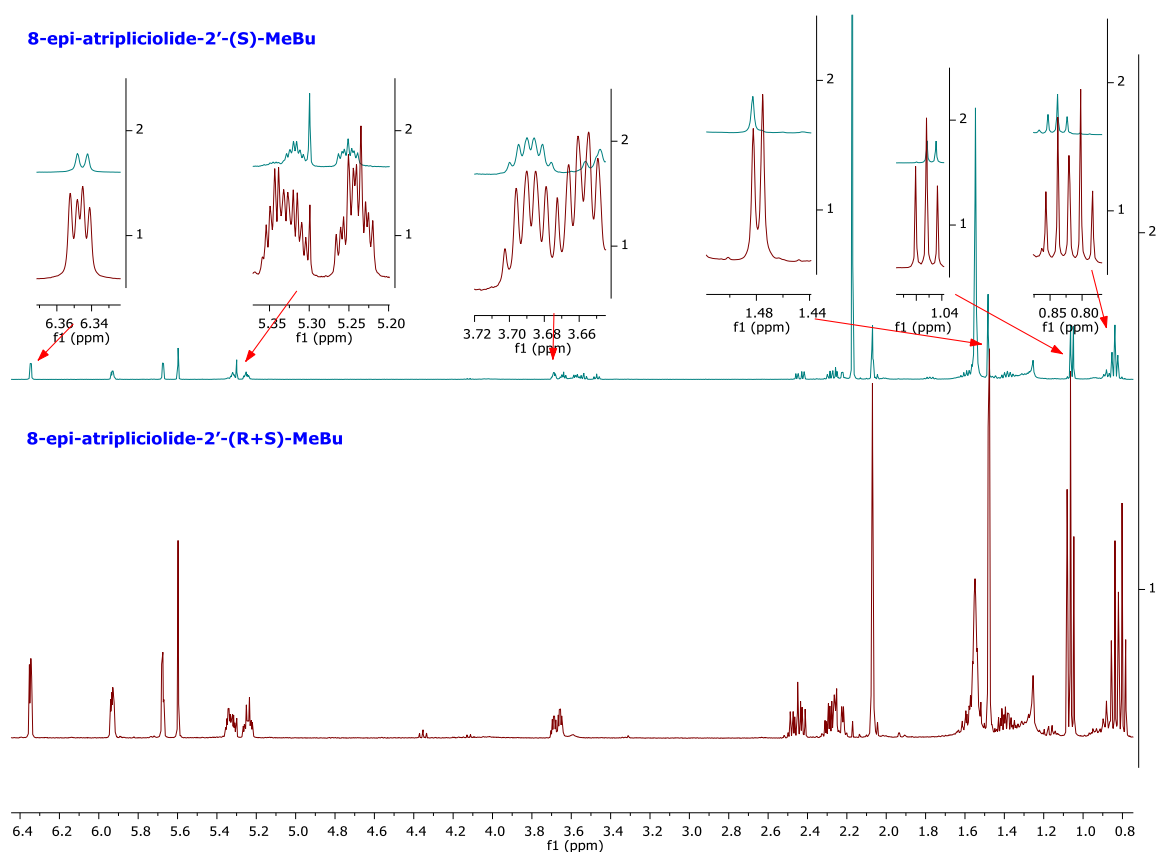

**Table S2.** Comparison of 2'-(*S*)-MeBu-**13**, 2'-(*R*)-MeBu-**13** and natural **13** (<sup>1</sup>H NMR)<sup>2</sup>

| 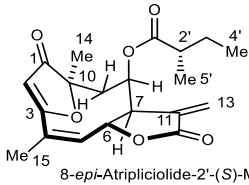<br>8-epi-Atriplicioid-2'-( <i>S</i> )-MeBu ( <b>13</b> ) |                                                                                     |                                                                                     |                                                                                      |                     |                                              |                                              |
|--------------------------------------------------------------------------------------------------------------------------------------------|-------------------------------------------------------------------------------------|-------------------------------------------------------------------------------------|--------------------------------------------------------------------------------------|---------------------|----------------------------------------------|----------------------------------------------|
|                                                                                                                                            | <sup>1</sup> H NMR                                                                  |                                                                                     |                                                                                      | <sup>13</sup> C NMR |                                              |                                              |
|                                                                                                                                            | Natural<br>(270 MHz)                                                                | 2'-( <i>S</i> )-MeBu- <b>13</b><br>(400 MHz)                                        | 2'-( <i>R</i> )-MeBu- <b>13</b><br>(400 MHz)                                         | Natural             | 2'-( <i>S</i> )-MeBu- <b>13</b><br>(100 MHz) | 2'-( <i>R</i> )-MeBu- <b>13</b><br>(100 MHz) |
| 1                                                                                                                                          | -                                                                                   | -                                                                                   | -                                                                                    | -                   | 205.44                                       | 205.50                                       |
| 2                                                                                                                                          | 5.60, s                                                                             | 5.60, s                                                                             | 5.60, s                                                                              | -                   | 102.99                                       | 103.09                                       |
| 3                                                                                                                                          | -                                                                                   | -                                                                                   | -                                                                                    | -                   | 185.10                                       | 185.10                                       |
| 4                                                                                                                                          | -                                                                                   | -                                                                                   | -                                                                                    | -                   | 131.92                                       | 131.97                                       |
| 5                                                                                                                                          | 5.93, dq (2.5, 1.5)                                                                 | 5.93, dq (3.6, 1.7)                                                                 | 5.93, m                                                                              | -                   | 134.29                                       | 134.23                                       |
| 6                                                                                                                                          | 5.32, br dq (2.5, ~2)                                                               | 5.32, dq (4.4, 2.1)                                                                 | 5.34, m                                                                              | -                   | 87.48                                        | 87.51                                        |
| 7                                                                                                                                          | 3.69, m                                                                             | 3.69, dq (4.9, 2.6)                                                                 | 3.66, dq (4.9, 2.6)                                                                  | -                   | 138.29                                       | 138.46                                       |
| 8                                                                                                                                          | 5.25, ddd (5.5, 3.5, 2)                                                             | 5.25, ddd (6.1, 3.7, 2.2)                                                           | 5.23, m                                                                              | -                   | 168.92                                       | 168.87                                       |
| 9 $\alpha$                                                                                                                                 | 2.45, dd (15.5, 5.5)                                                                | 2.45, dd (15.1, 6.1)                                                                | 2.46, dd (15.1, 6.1)                                                                 | -                   | 124.01                                       | 124.07                                       |
| 9 $\beta$                                                                                                                                  | 2.24, dd (15.5, 3.5)                                                                | 2.24, dd (15.1, 3.7)                                                                | 2.24, dd (15.1, 3.7)                                                                 | -                   | -                                            | -                                            |
| 10                                                                                                                                         | -                                                                                   | -                                                                                   | -                                                                                    | -                   | 89.9                                         | 87.7                                         |
| 11                                                                                                                                         | -                                                                                   | -                                                                                   | -                                                                                    | -                   | 134.1                                        | 140.6                                        |
| 12                                                                                                                                         | -                                                                                   | -                                                                                   | -                                                                                    | -                   | 169.7                                        | 169.7                                        |
| 13a                                                                                                                                        | 6.35, d (3)                                                                         | 6.35, d (2.9)                                                                       | 6.35, d (2.9)                                                                        | -                   | 127.4                                        | 123.6                                        |
| 13b                                                                                                                                        | 5.67, d (2.5)                                                                       | 5.67, d (2.5)                                                                       | 5.68, d (2.5)                                                                        | -                   | -                                            | -                                            |
| 14                                                                                                                                         | 1.49, s                                                                             | 1.48, s                                                                             | 1.47, s                                                                              | -                   | 20.7                                         | 21.8                                         |
| 15                                                                                                                                         | 2.07, dd (1.5, 1.5)                                                                 | 2.07, t (1.8)                                                                       | 2.07, t (1.8)                                                                        | -                   | 19.9                                         | 19.6                                         |
| 1'                                                                                                                                         | -                                                                                   | -                                                                                   | -                                                                                    | -                   | 175.16                                       | 175.21                                       |
| 2'                                                                                                                                         | 2.30, tq (7, 7)                                                                     | 2.28, m                                                                             | 2.28, m                                                                              | -                   | 41.16                                        | 41.06                                        |
| 3'a                                                                                                                                        | 1.4, m                                                                              | 1.38, m                                                                             | 1.38, m                                                                              | -                   | 26.37                                        | 26.62                                        |
| 3'b                                                                                                                                        | 1.6, m                                                                              | 1.60, m                                                                             | 1.60, m                                                                              | -                   | -                                            | -                                            |
| 4'                                                                                                                                         | 0.83, t (7)                                                                         | 0.83, t (7)                                                                         | 0.80, t (7)                                                                          | -                   | 11.62                                        | 11.53                                        |
| 5'                                                                                                                                         | 1.05, d (7)                                                                         | 1.05, d (7.1)                                                                       | 1.07, d (7.1)                                                                        | -                   | 16.50                                        | 16.16                                        |
| 2D NMR correlations                                                                                                                        |                                                                                     |                                                                                     |                                                                                      |                     |                                              |                                              |
|                                                                                                                                            | <sup>1</sup> H- <sup>1</sup> H COSY                                                 | HMBC                                                                                | NOESY                                                                                |                     |                                              |                                              |
| <b>13</b>                                                                                                                                  |  |  |  |                     |                                              |                                              |

<sup>2</sup> Previous report (*Phytochemistry*, **1979**, *18*, 676-676) provided <sup>1</sup>H NMR data without showing the spectra and did not assigned the side chain configuration. To the best of our knowledge no carbon NMR had been previously reported.

e) Data comparison and full analyses of 1, 3-6, 8-12, 14-17

Table S3. Comparison of natural and synthetic goyazensolide (1) (CDCl<sub>3</sub>)<sup>3</sup>

|            | <sup>1</sup> H NMR           |                       | <sup>13</sup> C NMR |                        |
|------------|------------------------------|-----------------------|---------------------|------------------------|
|            | Natural<br>(270 MHz)         | Synthetic<br>(500MHz) | Natural<br>(68 MHz) | Synthetic<br>(126 MHz) |
| 1          | -                            | -                     | 204.6               | 204.6                  |
| 2          | 5.83, s                      | 5.82, s               | 106.4               | 106.6                  |
| 3          | -                            | -                     | 184.6               | 184.2                  |
| 4          | -                            | -                     | 135.6               | 135.5                  |
| 5          | 6.27, dt (1.5, 1.5)          | 6.30, dt (1.5)        | 134.6               | 134.2                  |
| 6          | 5.33, dt (1.3, 2.5)          | 5.36, dd (4.9, 2.6)   | 81.7                | 81.5                   |
| 7          | 3.80, m (2.5, 2.5, 3.3, 3.0) | 3.82, t (5.3)         | 51.0                | 50.9                   |
| 8          | 4.53, dt (2.5, 13)           | 4.57, dt (2.2, 11.7)  | 73.5                | 73.2                   |
| 9 $\alpha$ | 2.50, dd (13, 15)            | 2.56-2.48, m          | 43.3                | 43.9                   |
| 9 $\beta$  | -                            | -                     | -                   | -                      |
| 10         | -                            | -                     | 89.7                | 89.8                   |
| 11         | -                            | -                     | 135.6               | 135.3                  |
| 12         | -                            | -                     | 166.8               | 166.8                  |
| 13a        | 6.22, d (3.3)                | 6.25, d (3.1)         | 126.2               | 126.6                  |
| 13b        | 5.49, d (3.0)                | 5.49, d (2.7)         | -                   | -                      |
| 14         | 1.52, s                      | 1.56, s               | 20.6                | 20.7                   |
| 15         | 4.38, s (1.5, 1.3)           | 4.42, dt (3.1, 1.7)   | 62.9                | 63.2                   |
| 1'         | -                            | -                     | 168.7               | 168.7                  |
| 2'         | -                            | -                     | 133.6               | 133.1                  |
| 3'a        | 6.02, s (1)                  | 6.03, s               | 124.5               | 124.6                  |
| 3'b        | 5.56, m (1.5)                | 5.59-5.54, m          | -                   | -                      |
| 4'         | 1.83, m                      | 1.85, s               | 17.8                | 18.0                   |

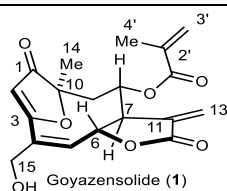

<sup>3</sup> For NMR, see: *Phytochemistry*, **1976**, *15*, 191-193, structure misassignment as C-8 lactone. For structure revision, see: *J. Org. Chem.* **1982**, *47*, 2798-2800. For detailed full spectral assignments, see: *Magn. Reson. Chem.* **2001**, *39*, 3219-221.

**Table S4.** Comparison of natural and synthetic 15-deoxygoyazensolide (**3**) (CDCl<sub>3</sub>)<sup>4</sup>

|            | <sup>1</sup> H NMR    |                        | <sup>13</sup> C NMR  |                        |
|------------|-----------------------|------------------------|----------------------|------------------------|
|            | Natural<br>(500 MHz)  | Synthetic<br>(400 MHz) | Natural<br>(125 MHz) | Synthetic<br>(100 MHz) |
| 1          | -                     | -                      | 204.8                | 204.8                  |
| 2          | 5.71, s               | 5.71, s                | 104.7                | 104.7                  |
| 3          | -                     | -                      | 186.8                | 186.9                  |
| 4          | -                     | -                      | 130.4                | 130.3                  |
| 5          | 6.00, m               | 6.00, m                | 135.0                | 135.0                  |
| 6          | 5.26, m               | 5.26, m                | 81.5                 | 81.5                   |
| 7          | 3.72, m               | 3.73, dq (5.7, 2.9)    | 51.1                 | 51.1                   |
| 8          | 4.55, dt (11.5, 2.9)  | 4.54, dt (11.6, 2.5)   | 73.4                 | 73.3                   |
| 9 $\alpha$ | 2.48, dd (13.8, 11.5) | 2.48, dd (13.9, 11.6)  | 43.8                 | 43.8                   |
| 9 $\beta$  | 2.31, dd (13.8, 2.0)  | 2.31, dd (13.9, 2.1)   | -                    | -                      |
| 10         | -                     | -                      | 89.6                 | 89.6                   |
| 11         | -                     | -                      | 133.5                | 133.4                  |
| 12         | -                     | -                      | 168.8                | 168.8                  |
| 13a        | 6.22, d (3.1)         | 6.21, d (3.1)          | 124.4                | 124.5                  |
| 13b        | 5.46, d (2.8)         | 5.45, d (2.7)          | -                    | -                      |
| 14         | 1.53, s               | 1.53, s                | 20.6                 | 20.6                   |
| 15         | 2.08, t (2.2)         | 2.07, t (2.0)          | 20.3                 | 20.4                   |
| 1'         | -                     | -                      | 166.7                | 166.7                  |
| 2'         | -                     | -                      | 135.5                | 135.4                  |
| 3'a        | 6.01, dq (1.6, 1.0)   | 6.01, m                | 126.4                | 126.5                  |
| 3'b        | 5.54, quint (1.6)     | 5.54, m                | -                    | -                      |
| 4'         | 1.83, dd (1.6, 1.0)   | 1.83, dd (1.6, 1.0)    | 18.0                 | 18.0                   |

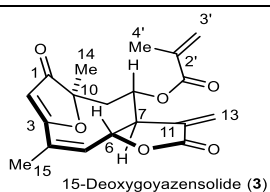

<sup>4</sup> Previous report (*Magn. Reson. Chem.* **2004**, *42*, 364–367) provides detailed full spectral assignments; for first isolation, see: *Phytochemistry*, **1976**, *15*, 1775–1776; for structure revision, see: *J. Org. Chem.* **1982**, *47*, 2798–2800. <sup>13</sup>C chemical shifts are reported relative to chloroform  $\delta$  77.00 ppm instead of 77.16 ppm.

**Table S5.** Comparison of natural and synthetic lychnopholide (**4**) (CDCl<sub>3</sub>)<sup>5</sup>

|                            | <sup>1</sup> H NMR                  |                        | <sup>13</sup> C NMR |                        |
|----------------------------|-------------------------------------|------------------------|---------------------|------------------------|
|                            | Natural<br>(270 MHz)                | Synthetic<br>(400 MHz) | Natural<br>(68 MHz) | Synthetic<br>(100 MHz) |
| 1                          | -                                   | -                      | 204.71              | 204.85                 |
| 2                          | 5.72, s                             | 5.72, s                | 104.69              | 104.75                 |
| 3                          | -                                   | -                      | 186.83              | 186.91                 |
| 4                          | -                                   | -                      | 130.44              | 130.31                 |
| 5                          | 6.02, dq (3, 1.7)                   | 6.02, dt (3.2, 1.7)    | 135.12              | 135.06                 |
| 6                          | 5.30, ddq, (5, 3, 2.7)              | 5.31, dt (5.1, 2.6)    | 81.61               | 81.69                  |
| 7                          | 3.72, dddd (5, 3.5, 2.8, 2.5)       | 3.72, dq (5.5, 2.8)    | 51.23               | 51.17                  |
| 8                          | 4.54, ddd, (12, 2.5, 2)             | 4.54, dt (11.8, 2.4)   | 73.00               | 72.97                  |
| 9 $\alpha$                 | 2.49, dd (14, 12)                   | 2.48, dd (13.8, 11.7)  | 44.04               | 44.04                  |
| 9 $\beta$                  | 2.32, dd (14, 2)                    | 2.31, dd (13.9, 2.1)   | -                   | -                      |
| 10                         | -                                   | -                      | 89.64               | 89.70                  |
| 11                         | -                                   | -                      | 133.84              | 133.72                 |
| 12                         | -                                   | -                      | 168.02              | 168.91                 |
| 13a                        | 6.23, d (3.2)                       | 6.23, d (3.1)          | 124.10              | 124.27                 |
| 13b                        | 5.44, d (2.8)                       | 5.44, d (2.7)          | -                   | -                      |
| 14                         | 1.54, s                             | 1.54, s                | 20.65               | 20.70                  |
| 15                         | 2.09, dd (2.7, 1.7)                 | 2.09, t (2.0)          | 20.22               | 20.35                  |
| 1'                         | -                                   | -                      | 167.00              | 167.06                 |
| 2'                         | -                                   | -                      | 126.51              | 126.38                 |
| 3'                         | 6.09, qq (7, 1.5)                   | 6.09, qq (7.3, 1.4)    | 140.54              | 140.80                 |
| 4'                         | 1.90, dq (7, 1.5)                   | 1.89, dq (7.3, 1.5)    | 15.64               | 15.71                  |
| 5'                         | 1.80, dq (1.5, 1.5)                 | 1.79, p (1.6)          | 19.93               | 20.03                  |
| <b>2D NMR correlations</b> |                                     |                        |                     |                        |
|                            | <sup>1</sup> H- <sup>1</sup> H COSY | HMBC                   | NOESY               |                        |
| <b>4</b>                   |                                     |                        |                     |                        |

<sup>5</sup> Previous report (*phytochemistry*, **1980**, *19*, 2381-2385) provides the <sup>1</sup>H NMR. Solvent peak was set up at 7.27 ppm instead of 7.26 ppm. And the <sup>13</sup>C NMR was provided in a later publication (*phytochemistry*, **1989**, *28*, 1441-1451) with the solvent peak set up at 77 ppm instead of 77.16 ppm.

**Table S6.** Comparison of natural and synthetic atriplicioidide-tiglate (**5**) (CDCl<sub>3</sub>)<sup>6</sup>

| 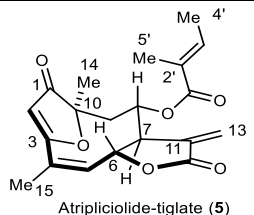<br>Atriplicioidide-tiglate ( <b>5</b> ) |                                                                                     |                                                                                     |                                                                                       |                        |
|---------------------------------------------------------------------------------------------------------------------------|-------------------------------------------------------------------------------------|-------------------------------------------------------------------------------------|---------------------------------------------------------------------------------------|------------------------|
|                                                                                                                           | <sup>1</sup> H NMR                                                                  |                                                                                     | <sup>13</sup> C NMR                                                                   |                        |
|                                                                                                                           | Natural<br>(270 MHz)                                                                | Synthetic<br>(400 MHz)                                                              | Natural                                                                               | Synthetic<br>(100 MHz) |
| 1                                                                                                                         | -                                                                                   | -                                                                                   | -                                                                                     | 205.0                  |
| 2                                                                                                                         | 5.71, s                                                                             | 5.70, s                                                                             | -                                                                                     | 104.8                  |
| 3                                                                                                                         | -                                                                                   | -                                                                                   | -                                                                                     | 187.0                  |
| 4                                                                                                                         | -                                                                                   | -                                                                                   | -                                                                                     | 130.4                  |
| 5                                                                                                                         | 6.00, dq (3, 1.7)                                                                   | 6.01, dq (3.4, 1.7)                                                                 | -                                                                                     | 135.2                  |
| 6                                                                                                                         | 5.28, ddq, (5, 3, 2.5)                                                              | 5.28, dt (5.2, 2.7)                                                                 | -                                                                                     | 81.7                   |
| 7                                                                                                                         | 3.73, dddd (5, 3.2, 2.8, 2.5)                                                       | 3.72, dq (5.6, 2.9)                                                                 | -                                                                                     | 51.3                   |
| 8                                                                                                                         | 4.54, ddd, (12, 2.5, 2)                                                             | 4.54, dt (11.6, 2.5)                                                                | -                                                                                     | 73.3                   |
| 9 $\alpha$                                                                                                                | 2.47, dd (14, 12)                                                                   | 2.47, dd (13.9, 11.6)                                                               | -                                                                                     | 44.1                   |
| 9 $\beta$                                                                                                                 | 2.30, dd (14, 2)                                                                    | 2.31, dd (14.0, 2.1)                                                                | -                                                                                     | -                      |
| 10                                                                                                                        | -                                                                                   | -                                                                                   | -                                                                                     | 89.8                   |
| 11                                                                                                                        | -                                                                                   | -                                                                                   | -                                                                                     | 133.7                  |
| 12                                                                                                                        | -                                                                                   | -                                                                                   | -                                                                                     | 169.1                  |
| 13a                                                                                                                       | 6.20, d (3.2)                                                                       | 6.20, d (3.1)                                                                       | -                                                                                     | 124.4                  |
| 13b                                                                                                                       | 5.44, d (2.8)                                                                       | 5.44, d (2.6)                                                                       | -                                                                                     | -                      |
| 14                                                                                                                        | 1.53, s                                                                             | 1.53, s                                                                             | -                                                                                     | 20.8                   |
| 15                                                                                                                        | 2.08, dd (2.5, 1.7)                                                                 | 2.08, t (2.0)                                                                       | -                                                                                     | 20.5                   |
| 1'                                                                                                                        | -                                                                                   | -                                                                                   | -                                                                                     | 167.5                  |
| 2'                                                                                                                        | -                                                                                   | -                                                                                   | -                                                                                     | 127.9                  |
| 3'                                                                                                                        | 6.77, qq (7, 1.5)                                                                   | 6.77, qq (7.1, 1.4)                                                                 | -                                                                                     | 138.8                  |
| 4'                                                                                                                        | 1.77, dq (7, 1.5)                                                                   | 1.76, dd (7.1, 1.2)                                                                 | -                                                                                     | 14.6                   |
| 5'                                                                                                                        | 1.73, dq (1.5, 1.5)                                                                 | 1.73, t (1.3)                                                                       | -                                                                                     | 11.9                   |
| 2D NMR correlations                                                                                                       |                                                                                     |                                                                                     |                                                                                       |                        |
|                                                                                                                           | <sup>1</sup> H- <sup>1</sup> H COSY                                                 | HMBC                                                                                | NOESY                                                                                 |                        |
| <b>5</b>                                                                                                                  |  |  |  |                        |

<sup>6</sup> Solvent peak was set up at 7.27ppm instead of 7.26 ppm. <sup>1</sup>H NMR had been previously reported (*Phytochemistry*, **1980**, *19*, 2663-2668). To the best of our knowledge no carbon NMR had been previously reported.

**Table S7.** Comparison of natural and synthetic atripliciolide-isobutyrate (**6**) (CDCl<sub>3</sub>)<sup>7</sup>

| 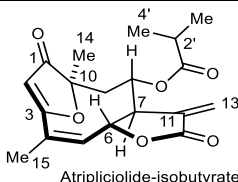<br>Atripliciolide-isobutyrate ( <b>6</b> ) |                                                                                     |                                                                                     |                                                                                       |                        |
|------------------------------------------------------------------------------------------------------------------------------|-------------------------------------------------------------------------------------|-------------------------------------------------------------------------------------|---------------------------------------------------------------------------------------|------------------------|
|                                                                                                                              | <sup>1</sup> H NMR                                                                  |                                                                                     | <sup>13</sup> C NMR                                                                   |                        |
|                                                                                                                              | Natural<br>(270 MHz)                                                                | Synthetic<br>(500 MHz)                                                              | Natural                                                                               | Synthetic<br>(125 MHz) |
| 1                                                                                                                            | -                                                                                   | -                                                                                   | -                                                                                     | 205.0                  |
| 2                                                                                                                            | 5.70, s                                                                             | 5.70, s                                                                             | -                                                                                     | 104.7                  |
| 3                                                                                                                            | -                                                                                   | -                                                                                   | -                                                                                     | 187.1                  |
| 4                                                                                                                            | -                                                                                   | -                                                                                   | -                                                                                     | 130.4                  |
| 5                                                                                                                            | <b>5.90, dq, (3, 1.5)</b>                                                           | 5.99, dt (3.1, 1.8)                                                                 | -                                                                                     | 135.2                  |
| 6                                                                                                                            | 5.23, ddq (5, 3, 1.5)                                                               | 5.23, dp, (4.9, 2.3)                                                                | -                                                                                     | 81.8                   |
| 7                                                                                                                            | 3.72, dddd (5, 3, 2.5, 2.5)                                                         | 3.71, dq (5.6, 2.8)                                                                 | -                                                                                     | 51.3                   |
| 8                                                                                                                            | 4.42, ddd (11.5, 2.5, 2)                                                            | 4.42, dt, (11.8, 2.4)                                                               | -                                                                                     | 72.8                   |
| 9 $\alpha$                                                                                                                   | <b>2.40, dd (14, 2)</b>                                                             | 2.42, dd (13.9, 11.6)                                                               | -                                                                                     | 44.1                   |
| 9 $\beta$                                                                                                                    | <b>2.25, dd (14, 11.5)</b>                                                          | 2.25, dd (13.9, 2.0)                                                                | -                                                                                     | -                      |
| 10                                                                                                                           | -                                                                                   | -                                                                                   | -                                                                                     | 105.0                  |
| 11                                                                                                                           | -                                                                                   | -                                                                                   | -                                                                                     | 133.3                  |
| 12                                                                                                                           | -                                                                                   | -                                                                                   | -                                                                                     | 168.9                  |
| 13a                                                                                                                          | 6.26, d (3)                                                                         | 6.26, d (3.1)                                                                       | -                                                                                     | 124.4                  |
| 13b                                                                                                                          | 5.47, d (2.5)                                                                       | 5.46, d (2.6)                                                                       | -                                                                                     | -                      |
| 14                                                                                                                           | 1.52, s                                                                             | 1.52, s                                                                             | -                                                                                     | 20.8                   |
| 15                                                                                                                           | 2.08, dd (1.5, 1.5)                                                                 | 2.07, t (2.0)                                                                       | -                                                                                     | 20.5                   |
| 1'                                                                                                                           | -                                                                                   | -                                                                                   | -                                                                                     | 176.7                  |
| 2'                                                                                                                           | 2.39, qq (7, 7)                                                                     | 2.39, sept, (7)                                                                     | -                                                                                     | 33.8                   |
| 3'/4'                                                                                                                        | <b>1.40, d (7)</b>                                                                  | 1.04, d (7)                                                                         | -                                                                                     | 18.9                   |
| 3'/4'                                                                                                                        | 1.08, d (7)                                                                         | 1.08, d (7)                                                                         | -                                                                                     | 18.7                   |
| 2D NMR correlations                                                                                                          |                                                                                     |                                                                                     |                                                                                       |                        |
|                                                                                                                              | <sup>1</sup> H- <sup>1</sup> H COSY                                                 | HMBC                                                                                | NOESY                                                                                 |                        |
| <b>7</b>                                                                                                                     |  |  |  |                        |

<sup>7</sup> <sup>1</sup>H NMR had been previously reported (*phytochemistry*, **1982**, *21*, 1669-1673) with different chemical shifts for H<sub>5</sub> and H<sub>3</sub>, and J coupling constants of 9 $\alpha$  and 9 $\beta$  swapped. To the best of our knowledge no carbon NMR had been previously reported.

**Table S8.** Comparison of natural and synthetic calaxin (**8**) (CDCl<sub>3</sub>)<sup>8</sup>

| 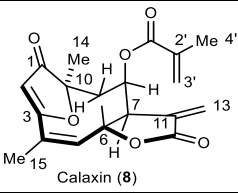 |                                                                                     |                                                                                     |                                                                                       |                        |
|-----------------------------------------------------------------------------------|-------------------------------------------------------------------------------------|-------------------------------------------------------------------------------------|---------------------------------------------------------------------------------------|------------------------|
|                                                                                   | <sup>1</sup> H NMR                                                                  |                                                                                     | <sup>13</sup> C NMR                                                                   |                        |
|                                                                                   | Natural<br>(270 MHz)                                                                | Synthetic<br>(500 MHz)                                                              | Natural                                                                               | Synthetic<br>(125 MHz) |
| 1                                                                                 | -                                                                                   | -                                                                                   | -                                                                                     | 205.4                  |
| 2                                                                                 | 5.59, s                                                                             | 5.60, s                                                                             | -                                                                                     | 103.3                  |
| 3                                                                                 | -                                                                                   | -                                                                                   | -                                                                                     | 185.2                  |
| 4                                                                                 | -                                                                                   | -                                                                                   | -                                                                                     | 131.9                  |
| 5                                                                                 | 5.94, dq (2.5, 1.5)                                                                 | 5.95, dq (3.6, 1.8)                                                                 | -                                                                                     | 134.2                  |
| 6                                                                                 | 5.28, dq (2, 1.5)                                                                   | 5.28, tq (4.0, 1.9)                                                                 | -                                                                                     | 75.3                   |
| 7                                                                                 | 3.70, m                                                                             | 3.69, dtd (4.6, 2.7, 1.9)                                                           | -                                                                                     | 48.5                   |
| 8                                                                                 | 5.18, ddd (5, 3, 3)                                                                 | 5.19, ddd, (5.4, 3.4, 1.9)                                                          | -                                                                                     | 75.1                   |
| 9 $\alpha$                                                                        | 2.55, dd (15, 5)                                                                    | 2.55, dd (15.2, 5.4)                                                                | -                                                                                     | 42.6                   |
| 9 $\beta$                                                                         | 2.31, dd (15, 3)                                                                    | 2.31, dd (15.1, 3.4)                                                                | -                                                                                     | -                      |
| 10                                                                                | -                                                                                   | -                                                                                   | -                                                                                     | 87.8                   |
| 11                                                                                | -                                                                                   | -                                                                                   | -                                                                                     | 139.0                  |
| 12                                                                                | -                                                                                   | -                                                                                   | -                                                                                     | 168.9                  |
| 13a                                                                               | 6.35, d (3)                                                                         | 6.35, d (2.9)                                                                       | -                                                                                     | 123.6                  |
| 13b                                                                               | 5.67, d (2.5)                                                                       | 5.67, d (2.6)                                                                       | -                                                                                     | -                      |
| 14                                                                                | 1.48, s                                                                             | 1.49, s                                                                             | -                                                                                     | 21.5                   |
| 15                                                                                | 2.07, dd (1.5, 1.5)                                                                 | 2.07, t (1.9)                                                                       | -                                                                                     | 19.7                   |
| 1'                                                                                | -                                                                                   | -                                                                                   | -                                                                                     | 165.9                  |
| 2'                                                                                | -                                                                                   | -                                                                                   | -                                                                                     | 135.2                  |
| 3'a                                                                               | 6.02, br s                                                                          | 6.02, p (1.0)                                                                       | -                                                                                     | 127.6                  |
| 3'b                                                                               | 5.60, dq (7, 1)                                                                     | 5.61, dq (7.1, 1.1)                                                                 | -                                                                                     | 18.3                   |
| 4'                                                                                | 1.86, br s                                                                          | 1.86, dd (1.6, 0.9)                                                                 | -                                                                                     | 21.5                   |
| 2D NMR correlations                                                               |                                                                                     |                                                                                     |                                                                                       |                        |
|                                                                                   | <sup>1</sup> H- <sup>1</sup> H COSY                                                 | HMBC                                                                                | NOESY                                                                                 |                        |
| <b>8</b>                                                                          |  |  |  |                        |

<sup>8</sup> For <sup>1</sup>H NMR, see: *Phytochemistry*, **1978**, *17*, 471-474. To the best of our knowledge no carbon NMR had been previously reported.



**Table S9.** Comparison of natural and synthetic 8-*epi*-lychnopholide (**9**) (CDCl<sub>3</sub>)<sup>9</sup>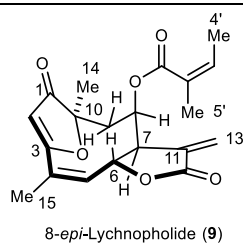

|            | <sup>1</sup> H NMR       |                        |
|------------|--------------------------|------------------------|
|            | Natural<br>(270 MHz)     | Synthetic<br>(300 MHz) |
| 1          | -                        | -                      |
| 2          | 5.59, s                  | 5.60, s                |
| 3          | -                        | -                      |
| 4          | -                        | -                      |
| 5          | 5.95, dq (4, 1.5)        | 5.95, m                |
| 6          | 5.35, ddq (4, 4, 1.5)    | 5.35, m                |
| 7          | 3.71, ddd (4, 2)         | 3.70, m                |
| 8          | <b>5.14, d (6, 3, 2)</b> | 5.28, m                |
| 9 $\alpha$ | 2.53, dd (15, 6)         | 2.54, dd (15.3, 5.6)   |
| 9 $\beta$  | 2.30, dd (15, 3)         | 2.30, dd (15.1, 3.7)   |
| 10         | -                        | -                      |
| 11         | -                        | -                      |
| 12         | -                        | -                      |
| 13a        | 6.36, d (4.5)            | 6.34, d (2.9)          |
| 13b        | 5.70, d (4.5)            | 5.70, d (2.6)          |
| 14         | 1.49, s                  | 1.49, s                |
| 15         | 2.08, dd (1.5, 1.5)      | 2.08, t (1.8)          |
| 1'         | -                        | -                      |
| 2'         | -                        | -                      |
| 3'         | 6.13, qq (7, 1.5)        | 6.12, m                |
| 4'         | 1.94, dq (7, 1.5)        | 1.94, m                |
| 5'         | 1.80, dq (7, 1.5)        | 1.80, m                |

Z/E isomerization from anglate to tiglate happened during the esterification and we obtained the tiglate **10** as major product. We couldn't obtain enough 8-*epi*-lychnopholide (**9**) for full analysis.

For detailed information, see Supplementary Section f.

<sup>9</sup> A previous report (*Phytochemistry*, **1981**, 20, 743-749) gave the chemical shift for H-8 to be at 5.14 ppm. A later report (*Phytochemistry*, **1982**, 21, 464-465) assigned a chemical shift for H-8 to be at 5.25 ppm very similar to ours.

**Table S10.** Comparison of natural and synthetic 8-*epi*-atripliciolide-tiglate (**10**) (CDCl<sub>3</sub>)<sup>10</sup>

| 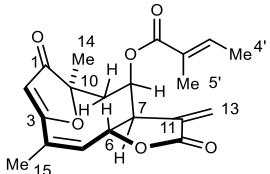<br>8- <i>epi</i> -Atripliciolide-tiglate ( <b>10</b> ) |                                                                                     |                                                                                     |                                                                                       |                        |
|------------------------------------------------------------------------------------------------------------------------------------------|-------------------------------------------------------------------------------------|-------------------------------------------------------------------------------------|---------------------------------------------------------------------------------------|------------------------|
|                                                                                                                                          | <b><sup>1</sup>H NMR</b>                                                            |                                                                                     | <b><sup>13</sup>C NMR</b>                                                             |                        |
|                                                                                                                                          | Natural<br>(270 MHz)                                                                | Synthetic<br>(400 MHz)                                                              | Natural                                                                               | Synthetic<br>(100 MHz) |
| 1                                                                                                                                        | -                                                                                   | -                                                                                   | -                                                                                     | 205.4                  |
| 2                                                                                                                                        | 5.59, s                                                                             | 5.59, s                                                                             | -                                                                                     | 103.3                  |
| 3                                                                                                                                        | -                                                                                   | -                                                                                   | -                                                                                     | 185.1                  |
| 4                                                                                                                                        | -                                                                                   | -                                                                                   | -                                                                                     | 131.8                  |
| 5                                                                                                                                        | 5.94, dq (2.5, 1.5)                                                                 | 5.94, dq (3.6, 1.8)                                                                 | -                                                                                     | 134.3                  |
| 6                                                                                                                                        | 5.28, dq (2, 1.5)                                                                   | 5.28, m                                                                             | -                                                                                     | 75.4                   |
| 7                                                                                                                                        | 3.70, m                                                                             | 3.69, m                                                                             | -                                                                                     | 48.6                   |
| 8                                                                                                                                        | 5.18, ddd (5, 3, 3)                                                                 | 5.19, ddd, (5.4, 3.4, 1.9)                                                          | -                                                                                     | 74.8                   |
| 9 $\alpha$                                                                                                                               | 2.52, dd (15, 5)                                                                    | 2.52, dd (15.1, 5.4)                                                                | -                                                                                     | 42.7                   |
| 9 $\beta$                                                                                                                                | 2.30, dd (15, 3)                                                                    | 2.30, dd (15.1, 3.4)                                                                | -                                                                                     | -                      |
| 10                                                                                                                                       | -                                                                                   | -                                                                                   | -                                                                                     | 87.8                   |
| 11                                                                                                                                       | -                                                                                   | -                                                                                   | -                                                                                     | 139.1                  |
| 12                                                                                                                                       | -                                                                                   | -                                                                                   | -                                                                                     | 169.0                  |
| 13a                                                                                                                                      | 6.33, d (3)                                                                         | 6.33, d (2.9)                                                                       | -                                                                                     | 123.5                  |
| 13b                                                                                                                                      | 5.65, d (2.5)                                                                       | 5.66, d (2.5)                                                                       | -                                                                                     | -                      |
| 14                                                                                                                                       | 1.48, s                                                                             | 1.48, s                                                                             | -                                                                                     | 21.5                   |
| 15                                                                                                                                       | 2.07, dd (1.5, 1.5)                                                                 | 2.07, t (1.9)                                                                       | -                                                                                     | 14.8                   |
| 1'                                                                                                                                       | -                                                                                   | -                                                                                   | -                                                                                     | 166.6                  |
| 2'                                                                                                                                       | -                                                                                   | -                                                                                   | -                                                                                     | 127.6                  |
| 3'                                                                                                                                       | 6.76, qq (7, 1)                                                                     | 6.76, qq (7, 1.4)                                                                   | -                                                                                     | 139.7                  |
| 4'                                                                                                                                       | 1.78, dq (7, 1)                                                                     | 1.78, dq (7.1, 1.1)                                                                 | -                                                                                     | 19.7                   |
| 5'                                                                                                                                       | 1.74, br s                                                                          | 1.74, p (1.1)                                                                       | -                                                                                     | 12.0                   |
| <b>2D NMR correlations</b>                                                                                                               |                                                                                     |                                                                                     |                                                                                       |                        |
|                                                                                                                                          | <b><sup>1</sup>H-<sup>1</sup>H COSY</b>                                             | <b>HMBC</b>                                                                         | <b>NOESY</b>                                                                          |                        |
| <b>10</b>                                                                                                                                |  |  |  |                        |

<sup>10</sup> For <sup>1</sup>H NMR, see: *Phytochemistry*, **1978**, *17*, 471-474. To the best of our knowledge no carbon NMR had been previously reported.

**Table S11.** Comparison of natural and synthetic ciliarin (**11**) (CDCl<sub>3</sub>)<sup>11</sup>

| 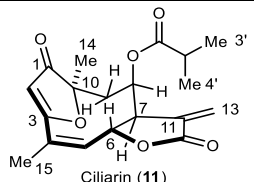<br>Ciliarin ( <b>11</b> ) |                                                                                     |                                                                                     |                                                                                       |                        |
|-------------------------------------------------------------------------------------------------------------|-------------------------------------------------------------------------------------|-------------------------------------------------------------------------------------|---------------------------------------------------------------------------------------|------------------------|
|                                                                                                             | <sup>1</sup> H NMR                                                                  |                                                                                     | <sup>13</sup> C NMR                                                                   |                        |
|                                                                                                             | Natural<br>(270 MHz)                                                                | Synthetic<br>(400 MHz)                                                              | Natural                                                                               | Synthetic<br>(100 MHz) |
| 1                                                                                                           | -                                                                                   | -                                                                                   | -                                                                                     | 205.5                  |
| 2                                                                                                           | 5.59, s                                                                             | 5.60, s                                                                             | -                                                                                     | 103.1                  |
| 3                                                                                                           | -                                                                                   | -                                                                                   | -                                                                                     | 185.1                  |
| 4                                                                                                           | -                                                                                   | -                                                                                   | -                                                                                     | 132.0                  |
| 5                                                                                                           | 5.94, dq (2.5, 1.5)                                                                 | 5.93, dq (3.6, 1.8)                                                                 | -                                                                                     | 134.2                  |
| 6                                                                                                           | 5.34, dq (2, 1.5)                                                                   | 5.34, tq (3.9, 1.9)                                                                 | -                                                                                     | 75.4                   |
| 7                                                                                                           | 3.67, m                                                                             | 3.67, dq (4.8, 2.6)                                                                 | -                                                                                     | 48.6                   |
| 8                                                                                                           | 5.21, ddd (5, 3, 3)                                                                 | 5.21, ddd, (5.7, 3.6, 2.1)                                                          | -                                                                                     | 74.0                   |
| 9 $\alpha$                                                                                                  | 2.48, dd (15, 5)                                                                    | 2.48, dd (15.1, 5.4)                                                                | -                                                                                     | 42.0                   |
| 9 $\beta$                                                                                                   | 2.24, dd (15, 3)                                                                    | 2.24, dd (15.1, 3.6)                                                                | -                                                                                     | -                      |
| 10                                                                                                          | -                                                                                   | -                                                                                   | -                                                                                     | 87.5                   |
| 11                                                                                                          | -                                                                                   | -                                                                                   | -                                                                                     | 138.5                  |
| 12                                                                                                          | -                                                                                   | -                                                                                   | -                                                                                     | 168.9                  |
| 13a                                                                                                         | 6.35, d (3)                                                                         | 6.35, d (2.9)                                                                       | -                                                                                     | 124.1                  |
| 13b                                                                                                         | 5.67, d (2.5)                                                                       | 5.67, d (2.5)                                                                       | -                                                                                     | -                      |
| 14                                                                                                          | 1.48, s                                                                             | 1.47, s                                                                             | -                                                                                     | 21.3                   |
| 15                                                                                                          | 2.07, dd (1.5, 1.5)                                                                 | 2.07, t (1.8)                                                                       | -                                                                                     | 19.7                   |
| 1'                                                                                                          | -                                                                                   | -                                                                                   | -                                                                                     | 175.6                  |
| 2'                                                                                                          | 2.46, qq                                                                            | 2.46, m                                                                             | -                                                                                     | 34.1                   |
| 3'/4'                                                                                                       | 1.08, d                                                                             | 1.10, d (2.5)                                                                       | -                                                                                     | 19.0                   |
| 3'/4'                                                                                                       | 1.07, d                                                                             | 1.08, d (2.6)                                                                       | -                                                                                     | 18.6                   |
| 2D NMR correlations                                                                                         |                                                                                     |                                                                                     |                                                                                       |                        |
|                                                                                                             | <sup>1</sup> H- <sup>1</sup> H COSY                                                 | HMBC                                                                                | NOESY                                                                                 |                        |
| <b>11</b>                                                                                                   |  |  |  |                        |

<sup>11</sup> For <sup>1</sup>H NMR, see: *Phytochemistry*, **1978**, *17*, 471-474. To the best of our knowledge no carbon NMR had been previously reported.

**Table S12.** Comparison of natural and synthetic 8-*epi*-atripliciolide-isovalerate (**12**) (CDCl<sub>3</sub>)<sup>12</sup>

| 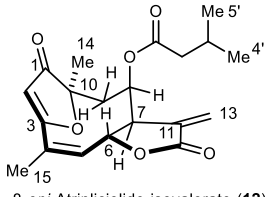<br>8- <i>epi</i> -Atripliciolide-isovalerate ( <b>12</b> ) |                                                                                     |                                                                                     |                                                                                       |                        |
|----------------------------------------------------------------------------------------------------------------------------------------------|-------------------------------------------------------------------------------------|-------------------------------------------------------------------------------------|---------------------------------------------------------------------------------------|------------------------|
|                                                                                                                                              | <sup>1</sup> H NMR                                                                  |                                                                                     | <sup>13</sup> C NMR                                                                   |                        |
|                                                                                                                                              | Natural<br>(270 MHz)                                                                | Synthetic<br>(400 MHz)                                                              | Natural                                                                               | Synthetic<br>(100 MHz) |
| 1                                                                                                                                            | -                                                                                   | -                                                                                   | -                                                                                     | 205.6                  |
| 2                                                                                                                                            | 5.59, s                                                                             | 5.60, s                                                                             | -                                                                                     | 103.2                  |
| 3                                                                                                                                            | -                                                                                   | -                                                                                   | -                                                                                     | 185.1                  |
| 4                                                                                                                                            | -                                                                                   | -                                                                                   | -                                                                                     | 132.0                  |
| 5                                                                                                                                            | 5.93, dq (2.5, 1.5)                                                                 | 5.93, dq (4.4, 1.7)                                                                 | -                                                                                     | 134.2                  |
| 6                                                                                                                                            | 5.34, dq (2, 1.5)                                                                   | 5.34, td (4.4, 2.1)                                                                 | -                                                                                     | 75.5                   |
| 7                                                                                                                                            | 3.65, m                                                                             | 3.64, dq (4.9, 2.5)                                                                 | -                                                                                     | 48.5                   |
| 8                                                                                                                                            | 5.23, ddd (5, 3, 3)                                                                 | 5.24, ddd, (5.8, 3.6, 2.1)                                                          | -                                                                                     | 74.0                   |
| 9 $\alpha$                                                                                                                                   | 2.48, dd (15, 5)                                                                    | 2.48, dd (15.2, 6)                                                                  | -                                                                                     | 42.0                   |
| 9 $\beta$                                                                                                                                    | 2.22, dd (15, 3)                                                                    | 2.23, dd (15.1, 3.6)                                                                | -                                                                                     | -                      |
| 10                                                                                                                                           | -                                                                                   | -                                                                                   | -                                                                                     | 87.5                   |
| 11                                                                                                                                           | -                                                                                   | -                                                                                   | -                                                                                     | 138.5                  |
| 12                                                                                                                                           | -                                                                                   | -                                                                                   | -                                                                                     | 168.9                  |
| 13a                                                                                                                                          | 6.36, d (3)                                                                         | 6.36, d (2.9)                                                                       | -                                                                                     | 124.1                  |
| 13b                                                                                                                                          | 5.68, d (2.5)                                                                       | 5.68, d (2.6)                                                                       | -                                                                                     | -                      |
| 14                                                                                                                                           | 1.48, s                                                                             | 1.47, s                                                                             | -                                                                                     | 21.2                   |
| 15                                                                                                                                           | 2.07, dd (1.5, 1.5)                                                                 | 2.07, t (1.8)                                                                       | -                                                                                     | 19.7                   |
| 1'                                                                                                                                           | -                                                                                   | -                                                                                   | -                                                                                     | 171.6                  |
| 2'                                                                                                                                           | 2.09, dd                                                                            | 2.10, m                                                                             | -                                                                                     | 42.9                   |
| 3'                                                                                                                                           | 1.98, m                                                                             | 1.97, ddd (12.9, 7.5, 6.4)                                                          | -                                                                                     | 25.5                   |
| 4'/5'                                                                                                                                        | 0.90                                                                                | 0.89, d (4.8)                                                                       | -                                                                                     | 22.5                   |
| 4'/5'                                                                                                                                        | 0.87                                                                                | 0.88, d (4.8)                                                                       | -                                                                                     | 22.4                   |
| 2D NMR correlations                                                                                                                          |                                                                                     |                                                                                     |                                                                                       |                        |
|                                                                                                                                              | <sup>1</sup> H- <sup>1</sup> H COSY                                                 | HMBC                                                                                | NOESY                                                                                 |                        |
| <b>12</b>                                                                                                                                    |  |  |  |                        |

<sup>12</sup> For <sup>1</sup>H NMR, see: *Phytochemistry*, **1978**, *17*, 471-474. In this report the chemical shift of 0.87 ppm was wrongly moved to another column on the results table. To the best of our knowledge no carbon NMR had been previously reported.

**Table S13.** Comparison of natural and synthetic eremantholide C (**14**) (CDCl<sub>3</sub>)

|                | <sup>1</sup> H NMR                 |                                    |                            | <sup>13</sup> C NMR               |                                    |                        |
|----------------|------------------------------------|------------------------------------|----------------------------|-----------------------------------|------------------------------------|------------------------|
|                | Natural <sup>13</sup><br>(500 MHz) | Natural <sup>14</sup><br>(500 MHz) | Synthetic<br>(500 MHz)     | Natural <sup>13</sup><br>(125MHz) | Natural <sup>14</sup><br>(125 MHz) | Synthetic<br>(125 MHz) |
| 1              | -                                  | -                                  | -                          | 205.2                             | 205.8                              | 205.3                  |
| 2              | 5.62, s                            | 5.63, s                            | 5.61, s                    | 104.5                             | 104.5                              | 104.7                  |
| 3              | -                                  | -                                  | -                          | 186.8                             | 187.2                              | 186.9                  |
| 4              | -                                  | -                                  | -                          | 130.2                             | 130.0                              | 130.3                  |
| 5              | 6.03, dq (2.7, 1.6)                | 6.03, dq (2.7, 1.6)                | 6.03, dq (3.6, 1.8)        | 134.6                             | 134.7                              | 134.7                  |
| 6              | 4.98, dddq (7, 2.7, 2.4, 0.6)      | 5.00, dddq (7.1, 2.7, 2.2, 0.6)    | 4.98, dp (7.2, 2.4)        | 81.5                              | 81.4                               | 81.6                   |
| 7              | 2.85, dd (7, 4.2)                  | 2.82, dd (7.1, 4.2)                | 2.86, dd (7.2, 4.3)        | 62.5                              | 62.5                               | 62.5                   |
| 8              | 4.14, dddd (11.9, 4.2, 2.6, 0.6)   | 4.10, dddd (11.9, 4.2, 2.6, 0.6)   | 4.15, ddd (11.8, 4.3, 2.8) | 78.5                              | 78.3                               | 78.6                   |
| 9 <sub>α</sub> | 2.06, dd (13.6, 11.9)              | 2.01, dd (13.6, 11.9)              | 2.05, m                    | 43.7                              | 43.5                               | 43.9                   |
| 9 <sub>β</sub> | 2.41, dd (13.6, 2.6)               | 2.47, dd (13.6, 2.6)               | 2.39, dd, (13.6, 2.6)      | -                                 | -                                  | -                      |
| 10             | -                                  | -                                  | -                          | 89.9                              | 90.2                               | 90.1                   |
| 11             | -                                  | -                                  | -                          | 59.8                              | 59.8                               | 59.9                   |
| 12             | -                                  | -                                  | -                          | 175.4                             | 175.7                              | 175.6                  |
| 13             | 1.19, s                            | 1.18, s                            | 1.20, s                    | 21.9                              | 21.9                               | 22.0                   |
| 14             | 1.49, s                            | 1.46, s                            | 1.50, s                    | 20.6                              | 20.5                               | 20.7                   |
| 15             | 2.06, dd (2.4, 1.6)                | 2.05, dd (2.2, 1.6)                | 2.06, m                    | 20.3                              | 20.3                               | 20.5                   |
| 1'             | -                                  | -                                  | -                          | 106.2                             | 106.1                              | 106.3                  |
| 2'             | -                                  | -                                  | -                          | 142.0                             | 142.1                              | 142.1                  |
| 3'a            | 5.08, dd (2.0, 1.5)                | 5.07, dq (2.0, 1.8)                | 5.08, p (1.6).             | 116.1                             | 115.8                              | 116.4                  |
| 3'b            | 5.33, dd (2.0, 0.9)                | 5.30, dq (2.0, 1.1)                | 5.33, dq (1.8, 0.8).       | -                                 | -                                  | -                      |
| 4'             | 1.90, dd (1.5, 0.9)                | 1.90, dd (1.8, 1.1)                | 1.89, dd (1.6, 0.9)        | 18.9                              | 18.9                               | 19.1                   |
| -OH            | -                                  | 3.62, br s                         | -                          | -                                 | -                                  | -                      |

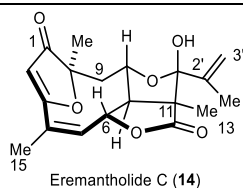

<sup>13</sup> Sass, D. C., Heleno, V. C. G., Cavalcante, S., da Silva Barbosa, J., Soares, A. C. F., Constantino, M. G. J. *Org. Chem.* **2012**, *77*, 9374–9378.

<sup>14</sup> Heleno, V. C. G., de Oliveira, K. T., Lopes, J. L. C., Lopes, N. P., Ferreira, A. G. *Magn. Reson. Chem.* **2008**, *46*, 576-581.

**Table S14.** Comparison of natural and synthetic 5-*epi*-isogoyazensolide (**15**) (CDCl<sub>3</sub>)

| 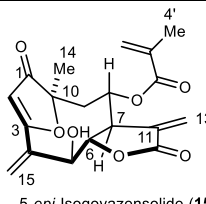<br>5- <i>epi</i> -isogoyazensolide ( <b>15</b> ) |                                                                                     |                                                                                     |                                    |                        |
|------------------------------------------------------------------------------------------------------------------------------------|-------------------------------------------------------------------------------------|-------------------------------------------------------------------------------------|------------------------------------|------------------------|
|                                                                                                                                    | <b><sup>1</sup>H NMR</b>                                                            |                                                                                     | <b><sup>13</sup>C NMR</b>          |                        |
|                                                                                                                                    | Natural <sup>15</sup><br>(270 MHz)                                                  | Synthetic<br>(400 MHz)                                                              | Natural <sup>16</sup><br>(100 MHz) | Synthetic<br>(100 MHz) |
| 1                                                                                                                                  | -                                                                                   | -                                                                                   | 203.7                              | 203.8                  |
| 2                                                                                                                                  | 5.97, s                                                                             | 5.96, s                                                                             | 106.5                              | 106.5                  |
| 3                                                                                                                                  | -                                                                                   | -                                                                                   | 185.2                              | 185.2                  |
| 4                                                                                                                                  | -                                                                                   | -                                                                                   | 137.3                              | 137.1                  |
| 5                                                                                                                                  | 4.69, ddd (9.5, 2, 2)                                                               | 4.67, dt (9.6, 2.2)                                                                 | 74.0                               | 73.9                   |
| 6                                                                                                                                  | 4.60, dd (9.5, 5)                                                                   | 4.60, dd (9.6, 6)                                                                   | 85.0                               | 85.0                   |
| 7                                                                                                                                  | 3.66, dddd (5, 2, 3.5, 3)                                                           | 3.66, m                                                                             | 51.2                               | 51.1                   |
| 8                                                                                                                                  | 4.39, ddd (2, 11.5, 2)                                                              | 4.37, dt (12, 1.8)                                                                  | 70.6                               | 70.5                   |
| 9 $\alpha$                                                                                                                         | 2.50, dd (13, 11.5)                                                                 | 2.50, dd (13.7, 11.9)                                                               | 45.2                               | 45.2                   |
| 9 $\beta$                                                                                                                          | 2.37, dd (13, 2)                                                                    | 2.37, dd (13.9, 1.7)                                                                | -                                  | -                      |
| 10                                                                                                                                 | -                                                                                   | -                                                                                   | 90.2                               | 90.2                   |
| 11                                                                                                                                 | -                                                                                   | -                                                                                   | <b>133.0</b>                       | <b>132.8</b>           |
| 12                                                                                                                                 | -                                                                                   | -                                                                                   | 167.6                              | 167.6                  |
| 13a                                                                                                                                | 6.28, d (3.5)                                                                       | 6.28, d (3.5)                                                                       | 124.7                              | 124.9                  |
| 13b                                                                                                                                | 5.57, d (3)                                                                         | 5.56, d (3.1)                                                                       | -                                  | -                      |
| 14                                                                                                                                 | 1.53 s                                                                              | 1.54, s                                                                             | 21.2                               | 21.2                   |
| 15a                                                                                                                                | 6.26, dd (2, 1)                                                                     | 6.25, dd (2.3, 0.9)                                                                 | 123.1                              | 123.3                  |
| 15b                                                                                                                                | 6.01, m                                                                             | 6.01, m                                                                             | -                                  | -                      |
| 1'                                                                                                                                 | -                                                                                   | -                                                                                   | 166.8                              | 166.8                  |
| 2'                                                                                                                                 | -                                                                                   | -                                                                                   | <b>135.4</b>                       | <b>135.3</b>           |
| 3'a                                                                                                                                | 6.01, m                                                                             | 6.01, m                                                                             | 126.6                              | 126.7                  |
| 3'b                                                                                                                                | 5.56, br s                                                                          | 5.55, m                                                                             | -                                  | -                      |
| 4'                                                                                                                                 | 1.83, br s                                                                          | 1.83, dd (1.6, 1)                                                                   | 17.9                               | 18.0                   |
| <b>2D NMR correlations</b>                                                                                                         |                                                                                     |                                                                                     |                                    |                        |
|                                                                                                                                    | <b><sup>1</sup>H-<sup>1</sup>H COSY</b>                                             | <b>HMBC</b>                                                                         |                                    |                        |
| <b>15</b>                                                                                                                          |  |  |                                    |                        |

<sup>15</sup> Bohlmann, F., Zdero, C., Robinson, H., King, R. M. *Phytochemistry*, **1981**, *20*, 731-734.

<sup>16</sup> Lopes, J. L. C. *J. Braz. Chem. Soc.* **1995**, *6*, 307-311. In this manuscript the chemical shift for protons 11 and 2' were wrongly assigned and they should have been swapped.

**Table S15.** Comparison of natural and synthetic tagitinin F (**16**) (CDCl<sub>3</sub>)<sup>17</sup>

| 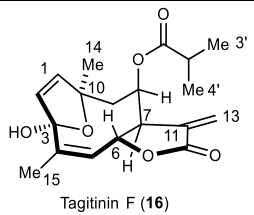<br>Tagitinin F ( <b>16</b> ) |                                                                                     |                                                                                     |                                                                                       |                        |
|----------------------------------------------------------------------------------------------------------------|-------------------------------------------------------------------------------------|-------------------------------------------------------------------------------------|---------------------------------------------------------------------------------------|------------------------|
|                                                                                                                | <sup>1</sup> H NMR                                                                  |                                                                                     | <sup>13</sup> C NMR                                                                   |                        |
|                                                                                                                | Natural<br>(300 MHz)                                                                | Synthetic<br>(400 MHz)                                                              | Authentic sample<br>(100 MHz)                                                         | Synthetic<br>(100 MHz) |
| 1                                                                                                              | 5.81, d (6)                                                                         | 5.81, (d, 5.5)                                                                      | 127.9                                                                                 | 127.9                  |
| 2                                                                                                              | 6.31, d (6)                                                                         | 6.33, (d, 5.7)                                                                      | 139.6                                                                                 | 139.6                  |
| 3                                                                                                              | -                                                                                   | -                                                                                   | 108.5                                                                                 | 108.5                  |
| 4                                                                                                              | -                                                                                   | -                                                                                   | 139.5                                                                                 | 139.5                  |
| 5                                                                                                              | 5.69, m                                                                             | 5.68, m                                                                             | 131.3                                                                                 | 131.3                  |
| 6                                                                                                              | 5.90, dd (5, 3)                                                                     | 5.91, dh (6.1, 1.3)                                                                 | 74.7                                                                                  | 74.7                   |
| 7                                                                                                              | 3.42, ddd (2.5, 2, 1)                                                               | 3.42, m                                                                             | 48.0                                                                                  | 48.0                   |
| 8                                                                                                              | 5.08, t (5, 4)                                                                      | 5.08, td, (3.6, 0.9)                                                                | 76.6                                                                                  | 76.6                   |
| 9 $\alpha$                                                                                                     | 2.36, dd (15, 4)                                                                    | 2.36, dd (16.2, 3.9)                                                                | 43.9                                                                                  | 43.9                   |
| 9 $\beta$                                                                                                      | 2.28, dd (15, 5)                                                                    | 2.28, dd (16.2, 3.3)                                                                | -                                                                                     | -                      |
| 10                                                                                                             | -                                                                                   | -                                                                                   | 87.2                                                                                  | 87.2                   |
| 11                                                                                                             | -                                                                                   | -                                                                                   | 139.0                                                                                 | 139.0                  |
| 12                                                                                                             | -                                                                                   | -                                                                                   | 169.7                                                                                 | 169.7                  |
| 13a                                                                                                            | 6.30, d (2.5)                                                                       | 6.35, d (2.9)                                                                       | 124.3                                                                                 | 124.3                  |
| 13b                                                                                                            | 5.69, d (2)                                                                         | 5.67, d (2.5)                                                                       | -                                                                                     | -                      |
| 14                                                                                                             | 1.41, s                                                                             | 1.40, s                                                                             | 31.8                                                                                  | 31.8                   |
| 15                                                                                                             | 1.93, t (1.5)                                                                       | 1.93, t (1.5)                                                                       | 20.8                                                                                  | 20.8                   |
| 1'                                                                                                             | -                                                                                   | -                                                                                   | 175.9                                                                                 | 175.9                  |
| 2'                                                                                                             | 2.49, hept (7.2)                                                                    | 2.50, hept (7)                                                                      | 34.4                                                                                  | 34.4                   |
| 3'                                                                                                             | 1.11, d (7.2)                                                                       | 1.11, d (7)                                                                         | 19.1                                                                                  | 19.1                   |
| 4'                                                                                                             | 1.13, d (7.2)                                                                       | 1.13, d (7)                                                                         | 18.9                                                                                  | 18.9                   |
| <b>2D NMR correlations</b>                                                                                     |                                                                                     |                                                                                     |                                                                                       |                        |
|                                                                                                                | <sup>1</sup> H- <sup>1</sup> H COSY                                                 | HMBC                                                                                | NOESY                                                                                 |                        |
| <b>16</b>                                                                                                      |  |  |  |                        |

<sup>17</sup> Fernandes, V. H. C. Viera, N. B. Zanini, L. B. L. Silva, A. F. Salem, P. P. O. Soares, M. G. Nicacio, K. J. de Paula, A. C. C. Virtuoso, L. S. Oliveira, T. B. Silva, E. O. Dias, D. F. Chagas-Paula, D. A. *Photochem. Photobiol.* **2020**, *96*, 14-20.

**Table S16.** Comparison of natural and synthetic tagitinin C (**17**) (CDCl<sub>3</sub>)

| 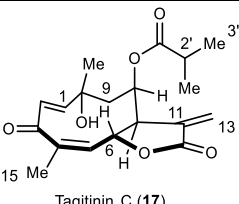<br>Tagitinin C ( <b>17</b> ) |                                                                                     |                                                                                     |                                                                                      |                                   |                        |
|----------------------------------------------------------------------------------------------------------------|-------------------------------------------------------------------------------------|-------------------------------------------------------------------------------------|--------------------------------------------------------------------------------------|-----------------------------------|------------------------|
|                                                                                                                | <b><sup>1</sup>H NMR</b>                                                            |                                                                                     |                                                                                      | <b><sup>13</sup>C NMR</b>         |                        |
|                                                                                                                | Natural <sup>17</sup><br>(500 MHz)                                                  | Natural <sup>18</sup><br>(270 MHz)                                                  | Synthetic<br>(500 MHz)                                                               | Natural <sup>18</sup><br>(68 MHz) | Synthetic<br>(125 MHz) |
| 1                                                                                                              | 6.94, (d, 17.1)                                                                     | 6.94, (d, 17)                                                                       | 6.91, (d, 17.1)                                                                      | 160.49                            | 159.88                 |
| 2                                                                                                              | 6.26, (d, 17.1)                                                                     | 6.26, (d, 17)                                                                       | 6.24, (d, 17.1)                                                                      | 129.57                            | 129.72                 |
| 3                                                                                                              | -                                                                                   | -                                                                                   | -                                                                                    | 196.85                            | 196.57                 |
| 4                                                                                                              | -                                                                                   | -                                                                                   | -                                                                                    | 138.84                            | 138.96                 |
| 5                                                                                                              | 5.87, like d (9)                                                                    | 5.88, br d (10)                                                                     | 5.87, br d (9.5)                                                                     | 137.14                            | 137.15                 |
| 6                                                                                                              | 5.41, like d (9)                                                                    | 5.42, br d (10)                                                                     | 5.39, br d (9.1)                                                                     | 76.05                             | 75.93                  |
| 7                                                                                                              | 3.54, m                                                                             | 3.55, m                                                                             | 3.53, m                                                                              | 47.05                             | 47.06                  |
| 8                                                                                                              | 5.37, m                                                                             | 5.33, m                                                                             | 5.36, m                                                                              | 74.11                             | 73.73                  |
| 9 $\alpha$                                                                                                     | 2.49                                                                                | ~2.4                                                                                | 2.46                                                                                 | 48.37                             | 48.47                  |
| 9 $\beta$                                                                                                      | 2.02                                                                                | ~2                                                                                  | 2.01, dd (14.4, 4.5)                                                                 | -                                 | -                      |
| 10                                                                                                             | -                                                                                   | -                                                                                   | -                                                                                    | 71.91                             | 72.18                  |
| 11                                                                                                             | -                                                                                   | -                                                                                   | -                                                                                    | 136.11                            | 136.00                 |
| 12                                                                                                             | -                                                                                   | -                                                                                   | -                                                                                    | 169.75                            | 169.58                 |
| 13a                                                                                                            | 6.34, d (1.5)                                                                       | 6.36, d (2)                                                                         | 6.36, d (1.8)                                                                        | 124.43                            | 124.49                 |
| 13b                                                                                                            | 5.81, d (1.5)                                                                       | 5.81, d (2)                                                                         | 5.80, d (1.7)                                                                        | -                                 | -                      |
| 14                                                                                                             | 1.53, s                                                                             | 1.56                                                                                | 1.54, s                                                                              | 28.88                             | 29.16                  |
| 15                                                                                                             | 1.95, like s                                                                        | 1.97, br                                                                            | 1.96, br s                                                                           | 19.65                             | 19.69                  |
| 1'                                                                                                             | -                                                                                   | -                                                                                   | -                                                                                    | 176.18                            | 176.06                 |
| 2'                                                                                                             | 2.42, m                                                                             | 2.44, m                                                                             | 2.43, m                                                                              | 34.06                             | 34.03                  |
| 3'                                                                                                             | 1.07, d (4.5)                                                                       | 1.10, d (7.1)                                                                       | 1.08, d (7)                                                                          | 18.80                             | 18.81                  |
| 4'                                                                                                             | 1.05, d (4.5)                                                                       | 1.08, d (7.1)                                                                       | 1.06, d (7)                                                                          | 18.64                             | 18.62                  |
| <b>2D NMR correlations</b>                                                                                     |                                                                                     |                                                                                     |                                                                                      |                                   |                        |
|                                                                                                                | <b><sup>1</sup>H-<sup>1</sup>H COSY</b>                                             | <b>HMBC</b>                                                                         | <b>NOESY</b>                                                                         |                                   |                        |
| <b>17</b>                                                                                                      |  |  |  |                                   |                        |

<sup>18</sup> Baruah, N. C., Sharma, R. P., Madhusudanan, K. P., Thyagarajan, G., Herz, W., Murari, R. *J. Org. Chem*, **1979**, *44*, 1831-1835.



## f) Experimental procedures for Scheme 1

**Figure S4.** Synthesis of **20a** from commercially available 3-butyn-1-ol (**S4-1**).

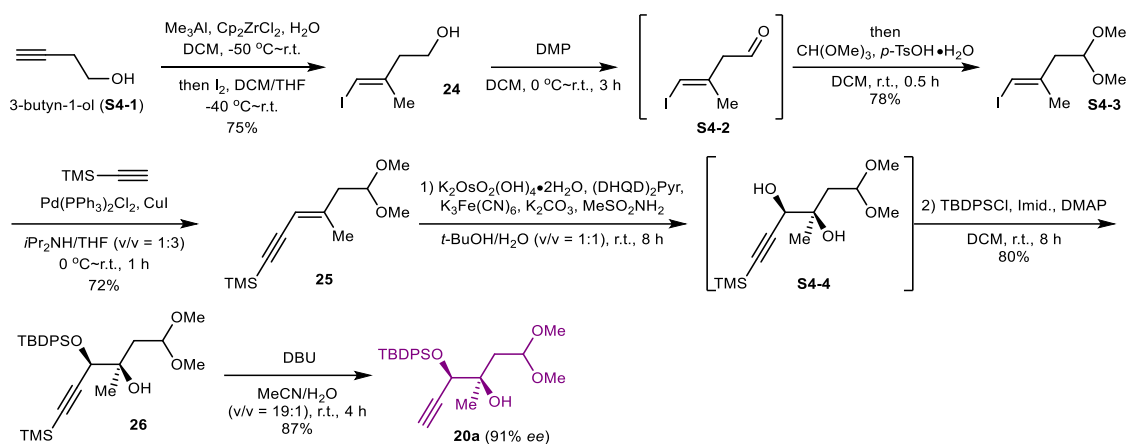

Vinyl iodide **24** was prepared from commercially available 3-butyn-1-ol using a carboalumination /iodination process.<sup>19</sup> The reaction can be ran in a decagram scale and the product can be used in the next step without further purification.

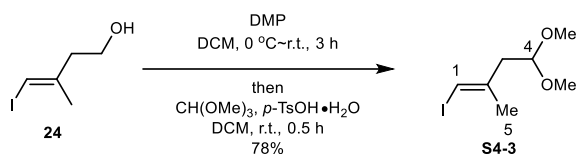

To a  $0^\circ\text{C}$  solution of alcohol **24** (~132 mmol) in  $\text{CH}_2\text{Cl}_2$  (250 mL) Dess–Martin periodinane (DMP, 56 g, 132 mmol) was slowly added in portions. The mixture was stirred at room temperature for 3 hours, till TLC analysis showed disappearance of starting material (aldehyde,  $R_f = 0.60$ , Pentane/Ethyl acetate = 5/1). Then, the mixture was cooled down again to  $0^\circ\text{C}$  and a catalytic amount of  $p\text{-TsOH}\cdot\text{H}_2\text{O}$  (1.0 g) was added, followed by addition of  $\text{CH}(\text{OMe})_3$  (21.6 mL, 198 mmol). The reaction mixture was allowed to warm to room temperature and stirred for 30 minutes. the mixture was then quenched with saturated aqueous  $\text{NH}_4\text{Cl}$  and  $\text{Na}_2\text{SO}_3$ (v/v = 1:1, 500 mL) and extracted with  $\text{CH}_2\text{Cl}_2$  ( $3 \times 500$  mL). The combined organic layers were washed with brine (500 mL), dried over  $\text{Na}_2\text{SO}_4$ , then filtered and concentrated *in vacuo*. The residue was purified on silica gel chromatography (Pentane/Ethyl acetate = 30/1) to provide the **S4-3** as yellow oil (26.4 g, 78%).

Data of vinyl iodide **S4-3**: yellow oil;

$^1\text{H}$  NMR (400 MHz,  $\text{CDCl}_3$ )  $\delta$  6.02 (m, 1H,  $H_1$ ), 4.47 (t,  $J = 5.7$  Hz, 1H,  $H_4$ ), 3.32 (s, 6H, -OMe), 2.50 (dd,  $J = 5.7, 1.0$  Hz, 2H,  $H_3$ ), 1.88 (d,  $J = 1.1$  Hz, 3H,  $H_5$ ) ppm;

$^{13}\text{C}$  NMR (100 MHz,  $\text{CDCl}_3$ )  $\delta$  143.4 ( $C_2$ ), 102.9 ( $C_4\text{H}$ ), 77.8 ( $C_1\text{H}$ ), 53.1 (-OMe), 42.5 ( $C_3\text{H}_2$ ), 24.6 ( $C_5\text{H}_3$ ) ppm;

IR (film,  $\text{cm}^{-1}$ ) 2931, 1729, 1118, 1072;

TLC:  $R_f = 0.40$ , Pentane/Ethyl acetate = 25/1).

<sup>19</sup> Prasad, K. R., Pawar, A. B. *Org Lett.*, **2011**, *13*, 4252-4255.

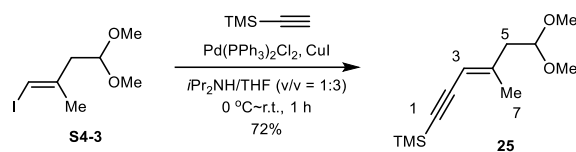

To a stirred solution of vinyl iodide **S4-3** (20.8 g, 81 mmol) in THF/*i*-Pr<sub>2</sub>NH (150 mL/50 mL) was added trimethylsilyl acetylene (13.5 mL, 97.5 mmol) at 0 °C. Then Pd(PPh<sub>3</sub>)<sub>2</sub>Cl<sub>2</sub> (2.8 g, 4.05 mmol) and CuI (1.54 g, 8.1 mmol) were added at the same temperature. The reaction mixture was allowed to reach room temperature and stirred for 1 hour till TLC analysis showed disappearance of starting material. Then, pentane (800 mL) was added to the reaction mixture, stirred for 30 minutes, the mixture was filtered and the solution washed with saturated aqueous NH<sub>4</sub>Cl (200 mL). The aqueous phase was extracted with CH<sub>2</sub>Cl<sub>2</sub> (2 × 100 mL). The combined organic layers were dried over Na<sub>2</sub>SO<sub>4</sub>, then filtered and concentrated *in vacuo*. The residue was purified on silica gel chromatography (Pentane/Ethyl acetate = 50/1 ~ 25/1) to provide the **25** as light-yellow oil (13.3 g, 72%).

Data of vinyl iodide **25**: light-yellow oil;

<sup>1</sup>H NMR (400 MHz, CDCl<sub>3</sub>) δ 5.38 (m, 1H, *H*<sub>3</sub>), 4.47 (t, *J* = 5.7 Hz, 1H, *H*<sub>6</sub>), 3.30 (s, 6H, -OMe), 2.37 (d, *J* = 5.8 Hz, 2H, *H*<sub>5</sub>), 1.94 (d, *J* = 0.8 Hz, 3H, *H*<sub>7</sub>), 0.18 (s, 9H, -TMS) ppm;

<sup>13</sup>C NMR (100 MHz, CDCl<sub>3</sub>) δ 148.9 (*C*<sub>4</sub>), 107.9 (*C*<sub>6</sub>H), 103.2 (*C*<sub>2</sub>), 103.1 (*C*<sub>3</sub>H), 97.6 (*C*<sub>1</sub>), 52.9 (-OMe), 41.8 (*C*<sub>5</sub>H<sub>2</sub>), 20.2 (*C*<sub>7</sub>H<sub>3</sub>), 0.2 (-TMS) ppm;

IR (film, cm<sup>-1</sup>) 2957, 2135, 1249, 1120, 1064, 838, 509;

HRMS(ESI) [M + H]<sup>+</sup> calculated for C<sub>12</sub>H<sub>23</sub>O<sub>2</sub>Si: 227.1467, found: 227.1250;

TLC: R<sub>f</sub> = 0.30 (Pentane/Ethyl acetate = 25/1).

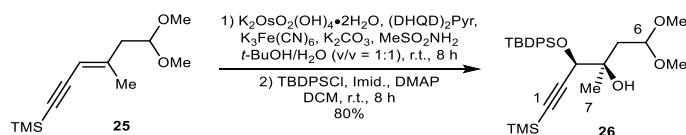

A 500 mL round bottom flask equipped with a magnetic stir bar was charged with K<sub>2</sub>OsO<sub>2</sub>(OH)<sub>2</sub>·2H<sub>2</sub>O (320 mg, 0.9 mmol), (DHQD)<sub>2</sub>Pyr (1.2 g, 1.36 mmol), K<sub>3</sub>Fe(CN)<sub>6</sub> (44.6 g, 136 mmol), K<sub>2</sub>CO<sub>3</sub> (18.8 g, 136 mmol) and *t*-BuOH/H<sub>2</sub>O (100 mL/100 mL). The biphasic mixture was stirred at room temperature for 30 minutes, then MeSO<sub>2</sub>NH<sub>2</sub> (4.8 g, 50.5 mmol) was added and the mixture was stirred for another 30 minutes. Enyne **25** (10.2 g, 45 mmol) was added to the AD-mix-β mixture and stirred at room temperature for 8 hours. The reaction was followed by NMR analysis till disappearance of the starting material. The reaction slurry was filtered and the filtrate was extracted with CH<sub>2</sub>Cl<sub>2</sub> (4 × 100 mL). The combined organic layers were dried over Na<sub>2</sub>SO<sub>4</sub>, filtered, concentrated *in vacuo* and then used directly for silyl protection without further purification. The crude product was dissolved in CH<sub>2</sub>Cl<sub>2</sub> (300 mL) and imidazole (7.7 g, 113 mmol) was added. Then TBDPSCl (21 mL, 81 mmol) was added dropwise together with a catalytic amount of DMAP (100 mg). The reaction mixture was then stirred at room temperature for 8 hours or till the TLC analysis showed disappearance of starting material. Then, the mixture was quenched with water (100 mL) and extracted with CH<sub>2</sub>Cl<sub>2</sub> (2 × 200 mL). The combined organic layers were washed with brine (500 mL), dried over Na<sub>2</sub>SO<sub>4</sub>, then filtered and concentrated *in vacuo*. The residue was purified on silica gel chromatography (Pentane/Ethyl acetate = 15/1 ~ 5/1) to provide the **26** as a colorless oil (18 g, 80%).

The enantiomers were found not to be separated by chiral HPLC using various columns under different conditions. The *ee* value was confirmed after TMS deprotection.

Data of alcohol **26**: Colorless oil;

$[\alpha]_D^{20}$  -53.0 (c 1.0, CHCl<sub>3</sub>);

<sup>1</sup>H NMR (400 MHz, CDCl<sub>3</sub>) δ 7.74-7.68 (m, 4H, -*TBDPS*), 7.45-7.32 (m, 6H, -*TBDPS*), 4.69 (t, *J* = 5.6 Hz, 1H, *H*<sub>6</sub>), 4.18 (s, 1H, *H*<sub>3</sub>), 3.29 (s, 3H, -*OMe*), 3.28 (s, 3H, -*OMe*), 2.05 (dd, *J* = 14.4, 5.2 Hz, 1H, *H*<sub>5</sub>), 1.88 (dd, *J* = 14.8, 6 Hz, 1H, *H*<sub>5</sub>), 1.31 (s, 3H, *H*<sub>7</sub>), 1.07 (s, 9H, -*TBDPS*), -0.01 (s, 9H, -*TMS*) ppm;

<sup>13</sup>C NMR (100 MHz, CDCl<sub>3</sub>) δ 136.4 (*TBDPS*), 136.3 (*TBDPS*), 133.7 (*TBDPS*), 133.0 (*TBDPS*), 130.0 (*TBDPS*), 129.7 (*TBDPS*), 127.7 (*TBDPS*), 127.4 (*TBDPS*), 104.4 (*C*<sub>2</sub>), 102.4 (*C*<sub>6</sub>H), 92.1 (*C*<sub>1</sub>), 73.8 (*C*<sub>4</sub>), 71.7 (*C*<sub>3</sub>H), 53.1 (-*OMe*), 53.0 (-*OMe*), 39.5 (*C*<sub>5</sub>H<sub>2</sub>), 27.2 (*TBDPS*), 23.6 (*C*<sub>7</sub>H<sub>3</sub>), 19.6 (*TBDPS*), -0.3 (*TMS*) ppm;

IR (film, cm<sup>-1</sup>) 2957, 1719, 1428, 1250, 1111, 843, 701;

HRMS(ESI) [M + Na]<sup>+</sup> calculated for [C<sub>28</sub>H<sub>42</sub>NaO<sub>4</sub>Si<sub>2</sub>]<sup>+</sup>: 521.2514, found: 521.2520;

TLC: R<sub>f</sub> = 0.50 (Pentane/Ethyl acetate = 10/1).

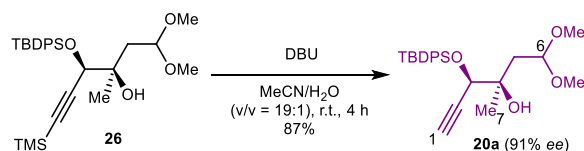

To a stirred solution of TMS alkyne **26** (18 g, 36 mmol) in MeCN/H<sub>2</sub>O (90 mL/5 mL) was added DBU (8.1 mL, 54 mmol) at room temperature. The reaction mixture was stirred for 4 hours or till the TLC analysis showed disappearance of starting material. The reaction mixture was concentrated *in vacuo*. The residue was purified on silica gel chromatography (Pentane/Ethyl acetate = 20/1 ~ 3/1) to provide the alkyne **20a** as colorless oil (13.3 g, 87%).

Chiral HPLC analysis of **20a**: chiral stationary column: AD-H, mobile phase: *n*-hexane/*i*-PrOH = 99:1, 1.0 mL/min, 210 nm, 30 °C, *t*<sub>R</sub> (major) = 12.80 min, *t*<sub>R</sub> (minor) = 11.05 minutes. The result indicated 91% *ee*. See **Supplementary Section k** for details.

Data of alkyne **20a**: colorless oil;

$[\alpha]_D^{20}$  -39.8 (c 0.19, CHCl<sub>3</sub>);

<sup>1</sup>H NMR (400 MHz, CDCl<sub>3</sub>) δ 7.79-7.67 (m, 4H, -*TBDPS*), 7.46-7.33 (m, 6H, -*TBDPS*), 4.66 (t, *J* = 5.7 Hz, 1H, *H*<sub>6</sub>), 4.22 (d, *J* = 2.2 Hz, 1H, *H*<sub>3</sub>), 3.28 (s, 3H, -*OMe*), 3.27 (s, 3H, -*OMe*), 3.07 (s, 1H, -*OH*), 2.26 (d, *J* = 2.2 Hz, 1H, *H*<sub>1</sub>), 2.06 (dd, *J* = 14.4, 6 Hz, 1H, *H*<sub>5</sub>), 1.89 (dd, *J* = 14.5, 5.5 Hz, 1H, *H*<sub>5</sub>), 1.31 (s, 3H, *H*<sub>7</sub>), 1.10 (d, *J* = 2.9 Hz, 9H, -*TBDPS*) ppm;

<sup>13</sup>C NMR (100 MHz, CDCl<sub>3</sub>) δ 136.4 (*TBDPS*), 136.3 (*TBDPS*), 133.3 (*TBDPS*), 132.9 (*TBDPS*), 130.1 (*TBDPS*), 129.9 (*TBDPS*), 127.8 (*TBDPS*), 127.4 (*TBDPS*), 102.3 (*C*<sub>6</sub>H), 82.6 (*C*<sub>2</sub>), 75.1 (*C*<sub>1</sub>), 73.8 (*C*<sub>10</sub>), 71.0 (*C*<sub>3</sub>H), 53.2 (-*OMe*), 52.9 (-*OMe*), 39.3 (*C*<sub>5</sub>H<sub>2</sub>), 27.2 (*TBDPS*), 23.6 (*C*<sub>7</sub>H<sub>3</sub>) ppm;

IR (film, cm<sup>-1</sup>) 3501, 2933, 1427, 1107, 1092, 700;

HRMS(ESI) [M + Na]<sup>+</sup> calculated for [C<sub>25</sub>H<sub>34</sub>NaO<sub>4</sub>Si]<sup>+</sup>: 449.2119, found: 449.2124;

TLC: R<sub>f</sub> = 0.50 (Pentane/Ethyl acetate = 7/1).

### Figure S5. Synthesis of **27** from 2-butyne-1-ol (**S5-1**)

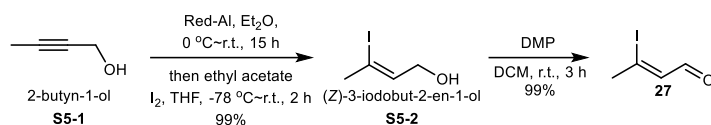

Aldehyde **27** was prepared from commercially available 2-butyne-1-ol (**S5-1**) in 2 steps using a carboalumination / iodination then modified DMP oxidation process. All spectroscopic and spectrometric analyses were in agreements with the literature accordingly for allylic alcohol (Z)-3-iodobut-2-en-1-ol (**S5-2**)<sup>20</sup> and aldehyde **27**.<sup>21</sup>

Modified DMP oxidation: To a stirred solution of crude allylic alcohol **S5-2** (~ 42 g, 212 mmol) in CH<sub>2</sub>Cl<sub>2</sub> (400 mL) was added DMP (90 g, 212 mmol) in portions at 0 °C. The reaction was monitored by TLC until no starting material remained (2 hours). Then pentane (1.2 L) was added to the reaction and stirred at room temperature for 30 minutes. The white precipitate was filtered off and the resulting colorless solution was concentrated *in vacuo* to give a yellow to brown oil **27** (~ 42 g) which was used directly for Barbier reaction without any further purification.

### Figure S6. Synthesis of **28**

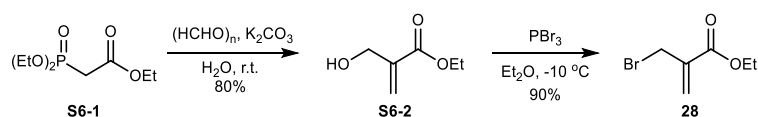

Allylic bromide **28** is known compound and was prepared in 2 steps including Baylis–Hillman reaction<sup>22</sup> and bromination<sup>23</sup> from triethyl phosphonoacetate (**S6-1**). All spectroscopic and spectrometric analyses were in agreements with the literature accordingly.

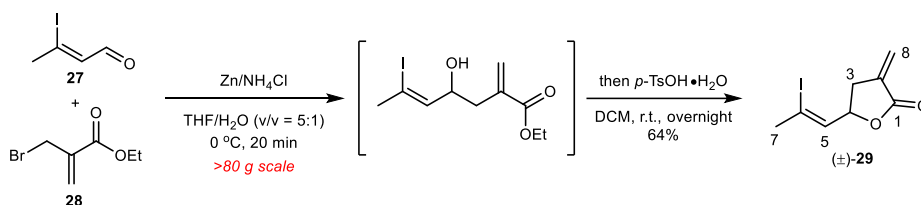

A 2.5 L round bottom flask equipped with a magnetic stir bar was charged with aldehyde **27** (82 g, 418 mmol), allylic bromide **28** (121 g, 627 mmol), THF (800 mL) and NH<sub>4</sub>Cl saturated solution (160 mL). The yellow bi-phasic mixture turned colorless and was cooled down to 0 °C. Then Zn (54 g, 836 mmol) was added in small portions within 30 minutes (caution the reaction is very exothermic). The reaction mixture was stirred at 0 °C for 20 minutes or till the TLC analysis showed disappearance of the starting material. The reaction mixture was filtered, the filtrate was concentrated *in vacuo* and redissolved

<sup>20</sup> Dakoji, S.; Li, D.; Agnihotri, G.; Zhou, H.; Liu, H. *J. Am. Chem. Soc.* **2001**, *123*, 9749-9759.

<sup>21</sup> Meyer, C.; Marek, I.; Normant, J. F. *Synlett.* **1993**, *6*, 386-388.

<sup>22</sup> Patil, S.; Chen, L.; Tanko, J. M. *Eur. J. Org. Chem.* **2014**, *3*, 502-505.

<sup>23</sup> Li, Y.; Zhang, J.; Li, D.; Chen, Y. *Org. Lett.* **2018**, *20*, 3296-3299.

in CH<sub>2</sub>Cl<sub>2</sub> (800 mL). The organic layer was washed with water (200 mL) and brine (200 mL), dried over Na<sub>2</sub>SO<sub>4</sub>, filtered, concentrated *in vacuo* and used directly for cyclization without further purification. The crude product was dissolved in CH<sub>2</sub>Cl<sub>2</sub> (500 mL) and a catalytic amount *p*-TsOH•H<sub>2</sub>O (1.0 g) was added. The reaction mixture was stirred at room temperature for 12 hours or till the TLC analysis showed disappearance of starting material. Then the mixture was washed with *sat. aq.* NaHCO<sub>3</sub> (100 mL), brine (100 mL), dried over Na<sub>2</sub>SO<sub>4</sub>, then filtered and concentrated *in vacuo*. The residue was purified on silica gel chromatography (Pentane/Ethyl acetate = 20/1 ~ 5/1) to provide the **29** as light-yellow oil (70.6 g, 64%).

Data of lactone **29**: light-yellow oil;

<sup>1</sup>H NMR (400 MHz, CDCl<sub>3</sub>) δ 6.25-6.20 (m, 1H, *H*<sub>8</sub>), 5.71 (dt, *J* = 7.6, 1.8 Hz, 1H, *H*<sub>5</sub>), 5.65 (q, *J* = 2.2 Hz, 1H, *H*<sub>8</sub>), 5.04 (dt, *J* = 9.8, 6.8 Hz, 1H, *H*<sub>4</sub>), 3.25 (ddt, *J* = 17.1, 7.7, 2.3 Hz, 1H, *H*<sub>3</sub>), 2.64 (ddtd, *J* = 17.2, 6.2, 3.0, 1.3 Hz, 1H, *H*<sub>3</sub>), 2.54 (d, *J* = 1.7 Hz, 3H, *H*<sub>7</sub>) ppm;

<sup>13</sup>C NMR (100 MHz, CDCl<sub>3</sub>) δ 170.0 (*C*<sub>1</sub>), 133.8 (*C*<sub>5</sub>H), 133.8 (*C*<sub>2</sub>), 122.6 (*C*<sub>8</sub>H<sub>2</sub>), 104.3 (*C*<sub>6</sub>), 81.3 (*C*<sub>4</sub>H), 33.8 (*C*<sub>7</sub>H<sub>3</sub>), 33.6 (*C*<sub>3</sub>H<sub>2</sub>) ppm; <sup>13</sup>C NMR of *C*<sub>2</sub> overlaps with *C*<sub>5</sub>;

IR (film, cm<sup>-1</sup>) 1765, 1242, 1116, 1016;

HRMS(ESI) [*M* + *H*]<sup>+</sup> calculated for C<sub>8</sub>H<sub>10</sub>IO<sub>2</sub>: 264.9725, found: 264.9709;

TLC: R<sub>f</sub> = 0.60 (Pentane/Ethyl acetate = 5/1).

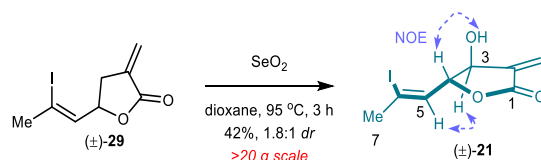

To a stirred solution of lactone **29** (22 g, 83 mmol) in dioxane (500 mL) was added SeO<sub>2</sub> (50 g, 450 mmol) in 3 portions at 95 °C within 2 hours. The reaction mixture was stirred at the same temperature for another hour and cooled down to room temperature. Then dioxane was evaporated and Et<sub>2</sub>O (800 mL) was added, stirred for 30 min, filtered and the solution was washed with saturated aqueous NaHCO<sub>3</sub> (100 mL), diluted Na<sub>2</sub>S (50 mL) and brine (100 mL). The organic phase was dried over Na<sub>2</sub>SO<sub>4</sub>, then filtered and concentrated *in vacuo*. The residue was purified on silica gel chromatography (Pentane/Ethyl acetate = 10/1 ~ 1/1) to provide the **21** as light-yellow oil (9.8 g, 42%).

Lactone **21** was obtained as a mixture of inseparable 1.8/1 diastereomers (determined by <sup>1</sup>H NMR). The structures were fully elucidated based on 2D NMR spectroscopic analyses, which indicated *trans* as the major product.

Data of lactone **21**: Light yellow oil;

IR (film, cm<sup>-1</sup>) 3420, 1753, 1250, 1129, 973;

HRMS(ESI) [*M* + *H*]<sup>+</sup> calculated for [C<sub>8</sub>H<sub>10</sub>IO<sub>3</sub>]<sup>+</sup>: 280.9669, found: 280.9675;

TLC: R<sub>f</sub> = 0.50 (Pentane/Ethyl acetate = 1/1);

**Major-trans**: <sup>1</sup>H NMR (400 MHz, CDCl<sub>3</sub>) δ 6.44 (d, *J* = 2.3 Hz, 1H, *H*<sub>8</sub>), 6.00 (d, *J* = 2.1 Hz, 1H, *H*<sub>8</sub>), 5.65 (dq, *J* = 8.0, 1.5 Hz, 1H, *H*<sub>5</sub>), 4.89 (ddd, *J* = 8.1, 4.5, 0.7 Hz, 1H, *H*<sub>4</sub>), 4.67 (ddt, *J* = 6.5, 4.4, 2.2 Hz, 1H), 2.89 (d, *J* = 6.1 Hz, 1H, -OH), 2.59 (dd, *J* = 1.6, 0.6 Hz, 3H, *H*<sub>7</sub>) ppm;

<sup>13</sup>C NMR (100 MHz, CDCl<sub>3</sub>) δ 168.5 (*C*<sub>1</sub>), 137.7 (*C*<sub>2</sub>), 131.3 (*C*<sub>5</sub>H), 126.6 (*C*<sub>8</sub>H<sub>2</sub>), 106.9 (*C*<sub>6</sub>), 88.7 (*C*<sub>4</sub>H), 73.7 (*C*<sub>3</sub>H), 34.2 (*C*<sub>7</sub>H<sub>3</sub>) ppm; <sup>13</sup>C NMR of *C*<sub>2</sub> of *cis* and *trans* are overlapped;

**Minor-cis:**  $^1\text{H}$  NMR (400 MHz,  $\text{CDCl}_3$ )  $\delta$  6.45 (d,  $J = 1.7$  Hz, 1H,  $H_8$ ), 6.04 (d,  $J = 1.5$  Hz, 1H,  $H_8$ ), 5.81 (dq,  $J = 7.5, 1.5$  Hz, 1H,  $H_5$ ), 5.06 (ddd,  $J = 7.5, 5.7, 0.8$  Hz, 1H,  $H_4$ ), 5.03-4.97 (m, 1H,  $H_3$ ), 2.63 (dd,  $J = 1.6, 0.6$  Hz, 3H,  $H_7$ ), 2.50 (d,  $J = 4.8$  Hz, 1H, -OH). ppm;  
 $^{13}\text{C}$  NMR (100 MHz,  $\text{CDCl}_3$ )  $\delta$  168.9 ( $C_1$ ), 137.7 ( $C_2$ ), 128.8 ( $C_5\text{H}$ ), 127.5 ( $C_8\text{H}_2$ ), 107.2 ( $C_6$ ), 86.4 ( $C_4\text{H}$ ), 69.1 ( $C_3\text{H}$ ), 34.3 ( $C_7\text{H}_3$ ) ppm;  $^{13}\text{C}$  NMR of  $C_2$  of cis and trans are overlapped.

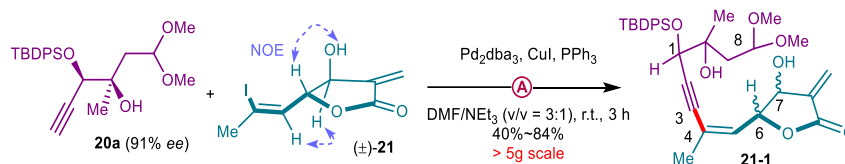

To a stirred solution at room temperature and under inert atmosphere of  $\text{N}_2$  of alkyne **20a** (8.0 g, 18.8 mmol) and vinyl iodide **21** (8.0 g, 28.6 mmol) in DMF/ $\text{NEt}_3$  (60 mL/10 mL) was added  $\text{PPh}_3$  (1.1 g, 4.2 mmol) followed by  $\text{Pd}_2\text{dba}_3$  (3.6 g, mmol) and  $\text{CuI}$  (0.6 g, mmol). The resulted mixture was stirred for 3 hours or till the TLC analysis showed disappearance of starting material. The reaction was then quenched by addition of *sat. aq.*  $\text{NH}_4\text{Cl}$  (100 mL) and extracted with ethyl acetate ( $3 \times 200$  mL). The combined organic layers were dried over  $\text{Na}_2\text{SO}_4$ , then filtered and concentrated *in vacuo*. The residue was purified on silica gel chromatography (Pentane/Ethyl acetate = 10/1  $\sim$  1/2) to provide enyne **21-1** as yellow oil (4.3 g, 40%). The reaction can be run from milligrams to a eight grams scale with yields varying from 40%  $\sim$  84% depending on the scale.

Enyne **21-1** was obtained as a complicated mixture of diastereomers and that could not be separated by conventional chromatographic techniques.

Data of enyne **21-1**: yellow oil;

$^1\text{H}$  NMR (300 MHz,  $\text{CDCl}_3$ )  $\delta$  7.75-7.69 (m, 4H), 7.50-7.31 (m, 6H), 6.39-6.37 (m, 1H), 6.02-5.80 (m, 1H), 5.59-5.54 (m, 0.88H), 5.26 (t,  $J = 9.3$  Hz, 0.13H), 5.08-4.77 (m, 1H), 4.75 - 4.61 (m, 1.27H), 4.56 (dd,  $J = 6.2, 4.5$  Hz, 0.23H), 4.48-4.46 (m, 0.56H), 4.37 (dd,  $J = 16.1, 4.2$  Hz, 1H), 4.00 (dd,  $J = 20.7, 6.8$  Hz, 0.44H), 3.32-3.26 (m, 6H), 2.45 (d,  $J = 4.9$  Hz, 0.24H), 2.31 (d,  $J = 4.8$  Hz, 0.27H), 2.22-1.85 (m, 2.5H), 1.73-1.62 (m, 2.5H), 1.39-1.29 (m, 3H), 1.14-1.05 (m, 9H) ppm;

$^{13}\text{C}$  NMR (75 MHz,  $\text{CDCl}_3$ )  $\delta$  175.2, 168.7, 136.2, 136.2, 136.1, 133.4, 132.6, 130.3, 129.9, 129.7, 129.6, 127.9, 127.6, 126.1, 102.8, 102.3, 94.6, 80.9, 80.5, 74.4, 74.2, 71.6, 53.7, 53.5, 53.1, 52.8, 39.4, 27.1, 27.0, 24.1, 22.9, 22.3, 19.6 ppm;

IR (film,  $\text{cm}^{-1}$ ) 3414, 2929, 2213, 1969, 1769, 1428, 1113, 824, 704;

HRMS(ESI)  $[\text{M} + \text{Na}]^+$  calculated for  $\text{C}_{33}\text{H}_{42}\text{NaO}_7\text{Si}$ : 601.2596, found: 601.2598;

TLC:  $R_f = 0.30$  (Pentane/Ethyl acetate = 1/1).

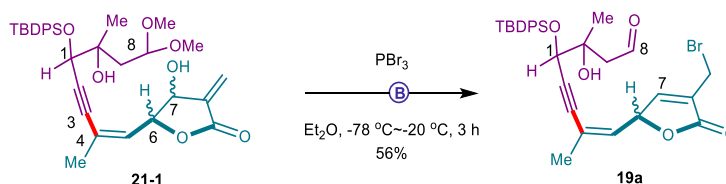

A 100 mL round bottom flask equipped with a magnetic stir bar was charged with enyne **21-1** (1.7 g, 2.9 mmol) and  $\text{Et}_2\text{O}$  (30 mL). The reaction mixture was cooled down to  $-78$   $^\circ\text{C}$  and  $\text{PBr}_3$  (0.7 mL, 7.35 mmol) was added. The temperature was allowed to rise to  $-20$

°C and stirred for 3 hours or till the TLC analysis showed disappearance of starting material. Then, the reaction was quenched with water (5.0 mL) and extracted with Et<sub>2</sub>O (3 × 50 mL). The combined organic layers were dried over Na<sub>2</sub>SO<sub>4</sub>, then filtered and concentrated *in vacuo*. The residue was purified on silica gel chromatography (Pentane/Ethyl acetate = 5/1 ~ 3/1) to provide bromolactone **19a** as colorless oil (0.98 g, 56%) as a 1:1 mixture of inseparable diastereomers.

Data of bromolactone **19a**: colorless oil;

IR (film, cm<sup>-1</sup>) 3482, 2933, 1764, 1428, 1110, 1077, 1040, 703;

HRMS(ESI) [M + H]<sup>+</sup> calculated for C<sub>31</sub>H<sub>36</sub>BrO<sub>5</sub>Si: 595.1510, found: 595.1516;

TLC: R<sub>f</sub> = 0.60 (Petroleum ether/Ethyl acetate = 2/1);

#### Diastereomer I:

<sup>1</sup>H NMR (400 MHz, CDCl<sub>3</sub>) δ 9.90 (m, 1H, H<sub>8</sub>), 7.75-7.67 (m, 4H, TBDPS), 7.49-7.35 (m, 6H, TBDPS), 7.00 (q, J = 1.4 Hz, 1H, H<sub>7</sub>), 5.24-5.16 (m, 2H, H<sub>5</sub>+H<sub>6</sub>), 4.47 (s, 1H, H<sub>1</sub>), 4.02-4.05 (m, 2H, H<sub>13</sub>), 2.77 (dd, J = 15.8, 2 Hz, 1H, H<sub>9</sub>), 2.69 (dd, J = 15.7, 2.8 Hz, 1H, H<sub>9</sub>), 1.67 (d, J = 0.8 Hz, 3H, H<sub>15</sub>), 1.47 (s, 3H, H<sub>14</sub>), 1.06 (s, 9H, TBDPS) ppm;

<sup>13</sup>C NMR (100 MHz, CDCl<sub>3</sub>) δ 201.81 (C<sub>8</sub>), 170.97 (C<sub>12</sub>), 151.03 (C<sub>7</sub>H), 136.13 (TBDPS), 135.98 (TBDPS), 133.12 (TBDPS), 131.65 (TBDPS), 130.75 (C<sub>11</sub>), 130.62 (TBDPS), 130.11 (TBDPS), 129.48 (C<sub>5</sub>H), 128.19 (TBDPS), 127.73 (TBDPS), 124.56 (C<sub>4</sub>), 94.20 (C<sub>2</sub>), 85.16 (C<sub>3</sub>), 79.64 (C<sub>6</sub>H), 74.71 (C<sub>10</sub>), 71.43 (C<sub>1</sub>H), 50.80 (C<sub>9</sub>H<sub>2</sub>), 26.94 (TBDPS), 23.66 (C<sub>14</sub>H<sub>3</sub>), 22.77 (C<sub>15</sub>H<sub>3</sub>), 20.83 (C<sub>13</sub>H<sub>2</sub>), 19.66 (TBDPS) ppm;

#### Diastereomer II:

<sup>1</sup>H NMR (400 MHz, CDCl<sub>3</sub>) δ 9.88 (m, 1H, H<sub>8</sub>), 7.75-7.67 (m, 4H, TBDPS), 7.49-7.35 (m, 6H, TBDPS), 6.65 (d, J = 1.3 Hz, 1H, H<sub>7</sub>), 5.24-5.16 (m, 2H, H<sub>5</sub>+H<sub>6</sub>), 4.47 (s, 1H, H<sub>1</sub>), 4.02-4.05 (m, 2H, H<sub>13</sub>), 2.76 (dd, J = 15.7, 2 Hz, 1H, H<sub>9</sub>), 2.66 (dd, J = 15.7, 2.8 Hz, 1H, H<sub>9</sub>), 1.65 (d, J = 1.4 Hz, 3H, H<sub>15</sub>), 1.46 (s, 3H, H<sub>14</sub>), 1.07 (s, 9H, TBDPS) ppm;

<sup>13</sup>C NMR (100 MHz, CDCl<sub>3</sub>) δ 201.8 (C<sub>8</sub>), 170.95 (C<sub>12</sub>), 150.84 (C<sub>7</sub>H), 136.03 (TBDPS), 135.91 (TBDPS), 132.91 (TBDPS), 132.05 (TBDPS), 130.87 (C<sub>11</sub>), 130.50 (TBDPS), 130.22 (TBDPS), 129.54 (C<sub>5</sub>H), 128.11 (TBDPS), 127.74 (TBDPS), 124.31 (C<sub>4</sub>), 94.36 (C<sub>2</sub>), 85.07 (C<sub>3</sub>), 79.64 (C<sub>6</sub>H), 74.80 (C<sub>10</sub>), 71.44 (C<sub>1</sub>H), 50.78 (C<sub>9</sub>H<sub>2</sub>), 27.00 (TBDPS), 23.71 (C<sub>14</sub>H<sub>3</sub>), 22.81 (C<sub>15</sub>H<sub>3</sub>), 20.97 (C<sub>13</sub>H<sub>2</sub>), 19.61 (TBDPS) ppm;

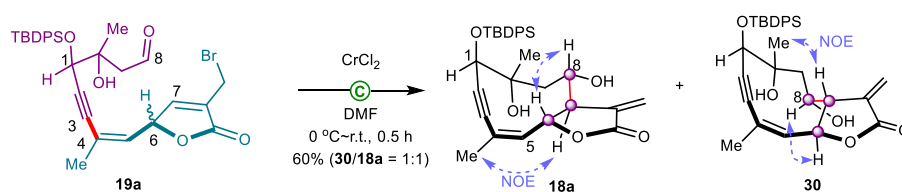

A 50 mL round bottom flask equipped with a magnetic stir bar was charged with bromolactone **19a** (1.03 g, 1.73 mmol) and DMF (10 mL). The reaction mixture was cooled down to 0 °C and CrCl<sub>2</sub> (532 mg, 4.3 mmol) was added. The temperature was allowed to rise to room temperature and stirred for 1 hour or till the TLC analysis showed disappearance of starting material. Then, the reaction was quenched with *sat. aq.* NH<sub>4</sub>Cl (20 mL) and extracted with ethyl acetate (3 × 50 mL). The combined organic layers were dried over Na<sub>2</sub>SO<sub>4</sub>, then filtered and concentrated *in vacuo*. The residue was purified on silica gel chromatography (Pentane/Ethyl acetate = 3/1 ~ 1/3) to provide **18a** as a waxy solid (272 mg, 30%) and **30** as a light yellow solid (270 mg, 30%).

The structures of **18a** and **30** were fully elucidated based on 2D NMR spectroscopic analyses. The absolute configuration of **30** was determined by X-ray diffraction. Single crystals of **30** suitable for X-ray crystallographic analysis were obtained by a single recrystallization at room temperature by slow evaporation using *n*-hexanes/CH<sub>2</sub>Cl<sub>2</sub> as solvent mixture. See **Supplementary Section m** for detail.

Data of **18a**: waxy solid;

$[\alpha]_D^{20}$  -130.2 (c 0.2, CHCl<sub>3</sub>);

<sup>1</sup>H NMR (400 MHz, CDCl<sub>3</sub>) δ 7.69 (ddd, *J* = 10.3, 8.1, 1.5 Hz, 4H, -OTBDPS), 7.47-7.31 (m, 6H, -OTBDPS), 6.36 (br s, 1H, H<sub>13</sub>), 5.86 (m, 1H, H<sub>5</sub>), 5.73 (br s, 1H, H<sub>13</sub>), 5.02 (dt, *J* = 3.7, 1.9 Hz, 1H, H<sub>6</sub>), 4.15 (s, 1H, H<sub>1</sub>), 3.92 (br s, 1H, H<sub>7</sub>), 3.88 (m, 1H, H<sub>8</sub>), 2.72 (br d, *J* = 15.3 Hz, 1H, H<sub>9</sub>), 2.07 (dd, *J* = 15.2, 6.1 Hz, 1H, H<sub>9</sub>), 1.61 (t, *J* = 1.8 Hz, 3H, H<sub>15</sub>), 1.41 (s, 3H, H<sub>14</sub>), 1.11 (s, 9H, -OTBDPS) ppm;

<sup>13</sup>C NMR (100 MHz, CDCl<sub>3</sub>) δ 170.3 (C<sub>12</sub>), 139.6 (C<sub>5</sub>H), 136.4 (TBDPS), 136.1 (TBDPS), 135.8 (C<sub>11</sub>), 133.2 (TBDPS), 133.0 (TBDPS), 130.13 (TBDPS), 130.05 (TBDPS), 127.8 (TBDPS), 127.5 (TBDPS), 125.7 (C<sub>13</sub>H<sub>2</sub>), 120.3 (C<sub>4</sub>), 99.4 (C<sub>2</sub>), 84.7 (C<sub>3</sub>), 79.5 (C<sub>6</sub>H), 77.5 (C<sub>10</sub>), 71.9 (C<sub>1</sub>H), 71.1 (C<sub>8</sub>H), 50.7 (C<sub>7</sub>H), 31.7 (C<sub>14</sub>H<sub>3</sub>), 27.2 (TBDPS), 20.9 (C<sub>15</sub>H<sub>3</sub>), 19.5 (TBDPS) ppm; Signal of C<sub>2</sub>/C<sub>3</sub>/C<sub>9</sub> could not be detected on <sup>13</sup>C NMR because of the conformational changes, the chemical shift of C<sub>2</sub> and C<sub>3</sub> were confirmed by HMBC, but the chemical shift of C<sub>8</sub> could not be confirmed by any 2D NMR. <sup>13</sup>C NMR of C<sub>10</sub> overlaps with the solvent peak, the chemical shift was confirmed by HMBC;

IR (film, cm<sup>-1</sup>) 3475, 2963, 1765, 1429, 1269, 1112, 823, 743, 703, 547;

HRMS(ESI) [M + H]<sup>+</sup> calculated for C<sub>31</sub>H<sub>37</sub>O<sub>5</sub>Si: 517.2417, found: 517.2410;

TLC: R<sub>f</sub> = 0.40 (Pentane/Ethyl acetate = 2/1).

Data of **30**: light yellow solid, m.p. = 124.4 - 125.8 °C;

$[\alpha]_D^{20}$  -86.6 (c 1.0, CHCl<sub>3</sub>);

<sup>1</sup>H NMR (400 MHz, CDCl<sub>3</sub>) δ 7.69-7.65 (m, 4H, -OTBDPS), 7.34-7.45 (m, 6H, -OTBDPS), 6.44 (d, *J* = 3.3 Hz, 1H, H<sub>13</sub>), 5.94 (dt, *J* = 2.6, 1.6 Hz, 1H, H<sub>5</sub>), 5.76 (d, *J* = 2.8 Hz, 1H, H<sub>13</sub>), 4.91 (dt, *J* = 6.8, 2.3 Hz, 1H, H<sub>6</sub>), 4.61-4.42 (m, 1H, H<sub>8</sub>), 4.23 (s, 1H, H<sub>1</sub>), 3.96-3.76 (m, 1H, H<sub>7</sub>), 2.54 (dd, *J* = 15.0, 7.6 Hz, 1H, H<sub>9</sub>), 1.91 (dd, *J* = 15.0, 3.0 Hz, 1H, H<sub>9</sub>), 1.58 (t, *J* = 1.8 Hz, 3H, H<sub>15</sub>), 1.44 (s, 3H, H<sub>14</sub>), 1.09 (s, 9H, -OTBDPS) ppm;

<sup>13</sup>C NMR (100 MHz, CDCl<sub>3</sub>) δ 169.5 (C<sub>12</sub>), 136.5 (C<sub>5</sub>H), 136.2 (TBDPS), 136.1 (TBDPS), 134.9 (C<sub>11</sub>), 133.2 (TBDPS), 132.6 (TBDPS), 130.3 (TBDPS), 130.1 (TBDPS), 128.0 (TBDPS), 127.6 (TBDPS), 123.3 (C<sub>13</sub>H<sub>2</sub>), 118.7 (C<sub>4</sub>), 95.9 (C<sub>2</sub>), 87.1 (C<sub>3</sub>), 80.3 (C<sub>6</sub>H), 75.8 (C<sub>10</sub>), 70.3 (C<sub>1</sub>H), 67.9 (C<sub>8</sub>H), 49.0 (C<sub>7</sub>H), 46.0 (C<sub>9</sub>H<sub>2</sub>), 27.2 (C<sub>14</sub>H<sub>3</sub>), 27.2 (TBDPS), 22.2 (C<sub>15</sub>H<sub>3</sub>), 19.6 (TBDPS) ppm; <sup>13</sup>C NMR of C<sub>14</sub> is overlap with TBDPS, the chemical shift is confirmed by HMBC.

IR (film, cm<sup>-1</sup>) 3475, 2963, 1765, 1429, 1269, 1112, 823, 743, 703, 547;

HRMS(ESI) [M + Na]<sup>+</sup> calculated for C<sub>31</sub>H<sub>36</sub>NaO<sub>5</sub>Si: 539.2236, found: 539.2230;

TLC: R<sub>f</sub> = 0.05 (Pentane/Ethyl acetate = 2/1).



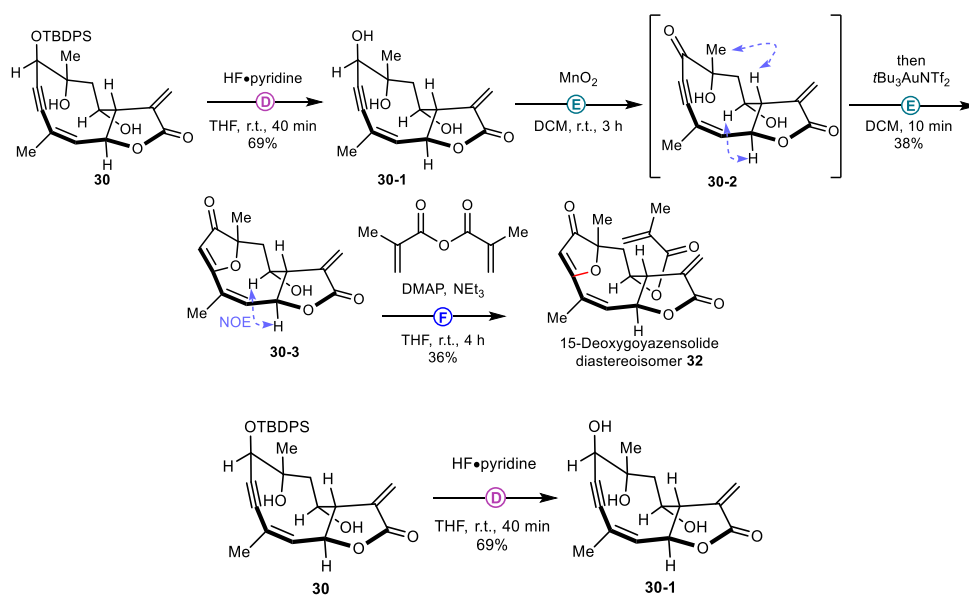

To a solution of TBDPS-protected alcohol **30** (50 mg, 0.097 mmol) in an Eppendorf safe-lock tube 1 drop of THF followed by hydrogen fluoride pyridine (hydrogen fluoride ~70%, 0.2 mL) were added. The reaction mixture was left on a shaker at room temperature for 40 minutes. Then, CH<sub>2</sub>Cl<sub>2</sub> (2.0 mL) was added and the reaction was quenched carefully with *sat. aq.* NaHCO<sub>3</sub> (caution the mixture bubbles out while quenching) until the evolution of gas stopped. The mixture was extracted with ethyl acetate (5 × 10 mL), the combined organic layers were dried over Na<sub>2</sub>SO<sub>4</sub>, then filtered and concentrated *in vacuo*. The residue was purified on silica gel chromatography (Pentane/Ethyl acetate = 1/1 ~ 1/3) to provide **30-1** as a white powder (18.7 mg, 69%).

Data of **30-1**: white powder, m.p. = 64 - 66 °C;

[α]<sub>D</sub><sup>20</sup> +58.9 (c 1.0, CHCl<sub>3</sub>);

<sup>1</sup>H NMR (400 MHz, methanol-d<sub>4</sub>) δ 6.30 (d, *J* = 3.3 Hz, 1H, *H*<sub>13</sub>), 6.08 (dq, *J* = 3.1, 1.6 Hz, 1H, *H*<sub>5</sub>), 5.79 (d, *J* = 2.8 Hz, 1H, *H*<sub>13</sub>), 5.04 (dp, *J* = 6.9, 2.2 Hz, 1H, *H*<sub>6</sub>), 4.73 (ddd, *J* = 7.0, 2.5, 1.2 Hz, 1H, *H*<sub>8</sub>), 4.11 (ddd, *J* = 7.1, 3.6, 1.2 Hz, 1H, *H*<sub>7</sub>), 4.07 (s, 1H, *H*<sub>1</sub>), 2.55 (dd, *J* = 15.2, 6.9 Hz, 1H, *H*<sub>9</sub>), 1.89 (t, *J* = 1.8 Hz, 3H, *H*<sub>15</sub>), 1.82 (ddd, *J* = 15.2, 2.6, 1.0 Hz, 1H, *H*<sub>9</sub>), 1.34 (s, 3H, *H*<sub>14</sub>) ppm;

<sup>13</sup>C NMR (100 MHz, methanol-d<sub>4</sub>) δ 172.1 (*C*<sub>12</sub>), 137.1 (*C*<sub>5</sub>H), 136.1 (*C*<sub>11</sub>), 124.1 (*C*<sub>13</sub>H<sub>2</sub>), 120.1 (*C*<sub>4</sub>), 98.5 (*C*<sub>2</sub>), 85.8 (*C*<sub>3</sub>), 82.2 (*C*<sub>6</sub>H), 75.7 (*C*<sub>10</sub>), 69.5 (*C*<sub>1</sub>H), 68.3 (*C*<sub>8</sub>H), 50.6 (*C*<sub>7</sub>H), 46.7 (*C*<sub>9</sub>H<sub>2</sub>), 27.7 (*C*<sub>14</sub>H<sub>3</sub>), 23.0 (*C*<sub>15</sub>H<sub>3</sub>) ppm;

IR (film, cm<sup>-1</sup>) 3391, 2928, 1743, 1277, 140, 1022;

HRMS(ESI) [M + Na]<sup>+</sup> calculated for C<sub>15</sub>H<sub>18</sub>NaO<sub>5</sub>: 301.1068, found: 301.1052;

TLC: R<sub>f</sub> = 0.20 (Petroleum ether/Ethyl acetate = 1/2).

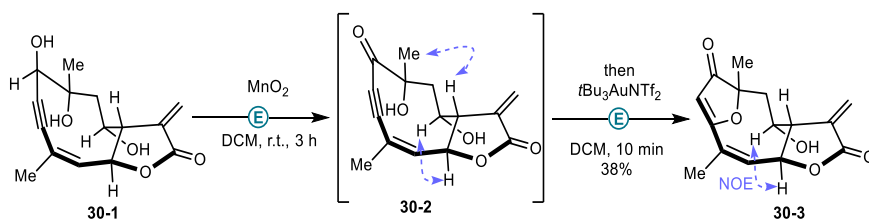

To a stirred solution of triol **30-1** (15 mg, 0.054 mmol) in CH<sub>2</sub>Cl<sub>2</sub> (5.0 mL) was added MnO<sub>2</sub> (47 mg, 0.79 mmol). The reaction mixture was stirred at room temperature for 3 hours or till TLC analysis showed disappearance of starting material. Then, MnO<sub>2</sub> was filtered off and washed with CH<sub>2</sub>Cl<sub>2</sub> (1.0 mL). *t*Bu<sub>3</sub>AuNTf<sub>2</sub> (2.2 mg, 0.003 mmol) was added to the CH<sub>2</sub>Cl<sub>2</sub> solution and the mixture was stirred for 10 minutes or till the TLC analysis showed disappearance of starting material. The resulted solution was concentrated *in vacuo* and the residue was purified on silica gel chromatography (Pentane/Ethyl acetate = 2/1~1/1) to provide the **30-3** as waxy solid (5.6 mg, 38%).

Data of **30-2**: waxy solid;

$[\alpha]_D^{20}$  +345.3 (c 0.2, CHCl<sub>3</sub>);

<sup>1</sup>H NMR (400 MHz, CDCl<sub>3</sub>) δ 6.50 (d, *J* = 3.0 Hz, 1H, *H*<sub>13</sub>), 6.38 (dq, *J* = 4.6, 1.6 Hz, 1H, *H*<sub>5</sub>), 5.94 (dd, *J* = 2.6, 0.5 Hz, 1H, *H*<sub>13</sub>), 5.05 (ddt, *J* = 6.0, 3.6, 1.8 Hz, 1H, *H*<sub>6</sub>), 4.24 (p, *J* = 4.9 Hz, 1H, *H*<sub>8</sub>), 3.54 (d, *J* = 1.4 Hz, 1H, -OH), 3.49 (ddt, *J* = 5.8, 4.9, 2.9 Hz, 1H, *H*<sub>7</sub>), 2.51 (ddd, *J* = 15.6, 4.8, 1.4 Hz, 1H, *H*<sub>9</sub>), 2.29 (dd, *J* = 15.5, 5.1 Hz, 1H, *H*<sub>9</sub>), 2.23 (d, *J* = 4.9 Hz, 1H, -OH), 1.99 (t, *J* = 1.7 Hz, 3H, *H*<sub>15</sub>), 1.50 (s, 3H, *H*<sub>14</sub>) ppm;

<sup>13</sup>C NMR (100 MHz, CDCl<sub>3</sub>) δ <sup>13</sup>C NMR (101 MHz, CDCl<sub>3</sub>) δ 190.5 (*C*<sub>1</sub>H), 169.2 (*C*<sub>12</sub>), 144.9 (*C*<sub>5</sub>H), 133.2 (*C*<sub>11</sub>), 127.1 (*C*<sub>13</sub>H<sub>2</sub>), 118.1 (*C*<sub>4</sub>), 102.2 (br, *C*<sub>3</sub>), 93.8 (*C*<sub>2</sub>), 81.2 (*C*<sub>10</sub>), 80.5 (*C*<sub>6</sub>H), 70.5 (*C*<sub>8</sub>H), 50.0 (*C*<sub>7</sub>H), 48.1 (br, *C*<sub>9</sub>H<sub>2</sub>), 26.7 (*C*<sub>14</sub>H<sub>3</sub>), 20.8 (*C*<sub>15</sub>H<sub>3</sub>) nppm;

IR (film, cm<sup>-1</sup>) 3450, 2925, 2184, 1763, 1671, 1326, 1278, 1135, 1077, 1010, 817;

HRMS(ESI) [M + Na]<sup>+</sup> calculated for C<sub>15</sub>H<sub>16</sub>NaO<sub>5</sub>: 299.0905, found: 299.0895;

TLC: R<sub>f</sub> = 0.40 (Petroleum ether/Ethyl acetate = 1/2).

Data of **30-3**: waxy solid;

$[\alpha]_D^{20}$  +249.9 (c 0.2, CHCl<sub>3</sub>);

<sup>1</sup>H NMR (400 MHz, CDCl<sub>3</sub>) δ 6.52 (d, *J* = 2.7 Hz, 1H, *H*<sub>13</sub>), 6.09-5.98 (m, 1H, *H*<sub>5</sub>), 5.80 (d, *J* = 2.4 Hz, 1H, *H*<sub>13</sub>), 5.63 (m, 2H, *H*<sub>6</sub> + *H*<sub>2</sub>), 4.06 (td, *J* = 7.1, 3.5 Hz, 1H, *H*<sub>8</sub>), 2.85 (dq, *J* = 6.1, 2.8 Hz, 1H, *H*<sub>7</sub>), 2.29 (dd, *J* = 14.5, 2.4 Hz, 1H, *H*<sub>9</sub>), 2.17 (dd, *J* = 14.5, 9.7 Hz, 1H, *H*<sub>9</sub>), 2.04 (possible d, 1H, -OH), 2.03 (d, *J* = 2.0 Hz, 3H, *H*<sub>15</sub>), 1.56 (s, 3H, *H*<sub>14</sub>) ppm;

<sup>13</sup>C NMR (100 MHz, CDCl<sub>3</sub>) δ 206.7 (*C*<sub>1</sub>), 183.5 (*C*<sub>3</sub>), 169.8 (*C*<sub>12</sub>), 140.0 (*C*<sub>5</sub>H), 133.4 (*C*<sub>11</sub>), 129.5 (*C*<sub>13</sub>H<sub>2</sub>), 127.6 (*C*<sub>4</sub>), 102.0 (*C*<sub>2</sub>), 86.3 (*C*<sub>10</sub>), 82.4 (*C*<sub>6</sub>H<sub>1</sub>), 71.1 (*C*<sub>8</sub>H<sub>1</sub>), 55.4 (*C*<sub>7</sub>H<sub>1</sub>), 45.0 (*C*<sub>9</sub>H<sub>2</sub>), 21.0 (*C*<sub>14</sub>H<sub>3</sub>), 18.2 (*C*<sub>15</sub>H<sub>3</sub>) ppm;

IR (film, cm<sup>-1</sup>) 3522, 1760, 1692, 1567, 1276, 1120, 995, 546;

HRMS(ESI) [M + Na]<sup>+</sup> calculated for C<sub>15</sub>H<sub>16</sub>NaO<sub>5</sub>: 299.0905, found: 299.0895;

TLC: R<sub>f</sub> = 0.35 (Petroleum ether/Ethyl acetate = 1/2).

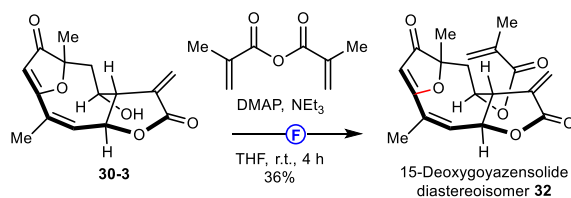

To a stirred solution of alcohol **30-3** (5.6 mg, 0.02 mmol) in THF (1.0 mL) was added NEt<sub>3</sub> (50 μL, 0.36 mmol) and methylacrylic anhydride (25 μL, 0.17 mmol) followed by a trace of DMAP. The reaction mixture was stirred at room temperature for approximately 3 hours or till the TLC analysis showed disappearance of the starting material. Then, the reaction was quenched with *sat. aq.* NaHCO<sub>3</sub> (2.0 mL), the mixture was extracted with ethyl acetate (2 × 5.0 mL), the combined organic layers were dried over Na<sub>2</sub>SO<sub>4</sub>, filtered and

concentrated *in vacuo*. The residue was purified on silica gel chromatography (Pentane/Ethyl acetate = 4/1 ~ 5/2) to provide the **32** as a waxy solid (2.5 mg, 36%).

Data of **32**: waxy solid;

$[\alpha]_D^{20} +327.9$  (c 0.2, CHCl<sub>3</sub>);

<sup>1</sup>H NMR (500 MHz, CDCl<sub>3</sub>) δ 6.25 (d, *J* = 2.6 Hz, 1H, *H*<sub>13</sub>), 6.05 (dt, *J* = 2.6, 1.4 Hz, 2H, *H*<sub>5</sub> + *H*<sub>3</sub>'), 5.73 (dp, *J* = 4.6, 2.2 Hz, 1H, *H*<sub>6</sub>), 5.64 (s, 1H, *H*<sub>2</sub>), 5.57 (m, 1H, *H*<sub>3</sub>'), 5.47 (d, *J* = 2.3 Hz, 1H, *H*<sub>13</sub>), 5.03 (ddd, *J* = 11.3, 4.8, 2.3 Hz, 1H, *H*<sub>8</sub>), 2.89 (dq, *J* = 6.5, 2.5 Hz, 1H, *H*<sub>7</sub>), 2.38 (dd, *J* = 14.0, 11.3 Hz, 1H, *H*<sub>9</sub>), 2.25 (dd, *J* = 14.1, 2.3 Hz, 1H, *H*<sub>9</sub>), 2.04 (t, *J* = 1.9 Hz, 3H, *H*<sub>15</sub>), 1.87 (dd, *J* = 1.6, 1.0 Hz, 3H, *H*<sub>4</sub>'), 1.58 (s, 3H *H*<sub>14</sub>) ppm;

<sup>13</sup>C NMR (126 MHz, CDCl<sub>3</sub>) δ 206.3 (*C*<sub>1</sub>), 183.6 (*C*<sub>3</sub>), 169.1 (*C*<sub>12</sub>), 166.9 (*C*<sub>1</sub>'), 140.0 (*C*<sub>5</sub>H), 135.9 (*C*<sub>2</sub>'), 133.9 (*C*<sub>11</sub>), 127.3 (*C*<sub>4</sub>), 126.6 (*C*<sub>3</sub>H<sub>2</sub>), 126.3 (*C*<sub>13</sub>H<sub>2</sub>), 102.1 (*C*<sub>2</sub>), 85.6 (*C*<sub>10</sub>), 82.8 (*C*<sub>6</sub>H<sub>1</sub>), 73.8 (*C*<sub>8</sub>H<sub>1</sub>), 54.0 (*C*<sub>7</sub>H<sub>1</sub>), 41.6 (*C*<sub>9</sub>H<sub>2</sub>), 21.3 (*C*<sub>14</sub>H<sub>3</sub>), 18.6 (*C*<sub>15</sub>H<sub>3</sub>), 18.2 (*C*<sub>4</sub>H<sub>3</sub>) ppm;

IR (film, cm<sup>-1</sup>) 1768, 1706, 1635, 1570, 1303, 1158, 1125, 1020, 996;

HRMS(ESI) [*M* + Na]<sup>+</sup> calculated for C<sub>19</sub>H<sub>20</sub>NaO<sub>6</sub>: 367.1151, found: 367.1158;

TLC: R<sub>f</sub> = 0.60 (Petroleum ether/Ethyl acetate = 1/2).

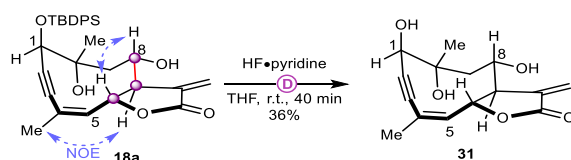

To a solution of TBDPS-protected alcohol **18a** (130 mg, 0.25 mmol) in an Eppendorf safe-lock tube was added 1 drop of THF followed by hydrogen fluoride pyridine (hydrogen fluoride ~70%, 0.3 mL). The reaction mixture was left on a shaker at room temperature for 40 minutes. Then CH<sub>2</sub>Cl<sub>2</sub> (2.0 mL) was added and the reaction was quenched carefully with *sat. aq.* NaHCO<sub>3</sub> (caution the mixture bubbles out while quenching) until the evolution of gas stopped. The mixture was extracted with ethyl acetate (5 × 10 mL), the combined organic layers were dried over Na<sub>2</sub>SO<sub>4</sub>, filtered and concentrated *in vacuo*. The residue was purified on silica gel chromatography (Pentane/Ethyl acetate = 2/1 ~ 1/2) to provide the **31** as a waxy solid (25 mg, 36%).

Data of **31**: waxy solid;

$[\alpha]_D^{20} -183.3$  (c 1.0, CHCl<sub>3</sub>);

<sup>1</sup>H NMR (400 MHz, CDCl<sub>3</sub>) δ 6.40 (d, *J* = 1.8 Hz, 1H, *H*<sub>13</sub>), 5.97 (dt, *J* = 3.6, 1.8 Hz, 1H, *H*<sub>5</sub>), 5.78 (dd, *J* = 1.6, 0.7 Hz, 1H, *H*<sub>13</sub>), 5.12 (dt, *J* = 3.8, 2.0 Hz, 1H, *H*<sub>6</sub>), 4.21 (d, *J* = 4.1 Hz, 1H, *H*<sub>1</sub>), 4.02 (br, d, *J* = 9.1 Hz, 1H, *H*<sub>7</sub>), 3.86 (br s, 1H, *H*<sub>8</sub>), 3.23 (br s, 1H, -OH), 2.60 (br d, *J* = 15.7 Hz, 1H, *H*<sub>9</sub>), 2.12 (d, *J* = 4.4 Hz, 1H, *C*<sub>1</sub>-OH), 2.06 (dd, *J* = 15.5, 6.5 Hz, 1H, *H*<sub>9</sub>), 1.83 (t, *J* = 1.8 Hz, 3H, *H*<sub>15</sub>), 1.49 (s, 3H, *H*<sub>14</sub>) ppm;

<sup>13</sup>C NMR (100 MHz, CDCl<sub>3</sub>) δ 170.2 (*C*<sub>12</sub>), 140.5 (*C*<sub>5</sub>H), 135.8 (*C*<sub>11</sub>), 126.0 (*C*<sub>13</sub>H<sub>2</sub>), 120.2 (*C*<sub>4</sub>), 99.3 (*C*<sub>2</sub>), 84.4 (*C*<sub>3</sub>), 79.3 (*C*<sub>6</sub>H), 76.9 (*C*<sub>10</sub>), 71.0 (*C*<sub>8</sub>H), 70.5 (*C*<sub>1</sub>H), 50.7 (br, *C*<sub>7</sub>H), 31.3 (br, *C*<sub>14</sub>H<sub>3</sub>), 21.0 (*C*<sub>15</sub>H<sub>3</sub>) ppm; Signal of *C*<sub>2</sub>/*C*<sub>3</sub> could not be detected on <sup>13</sup>C NMR because of the conformational changes, the chemical shift of *C*<sub>2</sub> and *C*<sub>3</sub> were confirmed by HMBC;

IR (film, cm<sup>-1</sup>) 3403, 2958, 2350, 1746, 1277, 1153, 1019, 818, 533;

HRMS(ESI) [*M* + Na]<sup>+</sup> calculated for C<sub>15</sub>H<sub>18</sub>NaO<sub>5</sub>: 301.1068, found: 301.1052;

TLC: R<sub>f</sub> = 0.30 (Petroleum ether/Ethyl acetate = 1/2).

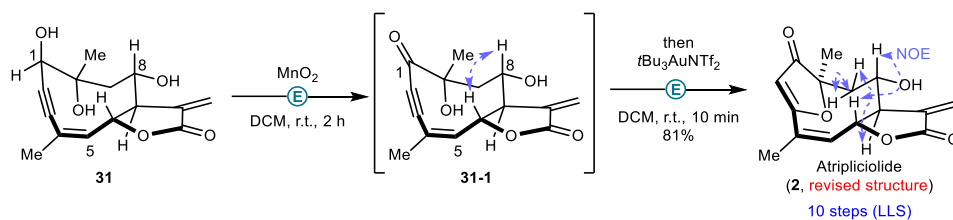

To a stirred solution of triol **31** (22 mg, 0.079 mmol) in CH<sub>2</sub>Cl<sub>2</sub> (1.0 mL) was added MnO<sub>2</sub> (69 mg, 0.79 mmol). The reaction mixture was stirred at room temperature for 2 hours or till TLC analysis showed disappearance of starting material. Then, MnO<sub>2</sub> was filtered off and washed with CH<sub>2</sub>Cl<sub>2</sub> (1.0 mL). *t*Bu<sub>3</sub>AuNTf<sub>2</sub> (3.3 mg, 0.004 mmol) was added to the CH<sub>2</sub>Cl<sub>2</sub> solution and stirred for 10 minutes or till the TLC analysis showed disappearance of starting material. The resulted solution was concentrated *in vacuo*. The residue was purified on silica gel chromatography (Pentane/Ethyl acetate = 2/1) to provide the **2** as white solid (17.6 mg, 81%).

The absolute configuration of **2** was determined by X-ray diffraction measurements. Single crystals of **2** suitable for X-ray crystallographic analysis were obtained by a single recrystallization by slow evaporation at room temperature using *n*-hexanes/ CH<sub>2</sub>Cl<sub>2</sub> as a solvent mixture. See **Supplementary Section m** for detail.

Data of **31-1**: waxy solid;

$[\alpha]_D^{20}$  -376.9 (c 0.1, CHCl<sub>3</sub>);

<sup>1</sup>H NMR (400 MHz, CDCl<sub>3</sub>) δ 6.45 (d, *J* = 2.5 Hz, 1H, *H*<sub>13</sub>), 6.37 (dt, *J* = 3.0, 1.5 Hz, 1H, *H*<sub>5</sub>), 5.85 (d, *J* = 2.2 Hz, 1H, *H*<sub>13</sub>), 5.15 (dp, *J* = 4.6, 2.3 Hz, 1H, *H*<sub>6</sub>), 4.22 (br s, 1H, *H*<sub>8</sub>), 4.00 (br s, 1H, *H*<sub>7</sub>), 3.61 (br s, 1H, -OH), 2.45-2.43 (m, 2H, *H*<sub>9</sub>), 1.97 (like t, *J* = 1.9 Hz, 3H, *H*<sub>15</sub>), 1.51 (s, 3H, *H*<sub>14</sub>) ppm;

<sup>13</sup>C NMR (100 MHz, CDCl<sub>3</sub>) δ <sup>13</sup>C NMR (101 MHz, CDCl<sub>3</sub>) δ 189.1 (*C*<sub>1</sub>), 169.1 (*C*<sub>12</sub>), 145.8 (br, *C*<sub>5</sub>H), 134.3 (*C*<sub>11</sub>), 125.7 (br, *C*<sub>13</sub>H<sub>2</sub>), 117.6 (*C*<sub>4</sub>), 98.5 (*C*<sub>3</sub>), 93.7 (br, *C*<sub>2</sub>), 80.6 (*C*<sub>10</sub>), 78.9 (br, *C*<sub>6</sub>H), 70.5 (*C*<sub>8</sub>H), 50.2 (*C*<sub>7</sub>H), 42.1 (*C*<sub>9</sub>H<sub>2</sub>), 27.4 (br, *C*<sub>14</sub>H<sub>3</sub>), 21.10 (br, *C*<sub>15</sub>H<sub>3</sub>) ppm; Signal of *C*<sub>9</sub> could not be detected on <sup>13</sup>C NMR because of the conformational changes, the chemical shift was confirmed by HMBC;

IR (film, cm<sup>-1</sup>) 3443, 2927, 2183, 1751, 1675, 1278, 1136, 1014;

HRMS(ESI) [M + H]<sup>+</sup> calculated for C<sub>15</sub>H<sub>17</sub>O<sub>5</sub>: 277.1068, found: 277.1076;

TLC: R<sub>f</sub> = 0.20 (Petroleum ether/Ethyl acetate = 3/1).

Data of **2**: white solid; m.p. = 210 - 211 °C;

$[\alpha]_D^{20}$  -50.4 (c 0.25, CHCl<sub>3</sub>);

<sup>1</sup>H NMR and <sup>13</sup>C NMR data, see **Table S1**;

IR (film, cm<sup>-1</sup>) 3454, 1765, 1701, 1577, 1289, 1135, 1001, 815;

HRMS(ESI) [M + H]<sup>+</sup> calculated for C<sub>15</sub>H<sub>17</sub>O<sub>5</sub>: 277.1068, found: 277.1076;

TLC: R<sub>f</sub> = 0.60 (Petroleum ether/Ethyl acetate = 1/1).

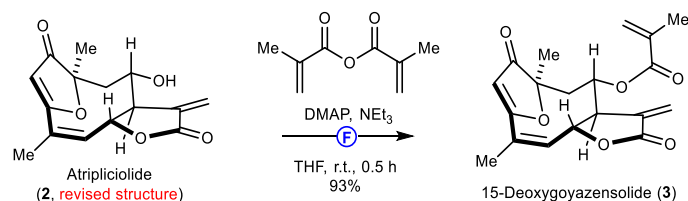

To a stirred solution of alcohol **2** (4.0 mg, 0.014 mmol) in THF (1.0 mL) was added NEt<sub>3</sub> (50  $\mu$ L, 0.36 mmol) and methylacrylic anhydride (25  $\mu$ L, 0.17 mmol) followed by a trace of DMAP. The reaction mixture was then stirred at room temperature for 30 minutes or till the TLC analysis showed disappearance of starting material. Then, the reaction was quenched with *sat. aq.* NaHCO<sub>3</sub> (2.0 mL), the mixture was extracted with ethyl acetate (2  $\times$  5.0 mL), the combined organic layers were dried over Na<sub>2</sub>SO<sub>4</sub>, then filtered and concentrated *in vacuo*. The residue was purified on silica gel chromatography (Pentane/Ethyl acetate = 10/1 ~ 5/1) to provide the **5** as a waxy solid (3.9 mg, 93%).

Data of **3**: waxy solid;

$[\alpha]_D^{20}$  -38.5 (c 0.20, CHCl<sub>3</sub>); lit.  $[\alpha]_D^{24}$  -38 (c 0.76, CHCl<sub>3</sub>) (*Phytochemistry*, **1976**, *15*, 1775-1776.);

<sup>1</sup>H NMR and <sup>13</sup>C NMR data, see **Table S4**;

IR (film, cm<sup>-1</sup>) 2925, 2854, 1769, 1707, 1588, 1292, 1138, 1027, 520;

HRMS(ESI) [M + Na]<sup>+</sup> calculated for C<sub>19</sub>H<sub>20</sub>NaO<sub>6</sub>: 367.1151, found: 367.1158;

TLC: R<sub>f</sub> = 0.50 (Petroleum ether/Ethyl acetate = 3/1).

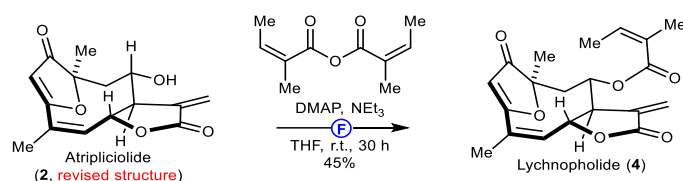

To a stirred solution of alcohol **2** (2.0 mg, 0.007 mmol) in THF (1.0 mL) was added NEt<sub>3</sub> (50  $\mu$ L, 0.36 mmol) and angelic anhydride (25  $\mu$ L, 0.14 mmol) followed by a trace of DMAP. The reaction mixture was then stirred at room temperature for 30 hours or till the TLC analysis showed disappearance of starting material. Then, the reaction was quenched with *sat. aq.* NaHCO<sub>3</sub> (2.0 mL), the mixture was extracted with ethyl acetate (2  $\times$  5.0 mL), the combined organic layers were dried over Na<sub>2</sub>SO<sub>4</sub>, then filtered and concentrated *in vacuo*. The residue was purified on silica gel chromatography (Pentane/Ethyl acetate = 10/1 ~ 5/1) to provide the **4** as a waxy solid (1.1 mg, 45%).

We observed partial isomerization from angelate to tiglate (angelate/tiglate = 11/1 as determined by crude <sup>1</sup>H NMR) and a little amount of **5** was isolated from this reaction.

Data of **4**: waxy solid;

$[\alpha]_D^{20}$  -50.0 (c 0.035, CHCl<sub>3</sub>); lit.  $[\alpha]_D^{24}$  -56.9 (c 0.26, CHCl<sub>3</sub>) (*Phytochemistry*, **1980**, *19*, 2381-2385.);

<sup>1</sup>H NMR and <sup>13</sup>C NMR data see **Table S5**;

IR (film, cm<sup>-1</sup>) 1769, 1709, 1589, 1291, 1234, 1138, 1030, 527;

HRMS(ESI) [M + H]<sup>+</sup> calculated for C<sub>20</sub>H<sub>23</sub>O<sub>6</sub>: 359.1495, found: 359.1517;

TLC: R<sub>f</sub> = 0.55 (Petroleum ether/Ethyl acetate = 3/1).

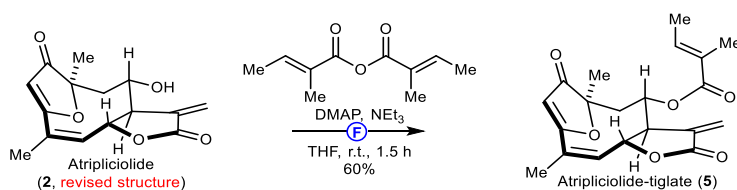

To a stirred solution of alcohol **2** (2 mg, 0.007 mmol) in THF (1 mL) was added NEt<sub>3</sub> (50 μL, 0.36 mmol) and tiglic anhydride (25 μL, 0.14 mmol). Then trace DMAP was added. The reaction mixture was stirred at room temperature for 90 min or till the TLC analysis showed disappearance of starting material. Then, the reaction was quenched with *sat. aq.* NaHCO<sub>3</sub> (2.0 mL), the mixture was extracted with ethyl acetate (2 × 5.0 mL), the combined organic layers were dried over Na<sub>2</sub>SO<sub>4</sub>, then filtered and concentrated *in vacuo*. The residue was purified on silica gel chromatography (Pentane/Ethyl acetate = 10/1 ~ 5/1) to provide the **5** as a waxy solid (1.5 mg, 60%).

Data of **5**: waxy solid;

[α]<sub>D</sub><sup>20</sup> -49.5 (c 0.020, CHCl<sub>3</sub>); lit. [α]<sub>D</sub><sup>24</sup> -54.3 (c 2.0, CHCl<sub>3</sub>) (*Phytochemistry*, **1980**, *19*, 2663-2668.);

<sup>1</sup>H NMR and <sup>13</sup>C NMR data see **Table S6**;

IR (film, cm<sup>-1</sup>) 1769, 1706, 1589, 1291, 1274, 1137, 1029;

HRMS(ESI) [M + H]<sup>+</sup> calculated for C<sub>20</sub>H<sub>23</sub>O<sub>6</sub>: 359.1495, found: 359.1478;

TLC: R<sub>f</sub> = 0.50 (Petroleum ether/Ethyl acetate = 3/1).

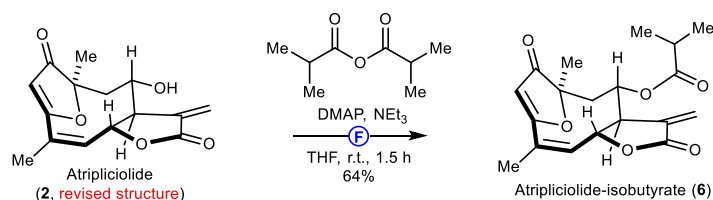

To a stirred solution of alcohol **2** (2.0 mg, 0.007 mmol) in THF (1.0 mL) was added NEt<sub>3</sub> (50 μL, 0.36 mmol) and isobutyric anhydride (25 μL, 0.15 mmol) followed by a trace of DMAP. The reaction mixture was stirred at room temperature for 90 minutes or till the TLC analysis showed disappearance of starting material. Then, the reaction was quenched with *sat. aq.* NaHCO<sub>3</sub> (2.0 mL), the mixture was extracted with ethyl acetate (2 × 5.0 mL), the combined organic layers were dried over Na<sub>2</sub>SO<sub>4</sub>, then filtered and concentrated *in vacuo*. The residue was purified on silica gel chromatography (Pentane/Ethyl acetate = 10/1 ~ 5/1) to provide the **6** as a waxy solid (1.6 mg, 64%).

Data of **6**: waxy solid;

[α]<sub>D</sub><sup>20</sup> -88.0 (c 0.025, CHCl<sub>3</sub>); lit. [α]<sub>D</sub><sup>24</sup> -158 (c 0.54, CHCl<sub>3</sub>) (*Phytochemistry*, **1982**, *21*, 1669-1673.);

<sup>1</sup>H NMR and <sup>13</sup>C NMR data see **Table S7**;

IR (film, cm<sup>-1</sup>) 1770, 1709, 1588, 1291, 1139, 1029;

HRMS(ESI) [M + H]<sup>+</sup> calculated for C<sub>19</sub>H<sub>23</sub>O<sub>6</sub>: 347.1495, found: 347.1512;

TLC: R<sub>f</sub> = 0.60 (Petroleum ether/Ethyl acetate = 3/1).

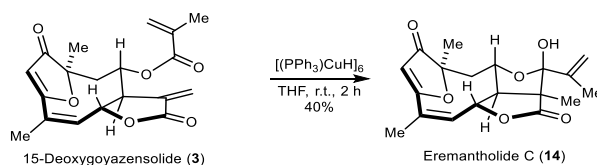

The reaction was conducted following a previously reported procedure.<sup>24</sup>

A solution of 15-deoxygoyazensolide (**3**) (1.0 mg, 0.0029 mmol) in THF (0.2 mL) and commercially available Stryker's reagent (3.0 mg, 0.0015 mmol), were mixed together forming a homogeneous solution that was stirred at room temperature for 2 hours in a glove box under an inert N<sub>2</sub> atmosphere. The reaction was then quenched with *sat. aq.* NH<sub>4</sub>Cl (1.0 mL), extracted with ethyl acetate (3 × 5.0 mL), dried over Na<sub>2</sub>SO<sub>4</sub>, filtered and concentrated *in vacuo*. The residue was purified by preparative TLC (Pentane/Ethyl acetate = 3/1) to provide **14** as a waxy solid (0.4 mg, 40%).

Data of **14**: waxy solid;

<sup>1</sup>H NMR and <sup>13</sup>C NMR data see **Table S13**;

HRMS(ESI) [M + Na]<sup>+</sup> calculated for C<sub>19</sub>H<sub>22</sub>NaO<sub>6</sub>: 369.1314, found: 369.1323;

TLC: R<sub>f</sub> = 0.60 (Petroleum ether/Ethyl acetate = 1/1).

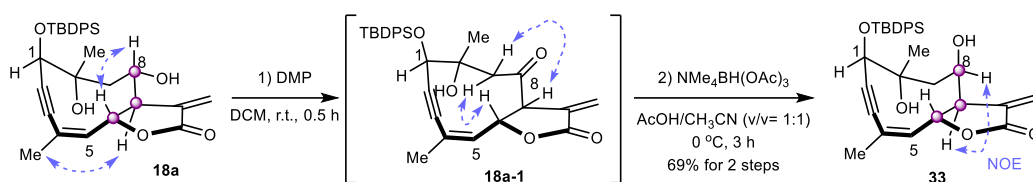

A 10 mL round bottom flask equipped with a magnetic stir bar was charged with alcohol **18a** (40 mg, 0.078 mmol) and CH<sub>2</sub>Cl<sub>2</sub> (2.0 mL), followed by addition of DMP (50 mg, 0.12 mmol). The reaction was stirred for 30 minutes or till the TLC analysis showed disappearance of starting material. The reaction was then quenched with diluted Na<sub>2</sub>S<sub>2</sub>O<sub>3</sub> solution (2.0 mL) and extracted with CH<sub>2</sub>Cl<sub>2</sub> (3 × 10 mL). The combined organic layers were dried over Na<sub>2</sub>SO<sub>4</sub>, then filtered and concentrated *in vacuo* to provide **18a-1** as a waxy solid. The crude product was used directly as starting material for the Evans–Saksena reduction without further purification. A 10 mL round bottom flask equipped with a magnetic stir bar was charged with **18a-1**, MeCN (2.0 mL) and AcOH (2.0 mL). Then, the mixture was cooled down to 0 °C, Me<sub>4</sub>NBH(OAc)<sub>3</sub> (102 mg, 0.39 mmol) was added in portions and the reaction was stirred for 3 hours or till the TLC analysis showed disappearance of starting material. Then, the reaction was quenched with *sat. aq.* NaHCO<sub>3</sub> (15 mL, caution the mixture bubbles out while quenching) until the evolution of gas stopped and extracted with CH<sub>2</sub>Cl<sub>2</sub> (3 × 10 mL). The combined organic layers were dried over Na<sub>2</sub>SO<sub>4</sub>, then filtered and concentrated *in vacuo*. The residue was purified on silica gel chromatography (Pentane/Ethyl acetate = 2/1) to give alcohol **33** as a waxy solid (27 mg, 30%).

Data of **18a-1**: yellow oil;

[α]<sub>D</sub><sup>20</sup> -120.9 (c 1.0, CHCl<sub>3</sub>);

<sup>1</sup>H NMR (400 MHz, CDCl<sub>3</sub>) δ 7.70-7.67 (m, 4H, -OTBDPS), 7.45-7.36 (m, 6H, -OTBDPS), 6.28 (d, J = 3.5 Hz, 1H, H<sub>13</sub>), 5.97 (dq, J = 3.3, 1.6 Hz, 1H, H<sub>5</sub>), 5.57 (d, J = 3.1 Hz, 1H, H<sub>13</sub>), 5.55-5.50 (m, 1H, H<sub>6</sub>), 4.42-4.39 (m, 1H, H<sub>7</sub>), 4.40 (s, 1H, H<sub>1</sub>), 2.93 (d, J = 13.7 Hz, 1H, H<sub>9</sub>), 2.68 (d, J = 13.7 Hz, 1H, H<sub>9</sub>), 1.58 (t, J = 1.8 Hz, 3H, H<sub>15</sub>), 1.51 (s, 3H, H<sub>14</sub>), 1.10 (s, 9H, -OTBDPS) ppm;

<sup>24</sup> Sass, D. C., Heleno, V. C. G., Cavalcante, S., da Silva Barbosa, J., Soares, A. C. F., Constantino, M. G. *J. Org. Chem.* **2012**, *77*, 9374-9378.

$^{13}\text{C}$  NMR (100 MHz,  $\text{CDCl}_3$ )  $\delta$  203.1 ( $C_8$ ), 167.37 ( $C_{12}$ ), 136.3 (TBDPS), 136.1 (TBDPS), 134.9 ( $C_{11}$ ), 134.7 ( $C_5\text{H}$ ), 132.8 (TBDPS), 132.5 (TBDPS), 130.3 (TBDPS), 130.1 (TBDPS), 128.0 (TBDPS), 127.6 (TBDPS), 122.8 ( $C_{13}\text{H}_2$ ), 119.5 ( $C_4$ ), 97.0 ( $C_2$ ), 86.9 ( $C_3$ ), 79.6 ( $C_{10}$ ), 77.8 ( $C_6\text{H}$ ), 71.8 ( $C_1\text{H}$ ), 59.0 ( $C_7\text{H}$ ), 48.2 ( $C_9\text{H}_2$ ), 27.1 (TBDPS), 24.3 ( $C_{14}\text{H}_3$ ), 21.6 ( $C_{15}\text{H}_3$ ), 19.5 (TBDPS) ppm;

IR (film,  $\text{cm}^{-1}$ ) 1767, 1703, 1288, 1110, 1041, 703;

HRMS(ESI)  $[\text{M} + \text{Na}]^+$  calculated for  $\text{C}_{31}\text{H}_{34}\text{NaO}_5\text{Si}$ : 537.2067, found: 537.2073;

TLC: Rf = 0.20 (Petroleum ether/Ethyl acetate = 5/1).

Data of **33**: waxy solid;

$[\alpha]_D^{20}$  -198 (c 0.53,  $\text{CHCl}_3$ );

$^1\text{H}$  NMR (400 MHz,  $\text{CDCl}_3$ )  $\delta$  7.65-7.68 (m, 4H, -OTBDPS), 7.33-7.45 (m, 6H, -OTBDPS), 6.31 (d,  $J$  = 2.9 Hz, 1H,  $H_{13}$ ), 5.96 (m, 1H,  $H_{13}$ ), 5.95 (m, 1H,  $H_5$ ), 5.14 (br t,  $J$  = 7 Hz, 1H,  $H_6$ ), 4.63 (br s, 1H,  $H_8$ ), 4.01 (s, 1H,  $H_1$ ), 3.32 (br s, 1H,  $H_7$ ), 2.61 (br d,  $J$  = 15.6 Hz, 1H,  $H_9$ ), 2.13 (br s, 1H, -OH), 1.75 (br s, 1H, -OH), 1.73 (dd,  $J$  = 15.6, 6.3 Hz,  $H_9$ ), 1.64 (t,  $J$  = 1.5 Hz, 3H,  $H_{15}$ ), 1.39 (s, 3H,  $H_{14}$ ), 1.08 (s, 9H, -OTBDPS) ppm;

$^{13}\text{C}$  NMR (100 MHz,  $\text{CDCl}_3$ )  $\delta$  170.6 ( $C_{12}$ ), 138.8 ( $C_5\text{H}$ ), 136.3 ( $C_{11}$ ), 136.3 (TBDPS), 136.1 (TBDPS), 133.2 (TBDPS), 132.9 (TBDPS), 130.2 (TBDPS), 130.1 (TBDPS), 127.9 (TBDPS), 127.5 (TBDPS), 123.4 ( $C_{13}\text{H}_2$ ), 121.4 ( $C_4$ ), 98.4 ( $C_2$ ), 86.1 ( $C_3$ ), 78.1 ( $C_6\text{H}$ ), 76.3 ( $C_{10}$ ), 72.0 ( $C_1\text{H}$ ), 70.1 ( $C_8\text{H}$ ), 52.0 ( $C_7\text{H}$ ), 39.3 ( $C_9\text{H}_2$ ), 30.4 ( $C_{14}\text{H}_3$ ), 27.2 (TBDPS), 20.8 ( $C_{15}\text{H}_3$ ), 19.5 (TBDPS) ppm; The signal of  $C_8$  could not be detected on  $^{13}\text{C}$  NMR because of the conformational changes, the chemical shift was confirmed by HSQC.  $^{13}\text{C}$  NMR of  $C_{11}$  overlaps with TBDPS, the chemical shift was confirmed by HMBC;

IR (film,  $\text{cm}^{-1}$ ) 3475, 2933, 1753, 1428, 1111, 703;

HRMS(ESI)  $[\text{M} + \text{Na}]^+$  calculated for  $\text{C}_{31}\text{H}_{36}\text{NaO}_5\text{Si}$ : 539.2236, found: 539.2230;

TLC: Rf = 0.30 (Petroleum ether/Ethyl acetate = 2/1).

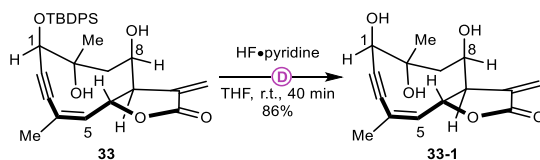

To a solution of TBDPS-protected alcohol **33** (27.6 mg, 0.1 mmol) in an Eppendorf safe-lock tube was added 1 drop of THF followed by hydrogen fluoride pyridine (hydrogen fluoride ~70%, 0.1 mL). The mixture was left on shaker at room temperature for 40 minutes. Then  $\text{CH}_2\text{Cl}_2$  (2.0 mL) was added to the reaction followed by addition of *sat. aq.*  $\text{NaHCO}_3$  for quenching (caution the mixture bubbles out while quenching) until the evolution of gas stopped. The mixture was extracted with ethyl acetate ( $5 \times 10$  mL), the combined organic layers were dried over  $\text{Na}_2\text{SO}_4$ , filtered and concentrated *in vacuo*. The residue was purified on silica gel chromatography (Pentane/Ethyl acetate = 2/1 ~ 1/2) to provide the **33-1** as waxy solid (12.8 mg, 86%).

Data of **33-1**: waxy solid;

$[\alpha]_D^{20}$  -205 (c 1.0,  $\text{CHCl}_3$ );

$^1\text{H}$  NMR (400 MHz, acetone- $d_6$ )  $\delta$  6.07 (dd,  $J$  = 2.5, 1.1 Hz, 1H,  $H_{13}$ ), 5.99 (br s, 1H,  $H_5$ ), 5.74 (br s, 1H,  $H_{13}$ ), 5.35 (br s, 1H,  $H_6$ ), 4.71 (d,  $J$  = 6.2 Hz, 1H,  $H_8$ ), 4.49 (br s, 1H, -OH), 4.02 (t,  $J$  = 3.1 Hz, 2H,  $H_{1+}$ -OH), 3.74 (br d,  $J$  = 4.5 Hz, 1H,  $H_7$ ), 3.70 (br s, -OH), 2.69 (br s,  $H_9$ ), 1.80 (t,  $J$  = 1.6 Hz, 3H,  $H_{15}$ ), 1.63 (dd,  $J$  = 15.1, 4.7 Hz, 1H,  $H_9$ ), 1.41 (s, 3H,  $H_{14}$ ) ppm;



$^{13}\text{C}$  NMR (100 MHz, acetone- $d_6$ )  $\delta$  170.8 ( $C_{12}$ ), 141.0 (br,  $C_5\text{H}$ ), 121.0 ( $C_{13}\text{H}_2$ ), 121.0 ( $C_4$ ), 101.6 ( $C_2$ ), 84.0 (br,  $C_3$ ), 77.7 (br,  $C_6\text{H}$ ), 75.3 ( $C_{10}$ ), 71.3 ( $C_{11}\text{H}$ ), 71.3 ( $C_8\text{H}$ ), 52.0 (br,  $C_7\text{H}$ ), 40.4 ( $C_9\text{H}_2$ ), 30.4 ( $C_{14}\text{H}_3$ ), 21.0 ( $C_{15}\text{H}_3$ ) ppm; signal of  $C_3/C_5/C_{11}$  could not be detected on  $^{13}\text{C}$  NMR because of the conformational changes, the chemical shift of  $C_3$  was confirmed by HMQC. The chemical shift of  $C_5$  was confirmed by HSQC.  $^{13}\text{C}$  NMR of  $C_{11}$  could not be assigned;

IR (film,  $\text{cm}^{-1}$ ) 3427, 2930, 1747, 1272, 1143, 1021, 977;

HRMS(ESI)  $[\text{M} + \text{Na}]^+$  calculated for  $\text{C}_{15}\text{H}_{18}\text{NaO}_5$ : 301.1068, found: 301.1052;

TLC: Rf = 0.20 (Petroleum ether/Ethyl acetate = 1/2).

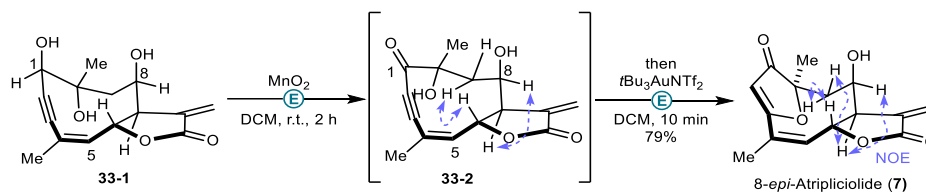

To a stirred solution of triol **33-1** (11.2 mg, 0.04 mmol) in  $\text{CH}_2\text{Cl}_2$  (1.0 mL) was added  $\text{MnO}_2$  (35 mg, 0.4 mmol). The reaction mixture was stirred at room temperature for 2 hours or till the TLC analysis showed disappearance of starting material. Then  $\text{MnO}_2$  was filtered off and washed with  $\text{CH}_2\text{Cl}_2$  (1.0 mL).  $t\text{Bu}_3\text{AuNTf}_2$  (1.7 mg, 0.002 mmol) was added to the  $\text{CH}_2\text{Cl}_2$  solution and stirred for 10 minutes till the TLC analysis showed disappearance of starting material. The resulted solution was concentrated *in vacuo* and the residue was purified on silica gel chromatography (Pentane/Ethyl acetate = 1/1) to provide the **7** as waxy solid (9.8 mg, 79%).

Data of **33-2**: waxy solid;

$[\alpha]_D^{20}$  -215.6 (c 0.2,  $\text{CHCl}_3$ );

$^1\text{H}$  NMR (400 MHz,  $\text{CDCl}_3$ )  $\delta$  6.47 (dq,  $J$  = 6.1, 1.6 Hz, 1H,  $H_5$ ), 6.37 (dd,  $J$  = 3.3, 1.0 Hz, 1H,  $H_{13}$ ), 6.23 (dd,  $J$  = 2.9, 1.0 Hz, 1H,  $H_{13}$ ), 5.27 (ddq,  $J$  = 8.8, 6.0, 1.3 Hz, 1H,  $H_6$ ), 4.71 (ddd,  $J$  = 7.0, 4.4, 2.3 Hz, 1H,  $H_8$ ), 3.47 (ddt,  $J$  = 9.1, 4.4, 3.1 Hz, 1H,  $H_7$ ), 3.12 (br s, 1H, -OH), 2.78 (br s, 1H, -OH), 2.58 (dd,  $J$  = 15.9, 2.2 Hz, 1H,  $H_9$ ), 2.10 (dd,  $J$  = 15.8, 7.3 Hz, 1H,  $H_9$ ), 1.98 (t,  $J$  = 1.5 Hz, 3H,  $H_{15}$ ), 1.40 (s, 3H,  $H_{14}$ ) ppm;

$^{13}\text{C}$  NMR (100 MHz,  $\text{CDCl}_3$ )  $\delta$  190.5 ( $C_1$ ), 169.5 ( $C_{12}$ ), 146.5 ( $C_5\text{H}$ ), 134.6 ( $C_{11}$ ), 125.4 ( $C_{13}\text{H}_2$ ), 120.4 ( $C_4$ ), 102.0 ( $C_3$ ), 95.4 ( $C_2$ ), 79.7 ( $C_{10}$ ), 78.1 ( $C_6\text{H}$ ), 69.1 ( $C_8\text{H}$ ), 50.6 ( $C_7\text{H}$ ), 40.6 ( $C_9\text{H}_2$ ), 28.2 ( $C_{14}\text{H}_3$ ), 20.5 ( $C_{15}\text{H}_3$ ) ppm;

IR (film,  $\text{cm}^{-1}$ ) 3480, 2179, 1765, 1671, 1323, 1274, 1239, 1127, 1026, 986, 555;

HRMS(ESI)  $[\text{M} + \text{Na}]^+$  calculated for  $\text{C}_{15}\text{H}_{17}\text{NaO}_5$ : 299.0905, found: 299.0895;

TLC: Rf = 0.40 (Petroleum ether/Ethyl acetate = 3/1).

Data of **7**: waxy solid;

$[\alpha]_D^{20}$  -142.7 (c 0.15,  $\text{CHCl}_3$ );

$^1\text{H}$  NMR and  $^{13}\text{C}$  NMR data see **Table S1**;

IR (film,  $\text{cm}^{-1}$ ) 3430, 2924, 1761, 1704, 1589, 1280, 1143, 611;

HRMS(ESI)  $[\text{M} + \text{Na}]^+$  calculated for  $\text{C}_{15}\text{H}_{16}\text{NaO}_5$ : 299.0905, found: 299.0895;

TLC: Rf = 0.50 (Petroleum ether/Ethyl acetate = 1/1).

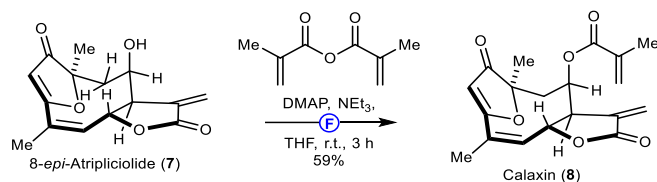

To a stirred solution of alcohol **7** (1.5 mg, 0.005 mmol) in THF (1.0 mL) was added  $\text{NEt}_3$  (25  $\mu\text{L}$ , 0.18 mmol) and methacrylic anhydride (13  $\mu\text{L}$ , 0.09 mmol) followed by a trace of DMAP. The reaction mixture was then stirred at room temperature for 3 hours or till the TLC analysis showed disappearance of starting material. Then, the reaction was quenched with *sat. aq.*  $\text{NaHCO}_3$  (2.0 mL), the mixture was extracted with ethyl acetate (2  $\times$  5.0 mL), the combined organic layers were dried over  $\text{Na}_2\text{SO}_4$ , then filtered and concentrated *in vacuo*. The residue was purified on silica gel chromatography (Pentane/Ethyl acetate = 10/1  $\sim$  3/1) to provide the calaxin **8** as a waxy solid (1.1 mg, 59%).

Data of calaxin **8**: waxy solid;

$[\alpha]_D^{20}$  -63.2 (c 0.05,  $\text{CHCl}_3$ );

$^1\text{H}$  NMR and  $^{13}\text{C}$  NMR data see **Table S8**;

IR (film,  $\text{cm}^{-1}$ ) 2362, 2343, 1771, 1707, 1593, 1291, 1151, 617;

HRMS(ESI)  $[\text{M} + \text{Na}]^+$  calculated for  $\text{C}_{19}\text{H}_{20}\text{NaO}_6$ : 367.1151, found: 367.1158;

TLC:  $R_f$  = 0.50 (Petroleum ether/Ethyl acetate = 2/1).

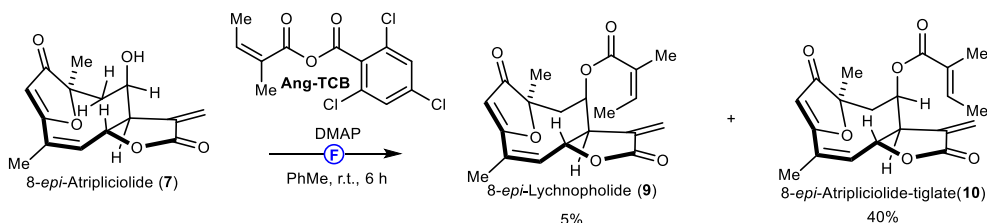

To a stirred solution of alcohol **7** (1.5 mg, 0.005 mmol) in PhMe (1.0 mL) was added angelic 2,4,6-trichlorobenzoic anhydride (**Ang-TCB**, 4.6 mg, 0.015 mmol) and DMAP (1.8 mg, 0.016 mmol). The reaction mixture was stirred at room temperature for 6 hours or till the TLC analysis showed disappearance of starting material. Then, the reaction was filtered and concentrated *in vacuo*. The residue was purified on silica gel chromatography (Pentane/Ethyl acetate = 10/1  $\sim$  3/1) to provide compound **9** as a waxy solid (<0.1 mg,  $\sim$ 5%) together with 8-epi-atripliciolide-tiglate **10** (0.8 mg, 40%).

We observed major isomerization from angelate to tiglate (angelate/tiglate = 1/8 as determined by crude  $^1\text{H}$  NMR). Unfortunately, the material obtained was not enough for full characterization, but  $^1\text{H}$  NMR data comparison showed unequivocally the compound to be natural product **9**. See **Table S9** for detail.

Data of **9**: waxy solid;

HRMS(ESI)  $[\text{M} + \text{H}]^+$  calculated for  $\text{C}_{20}\text{H}_{23}\text{O}_6$ : 359.1495, found: 359.1517;

TLC:  $R_f$  = 0.50 (Petroleum ether/Ethyl acetate = 2/1).

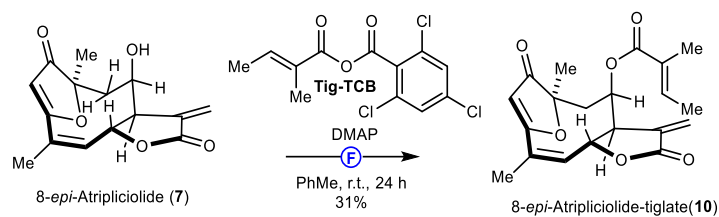

To a stirred solution of alcohol **7** (1.5 mg, 0.005 mmol) in PhMe (1.0 mL) was added tiglic 2,4,6-trichlorobenzoic anhydride (**Tig-TCB**, 4.6 mg, 0.015 mmol) and DMAP (1.8 mg, 0.016 mmol). The reaction mixture was stirred at room temperature for 24 hours till the TLC analysis showed disappearance of the starting material. Then the reaction was filtered and concentrated *in vacuo*. The residue was purified on silica gel chromatography (Pentane/Ethyl acetate = 10/1 ~ 3/1) to provide 8-*epi*-atrapiolicolide-tiglate **10** (0.5 mg, 31%) as a waxy solid.

Data of 8-*epi*-atrapiolicolide-tiglate **10**: waxy solid;

$[\alpha]_D^{20}$  -204.4 (c 0.025, CHCl<sub>3</sub>);

<sup>1</sup>H NMR and <sup>13</sup>C NMR data, see **Table S10**;

IR (film, cm<sup>-1</sup>) 1767, 1710, 1594, 1291, 1127, 1080, 593;

HRMS(ESI) [M + H]<sup>+</sup> calculated for C<sub>20</sub>H<sub>23</sub>O<sub>6</sub>: 359.1495, found: 359.1478;

TLC: R<sub>f</sub> = 0.55 (Petroleum ether/Ethyl acetate = 2/1).

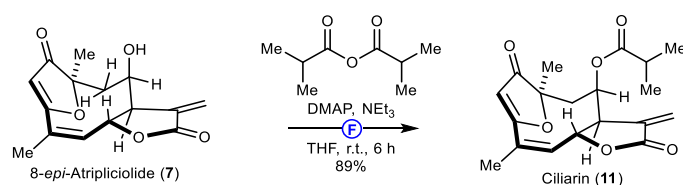

To a stirred solution of alcohol **7** (1.5 mg, 0.005 mmol) in THF (1.0 mL) was added NEt<sub>3</sub> (25 μL, 0.18 mmol) and isobutyric anhydride (13 μL, 0.08 mmol) followed by a trace of DMAP. The reaction mixture was stirred at room temperature for 6 hours till the TLC analysis showed disappearance of the starting material. The reaction was then quenched with *sat. aq.* NaHCO<sub>3</sub> (2.0 mL), the mixture was extracted with ethyl acetate (2 × 5.0 mL), the combined organic layers were dried over Na<sub>2</sub>SO<sub>4</sub>, then filtered and concentrated *in vacuo*. The residue was purified on silica gel chromatography (Pentane/Ethyl acetate = 10/1 ~ 3/1) to provide the **11** as a waxy solid (1.6 mg, 89%).

Data of **11**: waxy solid;

$[\alpha]_D^{20}$  -132.1 (c 0.10, CHCl<sub>3</sub>);

<sup>1</sup>H NMR and <sup>13</sup>C NMR data see **Table S11**;

IR (film, cm<sup>-1</sup>) 1770, 1706, 1592, 1290, 1144;

HRMS(ESI) [M + Na]<sup>+</sup> calculated for C<sub>19</sub>H<sub>22</sub>NaO<sub>6</sub>: 369.1323, found: 369.1314;

TLC: R<sub>f</sub> = 0.50 (Petroleum ether/Ethyl acetate = 2/1).

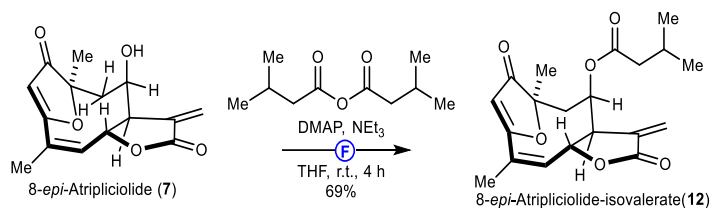

To a stirred solution of alcohol **7** (1.0 mg, 0.0036 mmol) in THF (0.5 mL) was added NEt<sub>3</sub> (15  $\mu$ L, 0.11 mmol) and isovaleric anhydride (10  $\mu$ L, 0.05 mmol) followed by a trace of DMAP. The reaction mixture was stirred at room temperature for 4 hours till the TLC analysis showed disappearance of the starting material. The reaction was then quenched with *sat. aq.* NaHCO<sub>3</sub> (2.0 mL), the mixture was extracted with ethyl acetate (2  $\times$  5.0 mL), the combined organic layers were dried over Na<sub>2</sub>SO<sub>4</sub>, then filtered and concentrated *in vacuo*. The residue was purified on silica gel chromatography (Pentane/Ethyl acetate = 10/1 ~ 2/1) to provide the **12** as waxy solid (0.9 mg, 69%).

Data of **12**: waxy solid;

$[\alpha]_D^{20}$  -51.8 (c 0.045, CHCl<sub>3</sub>); lit.  $[\alpha]_D^{24}$  -41 (c 0.8, CHCl<sub>3</sub>) (*Phytochemistry*, **1978**, *17*, 471-474.);

<sup>1</sup>H NMR and <sup>13</sup>C NMR data, see **Table S12**;

IR (film, cm<sup>-1</sup>) 2960, 1770, 1739, 1709, 1595, 1291, 1162, 1130, 1005, 815;

HRMS(ESI) [M + H]<sup>+</sup> calculated for C<sub>20</sub>H<sub>25</sub>O<sub>6</sub>: 361.1651, found: 361.1625;

TLC: R<sub>f</sub> = 0.60 (Petroleum ether/Ethyl acetate = 2/1).

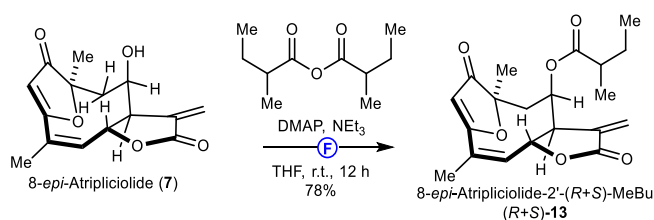

To a stirred solution of alcohol **7** (1.4 mg, 0.0051 mmol) in THF (0.5 mL) was added NEt<sub>3</sub> (15  $\mu$ L, 0.11 mmol) and ( $\pm$ )-2-methylbutyric anhydride (10  $\mu$ L, 0.05 mmol) followed by a trace of DMAP. The reaction mixture was stirred at room temperature for 12 hours till the TLC analysis showed disappearance of the starting material. The reaction was then quenched with *sat. aq.* NaHCO<sub>3</sub> (2.0 mL), the mixture was extracted with ethyl acetate (2  $\times$  5.0 mL), the combined organic layers were dried over Na<sub>2</sub>SO<sub>4</sub>, then filtered and concentrated *in vacuo*. The residue was purified on silica gel chromatography (Pentane/Ethyl acetate = 10/1 ~ 2/1) to provide the (*R+S*)-**13** as a waxy solid and a mixture 1:1 of inseparable diastereomers (1.4 mg, 78%).

Data of (*R+S*)-**13**: waxy solid;

<sup>1</sup>H NMR and <sup>13</sup>C NMR data, see **Supplementary Section d**;

HRMS(ESI) [M + Na]<sup>+</sup> calculated for C<sub>20</sub>H<sub>24</sub>NaO<sub>6</sub>: 383.1471, found: 383.1475;

TLC: R<sub>f</sub> = 0.70 (Petroleum ether/Ethyl acetate = 2/1).

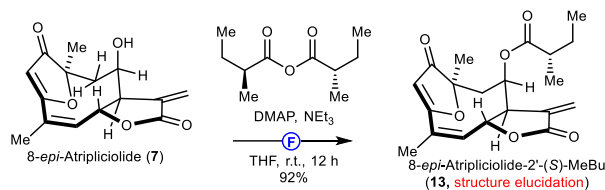

The same procedure for synthesis of (*R,S*)-**13** was used and 1.2 mg of 8-*epi*-atrapiocolide-2'-(*S*)-MeBu (**13**) were obtained from 1.0 mg of **7**, representing a yield of 92%.

Data of 8-*epi*-atrapiocolide-2'-(*S*)-MeBu **13**: waxy solid;

$[\alpha]_D^{20}$  -47.3 (c 0.06, CHCl<sub>3</sub>);

<sup>1</sup>H NMR and <sup>13</sup>C NMR data, see **Supplementary Section d**;

IR (film, cm<sup>-1</sup>) 2912, 2193, 1982, 1595, 1263, 1132, 1023, 800;

TLC: R<sub>f</sub> = 0.70 (Petroleum ether/Ethyl acetate = 2/1).

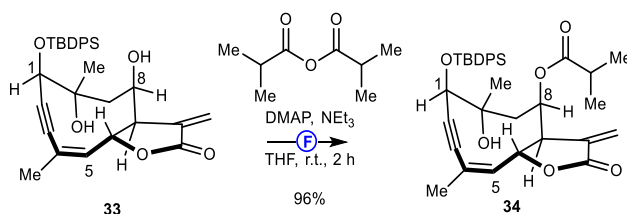

To a stirred solution of alcohol **33** (11 mg, 0.021 mmol) in THF (2.0 mL) was added NEt<sub>3</sub> (18 μL, 0.13 mmol) and isobutyric anhydride (11 μL, 0.06 mmol) followed by a trace of DMAP. The reaction mixture was stirred at room temperature for 2 hours till the TLC analysis showed disappearance of the starting material. The reaction was then quenched with *sat. aq.* NaHCO<sub>3</sub> (2.0 mL), the mixture was extracted with ethyl acetate (3 × 10 mL), the combined organic layers were dried over Na<sub>2</sub>SO<sub>4</sub>, then filtered and concentrated *in vacuo*. The residue was purified on silica gel chromatography (Pentane/Ethyl acetate = 5/1 ~ 2/1) to provide **34** as a white solid (12 mg, 96%).

The absolute configuration of **34** was determined by X-ray diffraction measurements. Single crystals of **34** suitable for X-ray crystallographic analysis were obtained by a single recrystallization by slow evaporation at room temperature using *n*-hexanes/CH<sub>2</sub>Cl<sub>2</sub> as a solvent mixture. See **Supplementary Section m** for detail.

Data of **53**: white solid, m.p. 154-156 °C;

$[\alpha]_D^{20}$  -669.7 (c 0.2, CHCl<sub>3</sub>);

<sup>1</sup>H NMR (500 MHz, CDCl<sub>3</sub>) δ 7.73-7.57 (m, 4H, -OTBDPS), 7.53-7.32 (m, 6H, -OTBDPS), 6.25 (d, *J* = 2.2 Hz, 1H, H<sub>13</sub>), 5.88 (dq, *J* = 3.3, 1.6 Hz, 1H, H<sub>5</sub>), 5.72 (br s, 1H, H<sub>13</sub>), 5.39 (br s, 2H, H<sub>6</sub> + H<sub>8</sub>), 4.01 (s, 1H, H<sub>1</sub>), 3.68 (br s, 1H, H<sub>7</sub>), 2.81 (dd, *J* = 15.0, 9.7 Hz, 1H, H<sub>9</sub>), 2.49 (hept, *J* = 7.0 Hz, 1H, H<sub>2</sub>'), 1.72 (dd, *J* = 15.1, 3.9 Hz, 1H, H<sub>9</sub>), 1.63 (t, *J* = 1.7 Hz, 3H, H<sub>15</sub>), 1.42 (s, 3H, H<sub>14</sub>), 1.13 (d, *J* = 7.0 Hz, 3H, H<sub>3</sub>'/4'), 1.11 (d, *J* = 7.0 Hz, 3H, H<sub>3</sub>'/4'), 1.09 (s, 9H, -OTBDPS) ppm;

<sup>13</sup>C NMR (126 MHz, CDCl<sub>3</sub>) δ 176.5 (C<sub>1</sub>'), 170.5 (C<sub>12</sub>'), 140.4 (br, C<sub>5</sub>H), 137.2 (br C<sub>11</sub>'), 136.4 (TBDPS), 136.1 (TBDPS), 133.2 (TBDPS), 132.9 (TBDPS), 130.2 (TBDPS), 130.1 (TBDPS), 127.9 (TBDPS), 127.5 (TBDPS), 123.4 (C<sub>13</sub>H<sub>2</sub>'), 120.4 (br, C<sub>4</sub>'), 98.8 (C<sub>2</sub>'), 85.2 (br, C<sub>3</sub>'), 77.0 (C<sub>6</sub>H), 75.4 (C<sub>10</sub>'), 75.4 (C<sub>8</sub>H), 72.6 (C<sub>1</sub>H), 49.3 (br, C<sub>7</sub>H), 36.0 (C<sub>9</sub>H<sub>2</sub>'), 34.3 (C<sub>2</sub>H), 30.2 (C<sub>14</sub>H<sub>3</sub>'), 27.2 (TBDPS), 20.9 (C<sub>15</sub>H<sub>3</sub>'), 19.5 (TBDPS), 18.9 (C<sub>3</sub>H<sub>3</sub>'), 18.8 (C<sub>4</sub>H<sub>3</sub>) ppm; <sup>13</sup>C NMR

signal of C<sub>3</sub> C<sub>4</sub> C<sub>5</sub> C<sub>7</sub> C<sub>11</sub> are broad because of the conformational changes. <sup>13</sup>C NMR of C<sub>8</sub> and C<sub>10</sub> overlap, and C<sub>8</sub> most likely has very weak signal. <sup>1</sup>H NMR of H-6 and H-8 overlap and makes the NOESY hard to detect. There is a correlation between H-5 and H-7; IR (film, cm<sup>-1</sup>) 3475, 2933, 1753, 1428, 1111, 703; HRMS(ESI) [M + Na]<sup>+</sup> calculated for C<sub>35</sub>H<sub>42</sub>NaO<sub>6</sub>Si: 609.2661, found: 609.2648; TLC: R<sub>f</sub> = 0.85 (Petroleum ether/Ethyl acetate = 1/1).

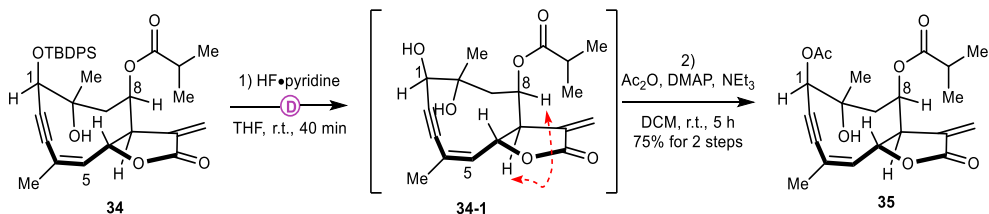

To a solution of TBDPS-protected alcohol **34** (13.6 mg, 0.023 mmol) in an Eppendorf safe-lock tube was added hydrogen fluoride pyridine (hydrogen fluoride ~70%, 0.1 mL). The reaction mixture was left on a shaker at room temperature for 40 minutes. Then CH<sub>2</sub>Cl<sub>2</sub> (2.0 mL) was added to the reaction mixture and followed by addition of *sat. aq.* NaHCO<sub>3</sub> for quenching (caution the mixture bubbles out while quenching) until the evolution of gas stopped. The mixture was extracted with ethyl acetate (3 × 10 mL), the combined organic layers were dried over Na<sub>2</sub>SO<sub>4</sub>, then filtered and concentrated *in vacuo*. The residue was used for acetylation without further purification. To a solution of crude propargyl alcohol **34-1** in CH<sub>2</sub>Cl<sub>2</sub> (1.0 mL) was added NEt<sub>3</sub> (16 μL, 0.12 mmol) and acetic anhydride (4.3 μL, 0.046 mmol) followed by a trace of DMAP. The reaction mixture was stirred at room temperature for 5 hours or till the TLC analysis showed disappearance of starting material. The reaction was then quenched with *sat. aq.* NaHCO<sub>3</sub> (2.0 mL), the mixture was extracted with CH<sub>2</sub>Cl<sub>2</sub> (3 × 10 mL), the combined organic layers were dried over Na<sub>2</sub>SO<sub>4</sub>, then filtered and concentrated *in vacuo*. The residue was purified on silica gel chromatography (Pentane/Ethyl acetate = 4/1) to provide **35** as waxy solid (7.7 mg, 75%).

Data of propargyl alcohol **34-1**: waxy solid;

[α]<sub>D</sub><sup>20</sup> -301.2 (c 0.06, CHCl<sub>3</sub>);

<sup>1</sup>H NMR (500 MHz, CDCl<sub>3</sub>) δ 6.28 (d, *J* = 2.3 Hz, 1H, H<sub>13</sub>), 6.02 (dq, *J* = 4.7, 1.6 Hz, 1H, H<sub>5</sub>), 5.77 (d, *J* = 2.1 Hz, 1H, H<sub>13</sub>), 5.48 (br s, 2H, H<sub>6</sub> + H<sub>8</sub>), 4.09 (d, *J* = 4.1 Hz, 1H, H<sub>1</sub>), 3.73 (br s, 1H, H<sub>7</sub>), 2.65 (dd, *J* = 15.2, 8.9 Hz, 1H, H<sub>9</sub>), 2.49 (hept, *J* = 7.0 Hz, 1H, H<sub>2'</sub>), 2.00 (d, *J* = 4.2 Hz, 1H, -OH), 1.85 (t, *J* = 1.7 Hz, 3H, H<sub>15</sub>), 1.73 (dd, *J* = 15.1, 4.2 Hz, 1H, H<sub>9</sub>), 1.49 (s, 3H, H<sub>14</sub>), 1.12 (d, *J* = 6.1 Hz, 3H, H<sub>3'/4'</sub>), 1.11 (d, *J* = 6.2 Hz, 3H, H<sub>3'/4'</sub>) ppm;

<sup>13</sup>C NMR (126 MHz, CDCl<sub>3</sub>) δ 176.5 (C<sub>1</sub>), 170.3 (C<sub>12</sub>), 141.0 (br, C<sub>5</sub>H), 136.9 (br, C<sub>11</sub>), 123.5 (C<sub>13</sub>H<sub>2</sub>), 120.4 (br, C<sub>4</sub>), 98.4 (C<sub>2</sub>), 85.1 (br, C<sub>3</sub>), 77.1 (C<sub>6</sub>H), 74.8 (C<sub>10</sub>), 74.8 (C<sub>8</sub>H), 71.0 (C<sub>1</sub>H), 49.4 (C<sub>7</sub>H), 35.8 (C<sub>9</sub>H<sub>2</sub>), 34.3 (C<sub>2</sub>H), 29.6 (C<sub>14</sub>H<sub>3</sub>), 21.0 (C<sub>15</sub>H<sub>3</sub>), 18.9 (C<sub>3</sub>H<sub>3</sub>), 18.8 (C<sub>4</sub>H<sub>3</sub>) ppm; <sup>13</sup>C NMR signal of C<sub>3</sub> C<sub>4</sub> C<sub>5</sub> C<sub>11</sub> are broad because of the conformational changes. <sup>13</sup>C NMR of C<sub>8</sub> and C<sub>10</sub> overlap, and C<sub>8</sub> most likely has very weak signal. <sup>1</sup>H NMR of H-6 and H-8 overlap and makes the NOESY hard to be detected;

IR (film, cm<sup>-1</sup>) 3441, 2977, 1752, 1270, 1200, 1147, 1008;

HRMS(ESI) [M + Na]<sup>+</sup> calculated for C<sub>19</sub>H<sub>24</sub>NaO<sub>6</sub>: 371.1472, found: 371.1471;

TLC: R<sub>f</sub> = 0.20 (Petroleum ether/Ethyl acetate = 3/1).

Data of **35**: waxy solid;

$[\alpha]_D^{20}$  -219.7 (c 0.2, CHCl<sub>3</sub>);

<sup>1</sup>H NMR (500 MHz, CDCl<sub>3</sub>) δ 6.28 (d, *J* = 2.3 Hz, 1H, *H*<sub>13</sub>), 6.04 (dq, *J* = 4.7, 1.6 Hz, 1H, *H*<sub>5</sub>), 5.78 (d, *J* = 2.1 Hz, 1H, *H*<sub>13</sub>), 5.48 (br s, 2H, *H*<sub>6</sub> + *H*<sub>8</sub>), 5.08 (s, 1H, *H*<sub>1</sub>), 3.74 (br s, 1H, *H*<sub>7</sub>), 2.67 (dd, *J* = 15.1, 8.9 Hz, 1H, *H*<sub>9</sub>), 2.49 (hept, *J* = 7.0 Hz, 1H, *H*<sub>2</sub>'), 2.12 (s, 3H, -OAc), 1.84 (t, *J* = 1.7 Hz, 3H, *H*<sub>15</sub>), 1.79 (dd, *J* = 15.1, 4.2 Hz, 1H, *H*<sub>9</sub>), 1.42 (s, 3H, *H*<sub>14</sub>), 1.12 (like t, *J* = 7.0, 6H, *H*<sub>3</sub>' + *H*<sub>4</sub>') ppm;

<sup>13</sup>C NMR (126 MHz, CDCl<sub>3</sub>) δ 176.5 (*C*<sub>1</sub>'), 170.3 (*C*<sub>12</sub>'), 169.6 (OAc), 141.5 (br, *C*<sub>5</sub>H), 136.9 (br, *C*<sub>11</sub>'), 123.6 (*C*<sub>13</sub>H<sub>2</sub>'), 120.4 (br, *C*<sub>4</sub>'), 95.3 (*C*<sub>2</sub>'), 85.0 (br, *C*<sub>3</sub>'), 77.0 (*C*<sub>6</sub>H), 74.5 (*C*<sub>8</sub>H), 74.0 (*C*<sub>10</sub>'), 71.2 (*C*<sub>1</sub>H), 49.4 (*C*<sub>7</sub>H), 36.8 (*C*<sub>9</sub>H<sub>2</sub>'), 34.3 (*C*<sub>2</sub>H), 29.6 (*C*<sub>14</sub>H<sub>3</sub>'), 21.0 (OAc), 20.9 (*C*<sub>15</sub>H<sub>3</sub>'), 18.9 (*C*<sub>3</sub>H<sub>3</sub>'), 18.8 (*C*<sub>4</sub>H<sub>3</sub>') ppm; <sup>13</sup>C NMR signal of *C*<sub>3</sub> *C*<sub>4</sub> *C*<sub>5</sub> *C*<sub>8</sub> *C*<sub>11</sub> are broad and *C*<sub>8</sub> disappears because of the conformational changes. <sup>13</sup>C NMR of *C*<sub>8</sub> can be detected by weak HSQC. <sup>1</sup>H NMR of H-6 and H-8 overlap and what makes the NOESY correlation hard to be detected;

IR (film, cm<sup>-1</sup>) 2926, 2230, 1743, 1223, 1006;

HRMS(ESI) [*M* + Na]<sup>+</sup> calculated for C<sub>21</sub>H<sub>26</sub>NaO<sub>7</sub>: 413.1579, found: 413.1576;

TLC: R<sub>f</sub> = 0.50 (Petroleum ether/Ethyl acetate = 3/1).

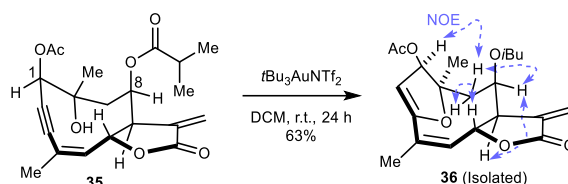

To a solution of **35** (3.0 mg, 0.0077 mmol) in CH<sub>2</sub>Cl<sub>2</sub> (1.0 mL) was added *t*Bu<sub>3</sub>AuNTf<sub>2</sub> (0.3 mg, 0.0004 mmol) and stirred for 24 hours or till the TLC analysis showed disappearance of the starting material. The resulted solution was concentrated *in vacuo*. The residue was purified on NEt<sub>3</sub> pre-treated silica gel chromatography (Pentane/Ethyl acetate = 5/1~3/1) to provide the **36** as a waxy solid (1.9 mg, 63%).

The low isolated yield of **36** may result from the instability under acidic conditions.

Data of **36**: waxy solid;

$[\alpha]_D^{20}$  -333.8 (c 0.1, CHCl<sub>3</sub>);

<sup>1</sup>H NMR (500 MHz, CDCl<sub>3</sub>) δ 6.28 (d, *J* = 2.6 Hz, 1H, *H*<sub>13</sub>), 5.85 (d, *J* = 1.4 Hz, 1H, *H*<sub>1</sub>), 5.73 (dq, *J* = 3.6, 1.7 Hz, 1H, *H*<sub>5</sub>), 5.62 (d, *J* = 2.3 Hz, 1H, *H*<sub>13</sub>), 5.56 (dt, *J* = 11.5, 4.5 Hz, 1H, *H*<sub>8</sub>), 5.37 (dq, *J* = 4.0, 2.0 Hz, 1H, *H*<sub>6</sub>), 4.99 (d, *J* = 1.4 Hz, 1H, *H*<sub>2</sub>'), 3.94 (tt, *J* = 4.1, 2.4 Hz, 1H, *H*<sub>7</sub>), 2.84 (dd, *J* = 14.6, 11.5 Hz, 1H, *H*<sub>9</sub>), 2.44 (hept, *J* = 7.0 Hz, 1H, *H*<sub>2</sub>'), 2.08 (s, 3H, -OAc), 1.88 (t, *J* = 1.8 Hz, 3H, *H*<sub>15</sub>), 1.65 (s, 3H, *H*<sub>14</sub>'), 1.62 (dd, *J* = 14.6, 4.7 Hz, 1H, *H*<sub>9</sub>), 1.07 (d, *J* = 6.9 Hz, 3H, *H*<sub>3</sub>'), 1.05 (d, *J* = 7.0 Hz, 3H, *H*<sub>4</sub>') ppm;

<sup>13</sup>C NMR (126 MHz, CDCl<sub>3</sub>) δ 176.3 (*C*<sub>1</sub>'), 170.7 (OAc), 169.9 (*C*<sub>12</sub>'), 157.7 (*C*<sub>3</sub>'), 136.0 (*C*<sub>11</sub>'), 133.1 (*C*<sub>5</sub>H), 130.6 (*C*<sub>4</sub>'), 123.3 (*C*<sub>13</sub>H<sub>2</sub>'), 100.8 (*C*<sub>2</sub>'), 87.9 (*C*<sub>10</sub>'), 84.9 (*C*<sub>1</sub>H), 75.6 (*C*<sub>6</sub>H), 71.6 (*C*<sub>8</sub>H), 50.0 (*C*<sub>7</sub>H), 34.2 (*C*<sub>2</sub>H), 32.1 (*C*<sub>9</sub>H<sub>2</sub>'), 22.8 (*C*<sub>14</sub>H<sub>3</sub>'), 21.5 (*C*<sub>15</sub>H<sub>3</sub>'), 21.1 (OAc), 19.2 (*C*<sub>3</sub>H<sub>3</sub>'), 18.8 (*C*<sub>4</sub>H<sub>3</sub>') ppm;

IR (film, cm<sup>-1</sup>) 2924, 1768, 1738, 1462, 1375, 1281, 1230, 1135, 1034, 1004;

HRMS(ESI) [*M* + H]<sup>+</sup> calculated for C<sub>21</sub>H<sub>27</sub>O<sub>7</sub>: 391.1729, found: 391.1757;

TLC: R<sub>f</sub> = 0.60 (Petroleum ether/Ethyl acetate = 3/1).

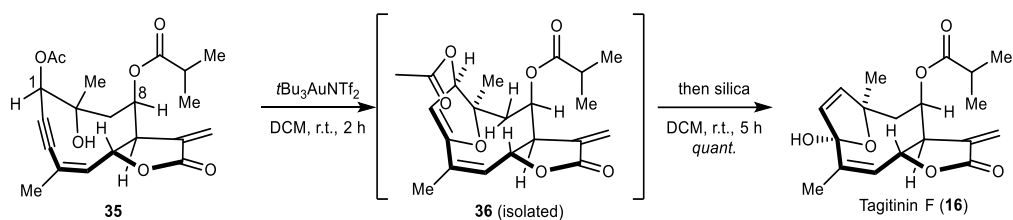

To a solution of **35** (1.9 mg, 0.0049 mmol) in CH<sub>2</sub>Cl<sub>2</sub> (0.5 mL) was added *t*Bu<sub>3</sub>AuNTf<sub>2</sub> (0.2 mg, 0.00024 mmol) and stirred for 2 hours till the TLC analysis showed disappearance of the starting material. Then silica gel (cat. 2.0 mg) was added to the solution and stirred at same temperature for 5 hours. The residue was directly purified on silica gel chromatography (Pentane/Ethyl acetate = 2/1) to provide the tagitinine F (**16**) as a waxy solid (1.7 mg, *quant.*).

Data of tagitinine F **16**: waxy solid;

[ $\alpha$ ]<sub>D</sub><sup>20</sup> -117.8 (c 0.075, MeOH); lit. [ $\alpha$ ]<sub>D</sub><sup>24</sup> -12.5 (c 0.1, MeOH) (*Photochem. Photobiol.*, **2020**, *96*, 14-20.);

<sup>1</sup>H NMR and <sup>13</sup>C NMR data, see **Table S15**;

IR (film, cm<sup>-1</sup>) 3453, 2972, 2927, 1759, 1736, 1280, 1148, 1099, 1063, 1021, 982;

HRMS(ESI) [M + Na]<sup>+</sup> calculated for C<sub>19</sub>H<sub>24</sub>NaO<sub>6</sub>: 371.1472, found: 371.1471;

TLC: R<sub>f</sub> = 0.55 (Petroleum ether/Ethyl acetate = 1/1).

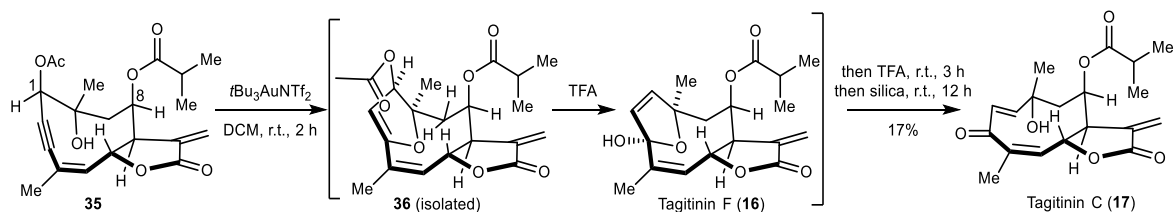

To a solution of **35** (2.0 mg, 0.0051 mmol) in CDCl<sub>3</sub> (0.5 mL) in NMR tube was added *t*Bu<sub>3</sub>AuNTf<sub>2</sub> (0.2 mg, 0.00024 mmol) and left on a shaker for 2 hours till the crude <sup>1</sup>H NMR analysis showed disappearance of the starting material and formation of **36**. Then TFA (1  $\mu$ L, 0.013 mmol) was added to the solution and the tube was left on shaker at same temperature for 3 hours. Crude <sup>1</sup>H NMR showed formation tagitinine F **16**. The residue was treated with silica (cat. 2.0 mg) and left of shaker for another 12 hours. The crude <sup>1</sup>H NMR showed disappearance of tagitinine F. The resulted mixture was directly purified on silica gel chromatography (Pentane/Ethyl acetate = 5/1~2/1) to provide the tagitinine C **17** as awaxy solid (0.3 mg, 17%) together with other compounds. Similar reaction with CH<sub>2</sub>Cl<sub>2</sub> as solvent was repeated and same result was obtained.



**Figure S7.** Reaction pathway-crude  $^1\text{H}$  NMR monitoring.

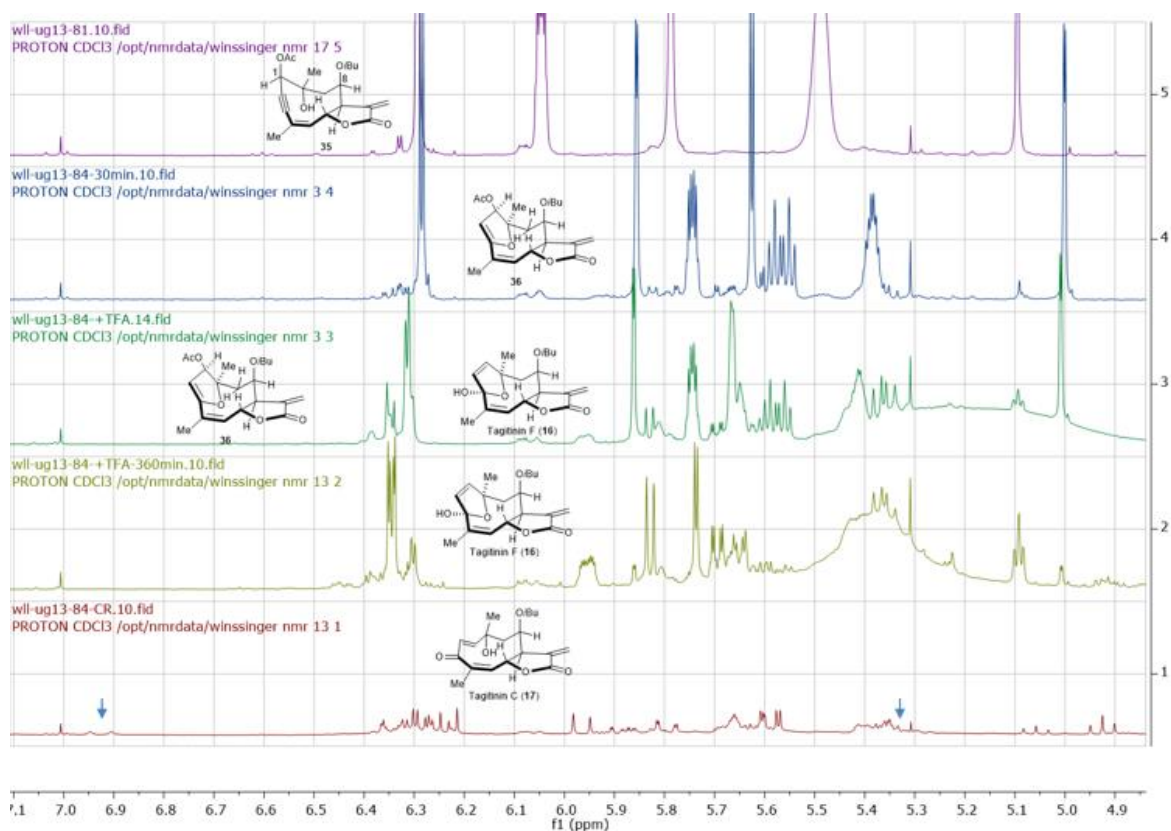

When **35** (wll-ug13-81) is treated with  $t\text{Bu}_3\text{AuNTf}_2$ , cyclization happens fast to give **36** (wll-ug13-84-30min). This reaction is accomplished within 2 hours depending on the amount of the catalyst. When the cyclized product **36** is treated with TFA and the transformation to tagitinin F **16** happens gradually (wll-ug13-84+TFA/wll-ug13-84+TFA-360min), which indicating that TFA plays a similar function as silica gel. Addition of silica gel induces yet a different reaction. Directing monitoring by  $^1\text{H}$  NMR gives no signals because all the compounds are adsorbed by the silica gel. A Simple filtration followed by a wash with ethyl acetate followed by concentration shows the unequivocal formation of tagitinin C **17** together with two other compounds (wll-ug13-84-CR), in a ratio of **20**: compound 1 : compound 2 = 1:2:1.

**Figure S8.** Proposed mechanism.

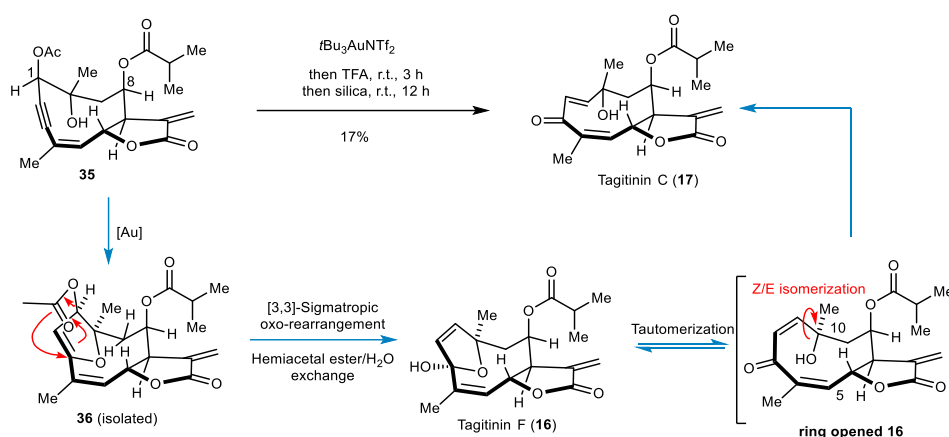

When **35** is treated with the gold catalyst, the alkyne could be activated inducing the cyclization between C10-OH and alkyne-C3 giving **36**. Then reaction would be slower than when C1 is a ketone. Compound **36** is not stable and a [3,3]-Sigmatropic oxo-rearrangement/ Hemiactal ester/H<sub>2</sub>O exchange could give rise to tagitinine F **16**. Tautomerizaation then could generate the enone **ring opened 16**. Tagitinine C **17** could derive from a Z/E isomerization of the 1,2-double bond. The cocktail of TFA and silica would be necessary for this reaction. A control experiment was also conducted where TFA itself lead to no transformation without silica gel under various conditions (heat, light, etc).

Data of tagitinine C **17**: waxy solid;

$[\alpha]_D^{20}$  -268.8 (c 0.07, MeOH); lit.  $[\alpha]_D^{24}$  -23.5 (c 0.1, MeOH) (*Photochem. Photobiol.*, **2020**, *96*, 14-20.);

<sup>1</sup>H NMR and <sup>13</sup>C NMR data see **Table S16**;

IR (film, cm<sup>-1</sup>) 3480, 2974, 2927, 1768, 1736, 1656, 1121, 993;

HRMS(ESI) [M + Na]<sup>+</sup> calculated for C<sub>19</sub>H<sub>24</sub>NaO<sub>6</sub>: 371.1472, found: 371.1471;

TLC: R<sub>f</sub> = 0.50 (Petroleum ether/Ethyl acetate = 1/1).

## g) Experimental procedures for Scheme 2

**Figure S9.** Synthesis of 5-*epi*-isogoyazensolide (**15**) from **37** and **20a**.

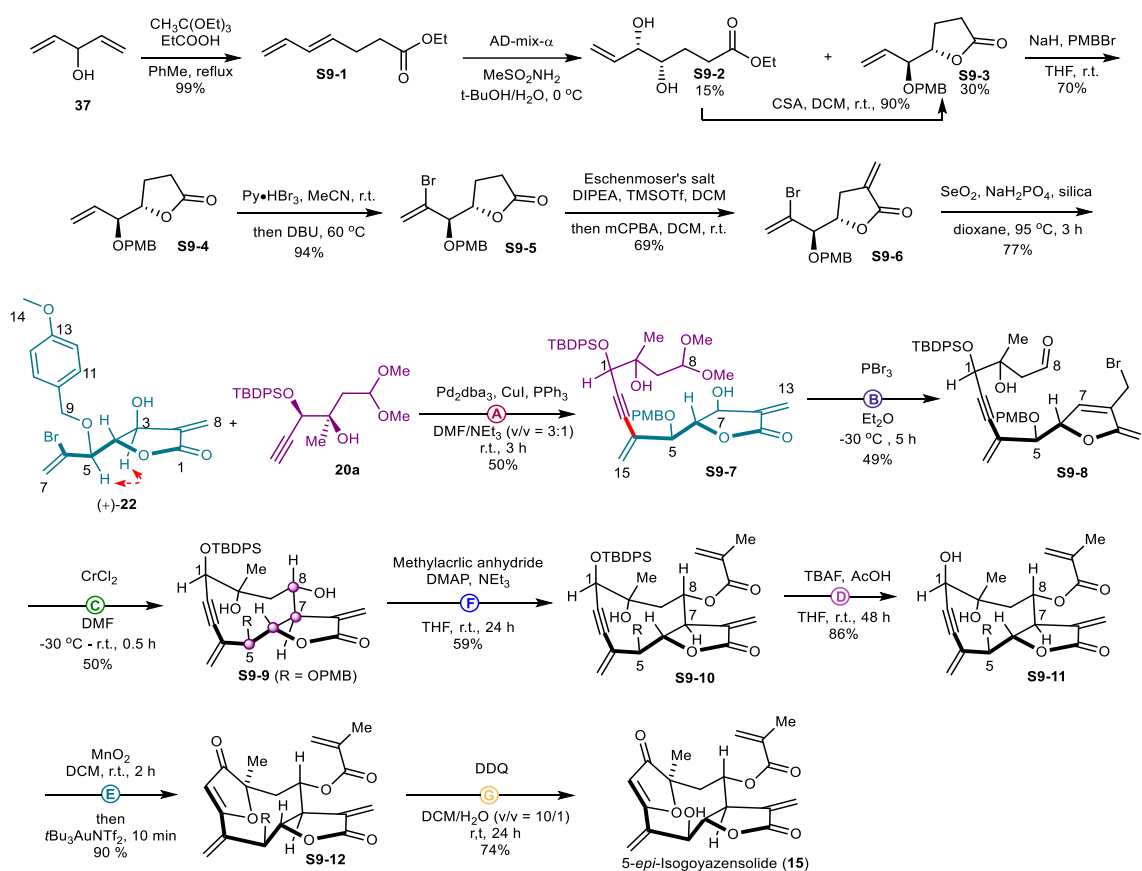

Lactone **S9-6** is a known compound and was prepared in 5 steps from **37** as previously reported.<sup>25</sup>

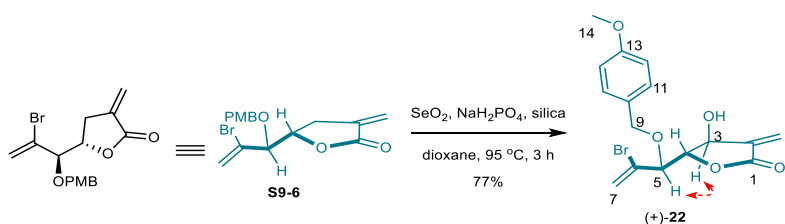

To a stirred solution of lactone **S9-6** (1.7 g, 4.8 mmol),  $\text{NaH}_2\text{PO}_4$  (2.5 g, 20.8 mmol) and silica (5.0 g) in dioxane (50 mL) was added  $\text{SeO}_2$  (2.5 g, 22.5 mmol) in 3 portions at  $95^\circ\text{C}$  within 2 hours. The reaction mixture was stirred for 1 more hour and then cooled down to room temperature. Then dioxane was evaporated and  $\text{Et}_2\text{O}$  (200 mL) was added, the mixture was stirred for 30 minutes, filtered and the solution was washed with saturated aqueous  $\text{NaHCO}_3$  (100 mL), diluted  $\text{Na}_2\text{S}$  (10 mL) and brine (50 mL). The organic layer was dried over  $\text{Na}_2\text{SO}_4$ , then filtered and concentrated *in vacuo*. The residue was purified

<sup>25</sup> Kutsumura, N., Kiriseko, A., Saito, T. *Heterocycles*, **2012**, *86*, 1367-1378.

on silica gel chromatography (Pentane/Ethyl acetate = 10/1 ~ 1/1) to provide **22** as light-yellow oil (1.36 g, 77 %), which gradually became solid in the fridge.

The structure of lactone **22** was fully elucidated based on 2D NMR spectroscopic analyses, indicating a *trans* product. See **Supplementary Section I** for detail information.

Data of lactone **22**: yellow oil to waxy solid;

$[\alpha]_D^{20}$  +43.3 (c 0.2, CHCl<sub>3</sub>);

<sup>1</sup>H NMR (400 MHz, CDCl<sub>3</sub>) δ 7.21 (m, 2H, *H*<sub>11</sub>), 6.89 (m, 2H, *H*<sub>12</sub>), 6.41 (d, *J* = 2.3 Hz, 1H, *H*<sub>8</sub>), 6.12 (dd, *J* = 2.1, 1.0 Hz, 1H, *H*<sub>7</sub>), 5.93 (d, *J* = 1.9 Hz, 1H, *H*<sub>8</sub>), 5.90 (dd, *J* = 2.0, 0.6 Hz, 1H, *H*<sub>7</sub>), 4.68 (d, *J* = 11.7 Hz, 1H, *H*<sub>9</sub>), 4.60 (ddt, *J* = 5.8, 4.1, 2.1 Hz, 1H, *H*<sub>3</sub>), 4.53 (t, *J* = 3.7 Hz, 1H, *H*<sub>4</sub>), 4.30 (d, *J* = 11.7 Hz, 1H, *H*<sub>9</sub>), 4.04 (ddd, *J* = 3.7, 1.1, 0.5 Hz, 1H, *H*<sub>5</sub>), 3.82 (s, 3H, *H*<sub>14</sub>), 2.09 (d, *J* = 6.1 Hz, 1H, -OH) ppm;

<sup>13</sup>C NMR (100 MHz, CDCl<sub>3</sub>) δ 168.2 (*C*<sub>1</sub>), 159.8 (*C*<sub>13</sub>), 138.4 (*C*<sub>2</sub>), 130.1 (*C*<sub>11</sub>H), 128.6 (*C*<sub>10</sub>), 127.3 (*C*<sub>6</sub>), 125.9 (*C*<sub>8</sub>H<sub>2</sub>), 121.4 (*C*<sub>7</sub>H<sub>2</sub>), 114.2 (*C*<sub>12</sub>H), 83.5 (*C*<sub>4</sub>H), 80.8 (*C*<sub>5</sub>H), 71.0 (*C*<sub>9</sub>H<sub>2</sub>), 70.1 (*C*<sub>3</sub>H), 55.5 (*C*<sub>14</sub>H<sub>3</sub>) ppm;

IR (film, cm<sup>-1</sup>) 3453, 1770, 1613, 1514, 1251, 1033, 818;

TLC: R<sub>f</sub> = 0.40 (Petroleum ether/Ethyl acetate = 2/1).

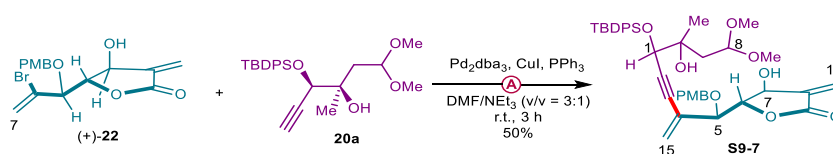

To a stirred solution of alkyne **20a** (51 mg, 0.12 mmol) and vinyl bromide **22** (40 mg, 0.11 mmol) in DMF/NEt<sub>3</sub> (3.0 mL/1 mL) was added Pd<sub>2</sub>dba<sub>3</sub> (20 mg, 0.022 mmol) and CuI (2 mg, 0.011 mmol). The mixture was then stirred for 2 hours or till TLC analysis showed disappearance of the starting material. The reaction was quenched by addition of *sat. aq.* NH<sub>4</sub>Cl (10 mL) and extracted with ethyl acetate (3 × 20 mL). The combined organic layers were dried over Na<sub>2</sub>SO<sub>4</sub>, then filtered and concentrated *in vacuo*. The residue was purified on silica gel chromatography (Pentane/Ethyl acetate = 5/1 ~ 1/1) to provide enyne **S9-7** as a yellow oil (39 mg, 50%).

Data of enyne **S9-7**: yellow oil;

$[\alpha]_D^{20}$  -40.2 (c 0.5, CHCl<sub>3</sub>);

<sup>1</sup>H NMR (400 MHz, CDCl<sub>3</sub>) δ 7.75-7.73 (m, 4H, TBDPS), 7.44-7.33 (m, 6H, TBDPS), 7.19 (like d, *J* = 8.6 Hz, 2H, PMB), 6.87 (like d, *J* = 8.7 Hz, 2H, PMB), 6.32 (d, *J* = 2.6 Hz, 1H, *H*<sub>7</sub>), 5.81 (d, *J* = 2.1 Hz, 1H, *H*<sub>7</sub>), 5.53 (br t, *J* = 1.3 Hz, 1H, *H*<sub>15</sub>), 5.40 (br s, 1H, *H*<sub>15</sub>), 4.65 (dd, *J* = 6.5, 4.6 Hz, 1H, *H*<sub>8</sub>), 4.53 (d, *J* = 11.6 Hz, 1H, PMB), 4.49 (br s, 1H, *H*<sub>7</sub>), 4.35 (s, 1H, *H*<sub>1</sub>), 4.25-4.14 (m, 2H, PMB + *H*<sub>6</sub>), 3.81 (s, 3H, PMB), 3.71 (br d, *J* = 5.4 Hz, 1H, *H*<sub>5</sub>), 3.26 (s, 3H, C<sub>8</sub>-OMe), 3.25 (s, 3H, C<sub>8</sub>-OMe), 2.11 (dd, *J* = 14.6, 6.6 Hz, 1H, *H*<sub>9</sub>), 1.91 (dd, *J* = 14.6, 4.6 Hz, 1H, *H*<sub>7</sub>), 1.34 (s, 3H, *H*<sub>14</sub>), 1.09 (s, 9H, TBDPS) ppm;

<sup>13</sup>C NMR (100 MHz, CDCl<sub>3</sub>) δ 168.2 (*C*<sub>12</sub>), 159.6 (PMB-C), 138.6 (*C*<sub>11</sub>), 136.3 (TBDPS), 136.2 (TBDPS), 133.5 (TBDPS), 132.6 (TBDPS), 130.2 (TBDPS), 129.9 (TBDPS), 129.7 (PMB-CH), 129.3 (PMB-C), 127.9 (TBDPS), 127.6 (TBDPS), 126.0 (*C*<sub>15</sub>H<sub>2</sub>), 125.8 (*C*<sub>4</sub>), 125.0 (*C*<sub>13</sub>H<sub>2</sub>), 114.0 (PMB-CH), 102.4 (*C*<sub>8</sub>H), 90.9 (*C*<sub>2</sub>), 85.0 (*C*<sub>6</sub>H), 84.7 (*C*<sub>3</sub>), 79.5 (*C*<sub>5</sub>H), 74.3 (*C*<sub>10</sub>), 71.4 (*C*<sub>1</sub>H), 70.6 (PMB-CH<sub>2</sub>), 69.5 (*C*<sub>7</sub>H), 55.5 (PMB-CH<sub>3</sub>), 53.6 (C<sub>8</sub>-OMe), 52.8 (C<sub>8</sub>-OMe), 39.4 (*C*<sub>9</sub>H<sub>2</sub>), 27.1 (TBDPS), 24.0 (*C*<sub>14</sub>H<sub>3</sub>), 19.6 (TBDPS) ppm;

IR (film, cm<sup>-1</sup>) 3434, 2935, 2860, 1768, 1613, 1514, 1450, 1112, 821, 705;

HRMS(ESI)  $[M + Na]^+$  calculated for  $C_{41}H_{50}NaO_9Si$ : 737.3122, found: 737.3108;  
 TLC: Rf = 0.10 (Pentane/Ethyl acetate = 2/1).

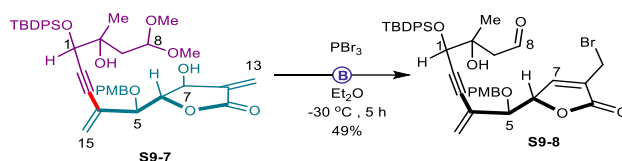

A 10 mL round bottom flask equipped with a magnetic stir bar was charged with enyne **S9-7** (30 mg, 0.042 mmol) and  $Et_2O$  (3.0 mL). The reaction was cooled down to  $-30\text{ }^\circ\text{C}$  and  $PBr_3$  (7  $\mu\text{L}$ , 0.084 mmol) was added. The mixture was stirred for 5 hours or till the LC-MS analysis showed disappearance of the starting material. Then the reaction was quenched with water (5.0 mL) and extracted with  $Et_2O$  ( $3 \times 10\text{ mL}$ ). The combined organic layers were dried over  $Na_2SO_4$ , then filtered and concentrated *in vacuo*. The residue was purified on silica gel chromatography (Pentane/Ethyl acetate = 3/1 ~ 1/1) to provide bromolactone **S9-8** as a colorless oil (15 mg, 49%).

Data of bromolactone **S9-8**: colorless oil;

$[\alpha]_D^{20}$  -59.2 (c 0.1,  $CHCl_3$ );

$^1H$  NMR (300 MHz,  $CDCl_3$ )  $\delta$  9.85 (t,  $J = 2.5\text{ Hz}$ , 1H,  $H_9$ ), 7.78 – 7.66 (m, 4H, *TBDPS*), 7.45 – 7.35 (m, 6H, *TBDPS*), 7.18 (like d,  $J = 8.6\text{ Hz}$ , 2H, *PMB*), 6.98 (m, 1H,  $H_7$ ), 6.87 (like d,  $J = 8.5\text{ Hz}$ , 2H, *PMB*), 5.42 (br s, 1H,  $H_{15}$ ), 5.30 (br s, 1H,  $H_{15}$ ), 4.72 (dd,  $J = 5.8, 1.6\text{ Hz}$ , 1H,  $H_6$ ), 4.50 (d,  $J = 11.5\text{ Hz}$ , 1H, *PMB*), 4.38 (s, 1H,  $H_1$ ), 4.21 (d,  $J = 11.5\text{ Hz}$ , 1H, *PMB*), 3.93 (dt,  $J = 6.8, 1.4\text{ Hz}$ , 2H,  $H_{13}$ ), 3.81 (s, 3H, *PMB*), 3.73 (d,  $J = 5.7\text{ Hz}$ , 1H,  $H_5$ ), 2.78 – 2.70 (m, 1H,  $H_9$ ), 2.66 (dd,  $J = 15.6, 2.9\text{ Hz}$ , 1H,  $H_9$ ), 1.44 (s, 3H,  $H_{14}$ ), 1.07 (s, 9H, *TBDPS*) ppm;

$^{13}C$  NMR (100 MHz,  $CDCl_3$ )  $\delta$  202.1 ( $C_8H$ ), 170.6 ( $C_{12}$ ), 159.7 (*PMB-C*), 149.7 ( $C_7H$ ), 136.2 (*TBDPS*), 136.0 (*TBDPS*), 133.3 (*TBDPS*), 132.0 (*TBDPS* +  $C_{11}$ ), 130.5 (*TBDPS*), 130.0 (*TBDPS*), 129.8 (*PMB-CH*), 128.9 (*PMB-C*), 128.1 (*TBDPS*), 127.6 (*TBDPS*), 127.0 ( $C_{15}H_2$ ), 125.8 ( $C_4$ ), 114.1 (*PMB-CH*), 90.4 ( $C_2$ ), 85.2 ( $C_3$ ), 81.5 ( $C_6H$ ), 80.0 ( $C_5H$ ), 74.8 ( $C_{10}$ ), 71.6 ( $C_1H$ ), 70.8 (*PMB-CH*<sub>2</sub>), 55.5 (*PMB-CH*<sub>3</sub>), 50.7 ( $C_9H_2$ ), 27.0 (*TBDPS*), 23.7 ( $C_{14}H_3$ ), 20.9 ( $C_{13}H_2$ ), 19.6 (*TBDPS*) ppm;

IR (film,  $cm^{-1}$ ) 3457, 2942, 2314, 1977, 1768, 1513, 1248, 1108, 823, 705;

HRMS(ESI)  $[M + Na]^+$  calculated for  $C_{39}H_{43}BrNaO_7Si$ : 753.1859, found: 753.1861;

TLC: Rf = 0.50 (Pentane/Ethyl acetate = 2/1).

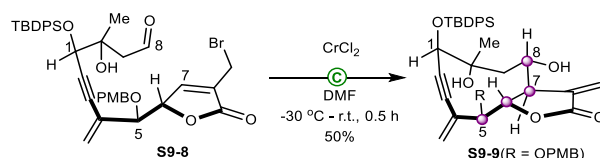

A 10 mL round bottom flask equipped with a magnetic stir bar was charged with bromolactone **S9-8** (15 mg, 0.02 mmol) and DMF (1.0 mL). The reaction mixture was cooled down to  $-30\text{ }^\circ\text{C}$  and  $CrCl_2$  (6.2 mg, 0.5 mmol) was added. The temperature was allowed to rise to room temperature and stirred for 30 minutes or till the TLC analysis showed disappearance of starting material. Then, the reaction was quenched with *sat. aq.*  $NH_4Cl$  (5.0 mL) and extracted with ethyl acetate ( $3 \times 5.0\text{ mL}$ ). The combined organic layers were dried over  $Na_2SO_4$ , then filtered and concentrated *in vacuo*. The residue was

purified on silica gel chromatography (Pentane/Ethyl acetate = 2/1) to provide **S9-9** as a waxy solid (6.7 mg, 50%).

Data of **S9-9**: waxy solid;

$[\alpha]_D^{20}$  -93.2 (c 0.04, CHCl<sub>3</sub>);

<sup>1</sup>H NMR (500 MHz, CDCl<sub>3</sub>)  $\delta$  7.72 – 7.68 (m, 4H, *TBDPS*), 7.43 – 7.34 (m, 6H, *TBDPS*), 7.29 (likd d, *J* = 8.6 Hz, 2H, *PMB*), 6.87 (d, *J* = 8.7 Hz, 2H, *PMB*), 6.40 (d, *J* = 2.6 Hz, 1H, *H*<sub>13</sub>), 5.78 (d, *J* = 2.3 Hz, 1H, *H*<sub>13</sub>), 5.75 (d, *J* = 1.8 Hz, 1H, *H*<sub>15</sub>), 5.32 (t, *J* = 1.8 Hz, 1H, *H*<sub>15</sub>), 4.58 (d, *J* = 11.2 Hz, 1H, *PMB*), 4.52 (d, *J* = 11.1 Hz, 1H, *PMB*), 4.40 – 4.36 (m, 2H, *H*<sub>6</sub> + *H*<sub>8</sub>), 4.11 (s, 1H, *H*<sub>1</sub>), 4.05 (br s, 1H, *H*<sub>7</sub>), 3.82 – 3.81 (m, 1H, *H*<sub>5</sub>), 3.80 (s, 3H, *PMB*), 2.38 (dd, *J* = 14.8, 3.4 Hz, 1H, *H*<sub>9</sub>), 1.97 (dd, *J* = 14.9, 9.2 Hz, 1H, *H*<sub>9</sub>), 1.38 (s, 3H, *H*<sub>14</sub>), 1.10 (s, 9H, *TBDPS*) ppm;

<sup>13</sup>C NMR (125 MHz, CDCl<sub>3</sub>)  $\delta$  169.9 (*C*<sub>12</sub>), 159.5 (*PMB-C*), 136.4 (*TBDPS*), 136.2 (*TBDPS*), 135.0 (*C*<sub>11</sub>), 133.0 (*TBDPS*), 132.6 (*TBDPS*), 130.3 (*TBDPS*), 130.1 (*TBDPS*), 129.8 (*PMB-CH*), 129.7 (*PMB-C*), 128.0 (*TBDPS*), 127.7 (*TBDPS*), 125.9 (*C*<sub>4</sub>), 125.2 (*C*<sub>15</sub>H<sub>2</sub>), 124.5 (*C*<sub>13</sub>H<sub>2</sub>), 114.0 (*PMB-CH*), 94.1 (*C*<sub>2</sub>), 85.9 (*C*<sub>3</sub>), 84.1 (*C*<sub>6</sub>H), 81.7 (*C*<sub>5</sub>H), 76.6 (*C*<sub>10</sub>), 73.0 (*PMB-CH*<sub>2</sub>), 71.2 (*C*<sub>1</sub>H), 70.3 (*C*<sub>8</sub>H), 55.4 (*PMB-CH*<sub>3</sub>), 47.8 (*C*<sub>7</sub>H), 42.5 (*C*<sub>9</sub>H<sub>2</sub>, br), 29.2 (*C*<sub>14</sub>H<sub>3</sub>, br), 27.2 (*TBDPS*), 19.5 (*TBDPS*) ppm; the signal of *C*<sub>9</sub>/*C*<sub>14</sub> are broad on <sup>13</sup>C NMR because of the conformational changes, the chemical shift were confirmed by HMBC;

IR (film, cm<sup>-1</sup>) 3429, 2944, 1984, 1900, 1758, 1516, 1250, 1108, 826, 706;

HRMS(ESI) [M + H]<sup>+</sup> calculated for C<sub>39</sub>H<sub>45</sub>O<sub>7</sub>Si: 653.2935, found: 653.2936;

TLC: R<sub>f</sub> = 0.25 (Pentane/Ethyl acetate = 2/1).

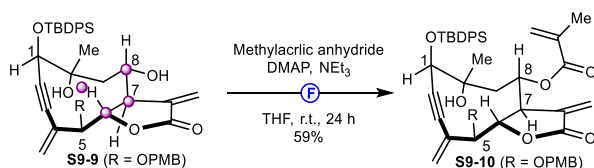

To a stirred solution of alcohol **S9-9** (2.5 mg, 0.004 mmol) in THF (1.0 mL) was added NEt<sub>3</sub> (50  $\mu$ L, 0.36 mmol) and methacrylic anhydride (25  $\mu$ L, 0.17 mmol) followed by a trace of DMAP. The reaction mixture was stirred at room temperature for 24 minutes or till the TLC analysis showed disappearance of starting material. The reaction was then quenched with *sat. aq.* NaHCO<sub>3</sub> (2.0 mL), the mixture was extracted with ethyl acetate (2  $\times$  5.0 mL), the combined organic layers were dried over Na<sub>2</sub>SO<sub>4</sub>, then filtered and concentrated *in vacuo*. The residue was purified on silica gel chromatography (Pentane/Ethyl acetate = 10/1 ~ 5/1) to provide the **S9-10** as a waxy solid (1.7 mg, 59%).

Data of **S9-10**: waxy solid;

$[\alpha]_D^{20}$  -95.8 (c 0.10, CHCl<sub>3</sub>);

<sup>1</sup>H NMR (500 MHz, CDCl<sub>3</sub>)  $\delta$  7.80 – 7.74 (m, 4H, *TBDPS*), 7.48 – 7.34 (m, 6H, *TBDPS*), 7.28 (like d, *J* = 8.7 Hz, 2H, *PMB*), 6.85 (d, *J* = 8.7 Hz, 2H, *PMB*), 6.40 (d, *J* = 3.0 Hz, 1H, *H*<sub>13</sub>), 5.99 (m, 1H, *H*<sub>3'</sub>), 5.93 (dd, *J* = 10.3, 3.9 Hz, 1H, *H*<sub>8</sub>), 5.86 (d, *J* = 2.5 Hz, 1H, *H*<sub>13</sub>), 5.83 (t, *J* = 1.9 Hz, 1H, *H*<sub>15</sub>), 5.52 (t, *J* = 1.6 Hz, 1H, *H*<sub>3'</sub>), 5.23 (t, *J* = 1.9 Hz, 1H, *H*<sub>15</sub>), 4.62 (d, *J* = 11.0 Hz, 1H, *PMB*), 4.50 (d, *J* = 11.1 Hz, 1H, *PMB*), 4.41 – 4.35 (m, 1H, *H*<sub>7</sub>), 4.21 (dd, *J* = 9.3, 5.5 Hz, 1H, *H*<sub>6</sub>), 4.09 (s, 1H, *H*<sub>1</sub>), 3.85 – 3.80 (m, 1H, *H*<sub>5</sub>), 3.79 (s, 3H, *PMB*), 2.36 (dd, *J* = 14.6, 4.0 Hz, 1H, *H*<sub>9</sub>), 2.02 – 1.98 (m, 1H, *H*<sub>9</sub>), 1.87 (t, *J* = 0.9 Hz, 3H, *H*<sub>4'</sub>), 1.36 (s, 3H, *H*<sub>14</sub>), 1.12 (s, 9H, *TBDPS*) ppm;

<sup>13</sup>C NMR (125 MHz, CDCl<sub>3</sub>)  $\delta$  169.9 (*C*<sub>12</sub>), 166.2 (*C*<sub>1'</sub>), 159.5 (*PMB-C*), 136.5 (*TBDPS*), 136.3 (*TBDPS*), 136.2 (*C*<sub>2'</sub>), 134.6 (*C*<sub>11</sub>), 132.9 (*TBDPS*), 132.5 (*TBDPS*), 130.3 (*TBDPS*), 130.0

(*TBDPS*), 129.74 (*PMB-CH*), 129.70 (*PMB-C*), 128.0 (*TBDPS*), 127.6 (*TBDPS*), 126.3 (*C<sub>3'</sub>*), 125.5 (*C<sub>4</sub>*), 124.7 (*C<sub>15</sub>H<sub>2</sub>*), 123.9 (*C<sub>13</sub>H<sub>2</sub>*), 114.0 (*PMB-CH*), 94.1 (*C<sub>2</sub>*), 86.8 (*C<sub>3</sub>*), 84.2 (*C<sub>6</sub>H*), 81.6 (*C<sub>5</sub>H*), 76.2 (*C<sub>10</sub>*), 73.6 (*PMB-CH<sub>2</sub>*), 72.3 (*C<sub>8</sub>H*), 70.8 (*C<sub>7</sub>H*), 55.4 (*PMB-CH<sub>3</sub>*), 46.2 (*C<sub>7</sub>H*), 40.6 (*C<sub>9</sub>H<sub>2</sub>*), 28.3 (*C<sub>14</sub>H<sub>3</sub>*, br), 27.1 (*TBDPS*), 19.5 (*TBDPS*), 18.4 (*C<sub>4'</sub>*) ppm;  
 IR (film, cm<sup>-1</sup>) 3444, 2923, 2178, 1936, 1108;  
 HRMS(ESI) [*M* + Na]<sup>+</sup> calculated for C<sub>43</sub>H<sub>48</sub>NaSiO<sub>8</sub>: 743.3016, found: 743.2993;  
 TLC: R<sub>f</sub> = 0.70 (Petroleum ether/Ethyl acetate = 2/1).

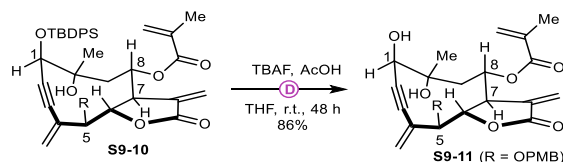

AcOH (1.4  $\mu$ L, 0.024 mmol) and TBAF (1M solution in THF, 24  $\mu$ L, 0.024 mmol) were mixed and stirred in THF (0.1 mL) at room temperature for 30 minutes and the resulting mixture was added to a stirred solution of **S9-10** (1.7 mg, 0.0024 mmol) in THF (0.5 mL). The reaction was then stirred at room temperature for further 48 hours, until the TLC analysis showed disappearance of the starting material. The reaction was diluted with ethyl acetate (25 mL) and washed with brine (5.0 mL), dried over Na<sub>2</sub>SO<sub>4</sub>, then filtered and concentrated *in vacuo*. The residue was purified on preparative TLC (Pentane/Ethyl acetate = 1/1) to provide the **S9-11** as a waxy solid (1.0 mg, 86%).

Data of lactone **S9-11**: waxy solid;

[ $\alpha$ ]<sub>D</sub><sup>20</sup> -35.4 (c 0.1, CHCl<sub>3</sub>);

<sup>1</sup>H NMR (400 MHz, CDCl<sub>3</sub>)  $\delta$  7.30 (like d, *J* = 8.7 Hz, 2H, *PMB*), 6.87 (d, *J* = 8.7 Hz, 2H, *PMB*), 6.44 (d, *J* = 2.9 Hz, 1H, *H<sub>13</sub>*), 6.00 - 5.98 (m, 2H, *H<sub>3'</sub>* + *H<sub>15</sub>*), 5.91 (d, *J* = 2.5 Hz, 1H, *H<sub>13</sub>*), 5.78 (dd, *J* = 10.7, 3.5 Hz, 1H, *H<sub>8</sub>*), 5.70 (t, *J* = 1.8 Hz, 1H, *H<sub>15</sub>*), 5.55 (p, *J* = 1.6 Hz, 1H, *H<sub>3'</sub>*), 4.68 (d, *J* = 11.1 Hz, 1H, *PMB*), 4.57 (d, *J* = 11.1 Hz, 1H, *PMB*), 4.40 (dt, *J* = 5.8, 2.8 Hz, 1H, *H<sub>7</sub>*), 4.24 (br s, 1H, *H<sub>1</sub>*), 4.19 (dd, *J* = 9.1, 5.4 Hz, 1H, *H<sub>6</sub>*), 3.97 (dt, *J* = 9.3, 1.9 Hz, 1H, *H<sub>5</sub>*), 3.80 (s, 3H, *PMB*), 2.26 - 2.20 (m, 1H, *H<sub>9</sub>*), 2.12 - 2.06 (m, 1H, *H<sub>9</sub>*), 1.85 (t, *J* = 1.6, 1.0 Hz, 3H, *H<sub>4'</sub>*), 1.46 (s, 3H, *H<sub>14</sub>*) ppm;

<sup>13</sup>C NMR (100 MHz, CDCl<sub>3</sub>)  $\delta$  169.7 (*C<sub>12</sub>*), 166.9 (*C<sub>1'</sub>*), 159.6 (*PMB-C*), 135.8 (*C<sub>2'</sub>*), 134.4 (*C<sub>11</sub>*), 129.8 (*PMB-CH*), 129.6 (*PMB-C*), 126.9 (*C<sub>3'</sub>*), 125.7 (*C<sub>4</sub>*), 125.6 (*C<sub>15</sub>H<sub>2</sub>*), 124.1 (*C<sub>13</sub>H<sub>2</sub>*), 114.0 (*PMB-CH*), 93.7 (*C<sub>2</sub>*), 86.7 (*C<sub>3</sub>*), 84.1 (*C<sub>6</sub>H*), 81.6 (*C<sub>5</sub>H*), 75.6 (*C<sub>10</sub>*), 73.8 (*PMB-CH<sub>2</sub>*), 72.6 (*C<sub>8</sub>H*), 69.6 (*C<sub>7</sub>H*), 55.4 (*PMB-CH<sub>3</sub>*), 45.9 (*C<sub>7</sub>H*), 40.3 (*C<sub>9</sub>H<sub>2</sub>*), 28.1 (*C<sub>14</sub>H<sub>3</sub>*, br), 18.2 (*C<sub>4'</sub>*) ppm;

IR (film, cm<sup>-1</sup>) 3497, 2934, 2455, 1744, 1513, 1254, 1113, 1045, 826;

HRMS(ESI) [*M* + Na]<sup>+</sup> calculated for C<sub>27</sub>H<sub>30</sub>O<sub>8</sub>Na: 505.1838, found: 505.1802;

TLC: R<sub>f</sub> = 0.25 (Pentane/Ethyl acetate = 2/1).

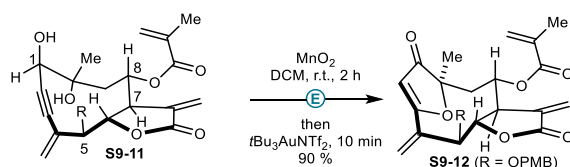

To a stirred solution of **S9-11** (1.0 mg, 0.0021 mmol) in CH<sub>2</sub>Cl<sub>2</sub> (1.0 mL) was added MnO<sub>2</sub> (2.7 mg, 0.031 mmol) and the solution was stirred at room temperature for 2 hours, or till the TLC analysis showed disappearance of the starting material. The reaction was

filtered and a trace of  $t\text{Bu}_3\text{PAuNTf}_2$  was added to the solution and stirred for 10 minutes till the the TLC analysis showed disappearance of the starting material. The resulted solution was concentrated *in vacuo*. The residue was purified on silica gel chromatography (Pentane/Ethyl acetate = 5/1) to provide **S9-12** as a white solid (0.9 mg, 90%).

Data of lactone **S9-12**: waxy solid;

$[\alpha]_D^{20} +5.05$  (c 0.04,  $\text{CHCl}_3$ );

$^1\text{H}$  NMR (400 MHz,  $\text{CDCl}_3$ )  $\delta$  7.34 (like d,  $J = 8.6$  Hz, 2H, PMB), 6.89 (like d,  $J = 8.6$  Hz, 2H, PMB), 6.27 (d,  $J = 3.4$  Hz, 1H,  $H_{13}$ ), 6.20 (dd,  $J = 2.1, 1.0$  Hz, 1H,  $H_{15}$ ), 5.99 (p,  $J = 1.2$  Hz, 1H,  $H_{3'}$ ), 5.97 (dd,  $J = 2.1, 1.0$  Hz, 1H,  $H_{15}$ ), 5.95 (s, 1H,  $H_2$ ), 5.53 (p,  $J = 1.5$  Hz, 1H,  $H_{3'}$ ), 5.52 (d,  $J = 3.0$  Hz, 1H,  $H_{13}$ ), 4.85 (d,  $J = 11.1$  Hz, 1H, PMB), 4.67 (dd,  $J = 9.4, 5.8$  Hz, 1H,  $H_6$ ), 4.59 (d,  $J = 11.1$  Hz, 1H, PMB), 4.40 – 4.35 (m, 2H,  $H_8 + H_5$ ), 3.81 (s, 3H, PMB), 3.62 (dt,  $J = 6.3, 3.0$  Hz, 1H,  $H_7$ ), 2.52 – 2.47 (m, 1H,  $H_9$ ), 2.35 (dd,  $J = 13.8, 1.8$  Hz, 1H,  $H_9$ ), 1.82 (dd,  $J = 1.6, 1.0$  Hz, 3H,  $H_4$ ), 1.52 (s, 3H,  $H_{14}$ ) ppm;

$^{13}\text{C}$  NMR (100 MHz,  $\text{CDCl}_3$ )  $\delta$  204.1 ( $C_1$ ), 185.1 ( $C_3$ ), 168.7 ( $C_{12}$ ), 166.7 ( $C_{1'}$ ), 159.6 (PMB-C), 137.4 ( $C_4$ ), 135.5 ( $C_{2'}$ ), 133.1 ( $C_{11}$ ), 129.9 (PMB-CH), 129.6 (PMB-C), 126.7 ( $C_{3'}$ ), 124.3 ( $C_{13}\text{H}_2$ ), 123.9 ( $C_{15}\text{H}_2$ ), 114.1 (PMB-CH), 106.9 ( $C_2\text{H}$ ), 90.5 ( $C_{10}$ ), 85.6 ( $C_6\text{H}$ ), 80.8 ( $C_5\text{H}$ ), 74.8 (PMB- $\text{CH}_2$ ), 70.8 ( $C_8\text{H}$ ), 55.5 (PMB- $\text{CH}_3$ ), 51.9 ( $C_7\text{H}$ ), 45.5 ( $C_9\text{H}_2$ ), 21.2 ( $C_{14}\text{H}_3$ ), 18.1 ( $C_4\text{H}_3$ ) ppm;

IR (film,  $\text{cm}^{-1}$ ) 3498, 2170, 1769, 1713, 1250, 1159, 1040, 813;

HRMS(ESI)  $[\text{M} + \text{Na}]^+$  calculated for  $\text{C}_{27}\text{H}_{28}\text{O}_8\text{Na}$ : 503.1682, found: 503.1685;

TLC: Rf = 0.5 (Pentane/Ethyl acetate = 2.5/1).

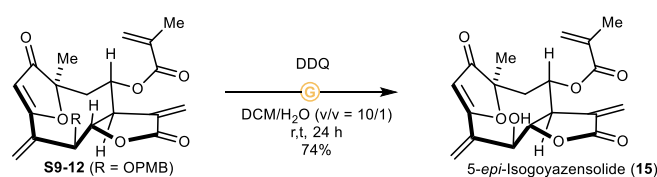

To a stirred solution of **S9-12** (0.9 mg, 0.0019 mmol) in  $\text{CH}_2\text{Cl}_2/\text{H}_2\text{O}$  (1.0 mL/ 4 drops) was added DDQ (1.3 mg, 0.0057 mmol) and the mixture was stirred at room temperature for 24 hours till the TLC analysis showed disappearance of the starting material. The reaction mixture was then quenched by saturated aqueous  $\text{NaHCO}_3$  (1.0 mL) and extracted with  $\text{CH}_2\text{Cl}_2$  ( $2 \times 10$  mL). The combined organic layers were dried over  $\text{Na}_2\text{SO}_4$ , filtered, concentrated *in vacuo* and purified on silica gel chromatography (Pentane/Ethyl acetate = 5/1 ~ 2/1) to provide **15** as a waxy solid(0.5 mg, 74%).

Data of **15**: waxy solid;

$[\alpha]_D^{20} -18$  (c 0.04,  $\text{CHCl}_3$ );

$^1\text{H}$  NMR and  $^{13}\text{C}$  NMR data, see **Table S14**;

IR (film,  $\text{cm}^{-1}$ ) 3678, 2921, 1988, 1711, 1261, 1144, 819;

HRMS(ESI)  $[\text{M} + \text{Na}]^+$  calculated for  $\text{C}_{19}\text{H}_{20}\text{NaO}_7$ : 383.1107, found: 383.1115;

TLC: Rf = 0.20 (Petroleum ether/Ethyl acetate = 3/1).



**Figure S10.** Synthesis of **20b** from **25-1**.

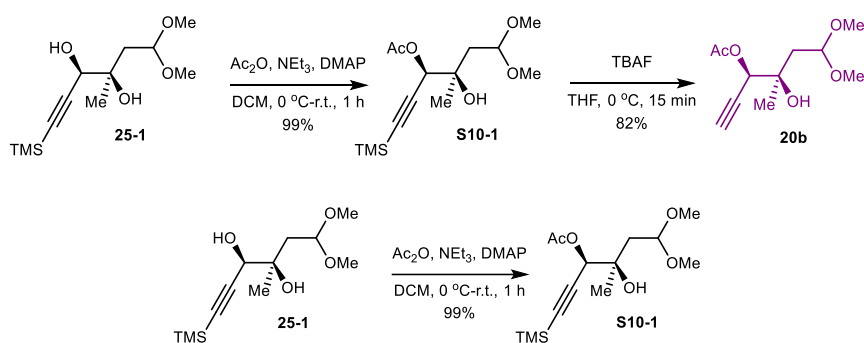

Compound **25-1** can also be obtained after SAD from **25**. To a mixture of compound **25-1** (13.4 g, 51.5 mmol), acetic anhydride (5.84 mL, 61.85 mmol) and DMAP (628 mg, 5.15 mmol) in  $\text{CH}_2\text{Cl}_2$  (200 mL) was added dropwise  $\text{Et}_3\text{N}$  (17.8 mL, 129 mmol) at  $0\text{ }^\circ\text{C}$ . then the mixture was allowed to warm to room temperature and stirred 1 hour. After the reaction was diluted with  $\text{CH}_2\text{Cl}_2$  (200 mL) and washed with  $\text{HCl}$  0.1 M (100 mL), followed by  $\text{H}_2\text{O}$  (100 mL) and Brine (100 mL). The organic layer was then dried over sodium sulfate, the solvent was removed and a pale-yellow oil was obtained **S10-1** (15.5 g, yield 99%).

Data of **S10-1**: pale-yellow oil;

$[\alpha]_D^{20}$  -34 (c 0.3,  $\text{CHCl}_3$ );

$^1\text{H}$  NMR (400 MHz,  $\text{CDCl}_3$ )  $\delta$  5.42 (s, 1H), 4.73 (dd,  $J = 6.4, 5.3$  Hz, 1H), 3.40 (d,  $J = 9.9$  Hz, 6H), 2.15 (s, 3H), 2.09 (dd,  $J = 14.6, 5.3$  Hz, 1H), 1.91 (dd,  $J = 14.6, 6.5$  Hz, 1H), 0.19 (s, 9H) ppm;

$^{13}\text{C}$  NMR (101 MHz,  $\text{CDCl}_3$ )  $\delta$  169.9, 102.3, 100.4, 92.0, 72.7, 69.7, 53.5, 53.2, 39.8, 23.0, 21.0, -0.2 ppm;

HRMS(ESI)  $[\text{M} + \text{Na}]^+$  calculated for  $\text{C}_{14}\text{H}_{26}\text{O}_5\text{Si}$ : 325.1550, found: 325.1437;

TLC:  $R_f = 0.35$  (Pentane/Ethyl acetate = 2/1).

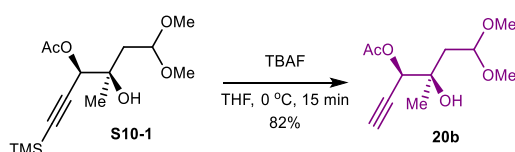

To a solution of **S10-1** (15.5 g, 51.5 mmol) in THF (170 mL) was added dropwise TBAF (51.5 mL, 1M in THF, 51.5 mmol) at  $0\text{ }^\circ\text{C}$ . The reaction mixture was then stirred for 15 minutes and quenched with saturated  $\text{NH}_4\text{Cl}$  (50 mL), then diluted with  $\text{Et}_2\text{O}$  (200 mL) and washed with  $\text{HCl}$  0.1M (100 mL)  $\text{H}_2\text{O}$  (100 mL) and Brine (100 mL). The Organic layer was extracted and dried over  $\text{Na}_2\text{SO}_4$ . The solvent was removed and the residue was purified by chromatography on silica gel (pentane/ethyl acetate 7/3) to give a pale-yellow oil **20b** (9.75 g, yield 82%).

Data of **20b**: pale-yellow oil;

$[\alpha]_D^{20}$  -19.4 (c 0.1,  $\text{CHCl}_3$ );

$^1\text{H}$  NMR (400 MHz,  $\text{CDCl}_3$ )  $\delta$  5.38 (d,  $J = 2.2$  Hz, 1H), 4.74 (t,  $J = 5.8$  Hz, 1H), 3.40 (d,  $J = 4.4$  Hz, 6H), 2.50 (d,  $J = 2.2$  Hz, 1H), 2.15 (s, 3H), 2.11 (dd,  $J = 14.6, 5.6$  Hz, 1H), 1.93 (dd,  $J = 14.6, 6.0$  Hz, 1H) ppm;

$^{13}\text{C}$  NMR (101 MHz,  $\text{CDCl}_3$ )  $\delta$  169.8, 102.2, 79.0, 74.8, 72.5, 69.3, 53.4, 53.2, 39.5, 23.2, 20.9 ppm;  
 TLC: Rf = 0.25 (Pentane/Ethyl acetate = 2/1).

**Figure S11.** Synthesis of Goyzensolide (**1**) and GOYA-1 from **38** and **20b**.

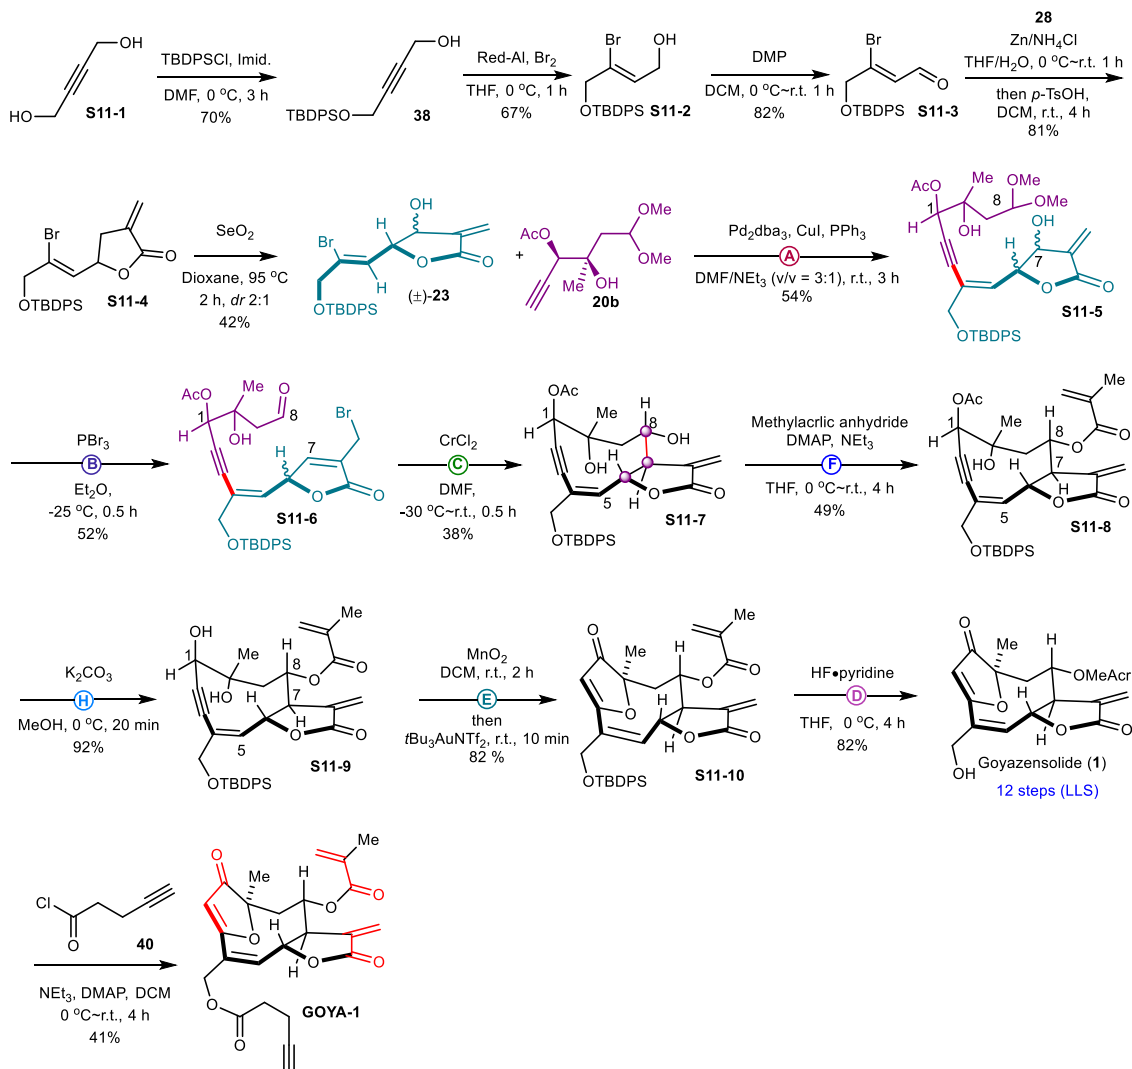

**38** was prepared from **S11-1** according to the reported procedure.<sup>26</sup>

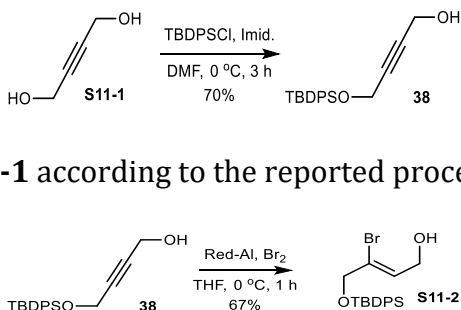

<sup>26</sup> Koura, M., Yamaguchi, Y., Kurobuchi, S., Sumida, H., Watanabe, Y., Enomoto, T., Matsuda, T., Koshizawa, T., Matsumoto, Y., Shibuya, K. *Bioorg. Med. Chem.* **2016**, *24*, 3436-3446.

To a solution of **38** (38 g, 104 mmol) in THF (400 mL), was added vitride (53 mL, 3.5 M in toluene, 185 mmol) at 0 °C. The mixture was stirred at 0 °C for 15 minutes, and then Br<sub>2</sub> (6.96 mL, 135 mmol) was added over 5 minutes. After 15 minutes, saturated aqueous Na<sub>2</sub>S<sub>2</sub>O<sub>3</sub> (100 mL) and saturated aqueous Rochelle's salt (100 mL) were added at room temperature, and the mixture was stirred for 30 minutes. The mixture was then extracted with ethyl acetate (100 mL × 3), and the combined organic layers were washed with brine (200 mL), dried over MgSO<sub>4</sub>, and concentrated to give the crude alcohol as a colorless oil (28 g, 67%).

Data of **S11-2**: colorless oil;

<sup>1</sup>H NMR (400 MHz, CDCl<sub>3</sub>) δ 7.69 (dd, *J* = 7.9, 1.5 Hz, 4H), 7.44 (ddd, *J* = 18.9, 7.6, 6.1 Hz, 6H), 6.39 (tt, *J* = 6.1, 1.6 Hz, 1H), 4.34 (d, *J* = 6.1 Hz, 2H), 4.30 (d, *J* = 1.5 Hz, 2H), 1.11 (s, 9H) ppm;

<sup>13</sup>C NMR (101 MHz, CDCl<sub>3</sub>) δ 135.5, 132.9, 129.9, 127.8, 126.8, 126.6, 68.0, 61.8, 26.7, 19.2 ppm;

TLC: R<sub>f</sub> = 0.4 (Pentane/Ethyl acetate = 3/1).

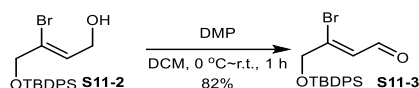

To a solution of **S11-2** (25 g, 61.7 mmol) in CH<sub>2</sub>Cl<sub>2</sub> (300 mL) was added DMP (31.3 g, 74 mmol) in portions at 0 °C. The mixture was stirred at 0 °C for 15 minutes, and mixture allowed to warm to room temperature. After 30 minutes, saturated aqueous Na<sub>2</sub>S<sub>2</sub>O<sub>3</sub> (50 mL) and saturated aqueous NaHCO<sub>3</sub> (50 mL) were added at room temperature, and the mixture was stirred for 10 more minutes. The whole was extracted with Et<sub>2</sub>O (150 mL × 3), and the combined organic layers were washed with brine (200 mL) dried over MgSO<sub>4</sub>, and concentrated to give crude aldehyde as a pale yellow oil (20.3 g, yield 82%).

Data of **S11-3**: pale yellow oil;

<sup>1</sup>H NMR (400 MHz, CDCl<sub>3</sub>) δ 10.00 (d, *J* = 6.9 Hz, 1H), 7.67 (d, *J* = 8.0 Hz, 4H), 7.47 (dd, *J* = 15.8, 6.0 Hz, 6H), 6.93 (d, *J* = 6.9 Hz, 1H), 4.43 (s, 2H), 1.11 (s, 9H) ppm;

<sup>13</sup>C NMR (101 MHz, CDCl<sub>3</sub>) δ 192.5, 147.3, 135.1, 131.8, 129.9, 127.7, 125.2, 68.1, 26.4, 18.9 ppm;

TLC: R<sub>f</sub> = 0.6 (Pentane/Ethyl acetate = 4/1).

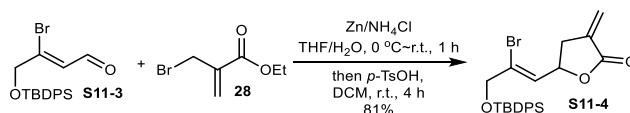

To a mixture of **S11-3** (8.5 g, 21.2 mmol), allylic bromide **28** (6.13 g, 31.8 mmol) in THF/water (6/1, 140 ml) at 0 °C under a vigorous stirring was added Zn (2.48 g, 38.2 mmol) in portions. The mixture was allowed to warm to room temperature for 1 hour. The reaction mixture was then diluted with Et<sub>2</sub>O (200 mL) and water (150 mL). The organic phase was washed with Brine (100 mL), dried over Na<sub>2</sub>SO<sub>4</sub> and volatiles were evaporated *in vacuo*. The crude was diluted in CH<sub>2</sub>Cl<sub>2</sub> (150 mL) and to the solution was added PTSA (0.86 g, 5.0 mmol). Then the mixture was stirred for 4 hours at room temperature. The reaction was then diluted with HCl (0.1M, 100 mL), the organic phase was then washed with H<sub>2</sub>O (100 mL) and Brine (100 mL), dried over Na<sub>2</sub>SO<sub>4</sub> and the

solvent was removed *in vacuo*. Chromatography on silica gel (pentane/ethyl acetate 8/2) gave a pale-yellow oil (8.1 g, yield 81%).

Data of **S11-4**: pale-yellow oil;

$^1\text{H NMR}$  (400 MHz,  $\text{CDCl}_3$ )  $\delta$  7.67 (dd,  $J = 8.7, 3.8$  Hz, 4H), 7.50–7.39 (m, 6H), 6.36 (dt,  $J = 7.6, 1.7$  Hz, 1H), 6.30 (t,  $J = 2.8$  Hz, 1H), 5.70 (t,  $J = 2.5$  Hz, 1H), 5.37 (dd,  $J = 14.6, 7.6$  Hz, 1H), 4.36–4.24 (m, 2H), 3.30 (dd,  $J = 17.1, 7.9$  Hz, 1H), 2.66 (dd,  $J = 17.1, 6.7$  Hz, 1H), 1.10 (s, 9H) ppm;

$^{13}\text{C NMR}$  (101 MHz,  $\text{CDCl}_3$ )  $\delta$  170.0, 135.4, 135.4, 133.7, 132.7, 132.5, 130.0, 130.0, 128.9, 127.9, 127.8, 126.1, 122.5, 76.0, 67.8, 33.8, 26.7, 19.2;

HRMS(ESI)  $[\text{M} + \text{H}]^+$  calculated for  $\text{C}_{24}\text{H}_{27}\text{BrO}_3\text{Si}$ : 471.0913, found 471.1007;

TLC: Rf = 0.5 (Pentane/Ethyl acetate = 4/1) ppm.

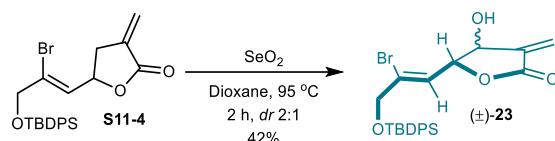

To a stirred solution of lactone **S11-4** (2.0 g, 4.2 mmol) in dioxane (20 mL) was added  $\text{SeO}_2$  (2.8 g, 25.2 mmol) in 3 portions at 95 °C within 1.5 hours. After the addition, the reaction mixture was stirred at the same temperature for another 30 minutes and then cooled down to room temperature. Then dioxane was evaporated and  $\text{Et}_2\text{O}$  (80 mL) was added, stirred for 30 minutes, filtered and the solution was washed with saturated aqueous  $\text{NaHCO}_3$  (20 mL), diluted  $\text{Na}_2\text{S}$  (10 mL) and brine (20 mL). The organic phase was dried over  $\text{Na}_2\text{SO}_4$ , then filtered and concentrated *in vacuo*. The residue was purified on silica gel chromatography (Pentane/Ethyl acetate = 10/1 ~ 1/1) to provide **23** as a light yellow oil (860 mg, 42%).

Data of **23**: light yellow oil;

Obtained as a mixture of diastereomers ( $dr = 2:1$  as determined by  $^1\text{H NMR}$ );

$^1\text{H NMR}$  (400 MHz,  $\text{CDCl}_3$ )  $\delta$  7.66 (td,  $J = 7.2, 1.5$  Hz, 4H), 7.48–7.39 (m, 6H), 6.51 (d,  $J = 1.7$  Hz, 0.33H), 6.49 (d,  $J = 2.4$  Hz, 0.66H), 6.40 (dt,  $J = 7.6, 1.7$  Hz, 0.33H), 6.26 (dt,  $J = 8.0, 1.7$  Hz, 0.66H), 6.06 (d,  $J = 1.5$  Hz, 0.33H), 6.02 (d,  $J = 2.1$  Hz, 0.66H), 5.35 (dd,  $J = 7.5, 5.6$  Hz, 0.33H), 5.14 (dd,  $J = 8.0, 4.7$  Hz, 0.66H), 5.01 (dt,  $J = 5.6, 1.6$  Hz, 0.33H), 4.63 (dt,  $J = 4.6, 2.3$  Hz, 0.66H), 4.36 (d,  $J = 5.0$  Hz, 0.66H), 4.34 (s, 1.32H), 1.10 (s, 9H) ppm;

$^{13}\text{C NMR}$  (101 MHz,  $\text{CDCl}_3$ )  $\delta$  167.9, 137.4, 135.5, 132.7, 132.4, 131.0, 130.1, 130.0, 127.9, 126.1, 123.5, 121.1, 83.4, 81.0, 73.8, 69.1, 67.9, 26.7, 26.7, 19.2 ppm;

HRMS(ESI)  $[\text{M} + \text{Na}]^+$  calculated for  $\text{C}_{24}\text{H}_{27}\text{BrO}_4\text{Si}$ : 509.0862, found 509.0772;

TLC: Rf = 0.25 (Pentane/Ethyl acetate = 4/1).

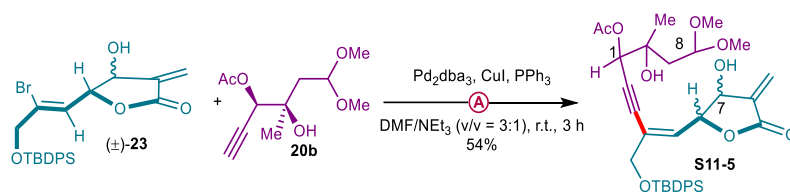

To a stirred solution of alkyne **20b** (269 mg, 1.17 mmol) and vinyl bromide **23** (860 mg, 1.76 mmol) in  $\text{DMF}/\text{Et}_3\text{N}$  (6.0 mL/2.0 mL) was added  $\text{PPh}_3$  (60 mg, 0.23 mmol) at room temperature. under  $\text{N}_2$ . Then  $\text{Pd}_2\text{dba}_3$  (109 mg, 0.12 mmol) and  $\text{CuI}$  (11 mg, 0.06 mmol)

were added to the reaction. The resulted mixture was stirred at the same temperature for 3 hours or till the TLC analysis showed disappearance of starting material. The reaction was quenched by *sat. aq.* NH<sub>4</sub>Cl (5.0 mL) and extracted with ethyl acetate (20 mL × 3). The combined organic layers were dried over Na<sub>2</sub>SO<sub>4</sub>, filtered and concentrated *in vacuo*. The residue was purified on silica gel chromatography (CH<sub>2</sub>Cl<sub>2</sub>/ethyl acetate = 1/1) to provide enyne **S11-5** as mixture of diastereomers as a yellow oil (402 mg, 54%).

Data of **S11-5**: yellow oil;

<sup>1</sup>H NMR (400 MHz, CDCl<sub>3</sub>) δ 7.66 (m, 4H), 7.42 (m, 6H), 6.47 (m, 1H), 6.22 (m, 1H), 6.01 (m, 1H), 5.51–5.33 (m, 1H), 5.30–4.97 (m, 1H), 4.77–4.55 (m, 2H), 4.23 (m, 2H), 3.45–3.24 (m, 6H), 2.18–1.98 (m, 4H), 1.96–1.79 (m, 1H), 1.33 (t, 3H), 1.08 (s, 9H) ppm;

<sup>13</sup>C NMR (101 MHz, CDCl<sub>3</sub>) δ 170.2, 168.4, 137.9, 137.6, 135.5, 133.4, 133.0, 132.8, 132.8, 132.7, 132.7, 129.9, 129.8, 128.0, 127.8, 126.3, 126.1, 126.0, 126.0, 102.3, 102.1, 102.0, 92.4, 92.4, 84.0, 83.9, 81.6, 80.1, 74.1, 74.1, 72.8, 72.7, 72.7, 70.5, 70.4, 70.2, 69.8, 65.0, 64.7, 64.7, 53.6, 53.5, 53.4, 53.3, 53.2, 53.2, 39.4, 39.4, 39.3, 26.7, 26.7, 23.9, 23.8, 23.7, 20.9, 20.9, 19.2 ppm;

HRMS(ESI) [M + Na]<sup>+</sup> calculated for C<sub>35</sub>H<sub>44</sub>O<sub>9</sub>Si: 659.2755, found 659.2652;

TLC: R<sub>f</sub> = 0.3 (DCM/Ethyl acetate = 1/1).

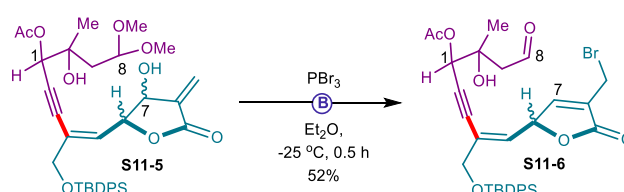

To a solution of **S11-5** (402 mg, 0.63 mmol) in Et<sub>2</sub>O (20 mL) at -25 °C, was added dropwise a solution of PBr<sub>3</sub> (1.2 mL, 1M in Et<sub>2</sub>O). After 30 minutes, the mixture was quenched with cold H<sub>2</sub>O (1 mL) and allowed to warm to room temperature. Then the reaction was extracted with CH<sub>2</sub>Cl<sub>2</sub> (50 mL), and the organic layer was dried over Na<sub>2</sub>SO<sub>4</sub> and concentrated. The residue was purified on silica gel chromatography (Pentane/Ethyl acetate = 7/3 ~ 3/7) to give a yellow solid corresponding to **S11-6** as a mixture of inseparable 1:1 diastereoisomers (213 mg, yield 52%).

Data of **S11-6**: yellow solid;

<sup>1</sup>H NMR (400 MHz, CDCl<sub>3</sub>) δ 9.85 (t, *J* = 3.8 Hz, 1H), 7.71–7.60 (m, 4H), 7.52–7.37 (m, 7H), 7.35 (d, *J* = 1.2 Hz, 1H), 5.96 – 5.81 (m, 2H), 5.48 (d, *J* = 2.6 Hz, 1H), 4.21 (d, *J* = 0.7 Hz, 2H), 4.14 (d, *J* = 0.8 Hz, 2H), 2.70 (ddd, *J* = 29.0, 15.2, 9.3 Hz, 2H), 2.13 (s, 3H), 1.41 (s, 3H), 1.07 (s, 9H) ppm;

<sup>13</sup>C NMR (101 MHz, CDCl<sub>3</sub>) δ 201.30, 201.28, 170.98, 170.95, 169.66, 169.64, 150.55, 135.68, 135.66, 135.63, 135.61, 132.85, 132.74, 131.53, 131.51, 130.18, 129.33, 129.32, 128.04, 127.88, 92.58, 92.52, 81.81, 81.79, 79.31, 79.28, 77.41, 77.16, 76.91, 73.45, 70.19, 70.17, 65.17, 50.65, 50.60, 26.91, 24.18, 24.16, 20.98, 20.96, 19.38 ppm;

HRMS(ESI) [M + Na]<sup>+</sup> calculated for C<sub>33</sub>H<sub>37</sub>BrO<sub>7</sub>Si: 675.1492, found 675.1390;

TLC: R<sub>f</sub> = 0.25 (Pentane/Ethyl acetate = 2/1).

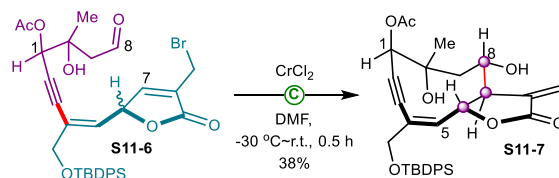

A 10 mL round bottom flask equipped with a magnetic stir bar was charged with bromolactone **S11-6** (213 mg, 0.33 mmol) and DMF (10 mL). The reaction mixture was cooled down to -30 °C and CrCl<sub>2</sub> (405 mg, 3.3 mmol) was added. The temperature was allowed to rise to room temperature and stirred for 30 minutes till the TLC analysis showed disappearance of the starting material. Then the reaction was quenched with *sat. aq.* NH<sub>4</sub>Cl (50 mL) and extracted with ethyl acetate (3 × 25 mL). The combined organic layers were dried over Na<sub>2</sub>SO<sub>4</sub>, then filtered and concentrated *in vacuo*. The residue was purified on silica gel chromatography (CH<sub>2</sub>Cl<sub>2</sub>/Ethyl acetate = 1/1) to provide **S11-7** as a yellow solid (72 mg, 38%).

Data of **S11-7**: yellow solid;

$[\alpha]_D^{20}$  -108 (c 0.25, CHCl<sub>3</sub>);

<sup>1</sup>H NMR (500 MHz, CDCl<sub>3</sub>) δ 7.64 (dd, *J* = 6.5, 5.0 Hz, 4H), 7.48–7.36 (m, 6H), 6.46 (s, 1H), 6.41 (s, 1H), 5.81 (s, 1H), 5.20 (s, 1H), 5.16 (s, 1H), 4.15 (s, 2H), 4.10 (s, 1H), 3.98 (s, 1H), 2.63 (d, *J* = 14.0 Hz, 1H), 2.16–2.09 (m, 4H), 1.42 (s, 3H), 1.07 (s, 9H) ppm;

<sup>13</sup>C NMR (126 MHz, CDCl<sub>3</sub>) δ 169.7, 169.3, 139.2, 135.5, 135.5, 132.8, 132.8, 129.9, 129.9, 127.8, 125.7, 70.8, 70.4, 63.9, 29.7, 26.8, 20.8, 19.2 ppm;

HRMS(ESI) [M + Na]<sup>+</sup> calculated for C<sub>33</sub>H<sub>38</sub>O<sub>7</sub>Si: 597.2387, found 597.2284;

TLC: R<sub>f</sub> = 0.35 (DCM/Ethyl acetate = 1/1).

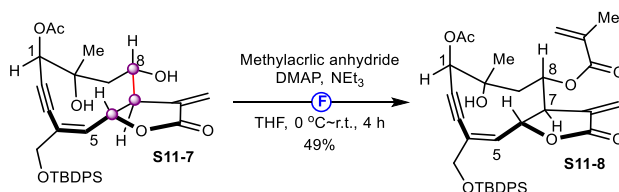

To a solution of **S11-7** (50 mg, 0.087 mmol), methacrylic anhydride (20 μL, 0.13 mmol) and DMAP (1.0 mg, 9.0 μmol) in CH<sub>2</sub>Cl<sub>2</sub> (1.0 mL) at 0 °C, was added dropwise a solution of Et<sub>3</sub>N (30 μL, 0.22 mmol) in CH<sub>2</sub>Cl<sub>2</sub> (0.5 mL). Mixture allowed to warm at room temperature and after 4 hours, HCl 0.1M (1.0 mL) was added. The whole was extracted with CH<sub>2</sub>Cl<sub>2</sub> (2.0 mL × 2), and the combined organic layers were washed with brine (1.0 mL), dried over MgSO<sub>4</sub>, and purified by silica gel chromatography (pentane/ethyl acetate = 6/4) to give a yellow oil (27.5 mg, yield 49%).

Data of **S11-8**: yellow oil;

$[\alpha]_D^{20}$  -61 (c 0.15, CHCl<sub>3</sub>);

<sup>1</sup>H NMR (400 MHz, CDCl<sub>3</sub>) δ 7.67–7.64 (m, 4H), 7.45–7.38 (m, 6H), 6.50 (d, *J* = 2.4 Hz, 1H), 6.43 (d, *J* = 2.8 Hz, 1H), 6.04 (s, 1H), 5.86 (s, 1H), 5.84 (d, *J* = 2.3 Hz, 1H), 5.59 (s, 1H), 5.02 (dd, *J* = 5.1, 2.6 Hz, 1H), 4.53 (dd, *J* = 5.1, 2.5 Hz, 1H), 4.20–4.12 (m, 2H), 2.39 (dd, *J* = 14.8, 3.6 Hz, 1H), 2.20 (t, *J* = 8.3 Hz, 4H), 1.91 (s, 3H), 1.39 (s, 3H), 1.09 (s, 9H) ppm;

<sup>13</sup>C NMR (101 MHz, CDCl<sub>3</sub>) δ 169.7, 166.2, 138.5, 135.8, 135.5, 134.8, 132.8, 129.9, 127.8, 126.4, 124.0, 122.7, 95.9, 80.4, 74.7, 72.6, 69.4, 64.2, 46.2, 29.6, 26.8, 20.8, 19.2, 18.2 ppm;

Traces of DCM (integration = 0.9), water (integration = 9.51) and grease (integration = 4.28), purity of the compound is 80.7%.

HRMS(ESI)  $[M + H]^+$  calculated for  $C_{37}H_{42}O_8Si$ : 643.2649, found 643.2888;  
 TLC: Rf = 0.25 (Pentane/Ethyl acetate = 2/1).

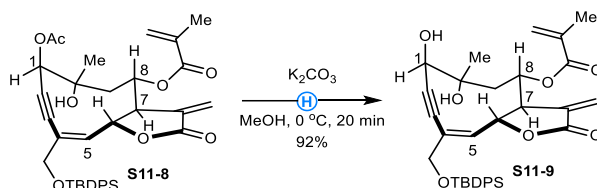

To a solution of **S11-8** (27.5 mg, 0.043 mmol) in MeOH (2.0 mL) at 0 °C, was added dropwise a solution of  $K_2CO_3$  (27  $\mu$ L, 1M in  $H_2O$ ). The mixture was stirred 20 minutes at 0 °C and quenched with a cold mixture of  $CH_2Cl_2/H_2O$  (10mL). The reaction was then extracted with  $CH_2Cl_2$  (5.0 mL), and the combined organic layers were washed with brine (5.0 mL), dried over  $MgSO_4$ , concentrated and purified by PTLC (pentane/ethyl acetate = 1/1) to give propargyl alcohol **S11-9** as a yellow oil (24 mg, yield 92%).

Data of **S11-9**: yellow oil;

$[\alpha]_D^{20}$  -48 (c 0.12,  $CHCl_3$ );

$^1H$  NMR (400 MHz,  $CDCl_3$ )  $\delta$  7.66 (dd,  $J = 7.9, 1.5$  Hz, 4H), 7.47–7.37 (m, 6H), 6.46 (dd,  $J = 6.5, 2.6$  Hz, 2H), 6.06 (s, 1H), 5.92 (d,  $J = 9.4$  Hz, 1H), 5.86 (d,  $J = 2.5$  Hz, 1H), 5.63–5.58 (m, 1H), 4.95 (dd,  $J = 5.6, 2.6$  Hz, 1H), 4.43 (td,  $J = 4.6, 2.5$  Hz, 1H), 4.26 (s, 1H), 4.23–4.16 (m, 2H), 4.14 (d,  $J = 7.1$  Hz, 1H), 2.29 (dd,  $J = 15.0, 3.3$  Hz, 1H), 2.19–2.10 (m, 1H), 1.90 (s, 3H), 1.45 (s, 3H), 1.09 (s, 9H) ppm;

$^{13}C$  NMR (101 MHz,  $CDCl_3$ )  $\delta$  169.4, 166.9, 137.7, 135.6, 135.5, 134.6, 132.8, 129.9, 127.8, 126.9, 123.8, 122.6, 98.7, 84.5, 80.3, 75.7, 72.5, 69.6, 64.4, 60.4, 53.4, 46.0, 39.8, 29.0, 26.8, 21.0, 19.2, 18.0, 14.2 ppm;

HRMS(ESI)  $[M + H]^+$  calculated for  $C_{35}H_{40}O_7Si$ : 601.2543, found 601.2622;

TLC: Rf = 0.25 (Pentane/Ethyl acetate = 2/1).

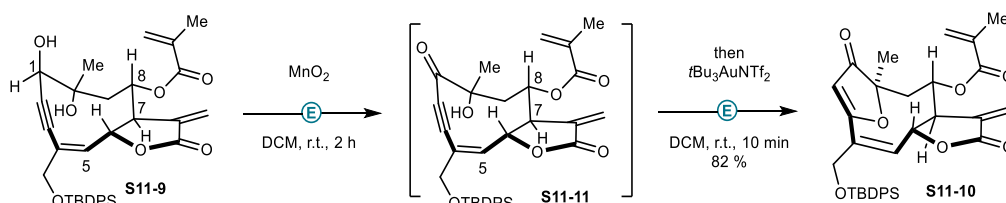

To a stirred solution of **S11-9** (24 mg, 40  $\mu$ mol) in  $CH_2Cl_2$  (5.0 mL) was added  $MnO_2$  (35 mg, 0.4 mmol) and the solution was stirred at room temperature for 2 hours, till the TLC analysis showed disappearance of the starting material. The reaction was filtered and a trace of  $tBu_3PAuNTf_2$  was added and the solution was stirred for 10 more minutes till the TLC analysis showed disappearance of the starting material. The resulted solution was concentrated *in vacuo* and the residue was purified on silica gel chromatography (Pentane/Ethyl acetate = 3/1) to provide the **S11-10** as a white solid (19 mg, 82%).

Data of **S11-11**: white solid;

$[\alpha]_D^{20}$  -36 (c 0.12,  $CHCl_3$ );

$^1H$  NMR (400 MHz,  $CDCl_3$ )  $\delta$  7.70–7.62 (m, 4H), 7.51–7.39 (m, 6H), 6.80 (q,  $J = 2.0$  Hz, 1H), 6.49 (d,  $J = 3.3$  Hz, 1H), 6.09 (s, 1H), 5.84 (t,  $J = 4.5$  Hz, 1H), 5.81 (d,  $J = 2.9$  Hz, 1H), 5.66–5.59 (m, 1H), 5.28 (dq,  $J = 7.3, 2.5$  Hz, 1H), 4.32–4.25 (m, 2H), 4.01 (dt,  $J = 6.0, 2.8$  Hz, 1H),

2.51 (dd,  $J = 15.5, 5.7$  Hz, 1H), 2.36 (dt,  $J = 6.4, 2.9$  Hz, 1H), 1.92 (s, 3H), 1.47 (s, 3H), 1.10 (d,  $J = 6.4$  Hz, 9H) ppm;  
 $^{13}\text{C}$  NMR (101 MHz,  $\text{CDCl}_3$ )  $\delta$  190.0, 169.0, 167.0, 143.8, 136.1, 135.9, 133.5, 133.0, 130.7, 128.5, 127.7, 125.1, 121.4, 96.0, 94.4, 80.3, 80.2, 71.2, 64.8, 50.9, 44.4, 27.3, 25.6, 19.8, 18.7 ppm;  
 HRMS(ESI)  $[\text{M} + \text{H}]^+$  calculated for  $\text{C}_{35}\text{H}_{38}\text{O}_7\text{Si}$ : 599.2387, found 599.2465;  
 TLC:  $R_f = 0.3$  (Pentane/Ethyl acetate = 2/1).

Data of **S11-10**: white solid;

$[\alpha]_D^{20} -2$  (c 0.1,  $\text{CHCl}_3$ );

$^1\text{H}$  NMR (400 MHz,  $\text{CDCl}_3$ )  $\delta$  7.69–7.65 (m, 4H), 7.50–7.38 (m, 6H), 6.26 (d,  $J = 3.2$  Hz, 1H), 6.14 (d,  $J = 2.9$  Hz, 1H), 6.03 (s, 1H), 5.68 (s, 1H), 5.58–5.54 (m, 1H), 5.48 (d,  $J = 2.7$  Hz, 1H), 5.30 (td,  $J = 5.0, 2.3$  Hz, 1H), 4.53 (d,  $J = 11.8$  Hz, 1H), 4.40 (dd,  $J = 34.3, 13.9$  Hz, 2H), 3.77–3.72 (m, 1H), 2.49 (dd,  $J = 13.8, 11.8$  Hz, 1H), 2.32 (d,  $J = 11.9$  Hz, 1H), 1.85 (s, 3H), 1.51 (s, 3H), 1.09 (s, 9H) ppm;

$^{13}\text{C}$  NMR (101 MHz,  $\text{CDCl}_3$ )  $\delta$  204.6, 184.7, 168.7, 166.7, 135.6, 135.5, 135.4, 134.3, 133.9, 133.3, 132.6, 130.1, 127.8, 127.8, 126.4, 124.3, 106.4, 89.6, 81.5, 73.1, 64.1, 50.8, 43.9, 29.6, 26.7, 20.6, 19.2, 17.9 ppm;

HRMS(ESI)  $[\text{M} + \text{H}]^+$  calculated for  $\text{C}_{35}\text{H}_{38}\text{O}_7\text{Si}$ : 599.2387, found 599.2450;

TLC:  $R_f = 0.25$  (Pentane/Ethyl acetate = 2/1).

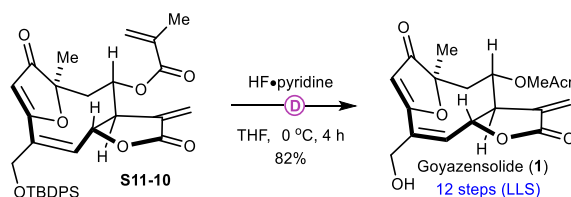

To a solution of **S11-10** (17 mg, 0.029 mmol) in THF (2.0 mL) at 0 °C, was added dropwise a solution of HF·pyridine 70% (85  $\mu\text{L}$ ) in THF (1.0 mL). The mixture was stirred 4 hours at 0 °C and quenched with saturated  $\text{NaHCO}_3$  (2.0 mL). The quenched mixture was then extracted with  $\text{Et}_2\text{O}$  (5.0 mL  $\times$  2), and the combined organic layers were washed with brine (5.0 mL), dried over  $\text{MgSO}_4$ , and purified by PTLC (Pentane/Ethyl acetate = 2/8) to give (-)-Goyazensolide (8.5 mg, yield 82%).

Data of **1**: waxy solid;

$[\alpha]_D^{20} -19$  (c 0.1,  $\text{CHCl}_3$ );

$^1\text{H}$  NMR (500 MHz,  $\text{CDCl}_3$ )  $\delta$  6.30 (dt,  $J = 3.0, 1.5$  Hz, 1H), 6.25 (d,  $J = 3.1$  Hz, 1H), 6.03 (s, 1H), 5.82 (s, 1H), 5.59–5.54 (m, 1H), 5.49 (d,  $J = 2.7$  Hz, 1H), 5.36 (dd,  $J = 4.9, 2.7$  Hz, 1H), 4.57 (dt,  $J = 11.7, 2.2$  Hz, 1H), 4.42 (dt,  $J = 3.1, 1.7$  Hz, 2H), 3.82 (t,  $J = 5.3$  Hz, 1H), 2.56–2.48 (m, 1H), 1.85 (s, 3H), 1.56 (s, 3H) ppm;

$^{13}\text{C}$  NMR (126 MHz,  $\text{CDCl}_3$ )  $\delta$  204.6, 184.2, 166.8, 135.5, 135.3, 134.2, 133.1, 126.6, 124.6, 106.6, 89.8, 81.5, 73.2, 63.2, 50.9, 43.9, 20.7, 18.0 ppm;

HRMS (ESI)  $[\text{M} + \text{H}]^+$  calculated for  $\text{C}_{19}\text{H}_{20}\text{O}_7$ : 361.1209, found 361.1392;

TLC:  $R_f = 0.2$  (DCM/Ethyl acetate = 1/2).



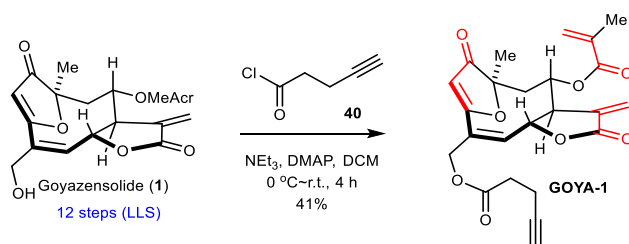

To a solution of **1** (5.0 mg, 14  $\mu$ mol), pent-4-ynoic acid chloride (2.4 mg, 21  $\mu$ mol) and DMAP (0.17 mg, 0.0014 mmol) in  $\text{CH}_2\text{Cl}_2$  (0.3 mL) at 0 °C, was added dropwise a solution of  $\text{Et}_3\text{N}$  (6.0  $\mu$ L, 42  $\mu$ mol) in  $\text{CH}_2\text{Cl}_2$  (0.1 mL). The mixture was allowed to warm to room temperature and after 4 hours, HCl (0.1M, 0.2 mL) was added. The solution was then extracted with  $\text{CH}_2\text{Cl}_2$  (1.0 mL  $\times$  2), and the combined organic layers were washed with brine (1.0 mL), dried over  $\text{MgSO}_4$ , and purified by PTLC (Pentane/Ethyl acetate = 1/1) to give a white solid (2.5 mg, yield 41%).

Data of **GOYA-1**: white solid;

$[\alpha]_D^{20}$  -13 (c 0.1,  $\text{CHCl}_3$ );

$^1\text{H}$  NMR (400 MHz,  $\text{CDCl}_3$ )  $\delta$  6.39–6.34 (m, 1H), 6.26 (d,  $J$  = 3.1 Hz, 1H), 6.03 (s, 1H), 5.83 (s, 1H), 5.57 (s, 1H), 5.49 (d,  $J$  = 2.7 Hz, 1H), 5.35 (d,  $J$  = 1.9 Hz, 1H), 4.86 (s, 2H), 4.60 – 4.51 (m, 1H), 3.80 (d,  $J$  = 2.5 Hz, 1H), 2.63 (t,  $J$  = 6.8 Hz, 2H), 2.59–2.49 (m, 3H), 2.34 (dd,  $J$  = 13.9, 1.9 Hz, 1H), 2.02 (t,  $J$  = 2.6 Hz, 1H), 1.85 (s, 3H), 1.57 (d,  $J$  = 7.8 Hz, 3H) ppm;

$^{13}\text{C}$  NMR (101 MHz,  $\text{CDCl}_3$ )  $\delta$  204.4, 183.0, 170.9, 168.4, 166.8, 138.7, 135.3, 132.9, 129.5, 126.6, 124.7, 106.8, 89.8, 82.0, 81.2, 73.2, 69.5, 63.6, 50.8, 43.9, 33.1, 20.6, 17.9, 14.3 ppm;

HRMS(ESI)  $[M + H]^+$  calculated for  $\text{C}_{24}\text{H}_{24}\text{O}_8$ : 441.1471, found 441.1394;

TLC: Rf = 0.2 (Pentane/Ethyl acetate = 1/1).

**Figure S12.** Synthesis of **GOYA-2**.

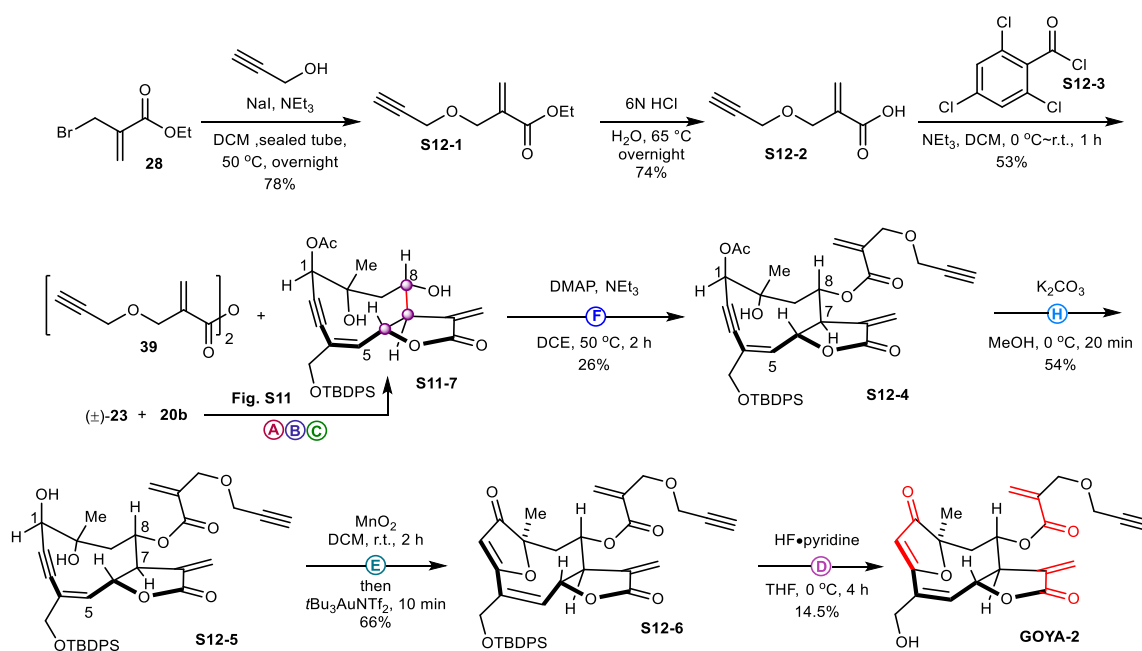

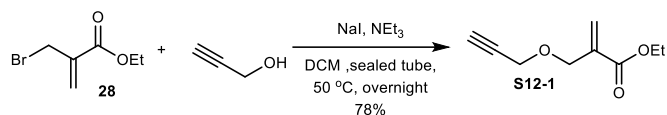

A sealed solution of propargyl alcohol (1.2 g, 21.4 mmol), ethyl 2-(bromomethyl) acrylate **28** (5.8 g, 30 mmol), NaI (320 mg, 2.1 mmol) and Et<sub>3</sub>N (12 mL, 85.6 mmol) in CH<sub>2</sub>Cl<sub>2</sub> (80 mL) was heated overnight at 50 °C. The mixture was then diluted with CH<sub>2</sub>Cl<sub>2</sub> (50 mL) and HCl (0.1M, 100 mL). The aqueous phase was extracted with CH<sub>2</sub>Cl<sub>2</sub> (100 mL), and the combined organic layers were washed with brine (200 mL), dried over MgSO<sub>4</sub>, concentrated and purified by silica gel chromatography (Pentane/Ethyl acetate = 8/2) to give a pale yellow oil (2.8 g, yield 78%).

Data of **S12-1**: pale yellow oil;

<sup>1</sup>H NMR (400 MHz, CDCl<sub>3</sub>) δ 6.34 (s, 1H), 5.89 (s, 1H), 4.30 (s, 2H), 4.27 – 4.20 (m, 4H), 2.46 (t, *J* = 2.4 Hz, 1H), 1.31 (d, *J* = 7.1 Hz, 3H) ppm;

<sup>13</sup>C NMR (101 MHz, CDCl<sub>3</sub>) δ 165.7, 136.7, 126.2, 79.3, 74.7, 67.9, 60.7, 57.8, 14.1 ppm;

TLC: R<sub>f</sub> = 0.4 (Pentane/Ethyl acetate = 4/1).

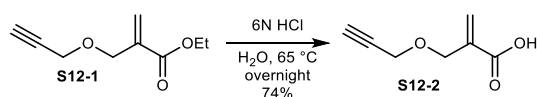

A solution of **S12-1** (500 mg, 2.98 mmol) in 6N HCl (5.0 mL) was heated at 65 °C overnight. The mixture was then diluted with H<sub>2</sub>O (20 mL) and CH<sub>2</sub>Cl<sub>2</sub> (20 mL). The solution was then extracted with CH<sub>2</sub>Cl<sub>2</sub> (10 mL × 2), and the combined organic layers were washed with brine (10 mL), dried over MgSO<sub>4</sub>, and concentrated to give crude acid **S12-2** as a brownish solid (308 mg, yield 74%).

Data of **S12-2**: brownish solid;

<sup>1</sup>H NMR (400 MHz, CDCl<sub>3</sub>) δ 6.49 (s, 1H), 6.04 (s, 1H), 4.31 (s, 2H), 4.24 (s, 2H), 2.48 (s, 1H) ppm;

<sup>13</sup>C NMR (101 MHz, CDCl<sub>3</sub>) δ 170.9, 135.9, 129.0, 79.2, 74.9, 67.4, 57.9 ppm;

TLC: R<sub>f</sub> = 0.3 (Pentane/Ethyl acetate/AcOH = 1/1/0.01).

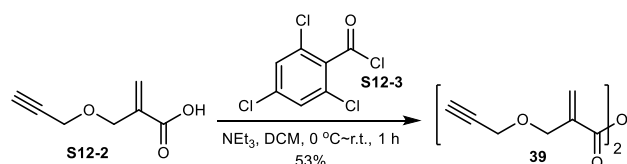

To a solution of **S12-2** (308 mg, 2.2 mmol) and Et<sub>3</sub>N (608 μL, 4.4 mmol) in CH<sub>2</sub>Cl<sub>2</sub> (6.0 mL) at 0 °C, was added dropwise a solution of acyl chloride **S12-3** (644 mg, 2.64 mmol) in CH<sub>2</sub>Cl<sub>2</sub> (2.0 mL). The mixture was then allowed to warm to room temperature and after 30 minutes, HCl (0.1M, 5.0 mL) was added. The solution was then extracted with CH<sub>2</sub>Cl<sub>2</sub> (5.0 mL × 2) and the combined organic layers were washed with brine (5.0 mL), dried

over MgSO<sub>4</sub>, and purified by Isolera Biotage using SNAP Cartridge KP-C18-HS 12 g column (Water/acetonitrile 9/1 to 1/1) to give a yellow oil (153 mg, yield 53%).

Data of **39**: yellow oil, compound unstable on silica gel;

<sup>1</sup>H NMR (400 MHz, CDCl<sub>3</sub>) δ 6.50 (s, 1H), 6.19 (s, 1H), 4.35 (s, 2H), 4.26 (s, 2H), 2.48 (s, 1H) ppm;

<sup>13</sup>C NMR (101 MHz, CDCl<sub>3</sub>) δ 161.0, 136.0, 130.3, 75.1, 67.2, 65.8, 58.0 ppm;

HRMS(ESI) [M + Na]<sup>+</sup> calculated for C<sub>14</sub>H<sub>14</sub>O<sub>5</sub>: 285.0841, found 285.0836.

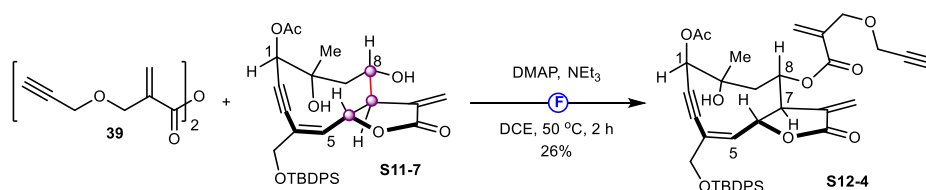

To a solution of **S11-7** (50 mg, 0.087 mmol), **39** (103 mg, 0.39 mmol) in DCE (1.0 mL) at 50 °C, was added dropwise a solution of DMAP (46 mg, 0.38 mmol) in CH<sub>2</sub>Cl<sub>2</sub> (0.3 mL). The mixture was stirred 2 hours and then allowed to cool at room temperature. HCl (0.1M, 1.0 mL) was added and the mixture was extracted with CH<sub>2</sub>Cl<sub>2</sub> (5.0 mL × 2), the combined organic layers were washed with brine (5.0 mL), dried over MgSO<sub>4</sub>, the solvent was evaporated *in vacuo* and the resulting residue was purified by silica gel chromatography (Pentane/Ethyl acetate = 7/3) to give **S12-4** as a yellow oil (16 mg, yield 26%).

Data of **S12-4**: yellow oil;

[α]<sub>D</sub><sup>20</sup> -57 (c 0.1, CHCl<sub>3</sub>);

<sup>1</sup>H NMR (400 MHz, CDCl<sub>3</sub>) δ 7.66–7.62 (m, 4H), 7.46–7.38 (m, 6H), 6.47 (dd, *J* = 3.3, 2.0 Hz, 2H), 6.42 (d, *J* = 2.3 Hz, 1H), 6.04 (d, *J* = 1.4 Hz, 1H), 5.90 (d, *J* = 1.2 Hz, 1H), 5.64 (s, 1H), 5.19 (s, 1H), 5.09 (s, 1H), 4.49 (d, *J* = 2.1 Hz, 1H), 4.36–4.30 (m, 2H), 4.25 (d, *J* = 2.4 Hz, 2H), 4.21 (dd, *J* = 5.0, 2.4 Hz, 2H), 2.49 (m, *J* = 3.5 Hz, 2H), 2.17 (m, 4H), 1.36 (s, 3H), 1.08 (s, 9H) ppm;

<sup>13</sup>C NMR (101 MHz, CDCl<sub>3</sub>) δ 169.5, 168.4, 164.3, 138.7, 135.9, 135.5, 134.8, 132.8, 129.9, 128.8, 127.8, 127.7, 79.1, 78.9, 75.2, 74.9, 74.7, 72.8, 69.8, 68.2, 67.6, 64.0, 57.9, 57.7, 30.0, 29.7, 20.8, 19.2 ppm;

HRMS(ESI) [M + Na]<sup>+</sup> calculated for C<sub>40</sub>H<sub>44</sub>O<sub>9</sub>Si: 719.2755, found 719.2653;

TLC: R<sub>f</sub> = 0.3 (Pentane/Ethyl acetate = 2/1).

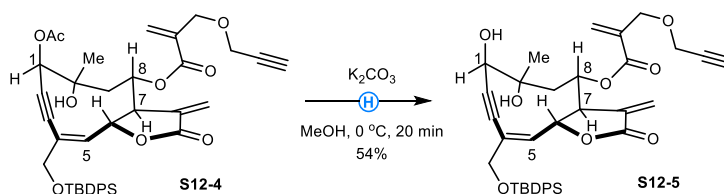

To a solution of **S12-4** (8.0 mg, 11 μmol) in MeOH (1.0 mL) at 0 °C, was added dropwise a solution of K<sub>2</sub>CO<sub>3</sub> (0.6 μL, 1M in H<sub>2</sub>O). The reaction was stirred for 20 minutes at 0 °C

and quenched with a cold mixture of CH<sub>2</sub>Cl<sub>2</sub>/H<sub>2</sub>O (1 mL/1mL). The solution was then extracted with CH<sub>2</sub>Cl<sub>2</sub> (2.0 mL) and the combined organic layers were washed with brine (1.0 mL) dried over MgSO<sub>4</sub>, concentrated and purified by PTLC (Pentane/Ethyl acetate = 1/1) to give propargyl alcohol **S12-5** as a pale-yellow oil (4.1 mg, yield 54%).

Data of **S12-5**: pale-yellow oil;

$[\alpha]_D^{20}$  -51 (c 0.2, CHCl<sub>3</sub>);

<sup>1</sup>H NMR (500 MHz, CDCl<sub>3</sub>) δ 7.66 (dd, *J* = 6.6, 1.3 Hz, 4H), 7.48–7.39 (m, 6H), 6.43 (d, *J* = 2.5 Hz, 2H), 6.33 (s, 1H), 5.92 (d, *J* = 1.1 Hz, 1H), 5.84 (d, *J* = 2.1 Hz, 1H), 5.77 (s, 1H), 5.02 (d, *J* = 2.1 Hz, 1H), 4.42 (s, 1H), 4.28 (s, 1H), 4.24 (s, 1H), 4.22–4.20 (m, 2H), 4.19 (d, *J* = 1.8 Hz, 1H), 4.17 (d, *J* = 2.3 Hz, 1H), 4.14 (d, *J* = 7.1 Hz, 1H), 2.49 (t, *J* = 2.3 Hz, 1H), 2.40 (d, *J* = 13.1 Hz, 1H), 2.15 (dd, *J* = 14.5, 10.5 Hz, 1H), 1.43 (s, 3H), 1.08 (s, 9H) ppm;

<sup>13</sup>C NMR (126 MHz, CDCl<sub>3</sub>) δ 171.1, 170.9, 169.4, 165.0, 137.9, 135.8, 135.5, 134.7, 132.8, 129.9, 129.3, 127.8, 124.4, 123.1, 79.8, 78.9, 75.7, 75.2, 72.7, 69.8, 68.0, 64.3, 60.4, 57.77, 53.4, 46.4, 31.9, 29.7, 29.3, 26.8, 22.7, 21.0, 19.2, 14.2, 14.2, 14.1 ppm;

HRMS(ESI) [M + Na]<sup>+</sup> calculated for C<sub>38</sub>H<sub>42</sub>O<sub>8</sub>Si: 677.2649, found 677.2546;

TLC: R<sub>f</sub> = 0.3 (Pentane/Ethyl acetate = 1/1).

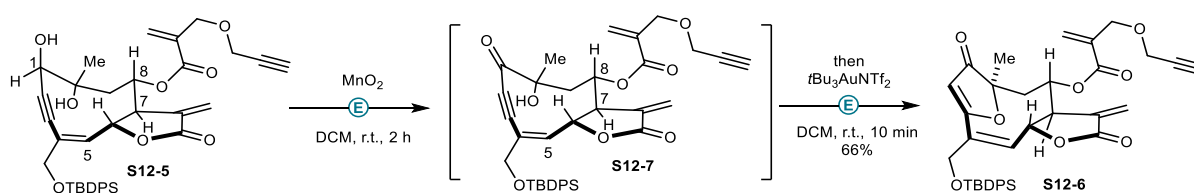

To a stirred solution of **S12-5** (4.1 mg, 6.26 μmol) in CH<sub>2</sub>Cl<sub>2</sub> (1.0 mL) was added MnO<sub>2</sub> (5.0 mg, 63 μmol) and the solution was stirred at room temperature for 2 hours, till the TLC analysis showed disappearance of the starting material. The reaction was filtered and a trace of *t*Bu<sub>3</sub>PAuNTf<sub>2</sub> was added to the CH<sub>2</sub>Cl<sub>2</sub> solution and the mixture stirred for 10 more minutes till the TLC analysis showed disappearance of the starting material. The resulted reaction was then concentrated *in vacuo*, and the residue obtained was purified on a PTLC (Pentane/Ethyl acetate = 3/1) to provide **S12-6** as a white solid (2.7 mg, 66%).

Data of **S12-7**: white solid;

$[\alpha]_D^{20}$  -56 (c 0.1, CHCl<sub>3</sub>);

<sup>1</sup>H NMR (500 MHz, CDCl<sub>3</sub>) δ 7.66 (ddd, *J* = 8.0, 2.5, 1.4 Hz, 4H), 7.50–7.39 (m, 6H), 6.78 (d, *J* = 2.3 Hz, 1H), 6.49 (d, *J* = 3.2 Hz, 1H), 6.32 (d, *J* = 0.9 Hz, 1H), 5.96 (d, *J* = 1.3 Hz, 1H), 5.82 (d, *J* = 2.8 Hz, 2H), 5.27 (dd, *J* = 6.6, 2.6 Hz, 1H), 4.28 (dd, *J* = 4.0, 2.1 Hz, 2H), 4.24 (d, *J* = 1.0 Hz, 2H), 4.23–4.19 (m, 2H), 4.03 (d, *J* = 5.1 Hz, 1H), 2.50 (dt, *J* = 4.7, 4.1 Hz, 2H), 2.42 – 2.37 (m, 1H), 1.47 (s, 3H), 1.10 (s, 9H) ppm;

<sup>13</sup>C NMR (126 MHz, CDCl<sub>3</sub>) δ 189.2, 168.3, 164.8, 143.2, 135.8, 135.5, 132.9, 132.4, 130.1, 128.7, 127.9, 124.7, 120.9, 95.3, 94.0, 79.0, 75.1, 70.9, 67.7, 64.1, 60.4, 57.8, 53.4, 50.1, 31.9, 29.7, 26.8, 25.2, 22.7, 21.0, 19.2, 14.1 ppm;

HRMS(ESI) [M + Na]<sup>+</sup> calculated for C<sub>38</sub>H<sub>44</sub>O<sub>8</sub>Si: 675.2492, found 675.2390;

TLC: R<sub>f</sub> = 0.35 (Pentane/Ethyl acetate = 2/1).

Data of **S12-6**: white solid;

$[\alpha]_D^{20}$  -11 (c 0.1, CHCl<sub>3</sub>);

<sup>1</sup>H NMR (500 MHz, CDCl<sub>3</sub>) δ 7.68–7.65 (m, 4H), 7.44–7.39 (m, 6H), 6.26 (dd, *J* = 3.7, 2.2 Hz, 2H), 6.15–6.12 (m, 1H), 5.91 (d, *J* = 1.3 Hz, 1H), 5.68 (s, 1H), 5.50 (d, *J* = 2.7 Hz, 1H), 5.28 (d, *J* = 2.3 Hz, 1H), 4.56 (d, *J* = 11.9 Hz, 1H), 4.46–4.33 (m, 2H), 4.18 (d, *J* = 2.6 Hz, 2H), 4.14 (d, *J* = 7.2 Hz, 2H), 3.75 (d, *J* = 2.6 Hz, 1H), 2.54–2.46 (m, 2H), 2.36–2.31 (m, 1H), 1.52 (s, 3H), 1.09 (s, 9H) ppm;

<sup>13</sup>C NMR (126 MHz, CDCl<sub>3</sub>) δ 204.5, 168.6, 135.7, 135.6, 135.5, 134.3, 133.9, 132.6, 130.1, 127.9, 127.8, 124.7, 106.4, 89.5, 81.5, 74.9, 73.5, 67.4, 64.1, 60.4, 57.8, 50.8, 43.9, 31.9, 29.7, 29.3, 26.8, 22.7, 20.6, 19.2, 14.1 ppm;

HRMS(ESI) [M + H]<sup>+</sup> calculated for C<sub>38</sub>H<sub>40</sub>O<sub>8</sub>Si: 653.2492, found 653.2570;

TLC: R<sub>f</sub> = 0.3 (Pentane/Ethyl acetate = 2/1).

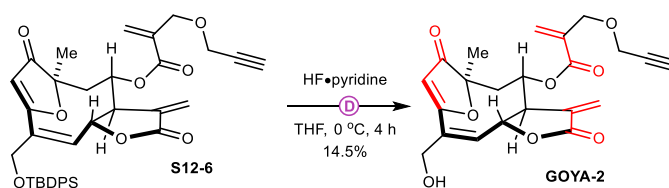

To a solution of **S12-6** (2.3 mg, 3.5 μmol) in THF (1.0 mL) at 0 °C, was added dropwise a solution of hydrogen fluoride pyridine (hydrogen fluoride ~70%, 10 μL) in THF (0.2 mL). The mixture was stirred 4 hours at 0 °C and quenched with saturated NaHCO<sub>3</sub> (0.5 mL). The mixture was then extracted with Et<sub>2</sub>O (2.0 mL × 2), and the combined organic layers were washed with brine (1.0 mL), dried over MgSO<sub>4</sub>, and purified by PTLC (Pentane/Ethyl acetate = 2/8) to give **GOYA-2** (0.21 mg, yield 14.5%) as a waxy solid.

Data of **GOYA-2**: waxy solid;

$[\alpha]_D^{20}$  -14 (c 0.1, CHCl<sub>3</sub>);

<sup>1</sup>H NMR (500 MHz, CDCl<sub>3</sub>) δ 6.30 (s, 1H), 6.23 (s, 2H), 5.91 (s, 1H), 5.82 (s, 1H), 5.51 (s, 1H), 5.35 (s, 1H), 4.63–4.40 (m, 3H), 4.24–4.12 (m, 4H), 3.83 (d, *J* = 2.4 Hz, 1H), 2.58–2.48 (m, 1H), 2.47 (t, *J* = 2.3 Hz, 1H), 2.37 (dd, *J* = 15.7, 8.7 Hz, 1H), 1.32 (s, 9H) ppm;

<sup>13</sup>C NMR (126 MHz, CDCl<sub>3</sub>) δ 196.2, 184.1, 135.6, 132.8, 127.9, 124.9, 106.6, 89.6, 81.0, 75.0, 73.4, 63.1, 57.6, 50.8, 43.2, 31.8, 29.3, 22.7, 20.6, 13.9 ppm; Traces of water (integration = 135.65) and grease (integration = 75.65). Purity 19%. DMSO stock solutions have been prepared by weighting residues after high vacuum evaporation.

HRMS(ESI) [M + H]<sup>+</sup> calculated for C<sub>22</sub>H<sub>22</sub>O<sub>8</sub>: 414.1315, found 415.1394;

TLC: R<sub>f</sub> = 0.25 (CH<sub>2</sub>Cl<sub>2</sub>/Ethyl acetate = 1/1).

## h) Experimental procedures for Figure 2

### General information

**Biological materials.** All materials were purchased from Sigma Aldrich unless otherwise stated. DMEM/High glucose medium, F12-K media, phosphate buffered saline (PBS), MEM Non-Essential Amino Acids, Penicillin-Streptomycin (Pen/Strep) and Trypsin-EDTA were obtained from Life Technologies. Protein concentration was determined using a Q-Bit assay. HeLa cell line (Adenocarcinoma), PC3 cell line (Prostate; derived from metastatic site: bone), HT29 cell line (Colorectal adenocarcinoma), U2OS cell line (Metastatic: lung, other bones), SW620 cell line (Colorectal adenocarcinoma) obtained from ATCC. IPO5 (Sigma-Aldrich, HPA056548) antibody was purchased from Sigma Aldrich. Phospho-AKT (Ser 473) antibody was purchased from Cell signaling. Karyopherin  $\beta$ 1, Karyopherin  $\beta$ 2, IPO7, IPO8 and IPO12 antibodies were purchased from Santa Cruz biotechnology. UBA1, ACLY, RASAL2,  $\beta$ -actin, anti-rabbit and anti-rabbit Alexa Fluor 488 antibodies were purchased from ABCAM. Images were obtained by image stacking (Confocal microscope Zeiss LSM800). Fluorescence measured with ImageJ software.

**Cell culture and preparation of lysates.** HeLa, PC3, HT29, U2OS and SW620 cells were maintained in their corresponding media supplemented with 10% (v/v) fetal calf serum (FCS) and Penicillin-Streptomycin 1% (v/v). Cells were grown at 37 °C under 5% CO<sub>2</sub> atmosphere in a humidified incubator. Cells were allowed to grow to confluence and harvested by scraping, centrifuged at 4 °C and resuspended in PBS. Cells were then lysed by sonication in lysis buffer and protein concentration was determined using a Q-Bit assay.

**Pull-down experiments.** PC3 cells were seeded (350,000 cells/mL) on 10 cm dishes and grown to confluence for 2 days. The cells were harvested and lysates (3 mg/mL, 100  $\mu$ L each) were prepared as described above. Lysates were treated with DMSO (1  $\mu$ L) or goyazensolide 10  $\mu$ M (1 mM, 1  $\mu$ L) for 30 minutes and then incubated with **GOYA-2** 10  $\mu$ M (1 mM, 1  $\mu$ L) for 30 minutes. Click reaction was achieved by addition of **desthiobiotinylated Cy3-N<sub>3</sub>** (20  $\mu$ M, 50X stock in DMSO, **Figure S13** for synthesis), TCEP (1 mM, 50X fresh stock in H<sub>2</sub>O), TBTA (100  $\mu$ M, 16X stock in DMSO: *t*Butanol = 1:4), copper (II) sulfate (1 mM, 50X stock in H<sub>2</sub>O) and incubated for 1 hour at room temperature in the dark. Proteins were precipitated by adding 450  $\mu$ L of cold MeOH, 117  $\mu$ L of cold CHCl<sub>3</sub> and 350  $\mu$ L of cold H<sub>2</sub>O, vortexed and centrifuged for 5 minutes at 14000 g (4 °C). The protein layer was isolated, dried and solubilized in 100  $\mu$ L of 0.2% SDS in PBS via sonication. Tubes were centrifuged at 4,700 g for 5 minutes, and soluble fractions were transferred to new tubes. Streptavidin agarose beads (25  $\mu$ L) were added and incubated for 2 hours. Supernatant was discarded and the beads were washed three times with PBS (100  $\mu$ L). Then 10  $\mu$ L of 2% SDS and 5  $\mu$ L of Laemmli buffer were added to the beads and heated 5 minutes at 95°C. Proteins were separated using a 10% SDS-PAGE gel. Gels were visualized at 625 nm using a fluorescence scanner.

**In-Gel tryptic digestion.** The bands cutted from the SDS-PAGE were cut in smaller pieces and washed twice with a mixture of 50% NH<sub>4</sub>HCO<sub>3</sub> 50 mM in CH<sub>3</sub>CN, twice with 200  $\mu$ L CH<sub>3</sub>CN, then twice again with 200  $\mu$ L NH<sub>4</sub>HCO<sub>3</sub> 100 mM and finally twice with 200  $\mu$ L

CH<sub>3</sub>CN. The gel fragments were incubated then for 30 minutes at 37 °C with 30 µL of DTT 10mM in H<sub>2</sub>O, followed by 30 minutes with 30 µL iodoacetamide 30 mM in H<sub>2</sub>O. Gel pieces were washed again twice with CH<sub>3</sub>CN, followed by NH<sub>4</sub>HCO<sub>3</sub> 100 mM and finally twice with CH<sub>3</sub>CN. Then, the in-gel digestion started with 30 µL of a mixture of Trypsin + Glu-C + Chymotrypsin (1.0 µg each in 500 µL of NH<sub>4</sub>HCO<sub>3</sub> 50 mM) at 37 °C for 18 hours. 50 µL of NH<sub>4</sub>HCO<sub>3</sub> 50 mM were added to the digested mixture and incubate for 10 minutes at room temperature. The supernatant was removed and place into a microtube and the remaining gel fragments were incubated for 10minutes with 50 µL of extraction *buffer 1* (20% CH<sub>3</sub>CN, 80% H<sub>2</sub>O, 1% formic acid). The supernatant was then collected and the fragments incubate for another 10 minutes with 50 µL of extraction *buffer 2* (95% CH<sub>3</sub>CN, 5% H<sub>2</sub>O, 1% formic acid). The combined supernatants were lyophilized and submitted to MS/MS analysis.

**LC-MS/MS analysis.** Peptides were resuspended in water with 2% MeCN, 0.1% formic acid (FA) and analyzed using an EASY-nLC 1000 nano-UHPLC coupled to an Orbitrap Fusion mass spectrometer (Thermo Scientific). Chromatography was performed on a 50 cm EASY-spray column (75µm i.d.), LC solvents were 0.1% formic acid in H<sub>2</sub>O (Buffer A) and 0.1% FA in MeCN (Buffer B), peptides were eluted into the mass spectrometer at a flow rate of 300 nL/min over a 30 minutes linear gradient (5-35% Buffer B) at 45 °C, data was acquired in a data-dependent mode, MS scans were acquired at 120000 resolution with an AGC-target of 20000 and 118 ms fill-time, and MS/MS-scans using HCD, CID and EThcD fragmentation were acquired in the Orbitrap on each selected precursor using an AGC-target of 20000 and a fill time of 200 ms.

**Mass spectrometry analysis.** MS data were analyzed using ProteomeDiscoverer 2.0 software (Thermo Scientific) and MSMS-spectra were grouped according by fragmentation technique and searched against the homo sapiens Uniprot database using the Sequest and MS-Amanda algorithms. Search against b- and y-ions was specified for HCD and CID spectra and against c- and z-ions for EThcD spectra. A search tolerance of 10 ppm was applied for the precursor and 0.05 Da for fragmen-ions. Oxidation of methionine and modification of cysteines by carbamidomethylation or by Goyazensolide or thiolated Goyazensolide were allowed as variable modifications.

### **Safety Statement**

No unexpected or unusually high safety hazards were encountered.

**Figure S13.** Synthesis of Desthiobiotinylated Cy3-N<sub>3</sub>.

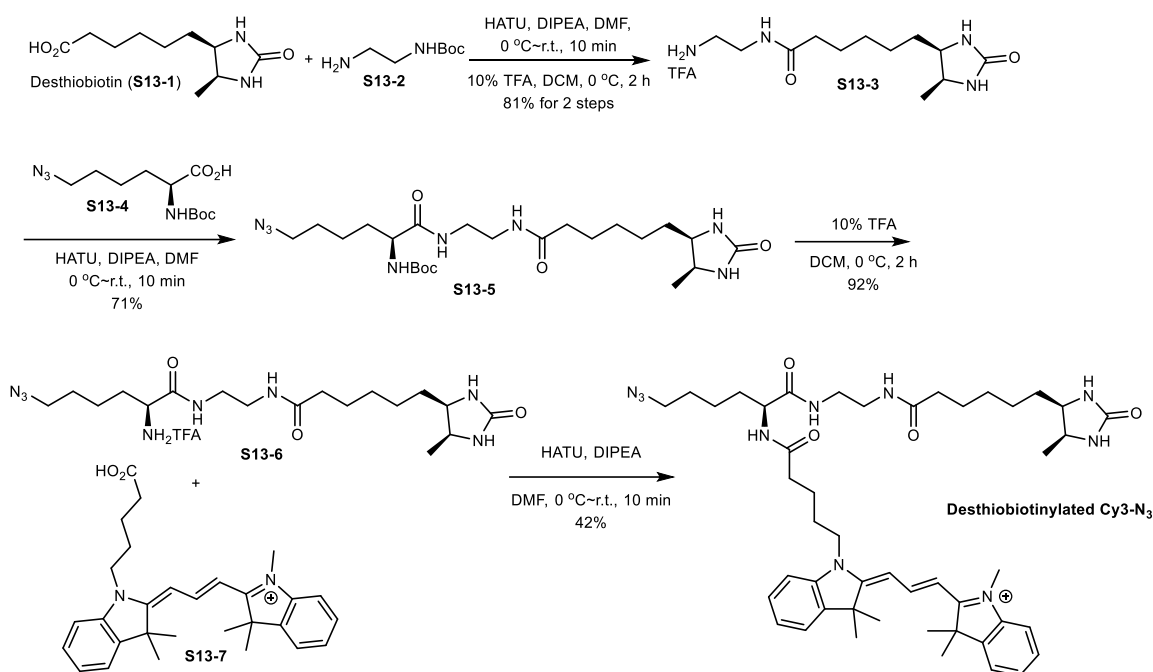

To a solution of desthiobiotin **S13-1** (100 mg, 0.46 mmol), N-Boc-ethylenediamine **S13-2** (90 mg, 0.56 mmol), HATU (213 mg, 0.56 mmol) in DMF (4.0 mL) was added Et<sub>3</sub>N (190  $\mu$ L, 1.38 mmol) at 0 °C. The mixture was allowed to warm to room temperature stirred 10 more minutes, and then diluted with ethyl acetate (20 mL) and HCl 0.1N (10 mL). The solutions was extracted with ethyl acetate (10 mL  $\times$  3) and the combined organic layers were washed with brine (20 mL) dried over MgSO<sub>4</sub>, concentrated and purified by silica-gel chromatography (CH<sub>2</sub>Cl<sub>2</sub>/ ethyl acetate = 8/2) to give the amide as a pale-yellow oil. The crude product was dissolved in dichloromethane (3.0 mL) and cooled down to 0 °C. Trifluoro acetic acid (0.3 mL) was added to the solution and the reaction was carried out for 2 hours at 0 °C. The solvents were evaporated to give **S13-3** as a yellow oil (137 mg, yield 81%).

To a solution of deprotected amine **S13-3** (137 mg, 0.37 mmol), (S)-6-azido-2-(tert-butoxycarbonylamino) hexanoic acid **S13-4** (121 mg, 0.44 mmol), HATU (167 mg, 0.44 mmol) in DMF (4.0 mL) was added Et<sub>3</sub>N (153  $\mu$ L, 1.11 mmol) at 0 °C. The mixture was allowed to warm to room temperature, stirred for 10 more minutes, and then was diluted with ethyl acetate (20 mL) and HCl 0.1N (10 mL). The solution was extracted with ethyl acetate (10 mL  $\times$  3), and the combined organic layers were washed with brine (20 mL), dried over MgSO<sub>4</sub>, concentrated and purified by silica-gel chromatography (CH<sub>2</sub>Cl<sub>2</sub>/ethyl acetate = 7/3) to give the amide **S13-5** as a pale-yellow oil (188 mg, yield 71%).

HRMS(ESI) [M + Na]<sup>+</sup> calculated for C<sub>23</sub>H<sub>42</sub>O<sub>8</sub>N<sub>5</sub>: 511.3278, found 511.3366.

**S13-5** (188 mg, 0.37 mmol) was dissolved in dichloromethane (3.0 mL) and cooled down to 0 °C. Trifluoro acetic acid (0.3 mL) was added to the solution and the reaction was carried out for 2 hours at 0 °C. The solvents were evaporated to give a yellow oil **S13-6** (178 mg, yield 92%).



To a solution of **S13-6** (178 mg, 0.34 mmol), Cy3 **S13-7** (194 mg, 0.34 mmol), HATU (155 mg, 0.41 mmol) in DMF (5.0 mL) was added Et<sub>3</sub>N (141 μL, 1.02 mmol) at 0 °C. The mixture was allowed to warm to room temperature and stirred 10 minutes. The mixture directly purified by reverse chromatography (H<sub>2</sub>O/acetonitrile 8/2) followed by lyophilization to give **Desthiobiotinylated Cy3-N<sub>3</sub>** as a pink powder (135 mg, yield 42%).

HRMS(ESI) [M + H]<sup>+</sup> calculated for C<sub>47</sub>H<sub>67</sub>N<sub>10</sub>O<sub>4</sub>: 835.5341, found 835.5364.

**Figure S14.** Competition experiment with **GOYA-2** with different incubation time.

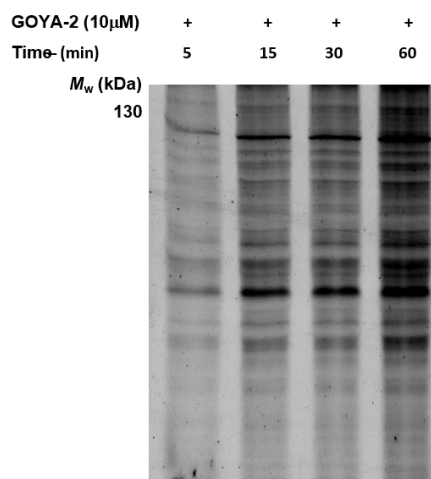

SW620 cell lysate was labeled with 10 μM of **GOYA-2** in different incubation time followed by CuAAC reaction with **Cy3-N<sub>3</sub>**. The labeling experiment shows optimal conditions with 30 min of incubation.

**Figure S15.** Competition experiments with **GOYA-2** with different cell lines.

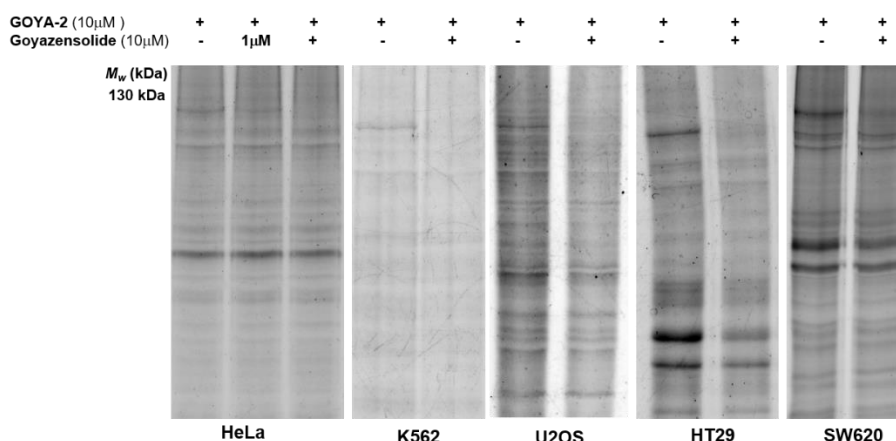

The cell lysates were preincubate for 30 min with the indicated concentration of goyazensolide and then labelled with 10 μM of **GOYA-2** followed by CuAAC reaction with **Cy3-N<sub>3</sub>**. The labelling/competition experiment showed the target is not cell-line specific. **Cy3-N<sub>3</sub>** = Cyanine3-azide.

**Table S17.** Full protein list.

|    | Description                                                                                           | Coverage        | Unique Peptides | MW [kDa]      |
|----|-------------------------------------------------------------------------------------------------------|-----------------|-----------------|---------------|
| 1  | <b>Importin-5 OS=Homo sapiens GN=IPO5 PE=1 SV=4</b>                                                   | <b>40.65634</b> | <b>63</b>       | <b>123.55</b> |
| 2  | <b>Pyruvate carboxylase, mitochondrial OS=Homo sapiens GN=PC PE=1 SV=2</b>                            | <b>32.85229</b> | <b>52</b>       | <b>129.55</b> |
| 3  | Heterogeneous nuclear ribonucleoprotein U OS=Homo sapiens GN=HNRNPU PE=1 SV=6                         | 28.84848        | 33              | 90.528        |
| 4  | Acetyl-CoA carboxylase 1 OS=Homo sapiens GN=ACACA PE=1 SV=2                                           | 10.99744        | 27              | 265.39        |
| 5  | Keratin, type II cytoskeletal 1 OS=Homo sapiens GN=KRT1 PE=1 SV=6                                     | 36.3354         | 26              | 65.999        |
| 6  | <b>Ubiquitin-like modifier-activating enzyme 1 OS=Homo sapiens GN=UBA1 PE=1 SV=3</b>                  | <b>17.76938</b> | <b>19</b>       | <b>117.77</b> |
| 7  | Alanine--tRNA ligase, cytoplasmic OS=Homo sapiens GN=AARS PE=1 SV=2                                   | 17.56198        | 19              | 106.74        |
| 8  | <b>ATP-citrate synthase OS=Homo sapiens GN=ACLY PE=1 SV=3</b>                                         | <b>13.44233</b> | <b>18</b>       | <b>120.76</b> |
| 9  | Keratin, type I cytoskeletal 10 OS=Homo sapiens GN=KRT10 PE=1 SV=6                                    | 28.42466        | 16              | 58.792        |
| 10 | Keratin, type I cytoskeletal 9 OS=Homo sapiens GN=KRT9 PE=1 SV=3                                      | 28.73194        | 15              | 62.027        |
| 11 | Importin-7 OS=Homo sapiens GN=IPO7 PE=1 SV=1                                                          | 11.75337        | 11              | 119.44        |
| 12 | iRT Kit Fusion                                                                                        | 89.55224        | 10              | 14.157        |
| 13 | Ran-binding protein 6 OS=Homo sapiens GN=RANBP6 PE=1 SV=2                                             | 6.244344        | 10              | 124.63        |
| 14 | Matrin-3 OS=Homo sapiens GN=MATR3 PE=1 SV=2                                                           | 10.27155        | 9               | 94.565        |
| 15 | Heterogeneous nuclear ribonucleoprotein U-like protein 2 OS=Homo sapiens GN=HNRNPUL2 PE=1 SV=1        | 9.638554        | 9               | 85.052        |
| 16 | Keratin, type II cytoskeletal 2 epidermal OS=Homo sapiens GN=KRT2 PE=1 SV=2                           | 19.40532        | 8               | 65.393        |
| 17 | Heat shock protein 105 kDa OS=Homo sapiens GN=HSPH1 PE=1 SV=1                                         | 9.440559        | 8               | 96.804        |
| 18 | Keratin, type II cytoskeletal 5 OS=Homo sapiens GN=KRT5 PE=1 SV=3                                     | 18.30508        | 8               | 62.34         |
| 19 | Transcription intermediary factor 1-beta OS=Homo sapiens GN=TRIM28 PE=1 SV=5                          | 8.263473        | 8               | 88.493        |
| 20 | Fatty acid synthase OS=Homo sapiens GN=FASN PE=1 SV=3                                                 | 3.345281        | 8               | 273.25        |
| 21 | Heat shock 70 kDa protein 4 OS=Homo sapiens GN=HSPA4 PE=1 SV=4                                        | 8.452381        | 8               | 94.271        |
| 22 | Trifunctional purine biosynthetic protein adenosine-3 OS=Homo sapiens GN=GART PE=1 SV=1               | 7.425743        | 8               | 107.7         |
| 23 | Putative elongation factor 1-alpha-like 3 OS=Homo sapiens GN=EEF1A1P5 PE=5 SV=1                       | 17.74892        | 8               | 50.153        |
| 24 | Elongation factor 1-alpha 1 OS=Homo sapiens GN=EEF1A1 PE=1 SV=1                                       | 17.74892        | 8               | 50.109        |
| 25 | Acetyl-CoA carboxylase 2 OS=Homo sapiens GN=ACACB PE=1 SV=3                                           | 3.091945        | 7               | 276.37        |
| 26 | Protein transport protein Sec24C OS=Homo sapiens GN=SEC24C PE=1 SV=3                                  | 5.758684        | 6               | 118.25        |
| 27 | Eukaryotic translation initiation factor 3 subunit C-like protein OS=Homo sapiens GN=EIF3CL PE=3 SV=1 | 5.36105         | 6               | 105.41        |
| 28 | Eukaryotic translation initiation factor 3 subunit C OS=Homo sapiens GN=EIF3C PE=1 SV=1               | 5.366922        | 6               | 105.28        |

|    |                                                                                             |          |   |        |
|----|---------------------------------------------------------------------------------------------|----------|---|--------|
| 29 | Keratin, type II cytoskeletal 6B OS=Homo sapiens<br>GN=KRT6B PE=1 SV=5                      | 13.65248 | 5 | 60.03  |
| 30 | Keratin, type II cytoskeletal 6C OS=Homo sapiens<br>GN=KRT6C PE=1 SV=3                      | 13.47518 | 5 | 59.988 |
| 31 | Keratin, type II cytoskeletal 6A OS=Homo sapiens<br>GN=KRT6A PE=1 SV=3                      | 13.47518 | 5 | 60.008 |
| 32 | Unconventional myosin-Ib OS=Homo sapiens GN=MYO1B<br>PE=1 SV=3                              | 3.961268 | 5 | 131.9  |
| 33 | Elongation factor 1-alpha 2 OS=Homo sapiens<br>GN=EEF1A2 PE=1 SV=1                          | 9.50324  | 5 | 50.438 |
| 34 | Chymotrypsinogen B2 OS=Homo sapiens GN=CTRB2<br>PE=2 SV=2                                   | 10.64639 | 4 | 27.905 |
| 35 | Chymotrypsinogen B OS=Homo sapiens GN=CTRB1 PE=2<br>SV=1                                    | 10.64639 | 4 | 27.852 |
| 36 | 116 kDa U5 small nuclear ribonucleoprotein component<br>OS=Homo sapiens GN=EFTUD2 PE=1 SV=1 | 4.835391 | 4 | 109.37 |
| 37 | Heat shock protein HSP 90-beta OS=Homo sapiens<br>GN=HSP90AB1 PE=1 SV=4                     | 5.662983 | 4 | 83.212 |
| 38 | Staphylococcal nuclease domain-containing protein 1<br>OS=Homo sapiens GN=SND1 PE=1 SV=1    | 4.395604 | 4 | 101.93 |
| 39 | Phosphorylase b kinase regulatory subunit beta<br>OS=Homo sapiens GN=PHKB PE=1 SV=3         | 3.385178 | 4 | 124.81 |
| 40 | Tubulin alpha-1C chain OS=Homo sapiens GN=TUBA1C<br>PE=1 SV=1                               | 9.35412  | 4 | 49.863 |
| 41 | Tubulin alpha-1B chain OS=Homo sapiens GN=TUBA1B<br>PE=1 SV=1                               | 9.312639 | 4 | 50.12  |
| 42 | Tubulin alpha-1A chain OS=Homo sapiens GN=TUBA1A<br>PE=1 SV=1                               | 9.312639 | 4 | 50.104 |
| 43 | Keratin, type I cytoskeletal 14 OS=Homo sapiens<br>GN=KRT14 PE=1 SV=4                       | 13.55932 | 3 | 51.529 |
| 44 | Keratin, type II cytoskeletal 2 oral OS=Homo sapiens<br>GN=KRT76 PE=1 SV=2                  | 6.269592 | 3 | 65.8   |
| 45 | Heat shock protein HSP 90-alpha A2 OS=Homo sapiens<br>GN=HSP90AA2P PE=1 SV=2                | 8.746356 | 3 | 39.34  |
| 46 | Heat shock protein HSP 90-alpha OS=Homo sapiens<br>GN=HSP90AA1 PE=1 SV=5                    | 4.098361 | 3 | 84.607 |
| 47 | Ubiquitin-like modifier-activating enzyme 6 OS=Homo<br>sapiens GN=UBA6 PE=1 SV=1            | 2.471483 | 3 | 117.9  |
| 48 | Trypsin-3 OS=Homo sapiens GN=PRSS3 PE=1 SV=2                                                | 8.552632 | 3 | 32.508 |
| 49 | Tubulin alpha-3E chain OS=Homo sapiens GN=TUBA3E<br>PE=1 SV=2                               | 5.777778 | 3 | 49.827 |
| 50 | Tubulin alpha-3C/D chain OS=Homo sapiens GN=TUBA3C<br>PE=1 SV=3                             | 5.777778 | 3 | 49.928 |
| 51 | Actin, cytoplasmic 2 OS=Homo sapiens GN=ACTG1 PE=1<br>SV=1                                  | 8.266667 | 3 | 41.766 |
| 52 | Actin, cytoplasmic 1 OS=Homo sapiens GN=ACTB PE=1<br>SV=1                                   | 8.266667 | 3 | 41.71  |
| 53 | Asparagine synthetase [glutamine-hydrolyzing]<br>OS=Homo sapiens GN=ASNS PE=1 SV=4          | 5.525847 | 3 | 64.329 |
| 54 | Drebrin OS=Homo sapiens GN=DBN1 PE=1 SV=4                                                   | 5.701079 | 3 | 71.385 |
| 55 | Filamin-A OS=Homo sapiens GN=FLNA PE=1 SV=4                                                 | 1.511145 | 3 | 280.56 |

**Figure S16.** Pyruvate carboxylase as non-competed target.

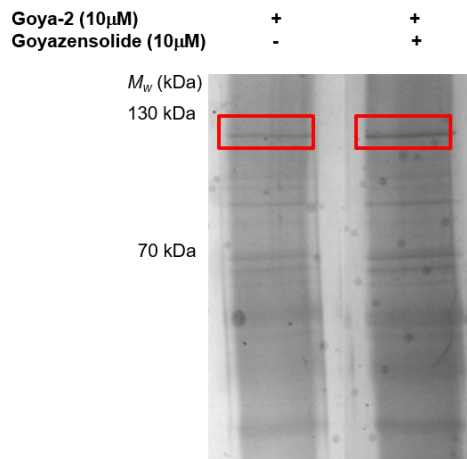

Treatment of PC3 cell lysate with DMSO or 10  $\mu$ M goyazensolide for 30 min followed by treatment with **GOYA-2** (10  $\mu$ M, 30 min). CuAAC reaction with the biotinylated fluorophore and streptavidin enrichment, SDS-PAGE followed by silver staining, gave a band that was not eliminated upon competition with 10  $\mu$ M goyazensolide. MS analysis from tryptic in-gel digests of these bands yielded Pyruvate Carboxylase (red rectangle).

**Full gel of Figure 2d.** Immunoblot of IPO5, ACLY and UBA1 (Full gels and western blots).

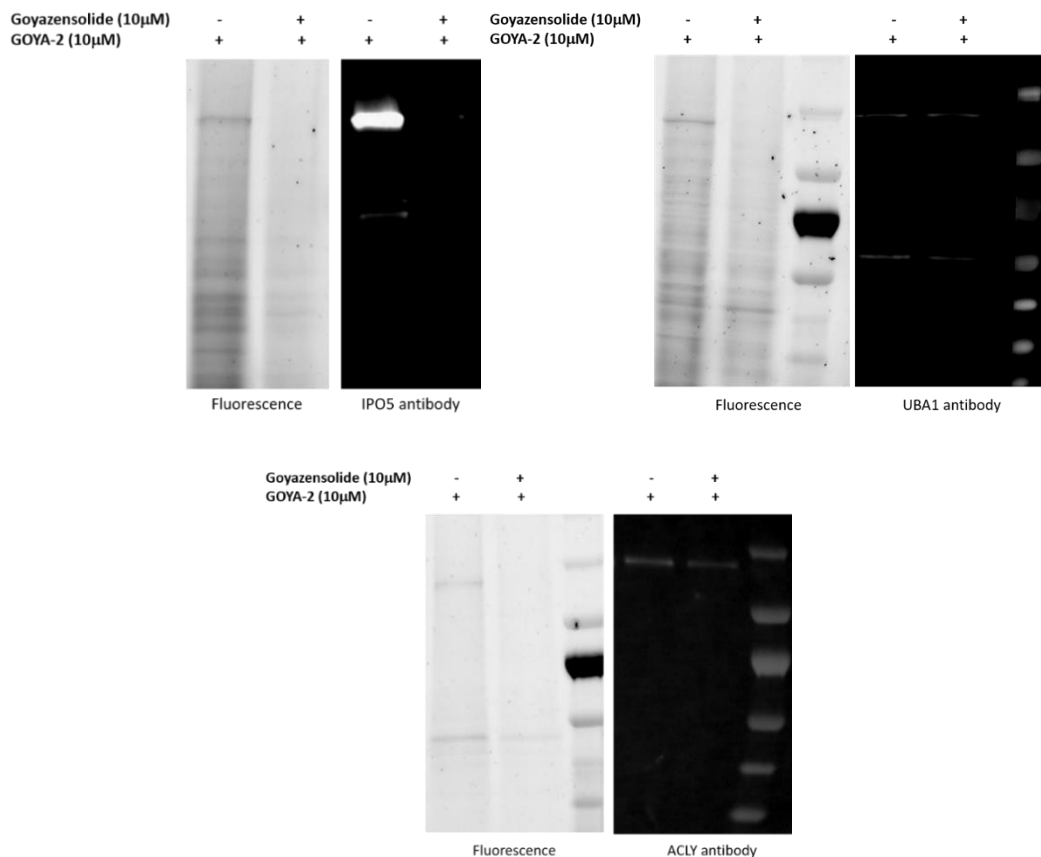

Western blots of  $\alpha$ -IPO5,  $\alpha$ -UBA1 and  $\alpha$ -ACLY. SDS-PAGE/Immunoblot of goyazensolide upon treatment of SW620 lysate with DMSO or 10  $\mu$ M goyazensolide for 30 min followed by treatment with **GOYA-2** (10  $\mu$ M, 30 min). CuAAC reaction with the desthiobiotinylated fluorophore, streptavidin enrichment and SDS-PAGE.

**Figure S17.** Goyazensolide is a selective binder for IPO5 compared to other importins.

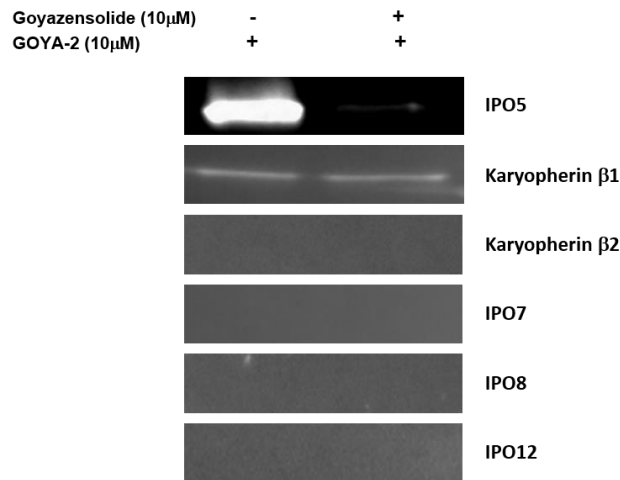

Western blots of  $\alpha$ -IPO5,  $\alpha$ -KPNB1,  $\alpha$ -Karyopherin  $\beta$ 2,  $\alpha$ -IPO7,  $\alpha$ -IPO8,  $\alpha$ -IPL12. SDS-PAGE/Immunoblot of goyazensolide upon treatment of SW620 lysate with DMSO or 10  $\mu$ M goyazensolide for 30 min followed by treatment with **GOYA-2** (10  $\mu$ M, 30 min). CuAAC reaction with the desthiobiotinylated fluorophore, streptavidin enrichment and SDS-PAGE.

### i) Experimental procedures for Figure 3

**Figure S18.** Competition experiment with 50  $\mu\text{M}$  of **1-17** and **32**.

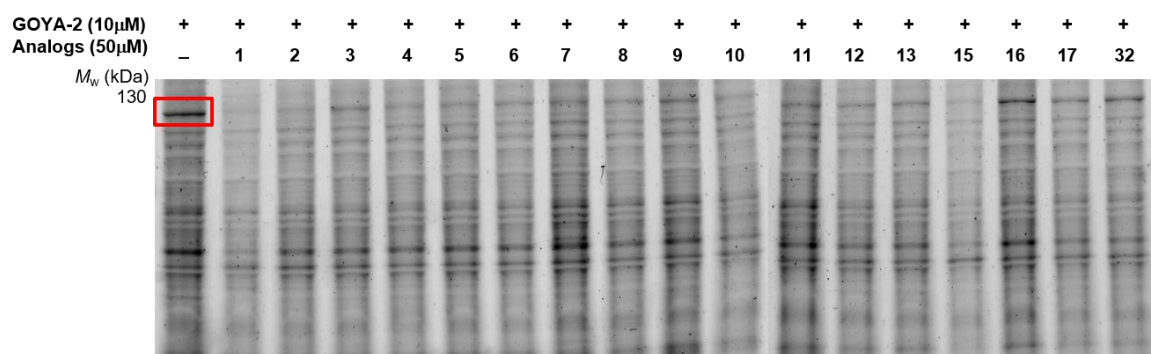

Goyzensolide and atripliciolide selectively bind IPO5 versus other members of the same family of heliangolides. Competition experiment. A SW620 Lysate was incubated for 30 minutes with DMSO or one of the natural products (50  $\mu\text{M}$ ) for 30 min, and then labeled with 10  $\mu\text{M}$  of **GOYA-2** followed by CuAAC reaction with **Cy3-N<sub>3</sub>**. The labelling/competition experiment shows selective binding of goyzensolide (**1**) and atripliciolide (**2**) to IPO5 protein.

### Quantification (ImageJ software)

**Figure S19.** Competition experiment with 10  $\mu\text{M}$  of analogs **1-17** and **32**.

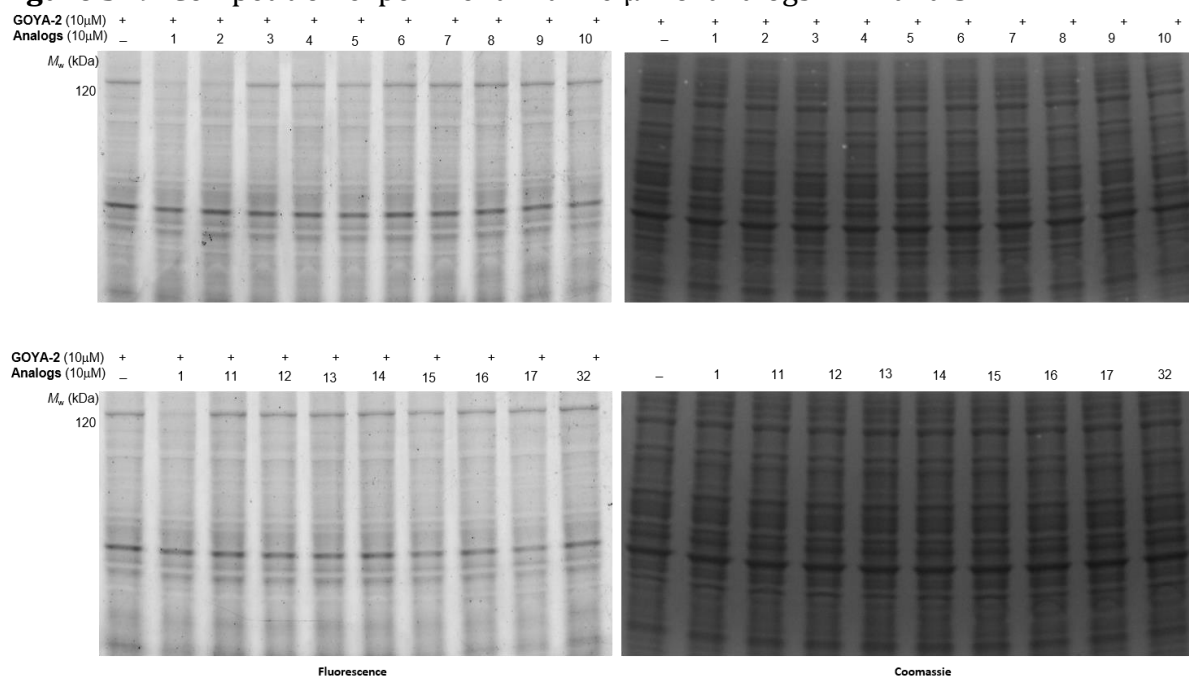

PC3 cell lysate were preincubate for 30 min with 10  $\mu\text{M}$  of DMSO or analogs and then labeled with 10  $\mu\text{M}$  of **GOYA-2** followed by CuAAC reaction with **Cy3-N<sub>3</sub>**. Proteins were separated using a 10% SDS-PAGE gel. Gels were visualized at 625 nm using a fluorescence scanner and then stained with Coomassie brilliant blue.

## Quantification

The binding efficiency was calculated by density of the fluorescent band. We used Coomassie as reference.

### 1) Grey intensity determination for fluorescence

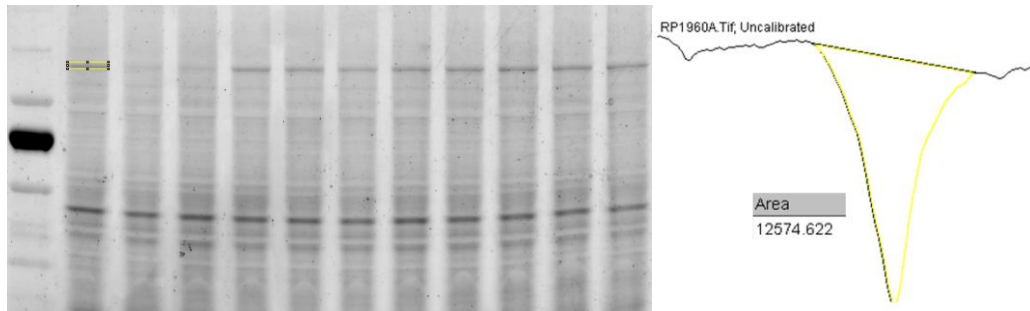

### 2) Grey intensity determination for Coomassie

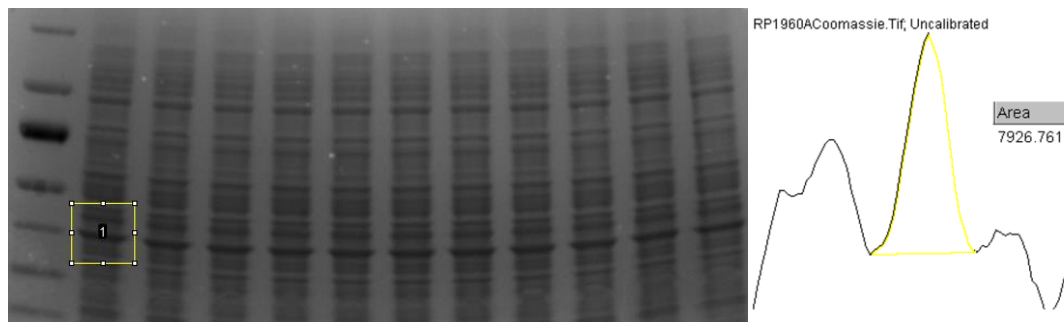

### 3) Calculation

**Table S18.** Quantification for competition.

| <b>Gel1</b>    |                      |                         |          |          |
|----------------|----------------------|-------------------------|----------|----------|
| <b>Analogs</b> | Fluorescence density | Coomassie density (dye) | F/C      | Fraction |
| -              | 9938.844             | 5119.347                | 1.941428 | 1        |
| <b>1</b>       | 3166.782             | 5275.811                | 0.600246 | 0.309177 |
| <b>2</b>       | 2863.225             | 5417.861                | 0.528479 | 0.272211 |
| <b>3</b>       | 8507.43              | 5651.154                | 1.505432 | 0.775425 |
| <b>4</b>       | 7714.823             | 5615.276                | 1.373899 | 0.707675 |
| <b>5</b>       | 6462.045             | 5792.276                | 1.115631 | 0.574645 |
| <b>6</b>       | 9374.38              | 5868.276                | 1.597467 | 0.822831 |
| <b>7</b>       | 9108.43              | 5645.276                | 1.613461 | 0.831069 |
| <b>8</b>       | 10058.309            | 5812.811                | 1.730369 | 0.891287 |
| <b>9</b>       | 9769.966             | 5093.296                | 1.918201 | 0.988036 |
| <b>10</b>      | 11011.693            | 5687.468                | 1.936133 | 0.997272 |
| <b>Gel2</b>    |                      |                         |          |          |
| -              | 11349.67             | 4811.569                | 2.35883  | 1        |
| <b>1</b>       | 3077.953             | 4637.569                | 0.6637   | 0.281368 |
| <b>11</b>      | 11662.79             | 4956.861                | 2.352859 | 0.997469 |
| <b>12</b>      | 10525.38             | 4756.154                | 2.213002 | 0.938178 |
| <b>13</b>      | 10426.62             | 4422.326                | 2.357724 | 0.999531 |
| <b>14</b>      | 10538.92             | 4654.569                | 2.264209 | 0.959886 |
| <b>15</b>      | 8101.48              | 4933.326                | 1.642194 | 0.69619  |
| <b>16</b>      | 10379.97             | 4987.983                | 2.080995 | 0.882215 |
| <b>17</b>      | 9482.602             | 4648.619                | 2.039875 | 0.864783 |
| <b>32</b>      | 11447.21             | 4881.447                | 2.345044 | 0.994156 |

  

| Compound         | Binding Efficiency (%) |
|------------------|------------------------|
| GOYA1            | 100                    |
| 1                | 28                     |
| 2                | 25                     |
| 3                | 75                     |
| 4                | 70                     |
| 5                | 55                     |
| 6                | 80                     |
| 7                | 82                     |
| 8                | 88                     |
| 9                | 98                     |
| 10               | 100                    |
| 11               | 100                    |
| 12               | 92                     |
| 13               | 100                    |
| 14               | 95                     |
| 15               | 69                     |
| 16               | 88                     |
| 17               | 86                     |
| 32               | 99.4                   |
| Natural products | 100                    |

Binding efficiency representation. We observed a difference of binding efficiency by comparison of compounds **1-6** versus **7-13**. The C8 stereochemistry plays an important role in the binding efficiency.



**Pulldown experiment with viruses NLS.** 10  $\mu$ L of 100  $\mu$ M solutions of the corresponding NLS (0.2% SDS in PBS) were added to 30  $\mu$ L of magnetic streptavidin beads and the suspension was shaken for 1 hour. The supernatant was discarded and the beads were washed 5 $\times$  with a solution of 0.2% SDS in PBS. The pre-treated lysates (30  $\mu$ L of treated lysate (3 mg/mL) with DMSO or goyazensolide 10  $\mu$ M for 30 min) were added to the beads and shaken 3 hours. The supernatants were discarded and the beads were washed 2 $\times$  times (20  $\mu$ L) with 0.2% SDS in PBS. 15  $\mu$ L of SDS 5%. For elutions 5  $\mu$ L of Laemli buffer were added to the beads and the mixtures were shaken and heated at 95 $^{\circ}$ C for 3 minutes followed by SDS-PAGE and western blot. Incubation with IPO5 antibody (1 : 1000) followed by rabbit secondary antibody (1 : 10000). Chemoluminescence was used for detection.

**Full gel of Figure 3b.** Immunoblot of competitive interaction between NLS and IPO5. Magnetic streptavidin beads were saturated with corresponding NLS and then incubated for 2 hours with HT29 lysate treated with DMSO or goyazensolide (10  $\mu$ M, 30 min).

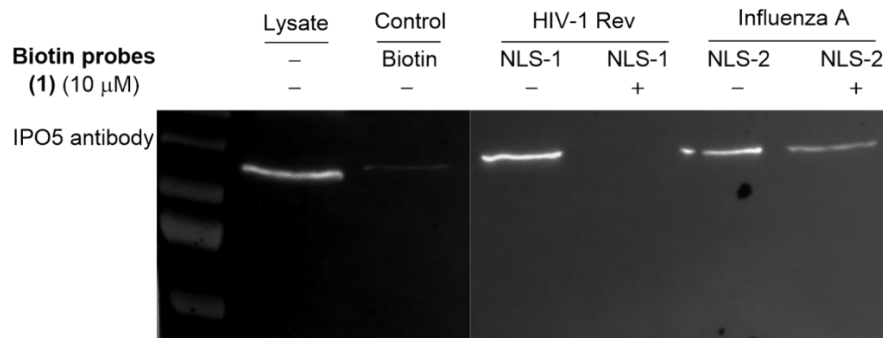

### Preparation of NLS-1 and NLS-2

**NLS-1** and **NLS-2** were synthesized using solid-phase synthesis. General procedure described in PLoS One 2020, 15, e0238089.

**Figure S20. Chemical structures of NLS-1 and NLS-2.**

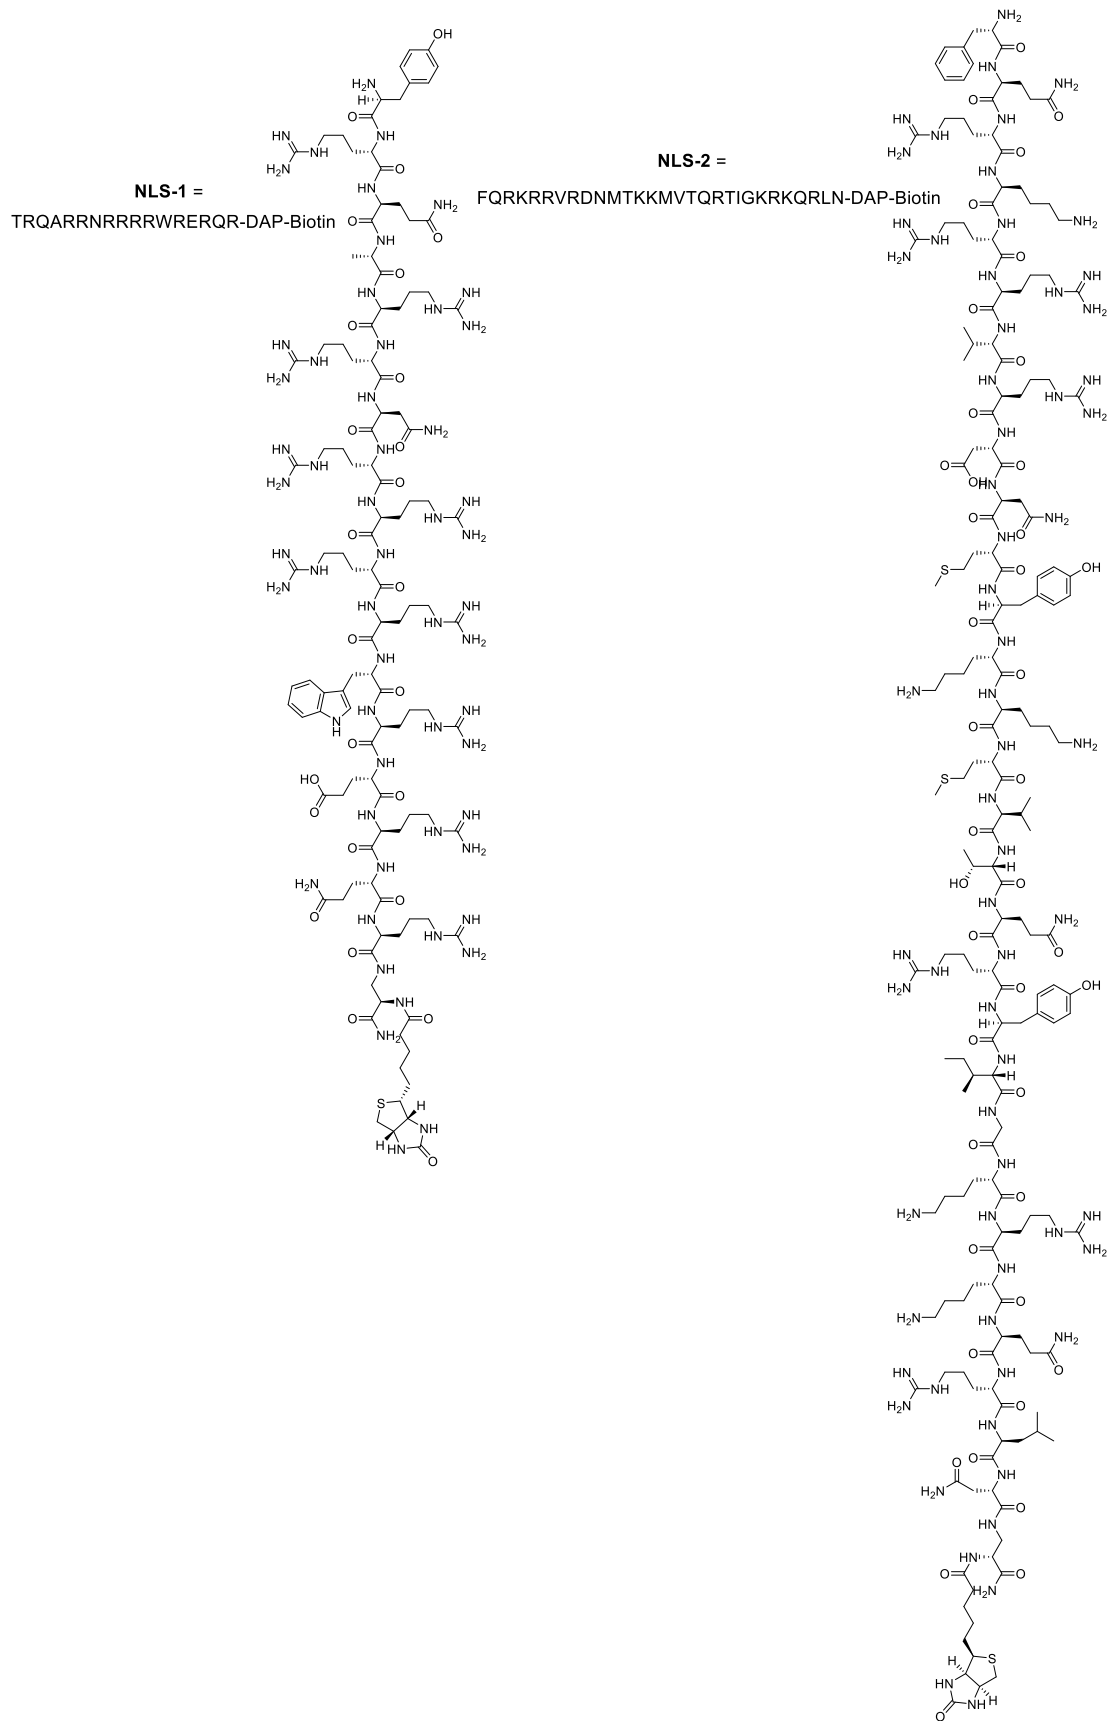

Data of **NLS-1**:

( $C_{110}H_{194}N_{56}O_{26}S$ ),  $[M+H]^+$  isotopic peaks with relative distribution : 2748.53 (100.0%), 2747.53 (84.1%), 2749.54 (35.9%)

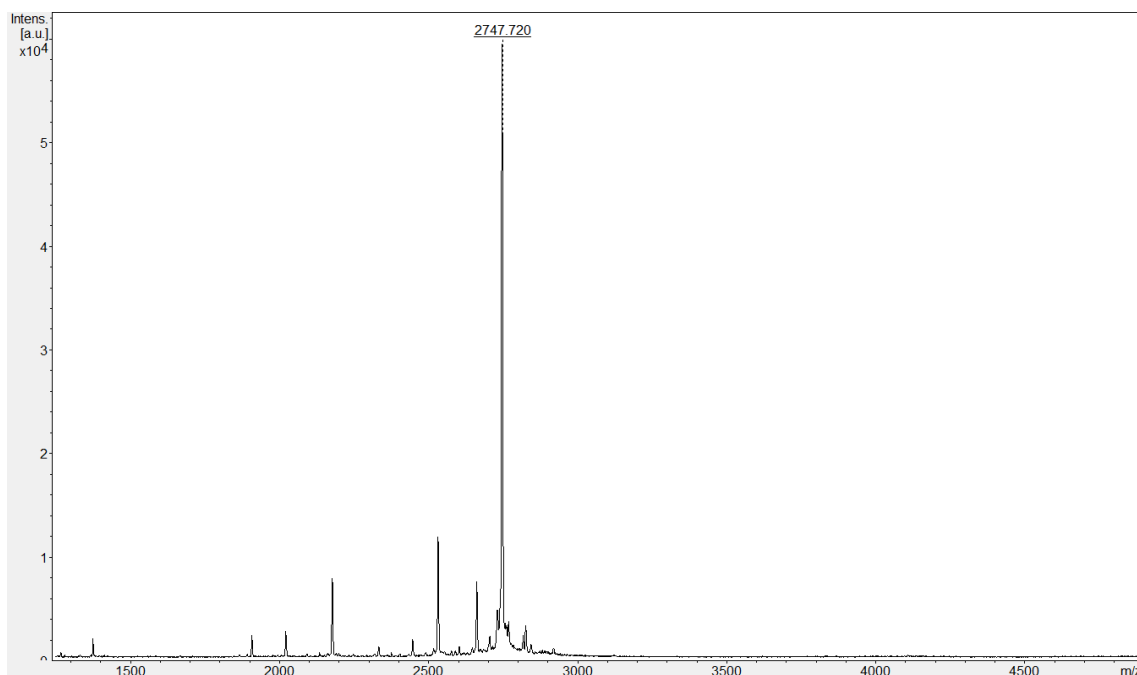

Data of **NLS-2**:

( $C_{167}H_{299}N_{65}O_{42}S_3$ ),  $[M+H]^+$  isotopic peaks with relative distribution : 3984.24 (100.0%), 3985.25 (66.1%), 3983.24 (55.4%), 3986.25 (46.9%), 3985.24 (24.0%)

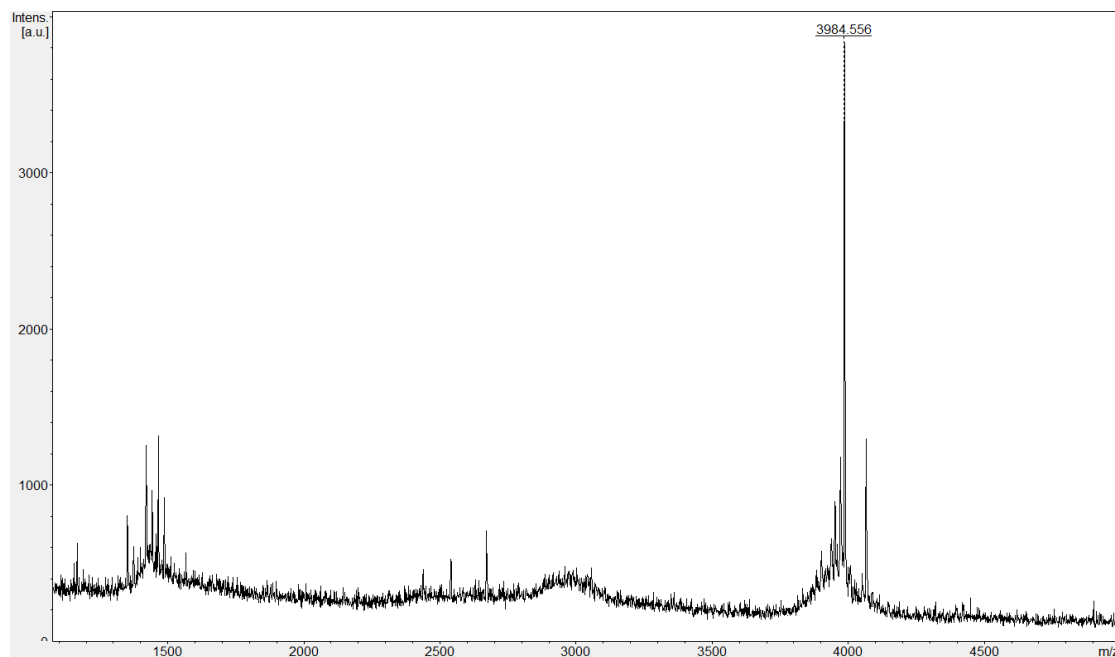

## j) Experimental procedures for Figure 4

**Microscopy.** Cells (50000/well) were seeded on coverslips in a 12 well plate. After 24 hours, cells were treated with goyazensolide (**1**) or DMSO for 3 hours. Cells were fixed with PFA 4% for 25 minutes at room temperature. After a wash 3× with PBS, cells were blocked using 5% BSA + 0.1% saponin in PBS for 2 hours. Then they were incubate with anti IPO5 antibody (1 : 100) in 1% BSA in PBS (30 μL/well) for 3 hours at room temperature.

For the incubation, the coverslips were taken out of the plate, and place on a drop of antibody solution on parafilm in a humidity chamber, then they were washed 3× with PBS, incubated with anti-rabbit AlexaFluor488 (1 : 400), washed 3× with PBS, incubate with Hoescht diluted 2000× in PBS for 10min, washed 3× with PBS, then water and finally the edges were dried. The coverslips were then mounted on a clean slide treated with 5 μL ProlongDiamond per coverslip for 24 hours at room temperatue and finally sealed with nail polish.

### Ratio (cytosol/nucleus) caculation of RASAL2.

**Figure S21. Confocal microscopy images of SW620 cells after treatment with DMSO or goyazensolide.** Ratio of RASAL2 levels in the cytosol and nucleus was calculated applying a threshold mask to quantify fluorescence intensity in the cytosol and in the nucleus.

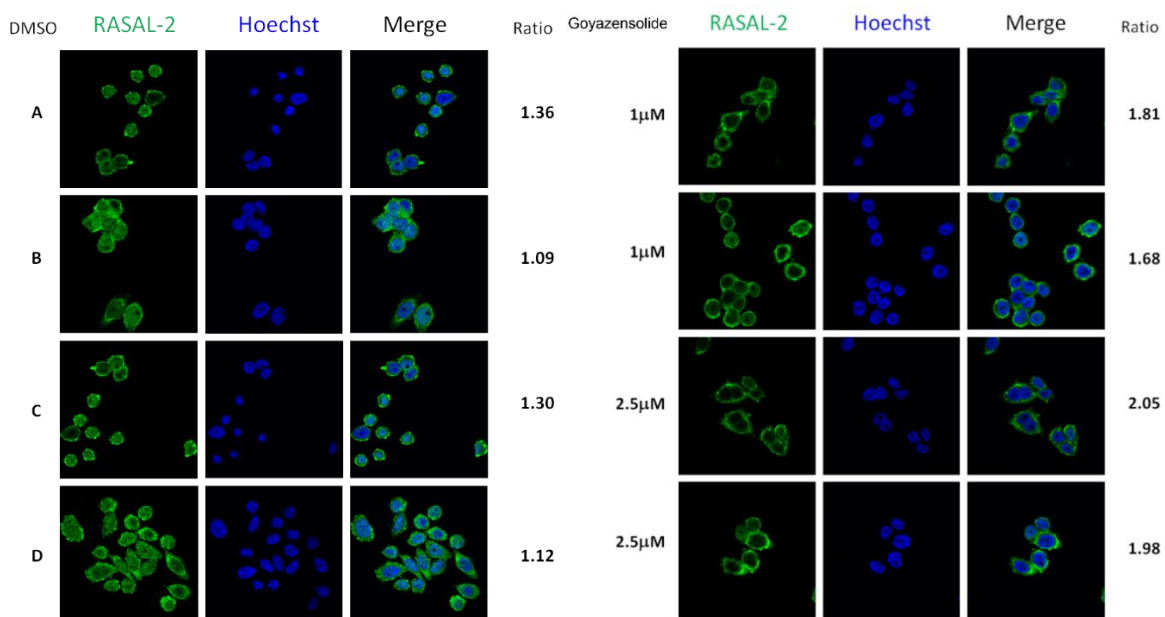

### Calculation of fluorescence intensity in the cytosol/nucleus.

Threshold masks were generated in ImageJ softwqre to calculate the integrated dendency of the signal in the green channel (Alexa488, RASAL2) and blue channel (Hoecht, nuclei).

Step 1 : Cell surface and green density determination.

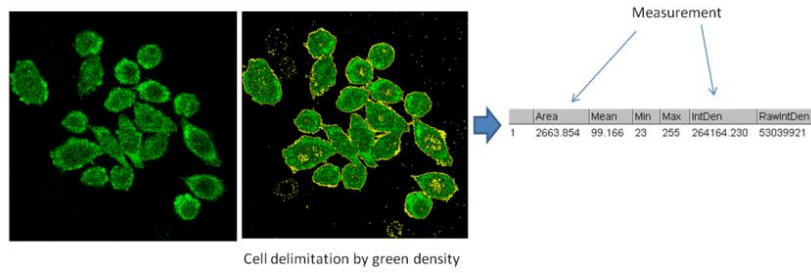

### Step 2 : Determination of the surface and green density within the nucleus

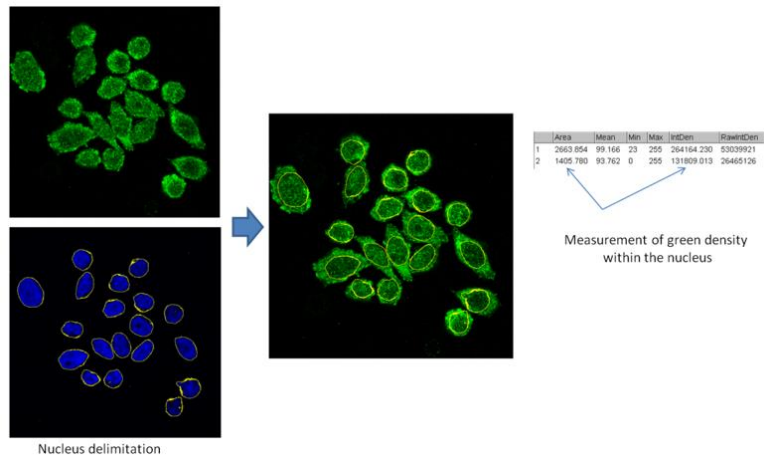

### Step 3 : Determination of the surface and green density within the cytosol by difference

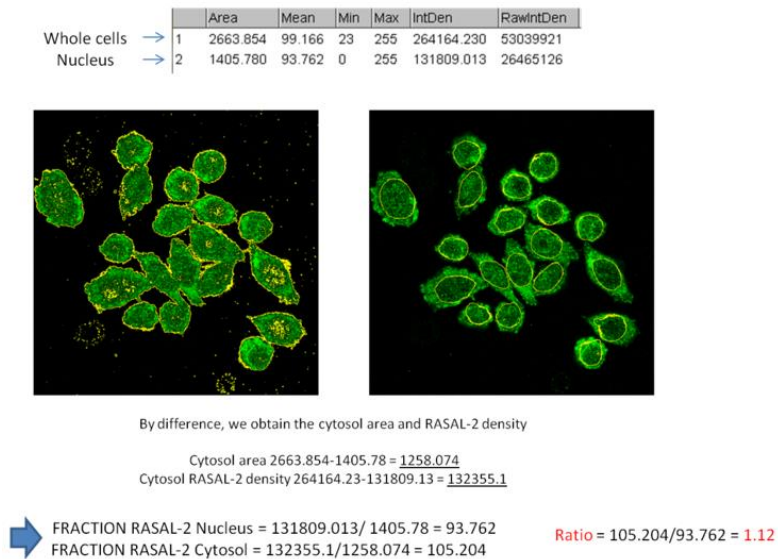

### Step 4 : Ratio calculation to all pictures

**Table S19.** Ratio calculation.

| <b>DMSO</b>          |            |                             |          |          |
|----------------------|------------|-----------------------------|----------|----------|
|                      | Area       | Integrated density          | Int/Area | Ratio    |
| <b>No Treatment</b>  | <b>A</b>   |                             |          |          |
| Whole cells          | 999.836    | 79215.392                   | 79.22839 |          |
| Nucleus              | 524.499    | 35443.651                   | 67.5762  |          |
| Cytosol              | 475.337    | 43771.741                   | 92.0857  | 1.362694 |
|                      | <b>B</b>   |                             |          |          |
| Whole cells          | 1326.899   | 122651.425                  | 92.43464 |          |
| Nucleus              | 726.149    | 64428.407                   | 88.72615 |          |
| Cytosol              | 600.75     | 58223.018                   | 96.91722 | 1.092318 |
|                      | <b>C</b>   |                             |          |          |
| Whole cells          | 1143.299   | 47116.191                   | 41.21073 |          |
| Nucleus              | 559.298    | 20005.295                   | 35.76858 |          |
| Cytosol              | 584.001    | 27110.896                   | 46.42269 | 1.297862 |
|                      | <b>D</b>   |                             |          |          |
| Whole cells          | 2663.854   | 264164.23                   | 99.16618 |          |
| Nucleus              | 1405.78    | 131809.013                  | 93.76219 |          |
| Cytosol              | 1258.074   | 132355.217                  | 105.2046 | 1.122037 |
|                      |            | <b>Average Ratio DMSO</b>   | 1.218728 |          |
| <b>Goyazensolide</b> |            |                             |          |          |
|                      | Area       | Integrated density          | Int/Area | Ratio    |
| <b>Goyazensolide</b> | <b>1A</b>  |                             |          |          |
| Whole cells          | 1036.597   | 70567.839                   | 68.07645 |          |
| Nucleus              | 383.935    | 17332.133                   | 45.1434  |          |
| Cytosol              | 652.662    | 53235.706                   | 81.56704 | 1.806843 |
|                      | <b>1B</b>  |                             |          |          |
| Whole cells          | 2079.43    | 142805.488                  | 68.6753  |          |
| Nucleus              | 1030.202   | 52726.816                   | 51.18105 |          |
| Cytosol              | 1049.228   | 90078.672                   | 85.85233 | 1.677424 |
|                      | <b>25A</b> |                             |          |          |
| Whole cells          | 1452.821   | 70476.786                   | 48.5103  |          |
| Nucleus              | 618.297    | 18677.594                   | 30.20813 |          |
| Cytosol              | 834.524    | 51799.192                   | 62.07034 | 2.054756 |
|                      | <b>25B</b> |                             |          |          |
| Whole cells          | 890.415    | 42677.438                   | 47.92983 |          |
| Nucleus              | 405.471    | 12686.904                   | 31.2893  |          |
| Cytosol              | 484.944    | 29990.534                   | 61.84329 | 1.9765   |
|                      |            | <b>Average Ratio 1 µM</b>   | 1.742134 |          |
|                      |            | <b>Average Ratio 2.5 µM</b> | 2.015628 |          |
|                      |            | <b>Ratio increasing (%)</b> | 65.38786 |          |

**Table S20.** Raw data

| RAW DATA           | ImageJ Software |        | 1 : Whole cells |     | IntDen     | RawIntDen |
|--------------------|-----------------|--------|-----------------|-----|------------|-----------|
|                    | Area            | Mean   | Min             | Max |            |           |
|                    |                 |        | 2 : Nucleus     |     |            |           |
| <b>PICTURE A</b>   | Area            | Mean   | Min             | Max | IntDen     | RawIntDen |
| 1                  | 999.836         | 79.228 | 11              | 255 | 79215.392  | 15905174  |
| 2                  | 524.499         | 67.576 | 0               | 255 | 35443.651  | 7116514   |
| <b>PICTURE B</b>   | Area            | Mean   | Min             | Max | IntDen     | RawIntDen |
| 1                  | 1326.899        | 92.435 | 19              | 255 | 122651.425 | 24626430  |
| 2                  | 726.149         | 88.726 | 0               | 255 | 64428.407  | 12936186  |
| <b>PICTURE C</b>   | Area            | Mean   | Min             | Max | IntDen     | RawIntDen |
| 1                  | 1143.299        | 41.211 | 5               | 255 | 47116.191  | 9460172   |
| 2                  | 559.298         | 35.769 | 0               | 225 | 20005.295  | 4016741   |
| <b>PICTURE D</b>   | Area            | Mean   | Min             | Max | IntDen     | RawIntDen |
| 1                  | 2663.854        | 99.166 | 23              | 255 | 264164.23  | 53039921  |
| 2                  | 1405.78         | 93.762 | 0               | 255 | 131809.013 | 26465126  |
|                    |                 |        |                 |     |            |           |
| <b>PICTURE 1A</b>  | Area            | Mean   | Min             | Max | IntDen     | RawIntDen |
| 1                  | 1036.597        | 68.076 | 12              | 255 | 70567.839  | 14168885  |
| 2                  | 383.935         | 45.143 | 0               | 255 | 17332.133  | 3480013   |
| <b>PICTURE 1B</b>  | Area            | Mean   | Min             | Max | IntDen     | RawIntDen |
| 1                  | 2079.43         | 68.675 | 6               | 255 | 142805.488 | 28673041  |
| 2                  | 1030.202        | 51.181 | 0               | 255 | 52726.816  | 10586695  |
| <b>PICTURE 25A</b> | Area            | Mean   | Min             | Max | IntDen     | RawIntDen |
| 1                  | 1452.821        | 48.51  | 5               | 255 | 70476.786  | 14150603  |
| 2                  | 618.297         | 30.208 | 0               | 227 | 18677.594  | 3750160   |
| <b>PICTURE 25B</b> | Area            | Mean   | Min             | Max | IntDen     | RawIntDen |
| 1                  | 890.415         | 47.93  | 6               | 255 | 42677.438  | 8568942   |
| 2                  | 405.471         | 31.289 | 1               | 255 | 12686.904  | 2547326   |

**Figure S22.** Plot profile determination (Image J software).

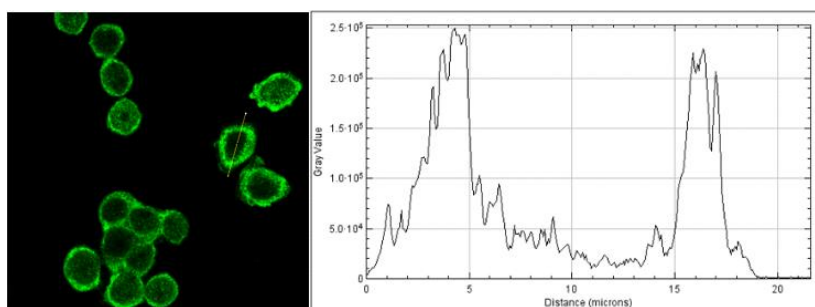

**Figure S23.** DMSO treatment.

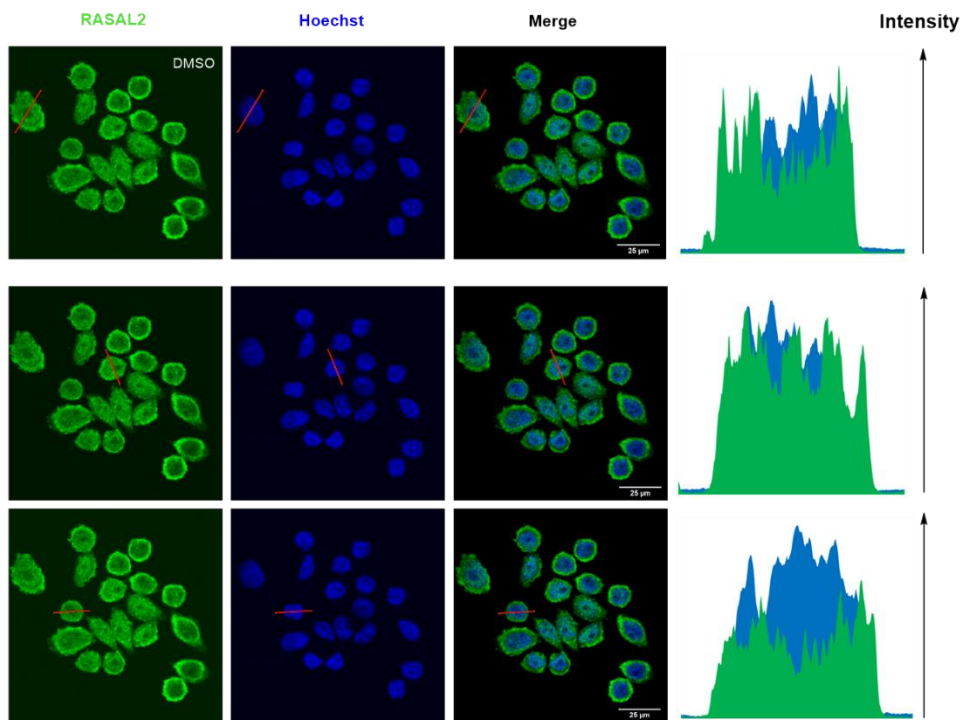

**Figure S24.** Goyazensolide 1 μM treatment.

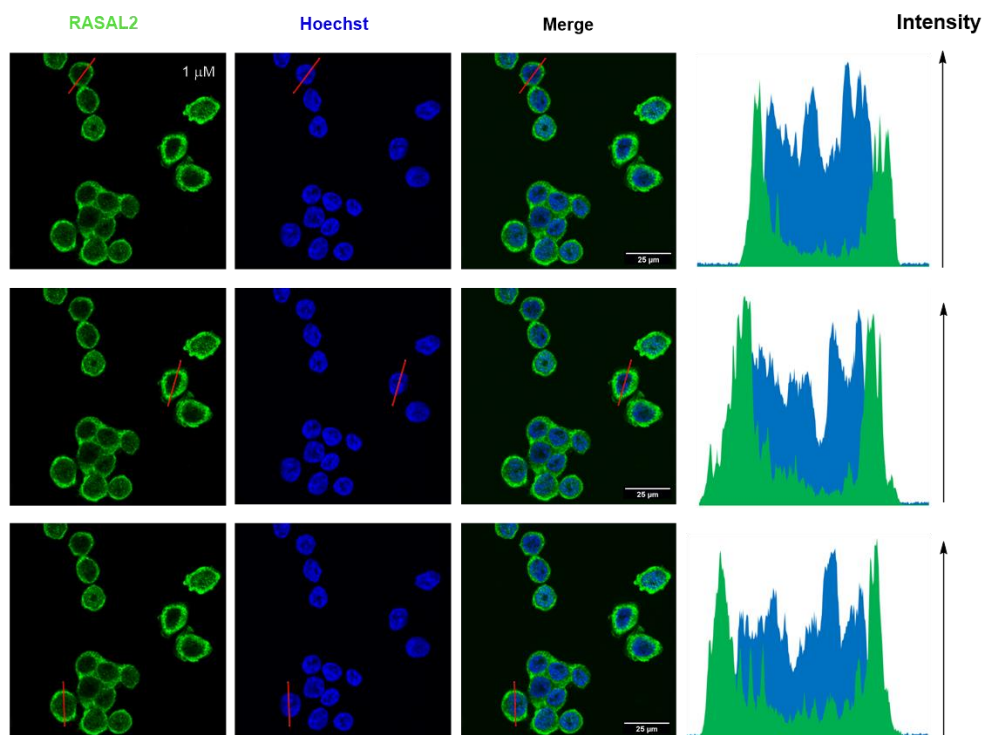



**Figure S25.** Goyazensolide 2.5  $\mu\text{M}$  treatment.

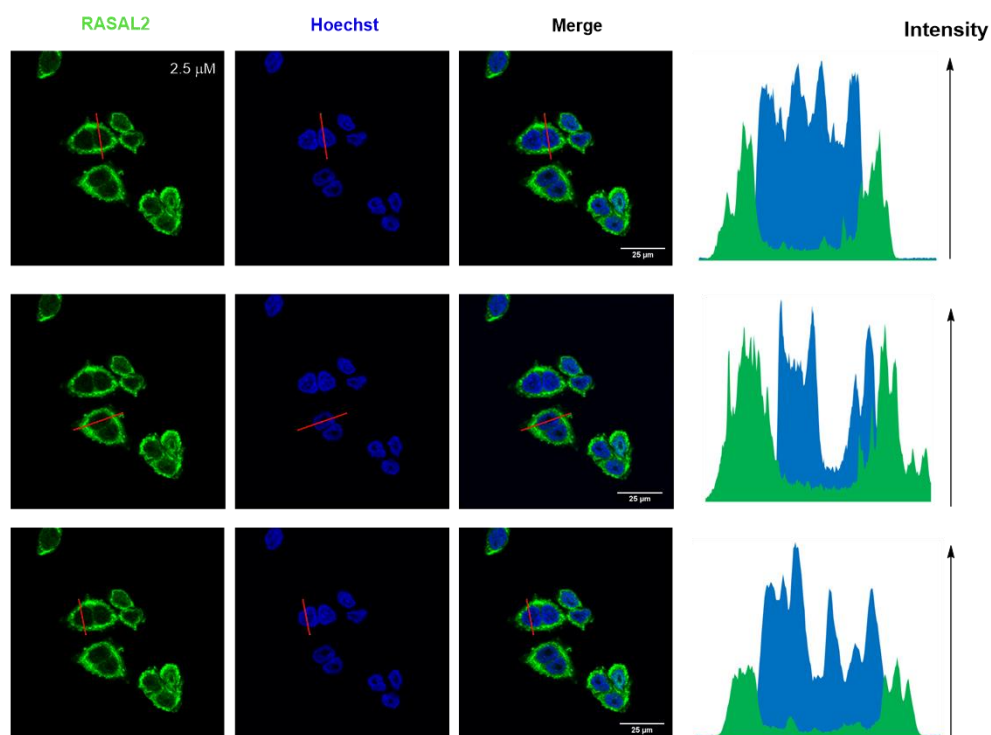

**Table S21.** Standard deviation (STDEV) and Standard error of mean (SEM)

| Ratio       | Ratio                                            | Ratio                                             |                           |   |                               |
|-------------|--------------------------------------------------|---------------------------------------------------|---------------------------|---|-------------------------------|
| <b>DMSO</b> | <b>Goyazensolid e 1 <math>\mu\text{M}</math></b> | <b>Goyazensolide 2.5 <math>\mu\text{M}</math></b> | <b>Standard deviation</b> |   | <b>Standard error of mean</b> |
| 1.362694    | 1.806843                                         | 2.054756                                          | 0.132056852               | 4 | 0.066028426                   |
| 1.092318    | 1.677424                                         | 1.9765                                            | 0.091513053               | 2 | 0.0647095                     |
| 1.297862    |                                                  |                                                   | 0.055335348               | 2 | 0.039128                      |
| 1.122037    |                                                  |                                                   |                           |   |                               |
| <b>DMSO</b> | <b>Goyazensolid e 1 <math>\mu\text{M}</math></b> | <b>Goyazensolide 2.5 <math>\mu\text{M}</math></b> |                           |   |                               |
| 1.218728    | 1.7421335                                        | 2.015628                                          |                           |   |                               |

### pAKT assay.

SW620 Cells were seeded (350.000 cells/mL) in a 6 well plate and left two days to attach and grow. Cells were incubated with DMSO or goyazensolide (5  $\mu\text{M}$ ) in a time dependant manner. Cells were lysed and scrapped in the presence of phosphatase inhibitors at 4 °C. Lysates were centrifuge at 14000g for 15 minutes at 4 °C. SDS-PAGE followed by western blot treated with respective antibodies (pAKT and actin).

**Full gel of Figure 4d.** Immunoblot of p-AKT (p-AKT Ser473 antibody) expression upon treatment of SW620 cells with DMSO or goyazensolide (5  $\mu$ M, 4 h).

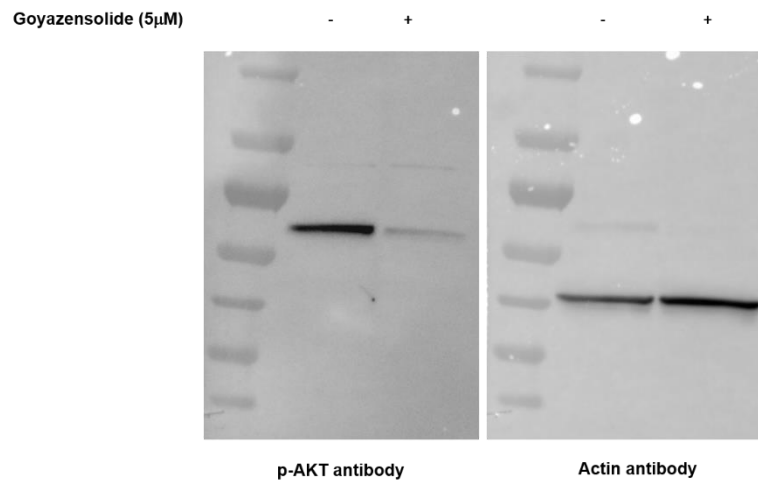

**Figure S26.** Time-/Dose-dependent manner of pAKT assay.

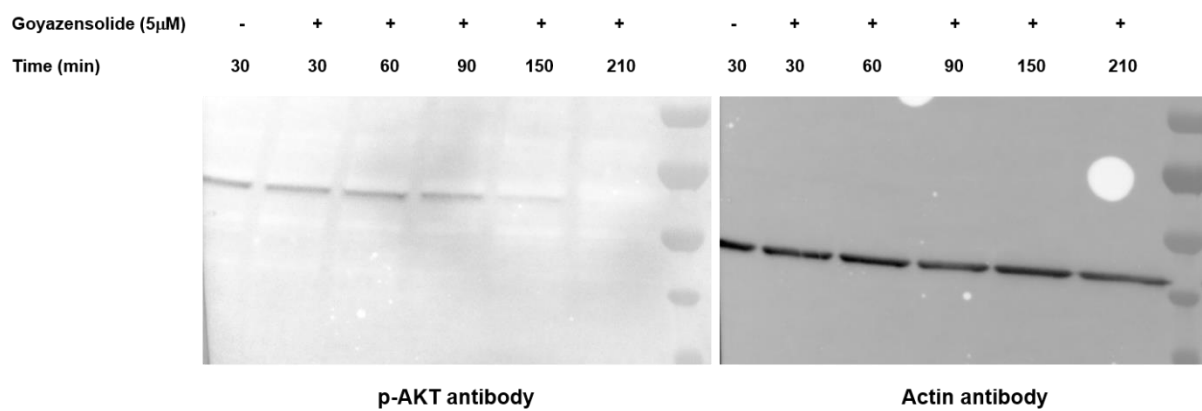

Immunoblot of p-AKT (p-AKT Ser473 antibody) expression upon treatment of SW620 cells with DMSO or goyazensolide (5  $\mu$ M, 4 h).

### k) Chiral-HPLC spectra of 20a

|       |                                                                                              |            |
|-------|----------------------------------------------------------------------------------------------|------------|
| Major | 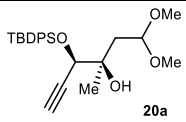<br>20a     | 12.797 min |
| Minor | <br>ent-20a | 11.048 min |

14/02/2020 18:46:56 Page

## SHIMADZU LabSolutions Analysis Report

### <Sample Information>

|                  |                                |              |                        |
|------------------|--------------------------------|--------------|------------------------|
| Sample Name      | : wll-ug-13-54-rac             | Sample Type  | : Unknown              |
| Sample ID        | :                              | Acquired by  | : System Administrator |
| Data Filename    | : wll-ug-13-54-rac-AD-9901.lcd | Processed by | : System Administrator |
| Method Filename  | : Aqu Col1 99-1 1mL 40 MIN.lcm |              |                        |
| Batch Filename   | : new template.lcb             |              |                        |
| Vial #           | : 1-91                         |              |                        |
| Injection Volume | : 10 uL                        |              |                        |
| Date Acquired    | : 14/02/2020 15:43:44          |              |                        |
| Date Processed   | : 14/02/2020 16:23:46          |              |                        |

### <Chromatogram>

mAU

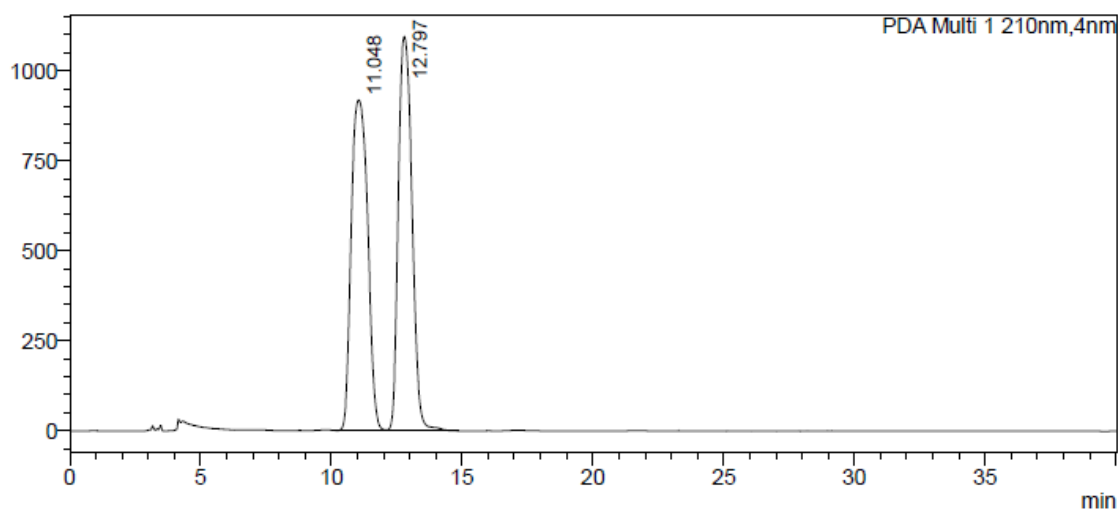

### <Peak Table>

PDA Ch1 210nm

| Peak# | Ret. Time | Area%   |
|-------|-----------|---------|
| 1     | 11.048    | 50.182  |
| 2     | 12.797    | 49.818  |
| Total |           | 100.000 |

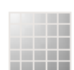

SHIMADZU

LabSolutions

# Analysis Report

## <Sample Information>

Sample Name : wl-ug-13-54-chiral  
 Sample ID :  
 Data Filename : wl-ug-13-54-chiral-AD-9901.lcd  
 Method Filename : Aqu Col1 99-1 1mL 40 MIN.lcm  
 Batch Filename : new template.lcb  
 Vial # : 1-92  
 Injection Volume : 10 uL  
 Date Acquired : 14/02/2020 16:24:16  
 Date Processed : 14/02/2020 17:04:17

Sample Type : Unknown  
 Acquired by : System Administrator  
 Processed by : System Administrator

## <Chromatogram>

mAU

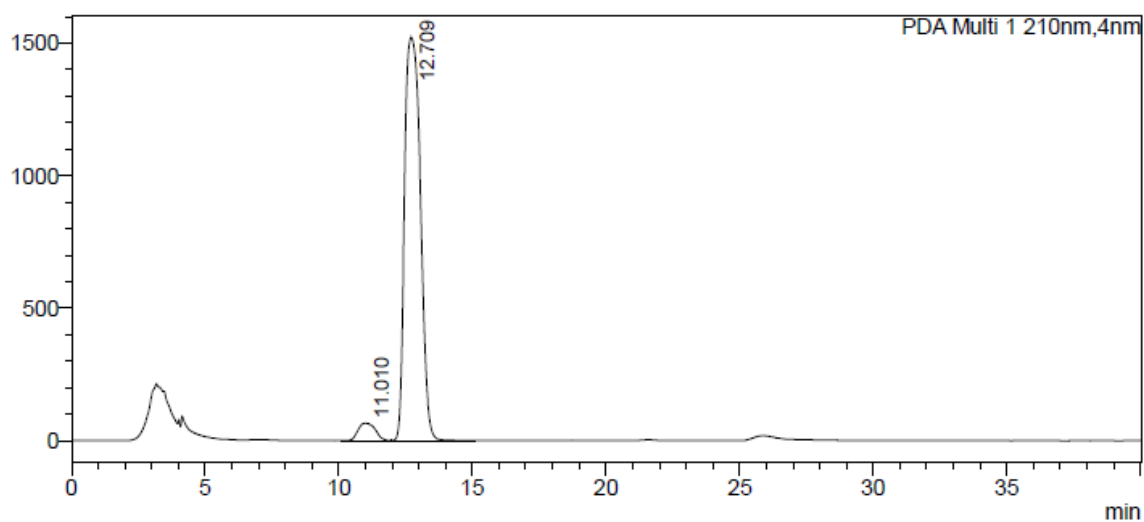

## <Peak Table>

PDA Ch1 210nm

| Peak# | Ret. Time | Area%   |
|-------|-----------|---------|
| 1     | 11.010    | 4.429   |
| 2     | 12.709    | 95.571  |
| Total |           | 100.000 |

# I) <sup>1</sup>H and <sup>13</sup>C NMR spectra

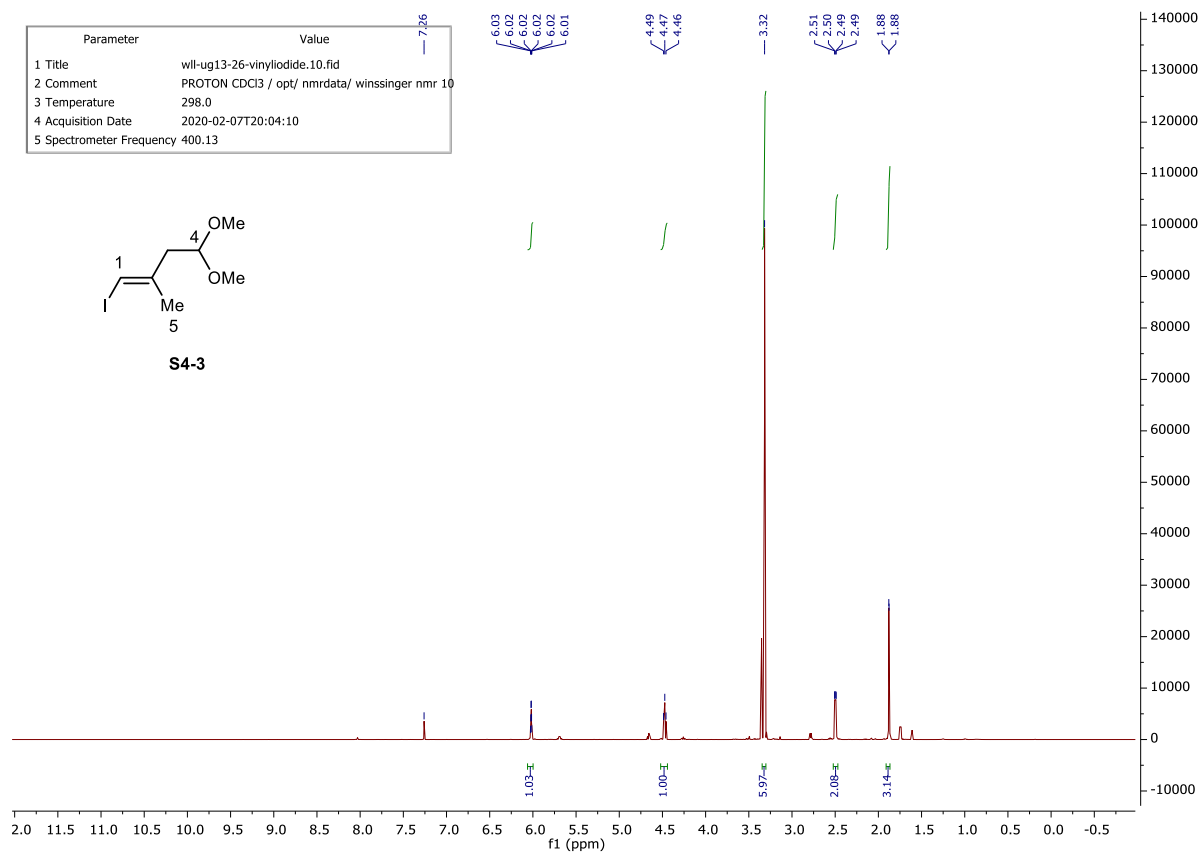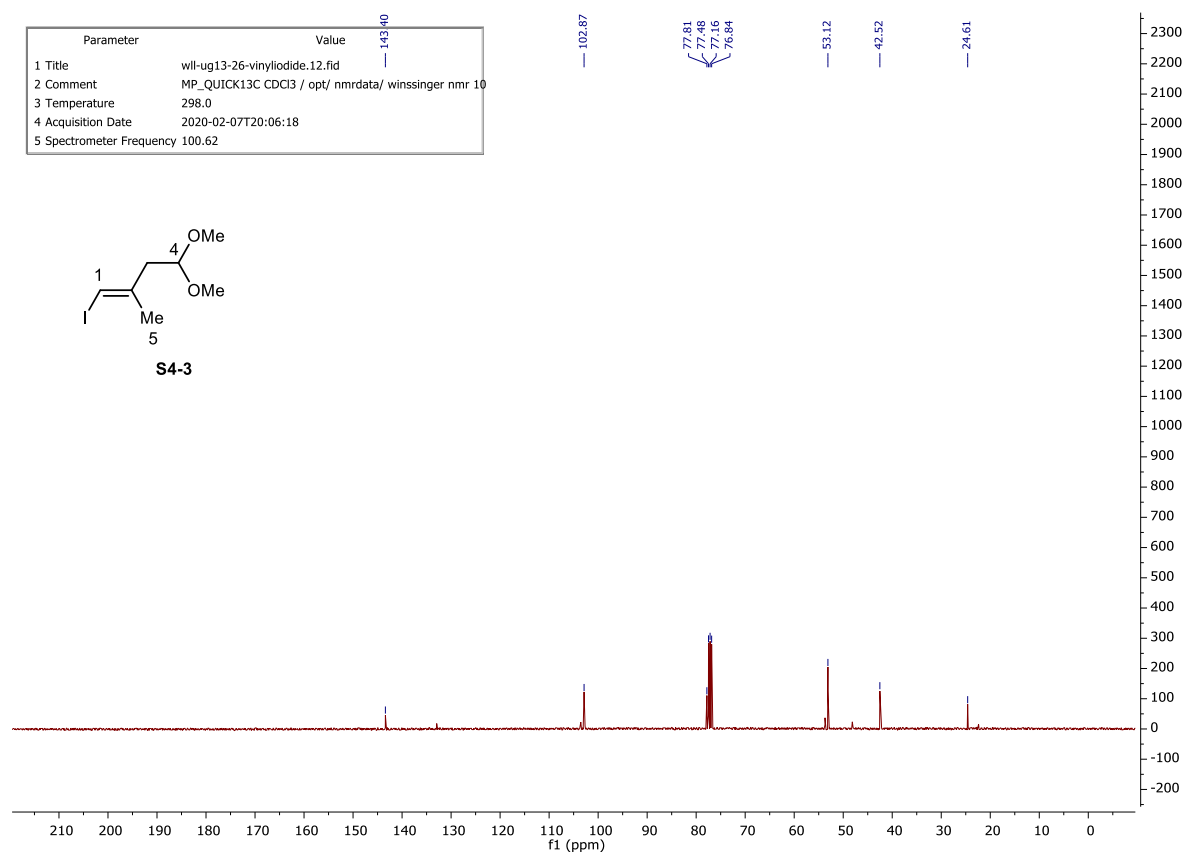

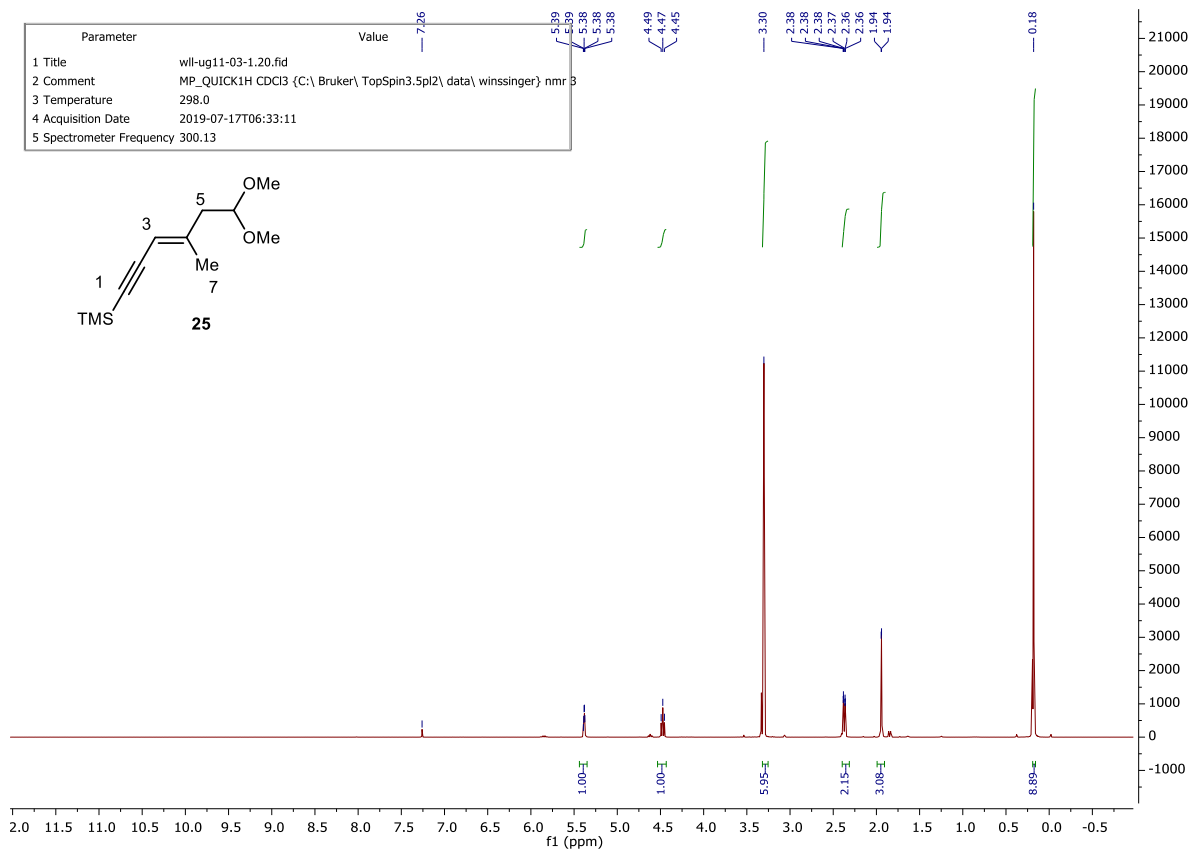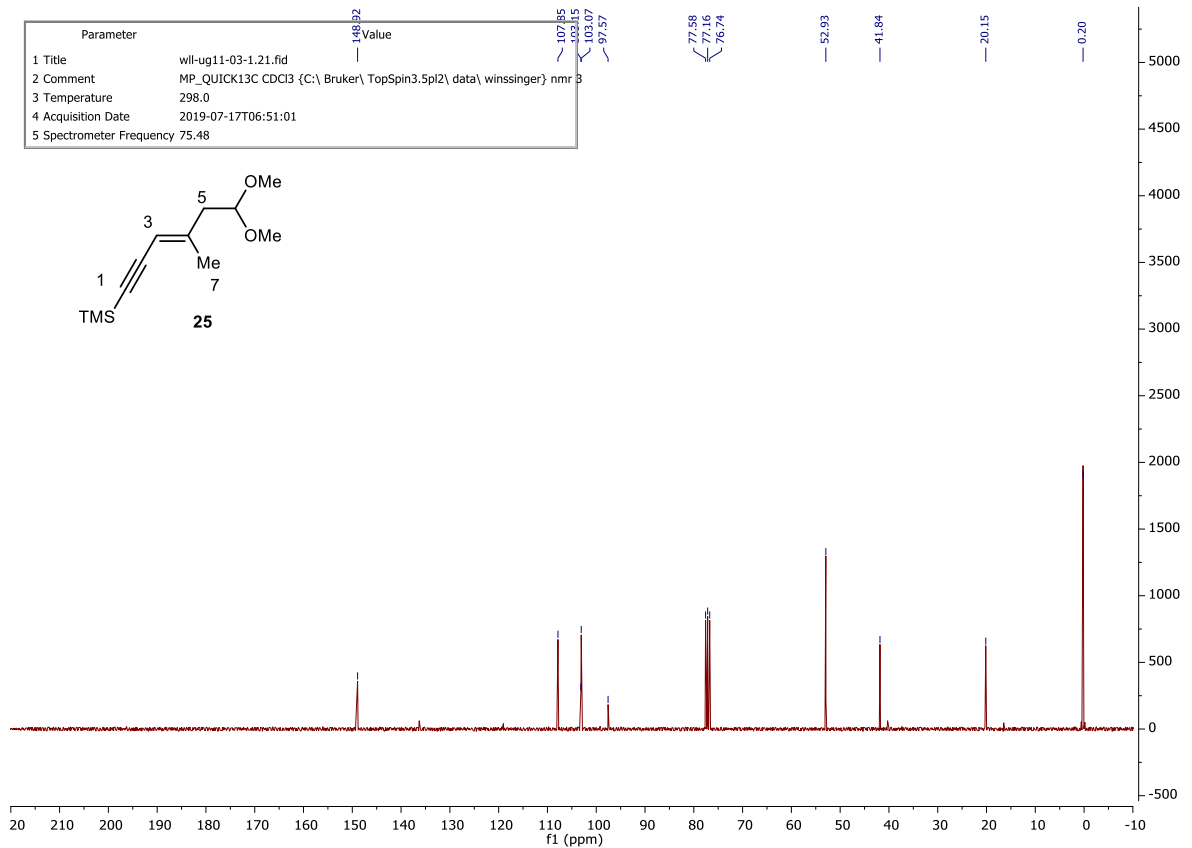

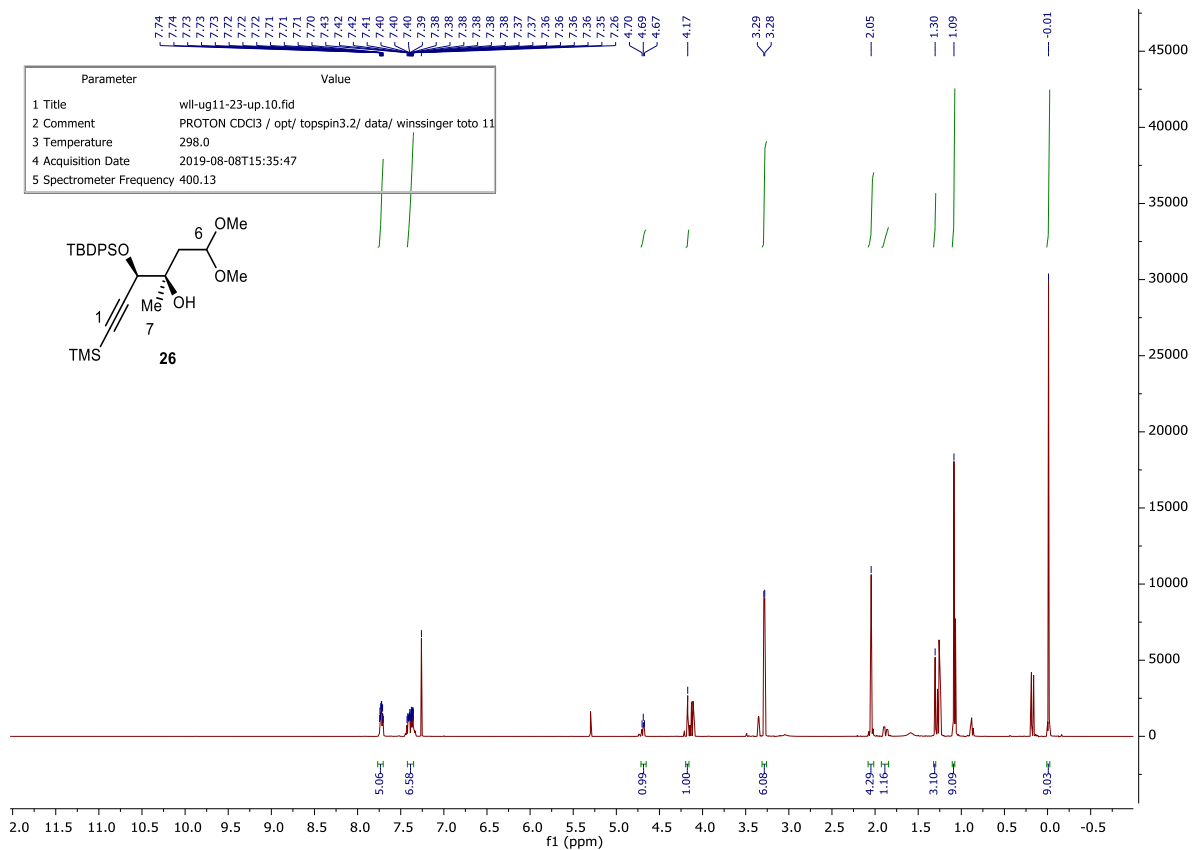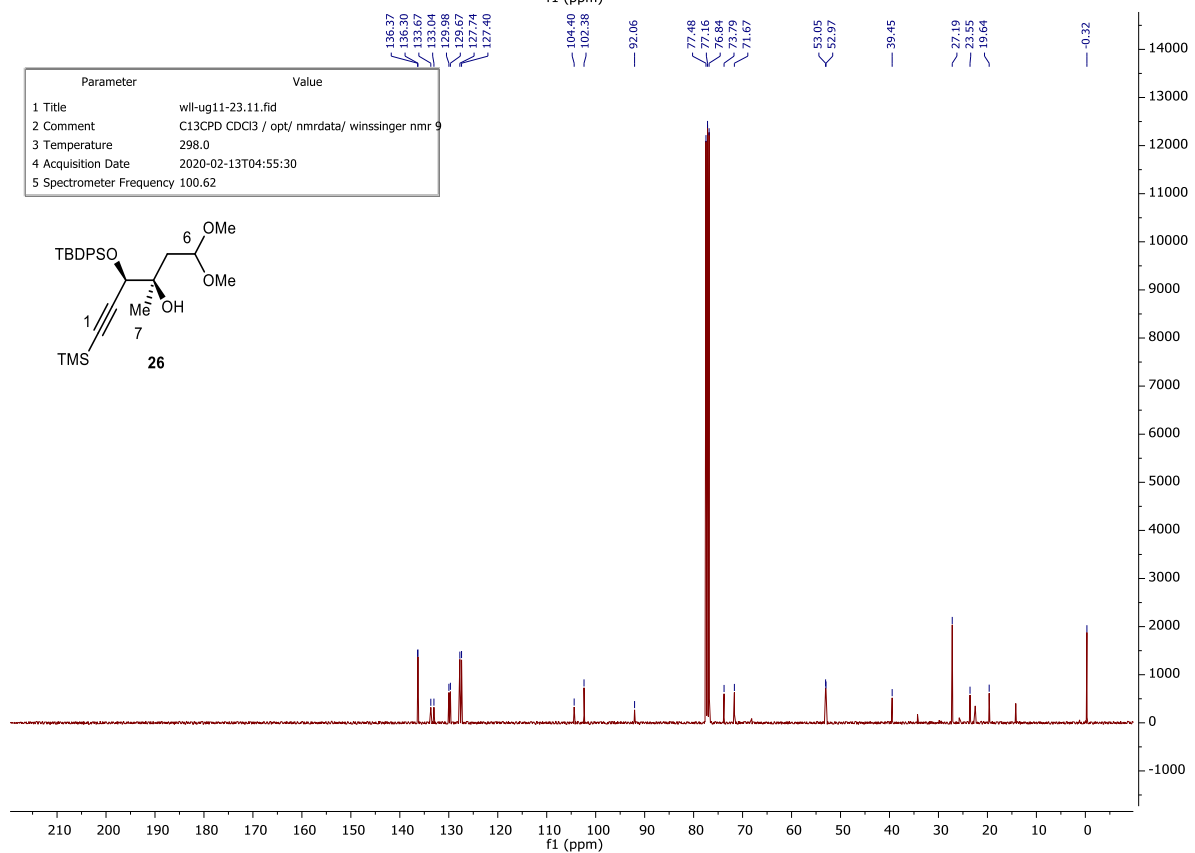

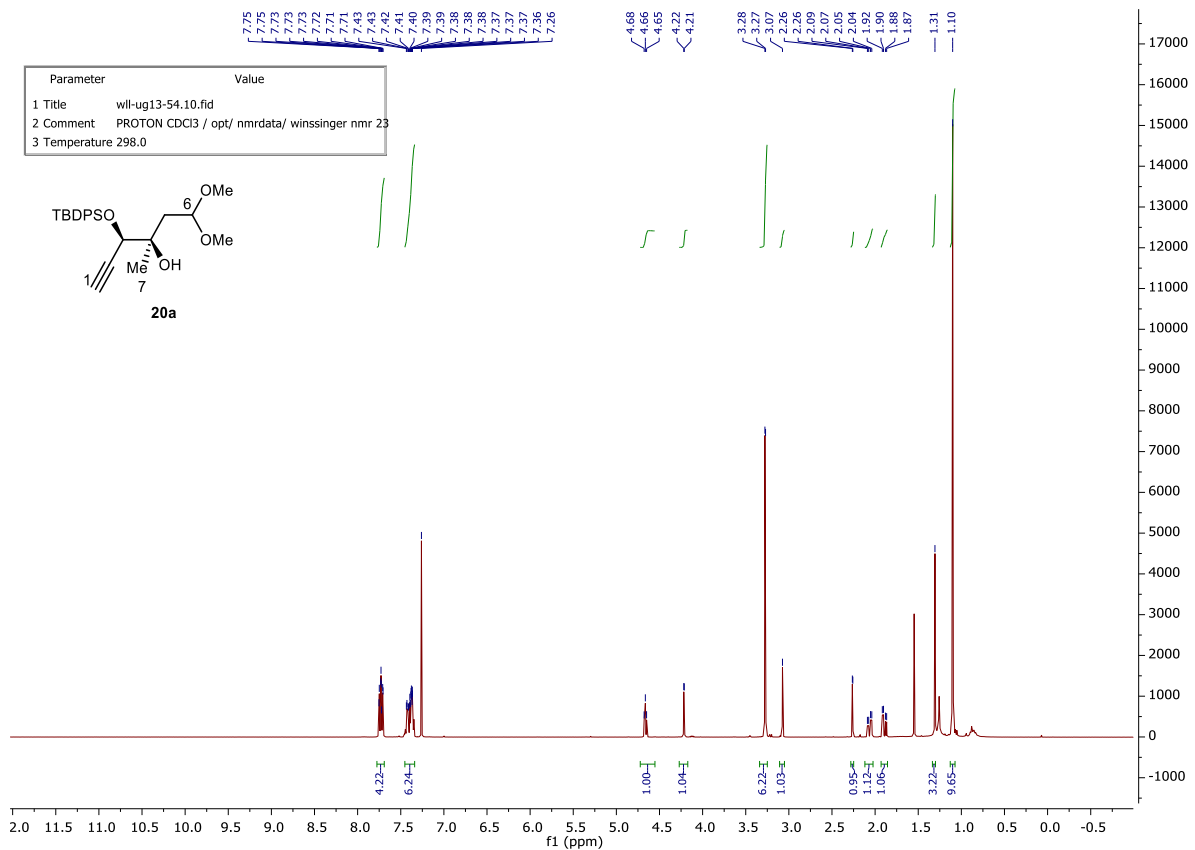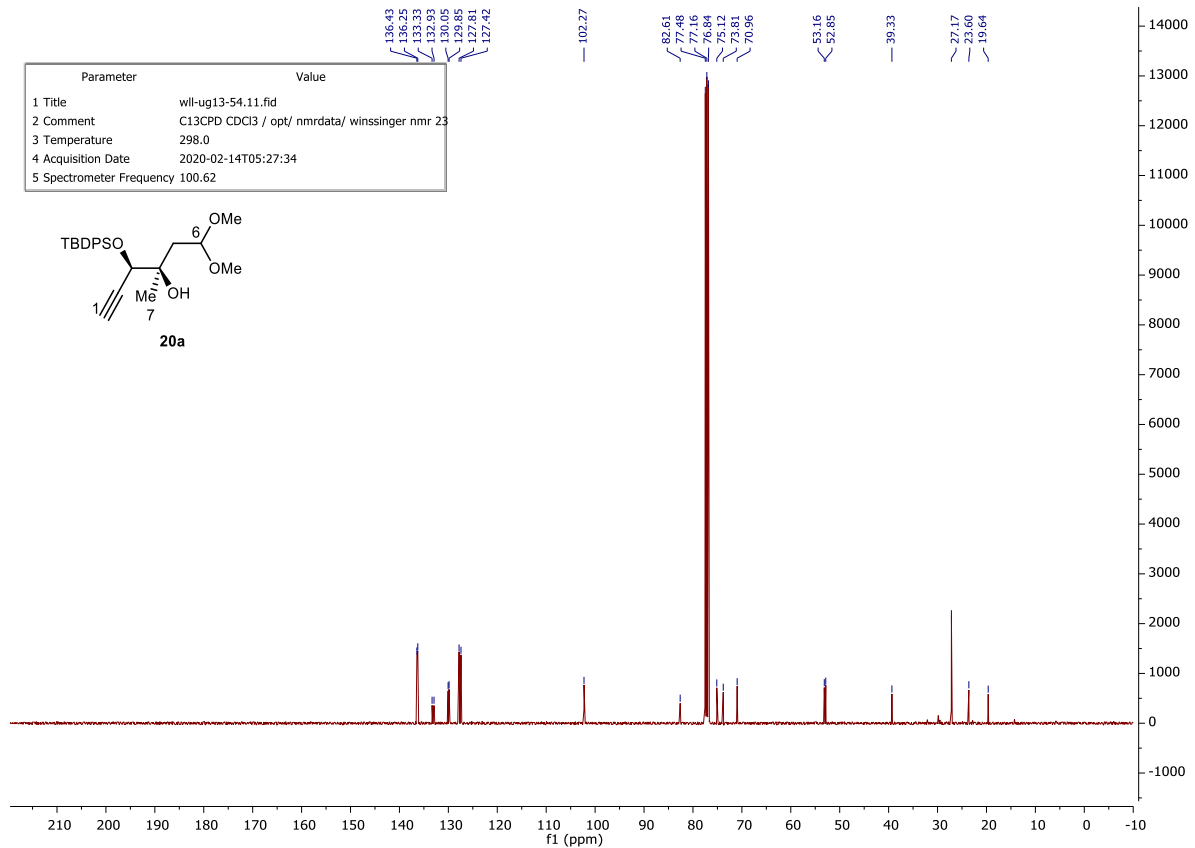



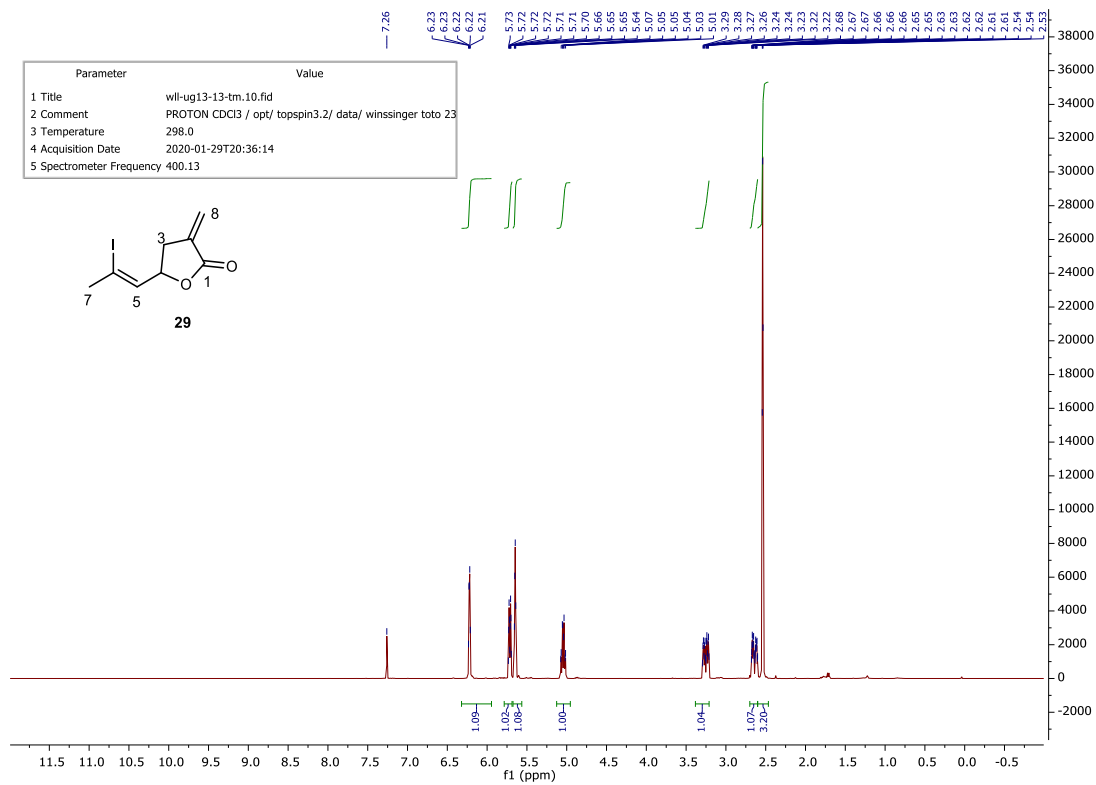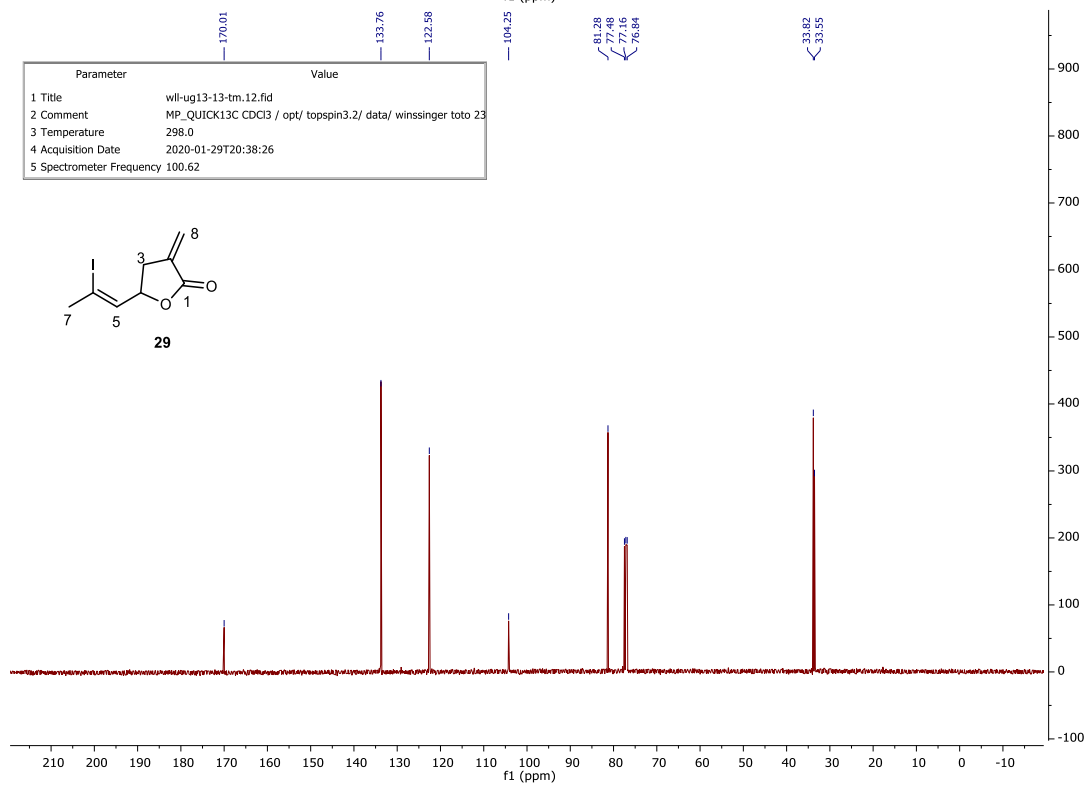

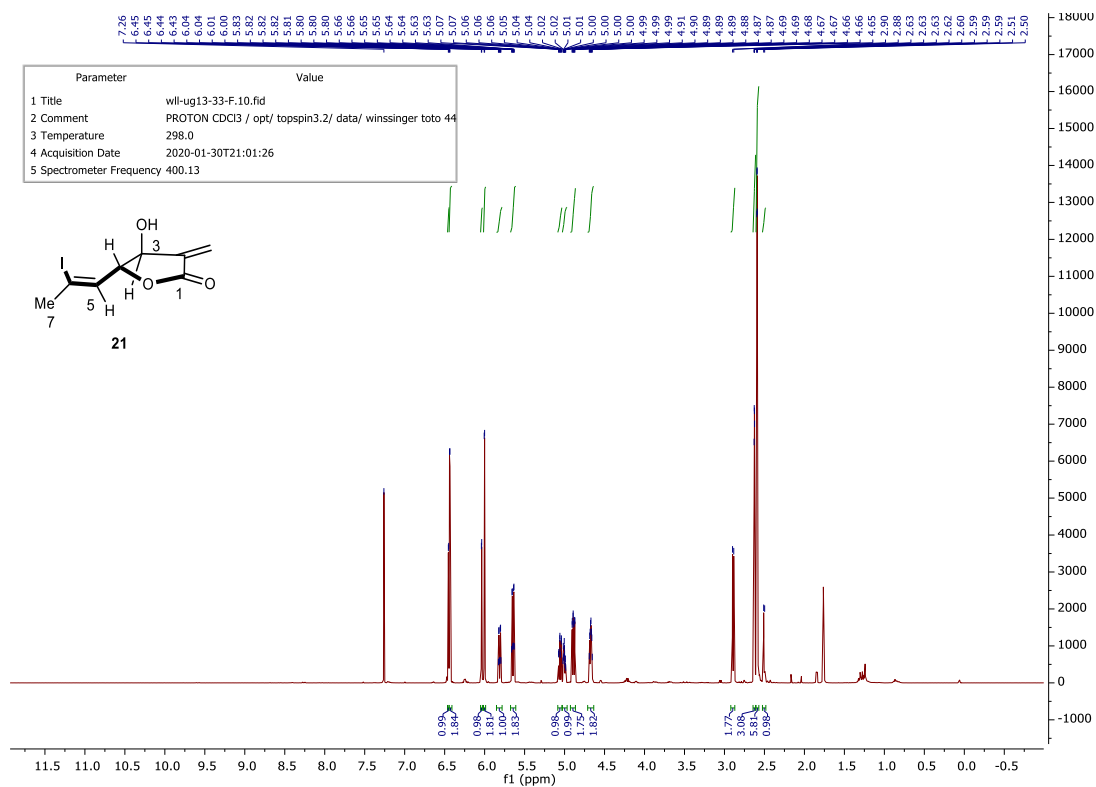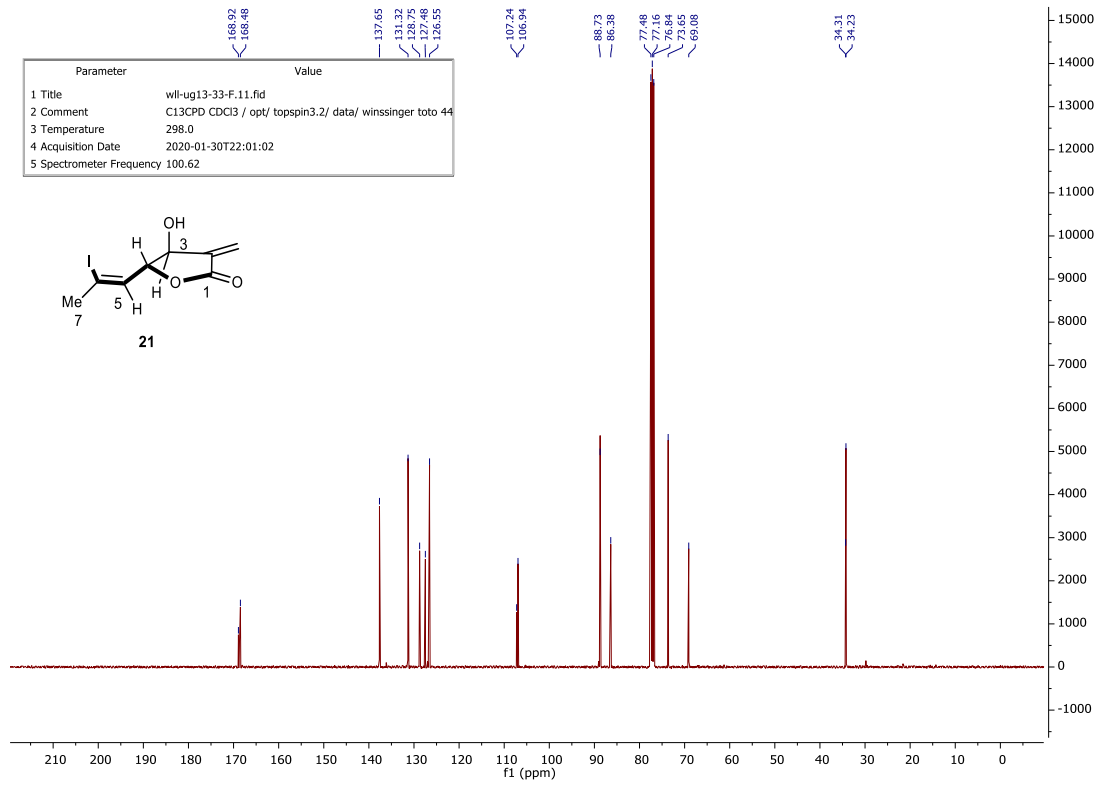

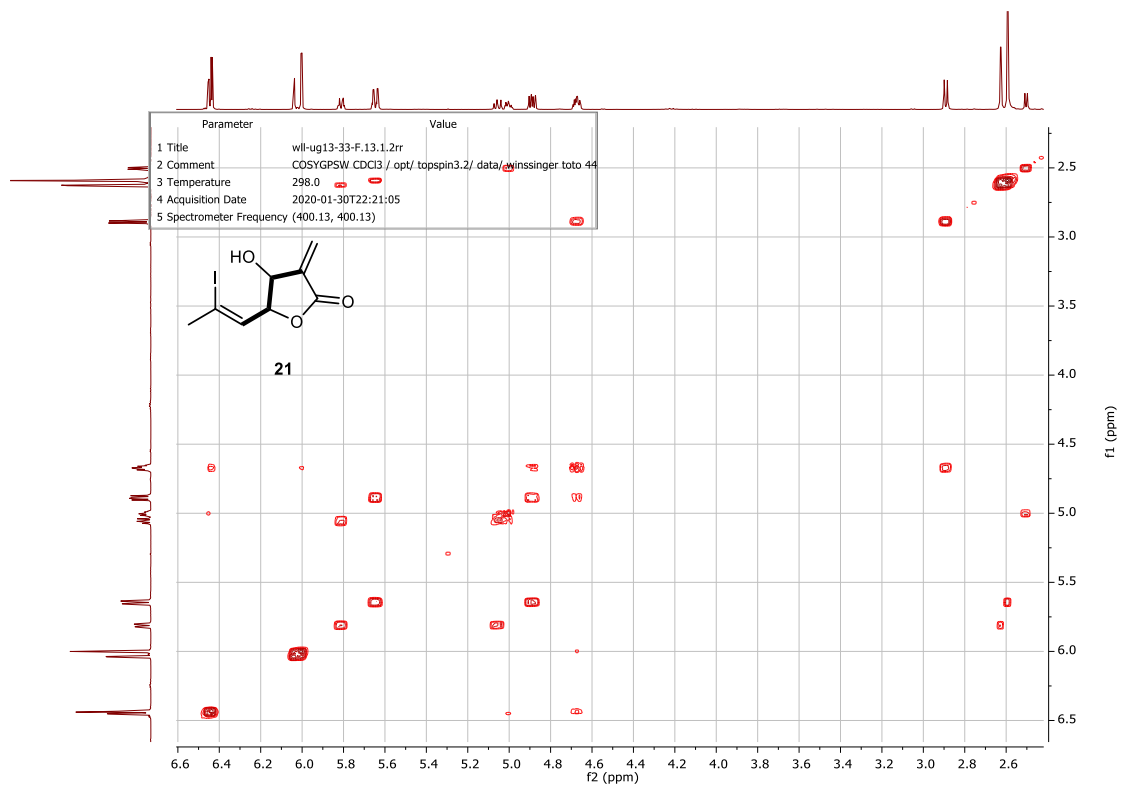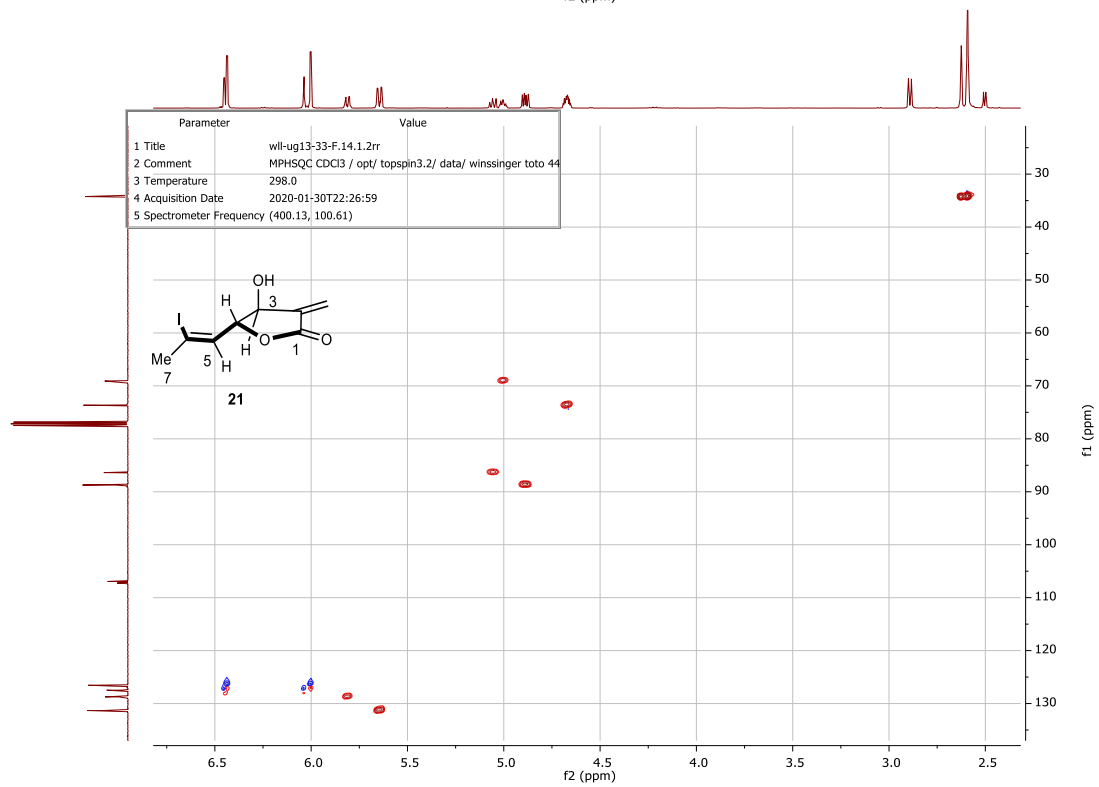

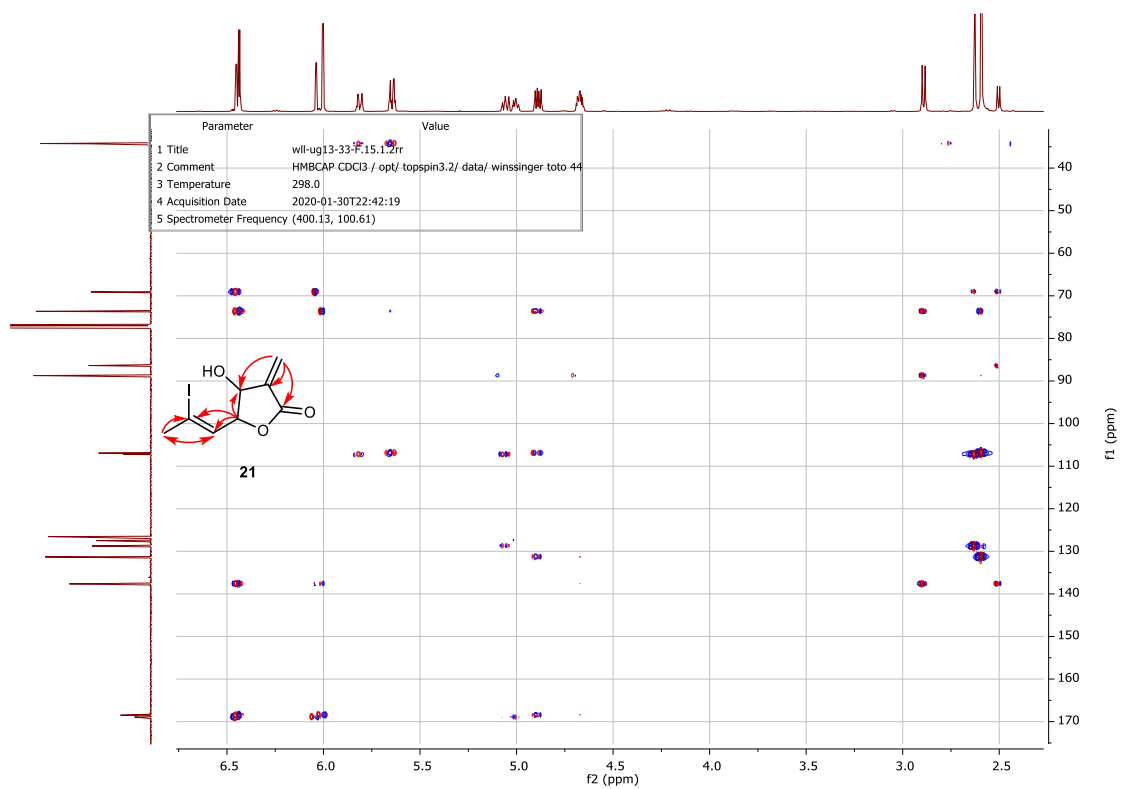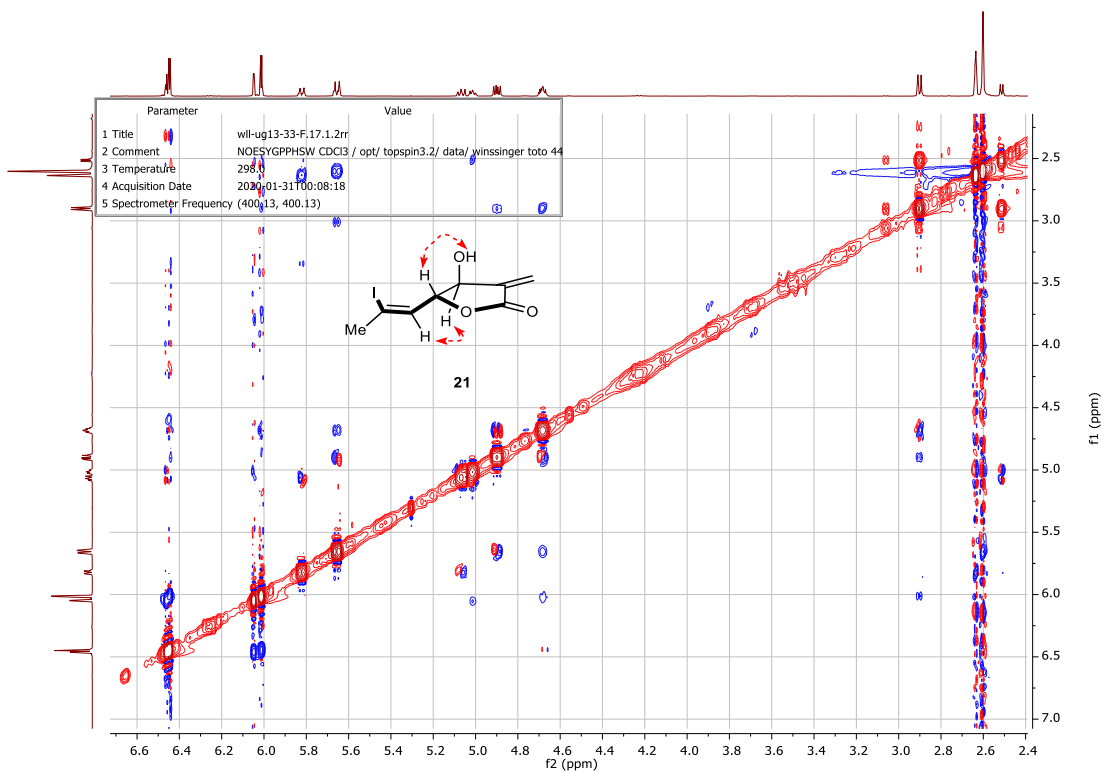

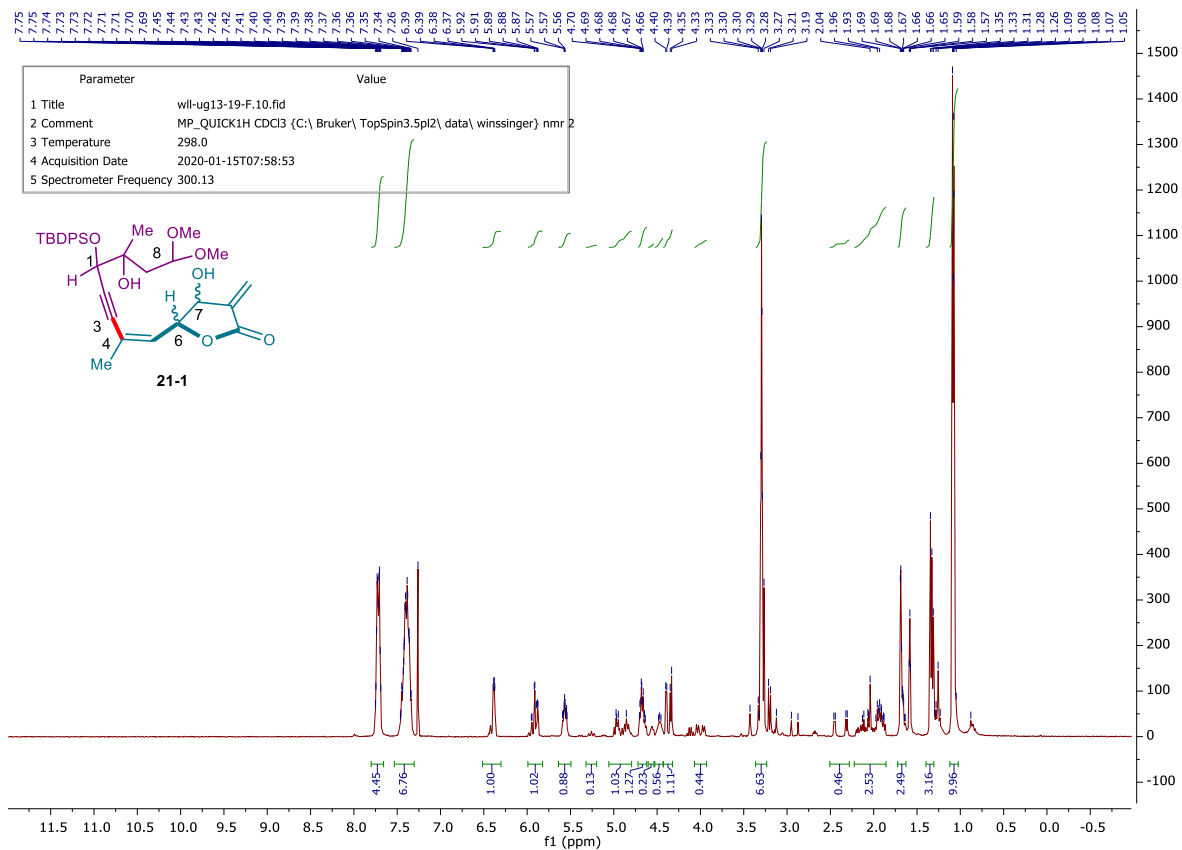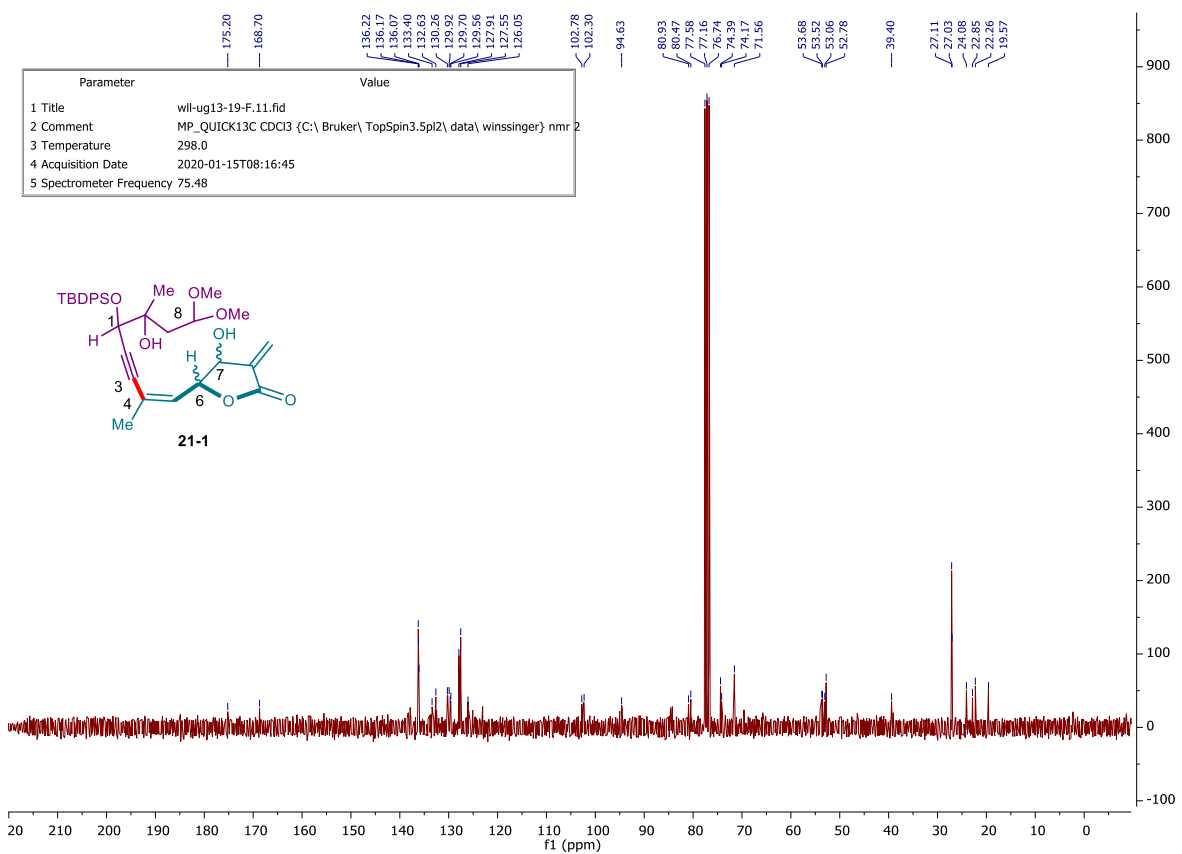



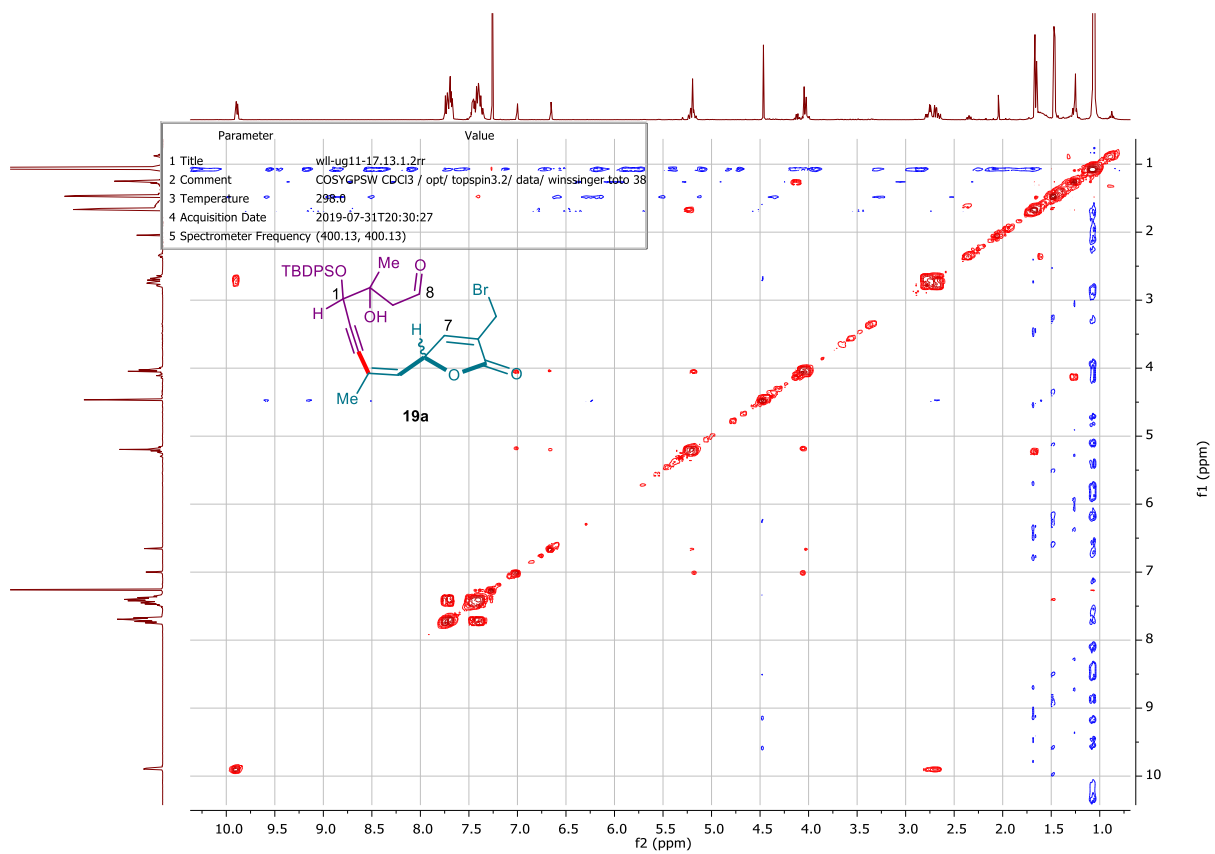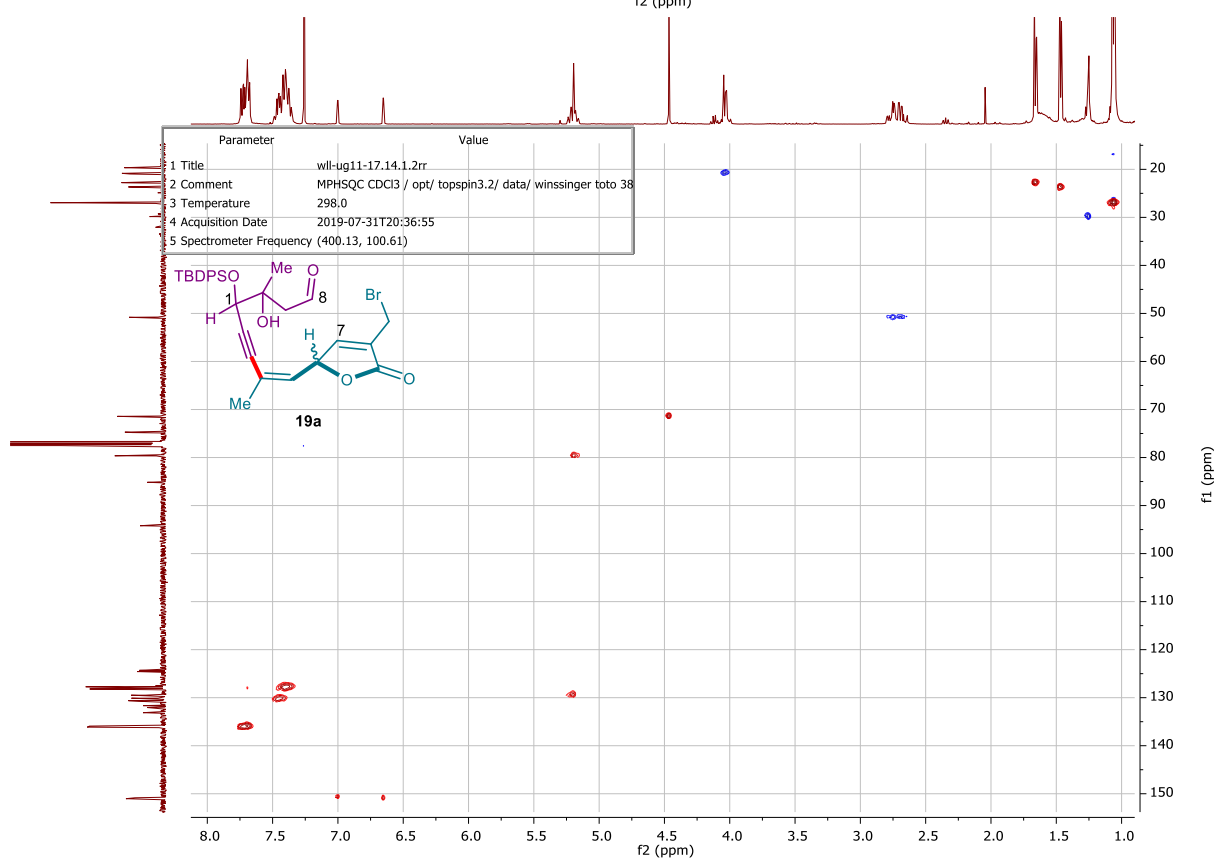

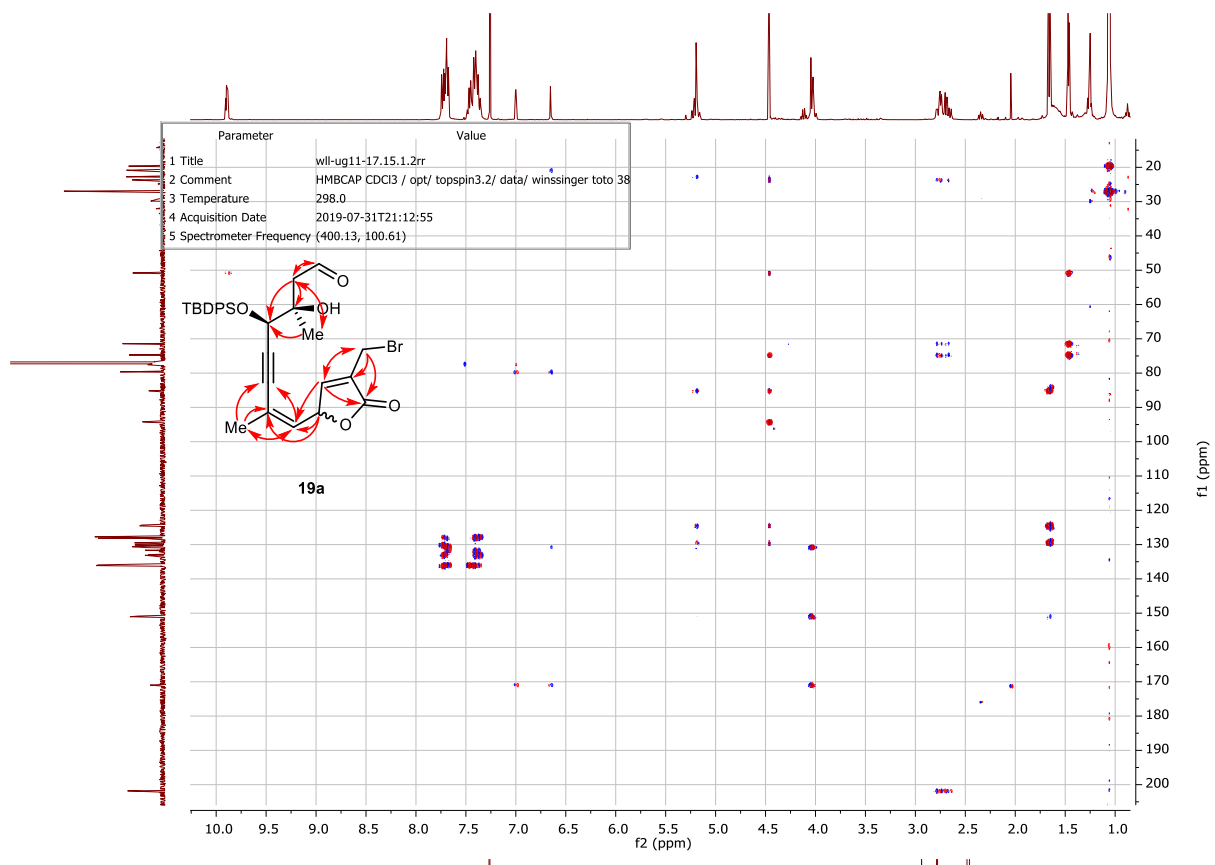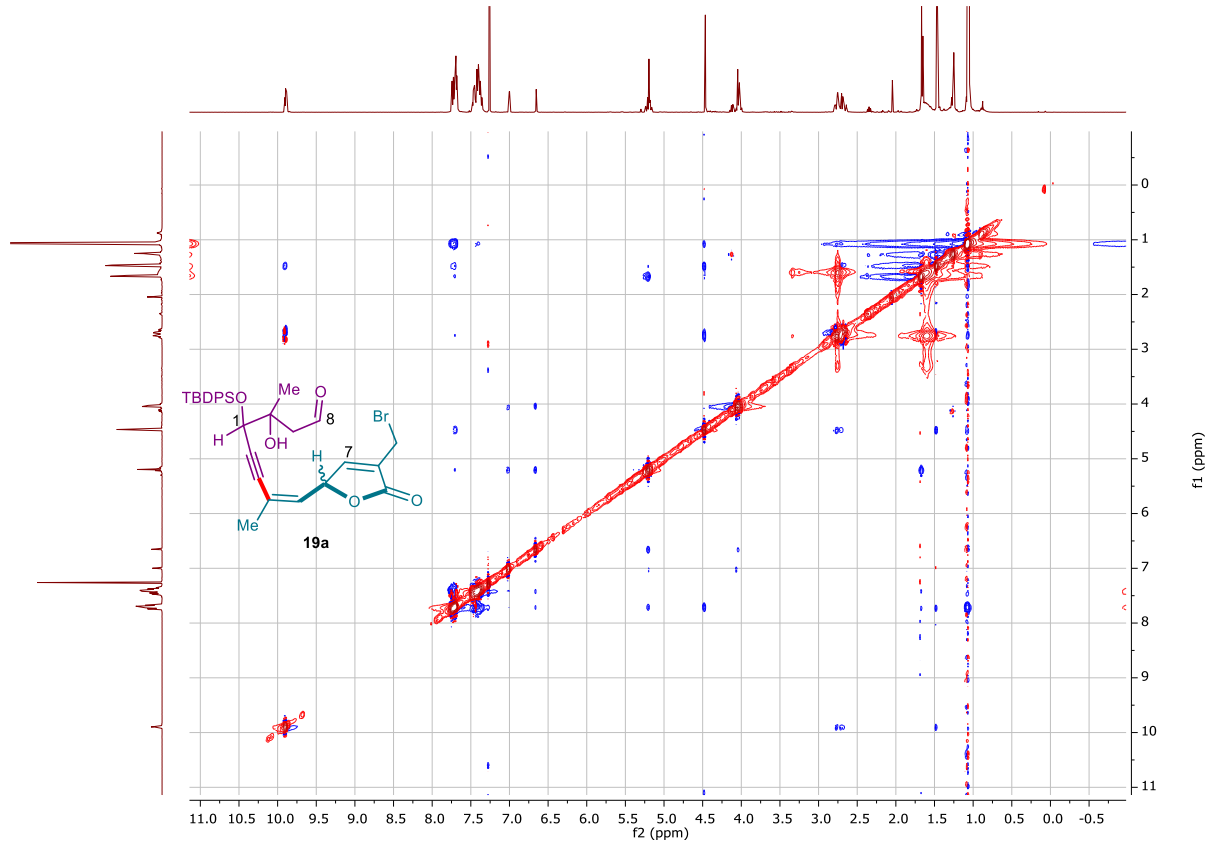



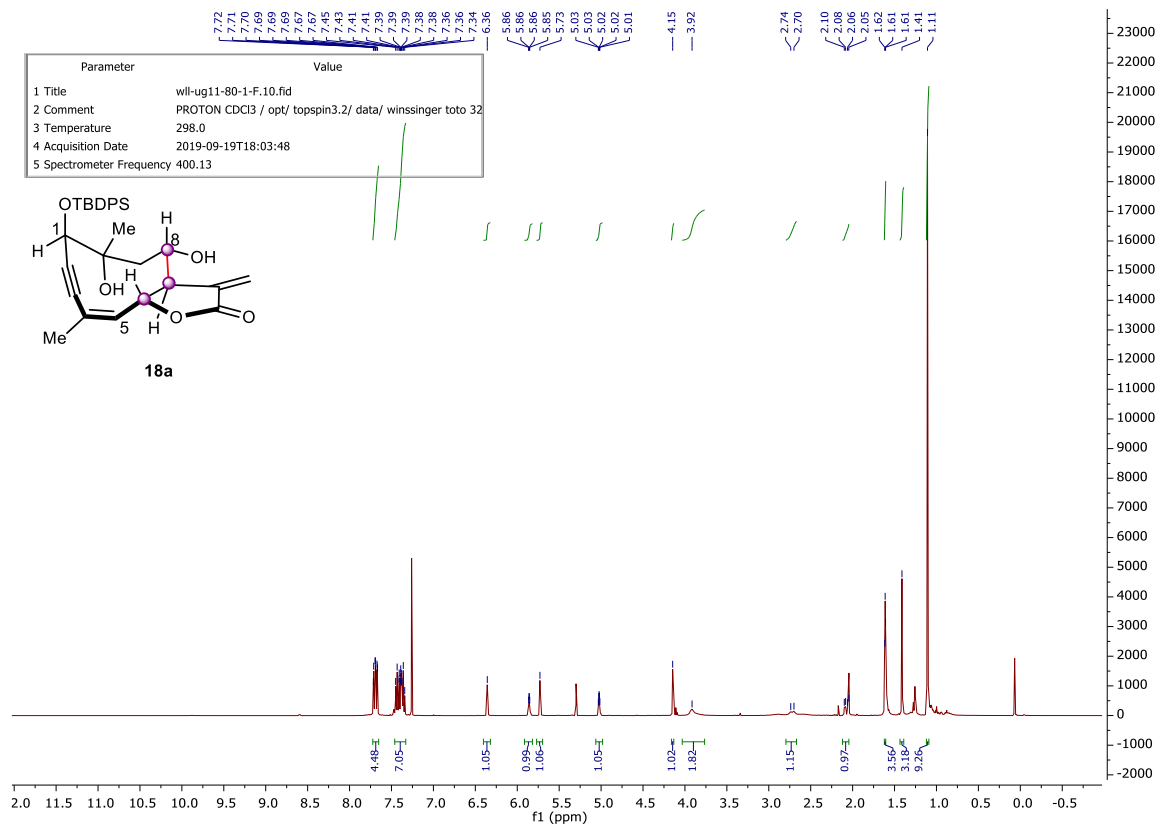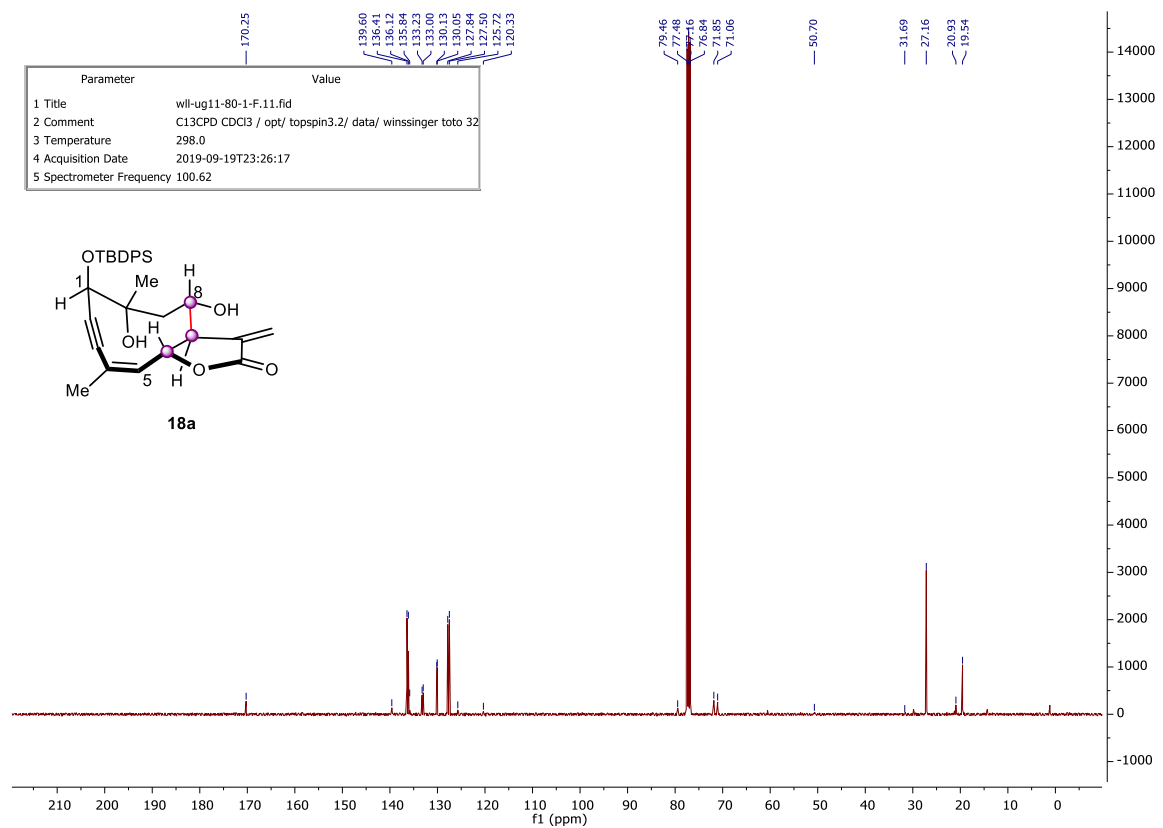

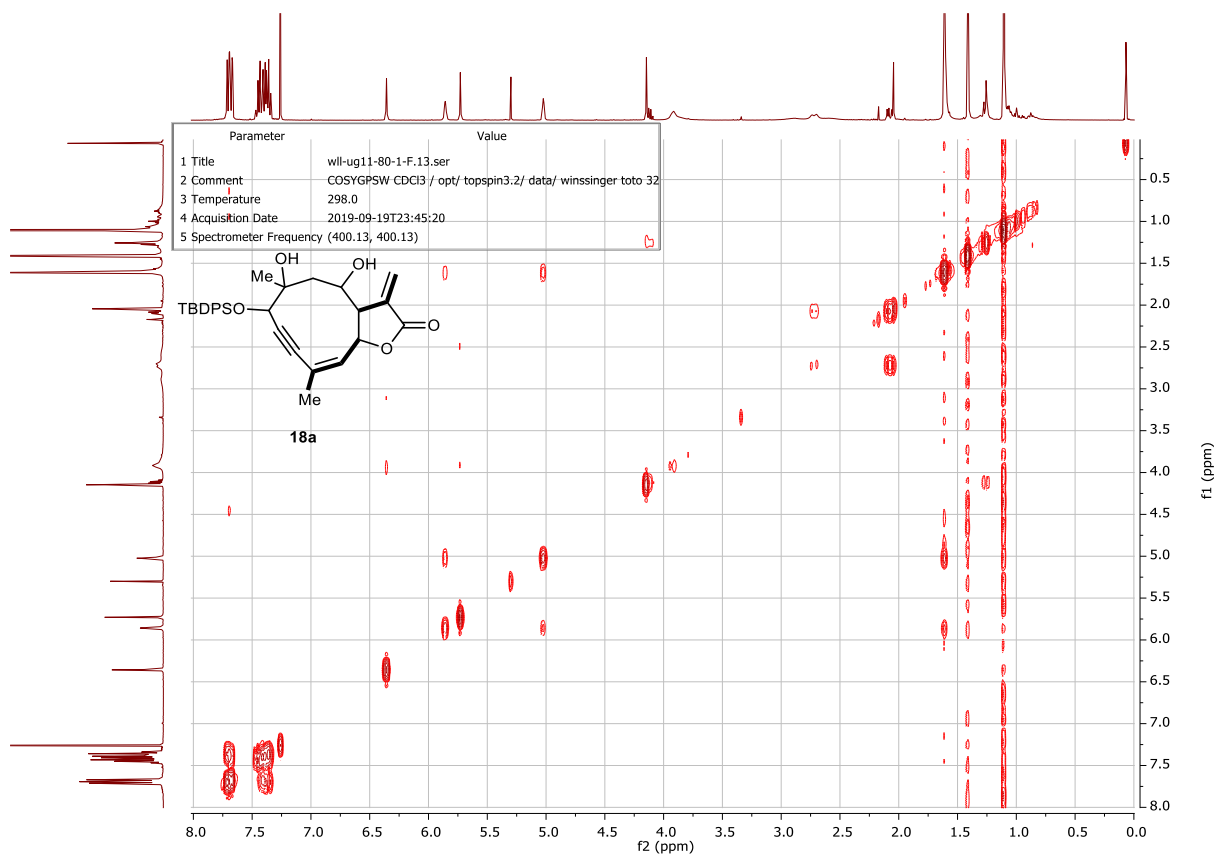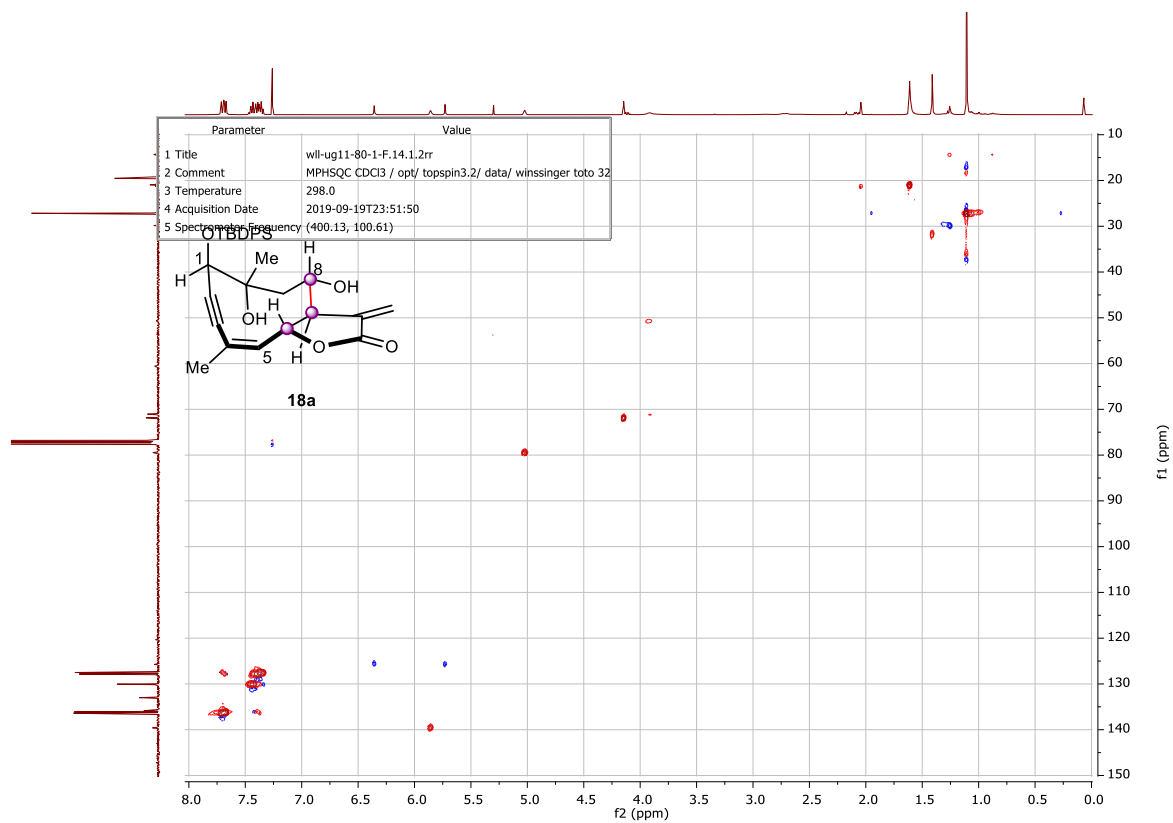

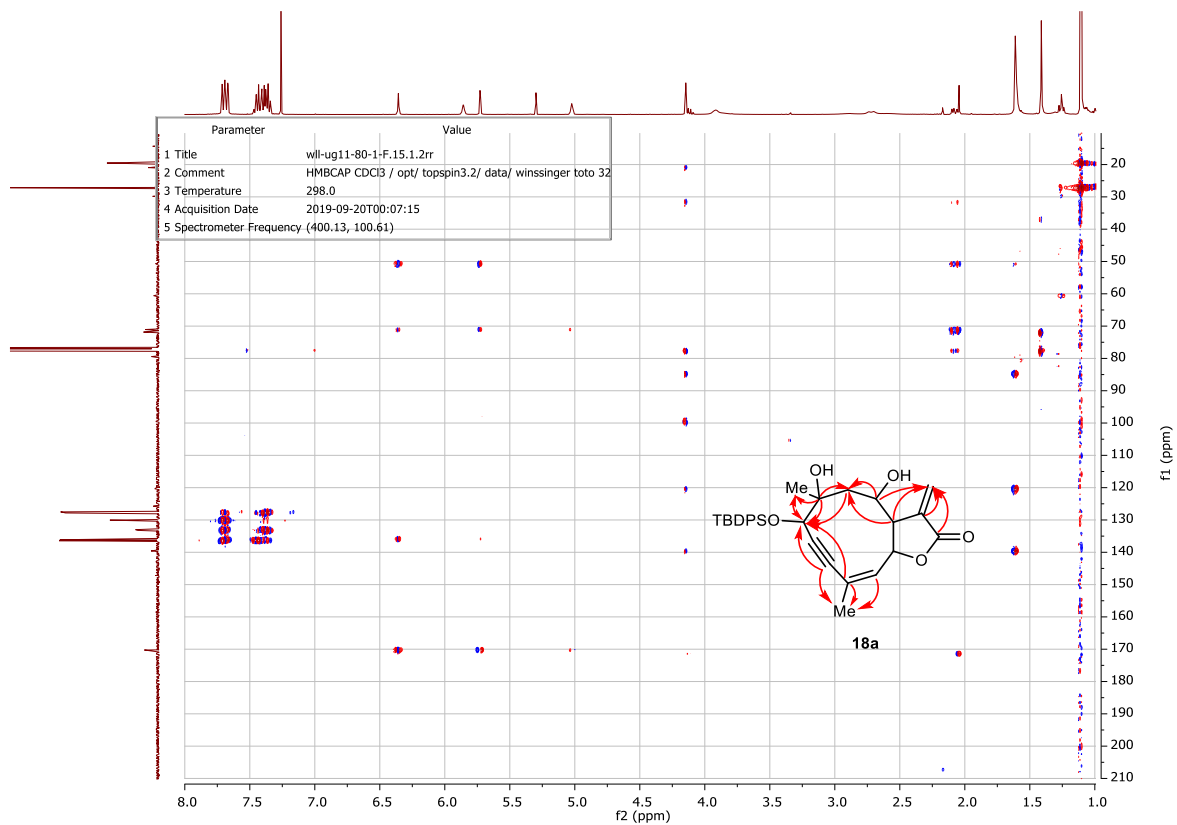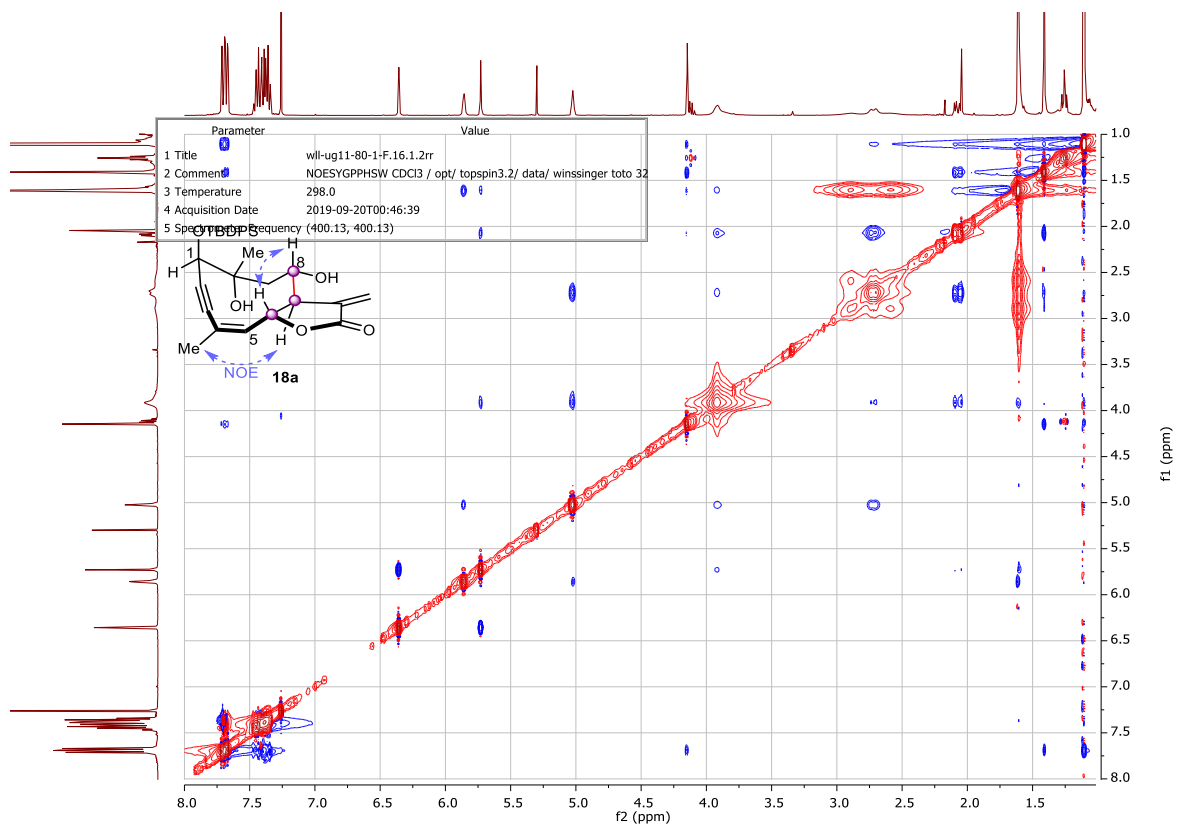

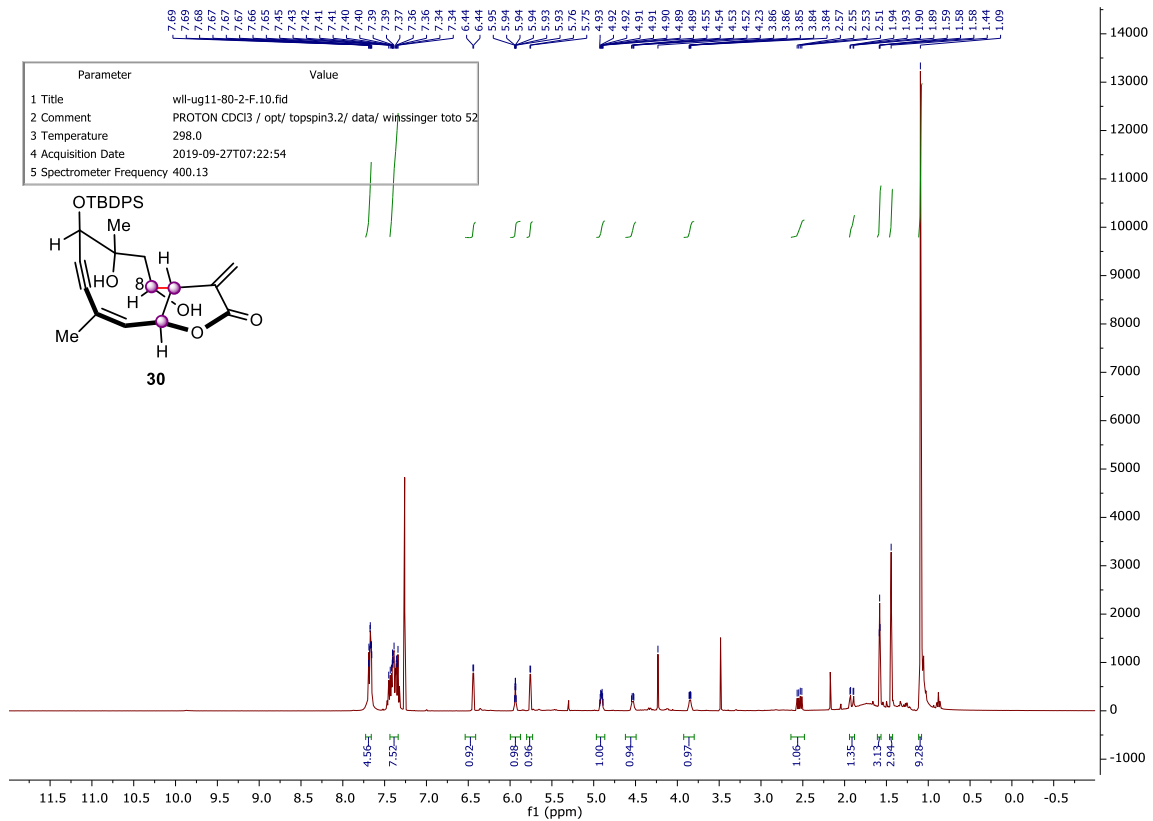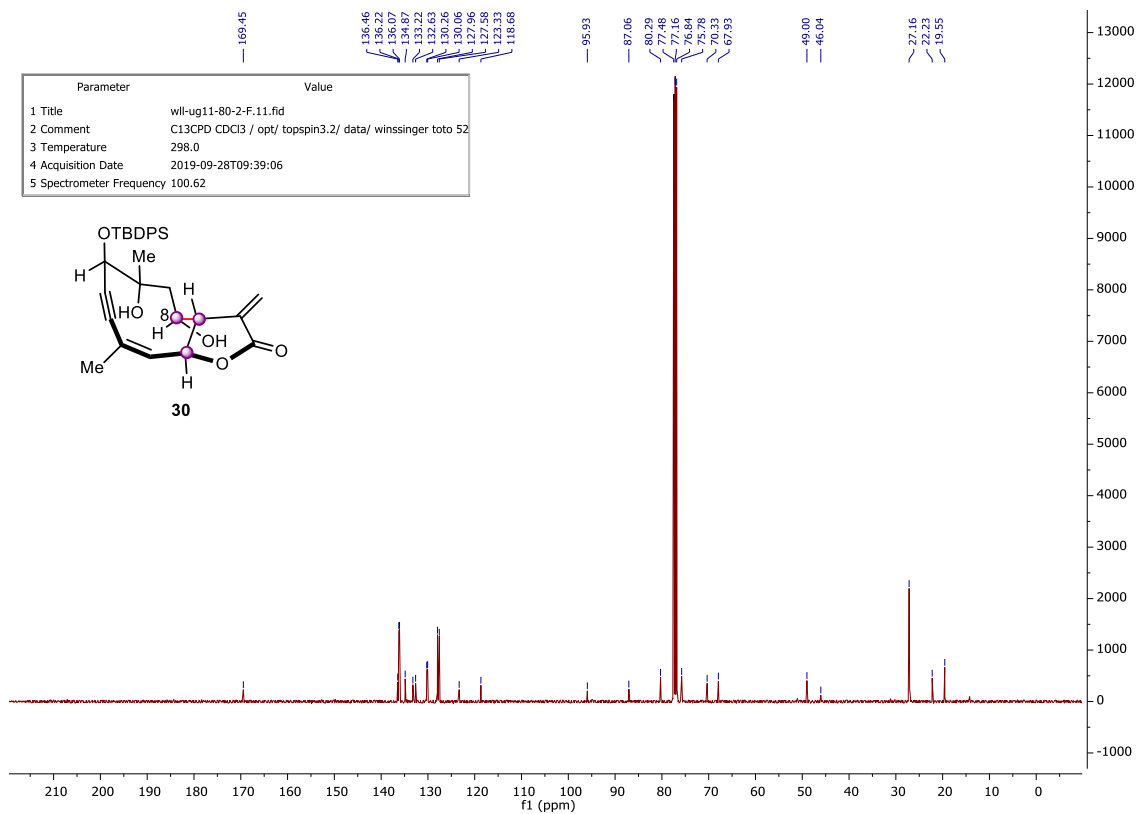

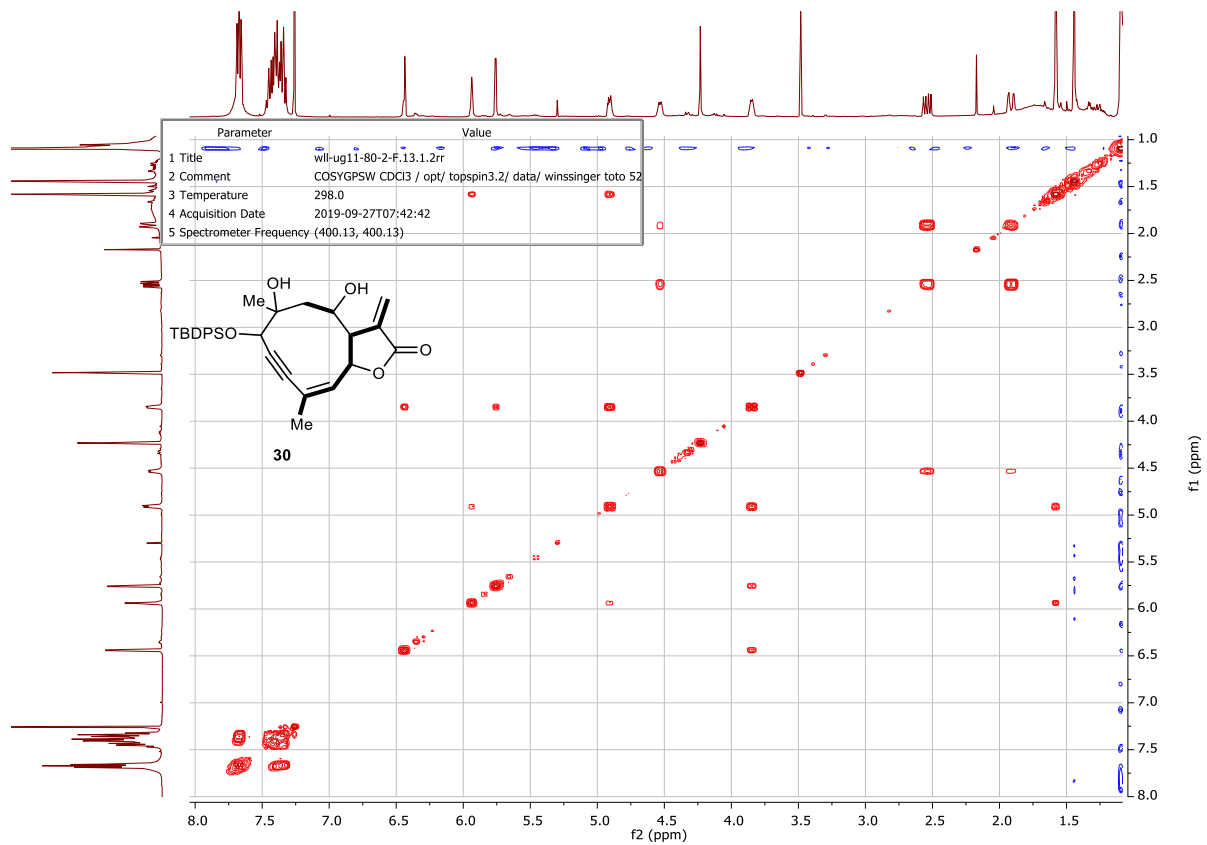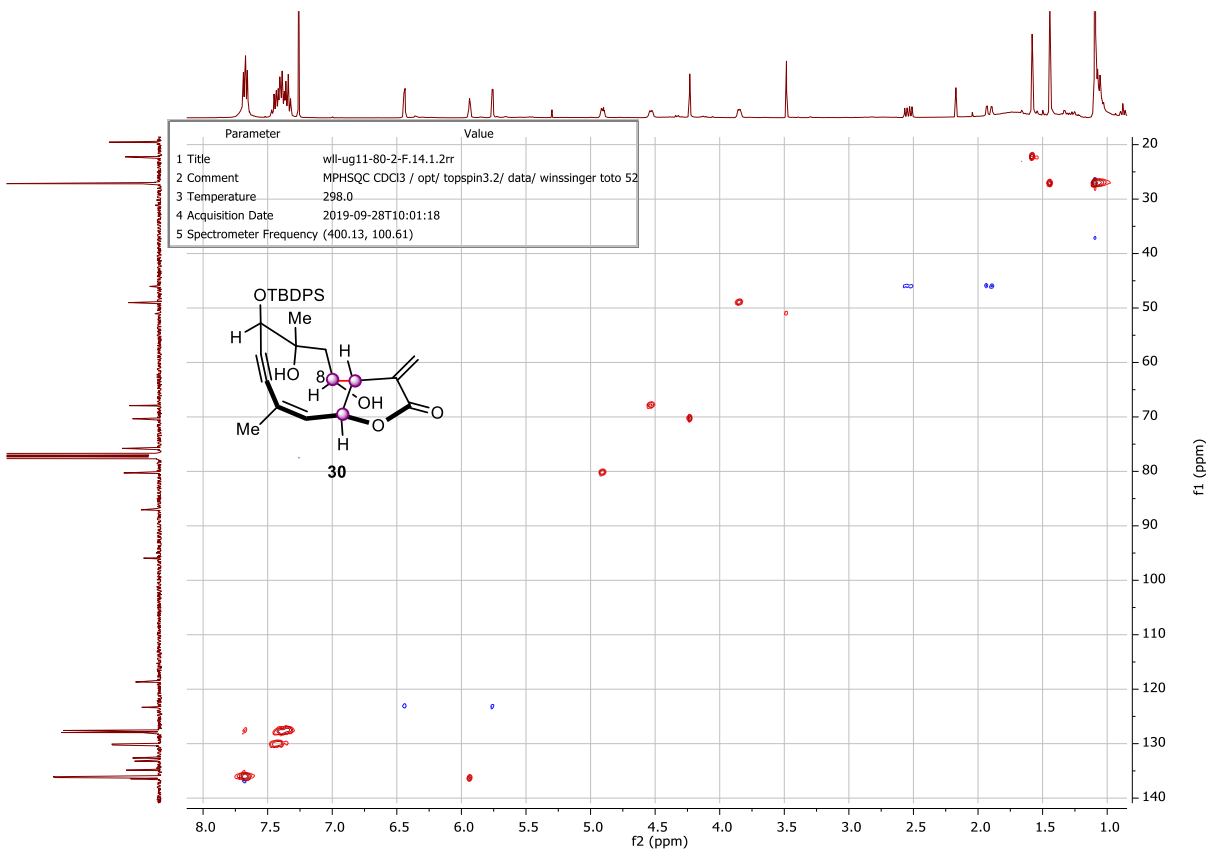

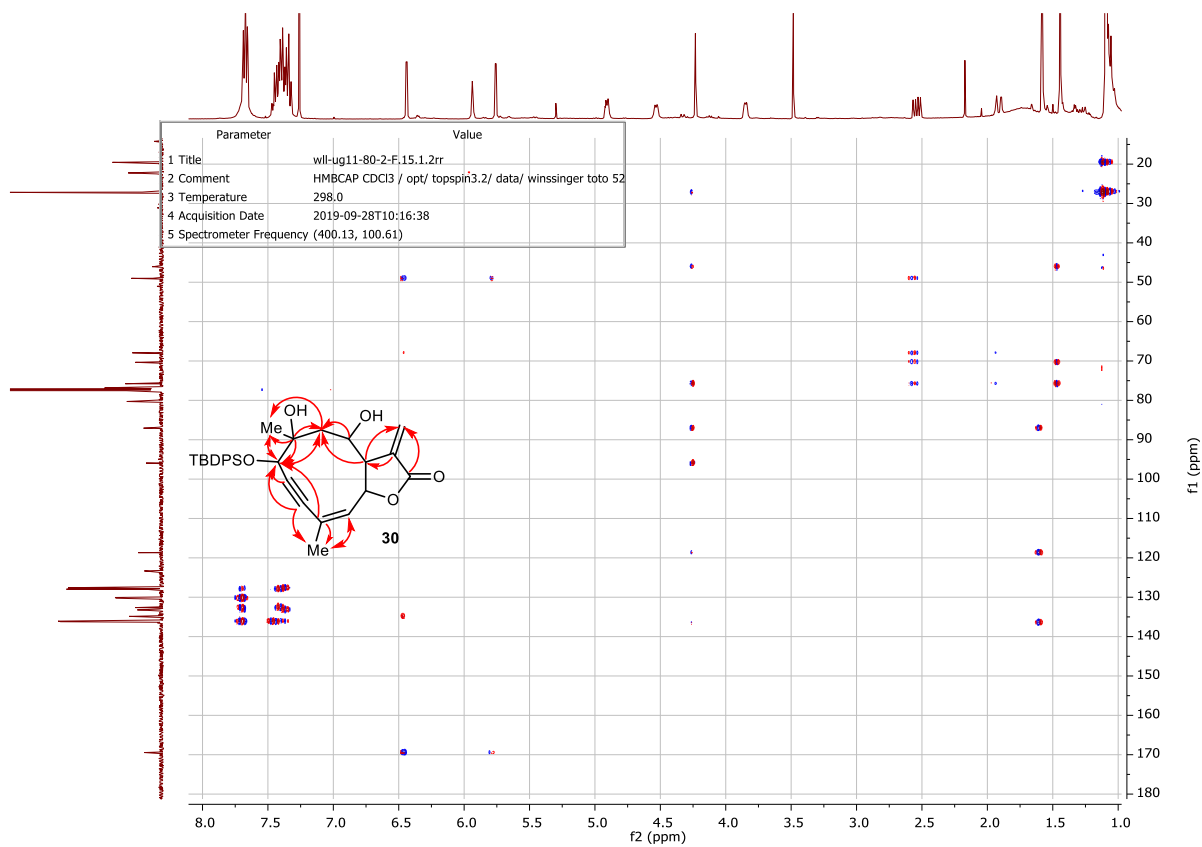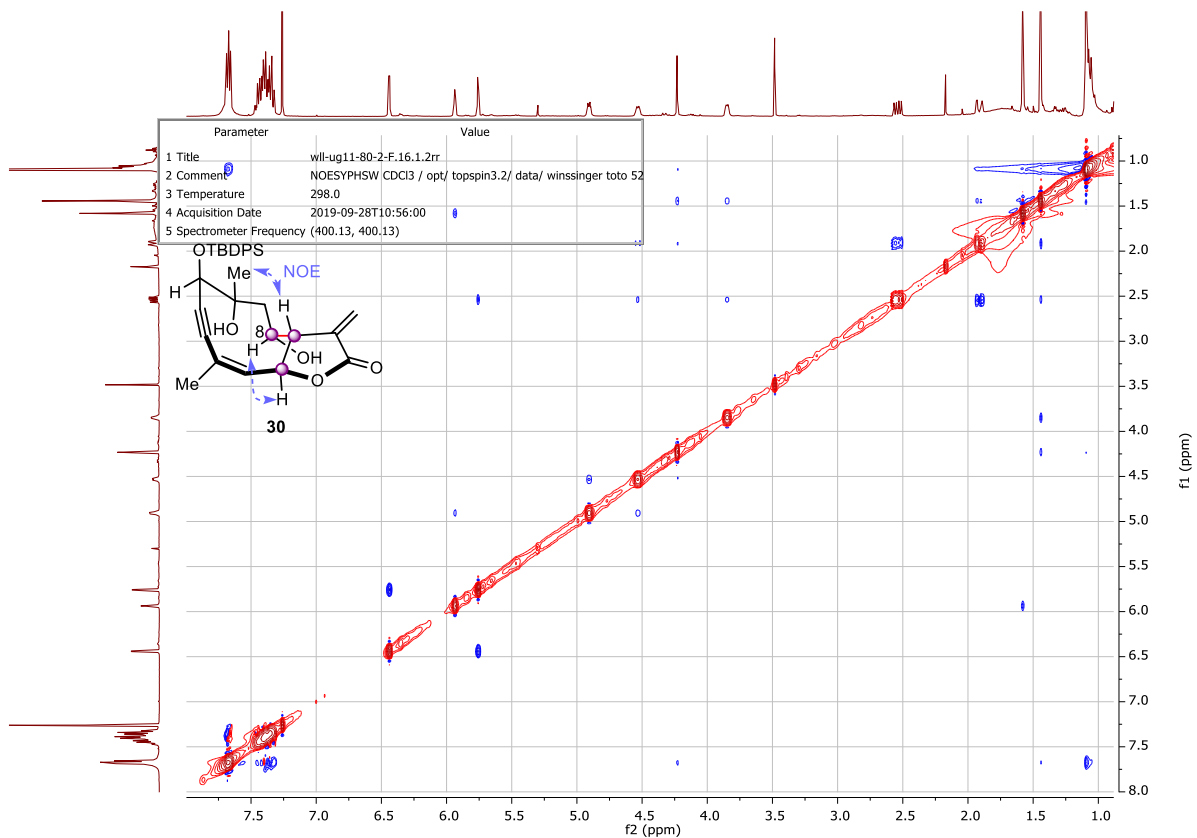

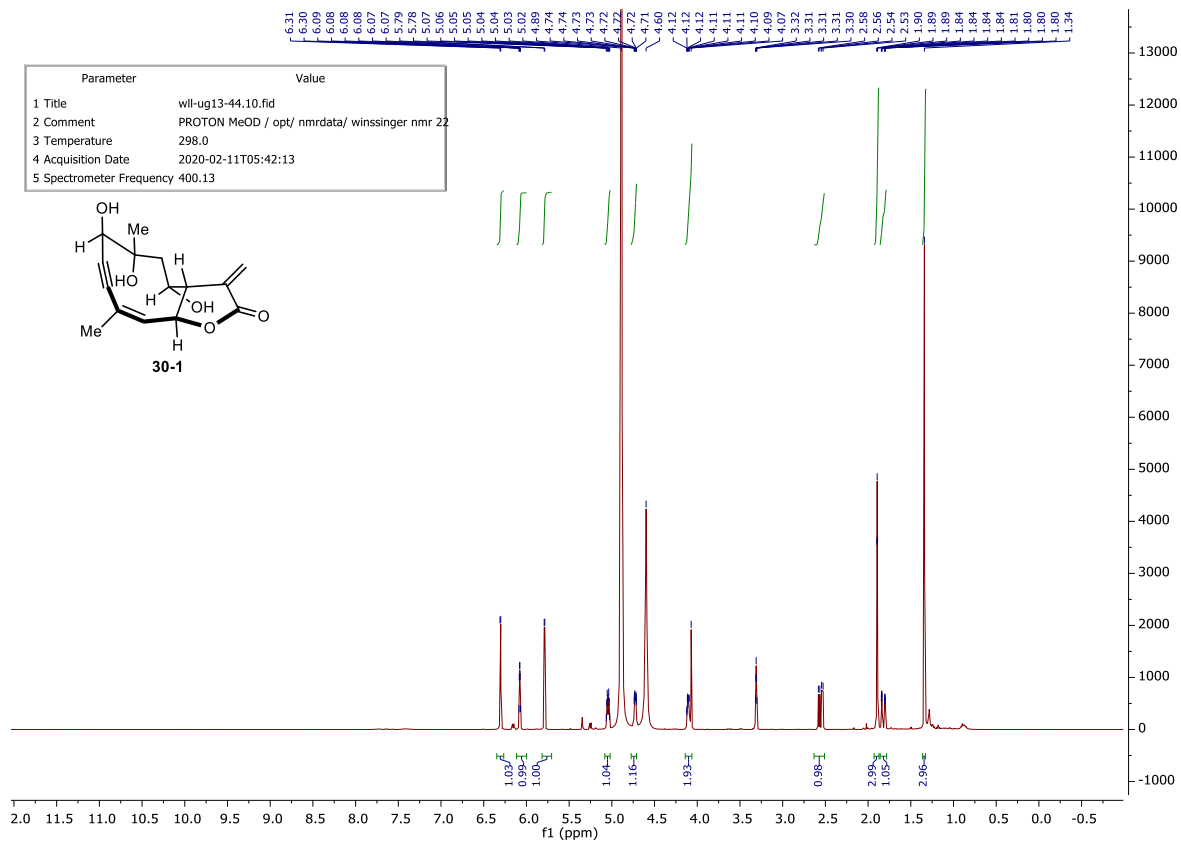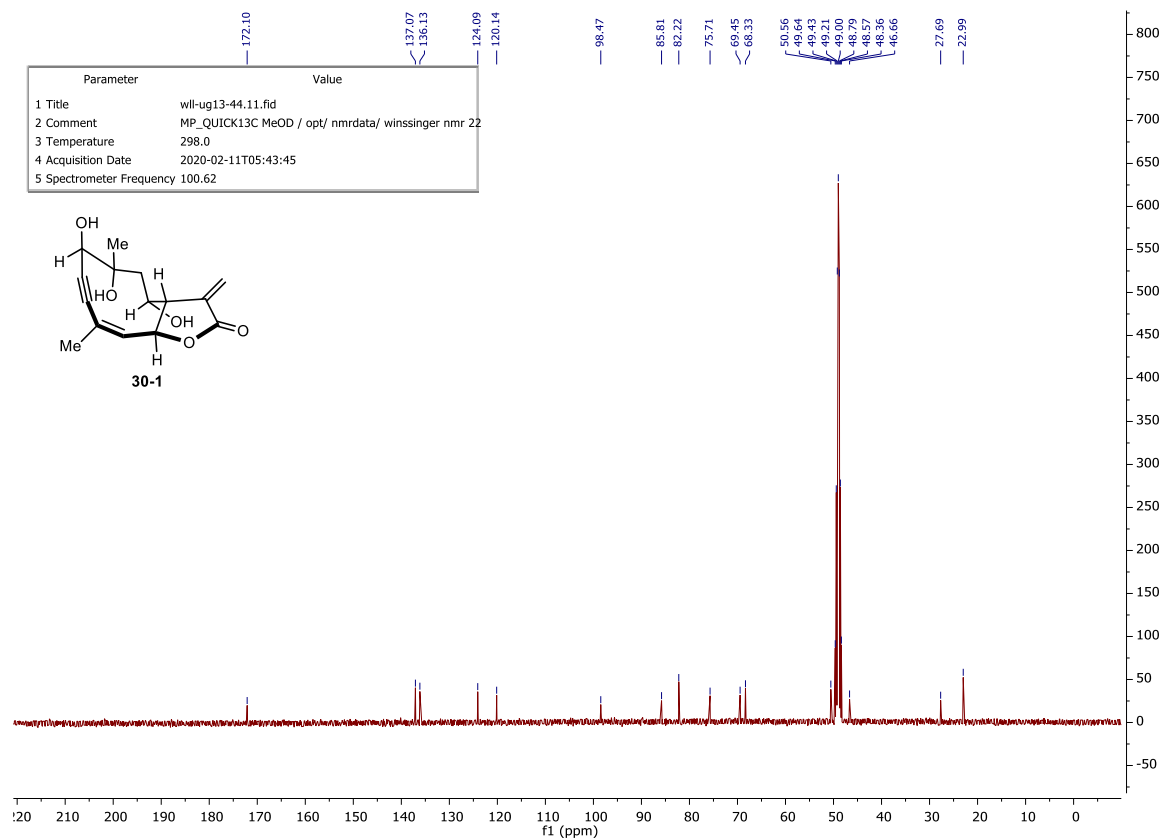

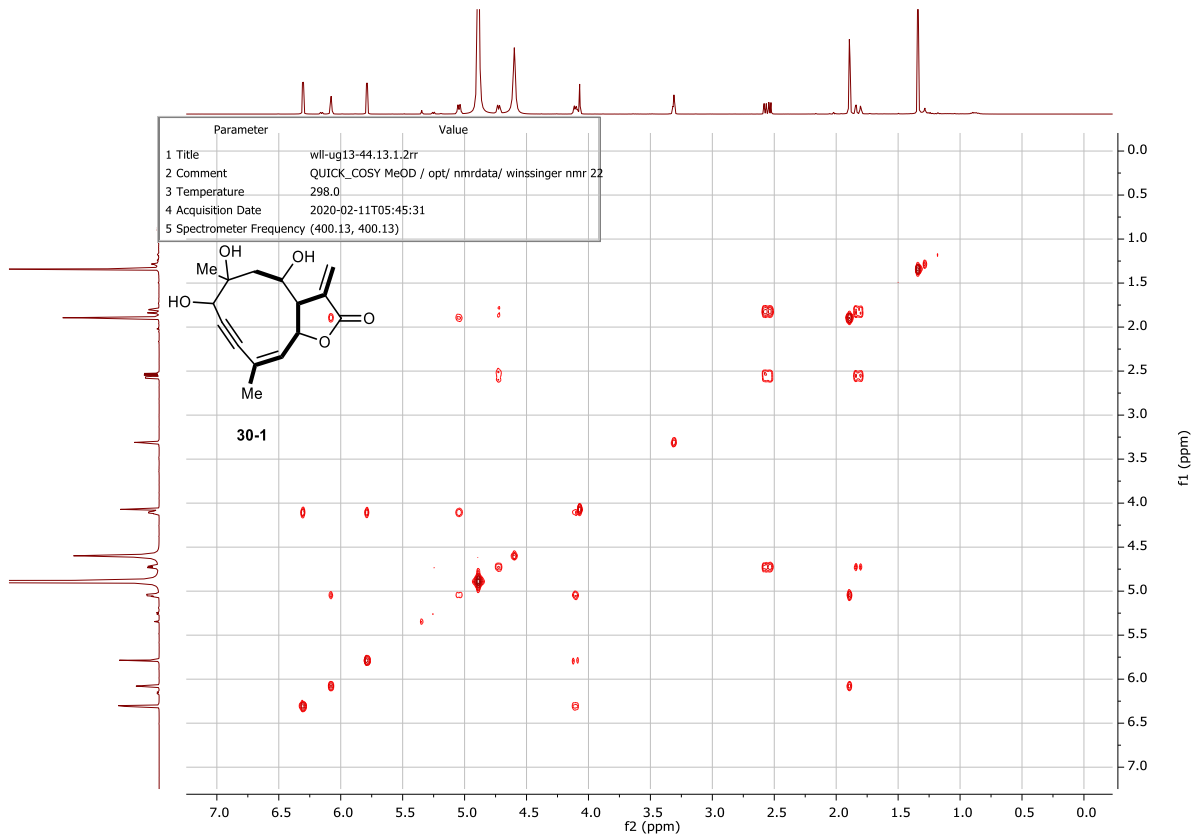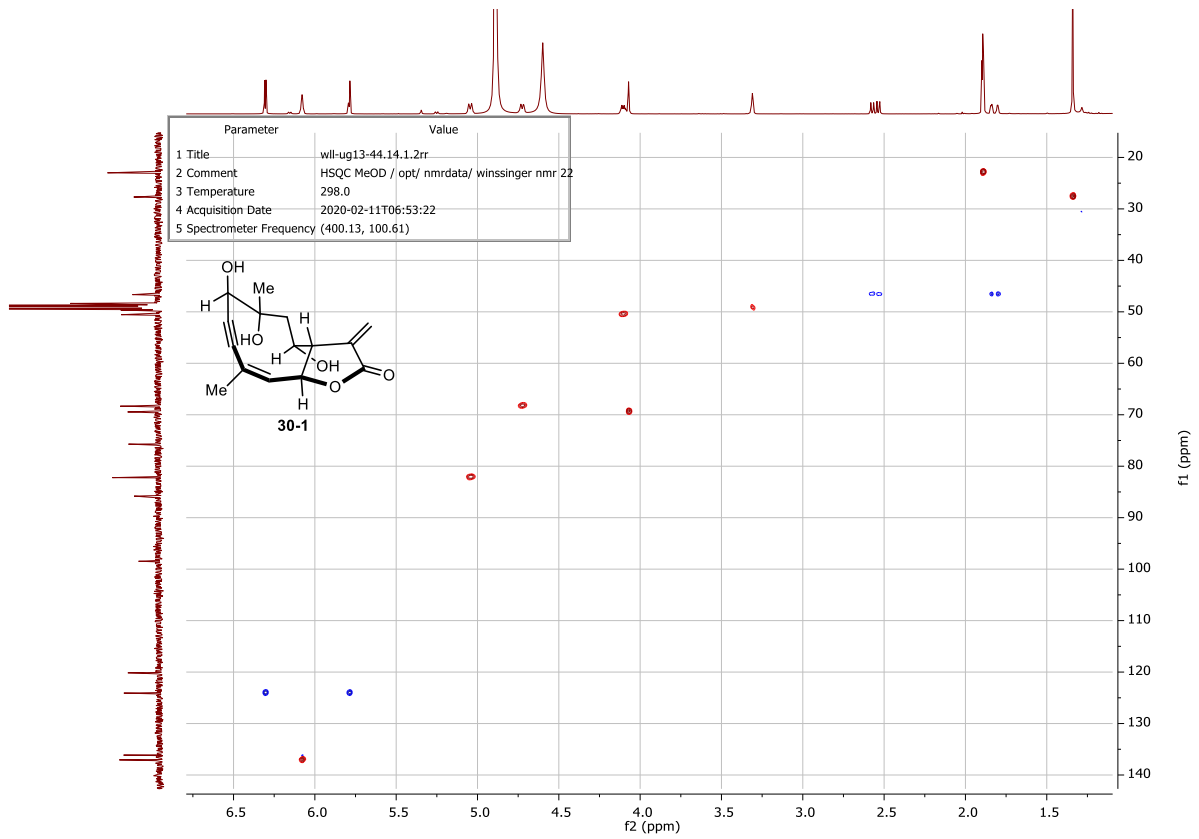



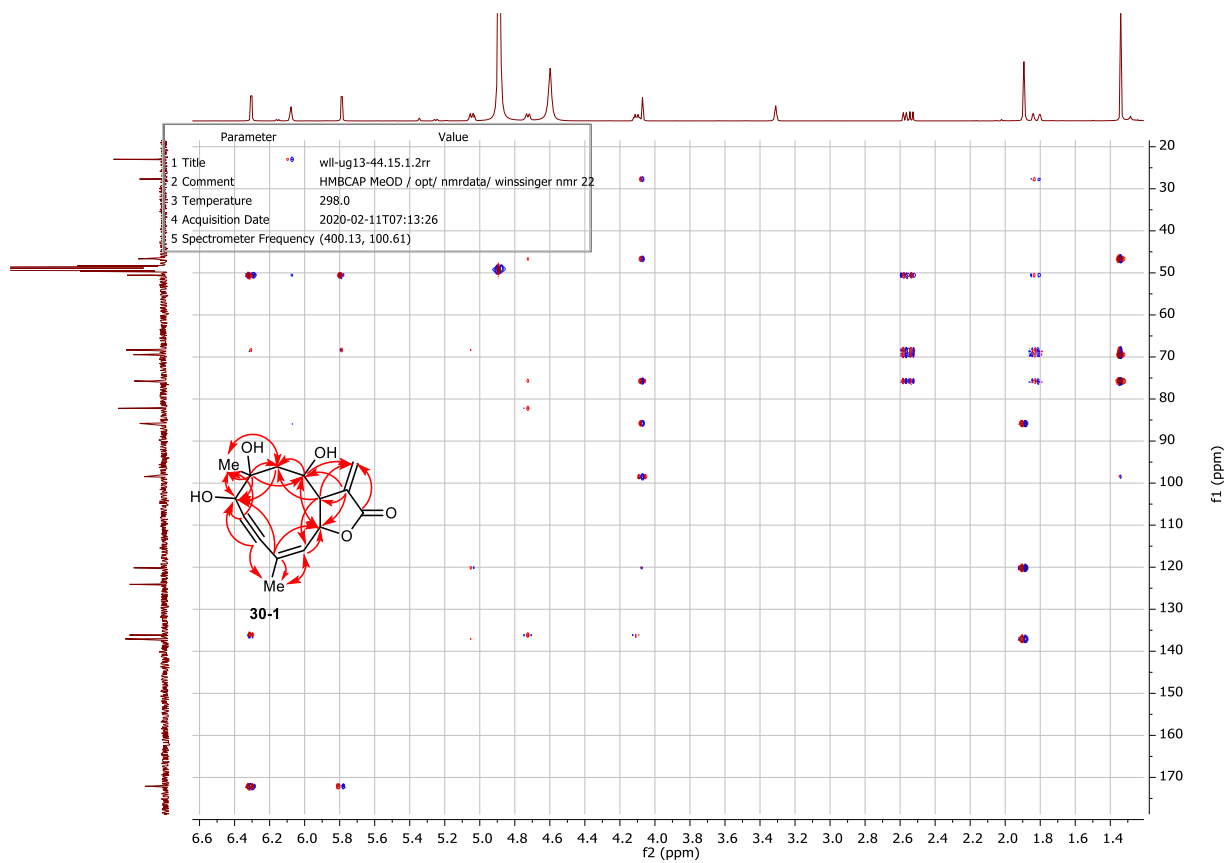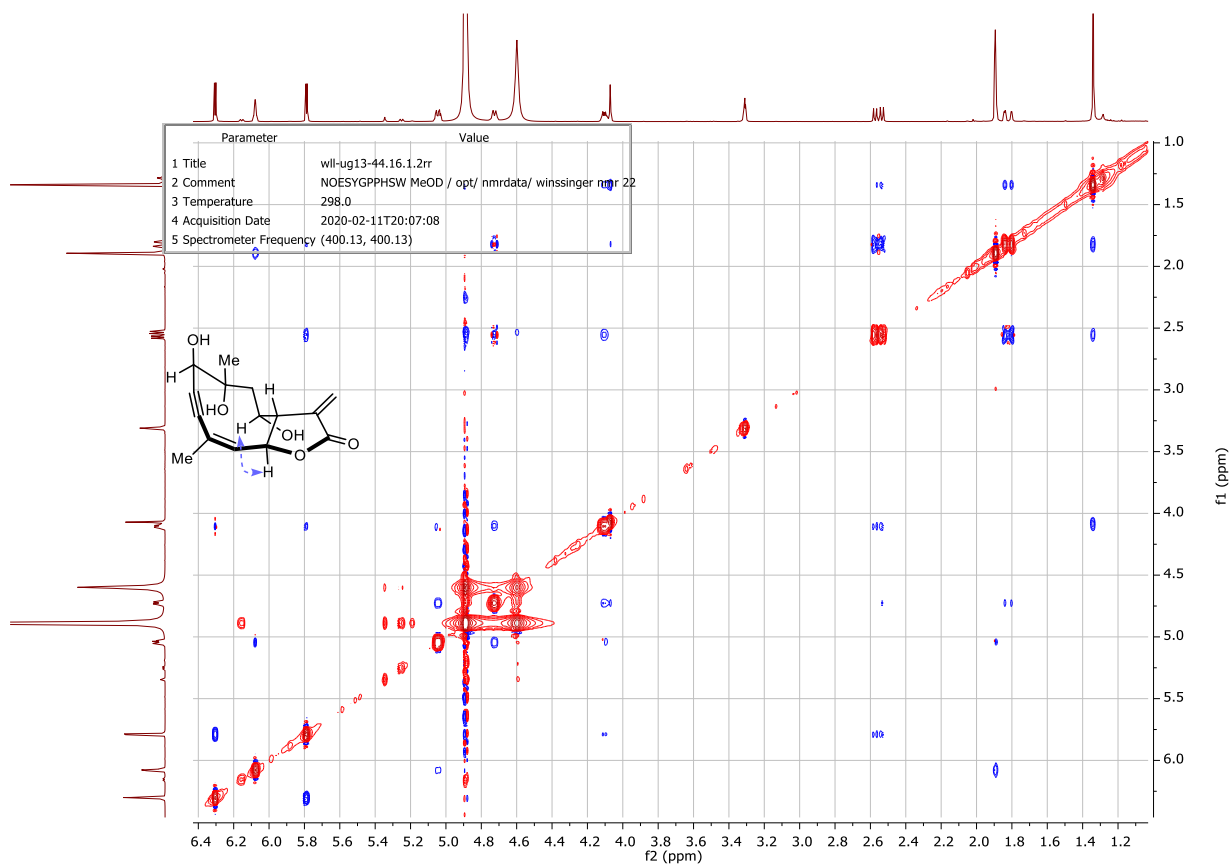

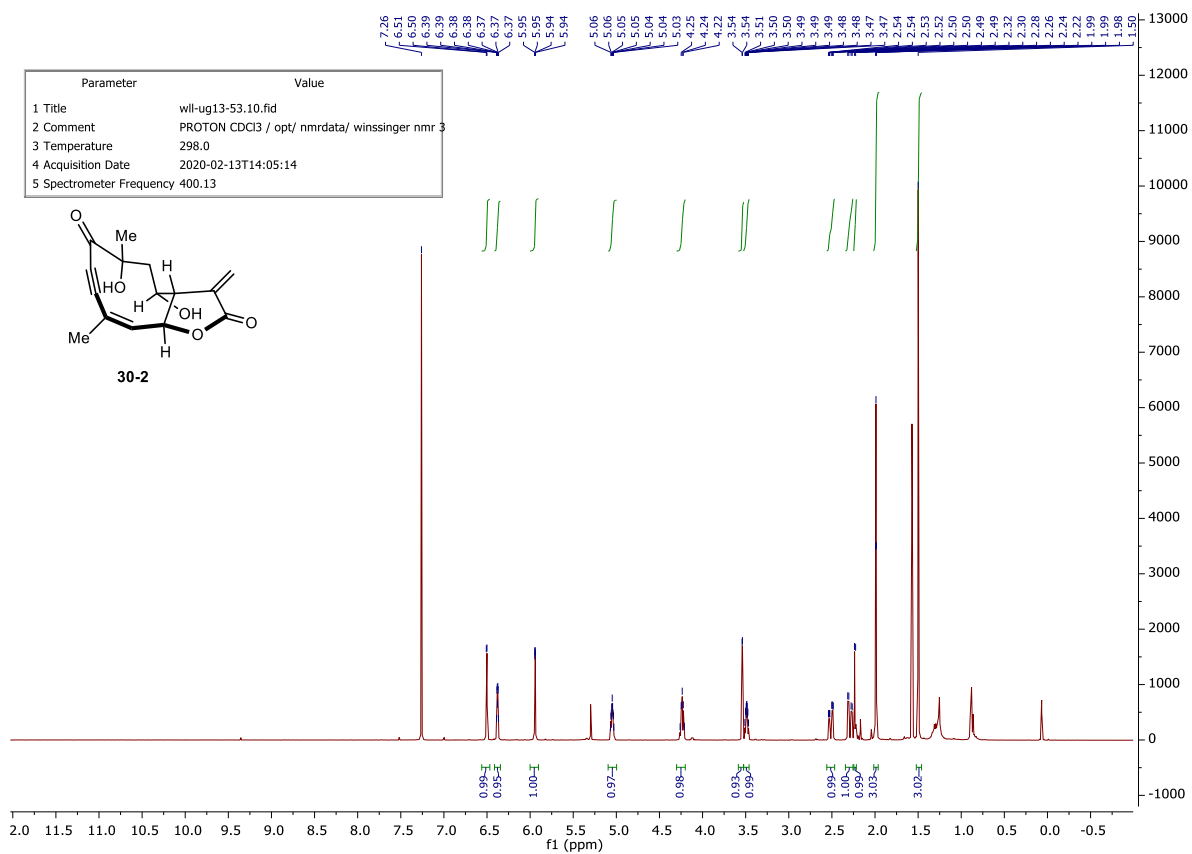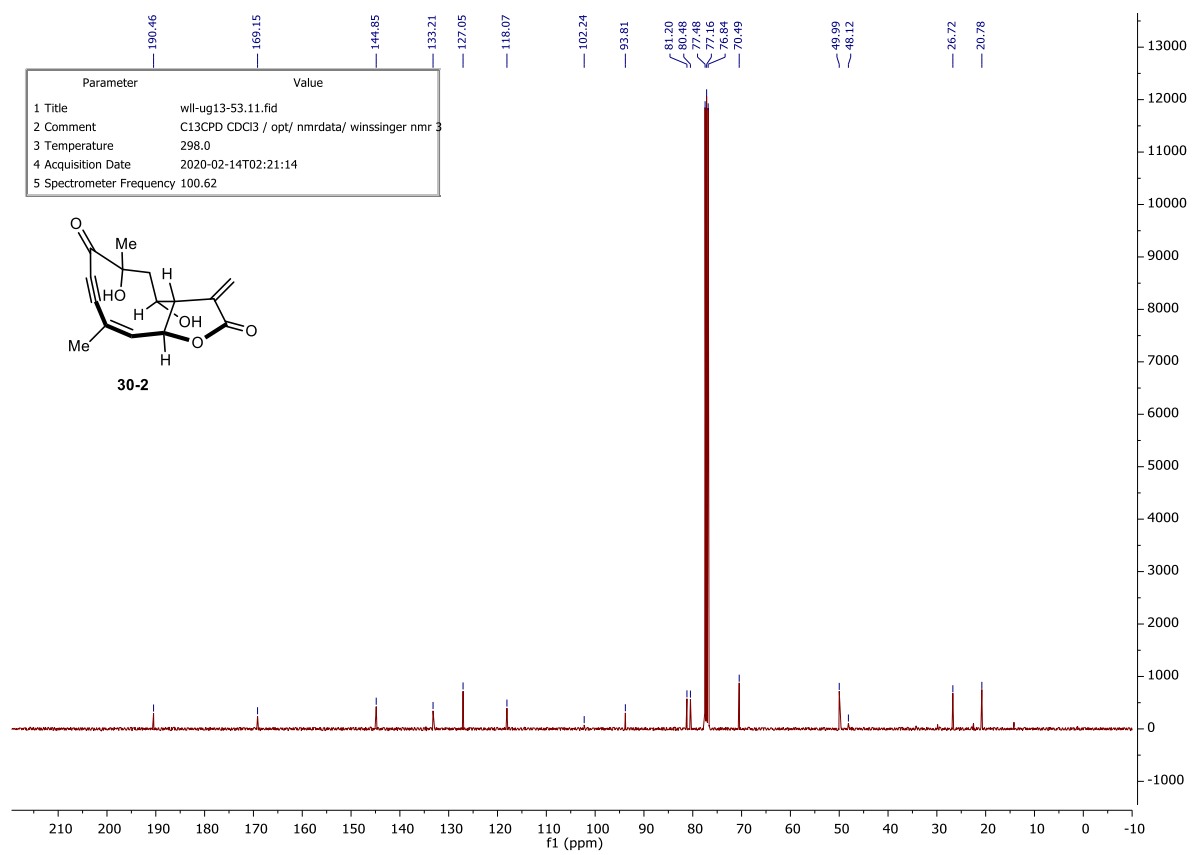

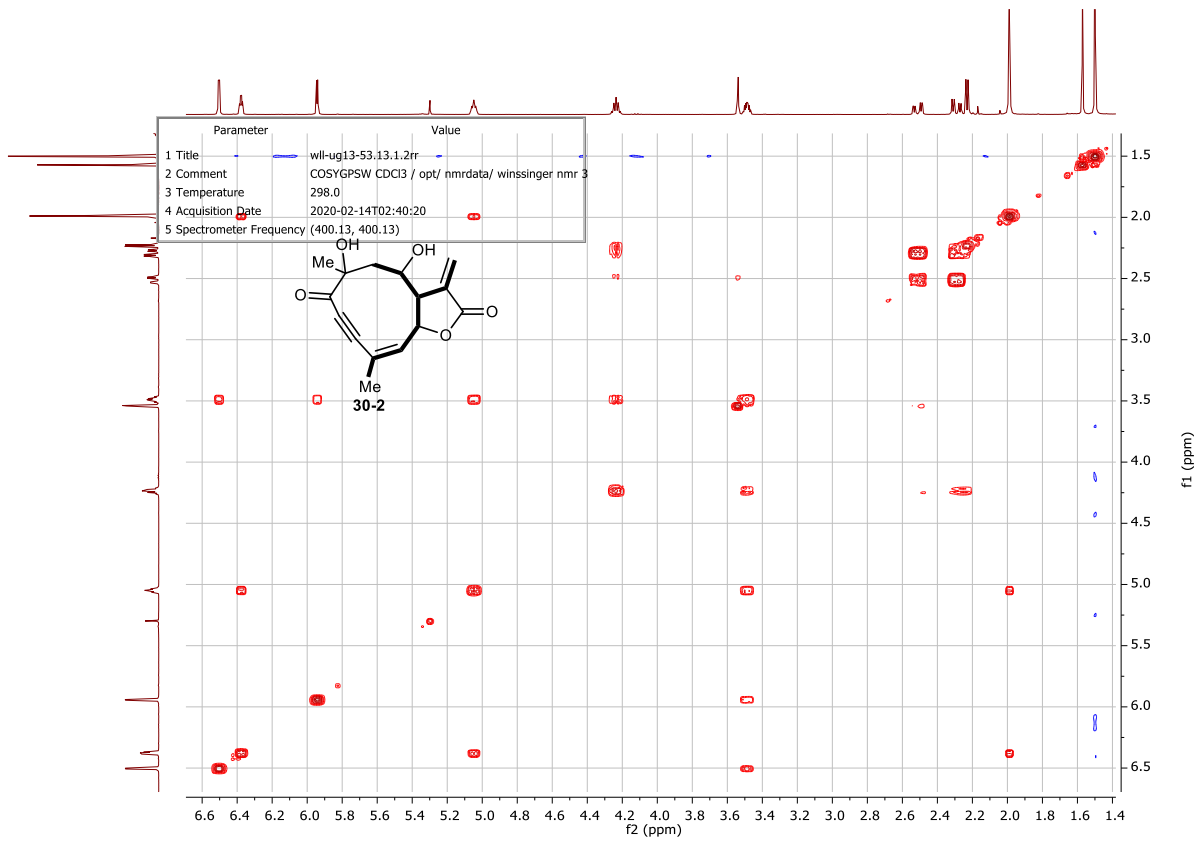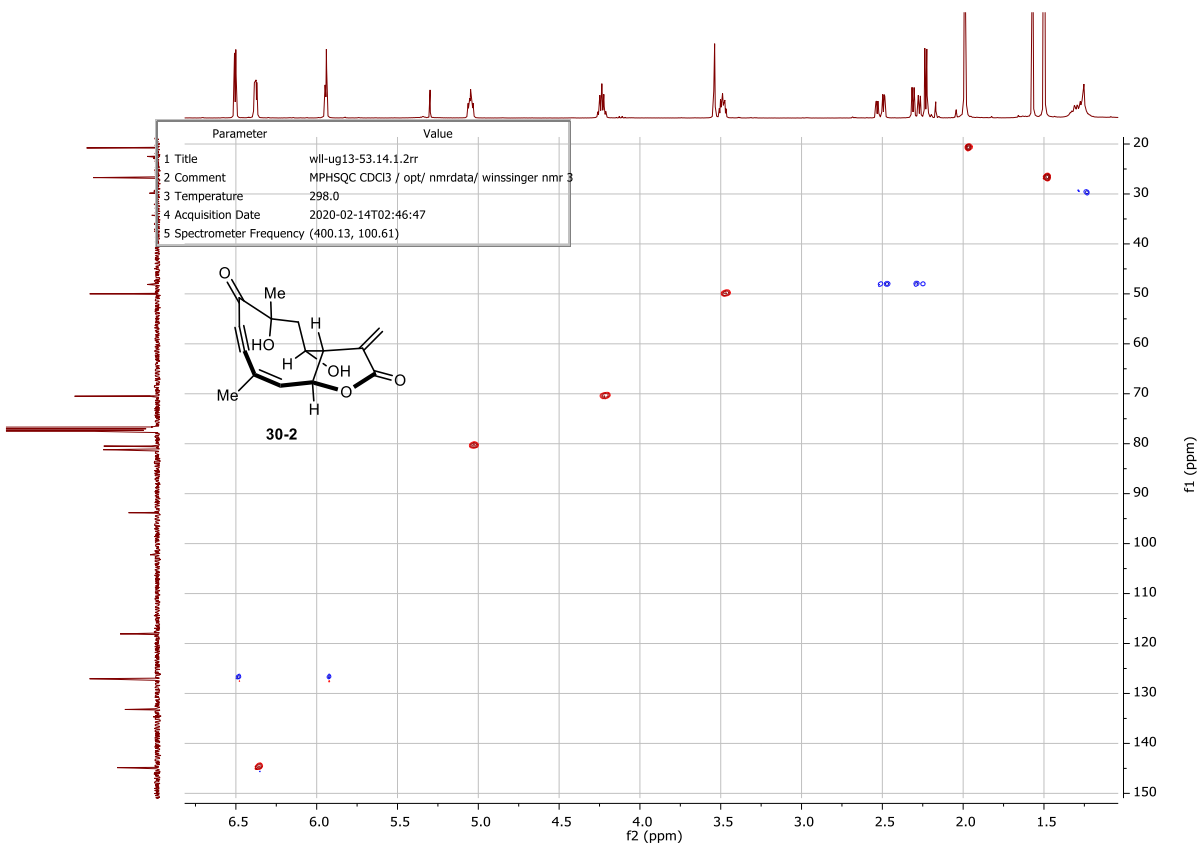

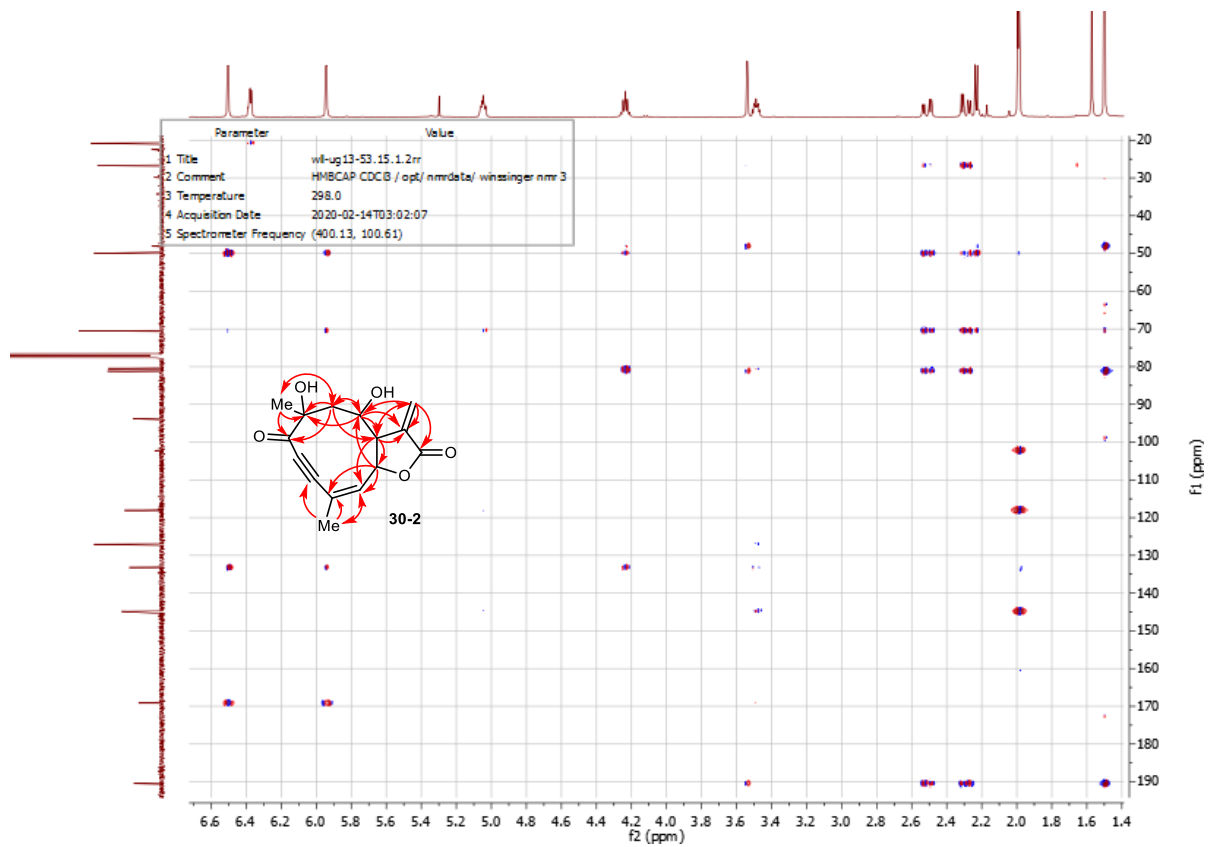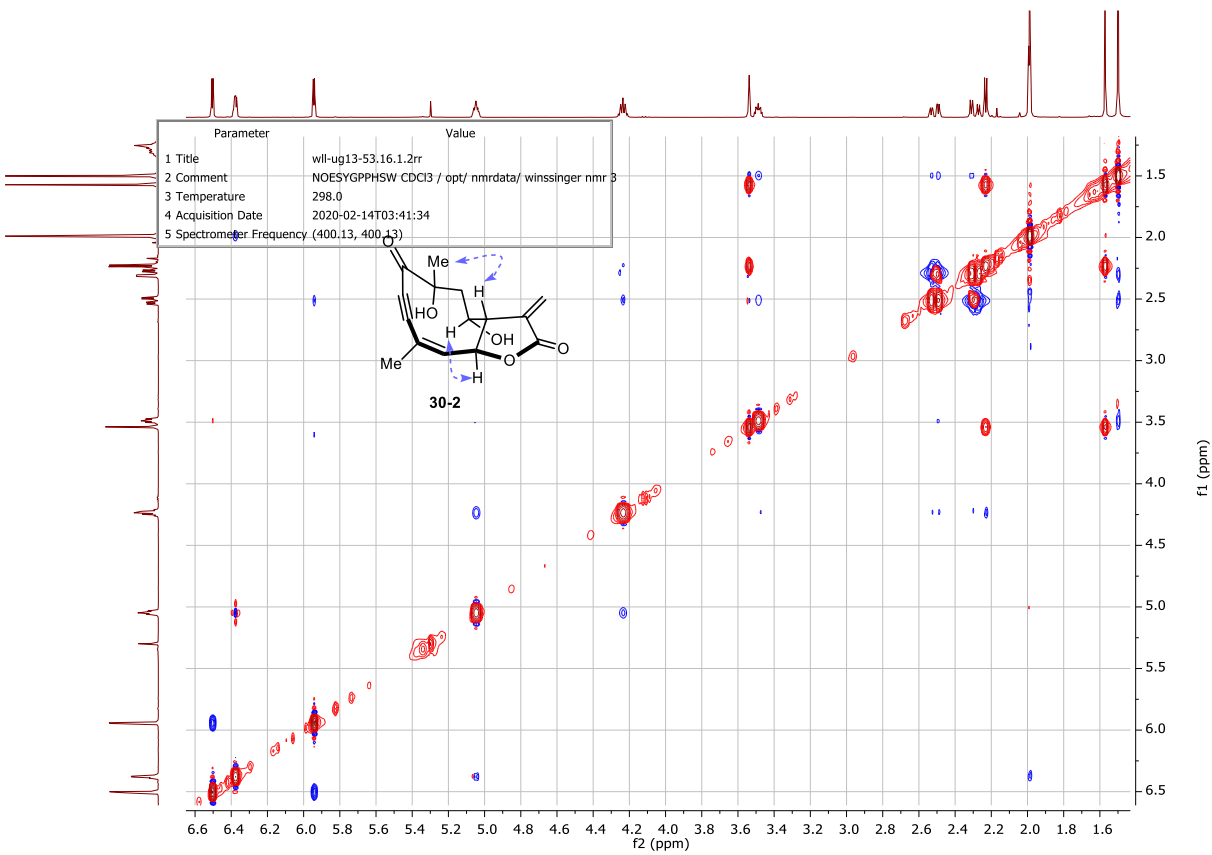

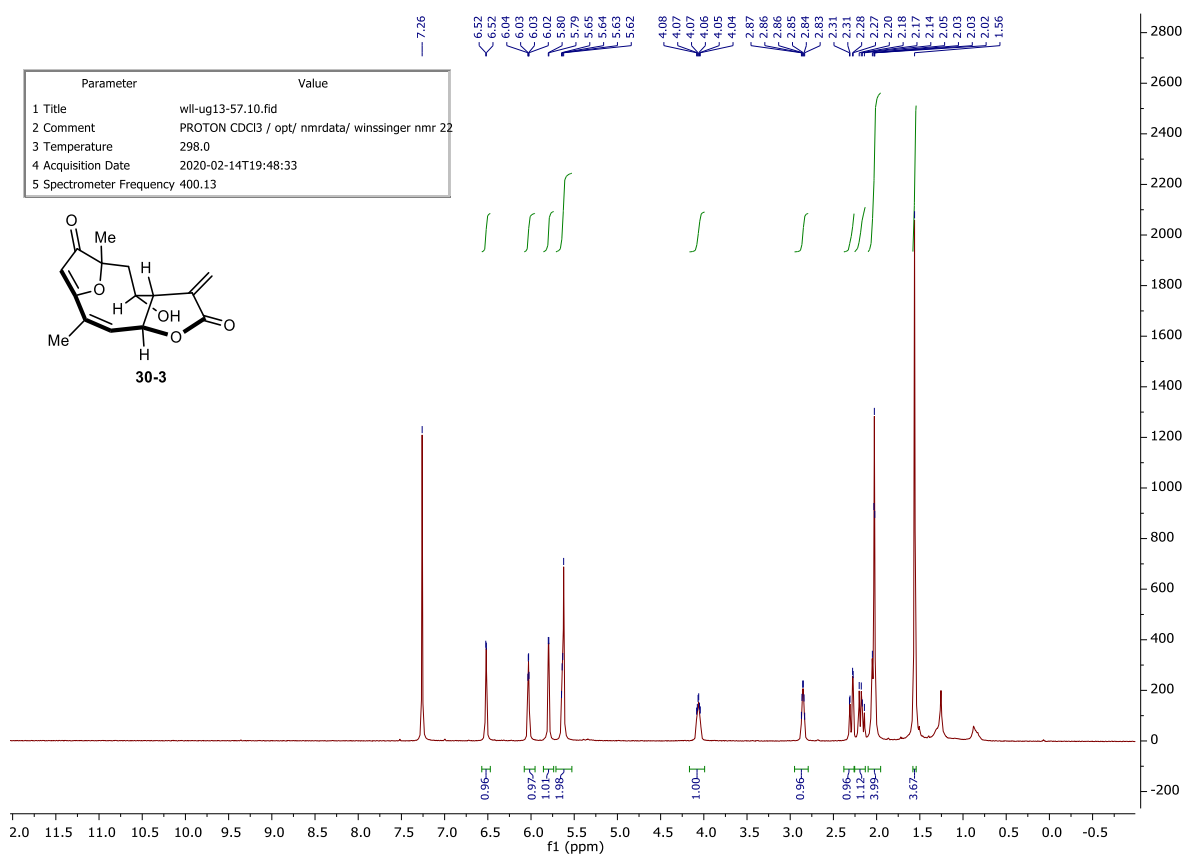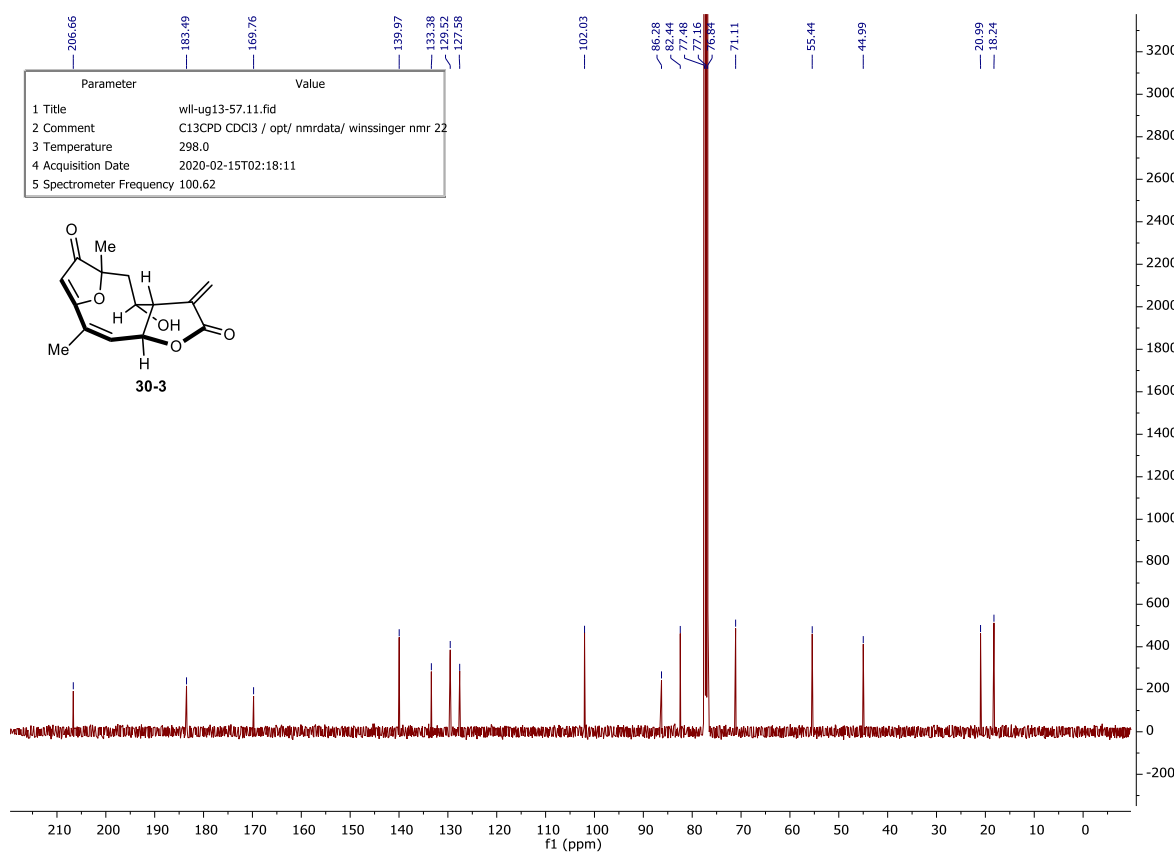

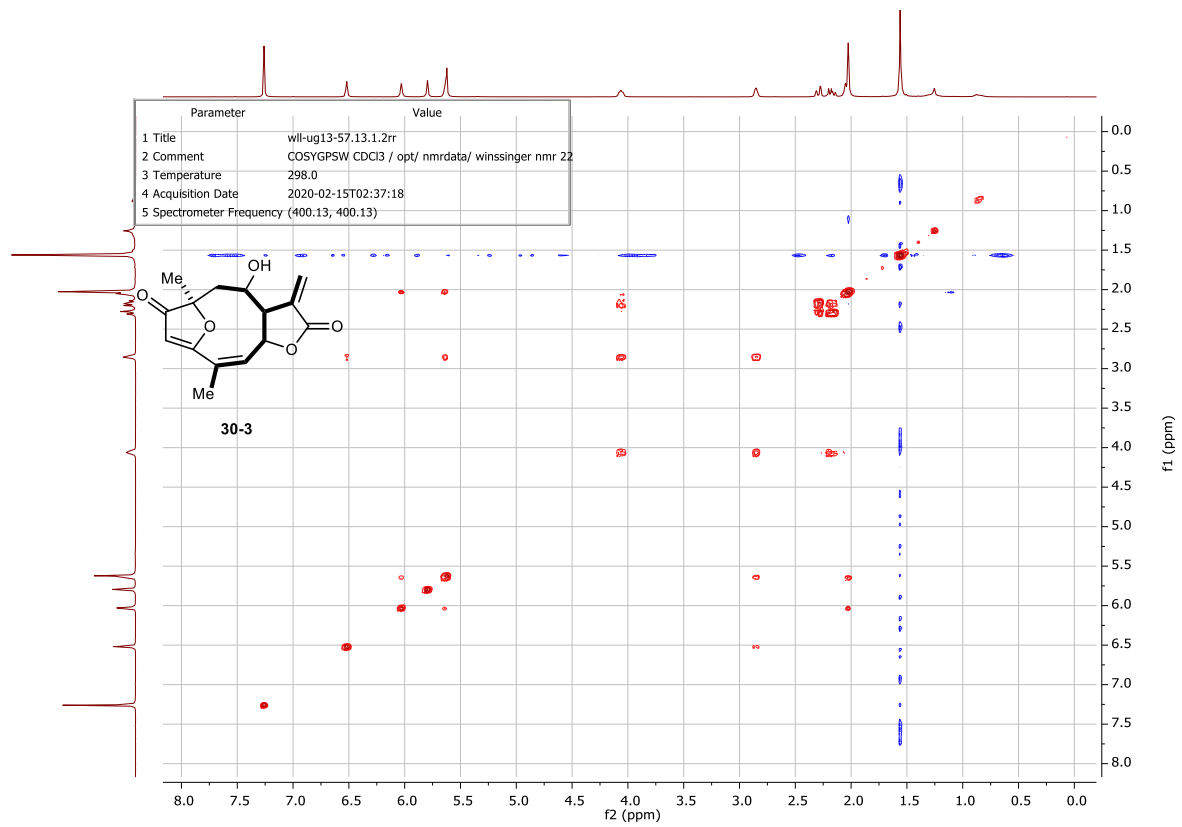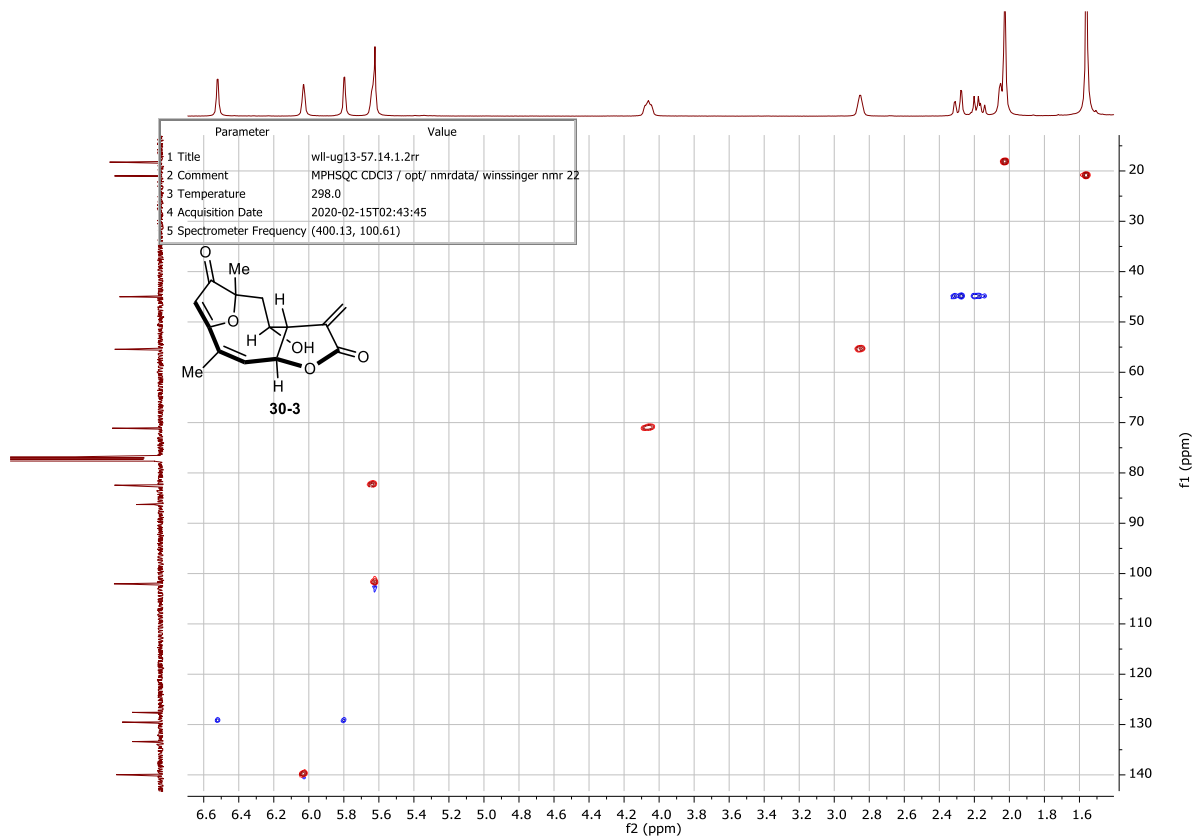

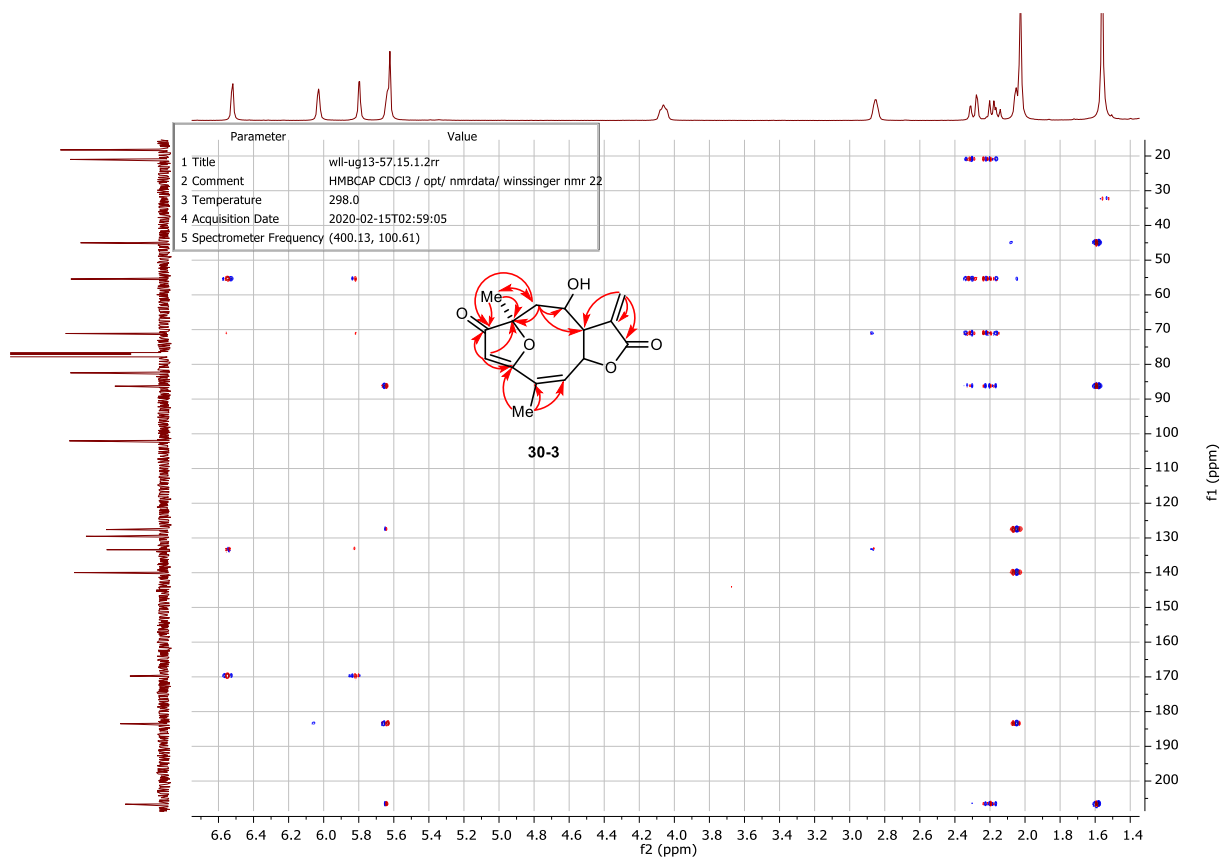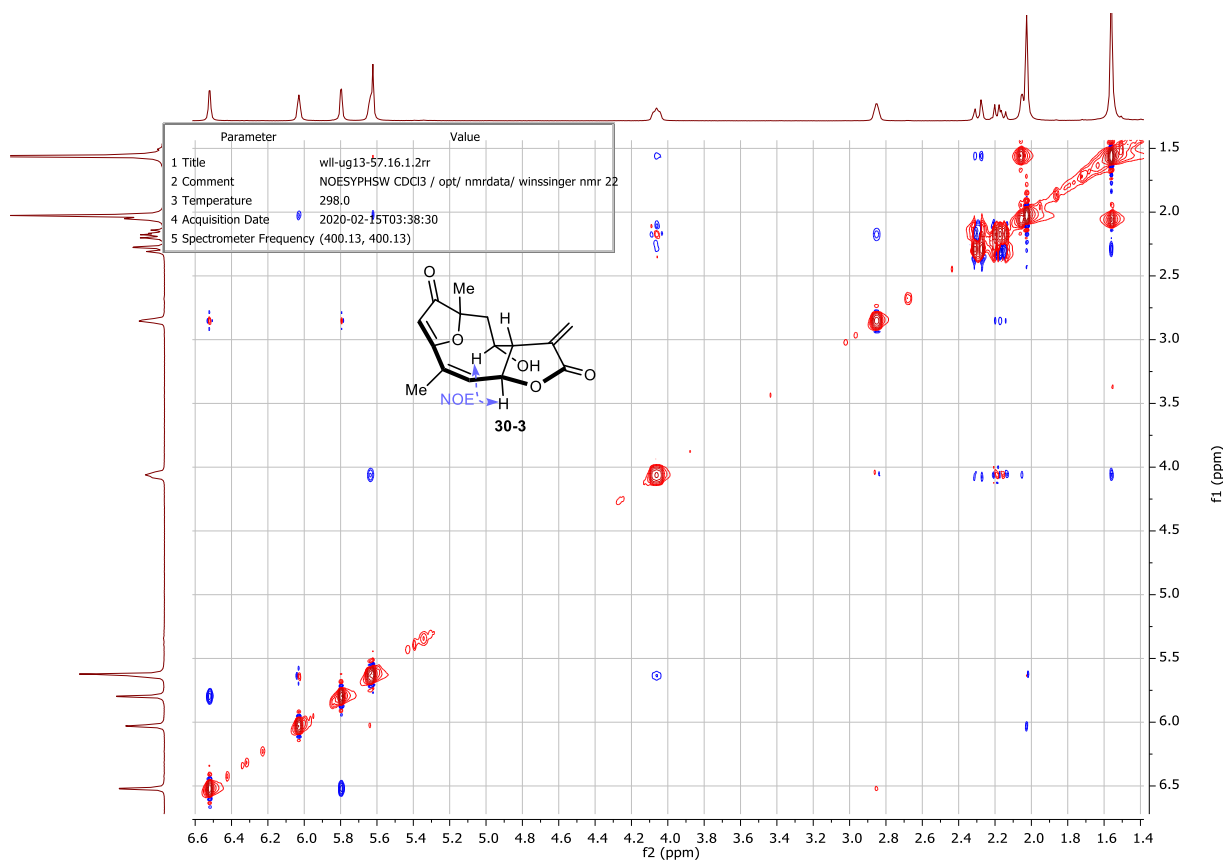

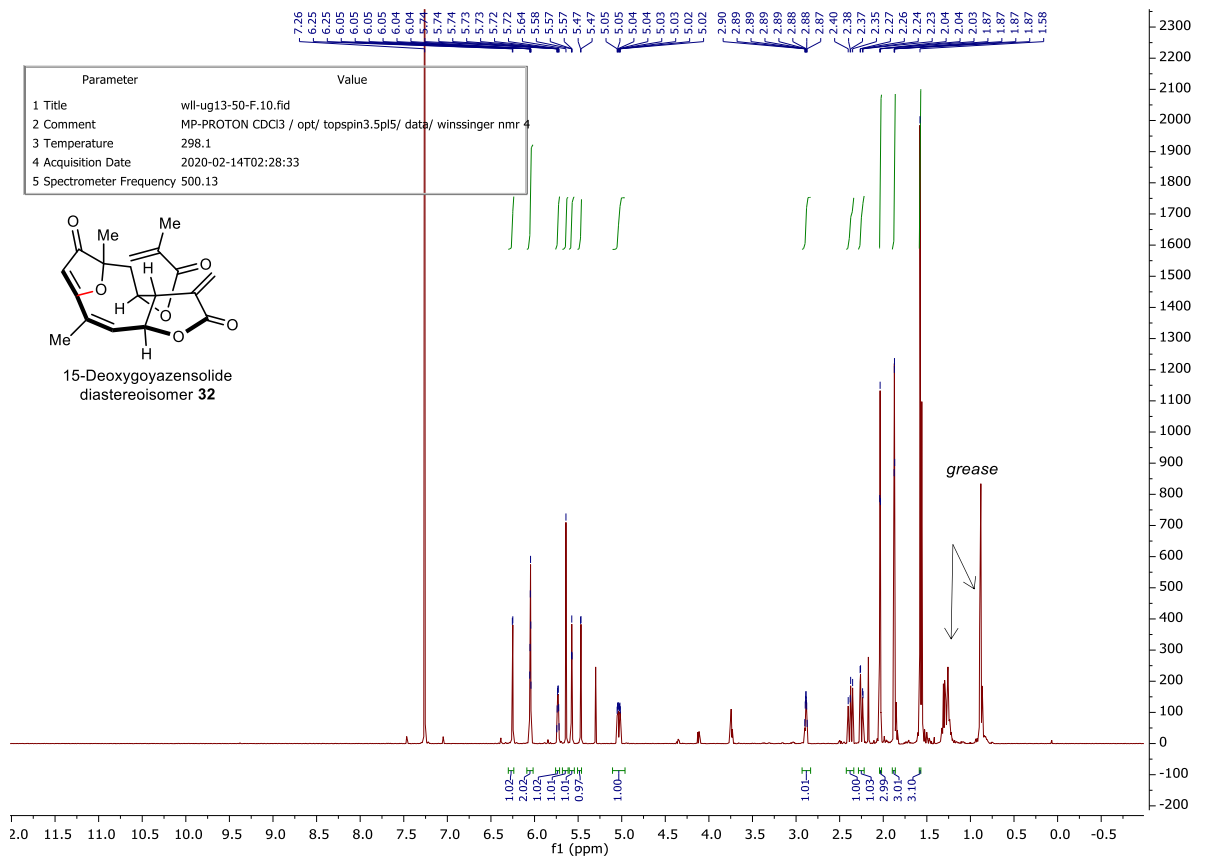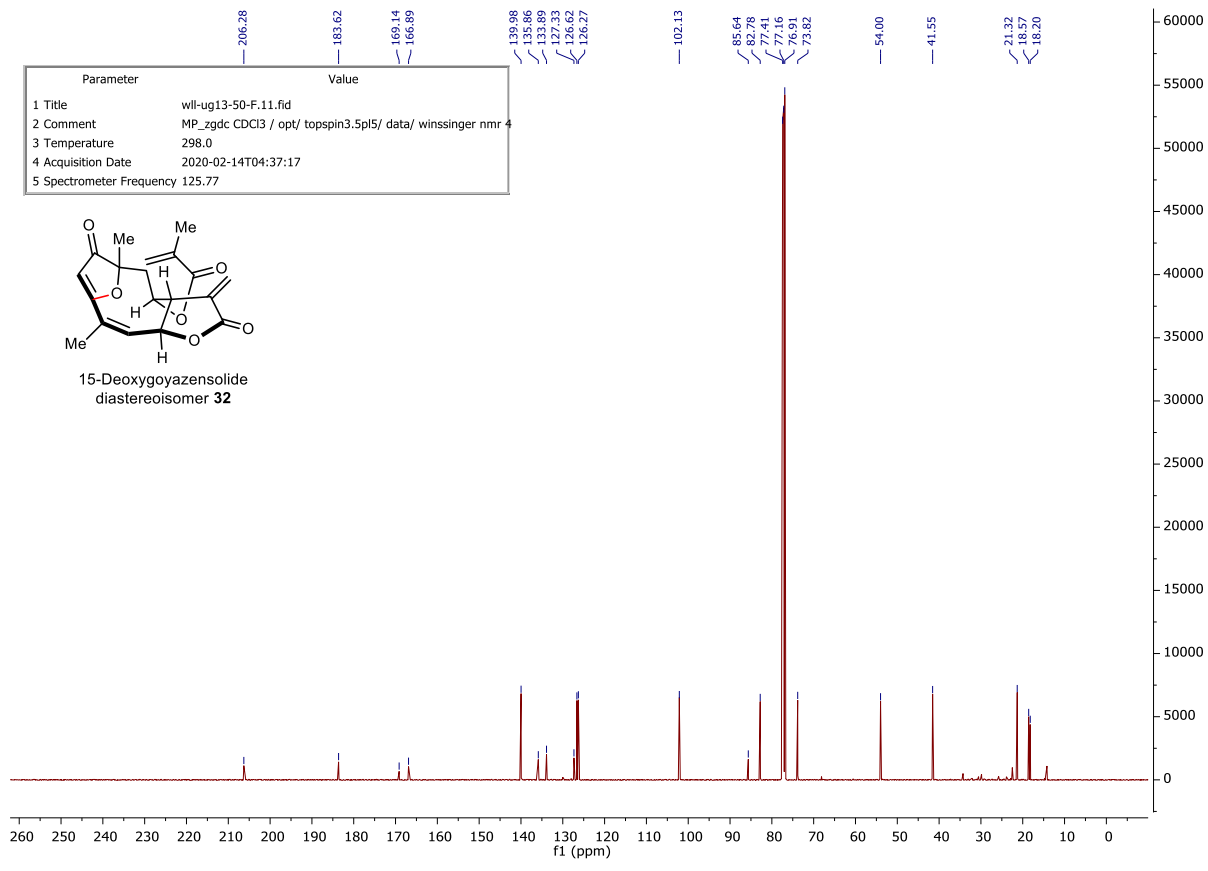



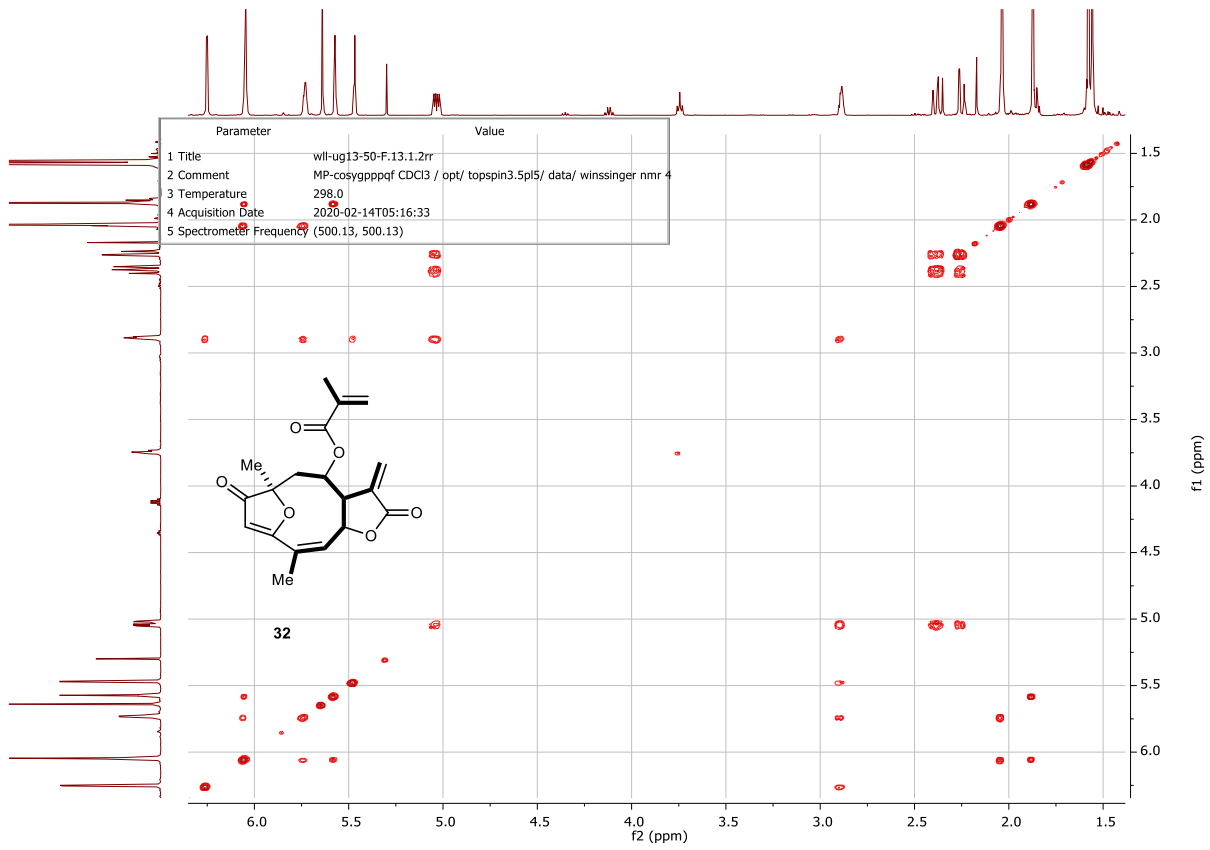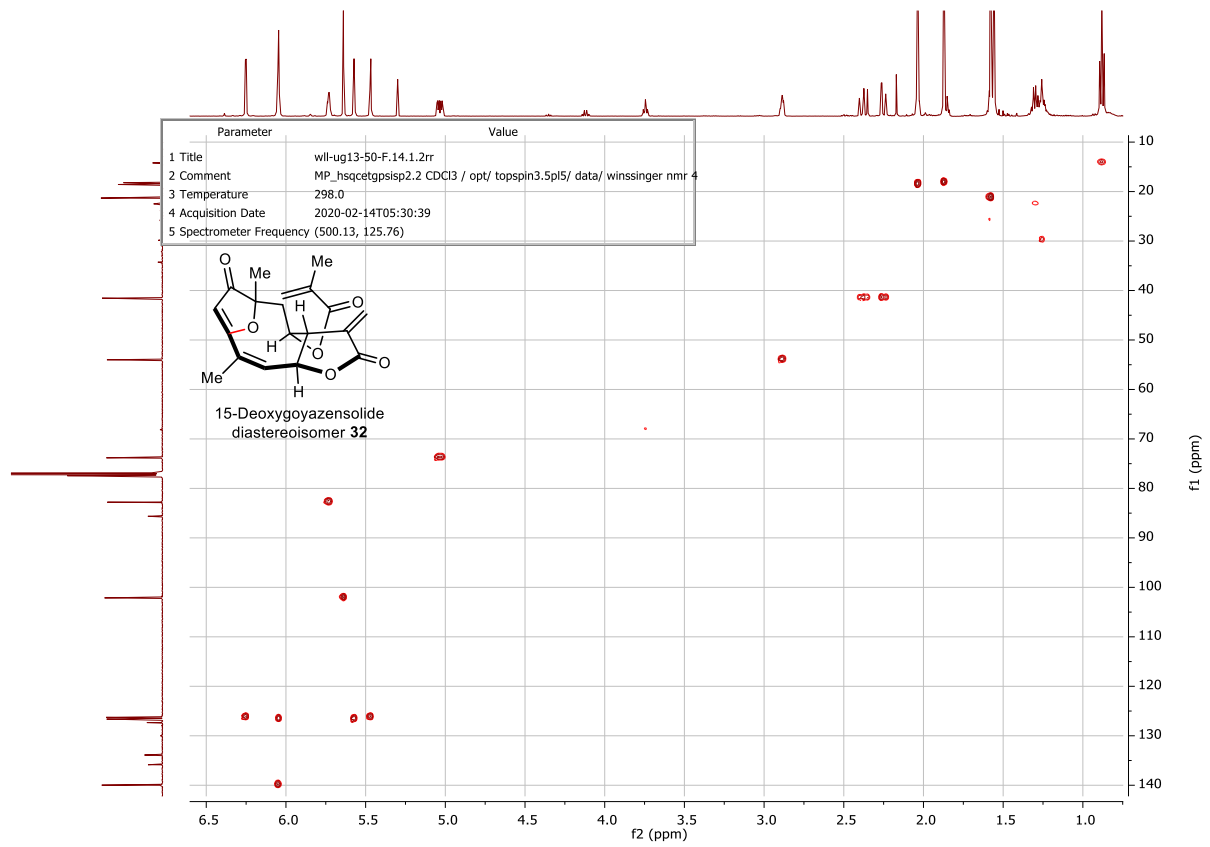

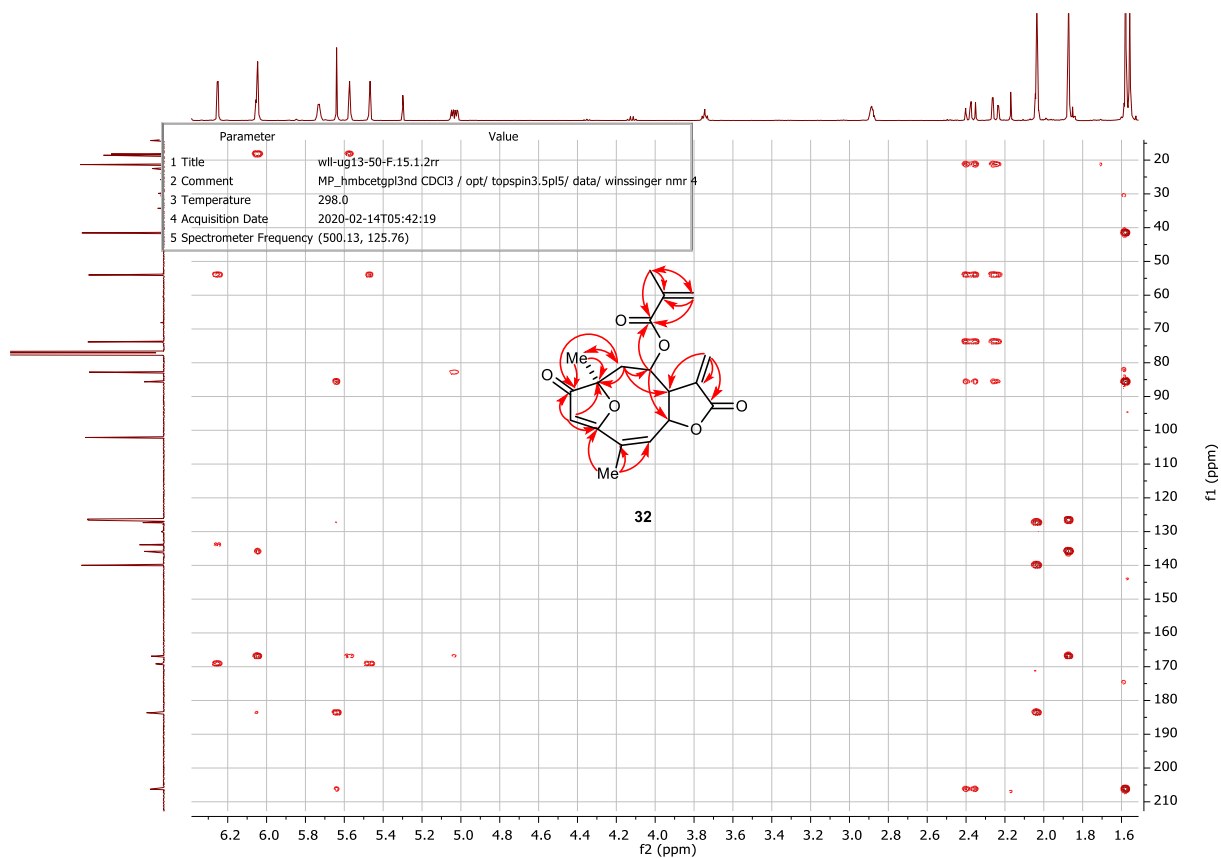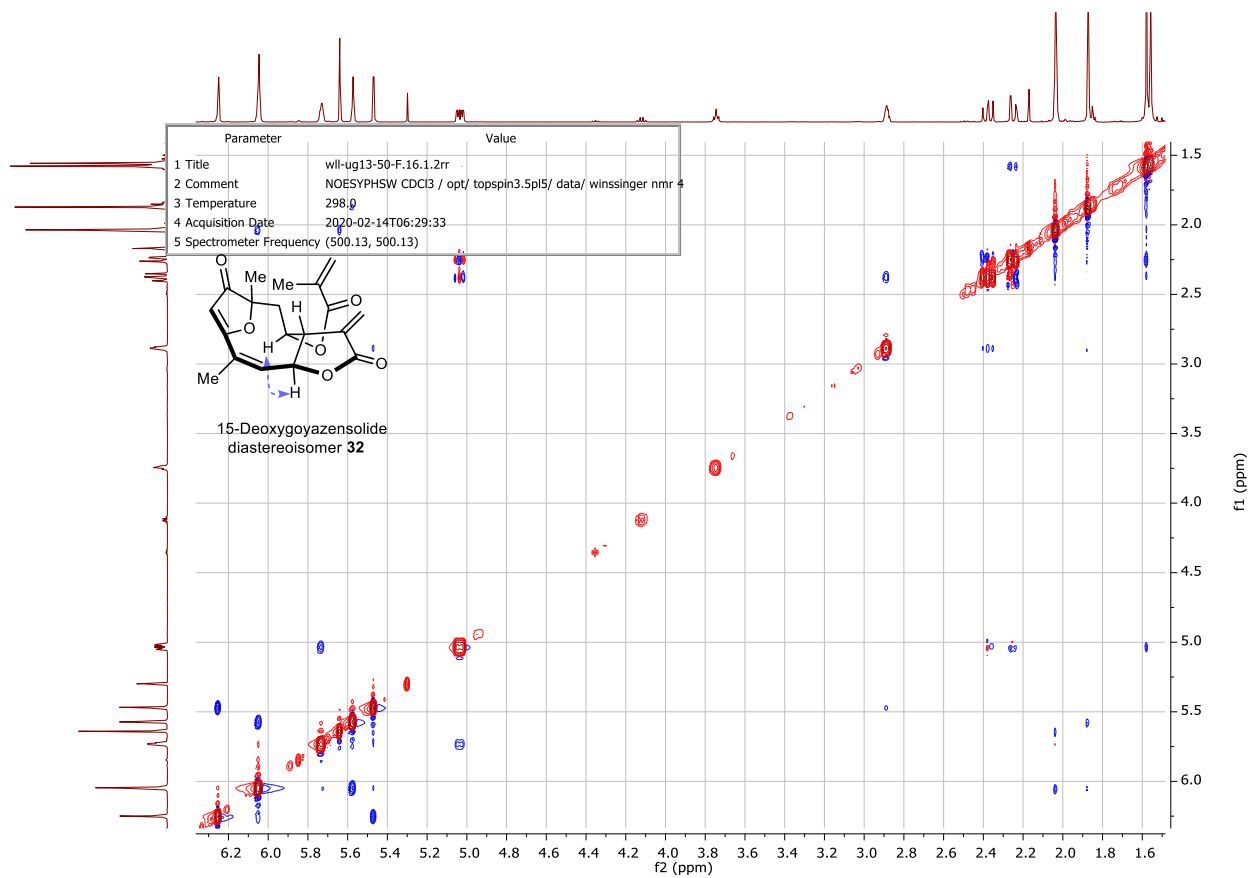

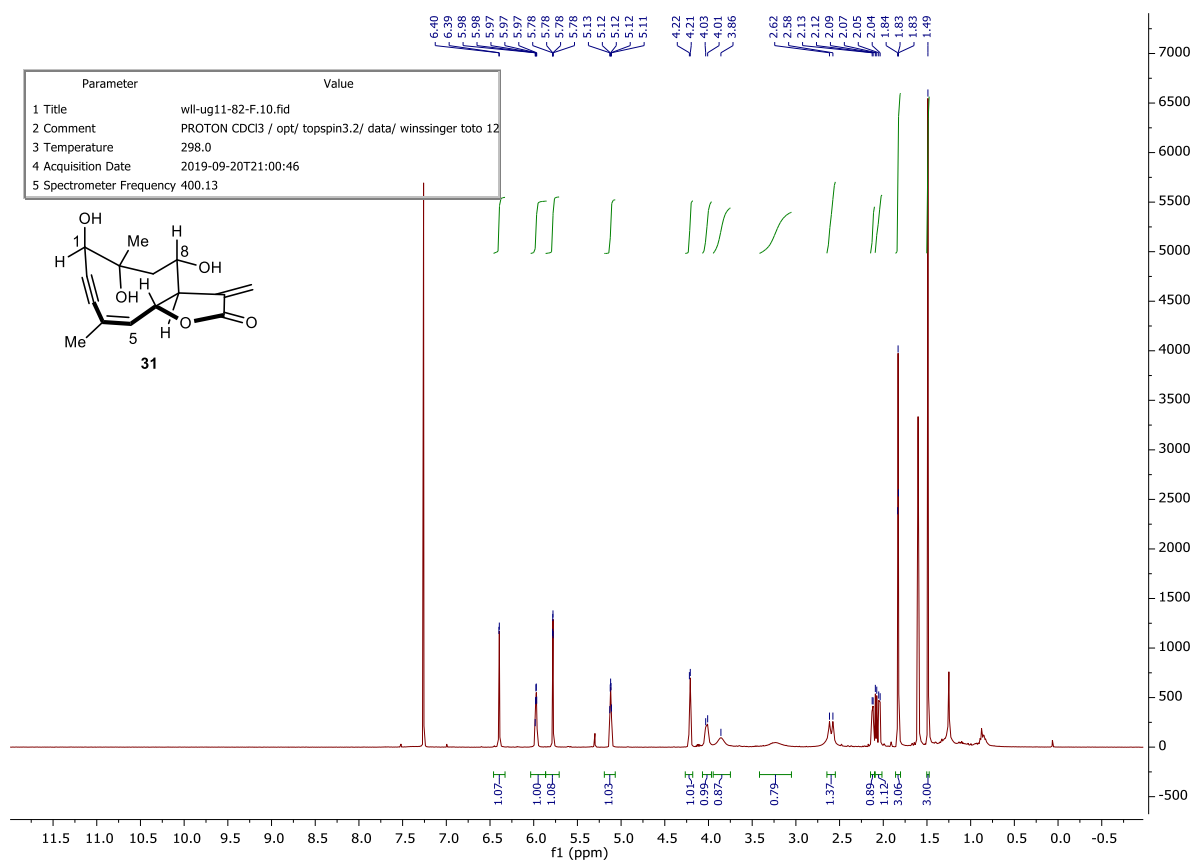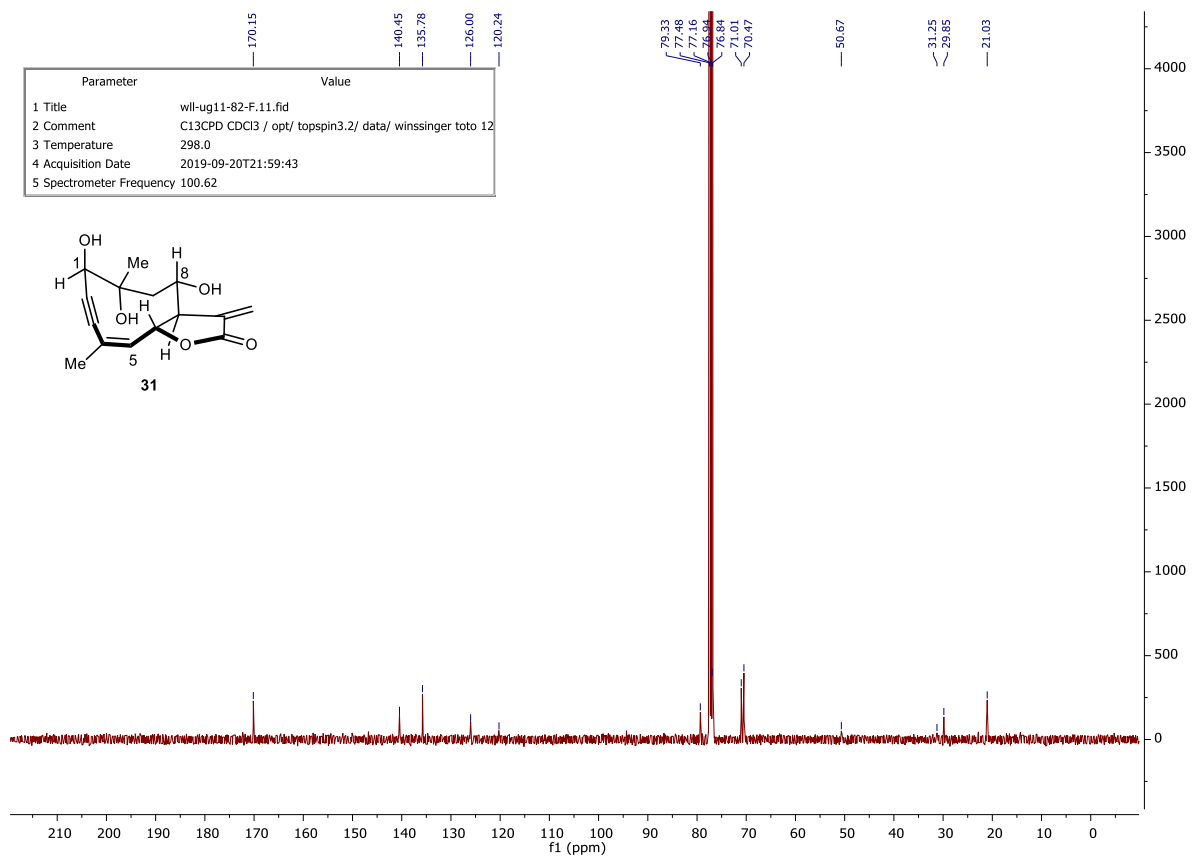

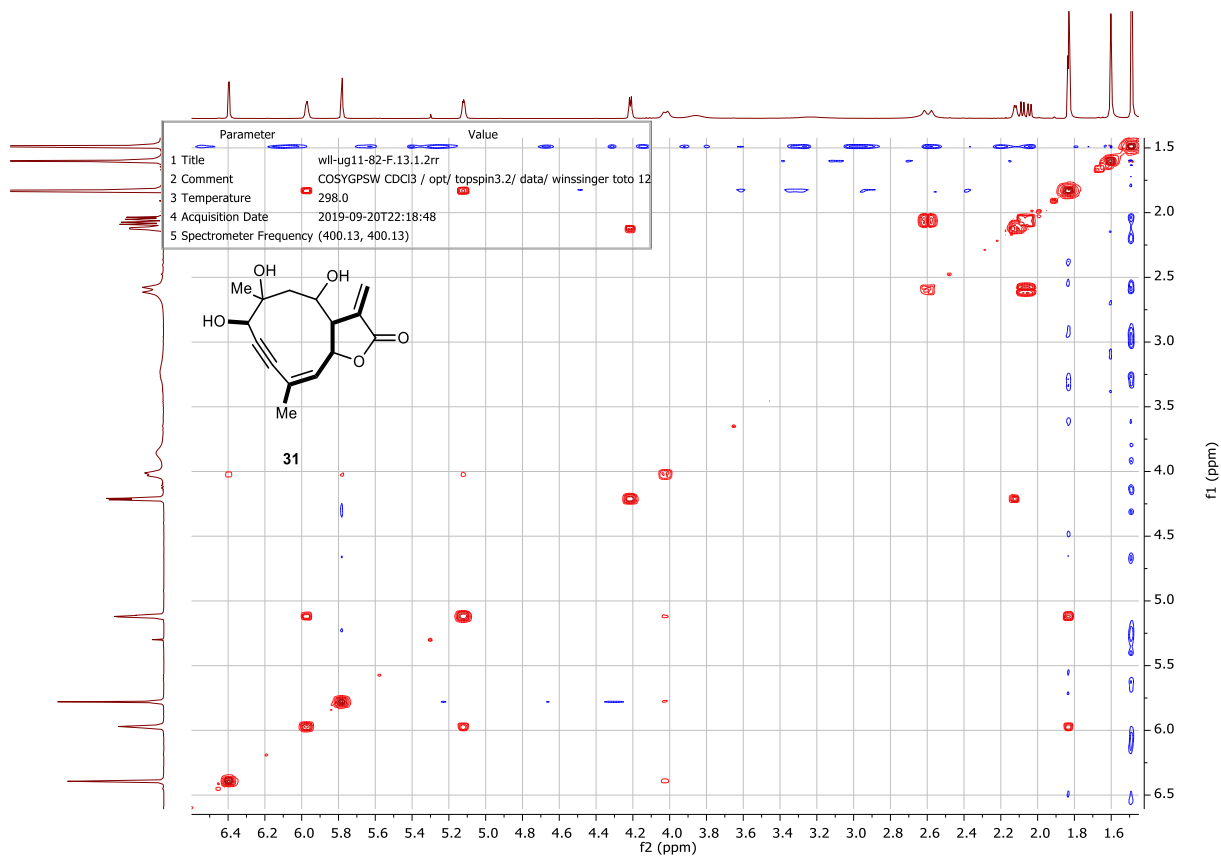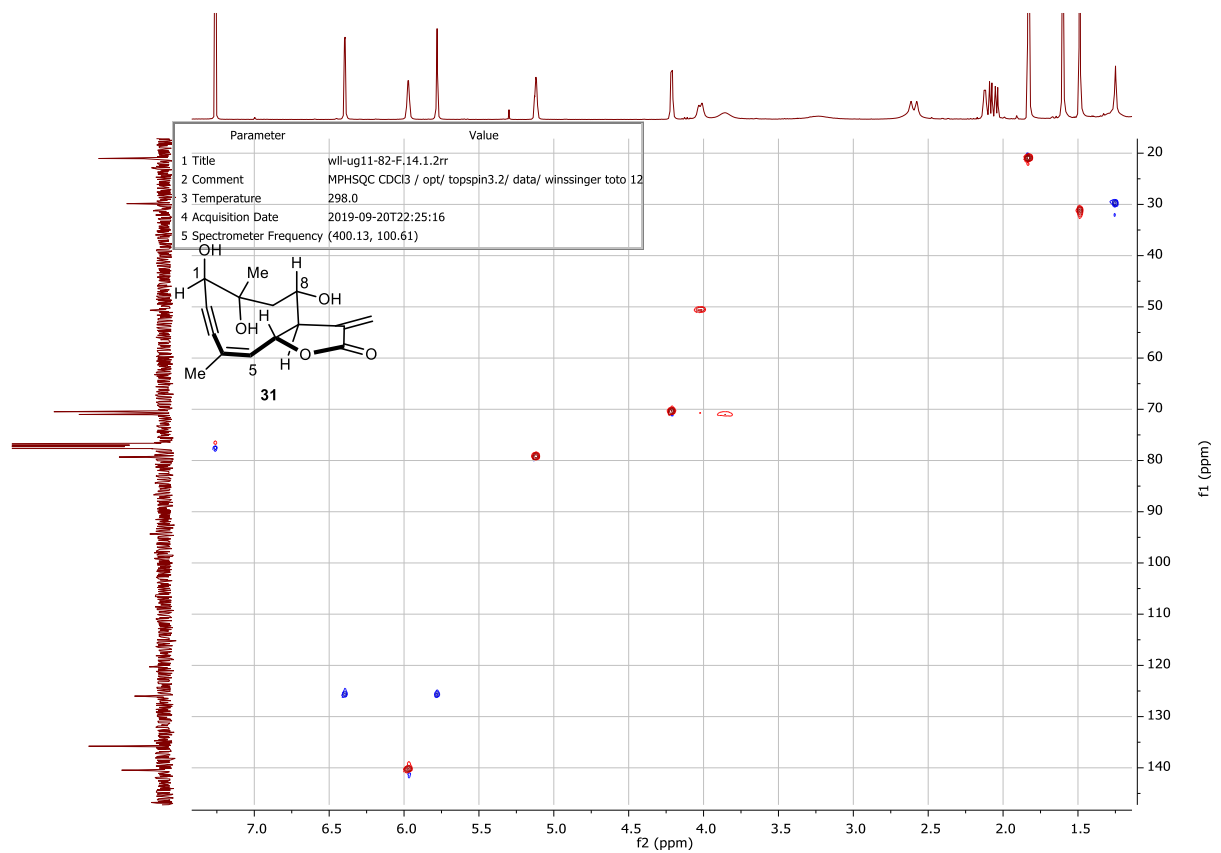

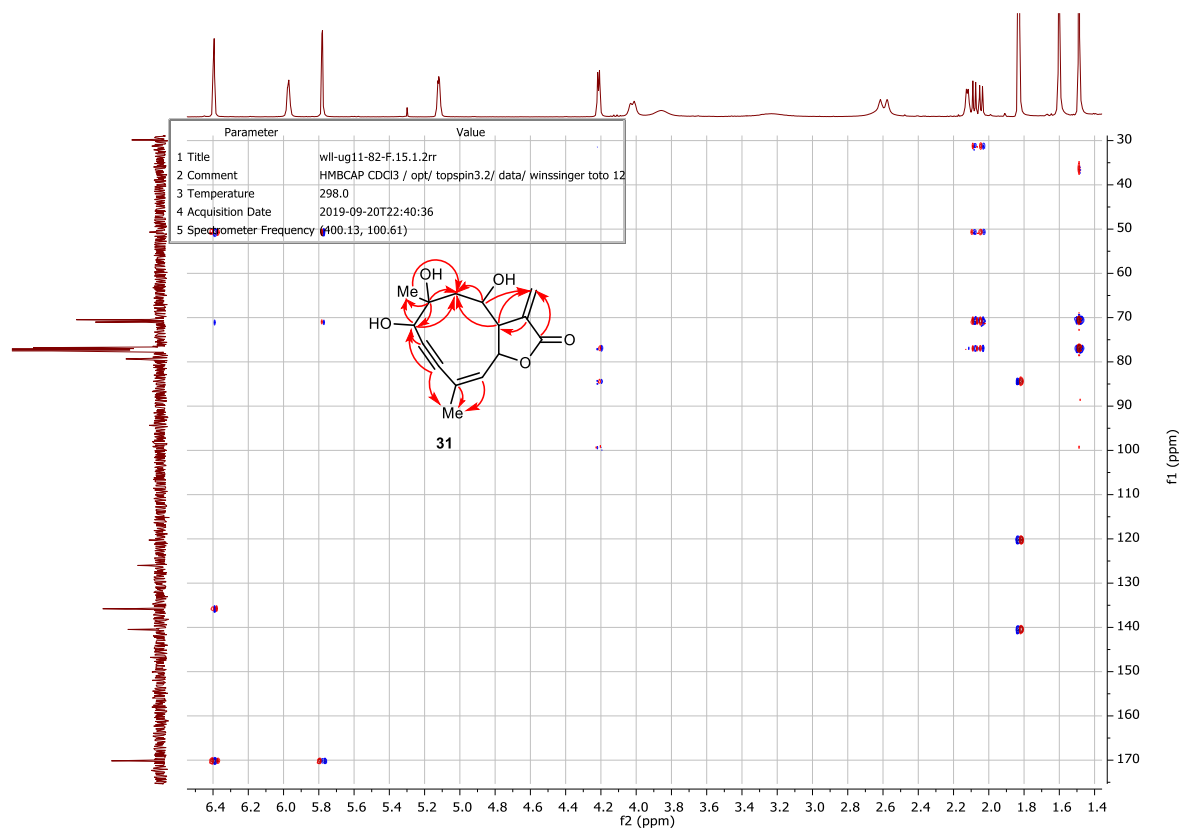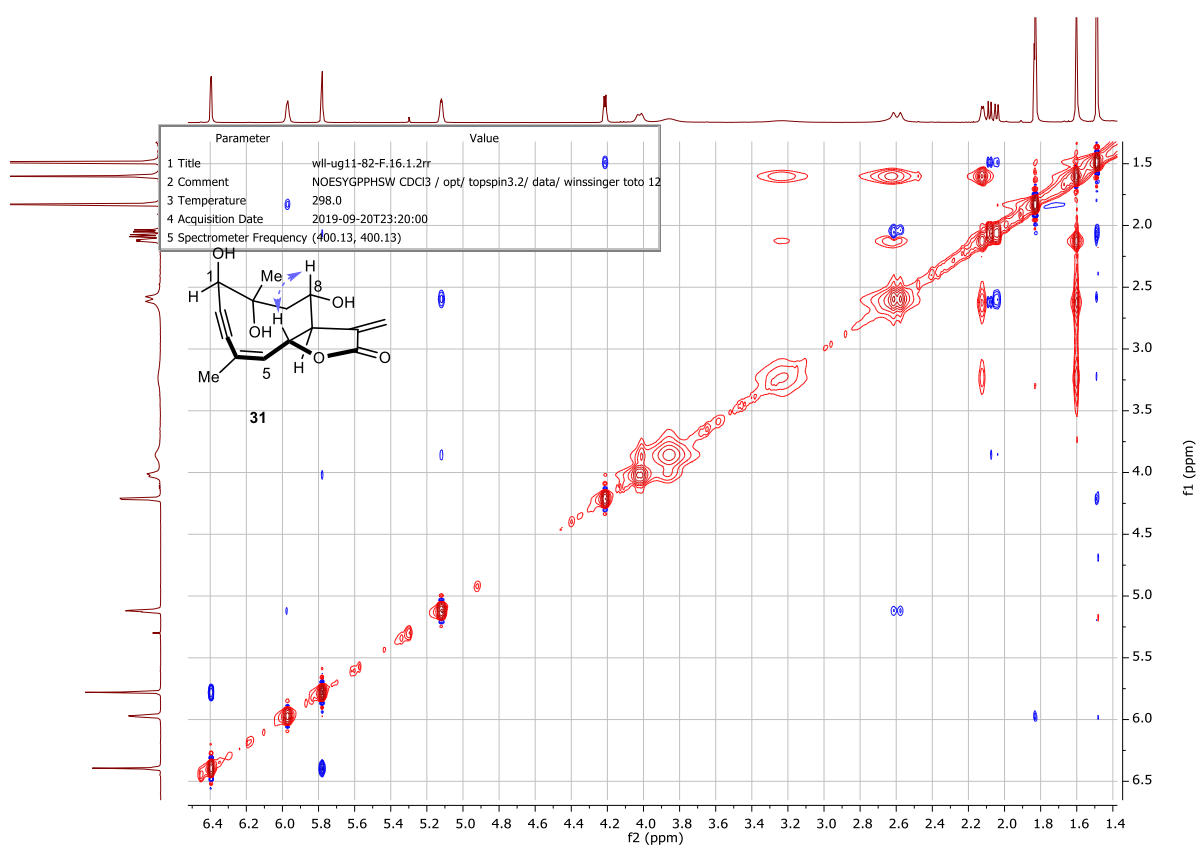

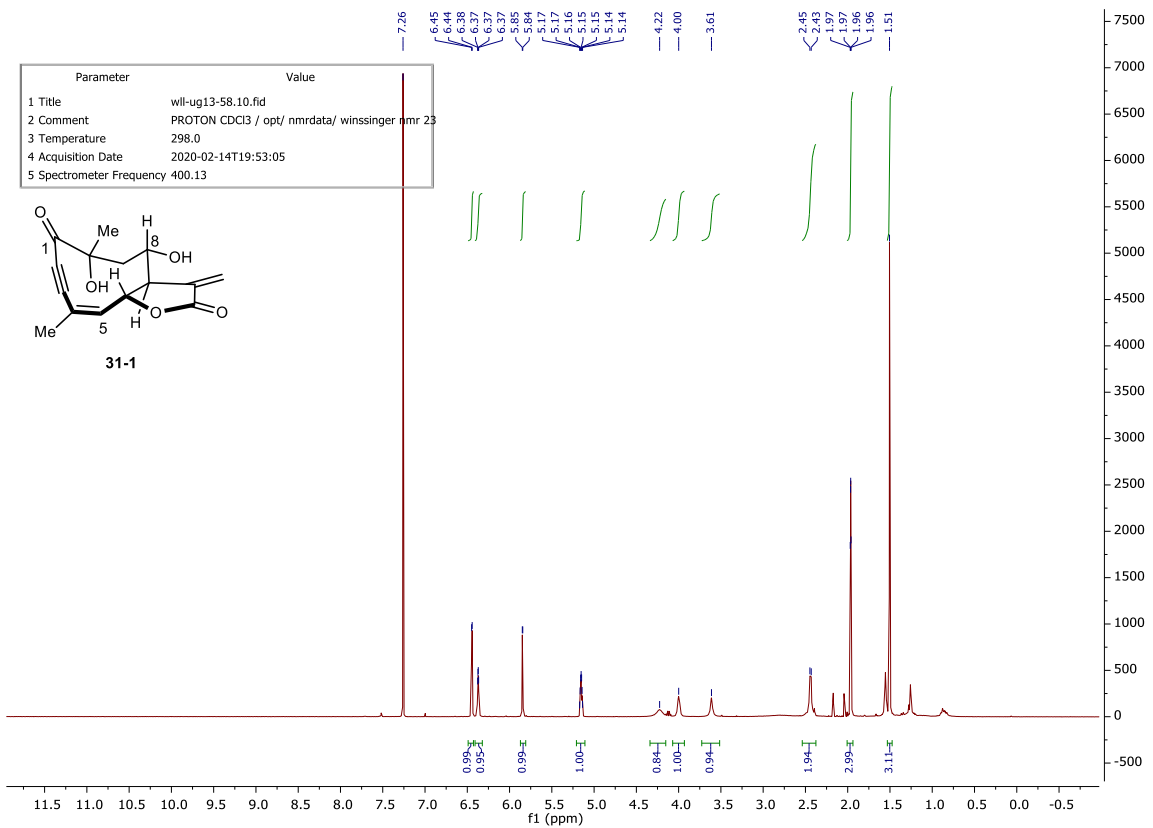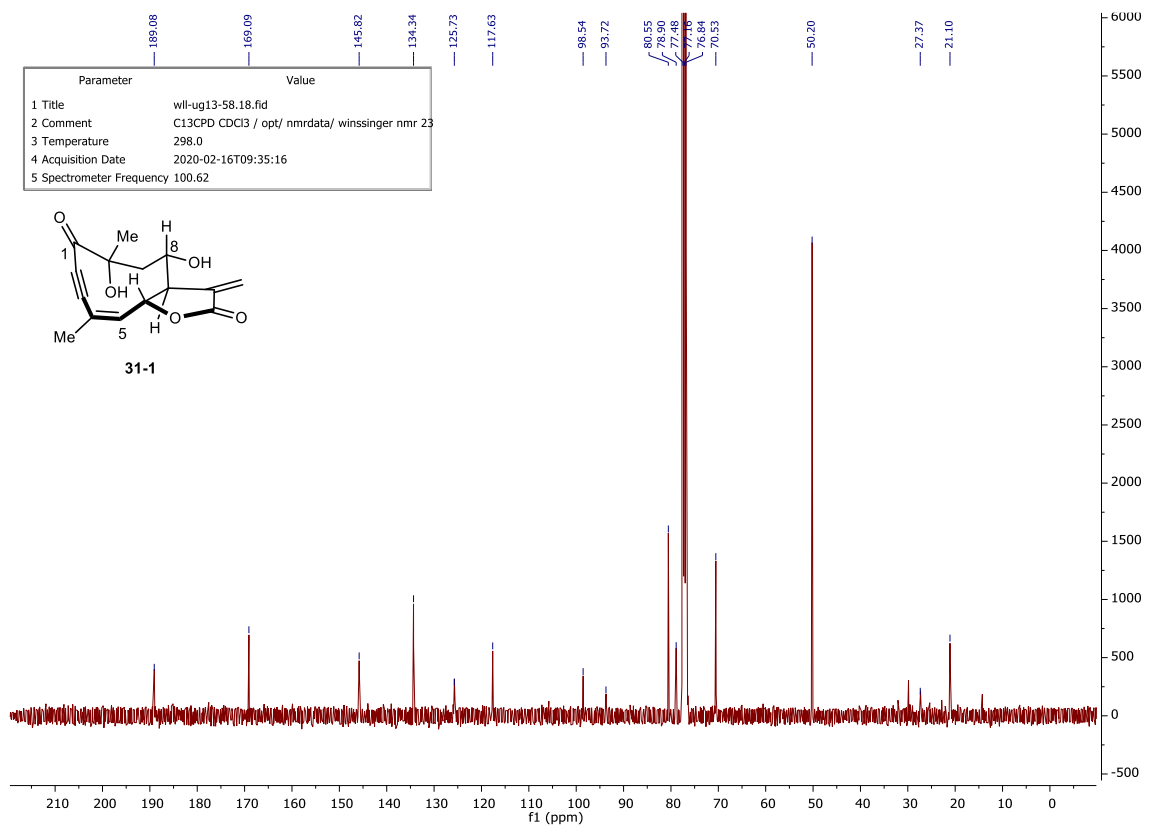

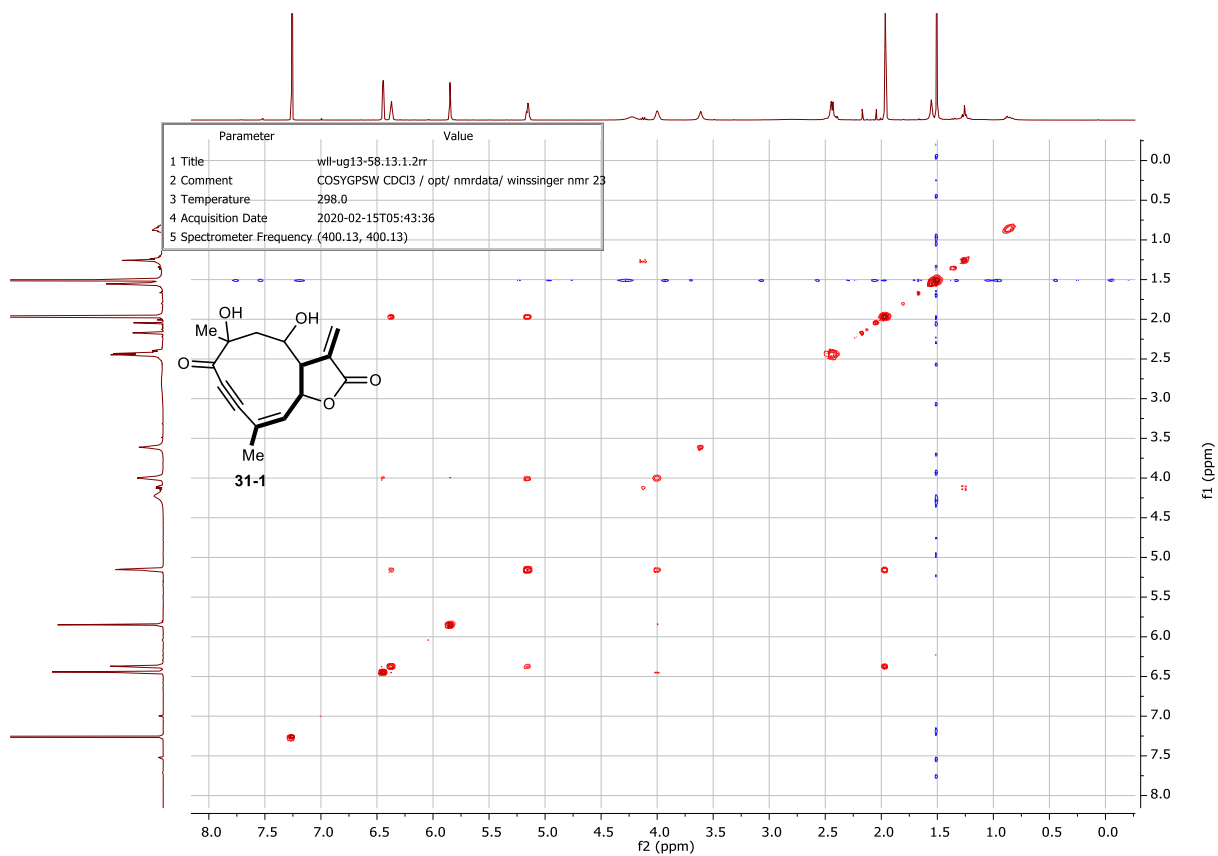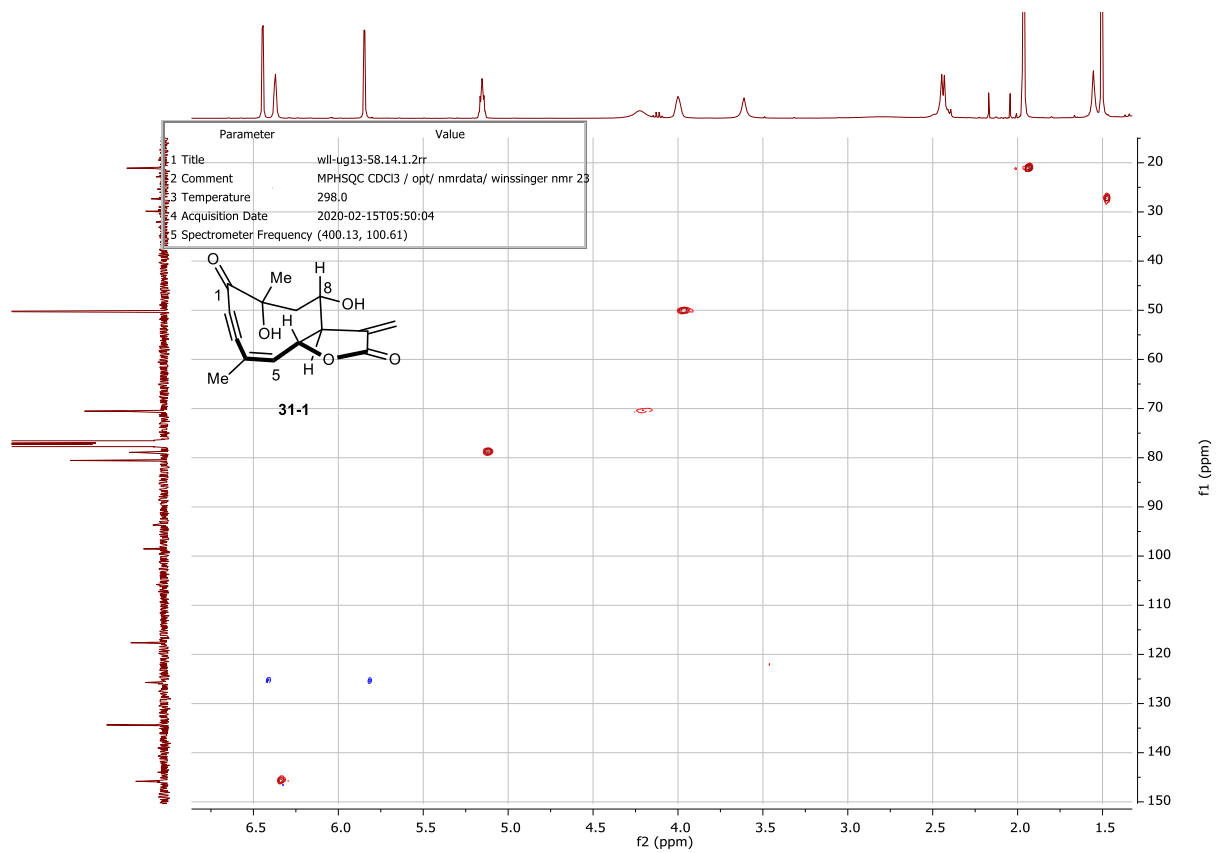

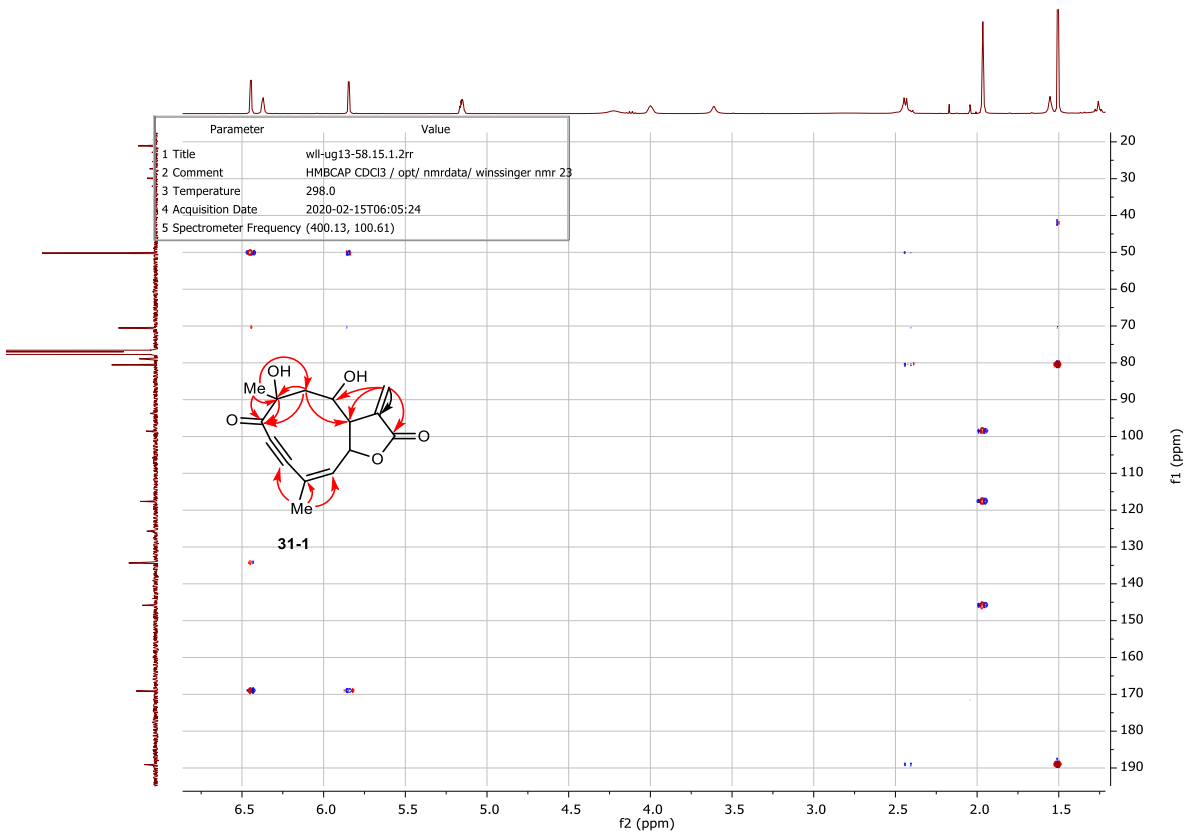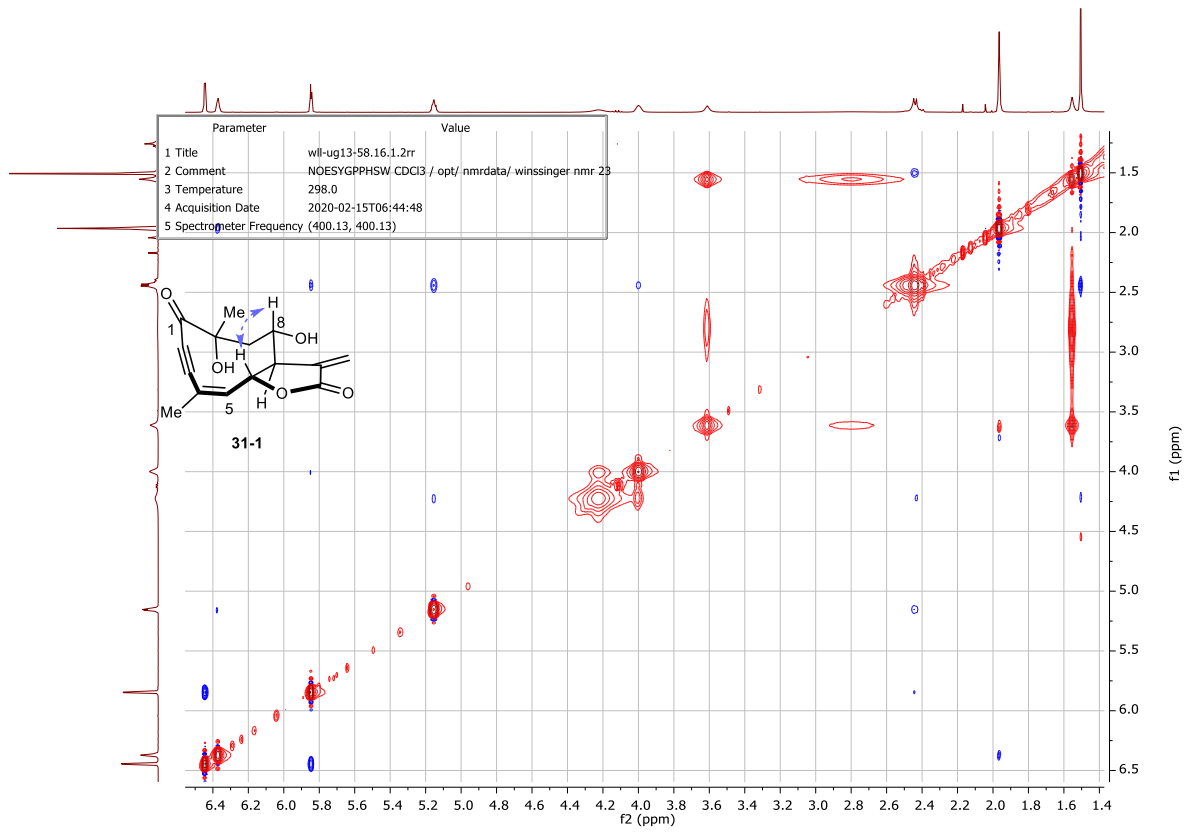



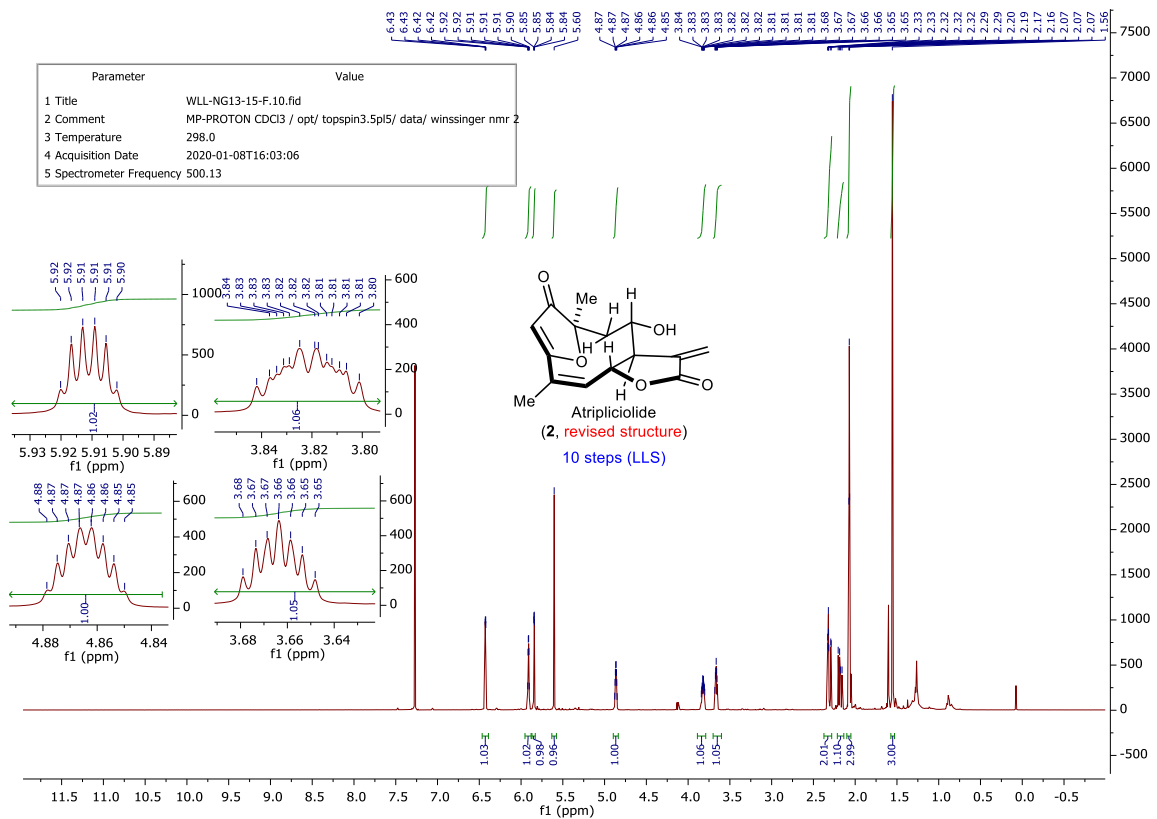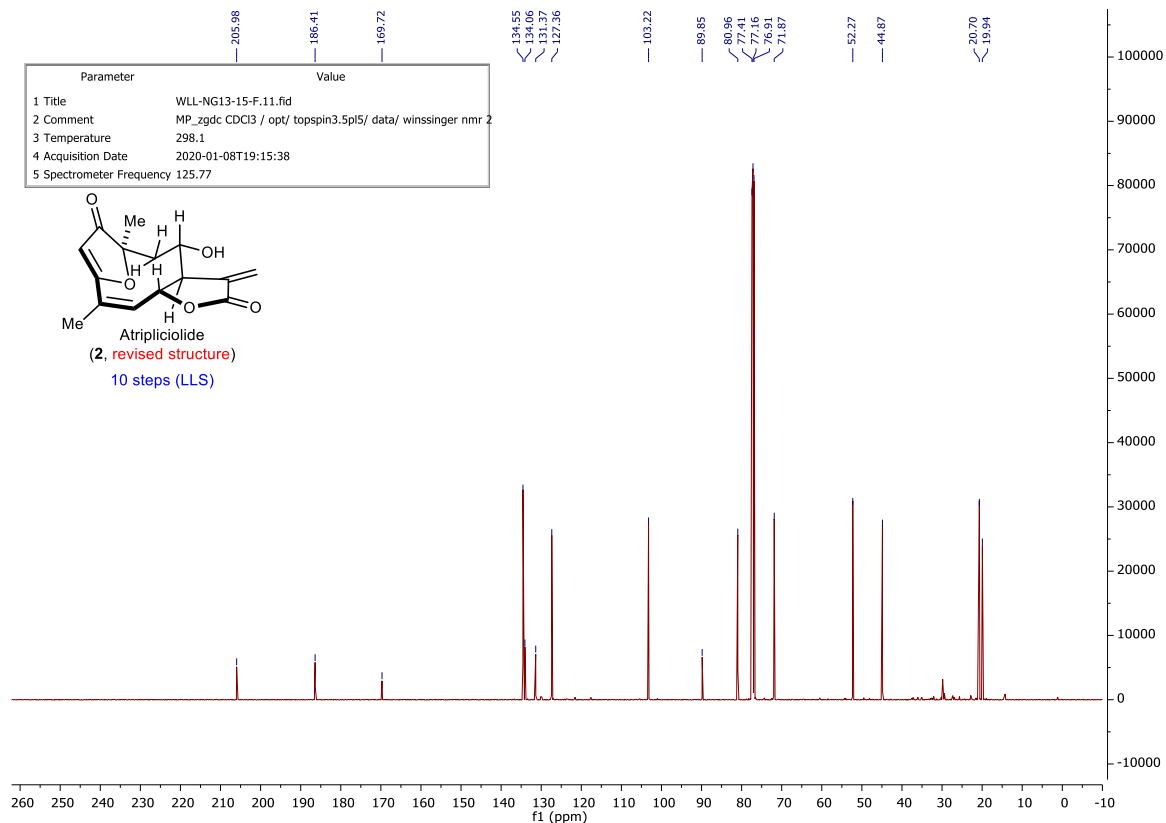

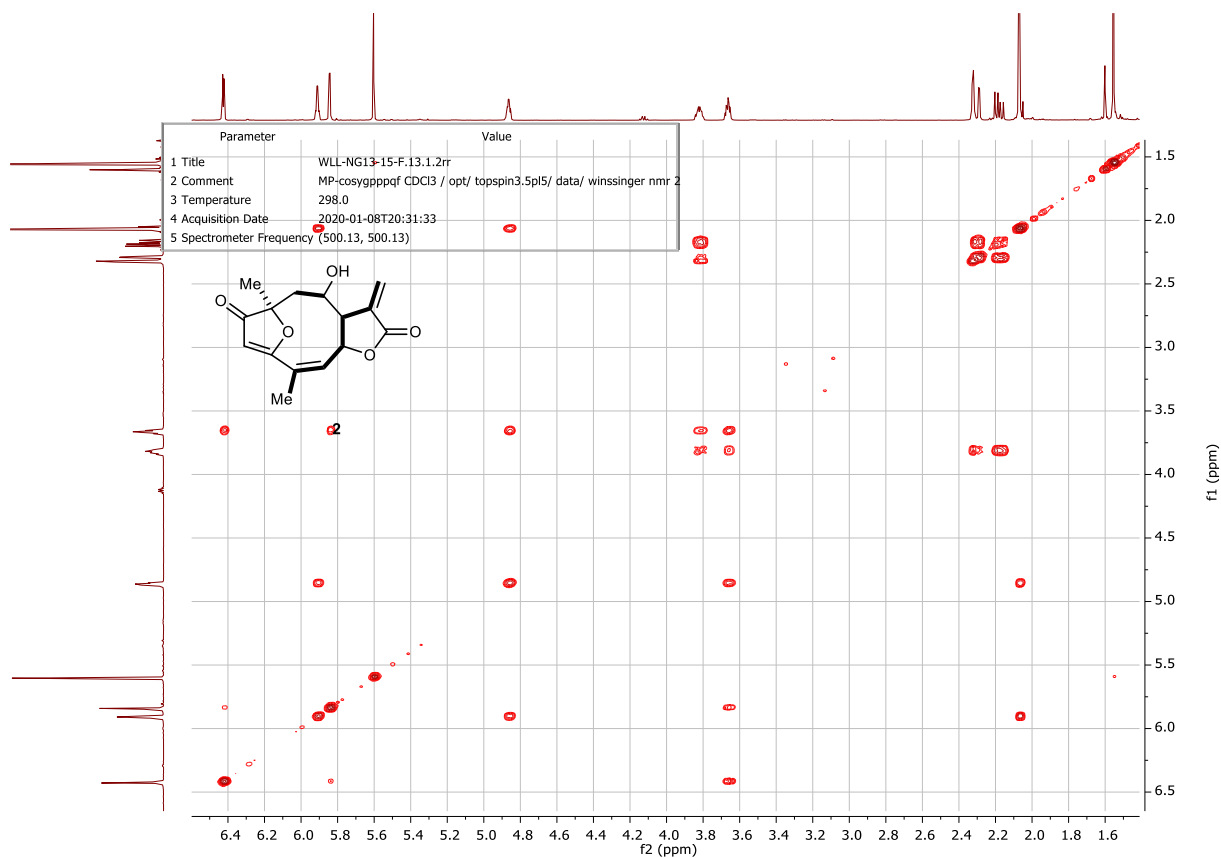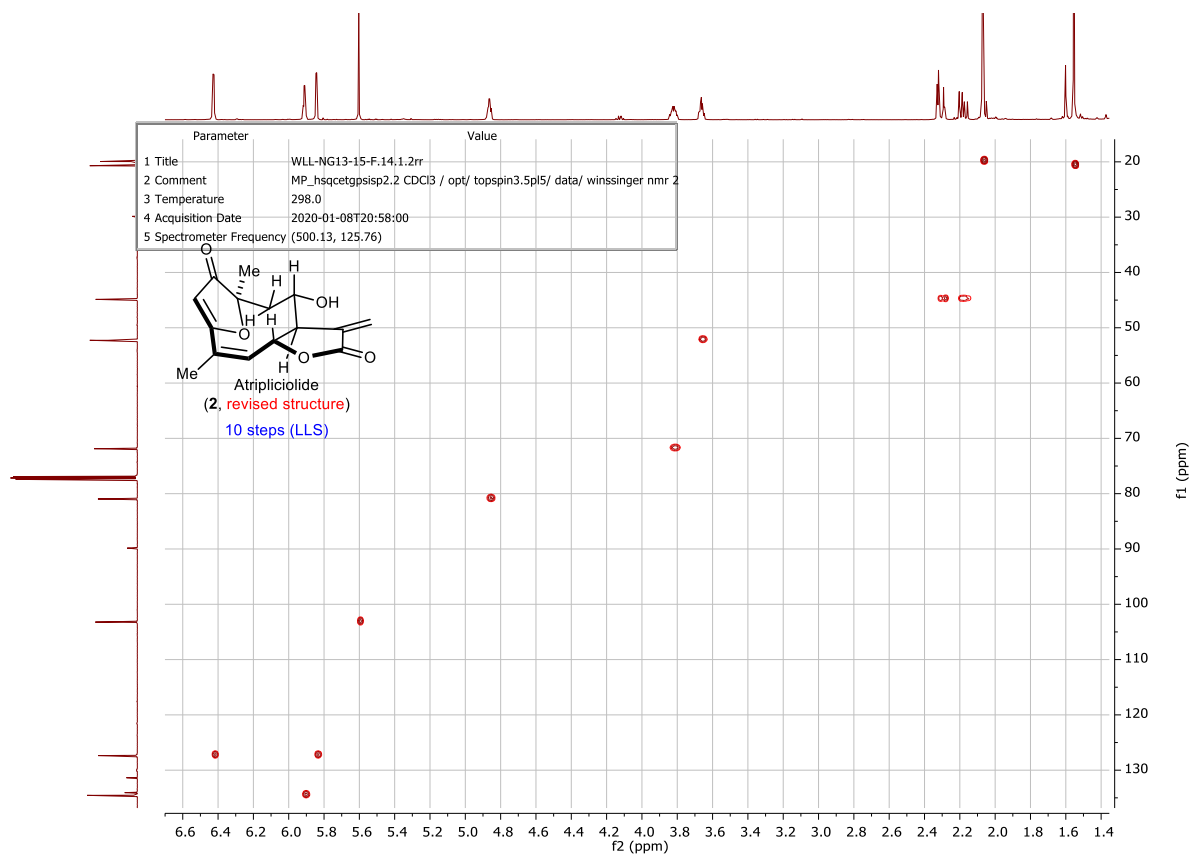

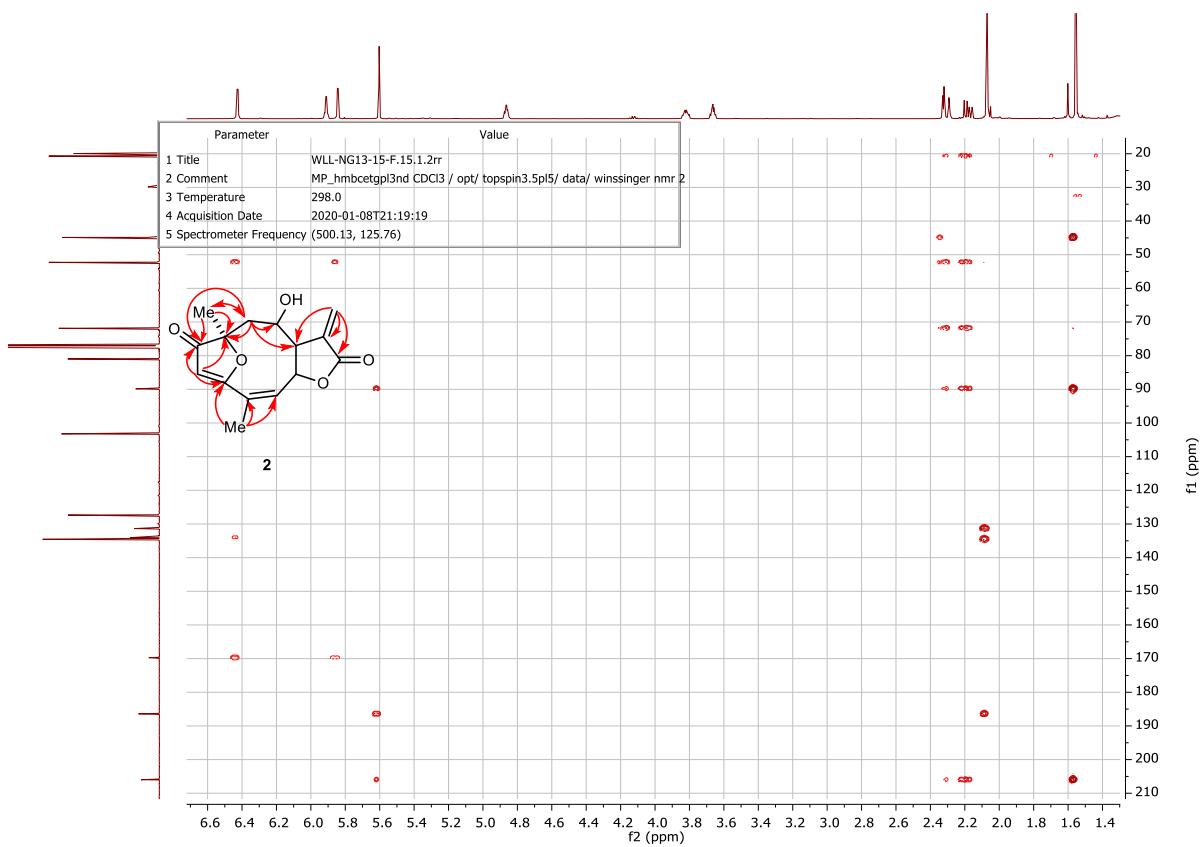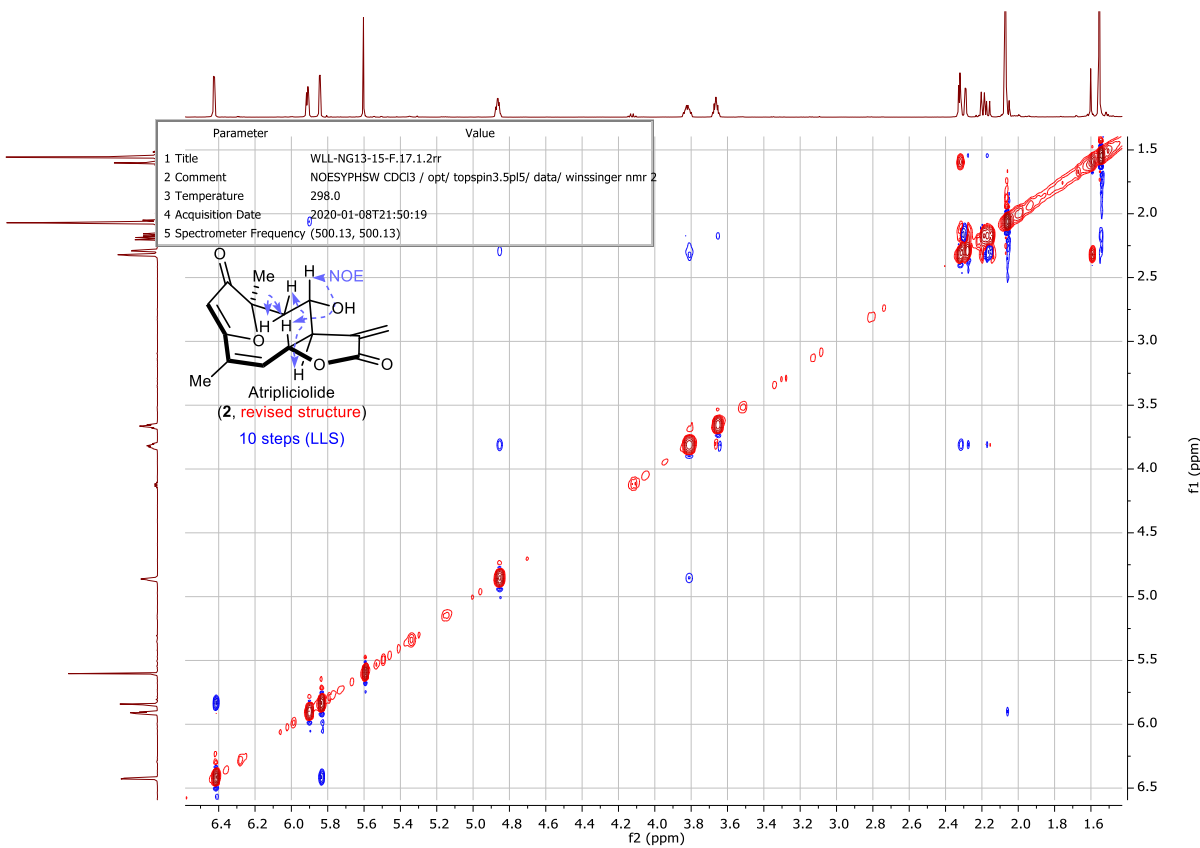

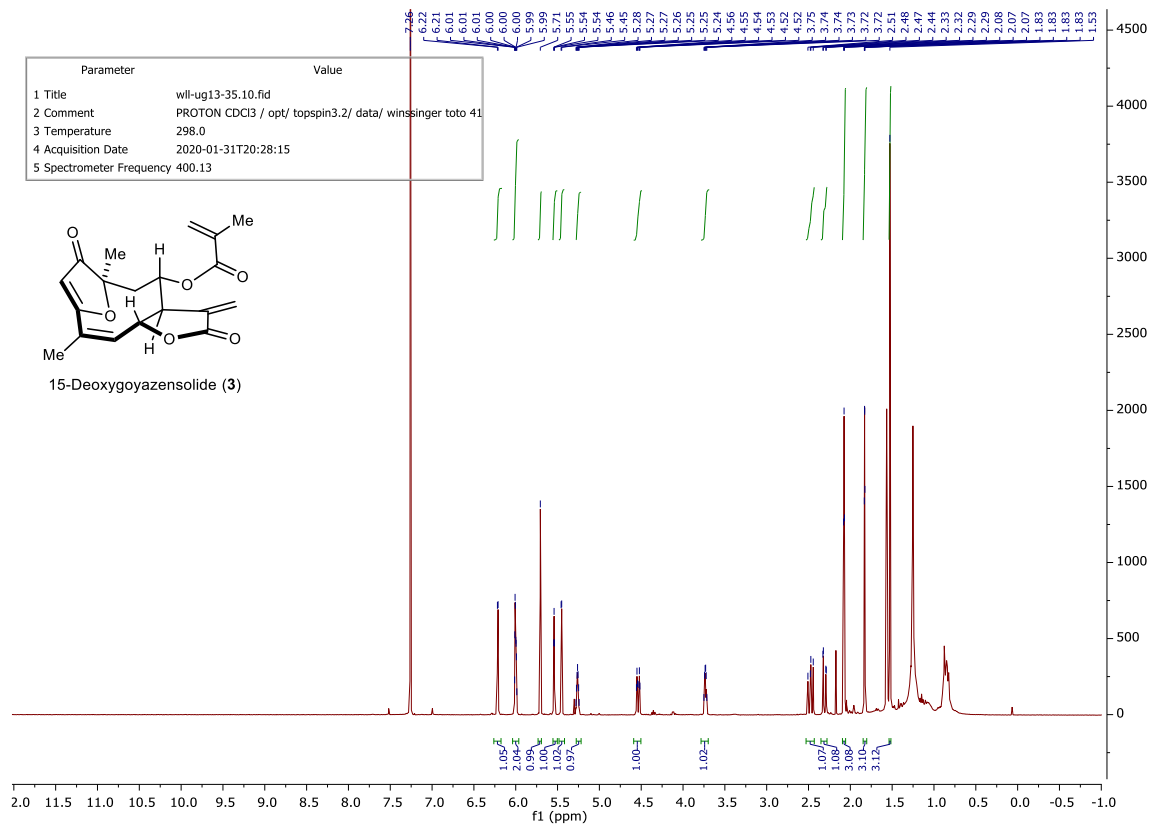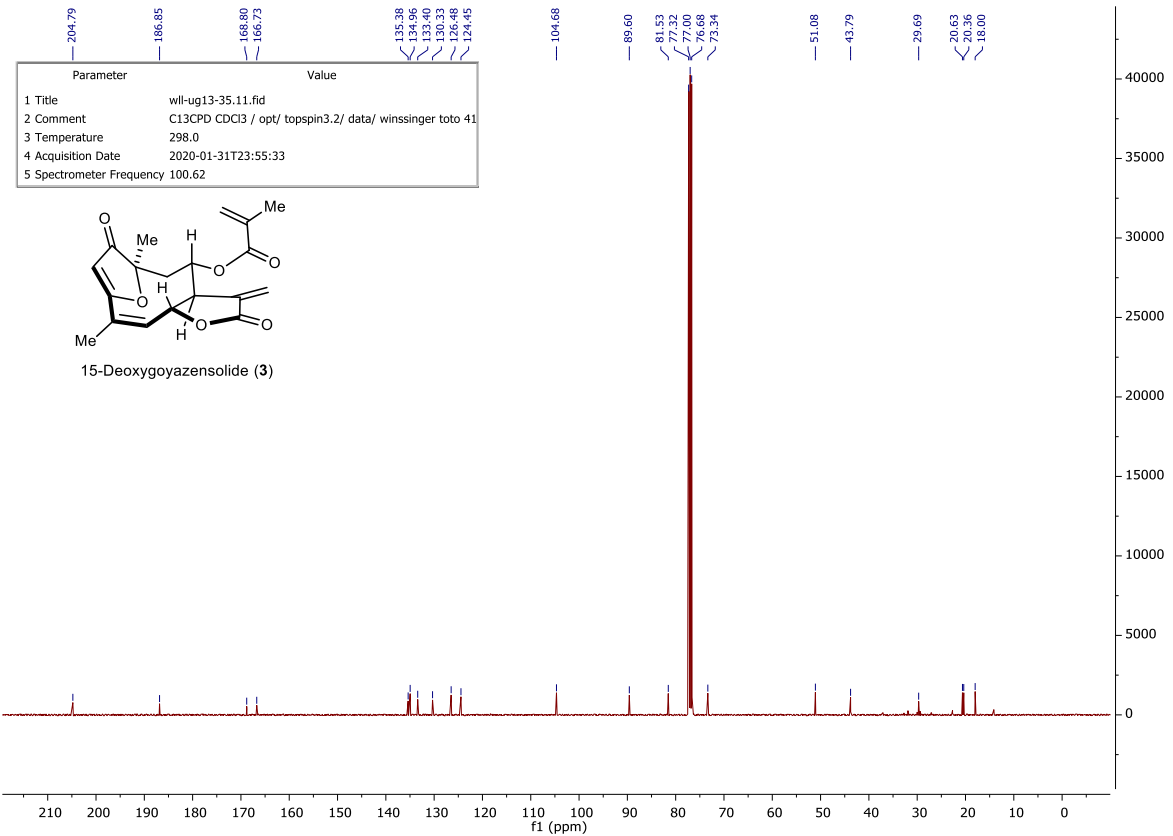

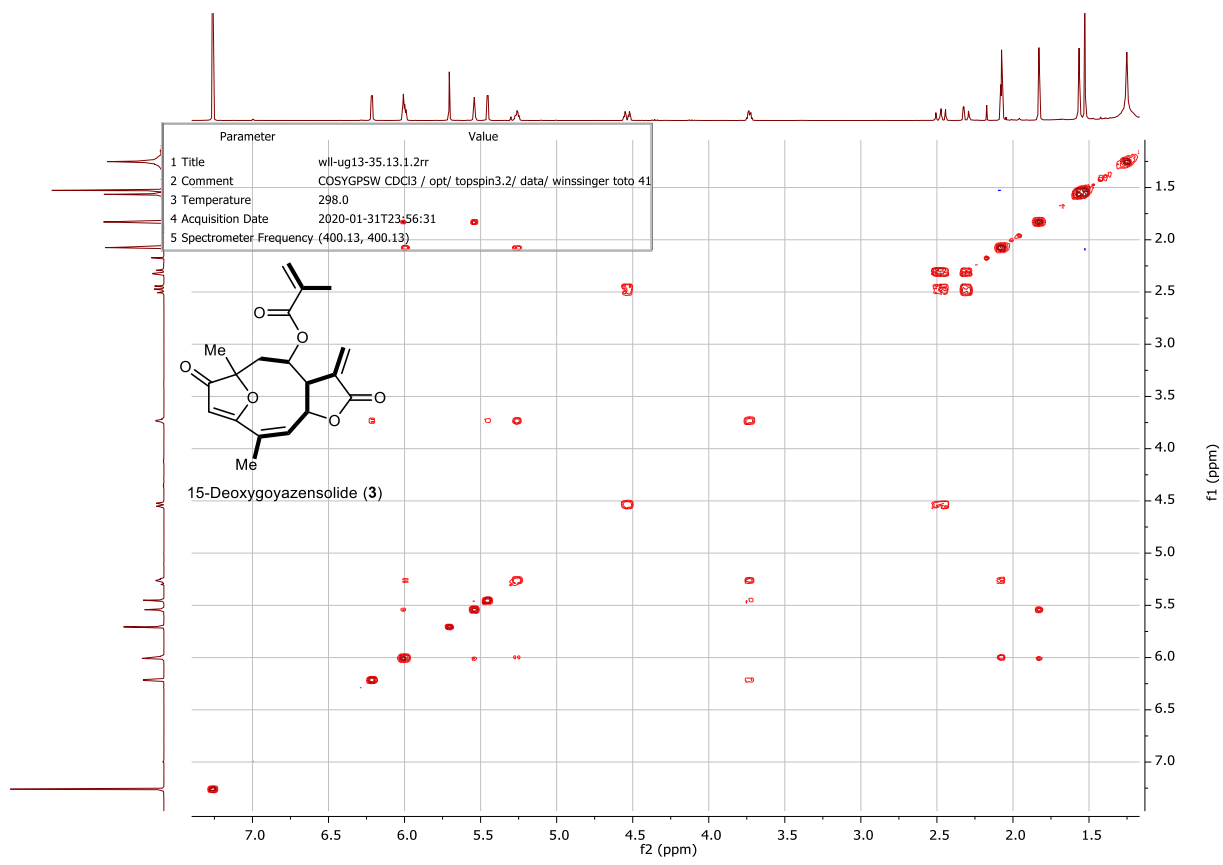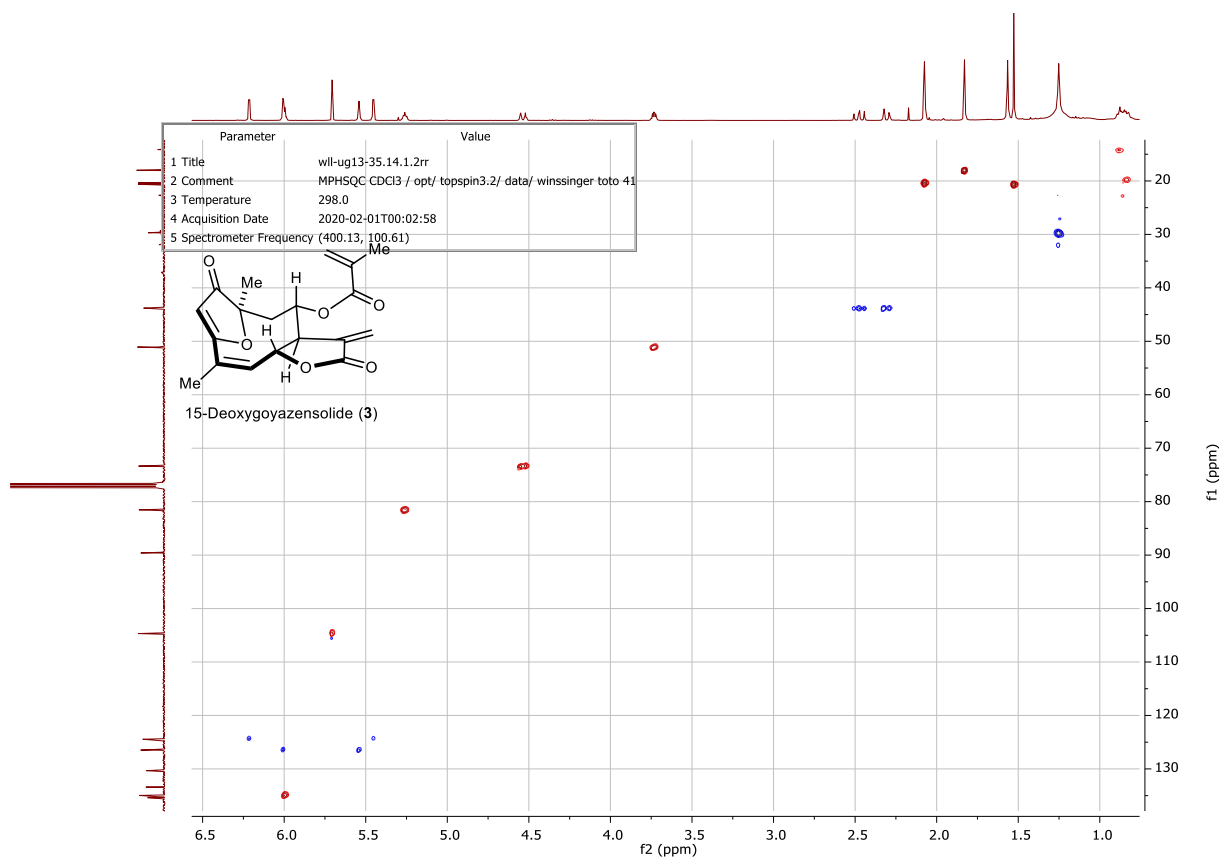

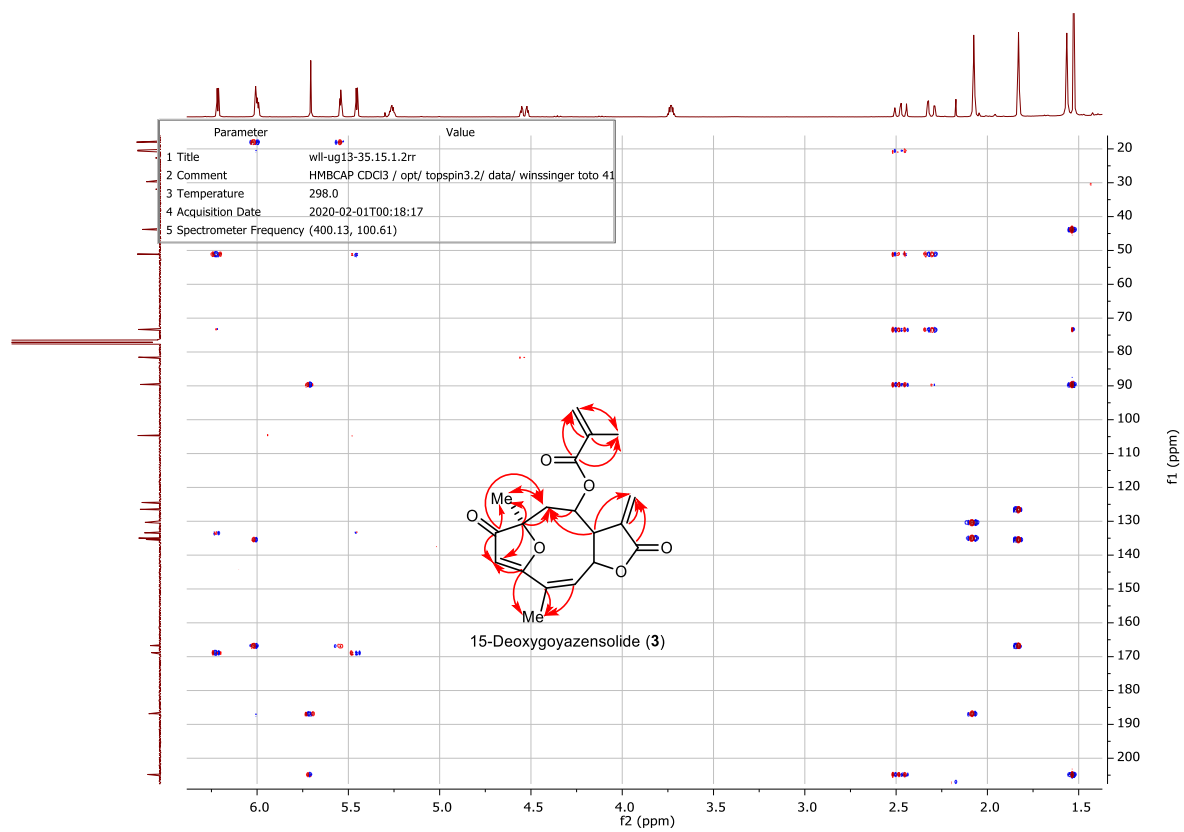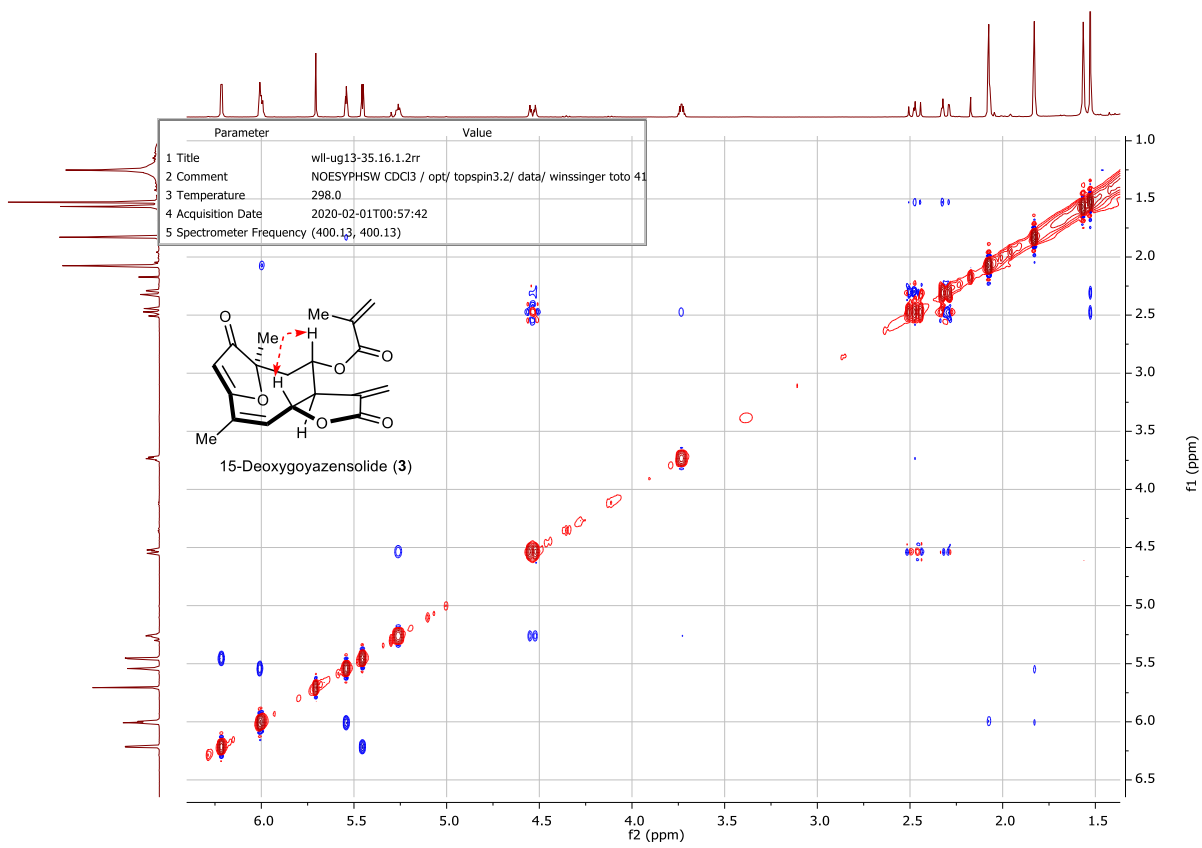

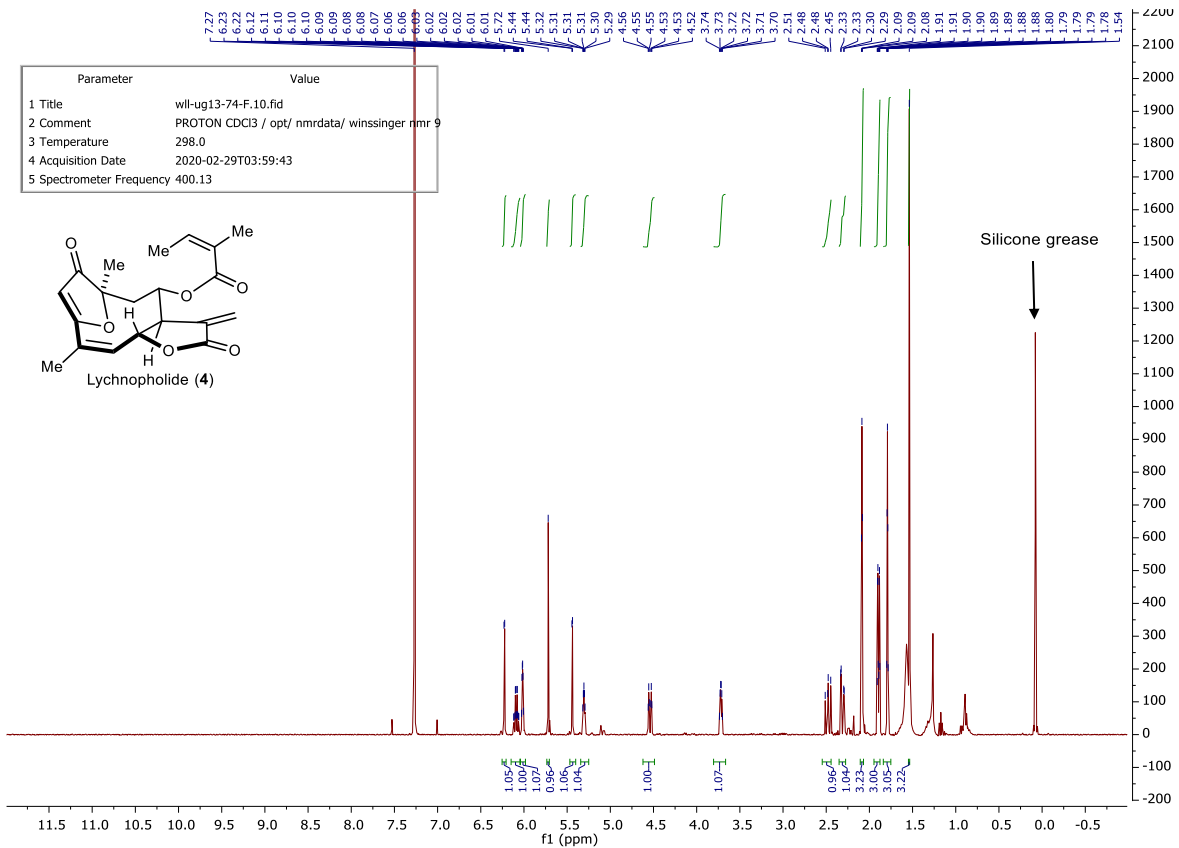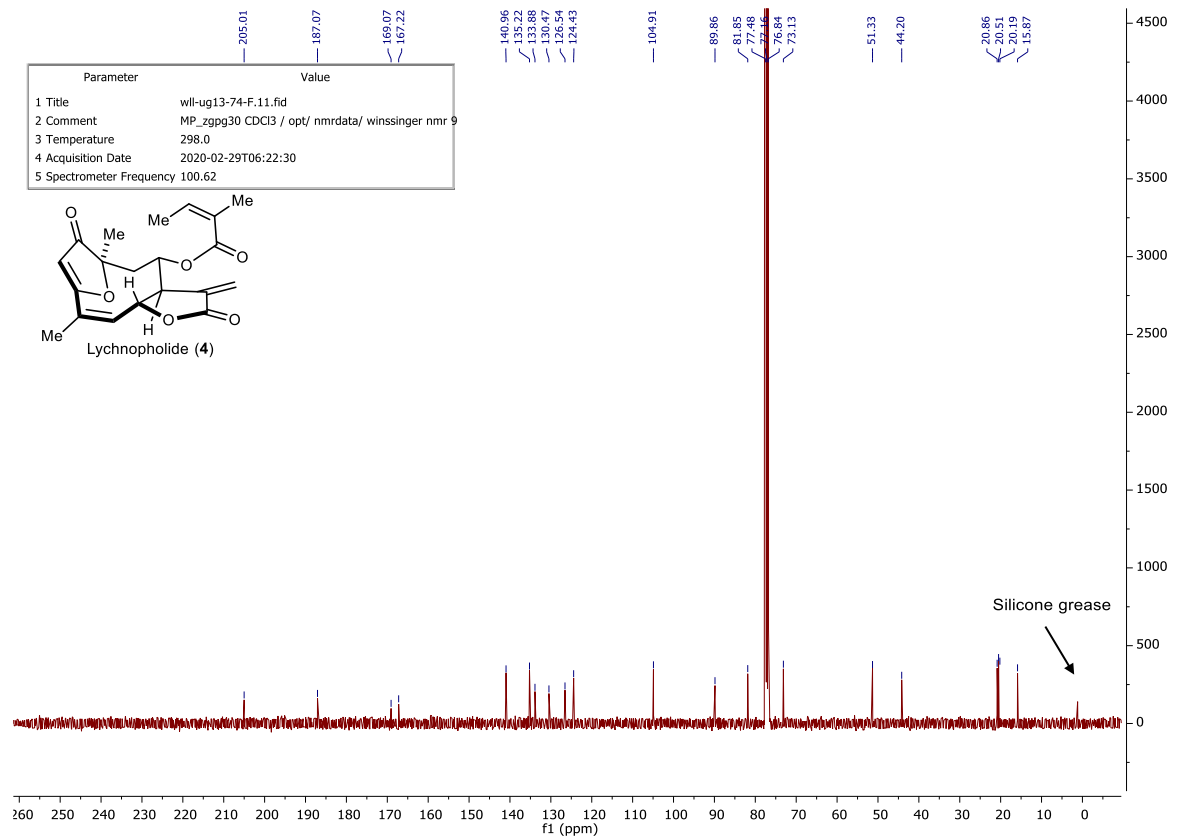

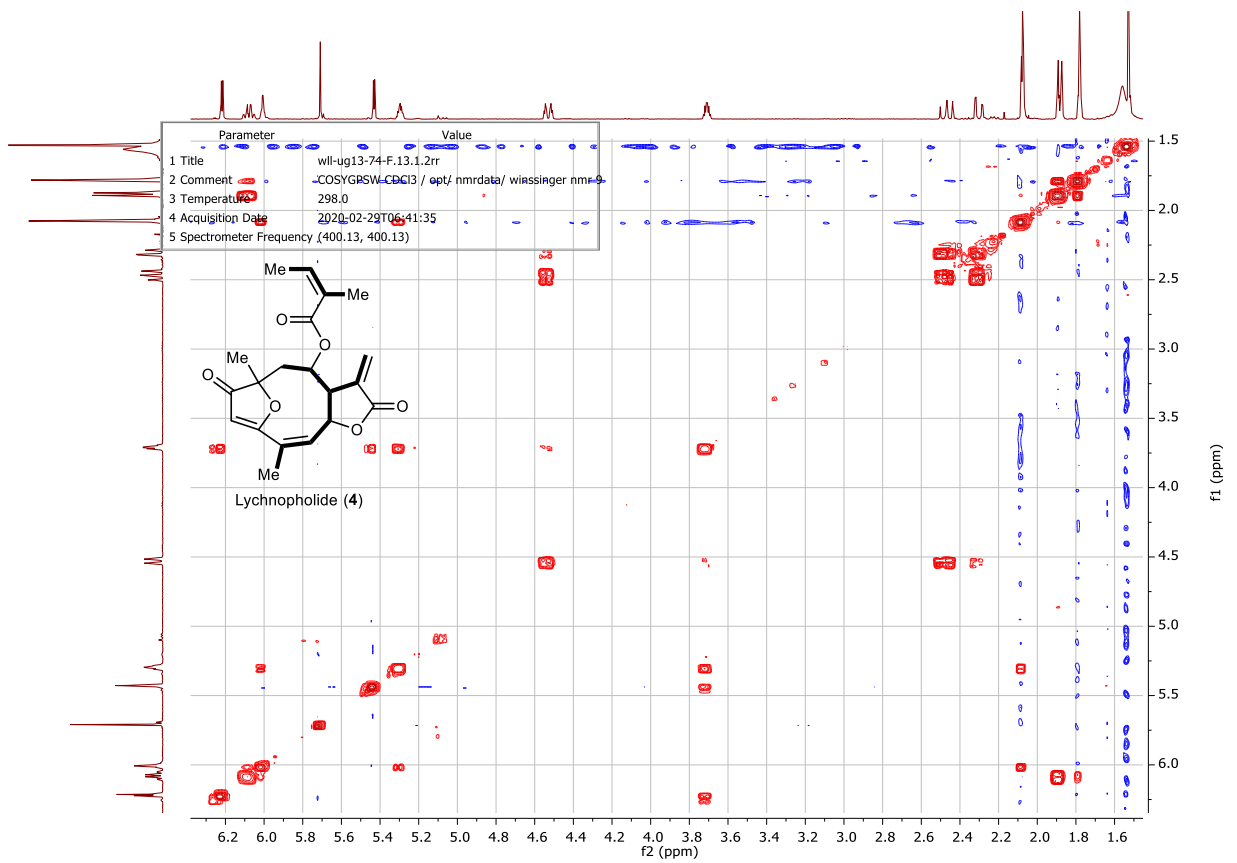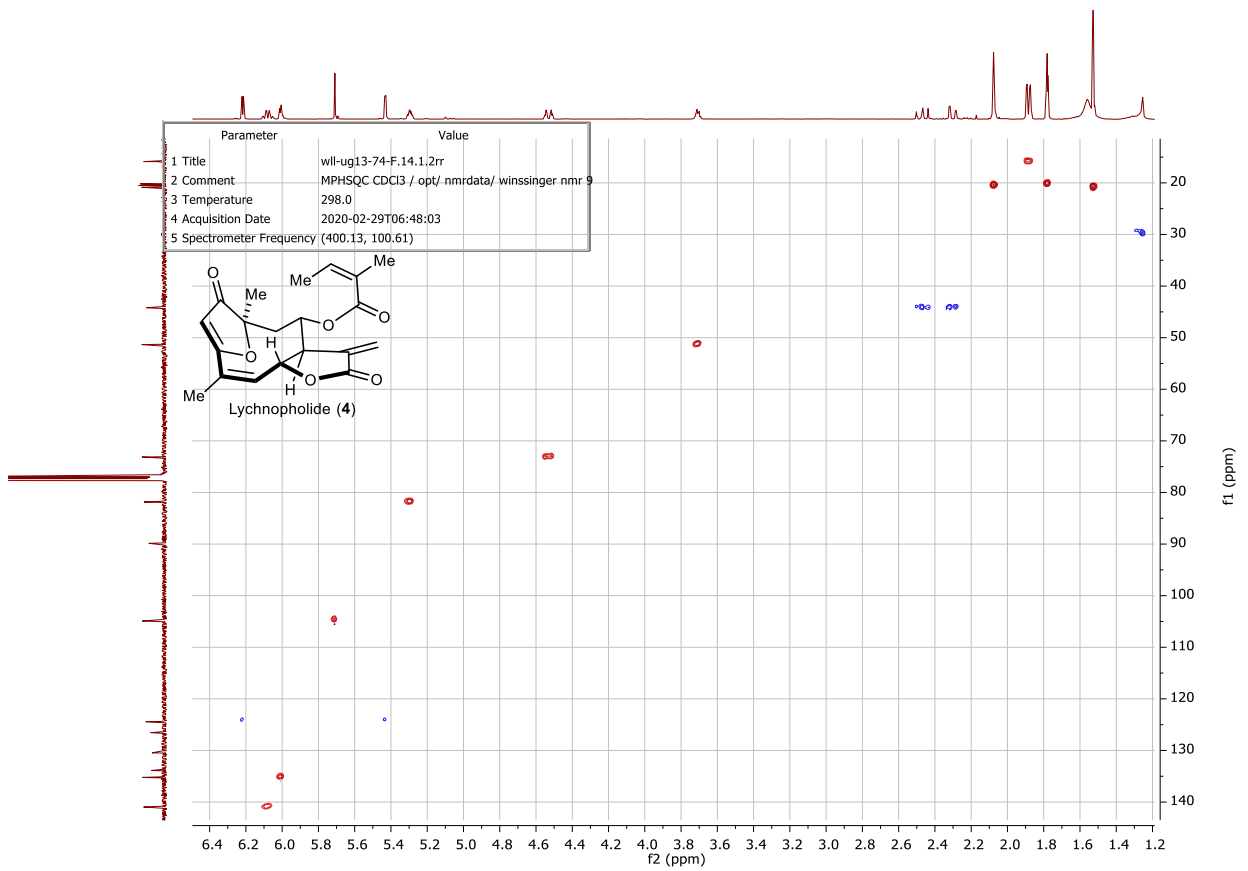



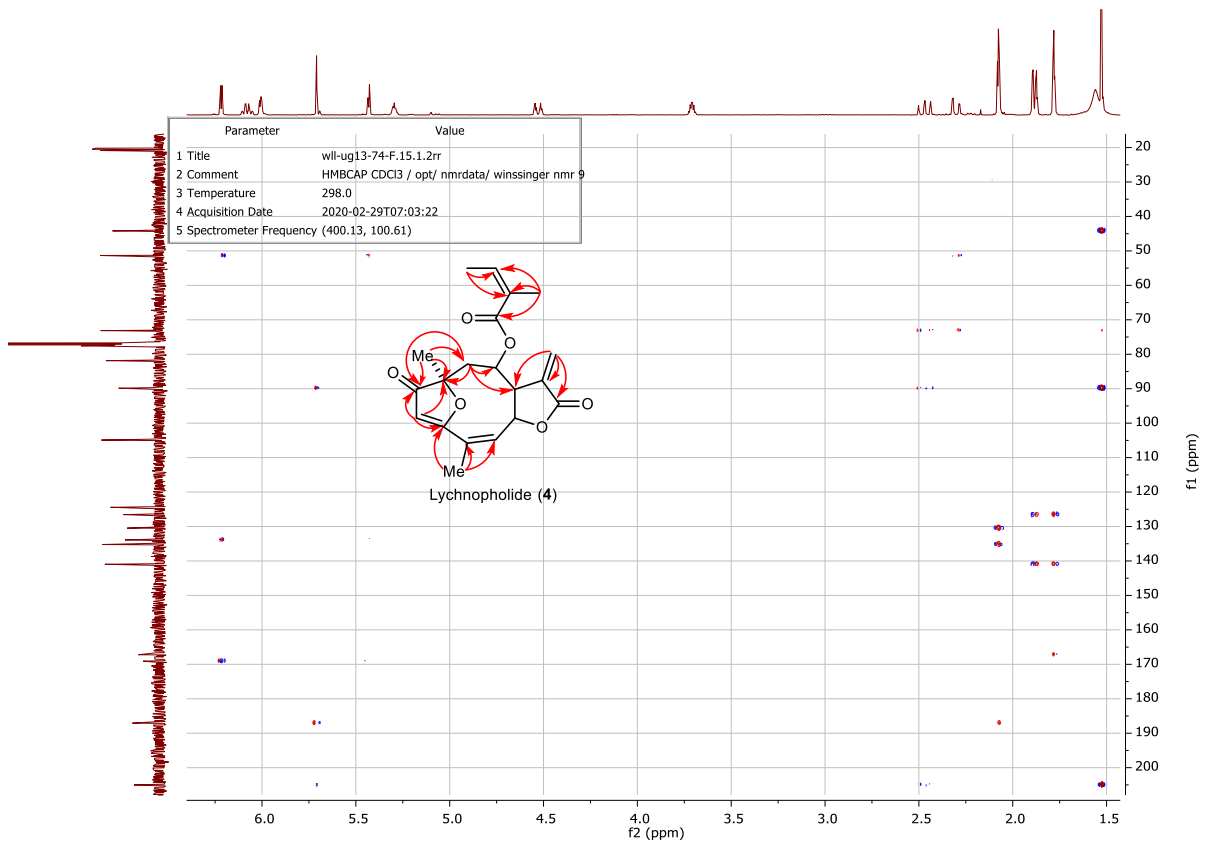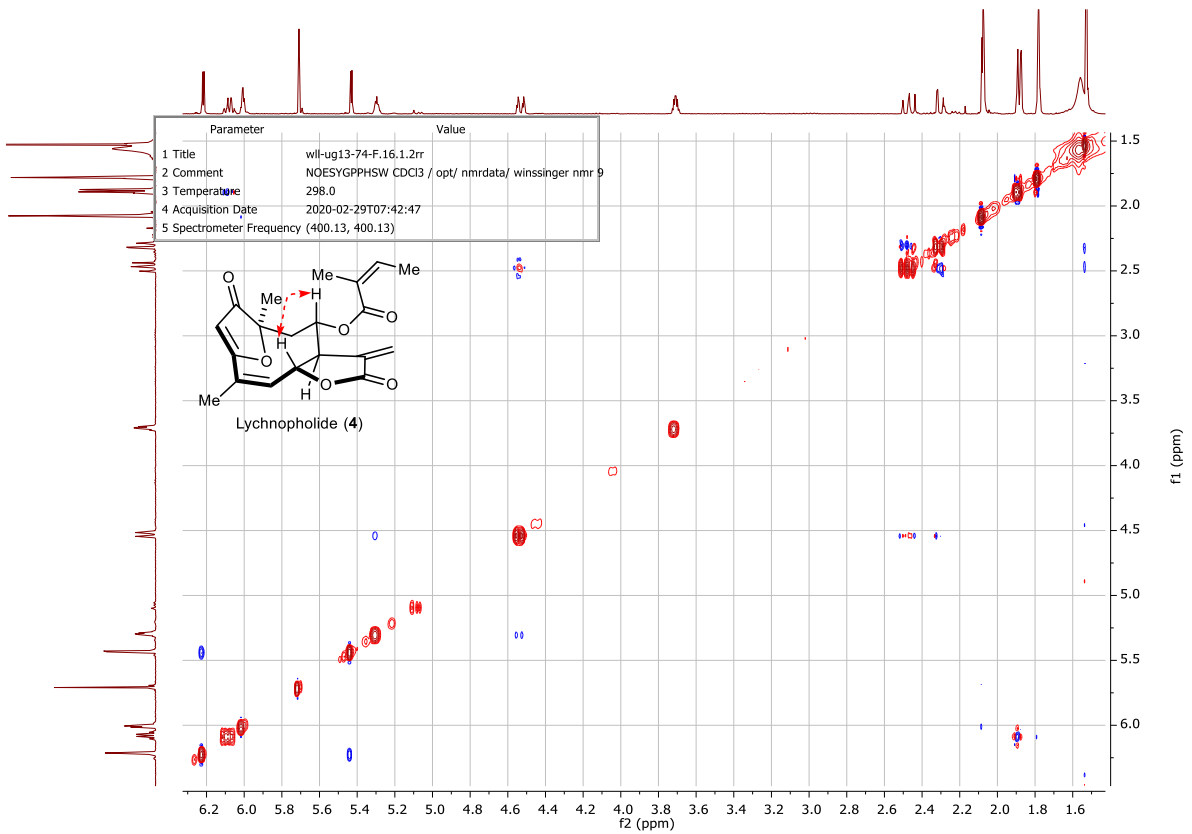

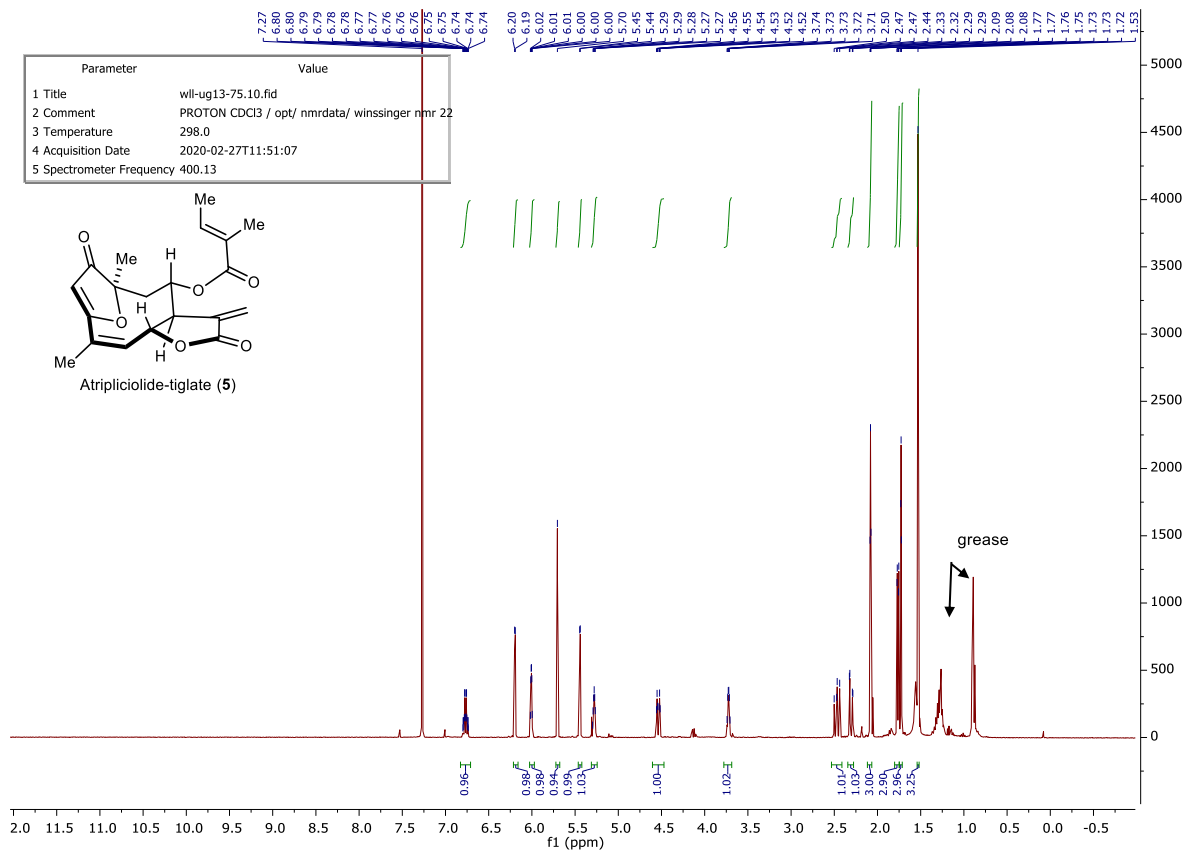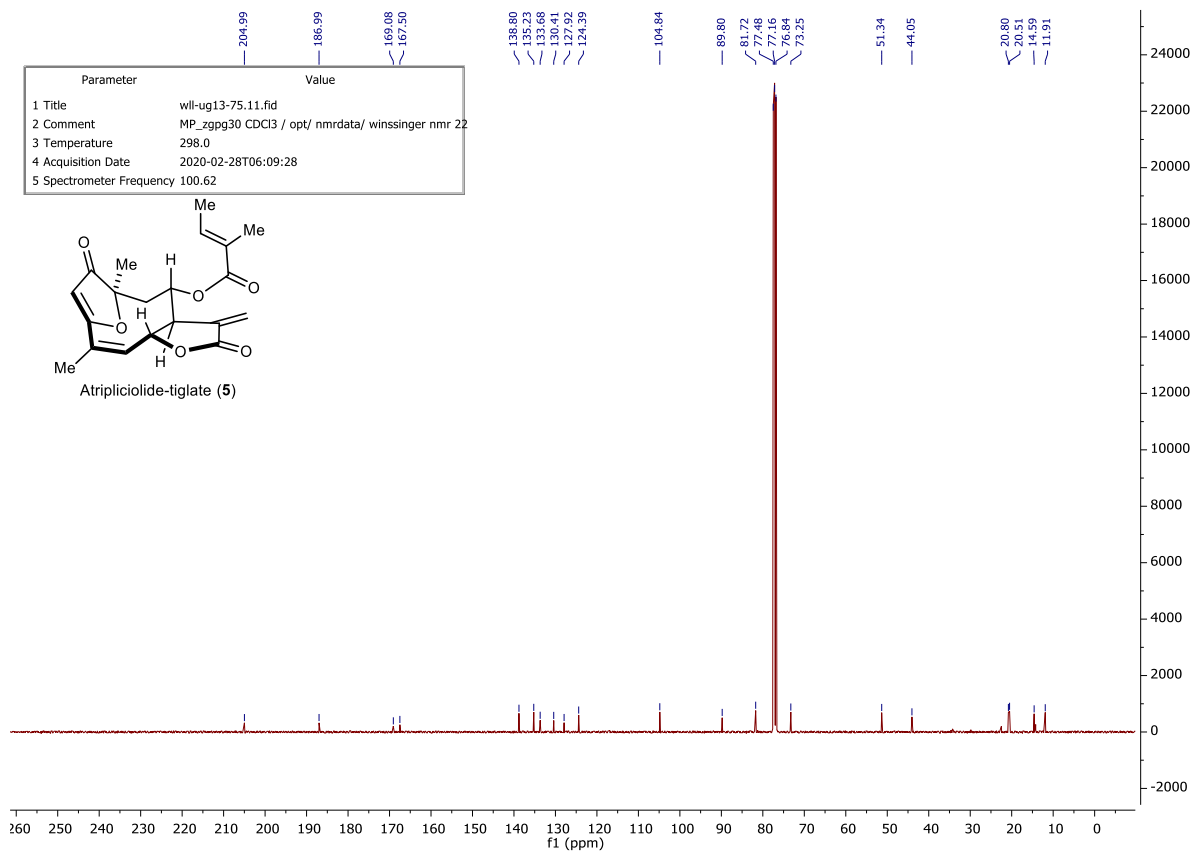

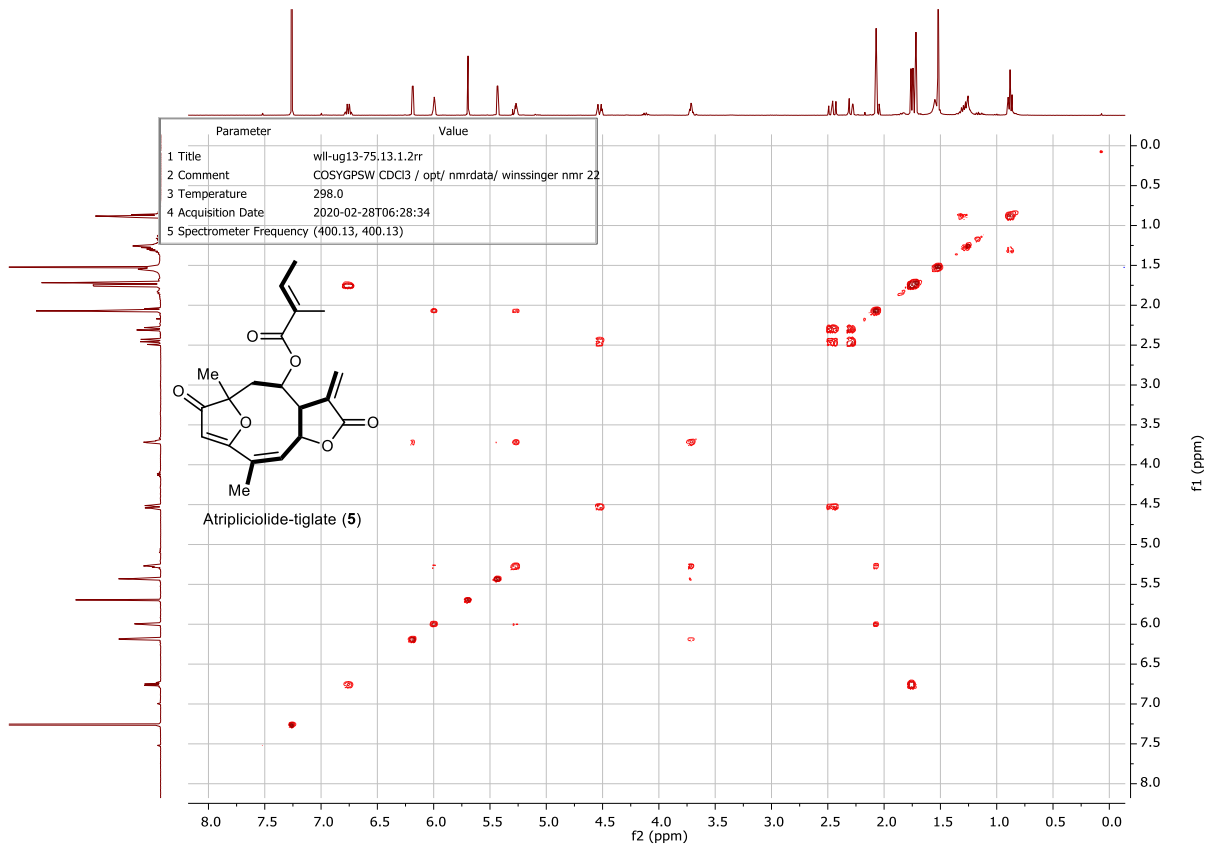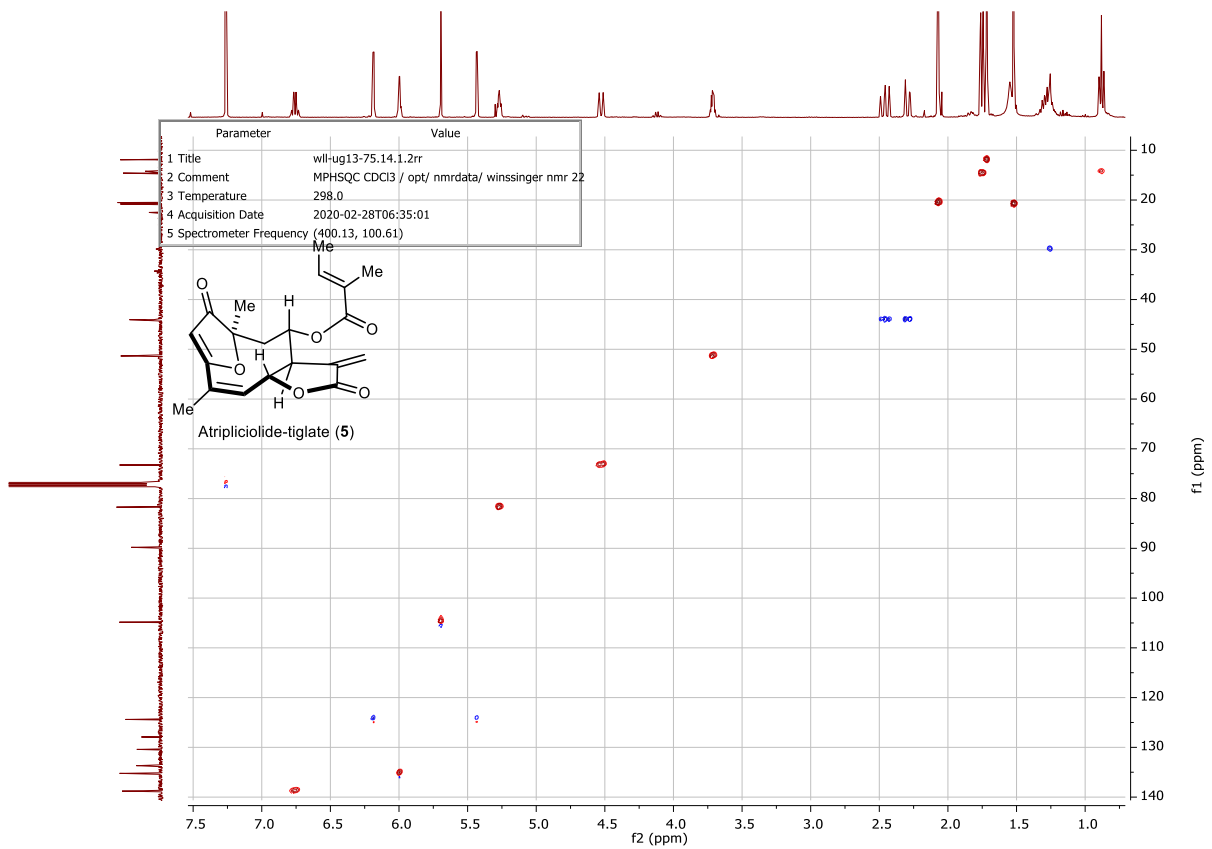

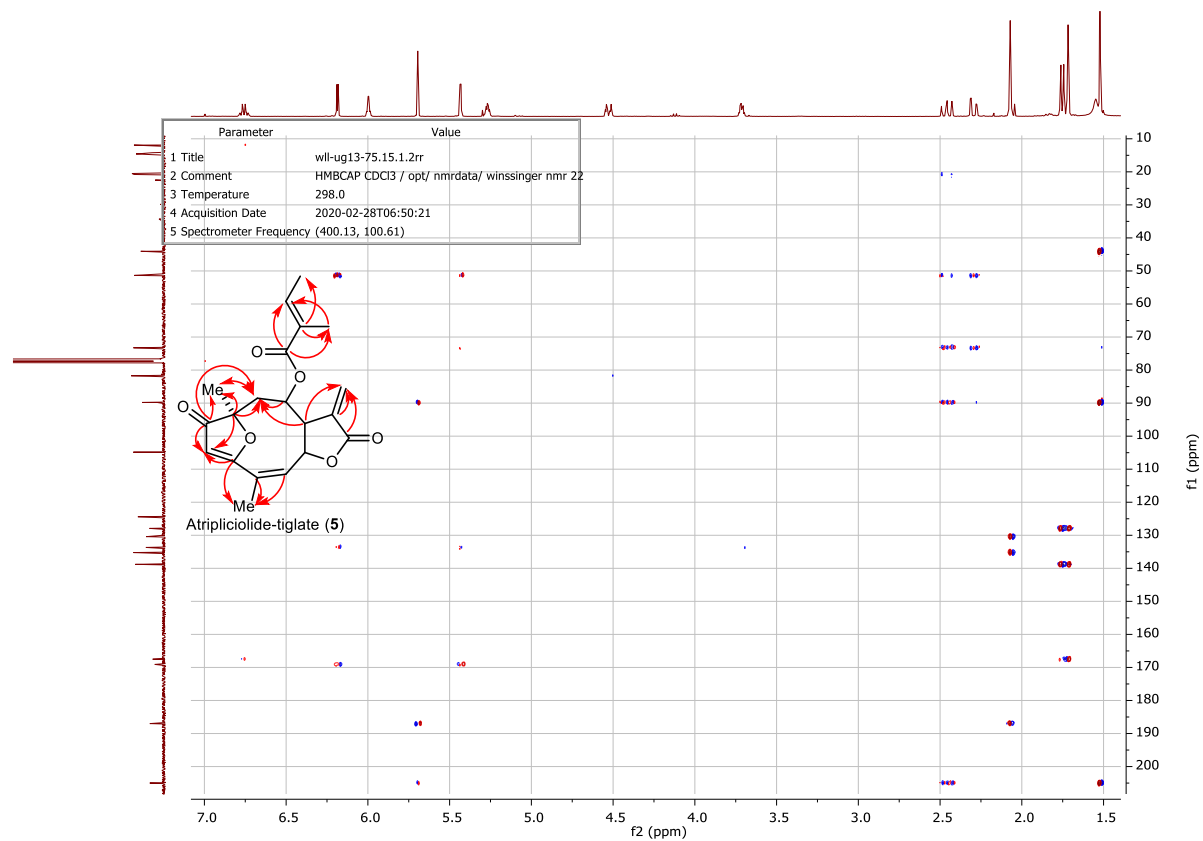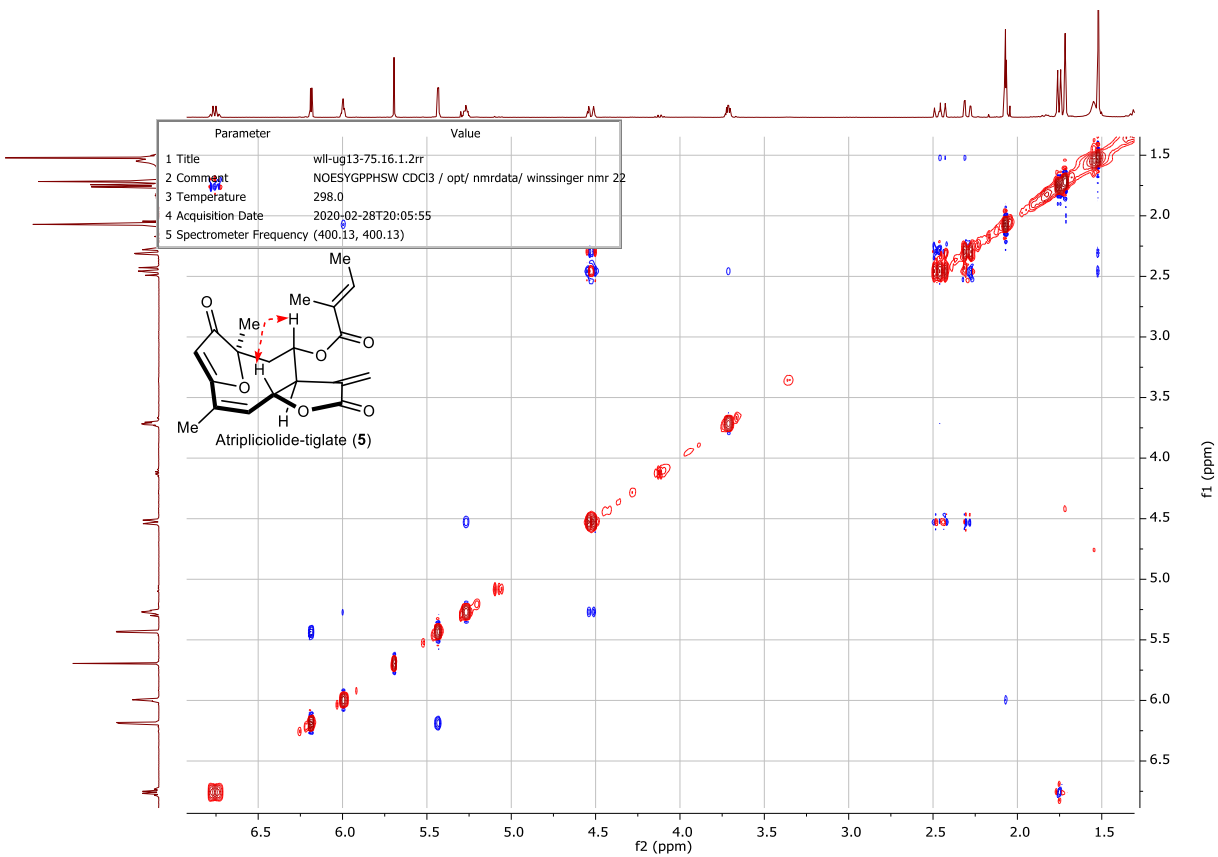

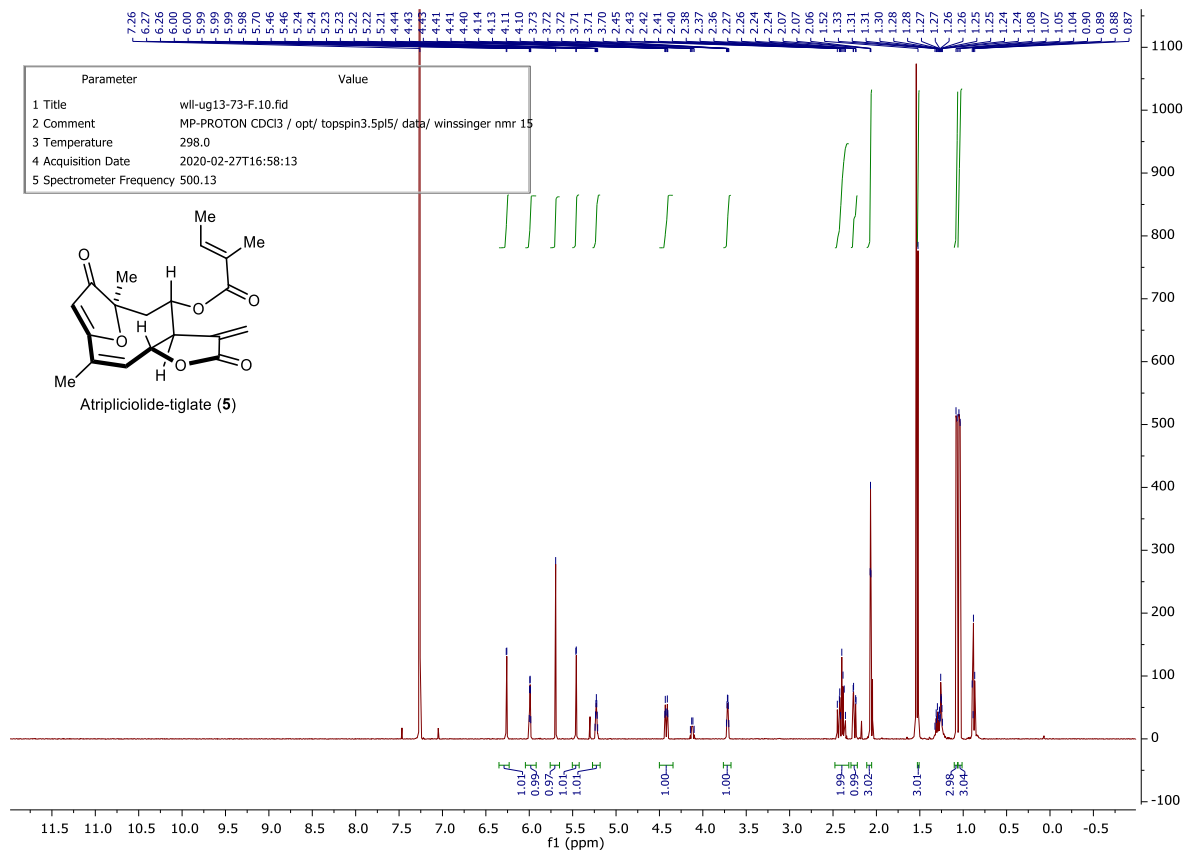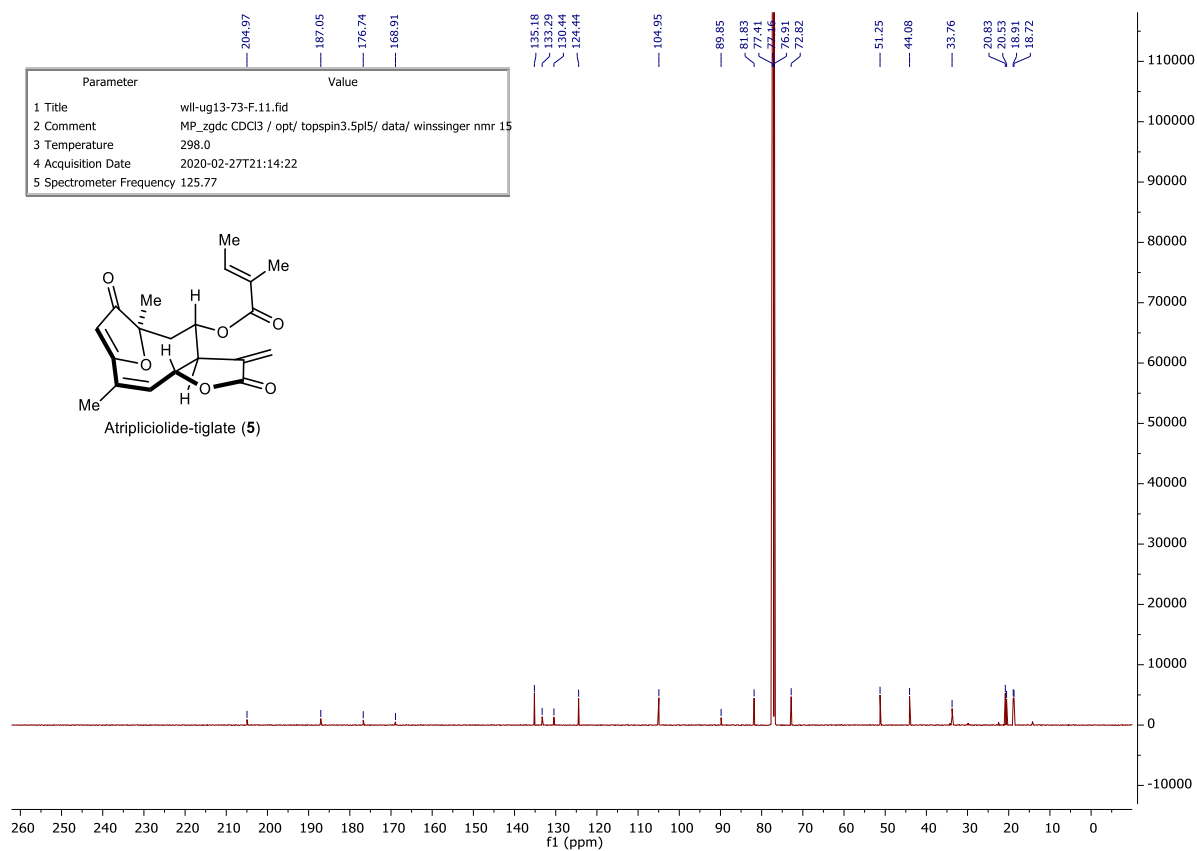

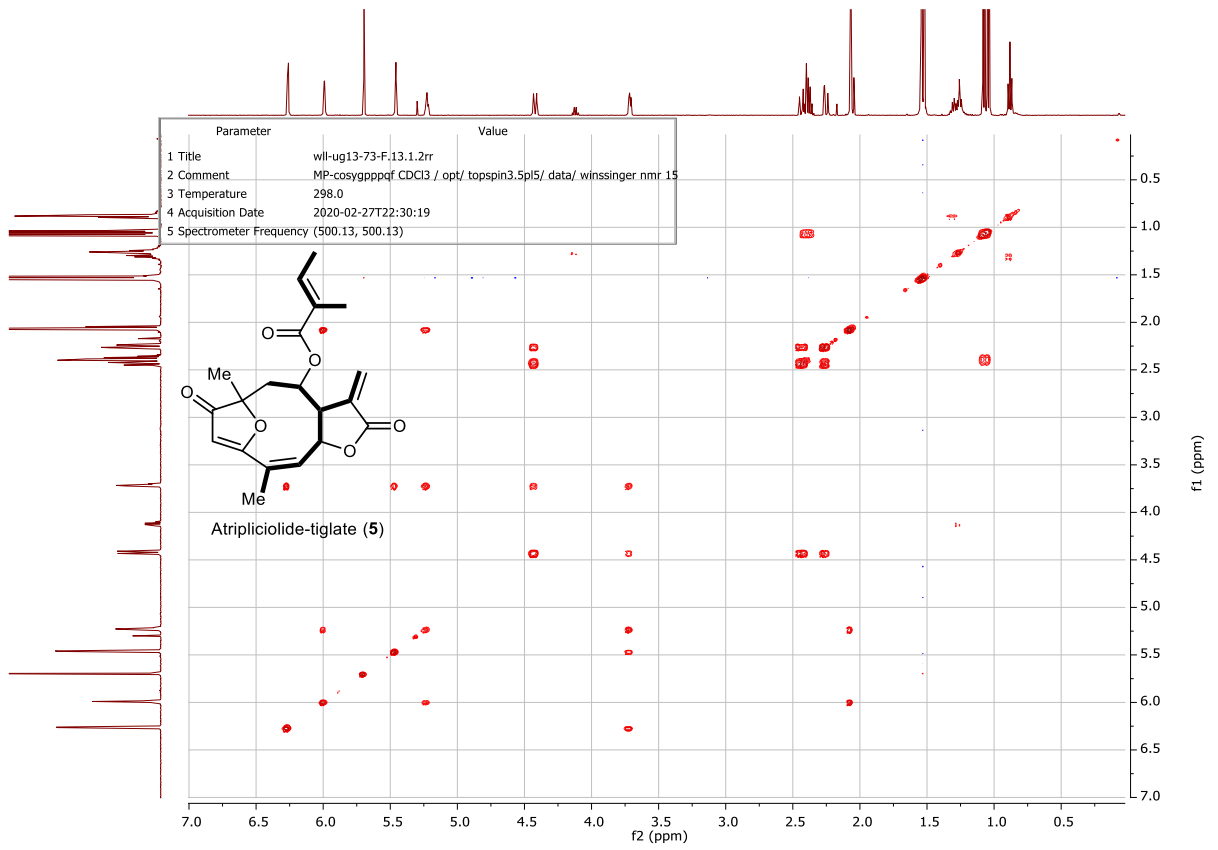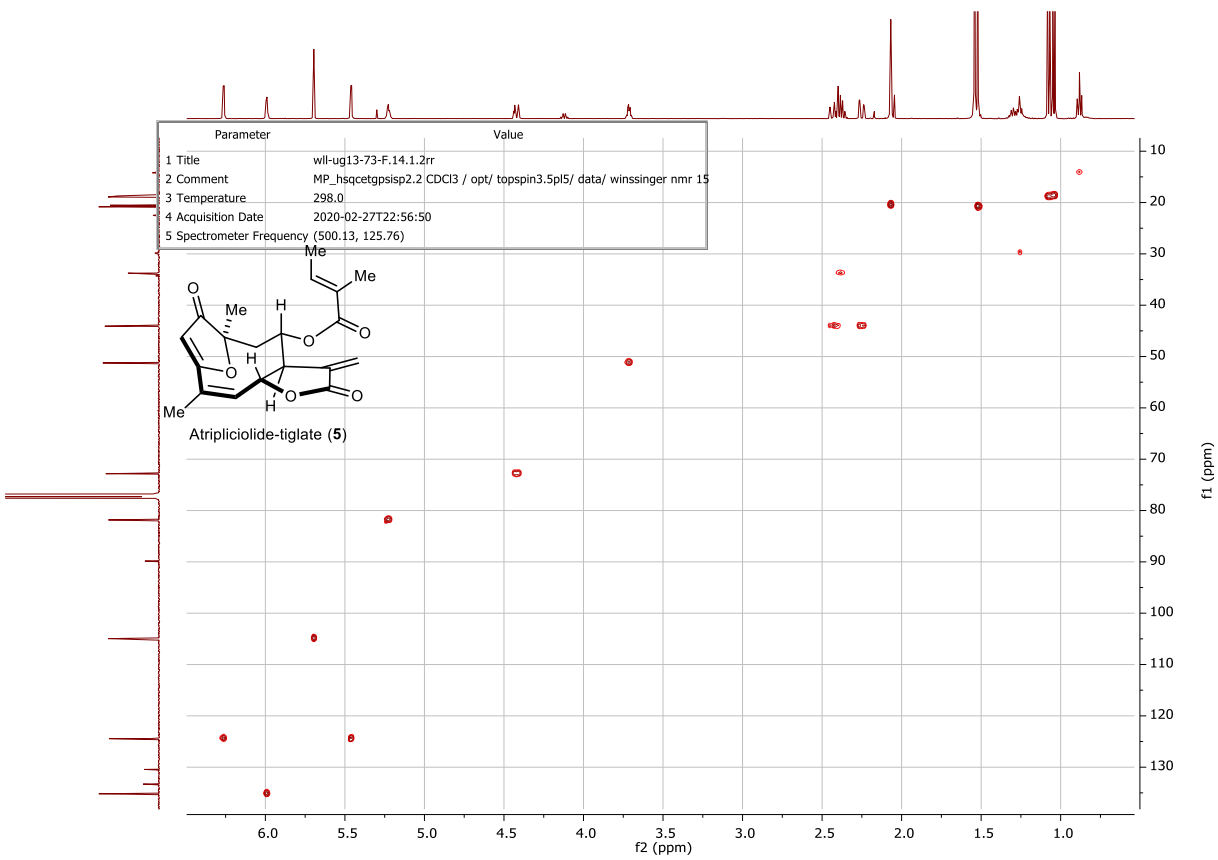

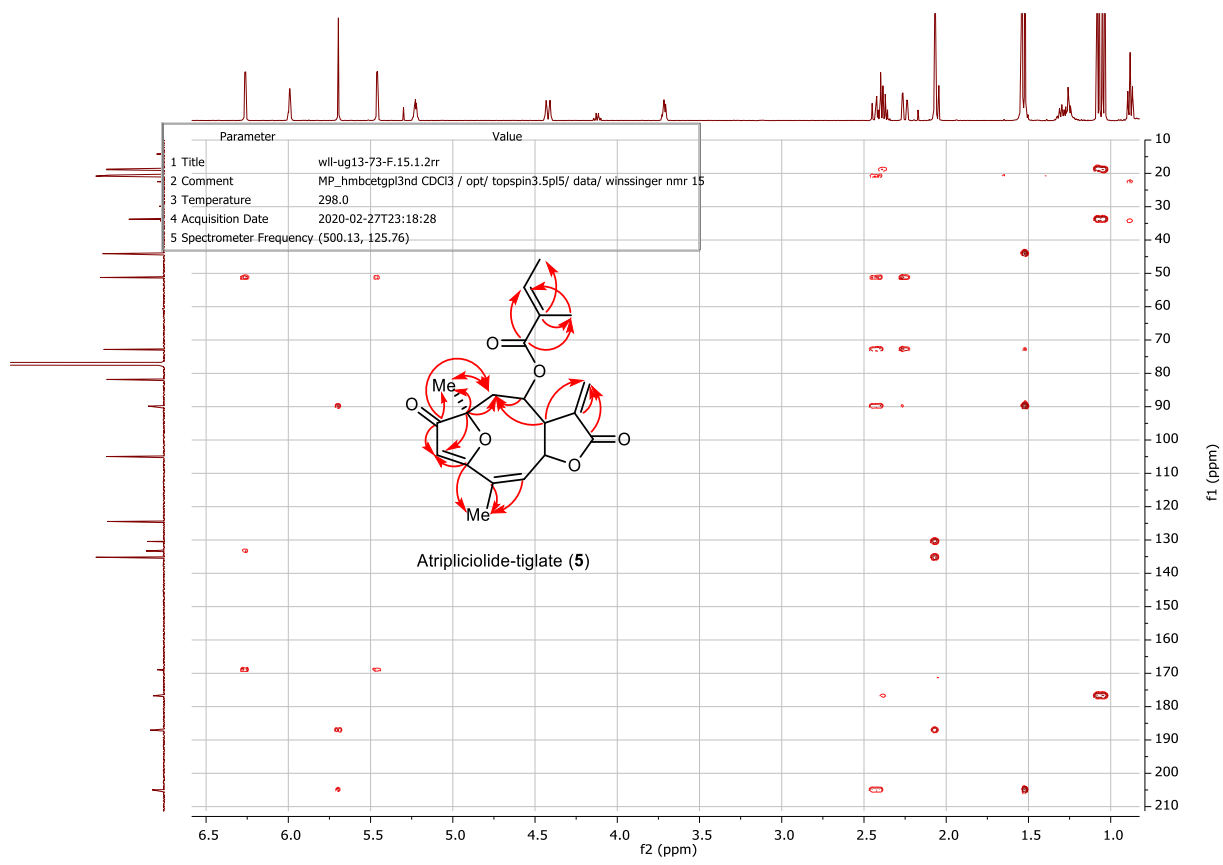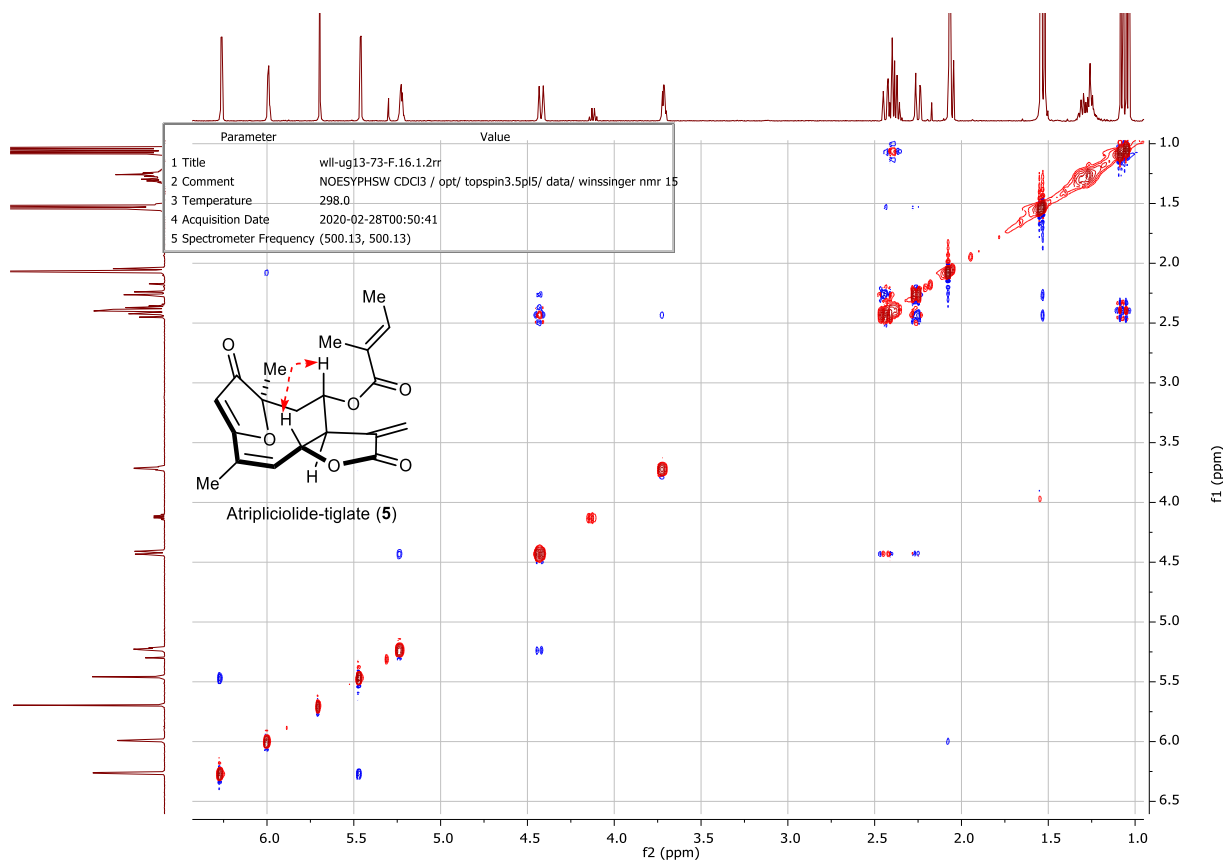

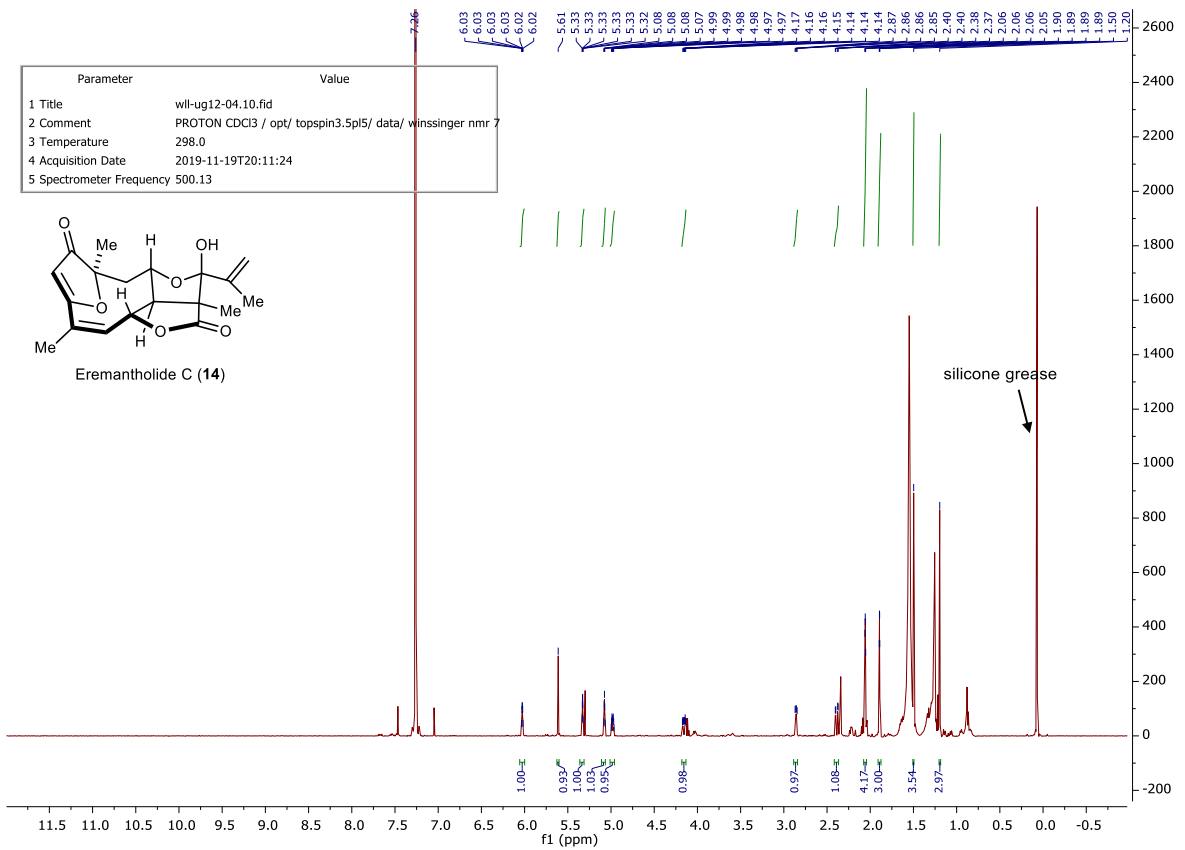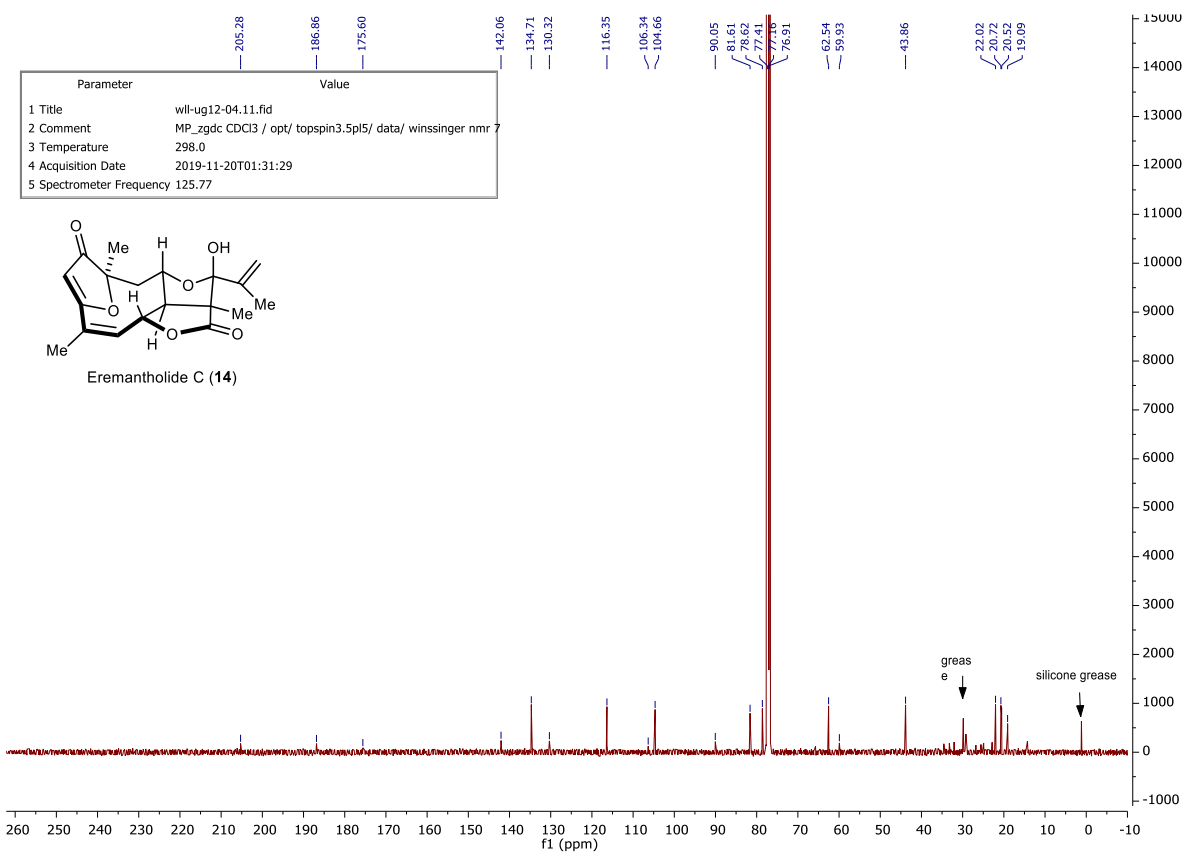



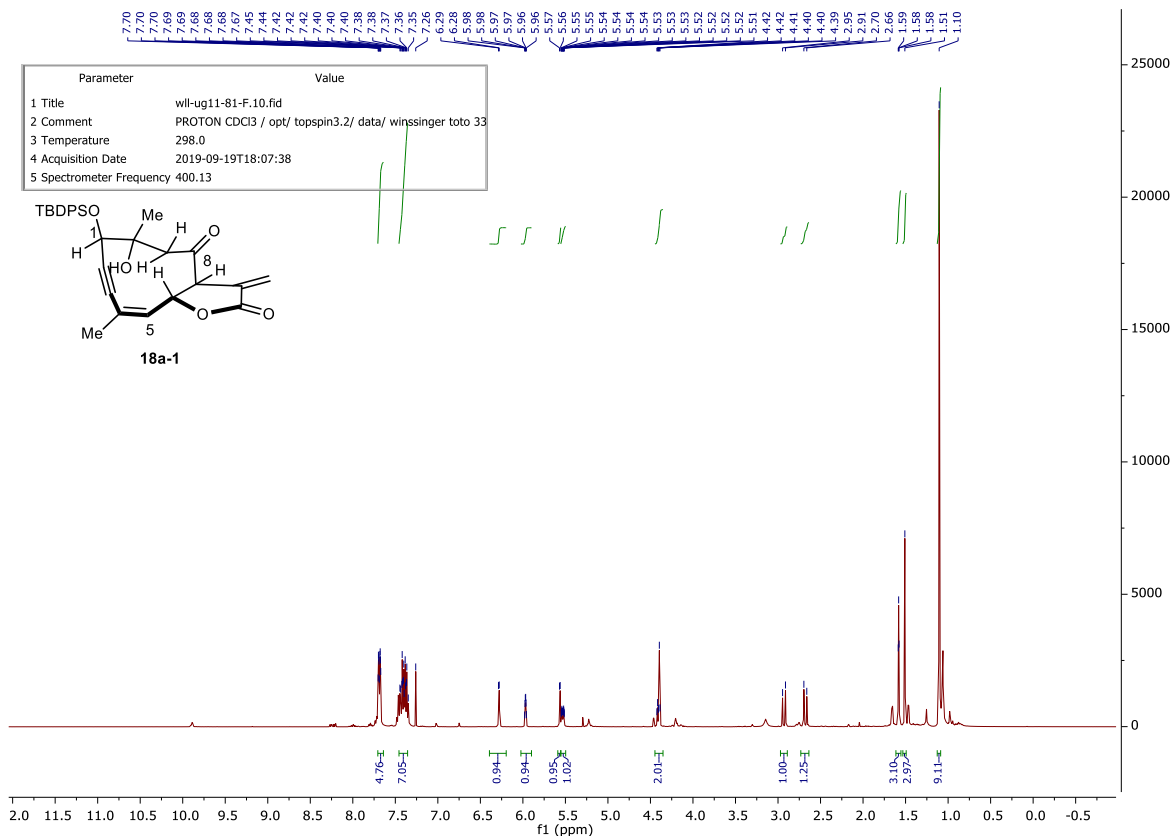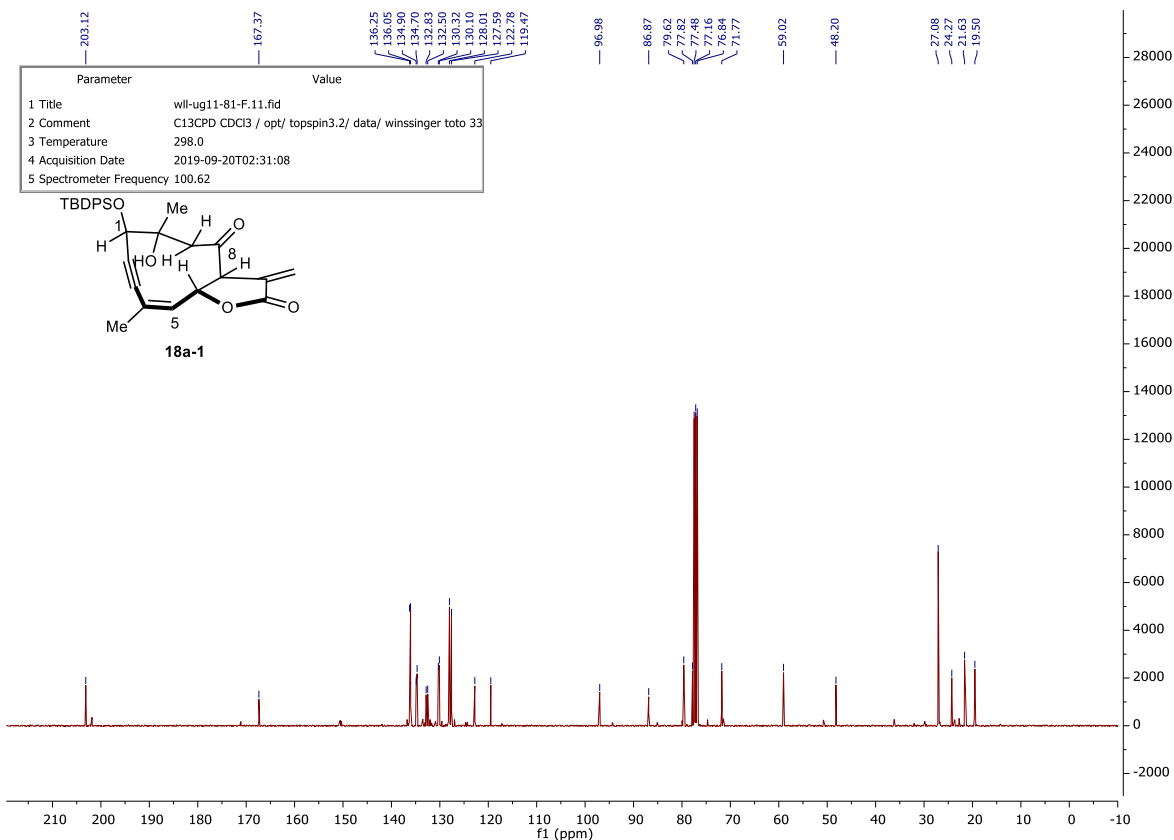

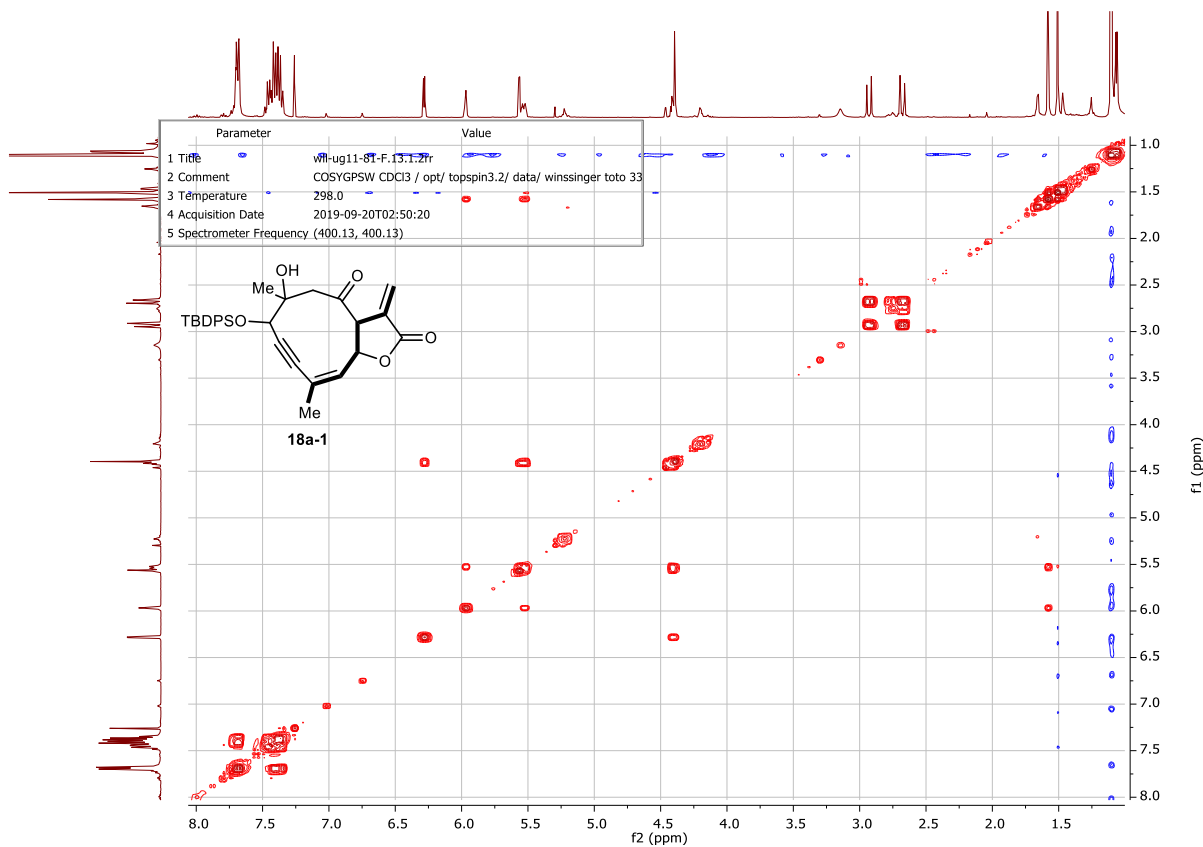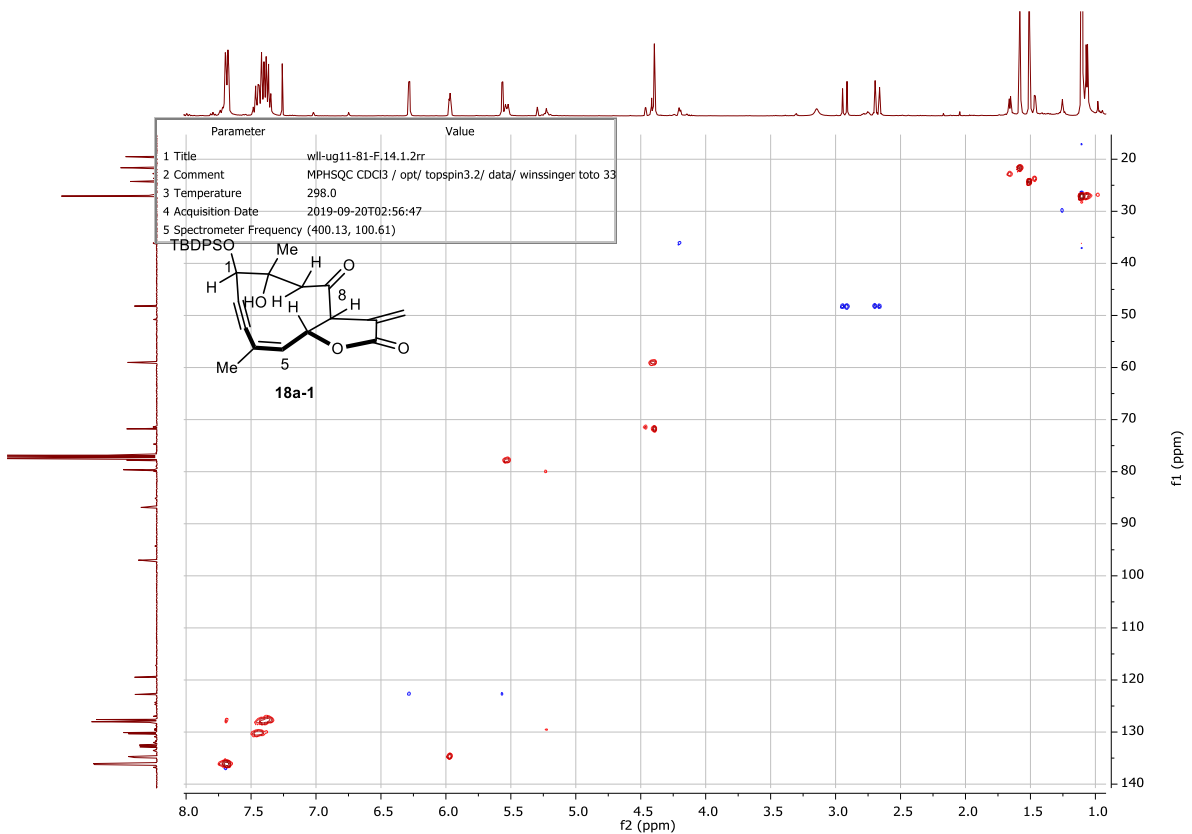

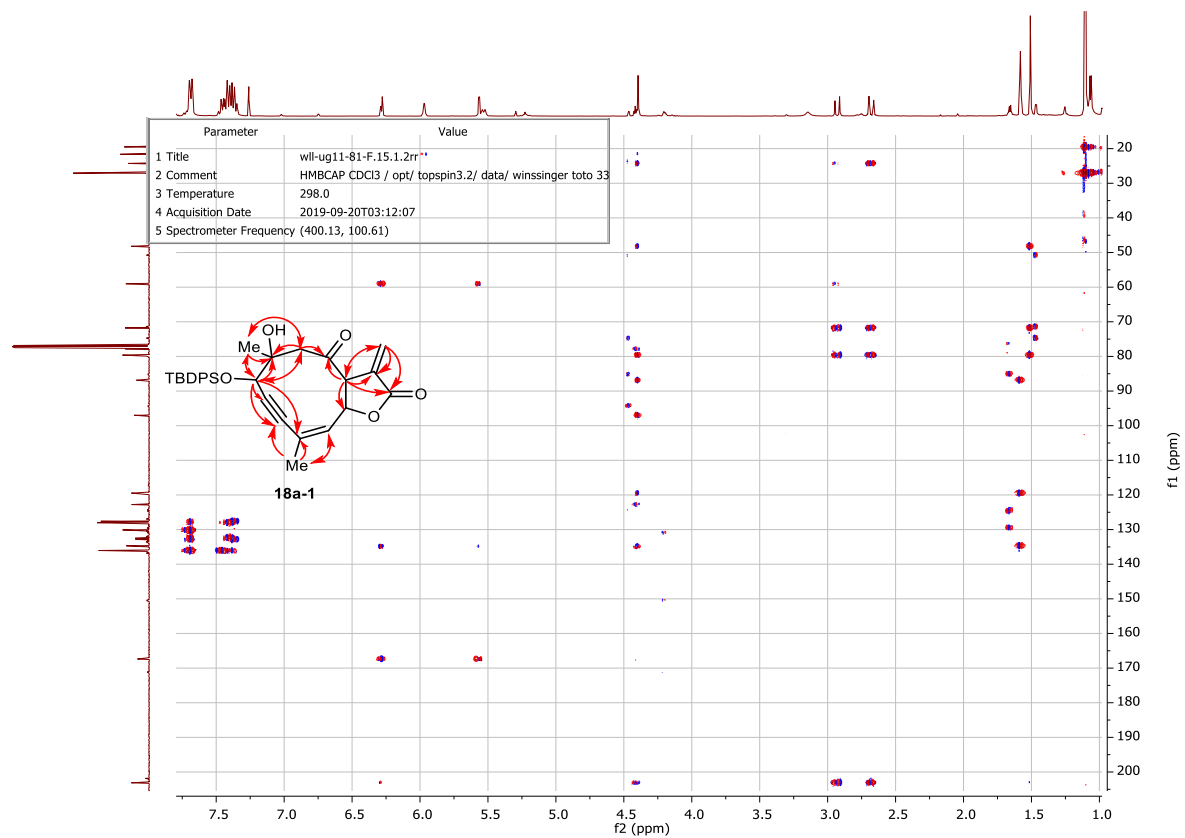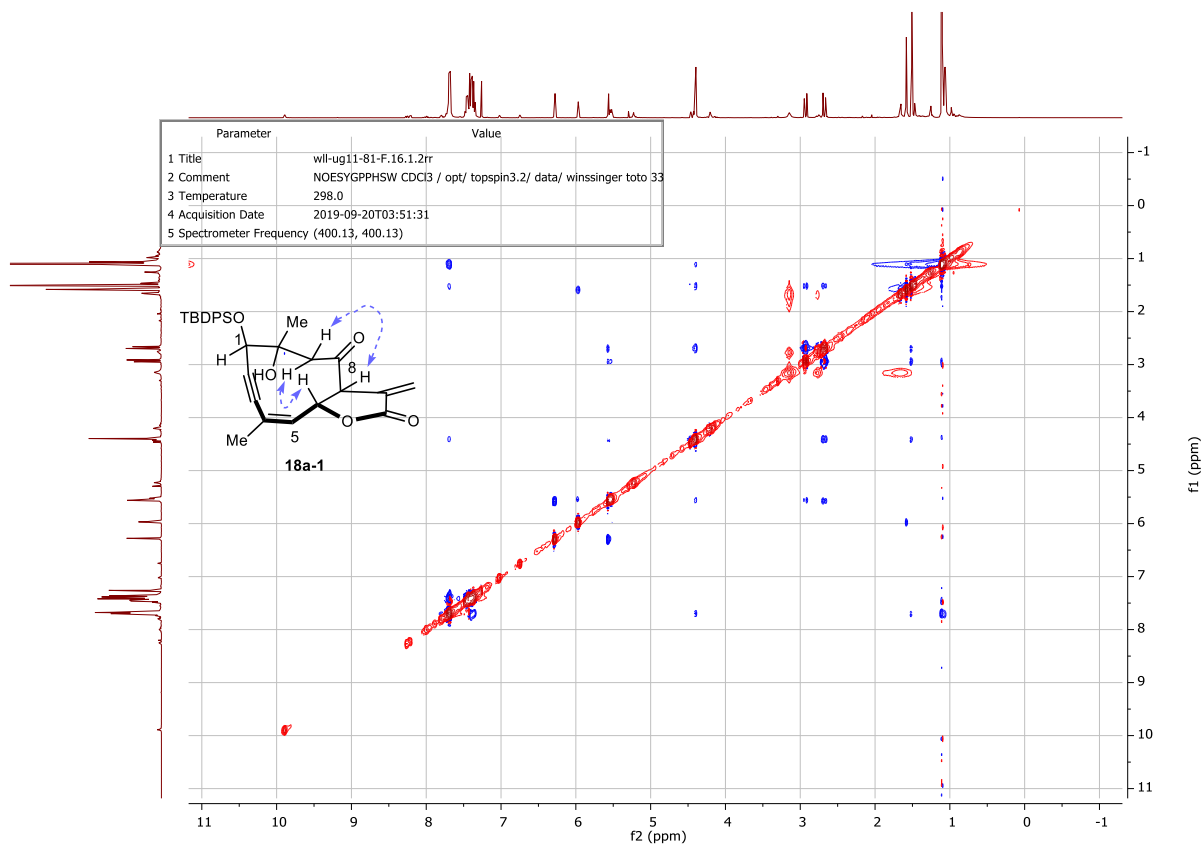

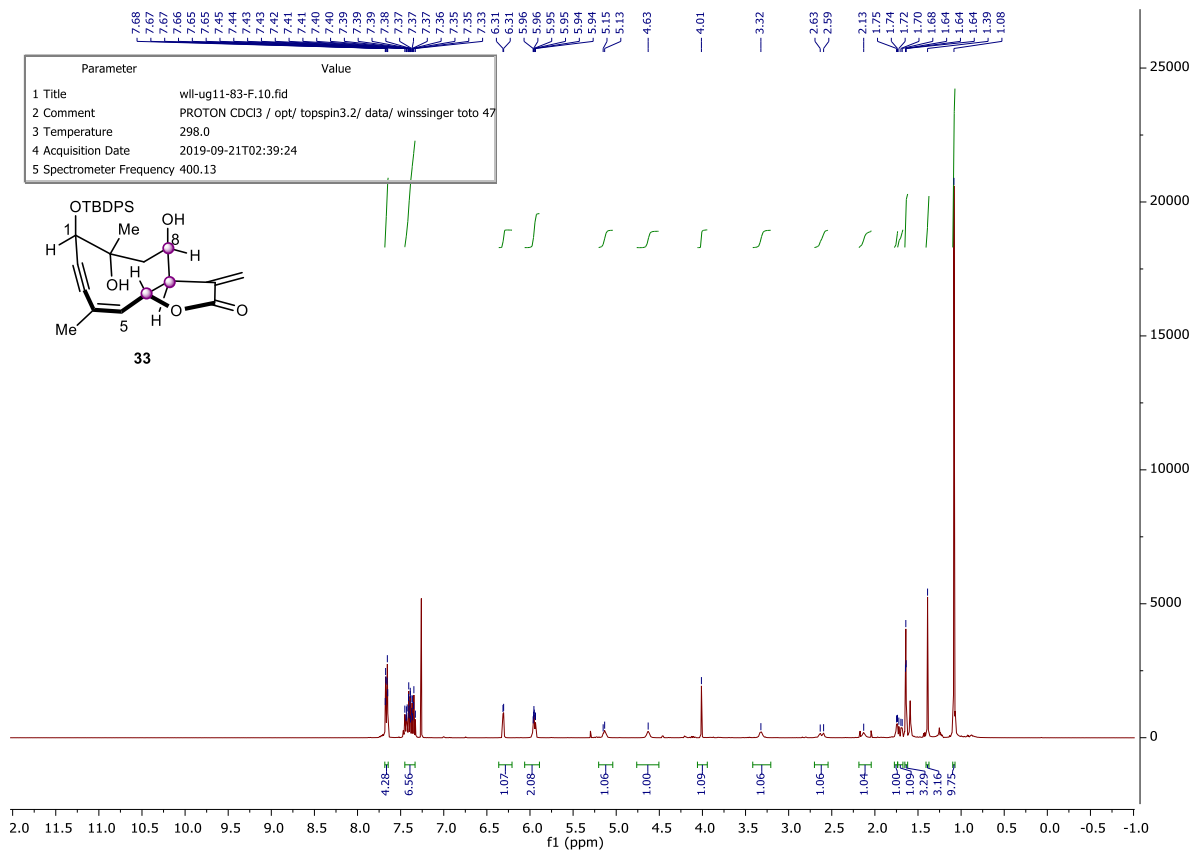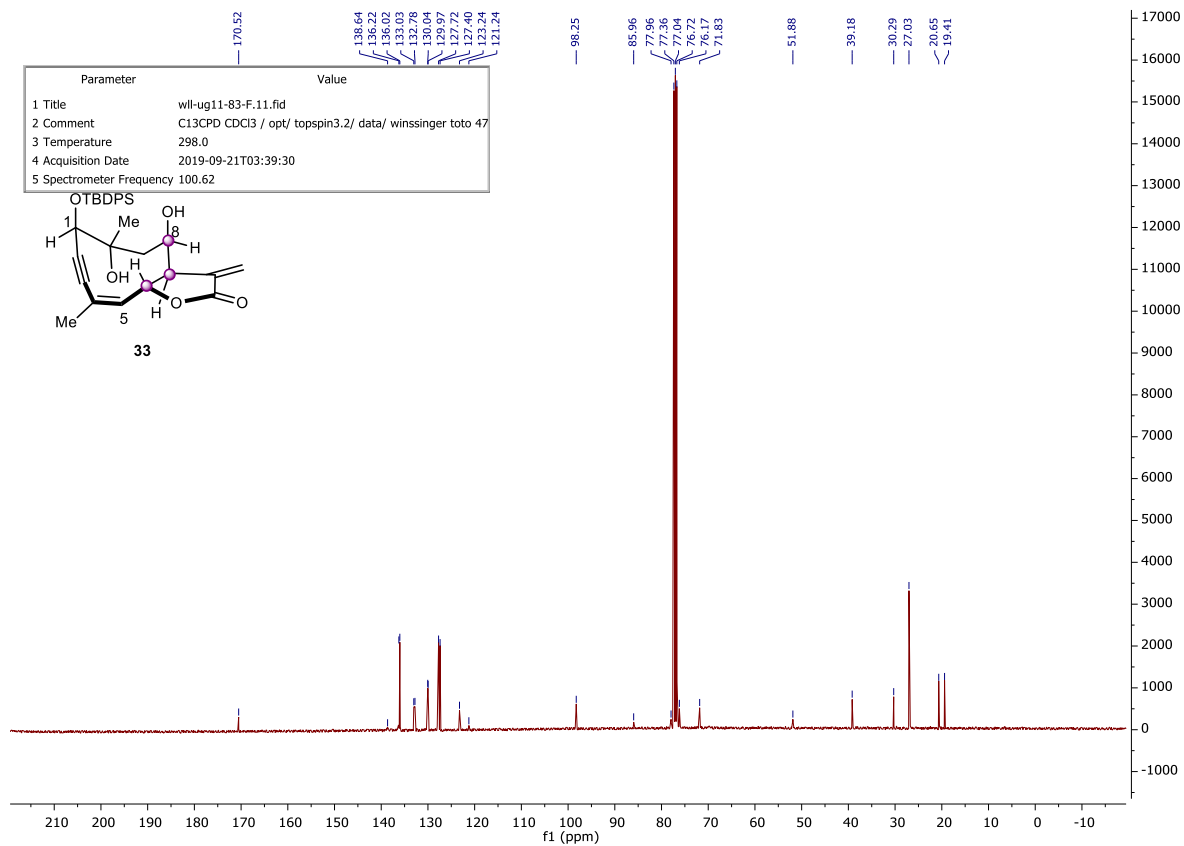

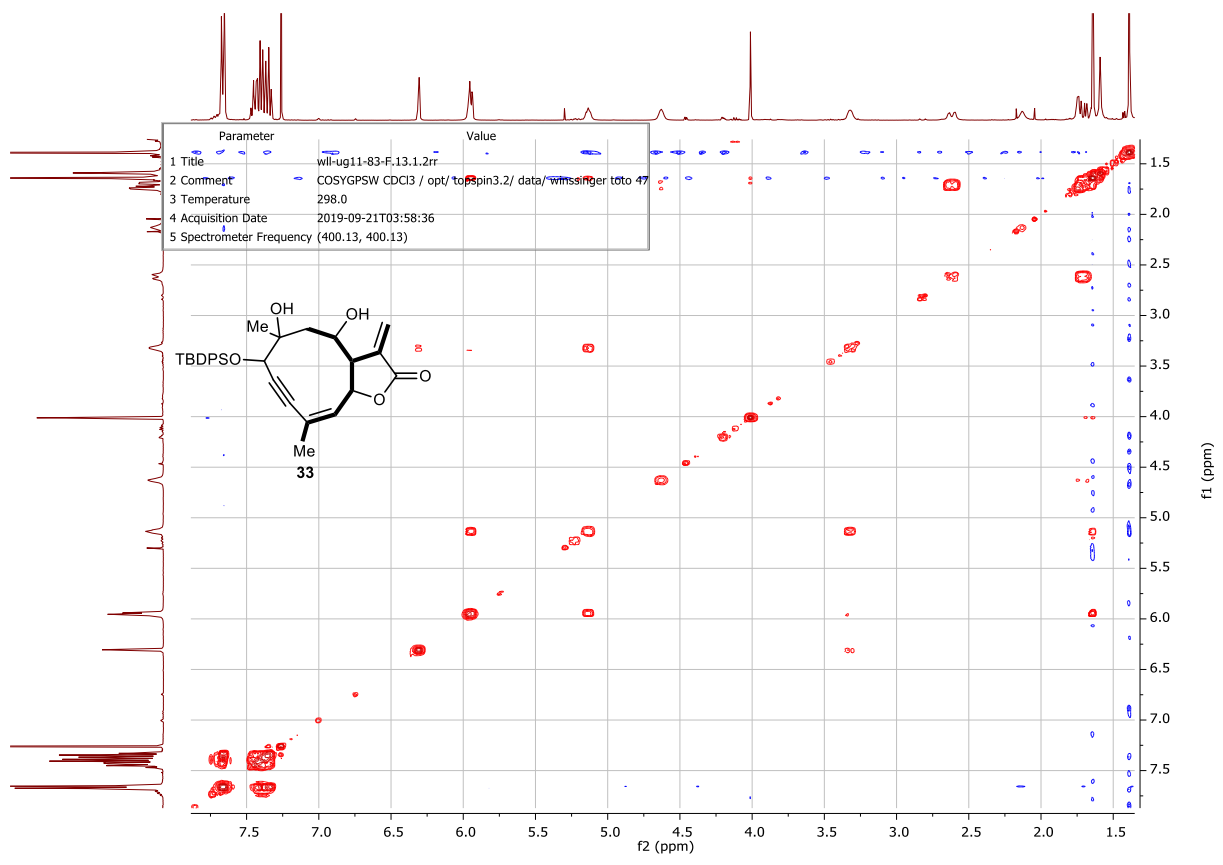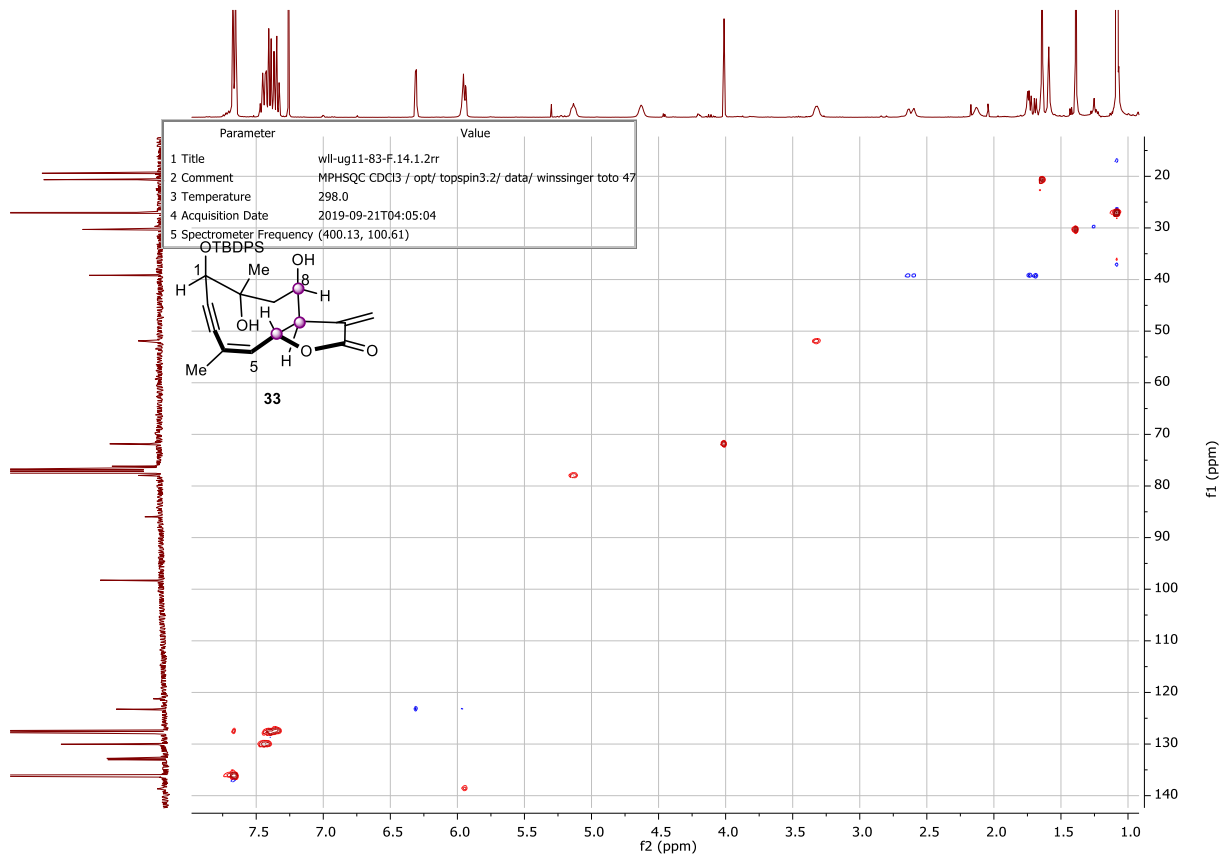

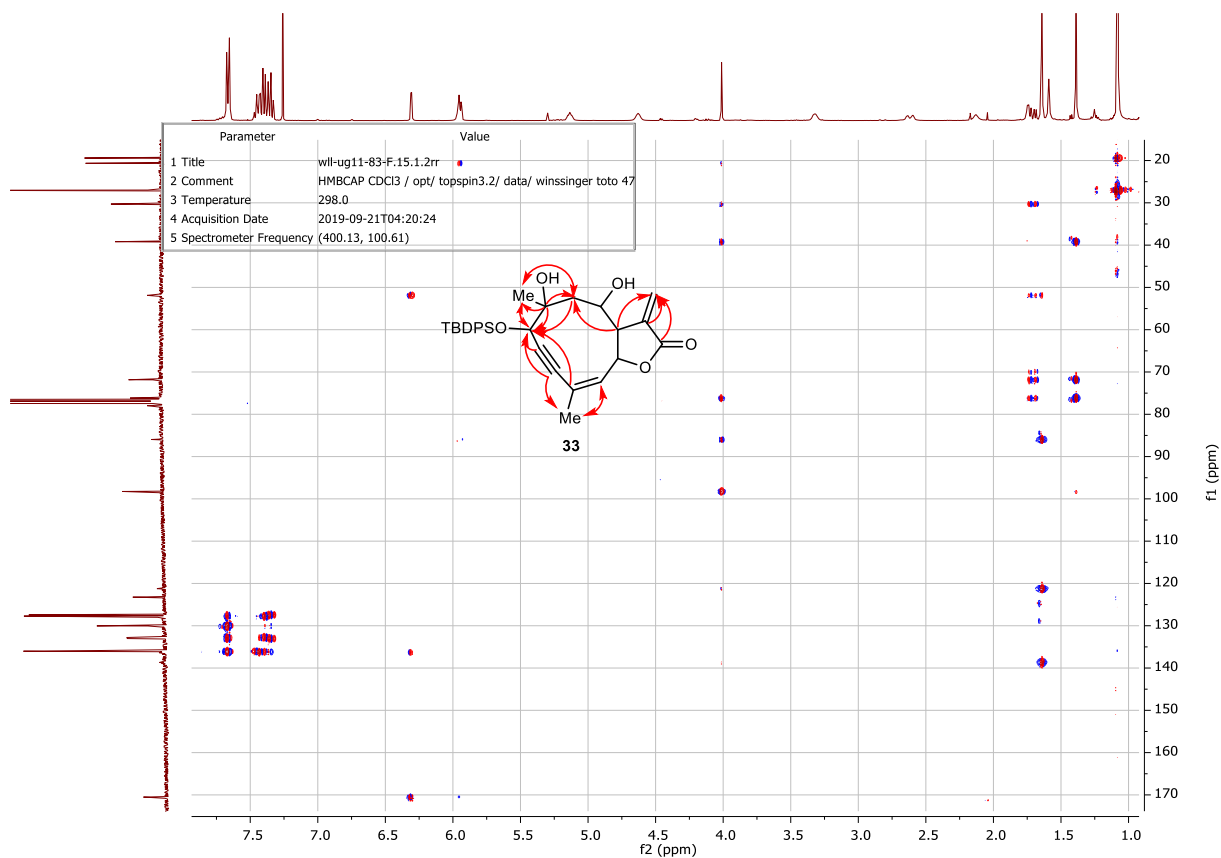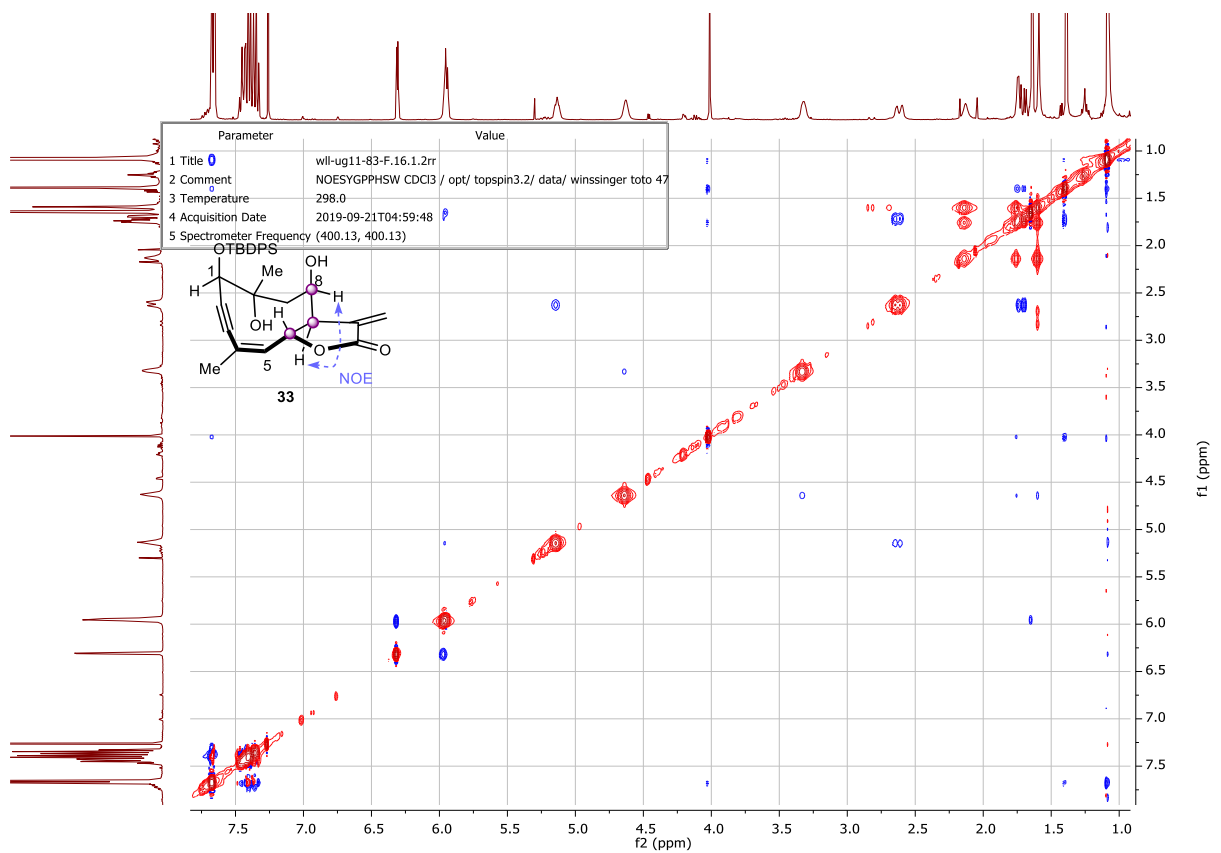

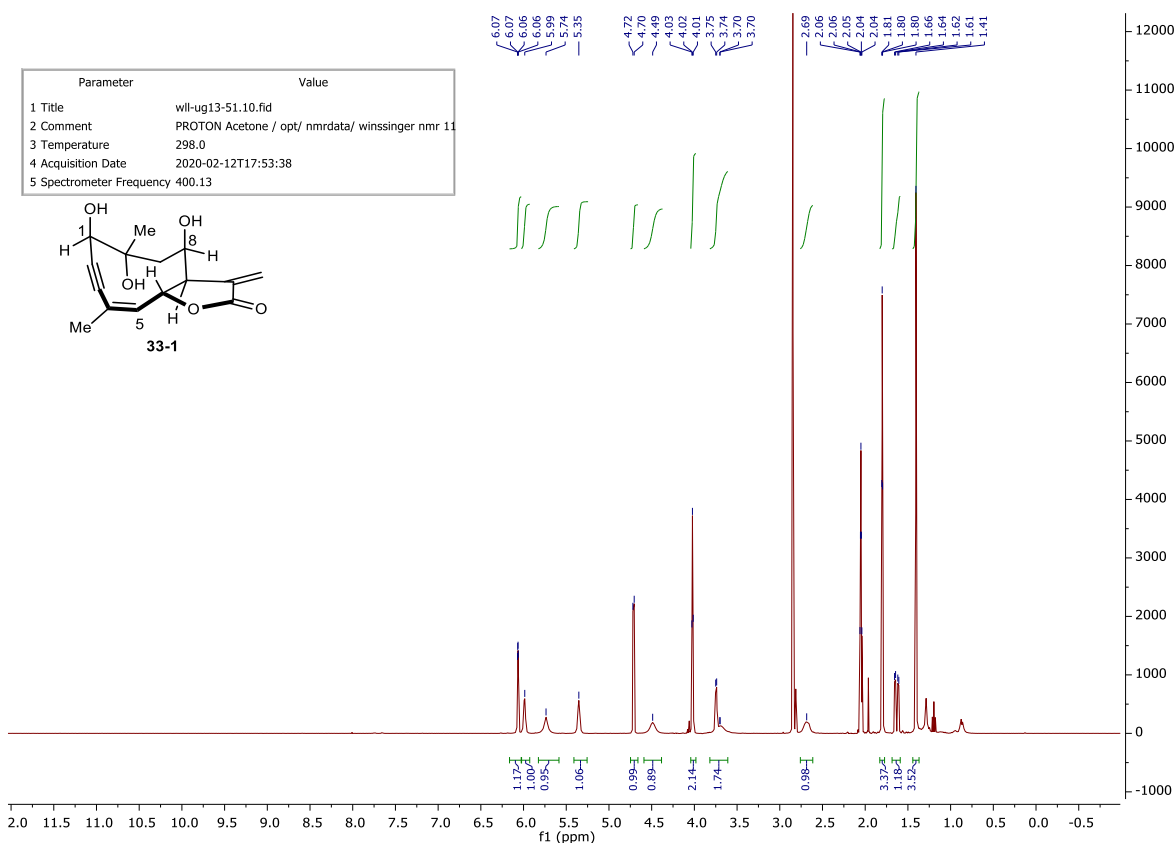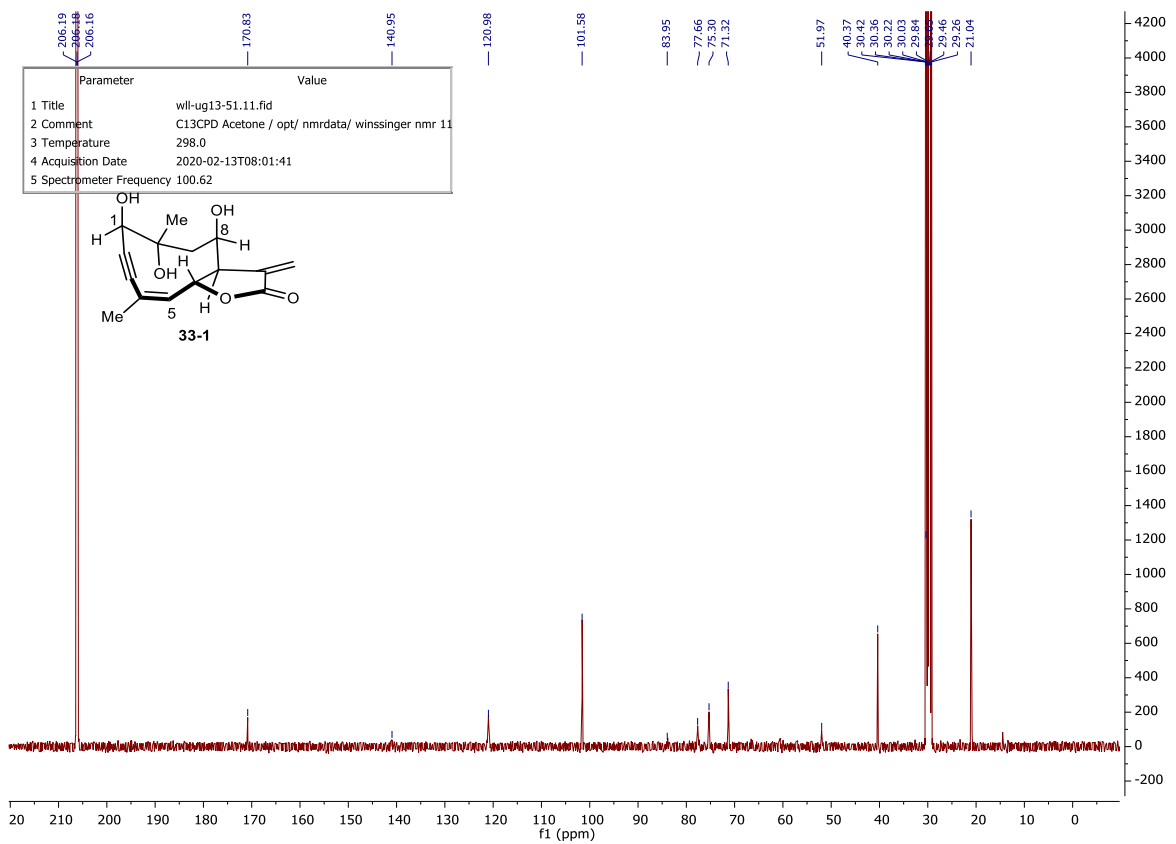

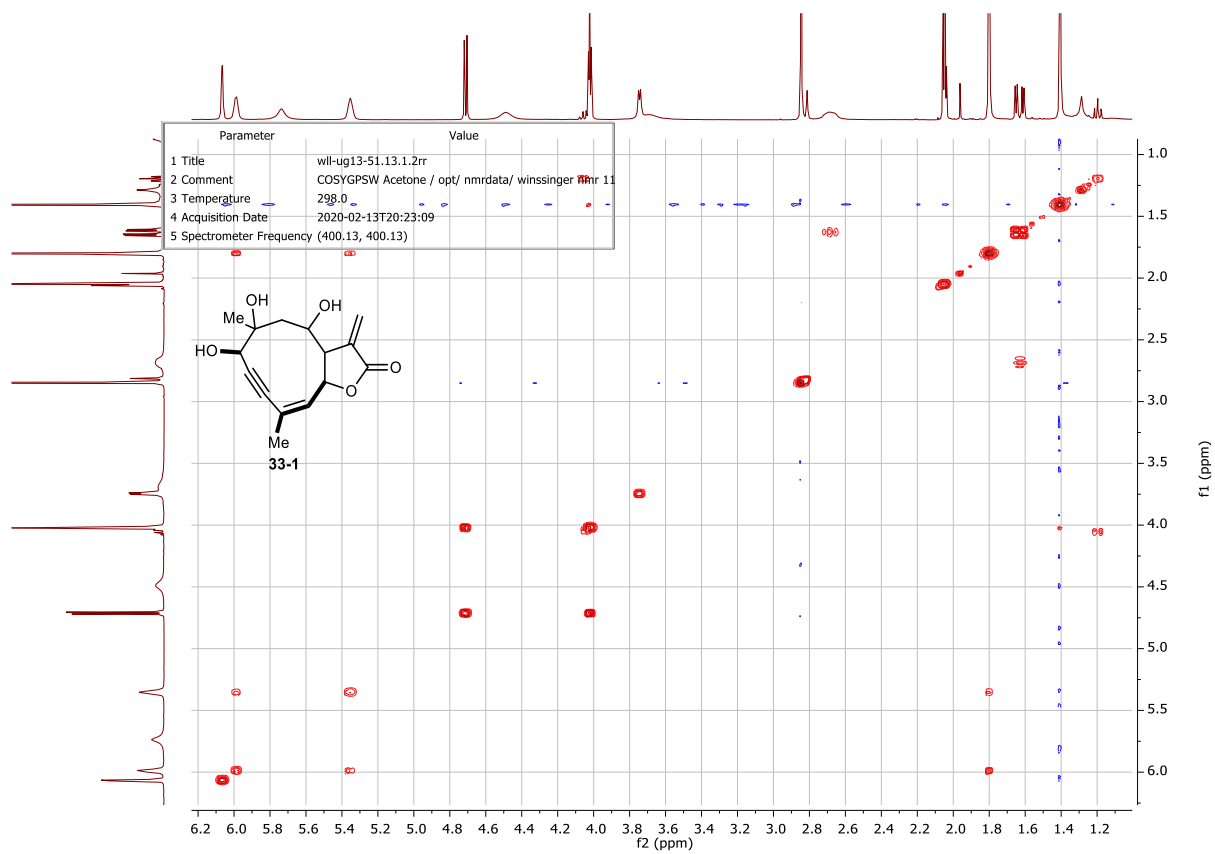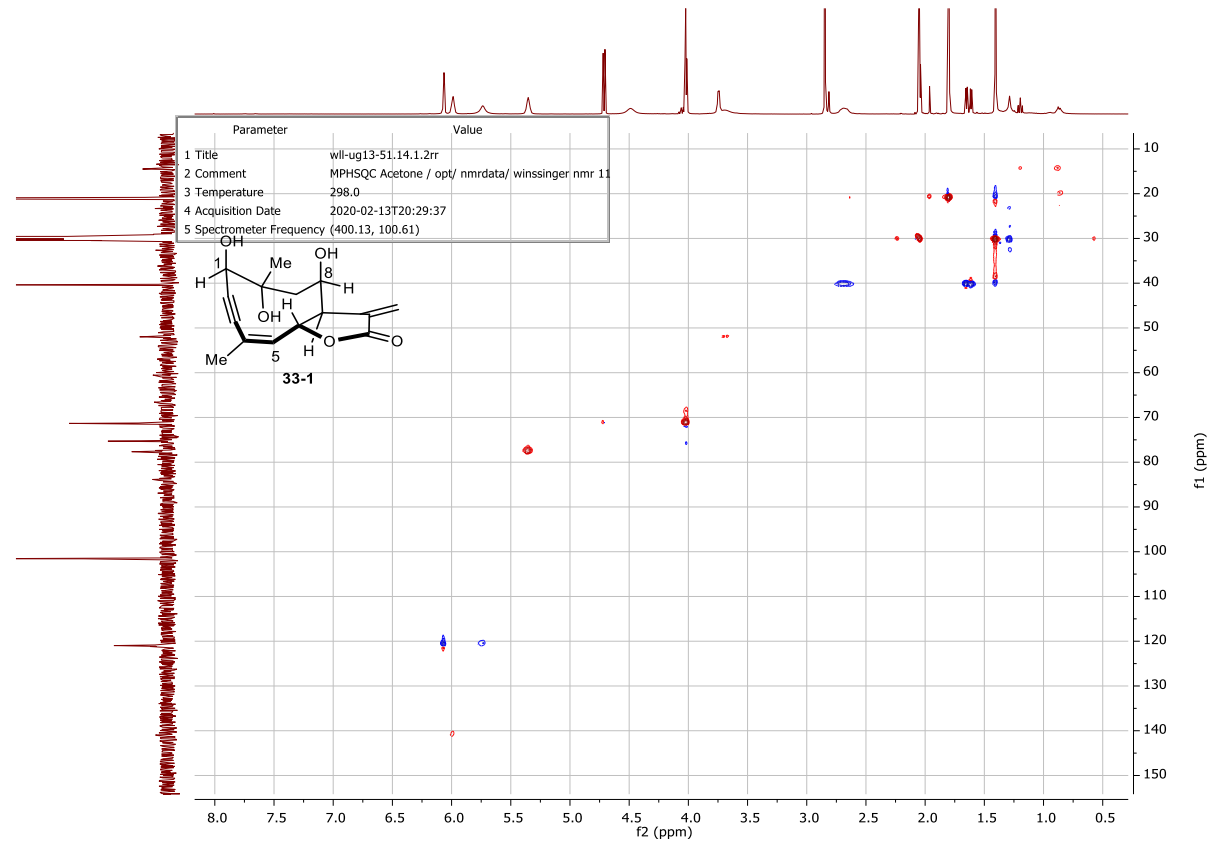



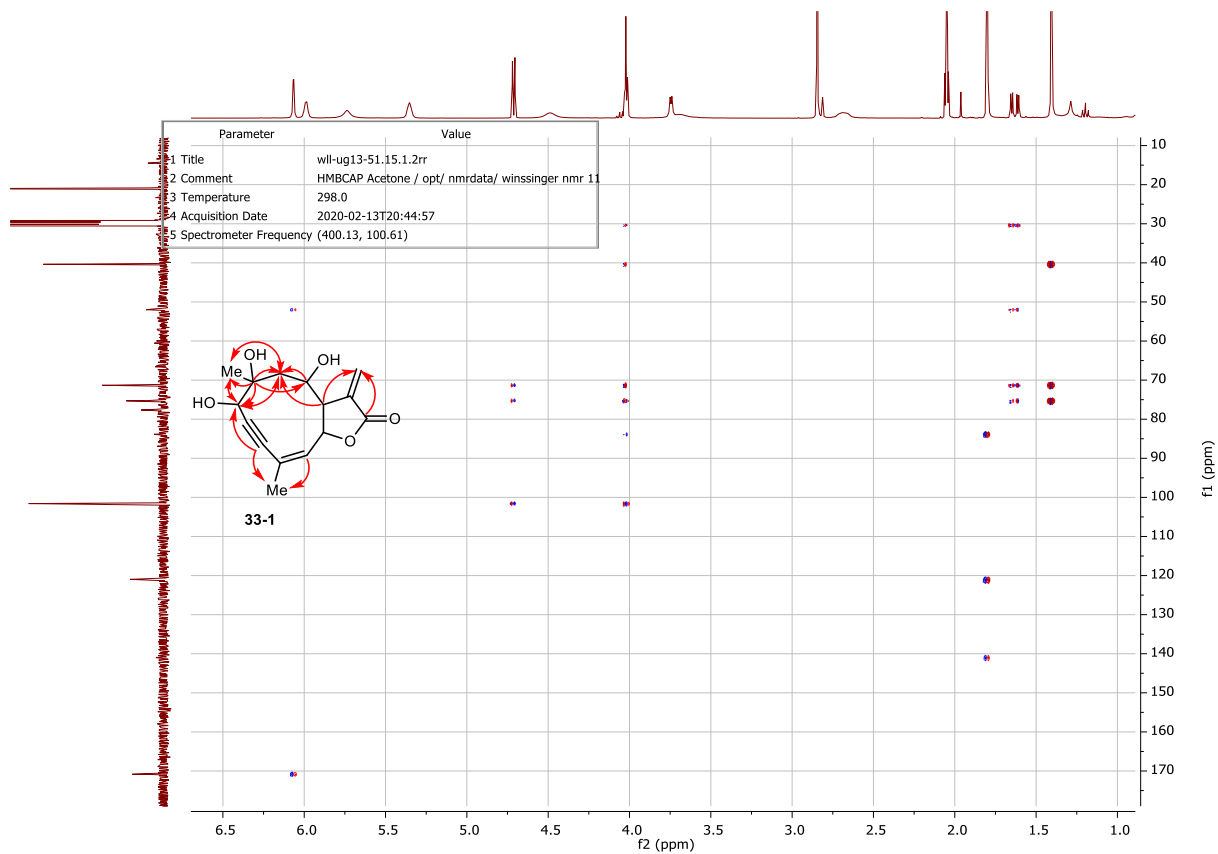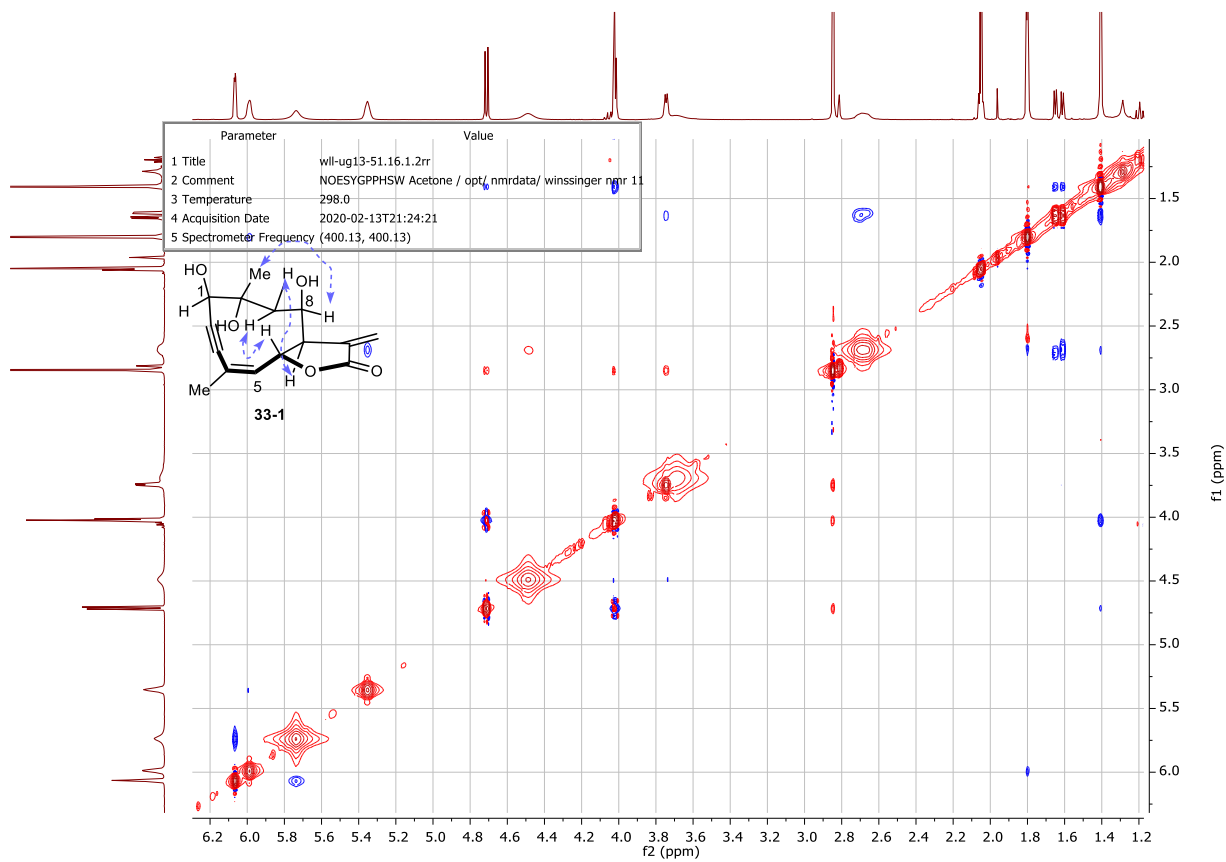

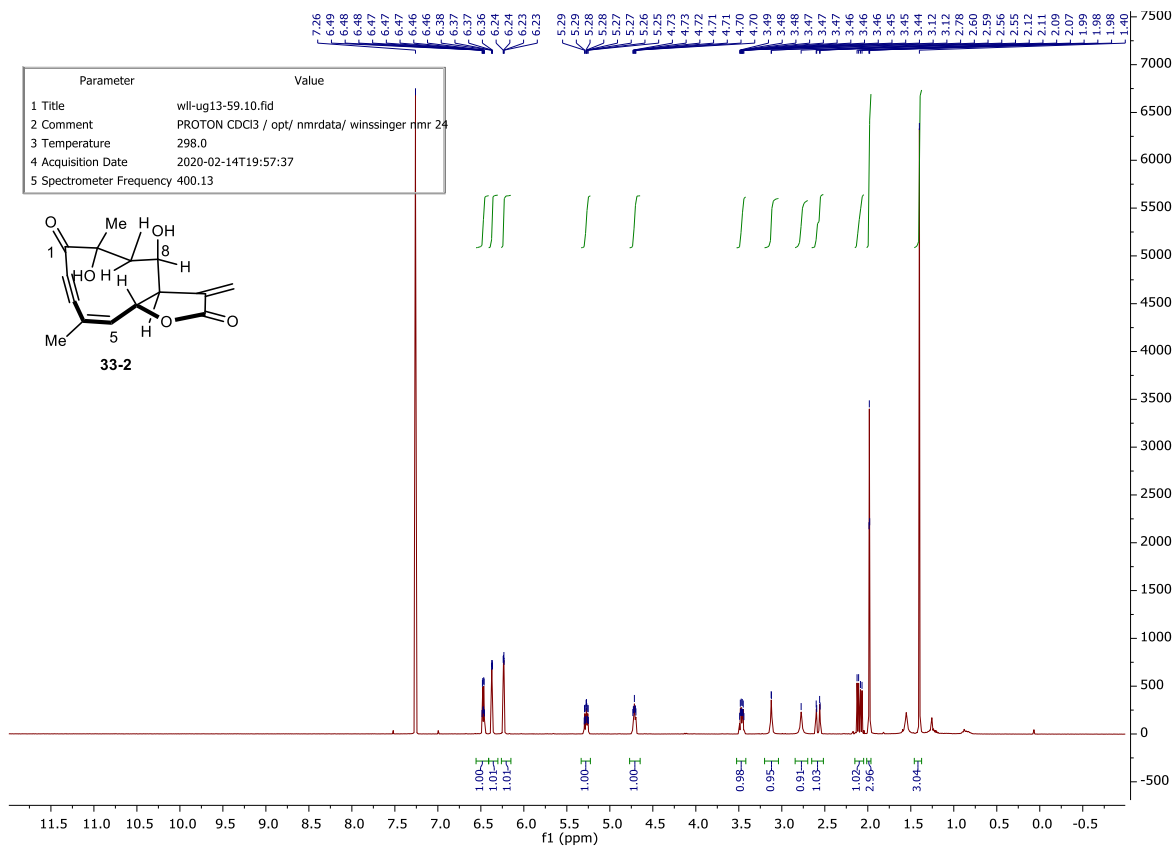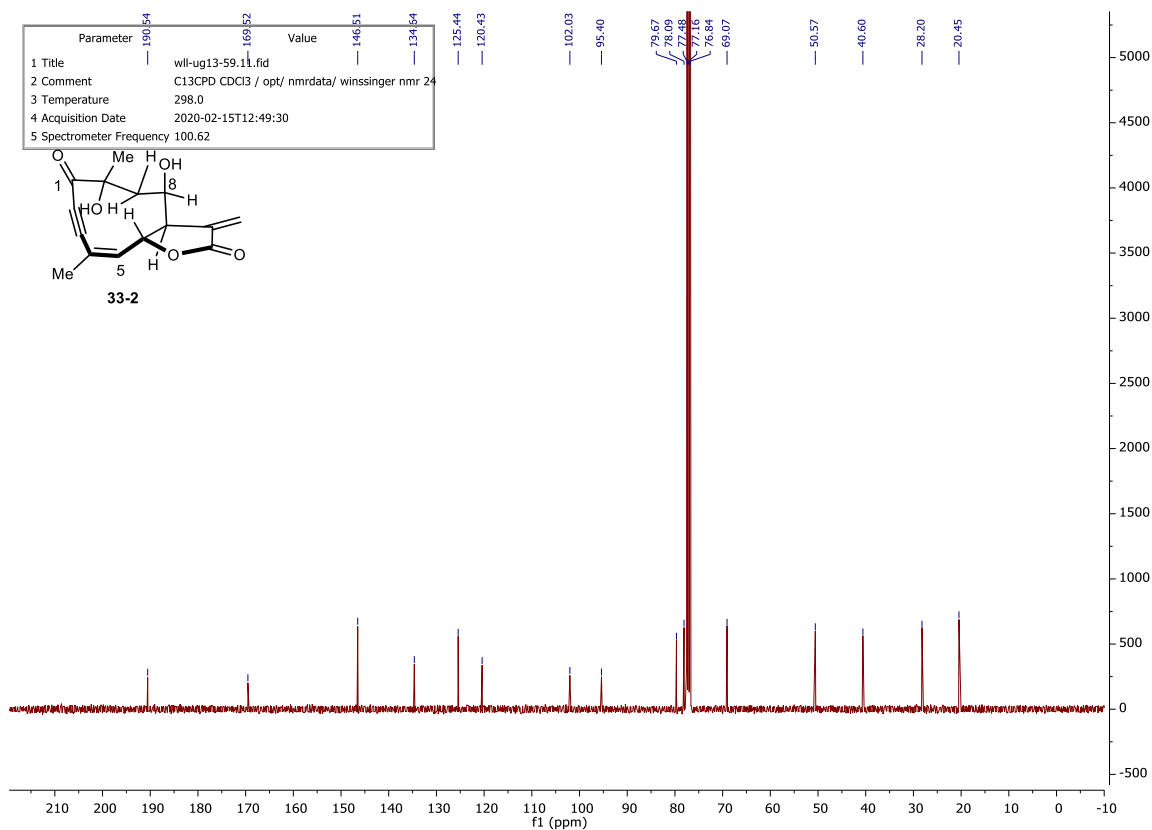

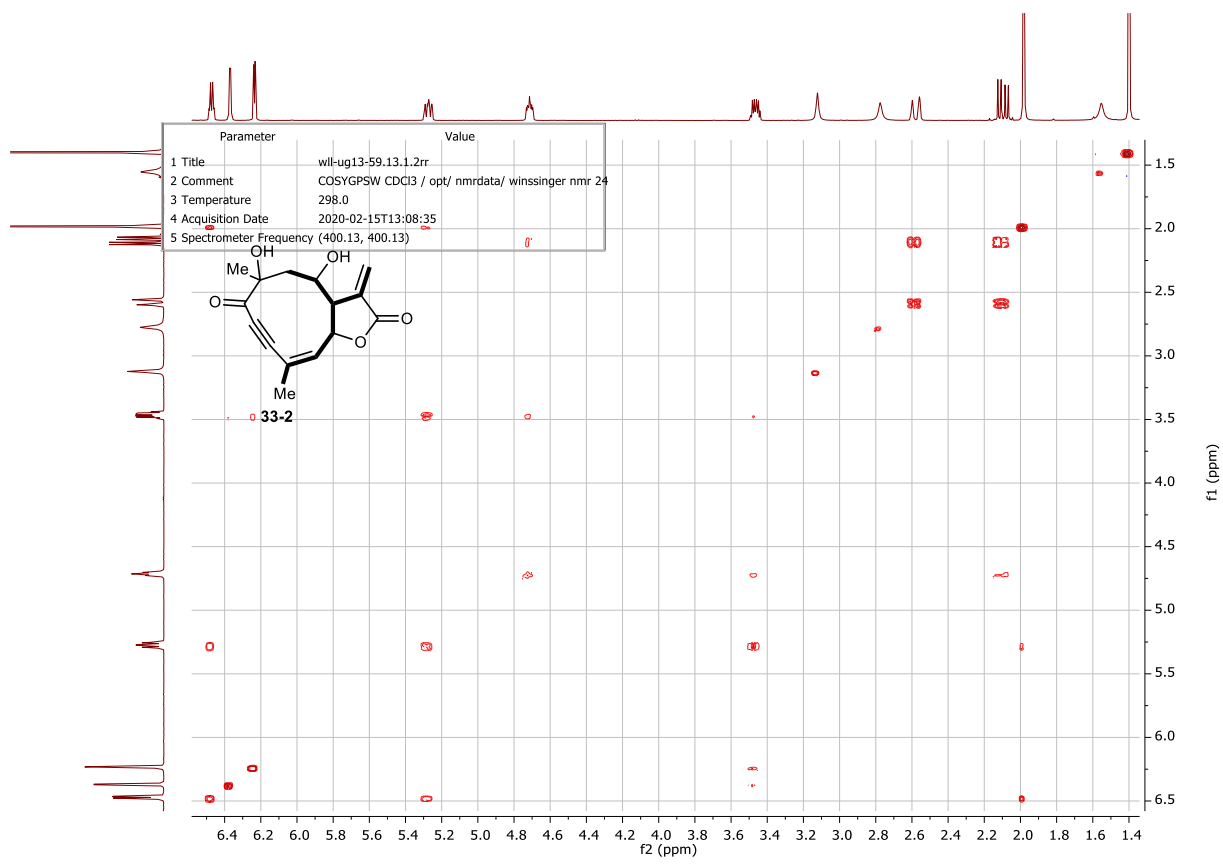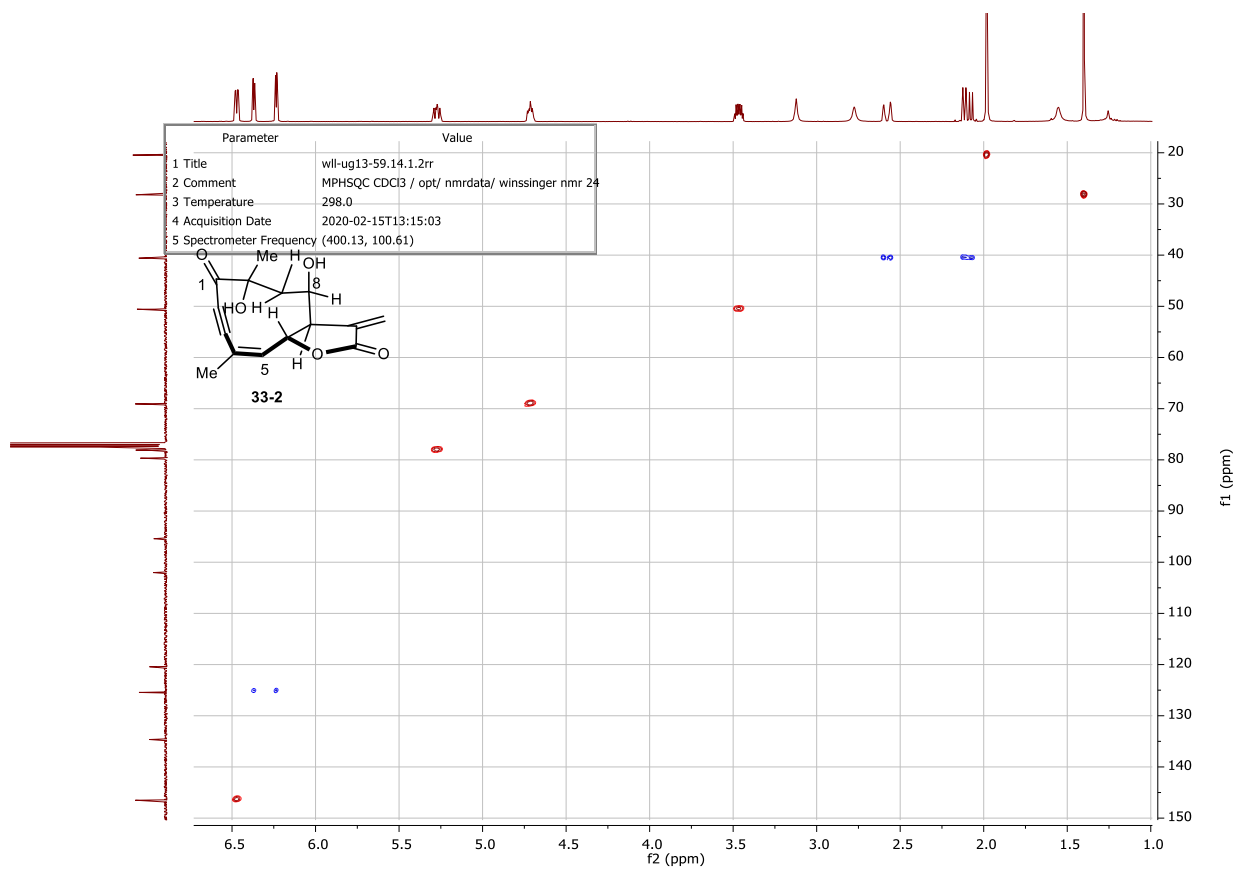

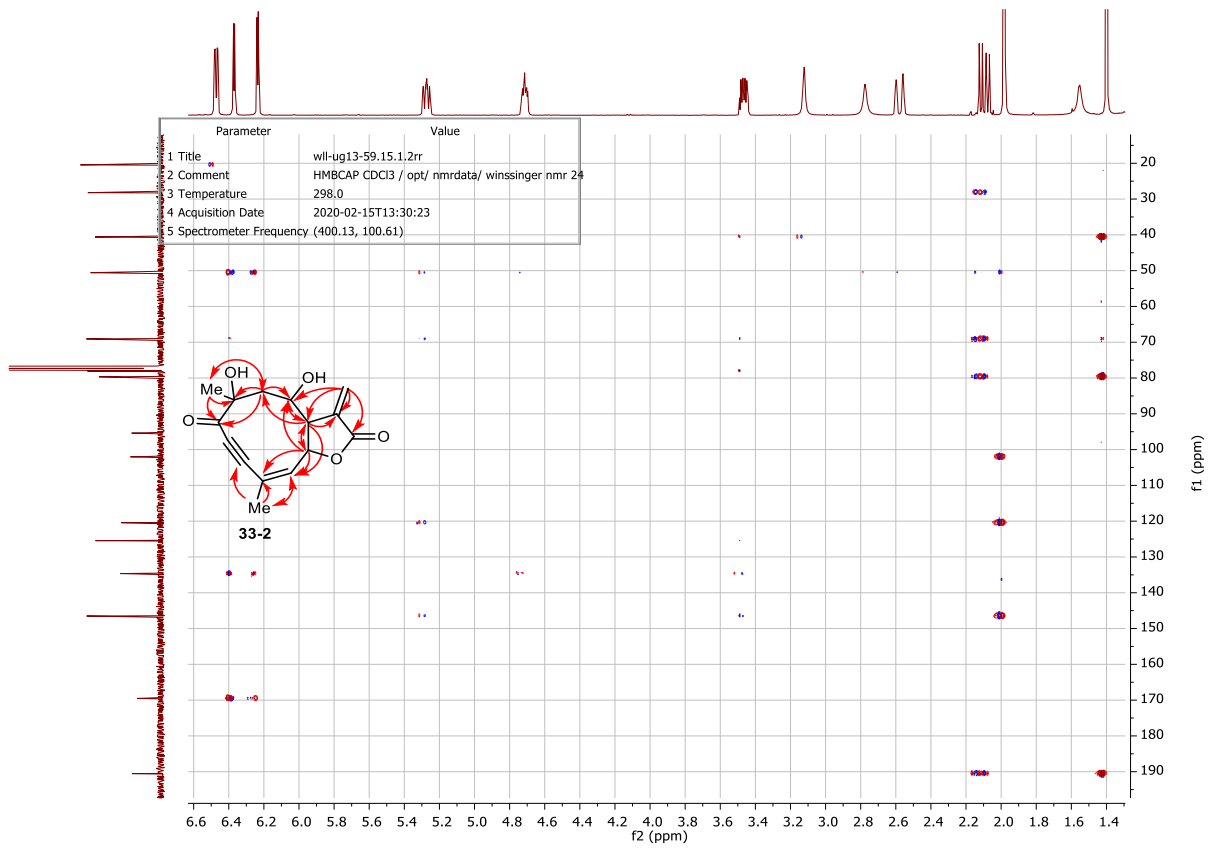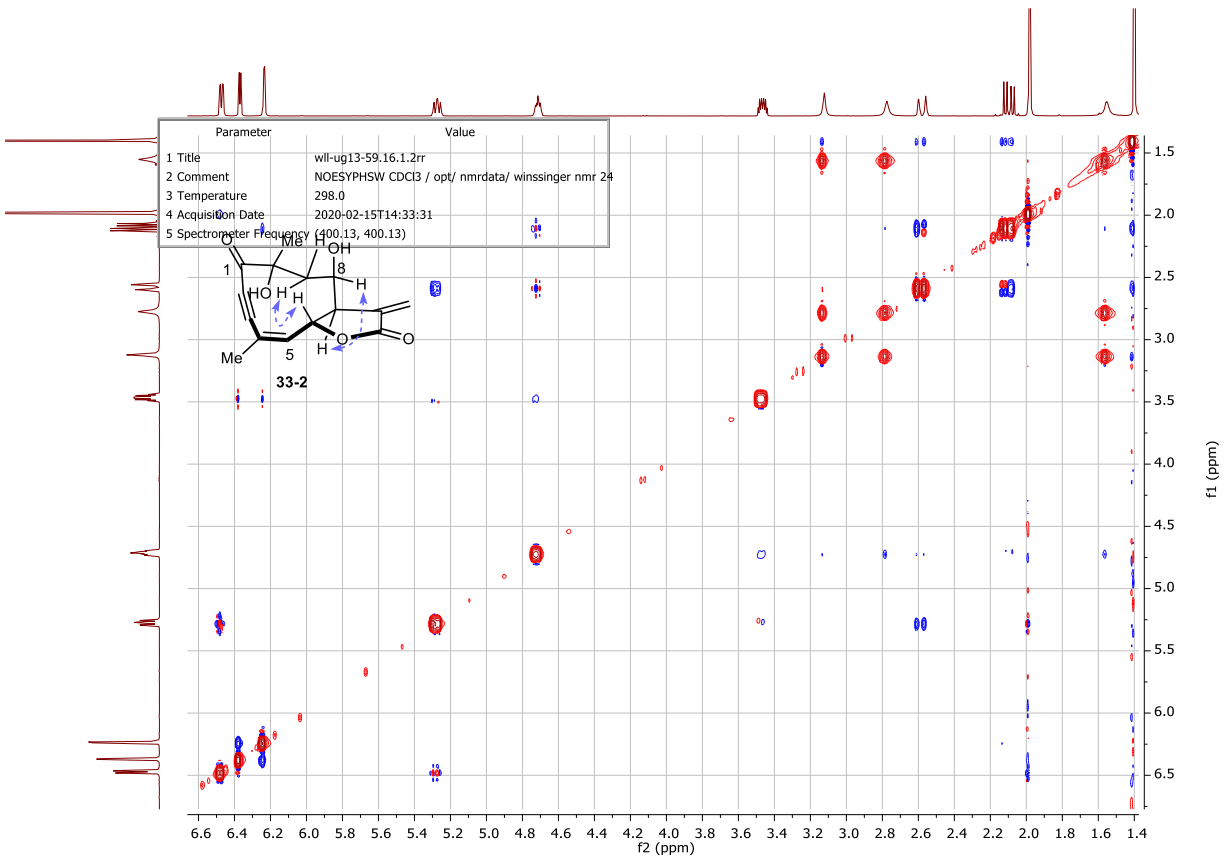

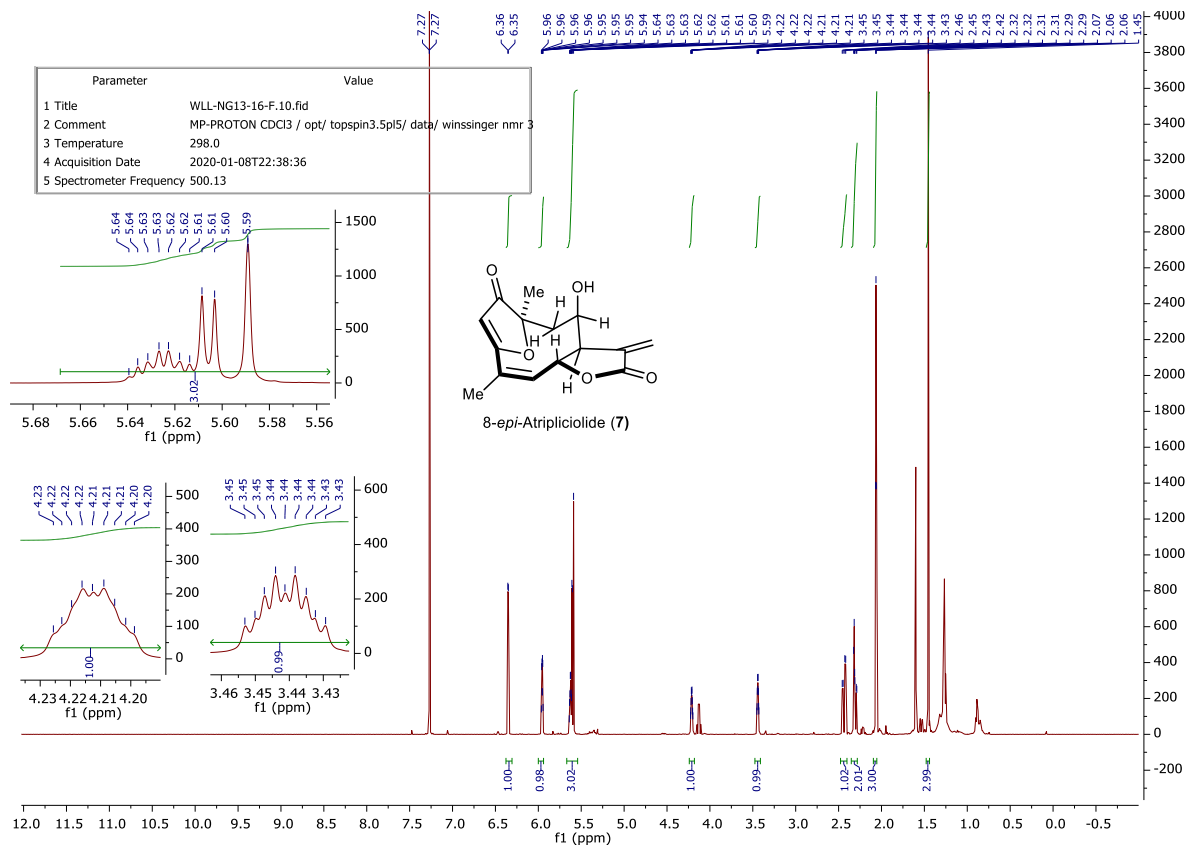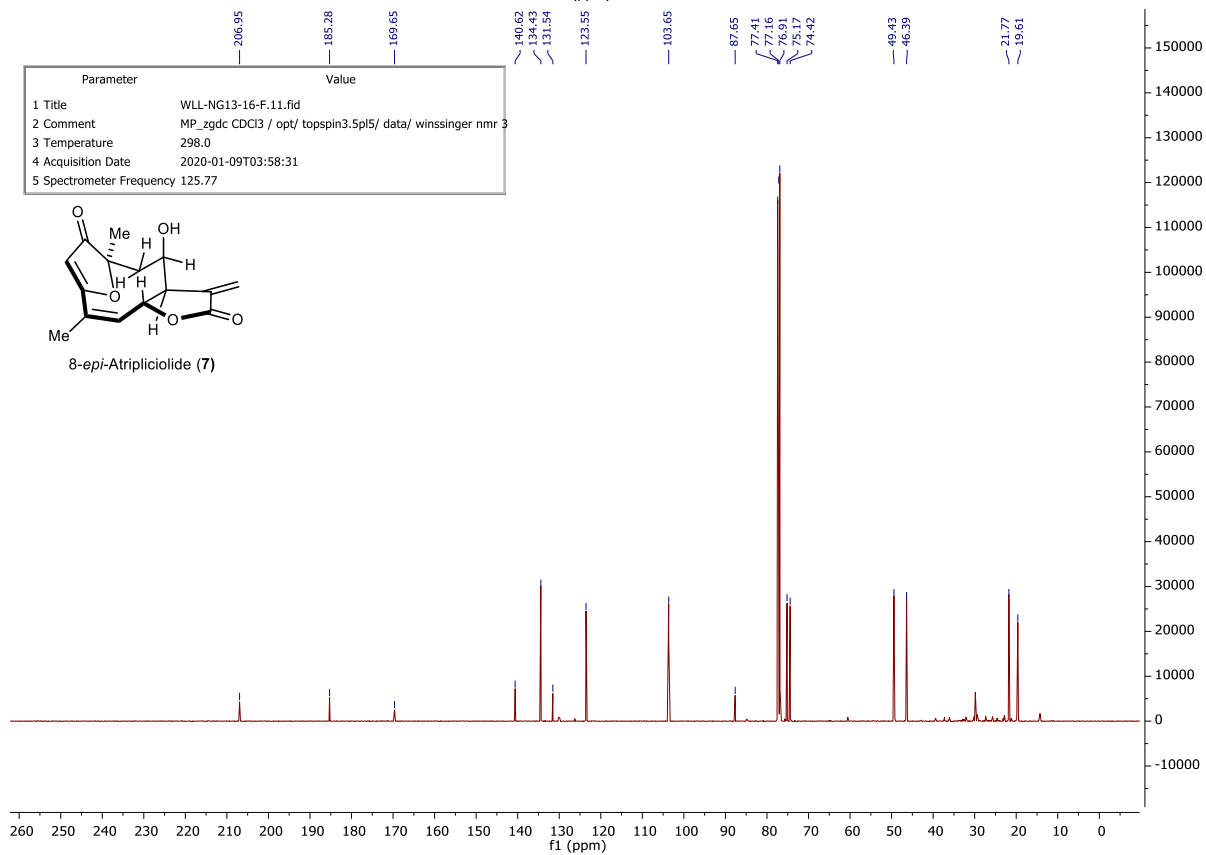

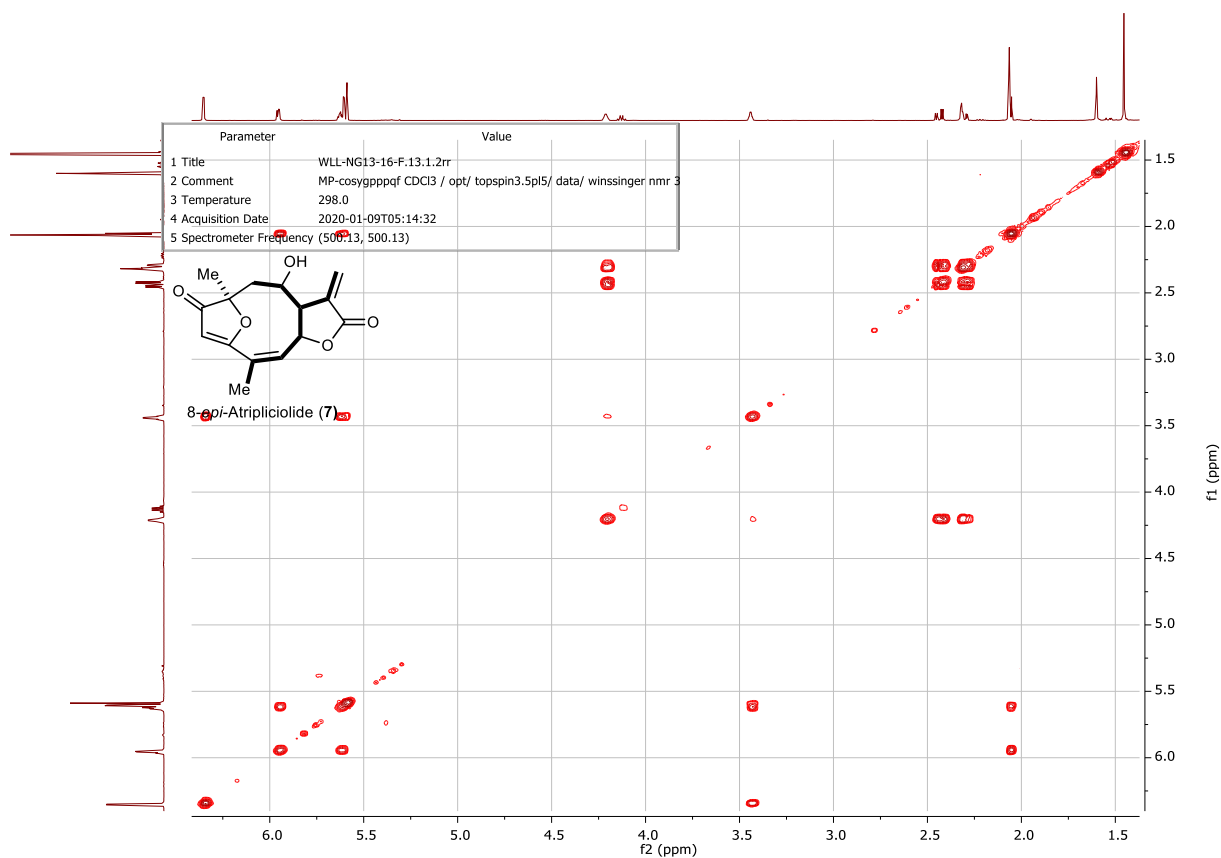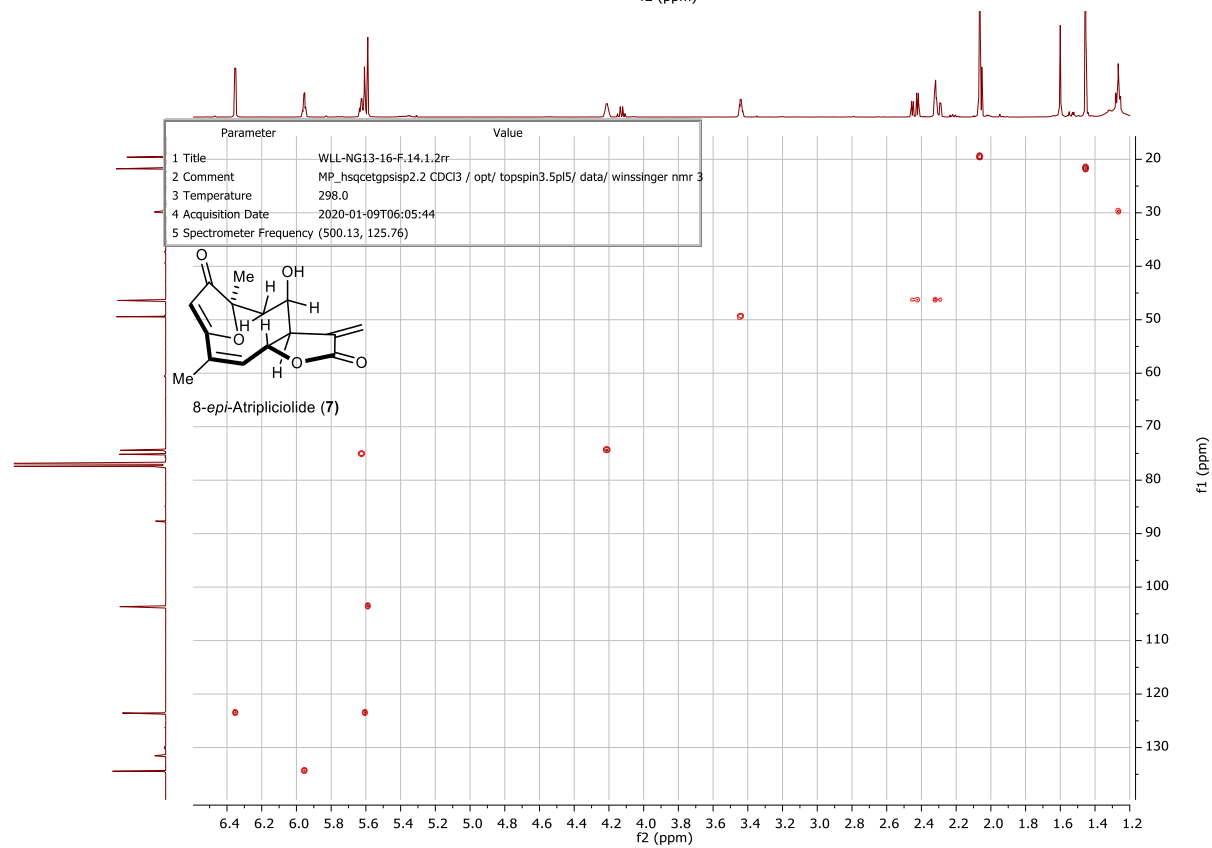

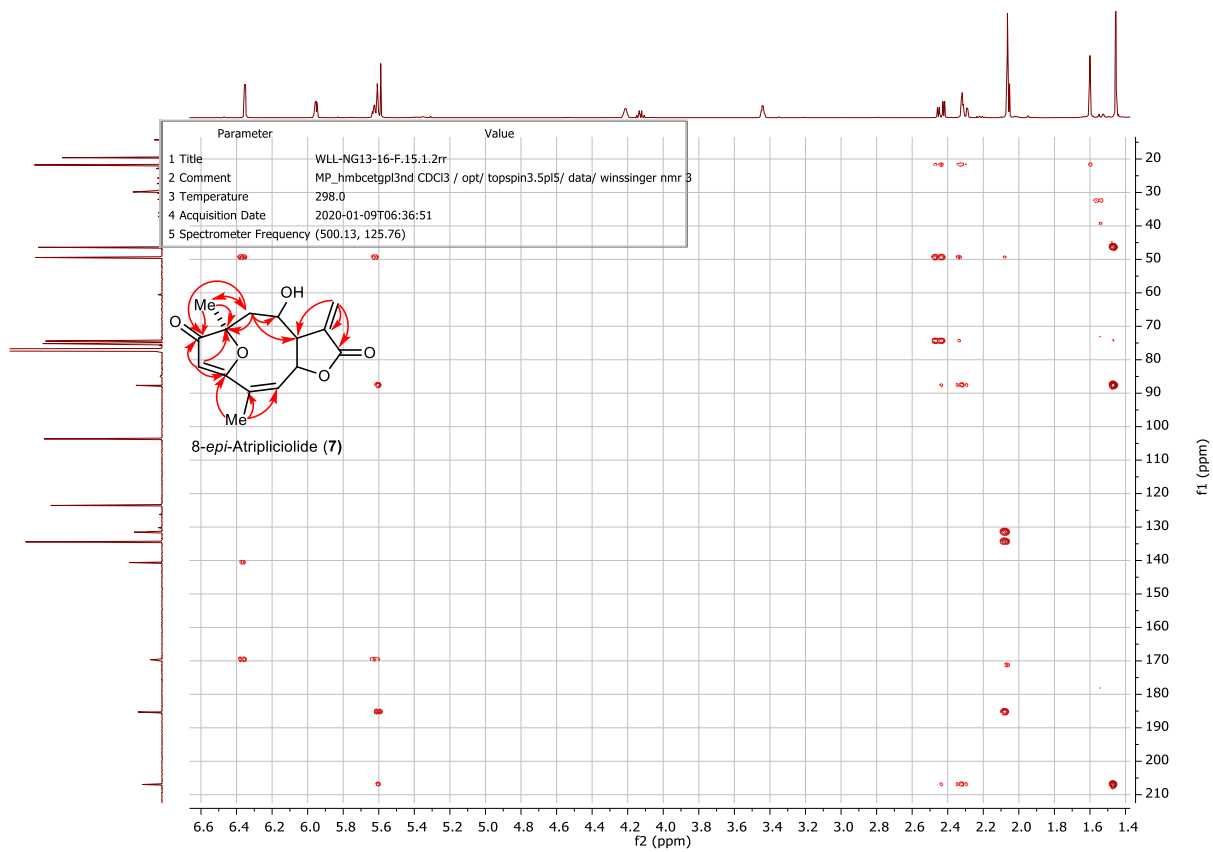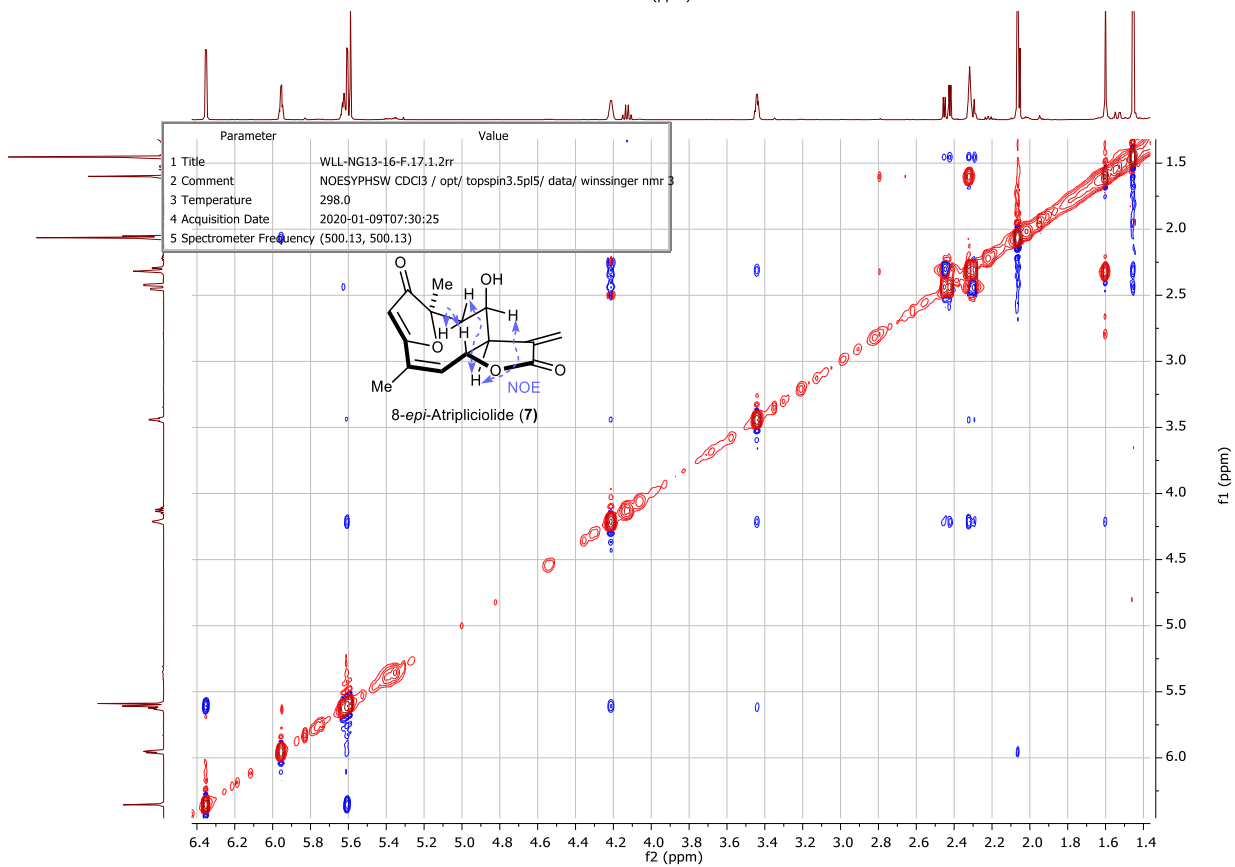

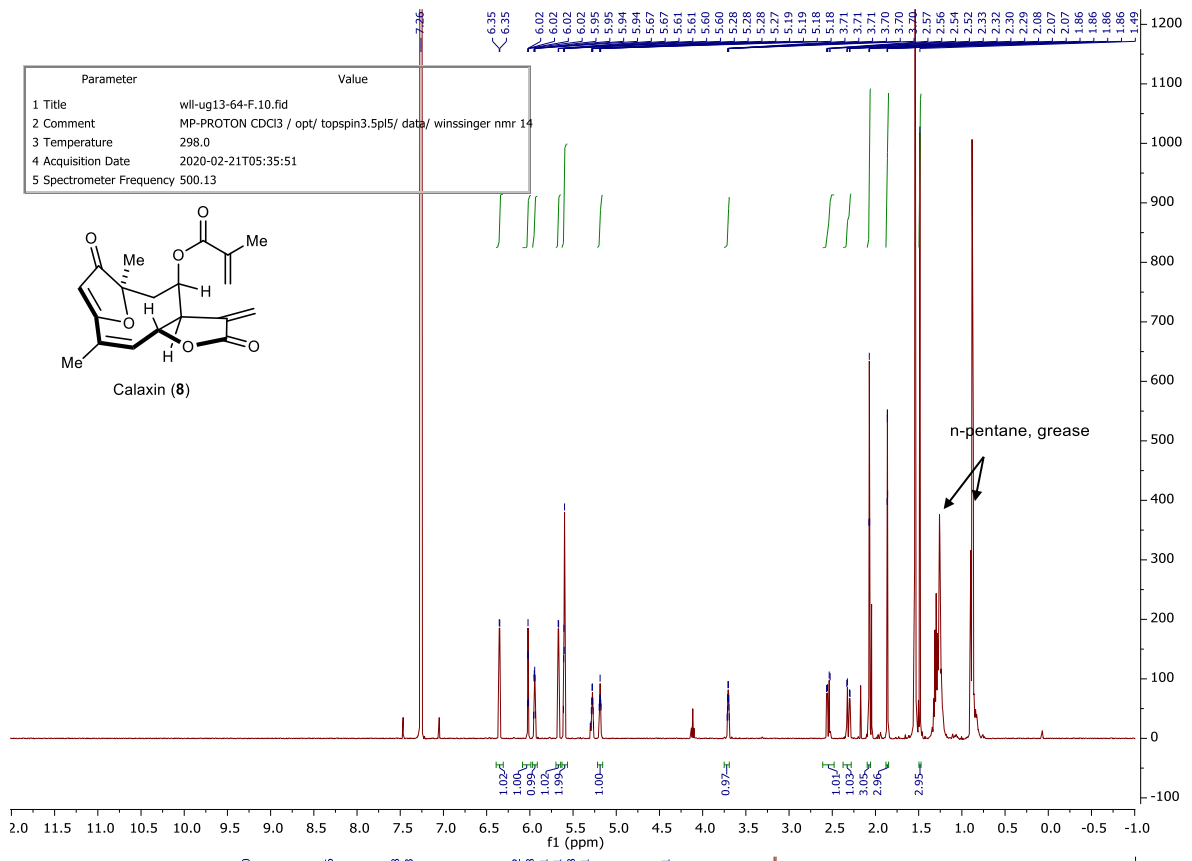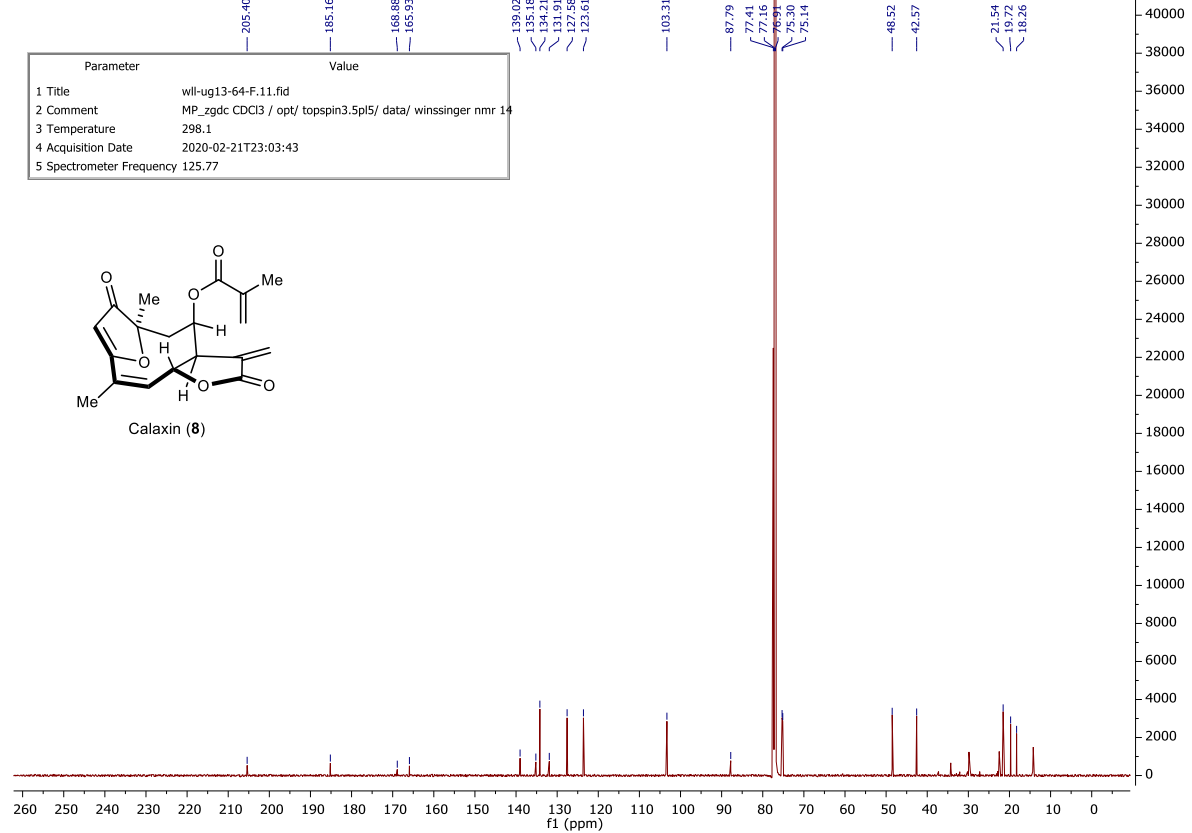



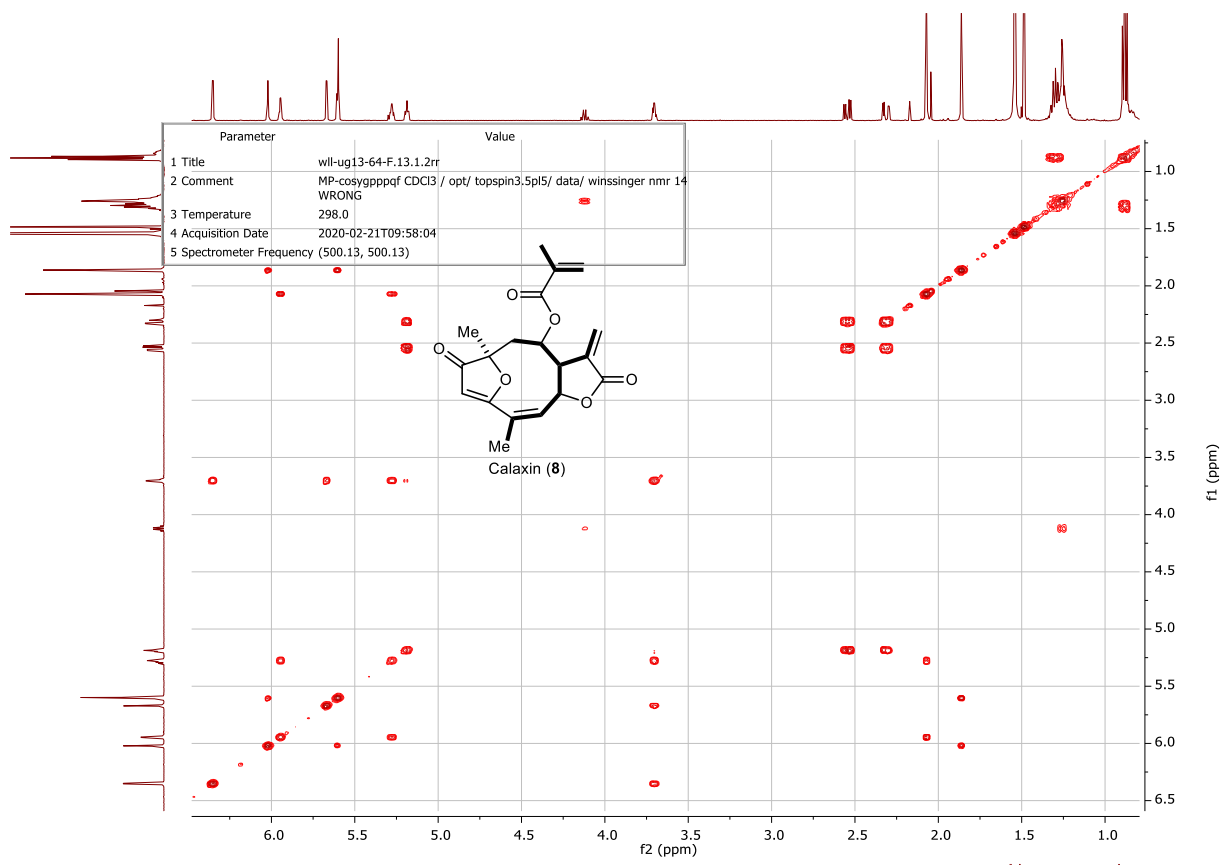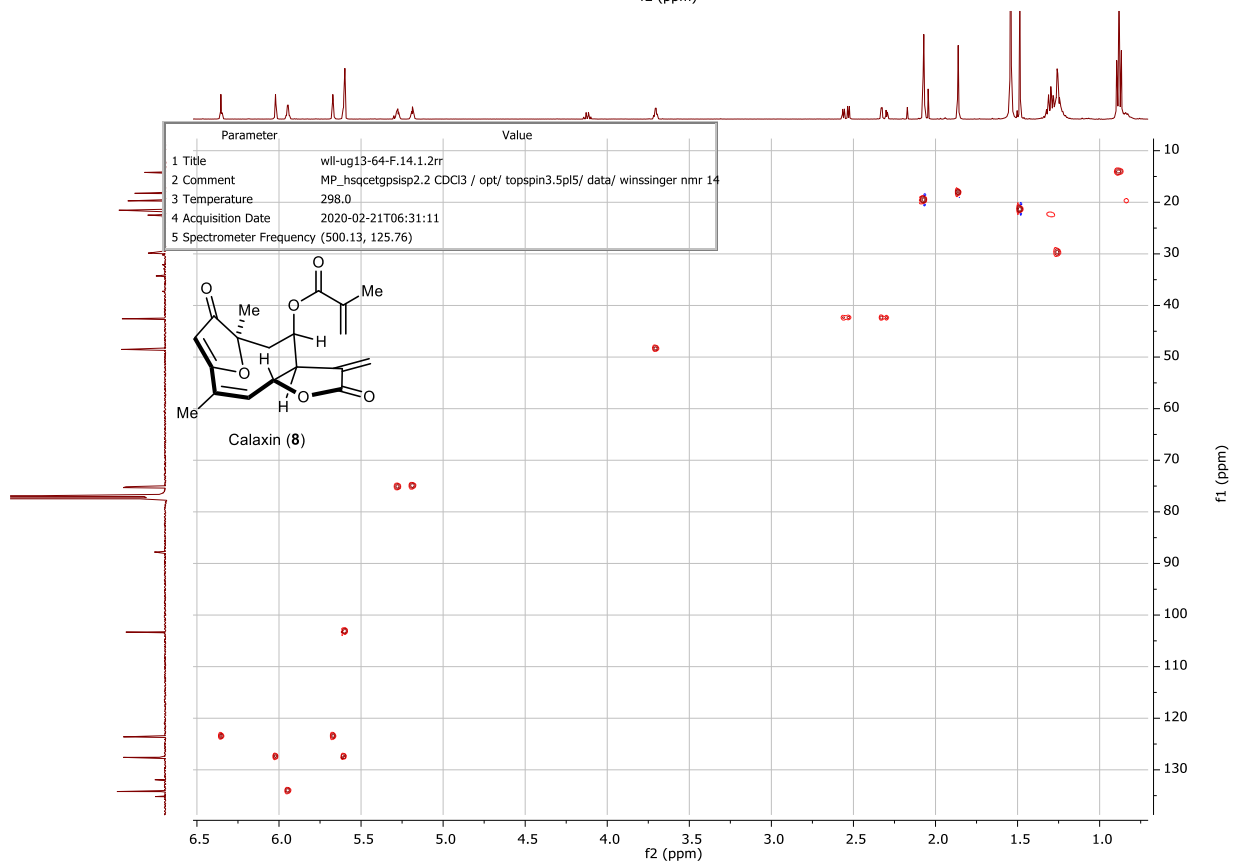

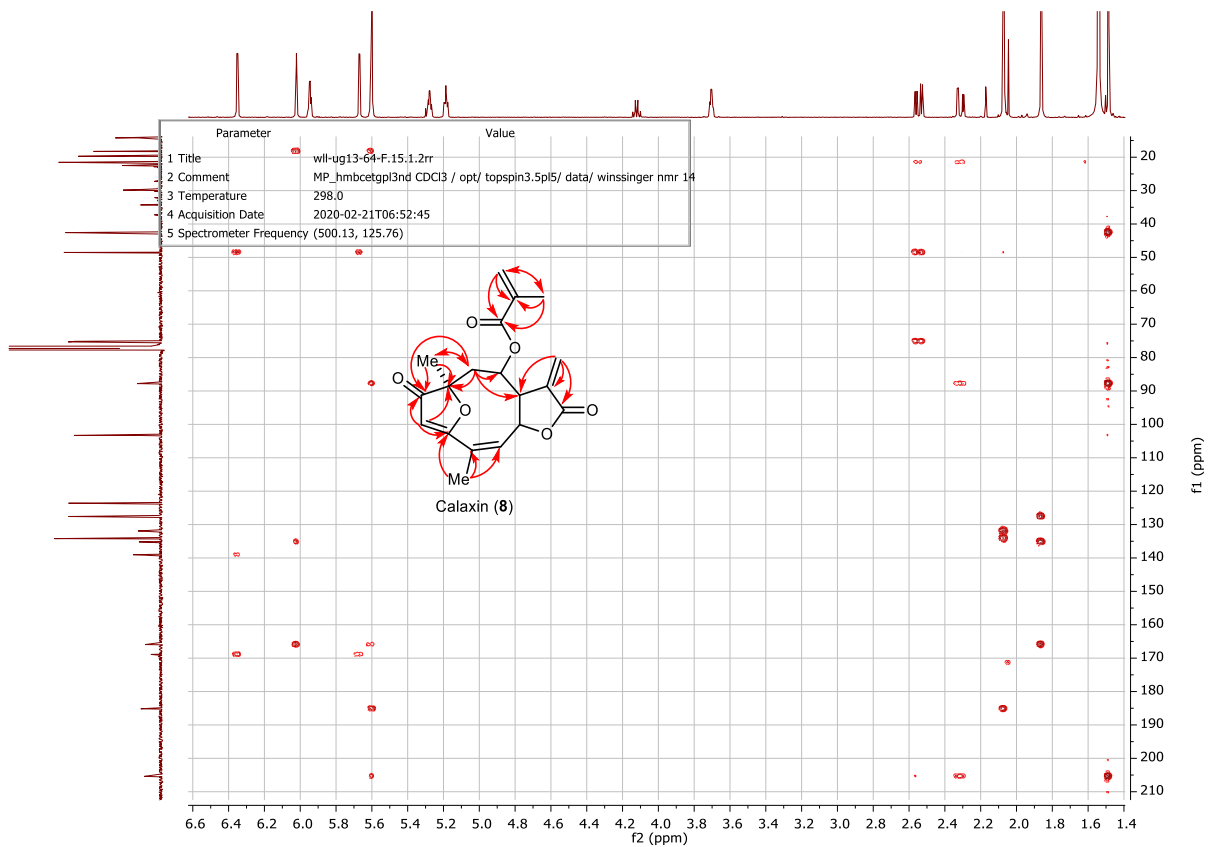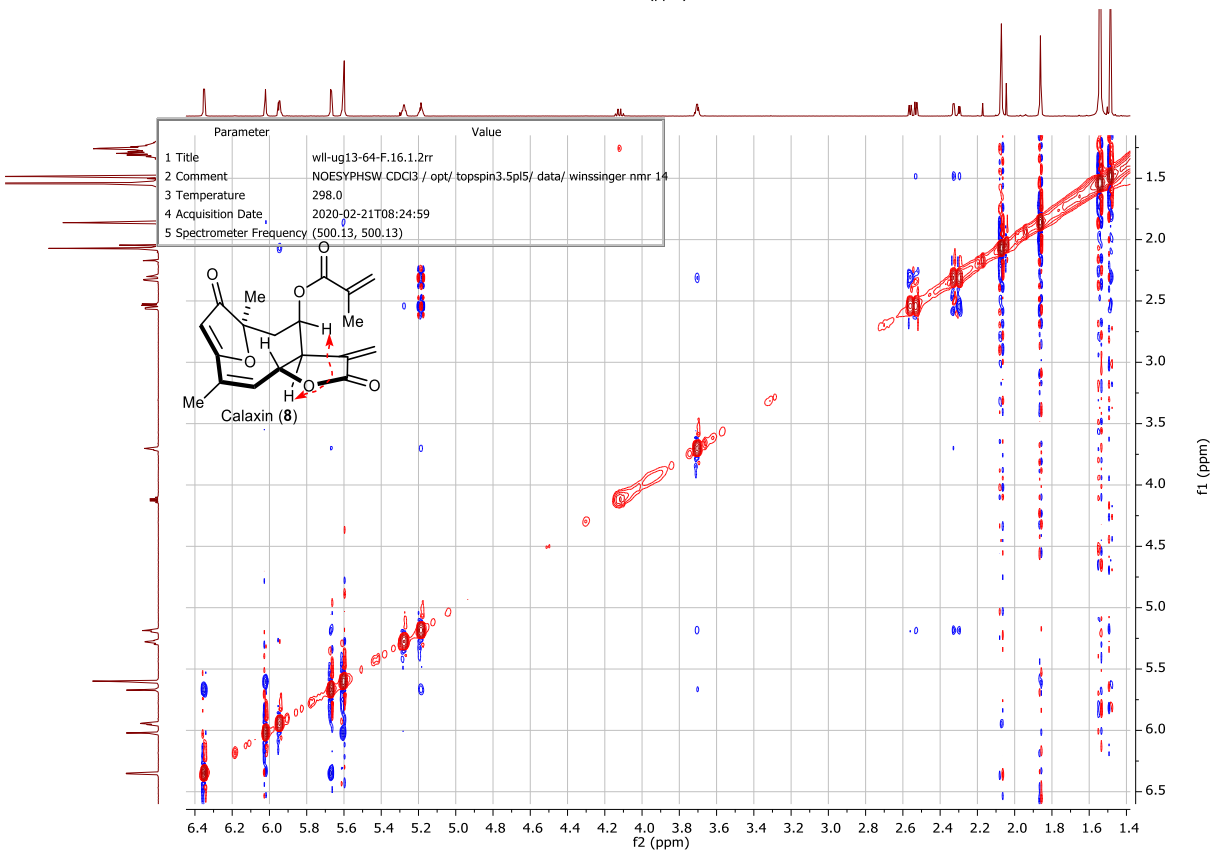

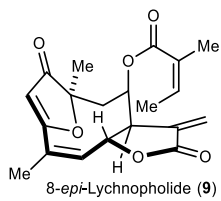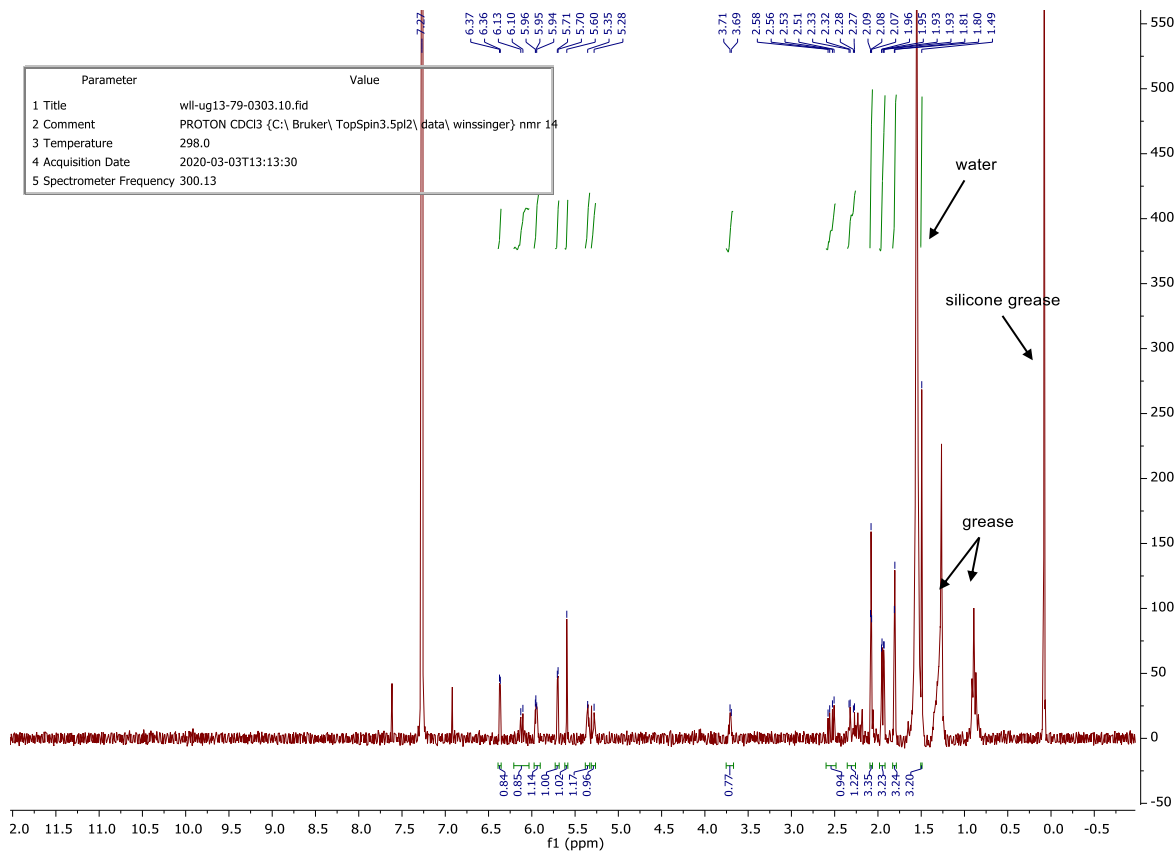



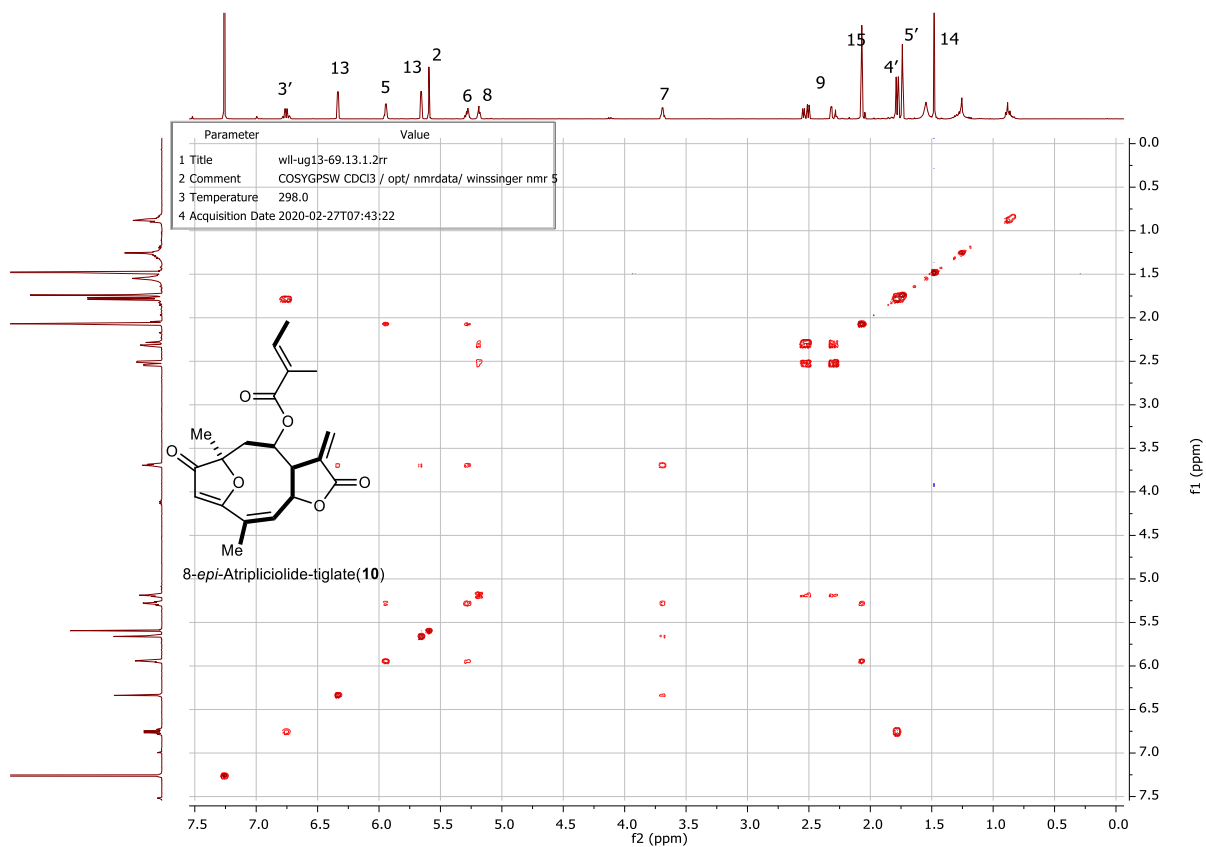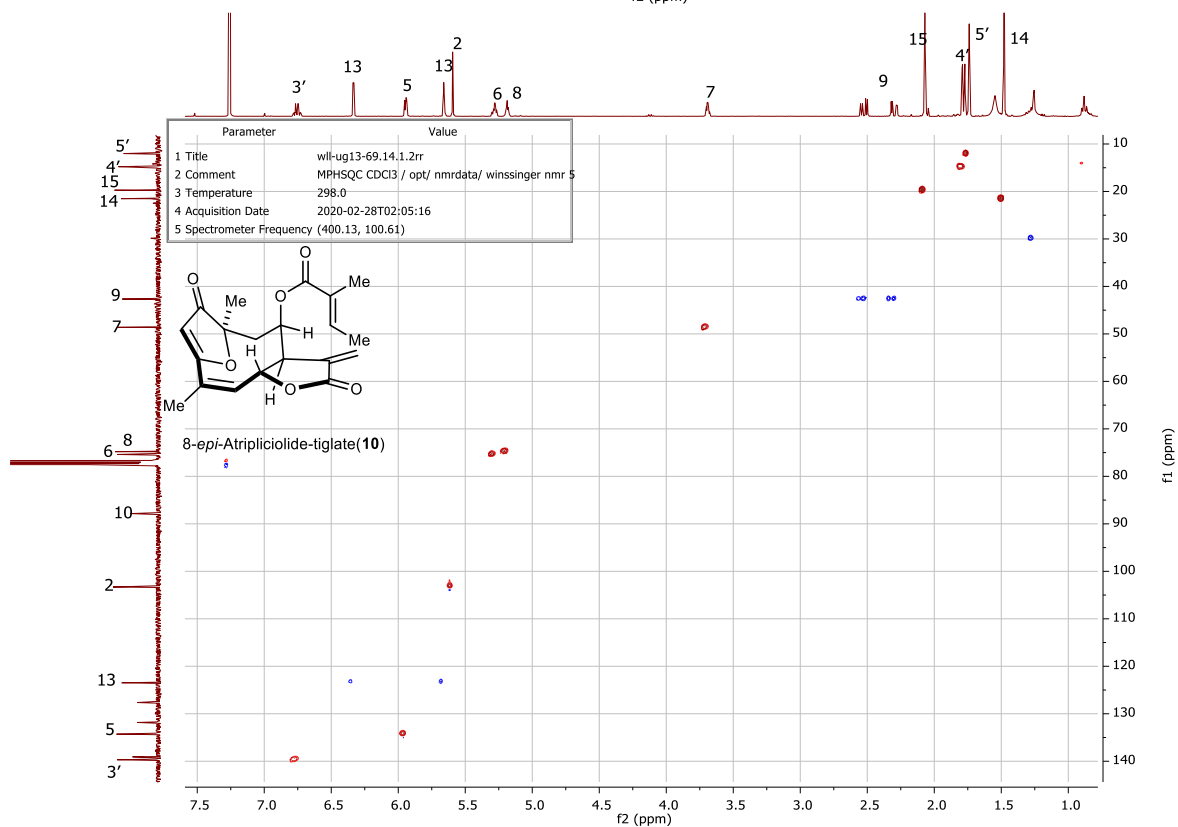

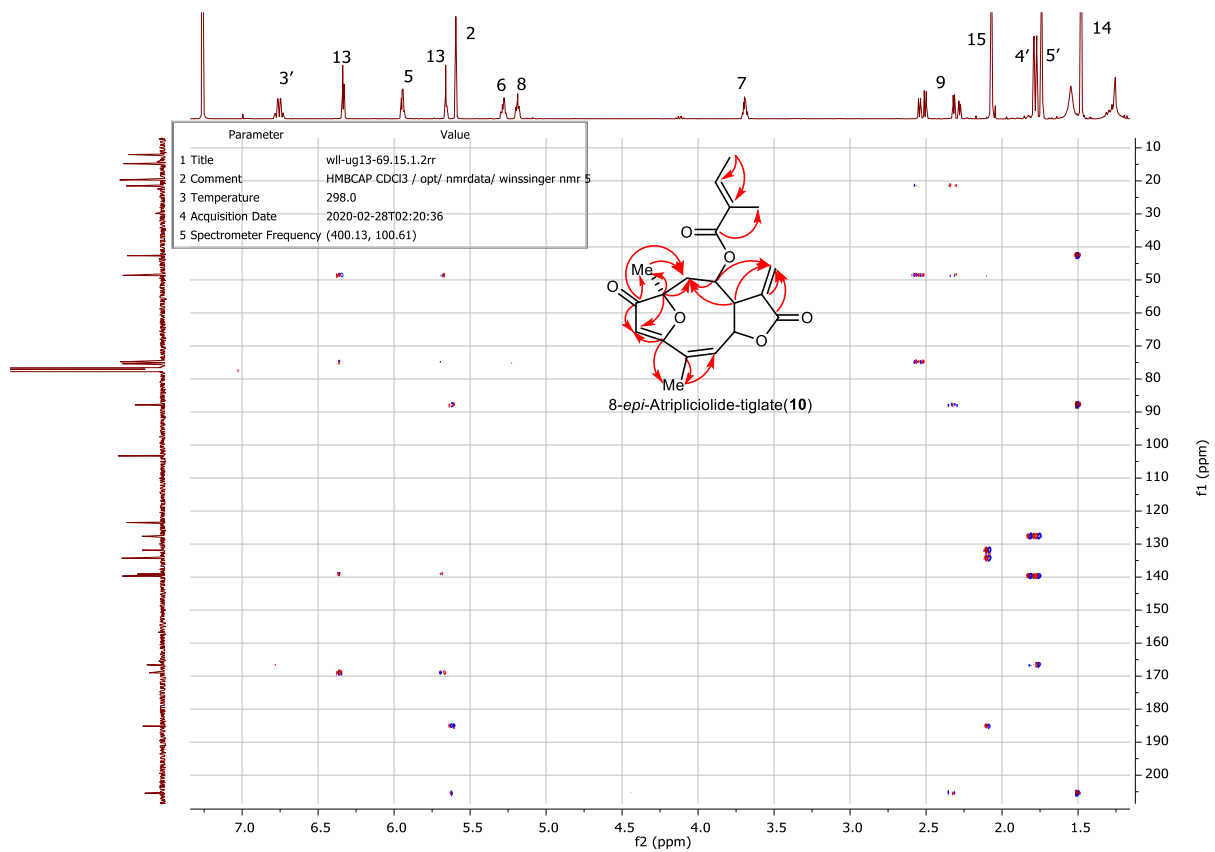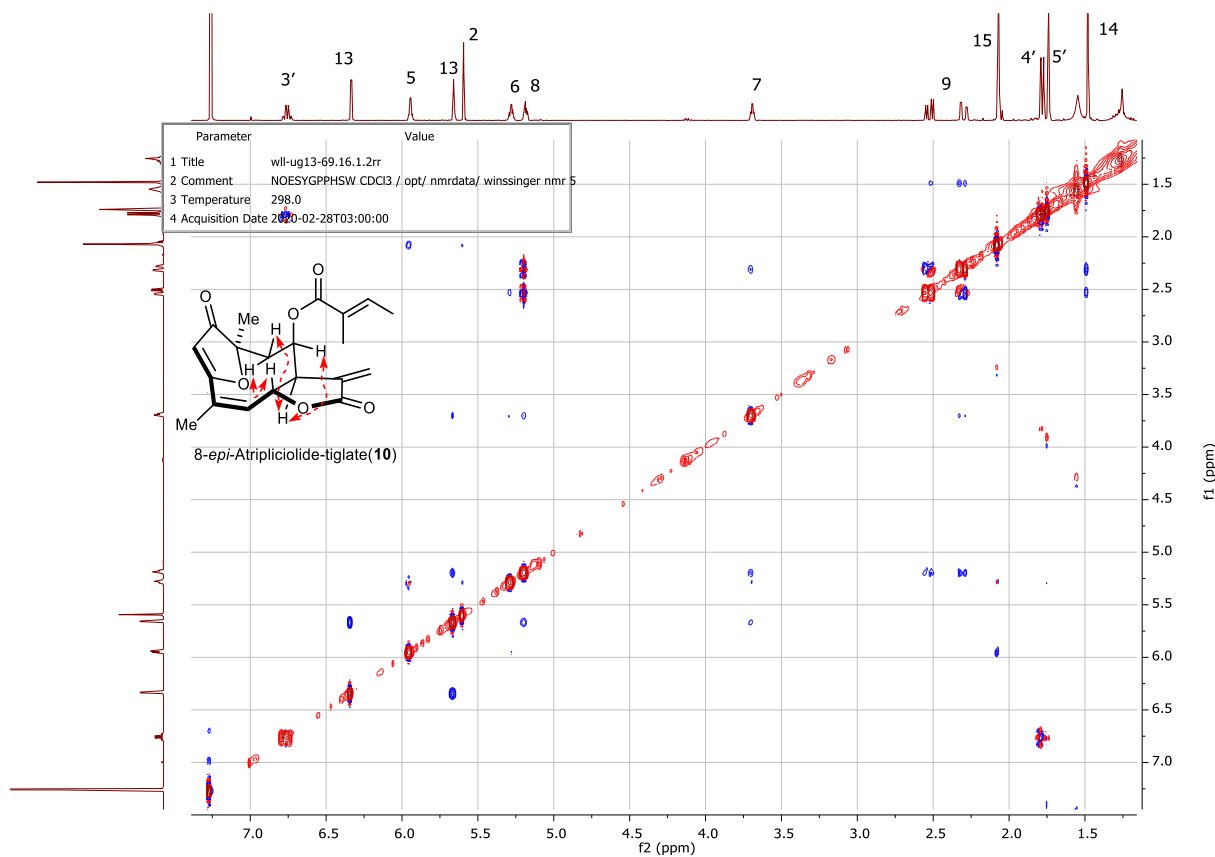

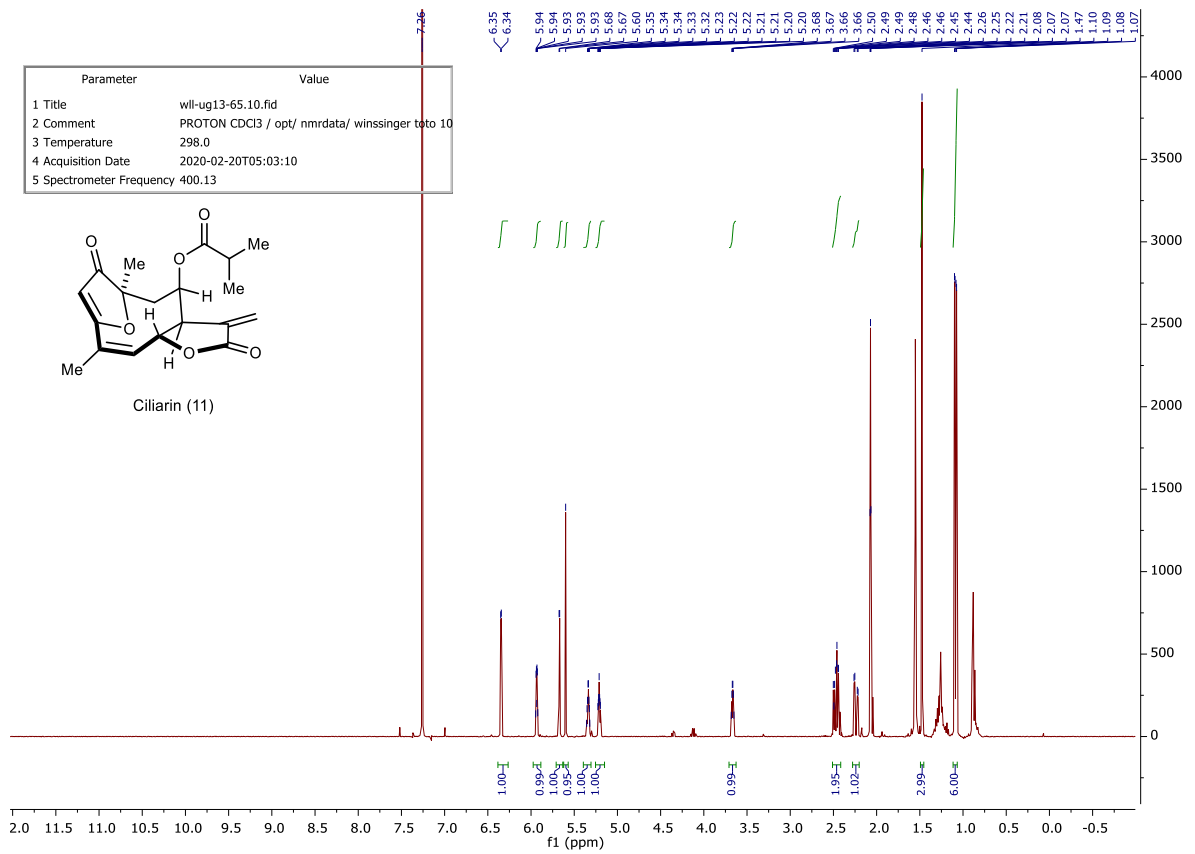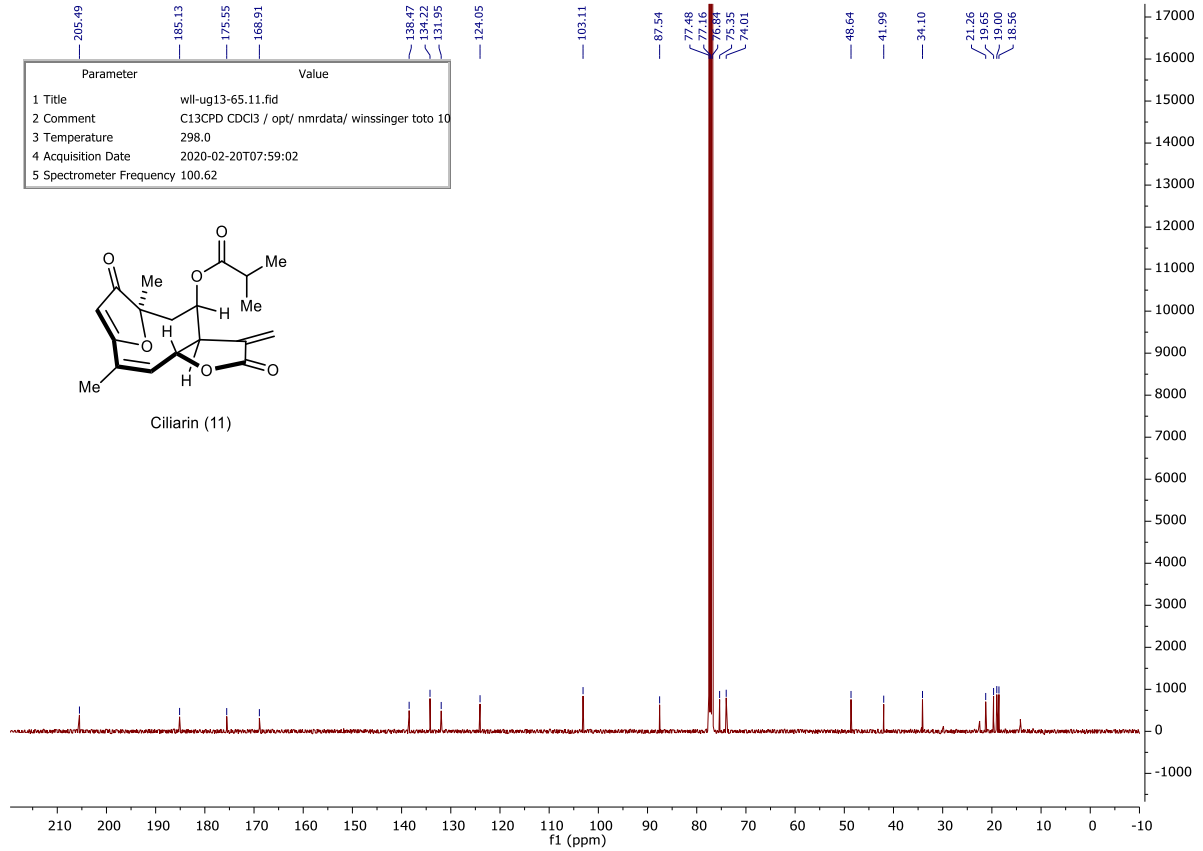

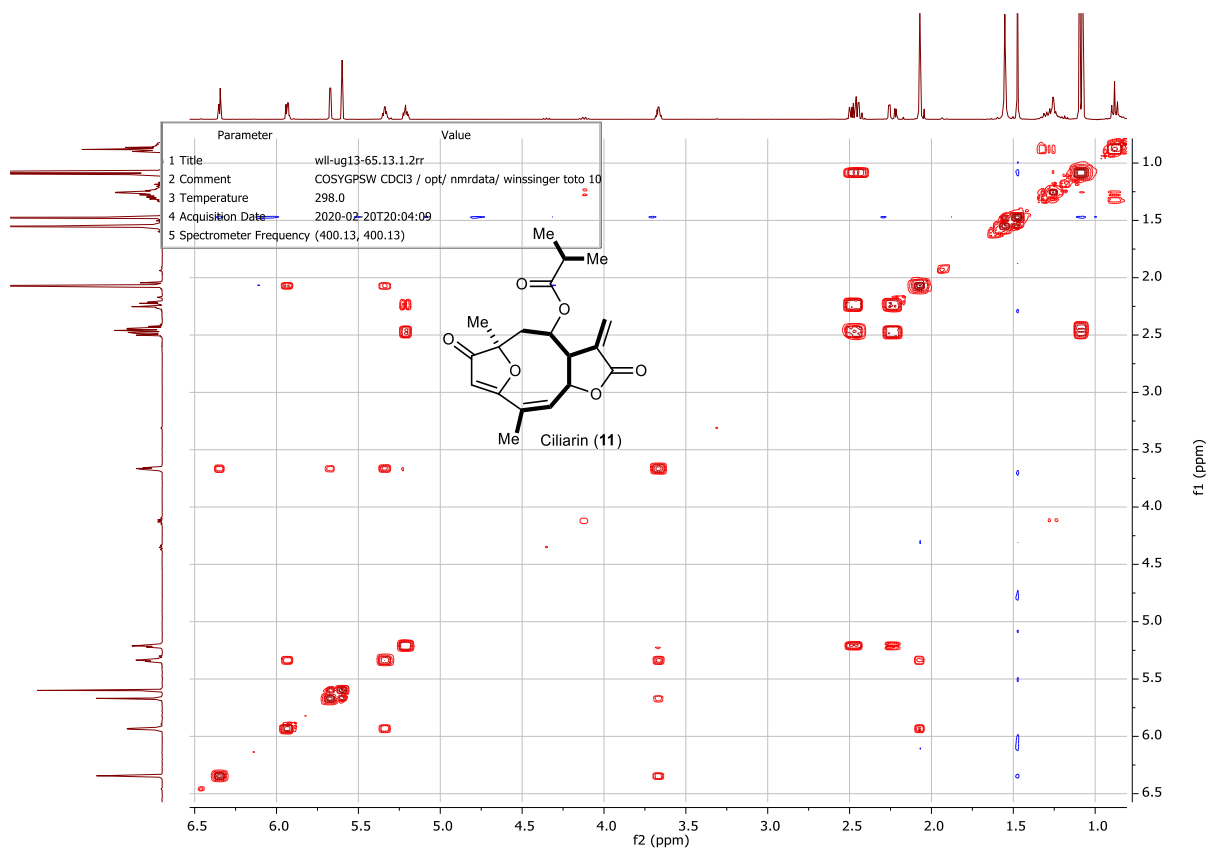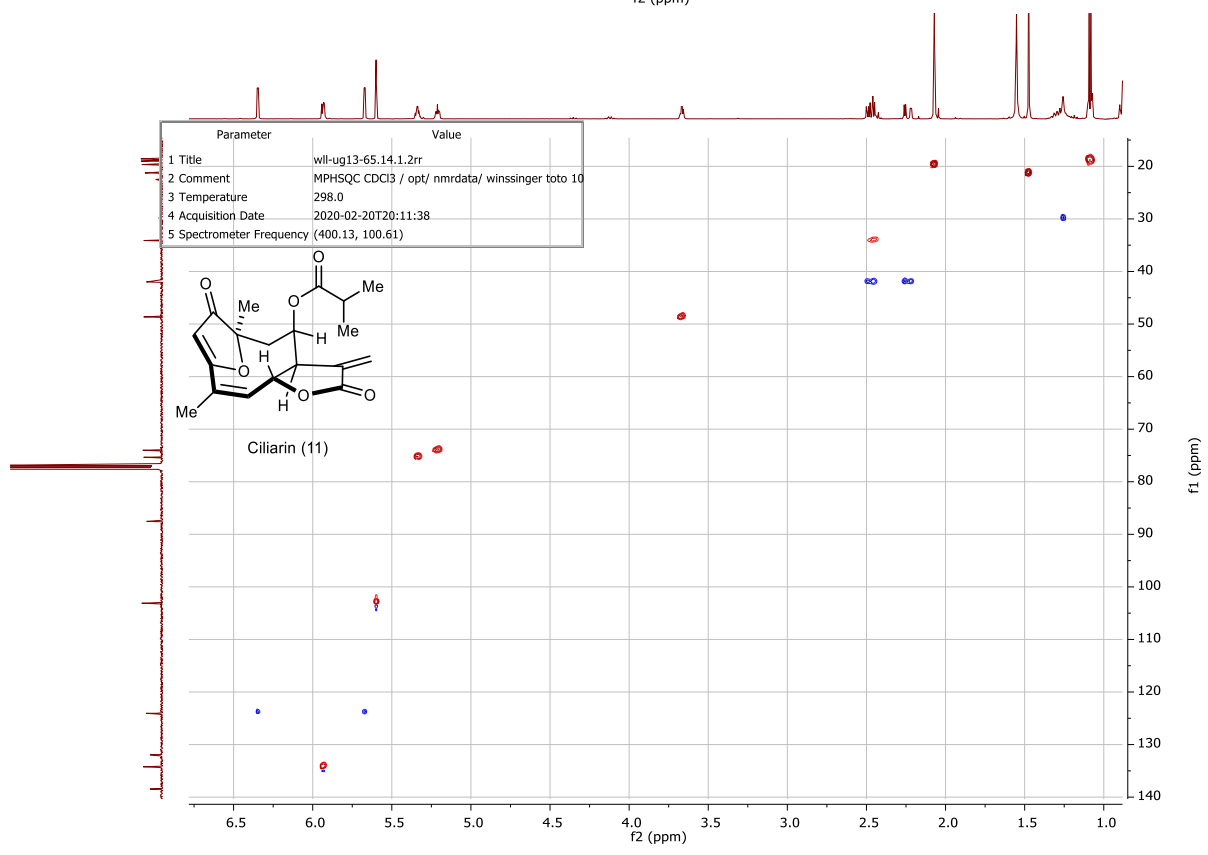



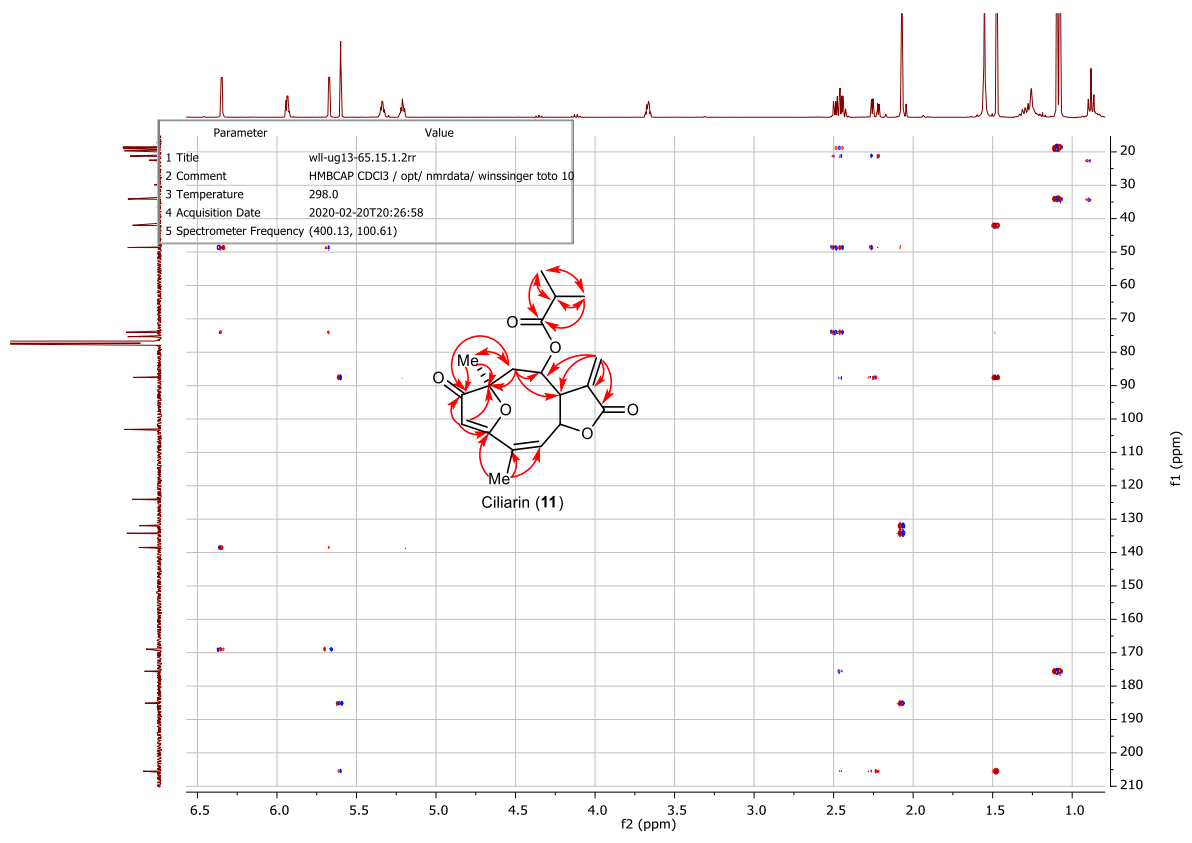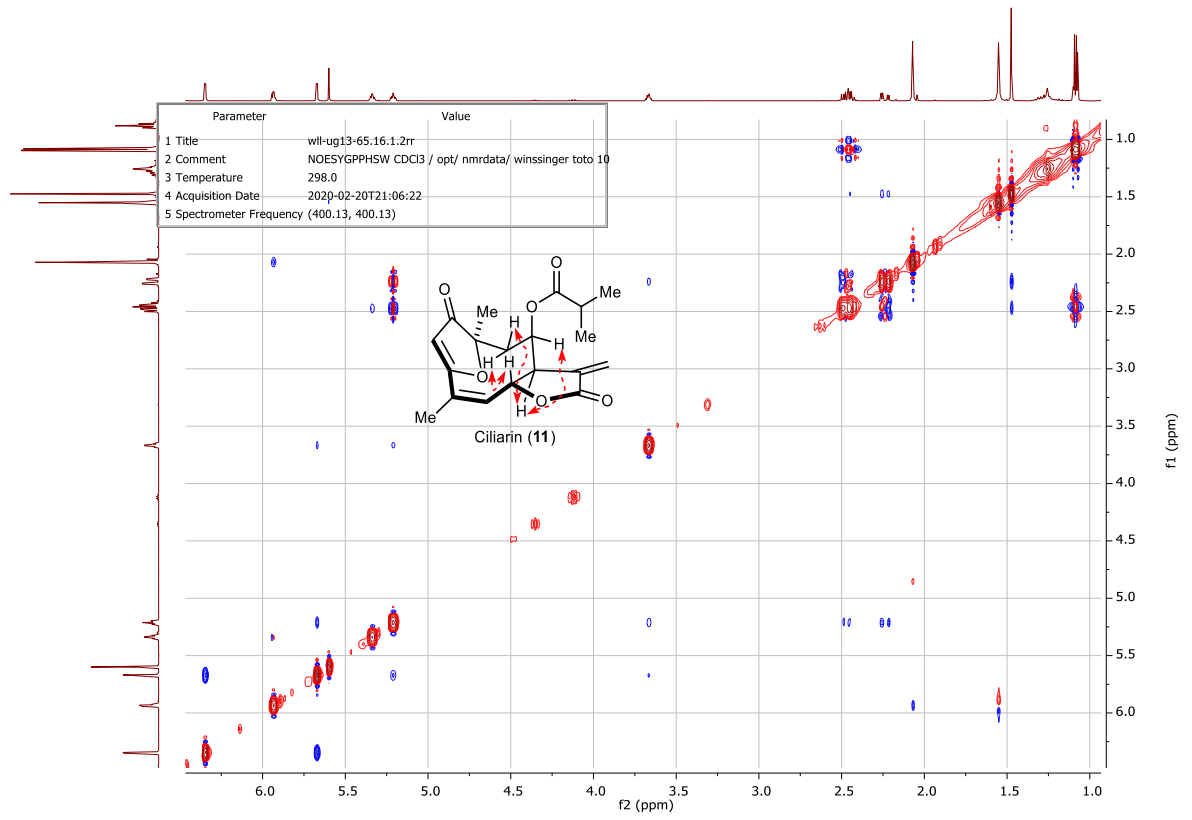

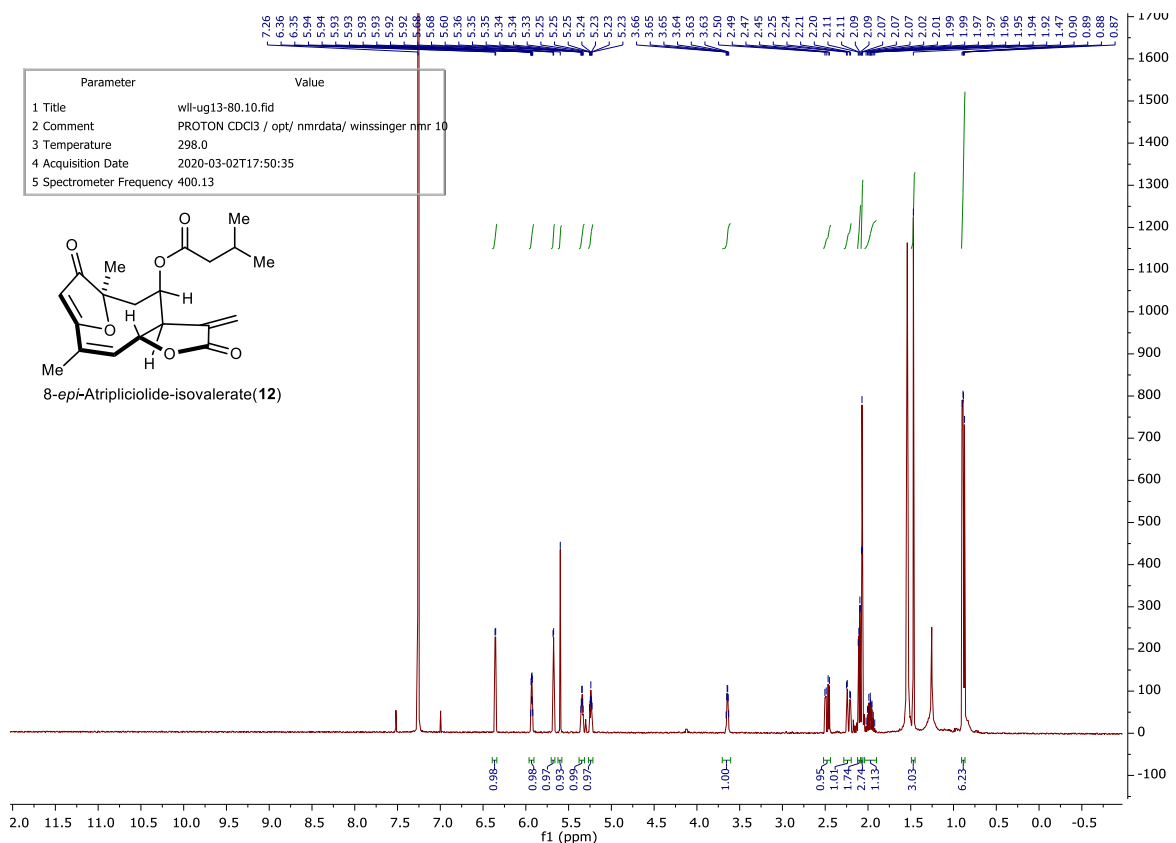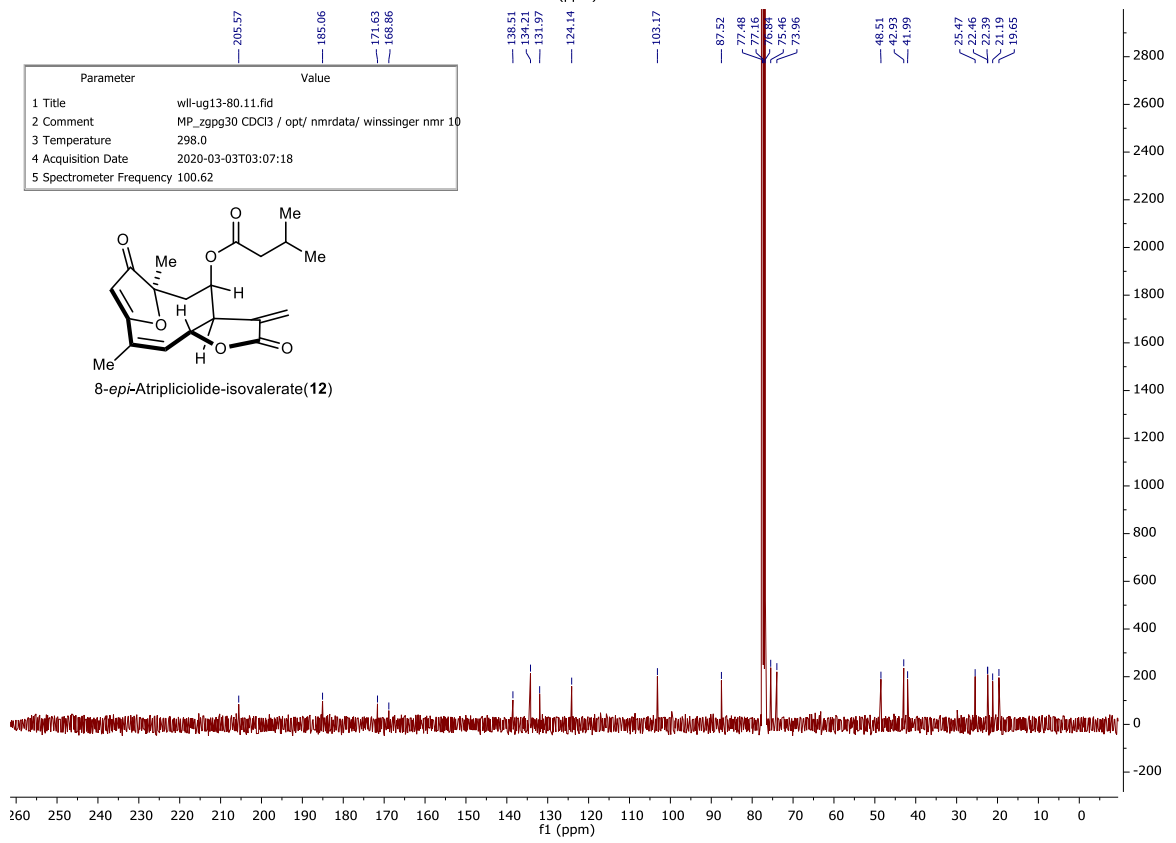

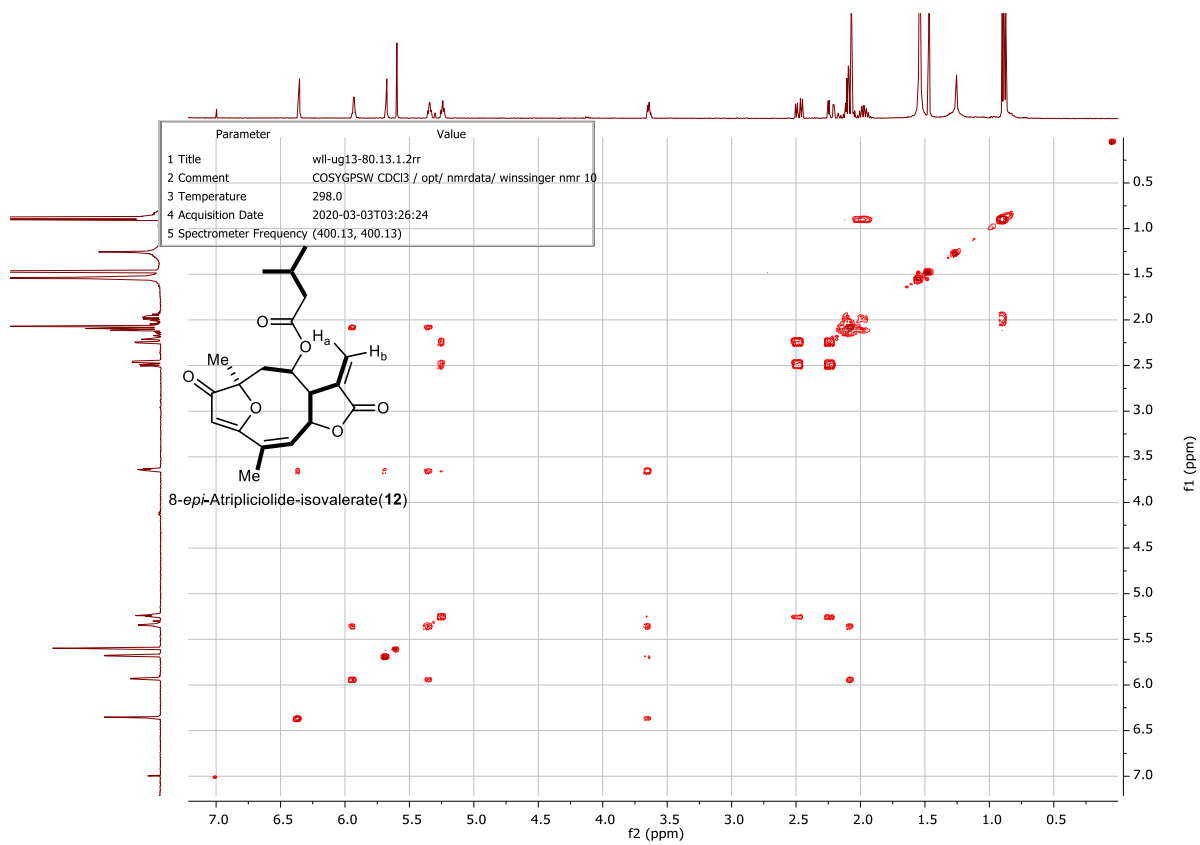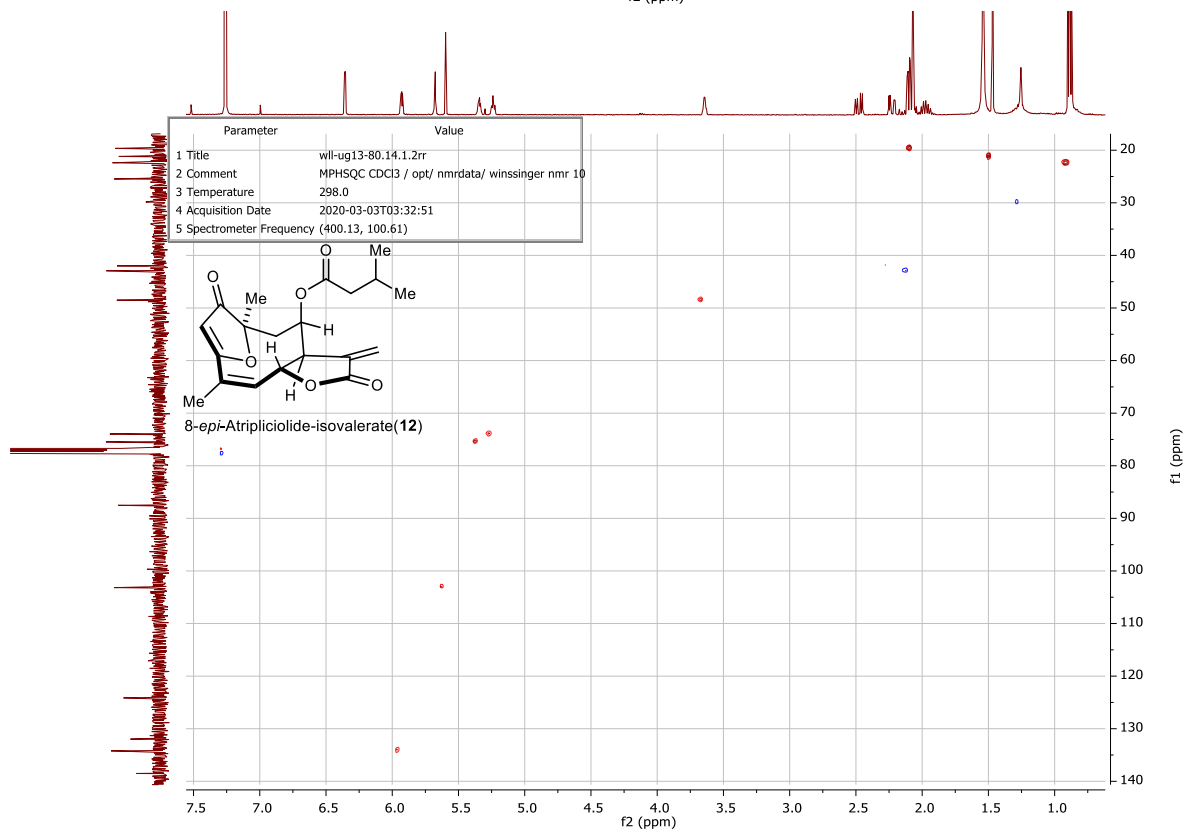

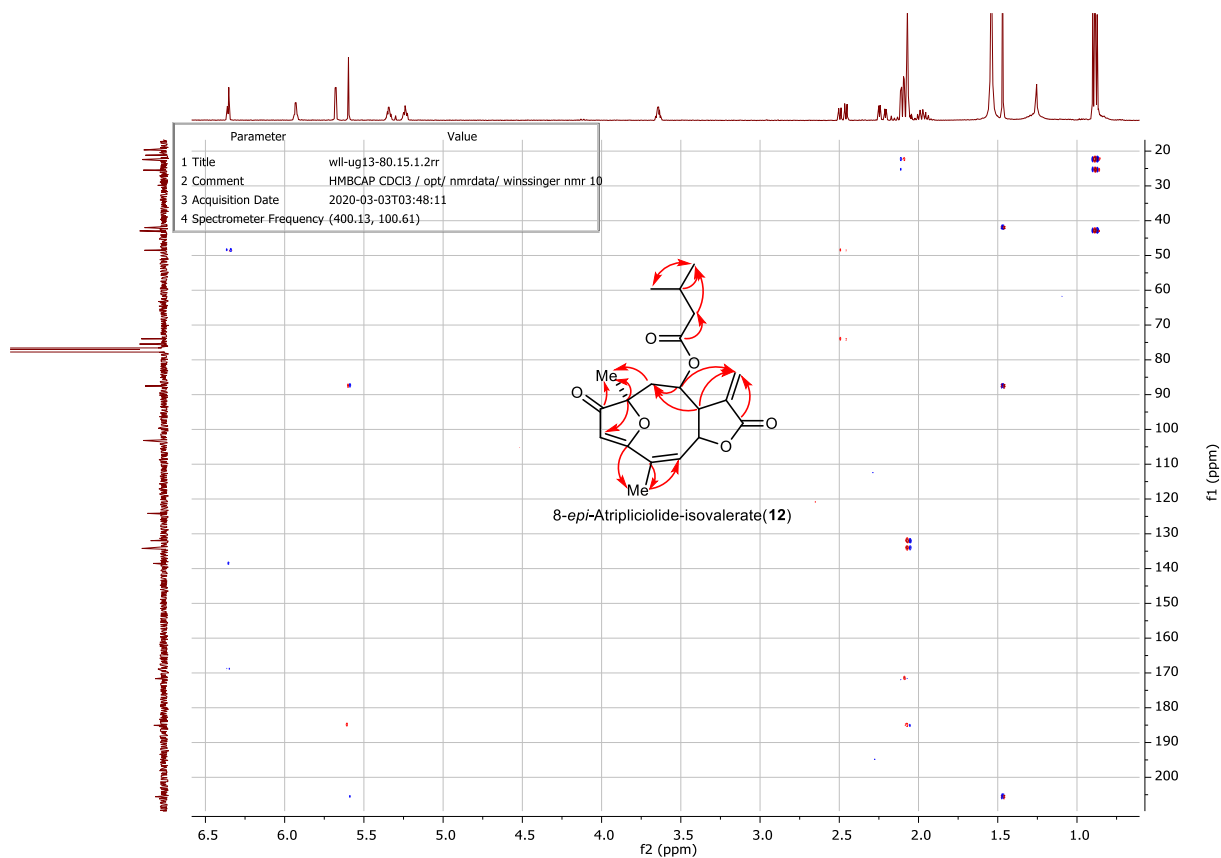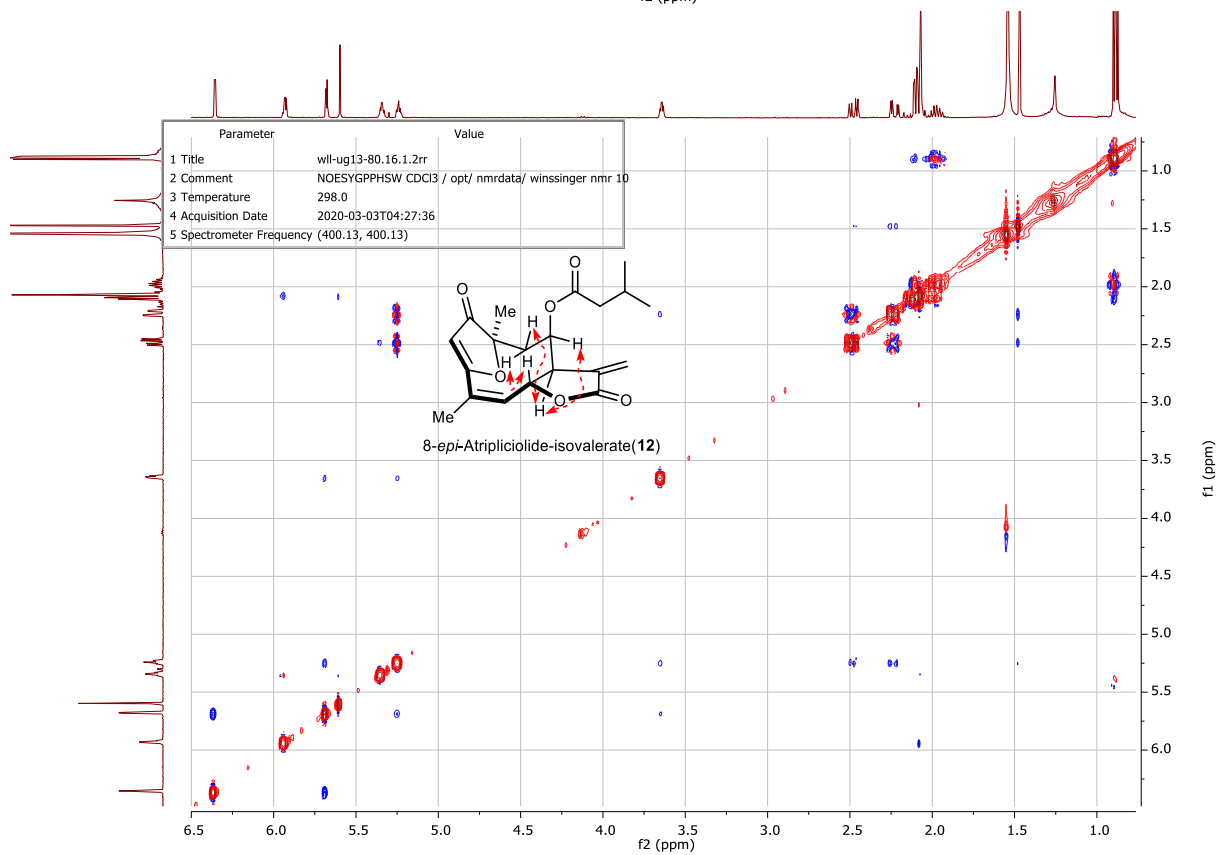

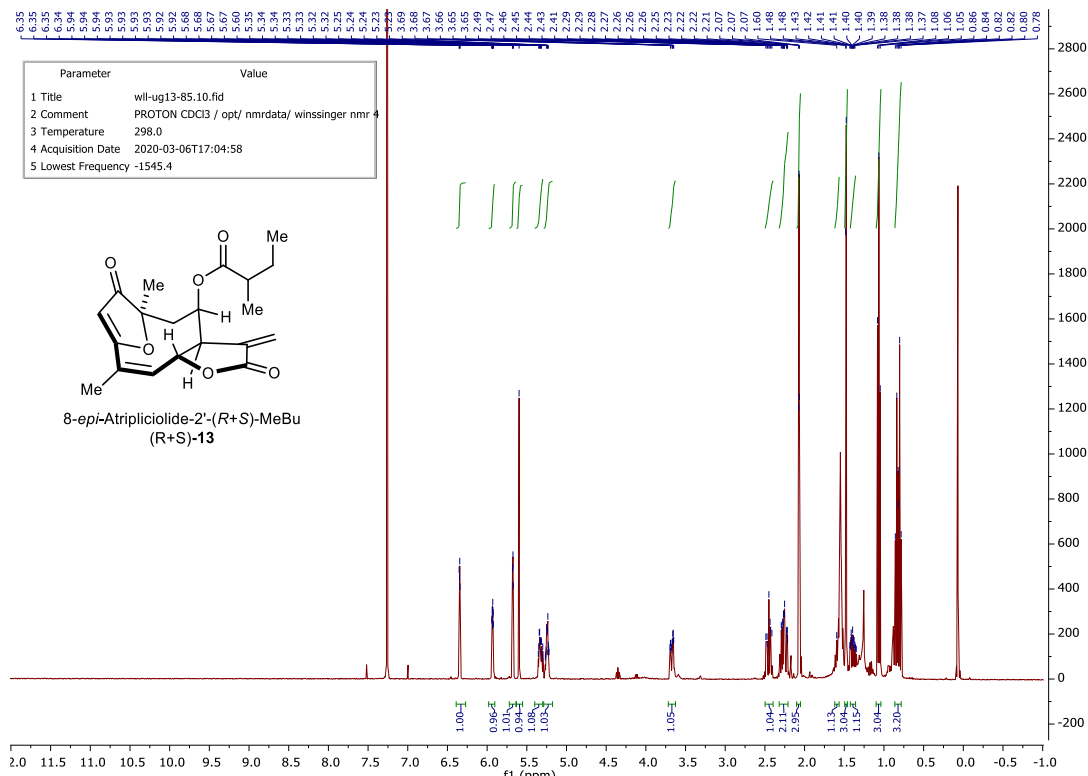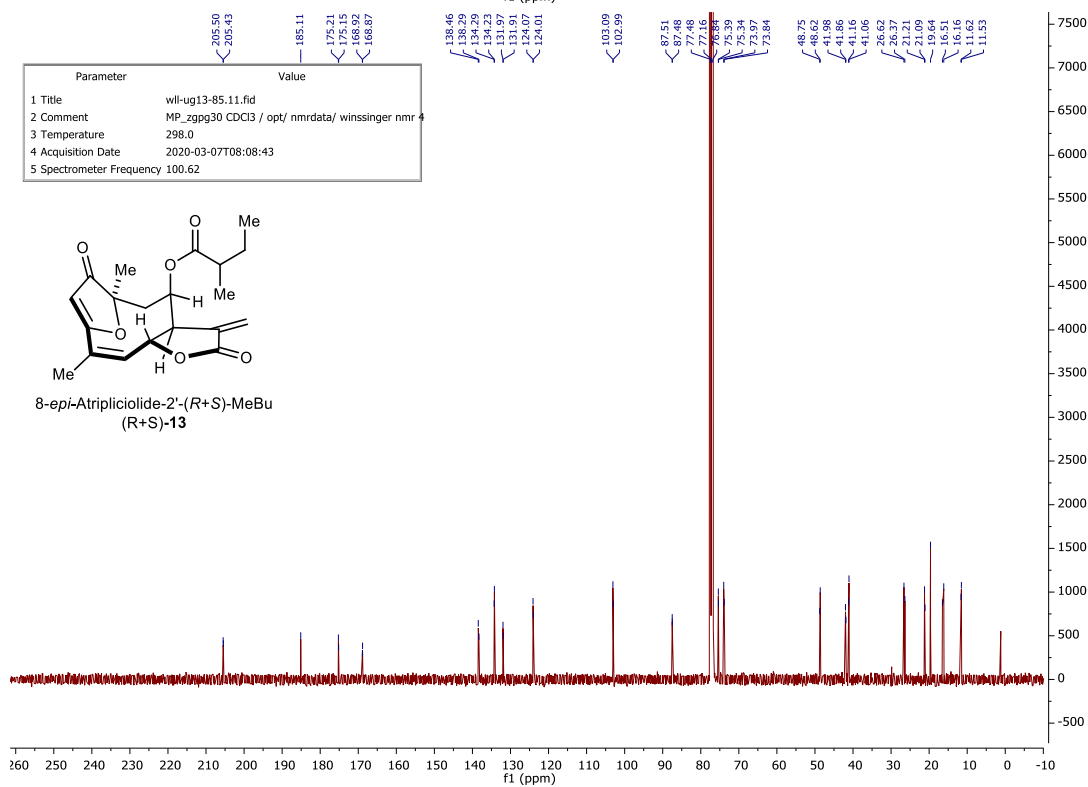

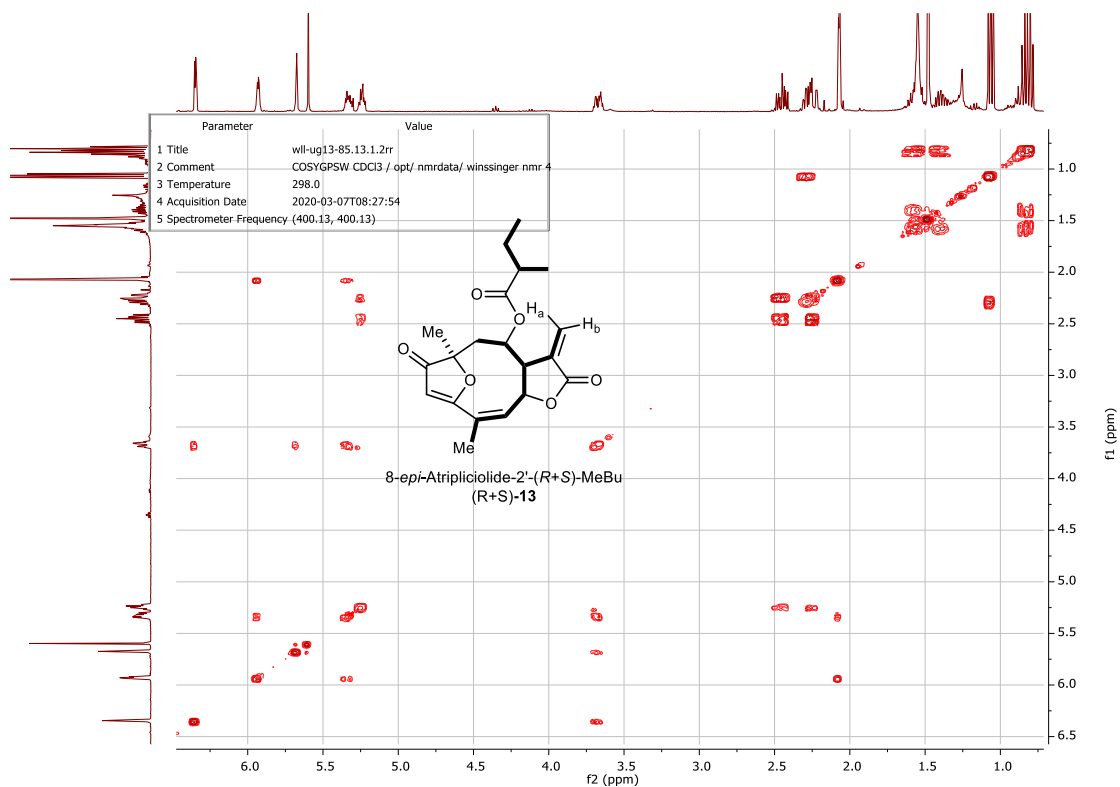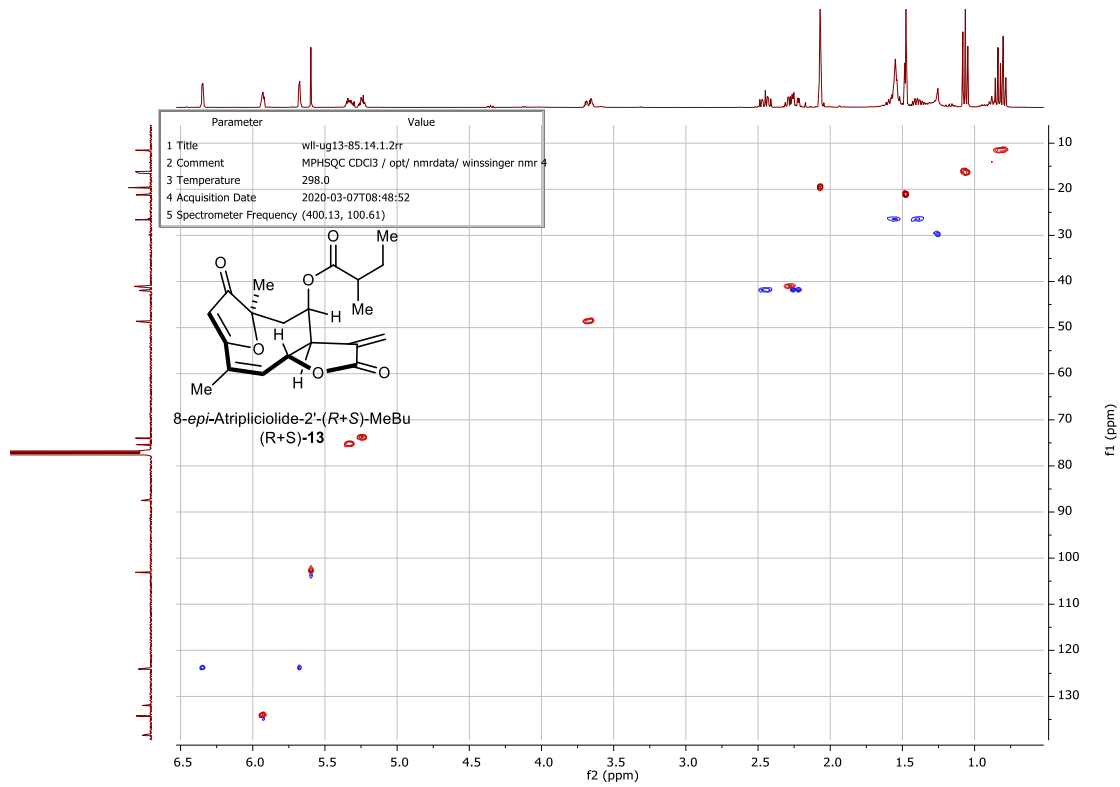

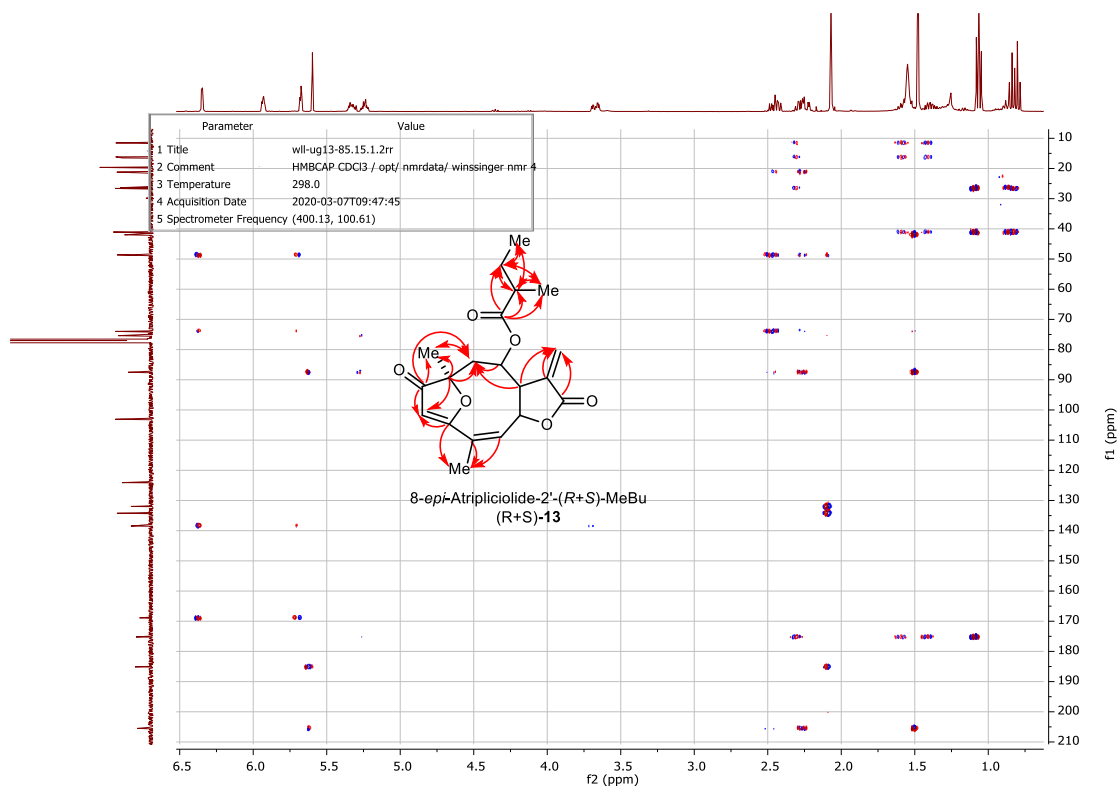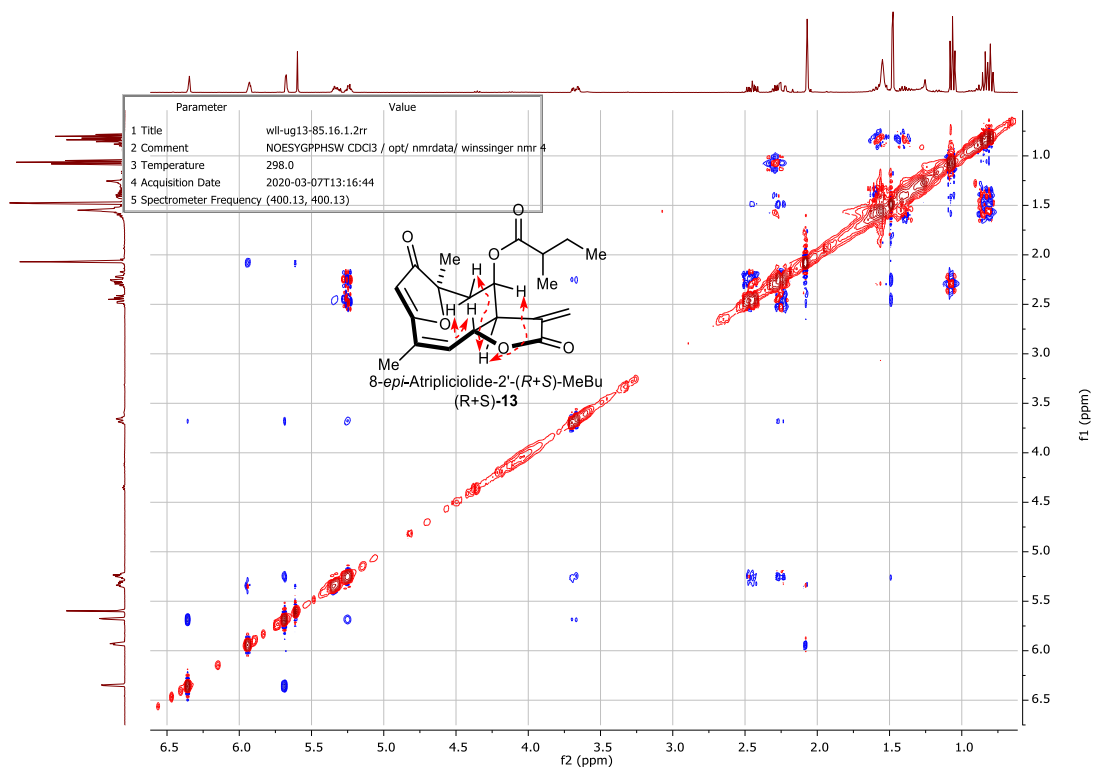





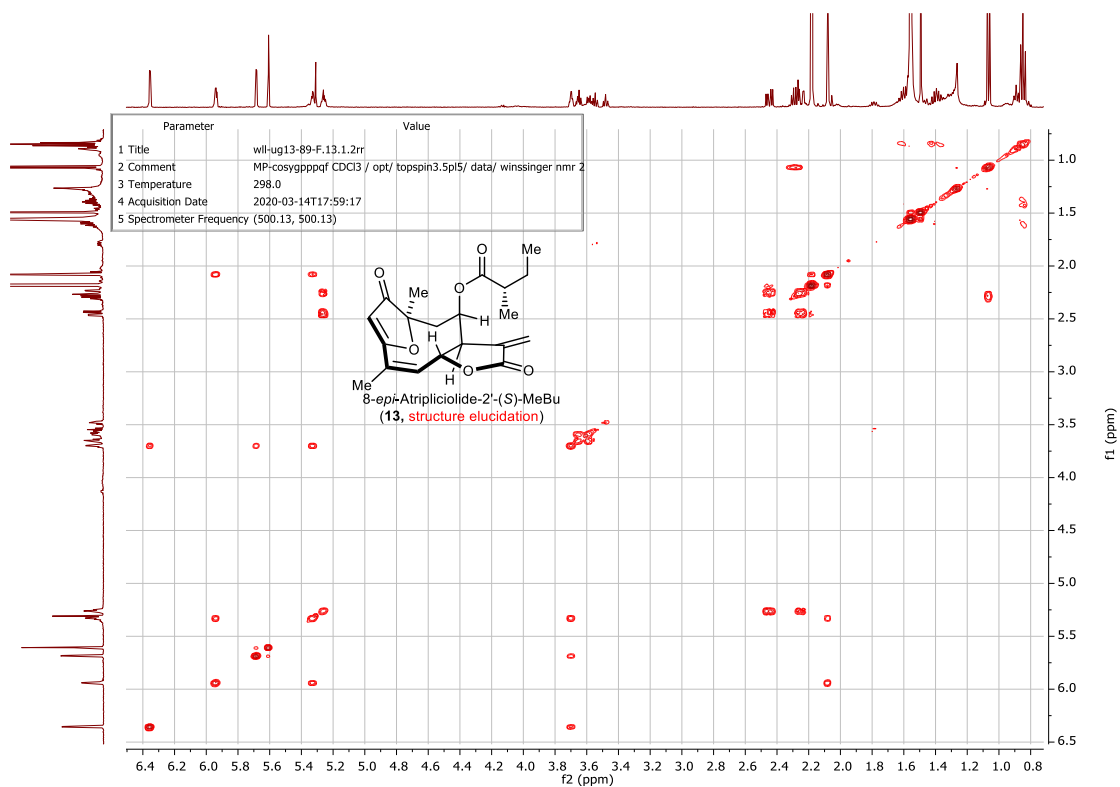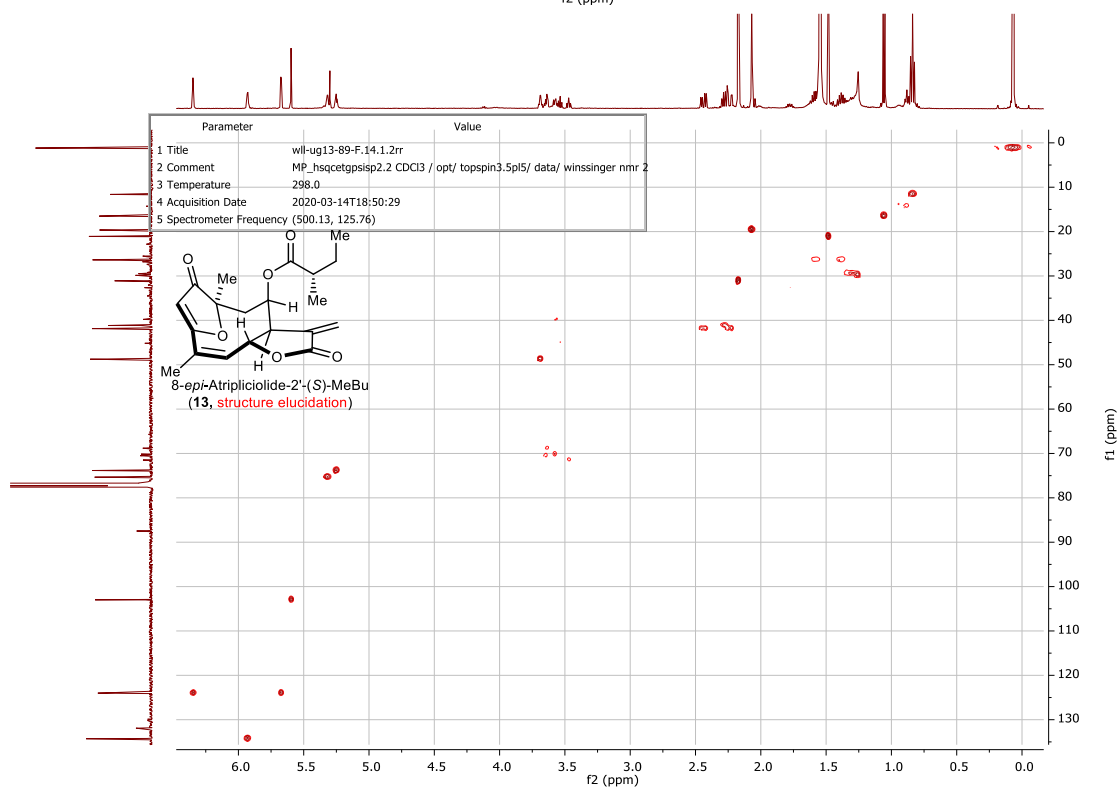

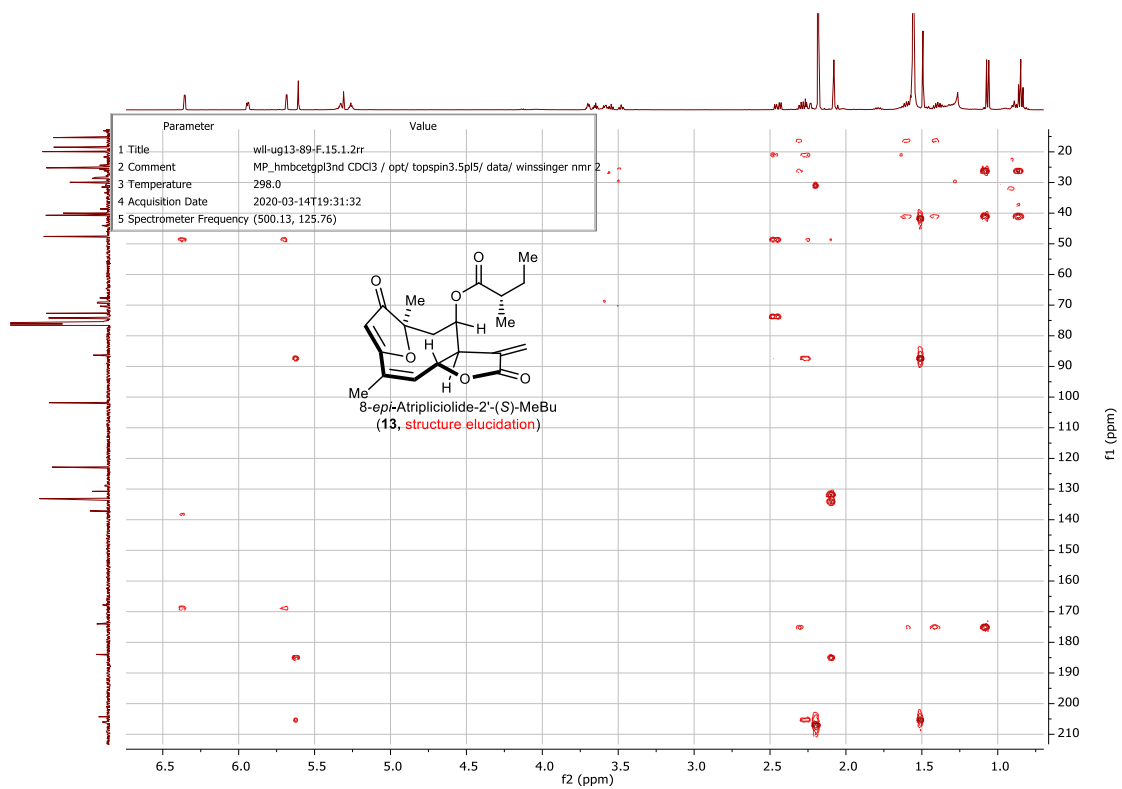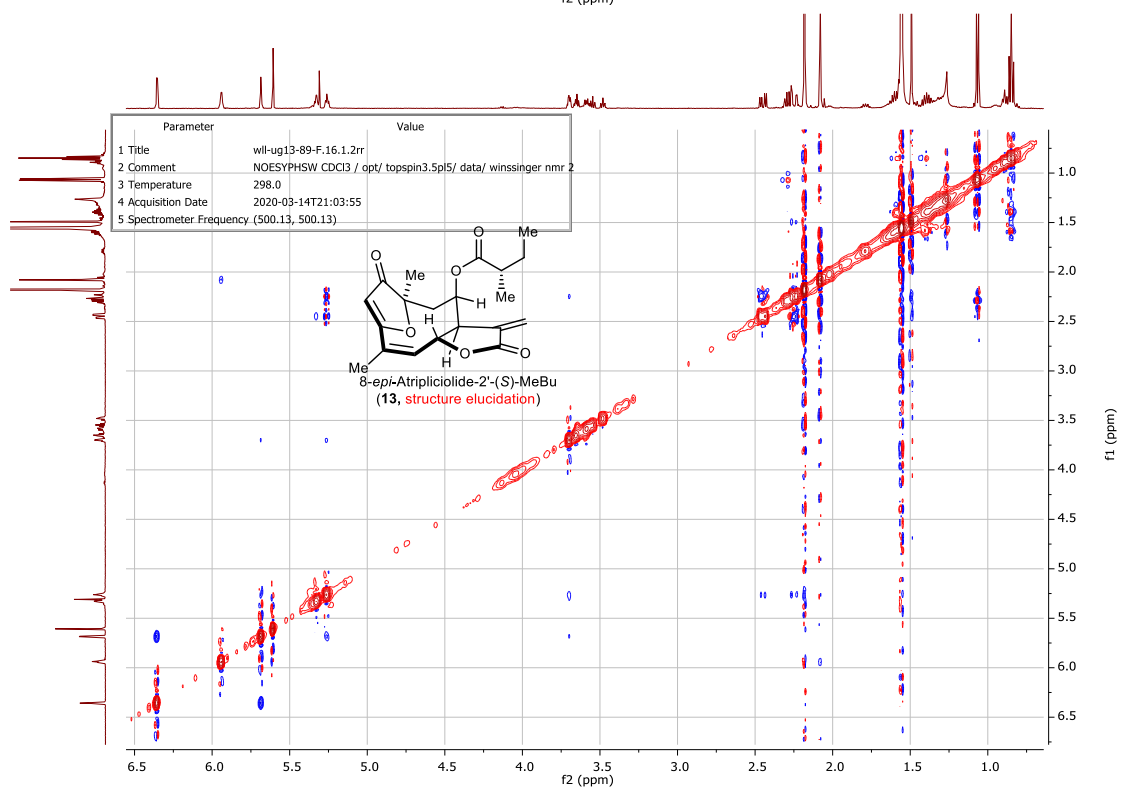

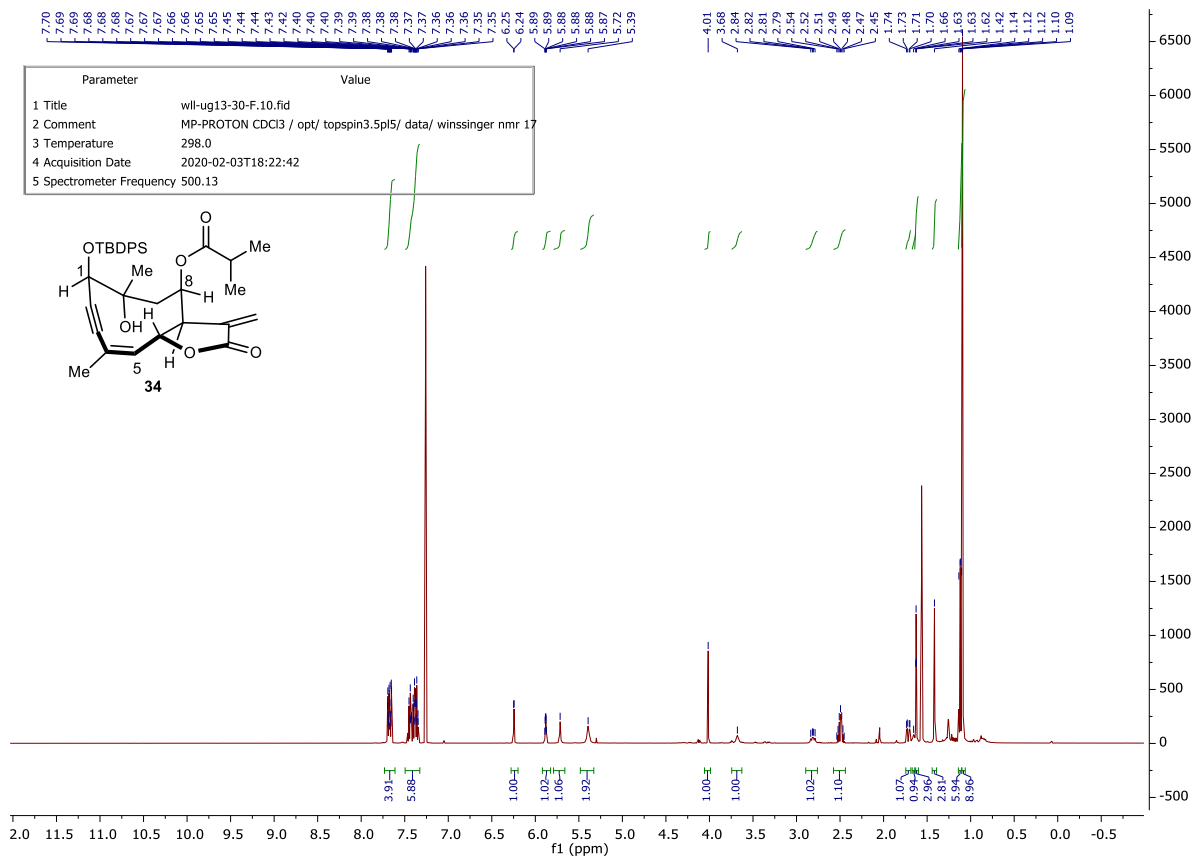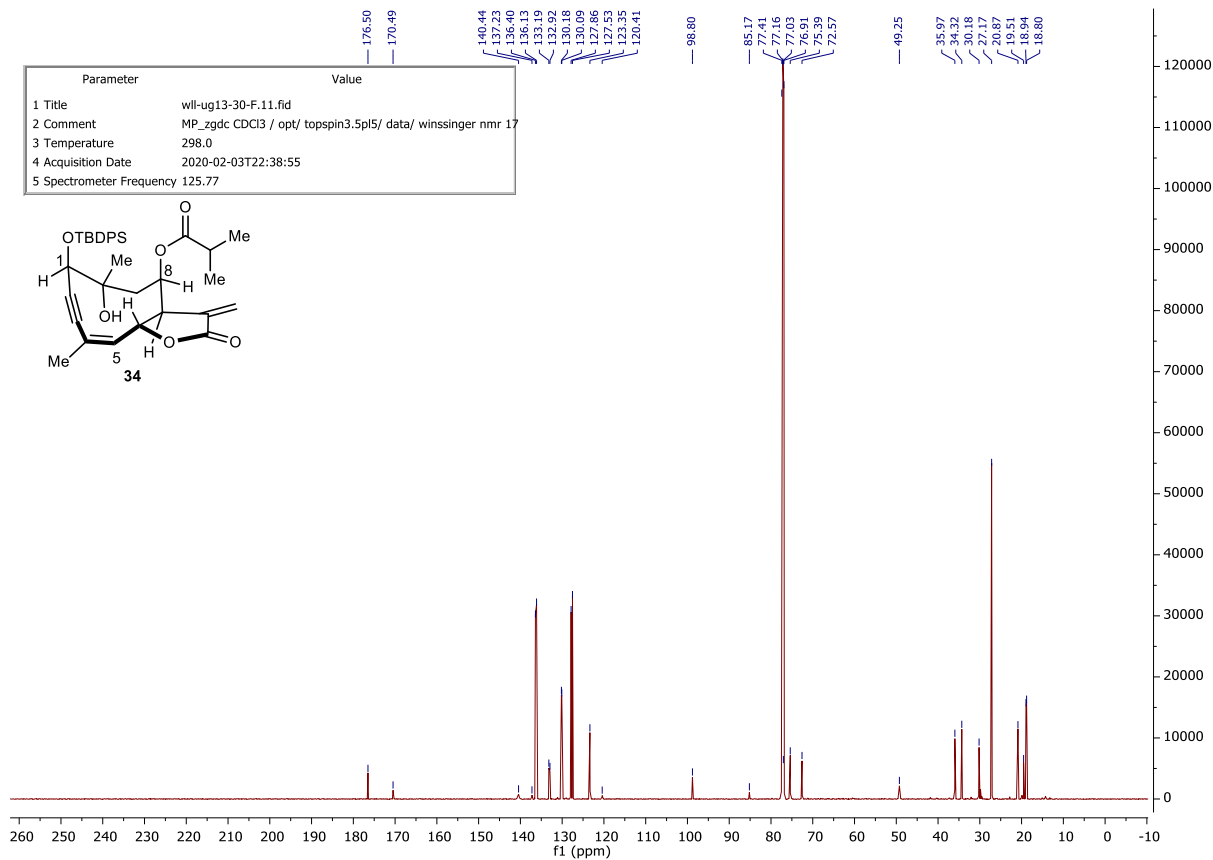

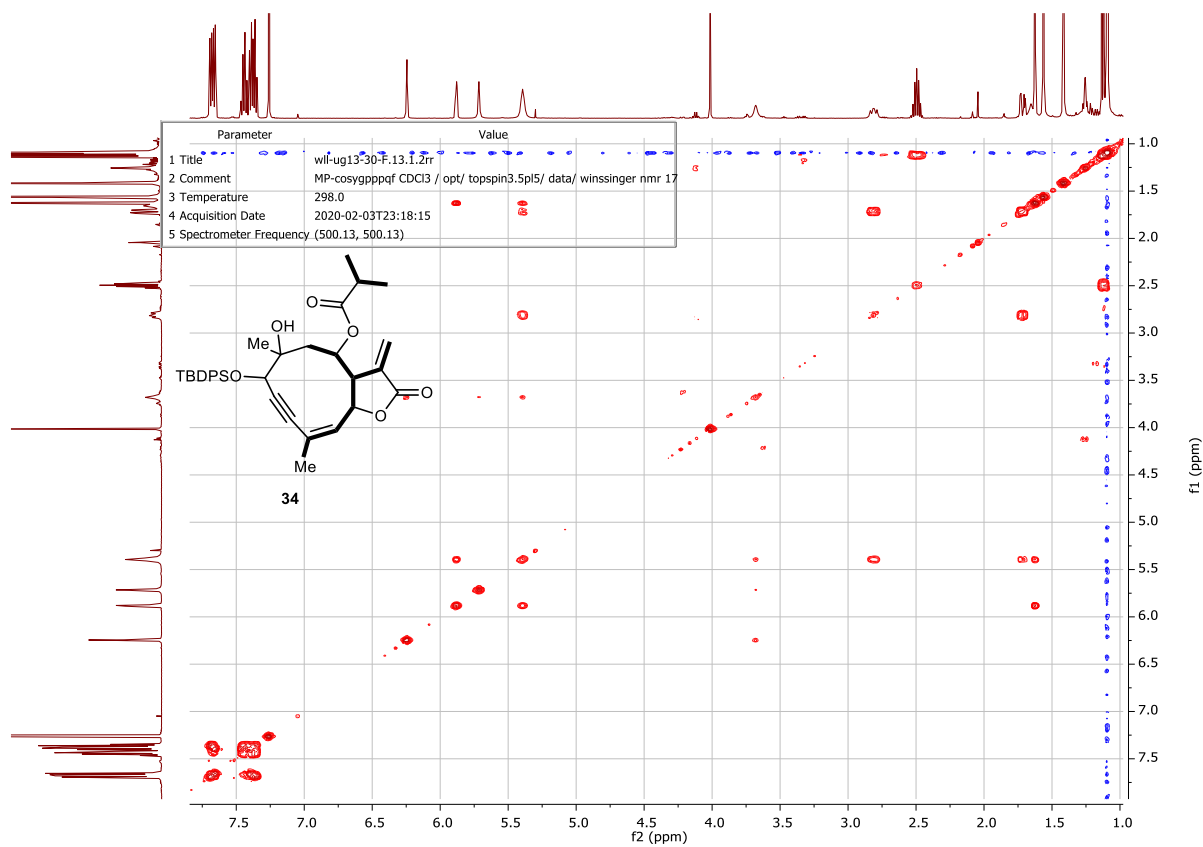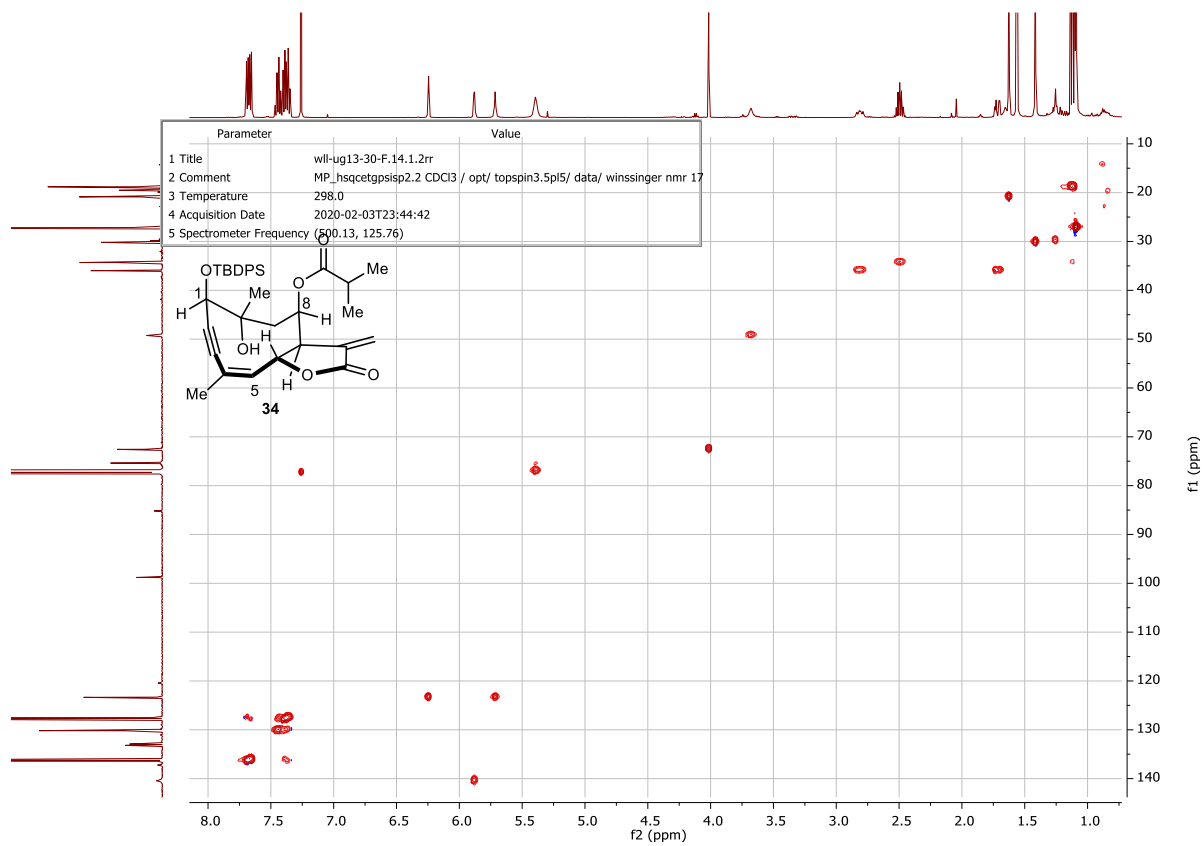

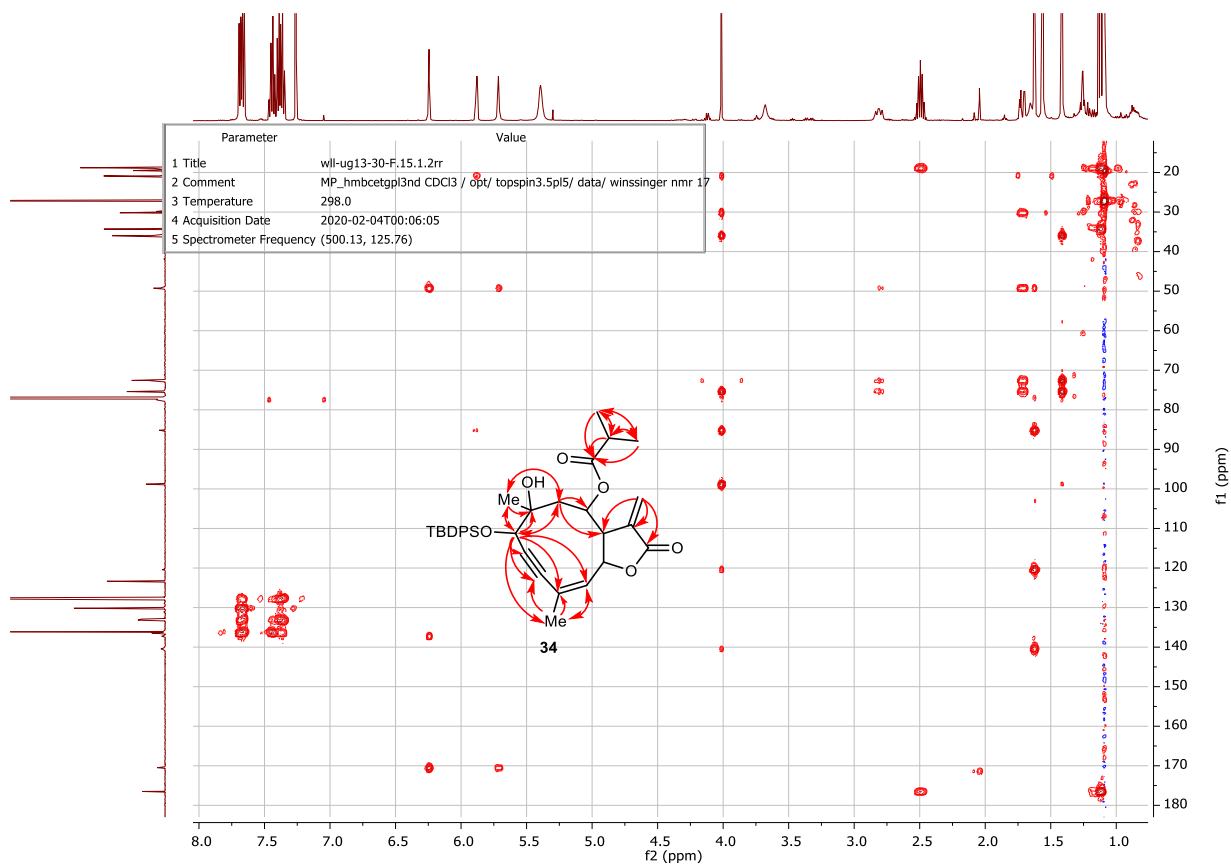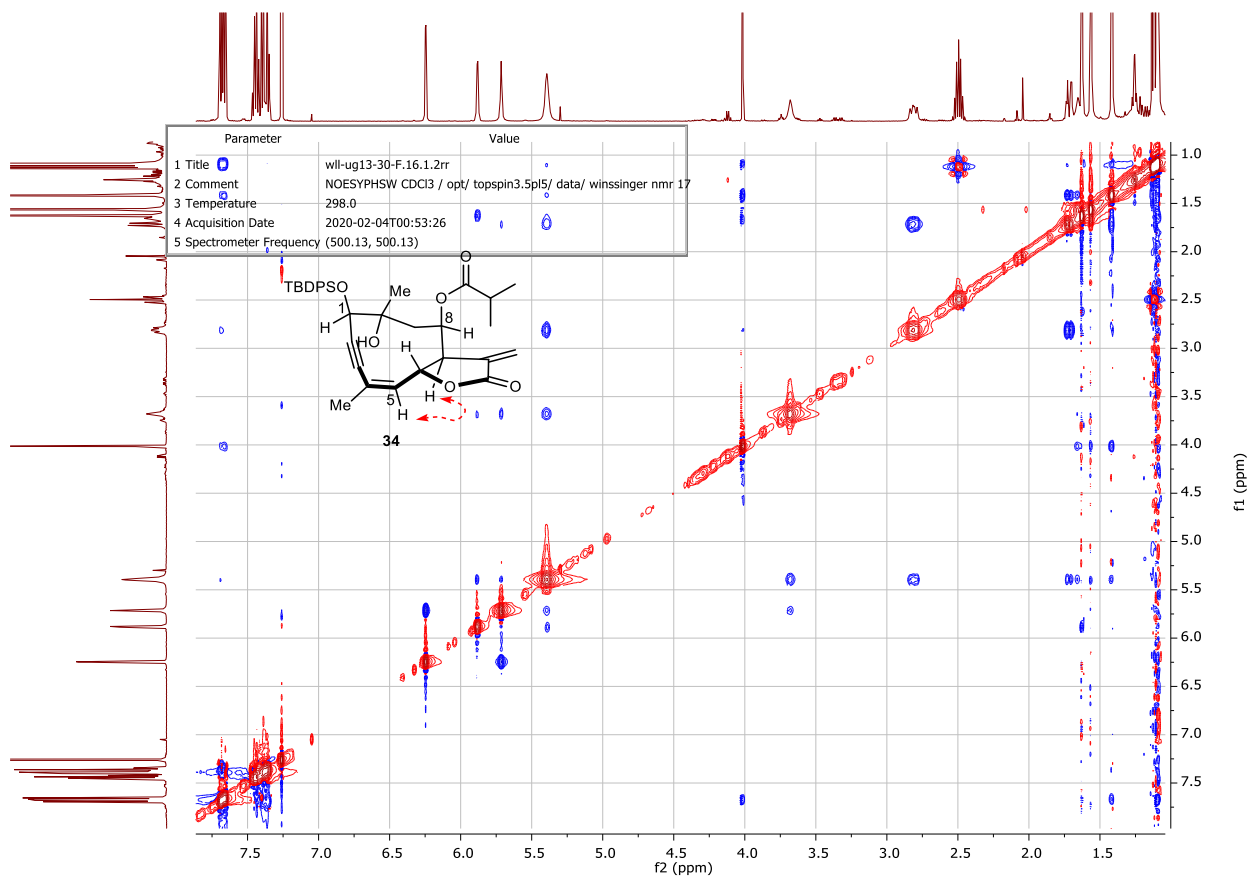

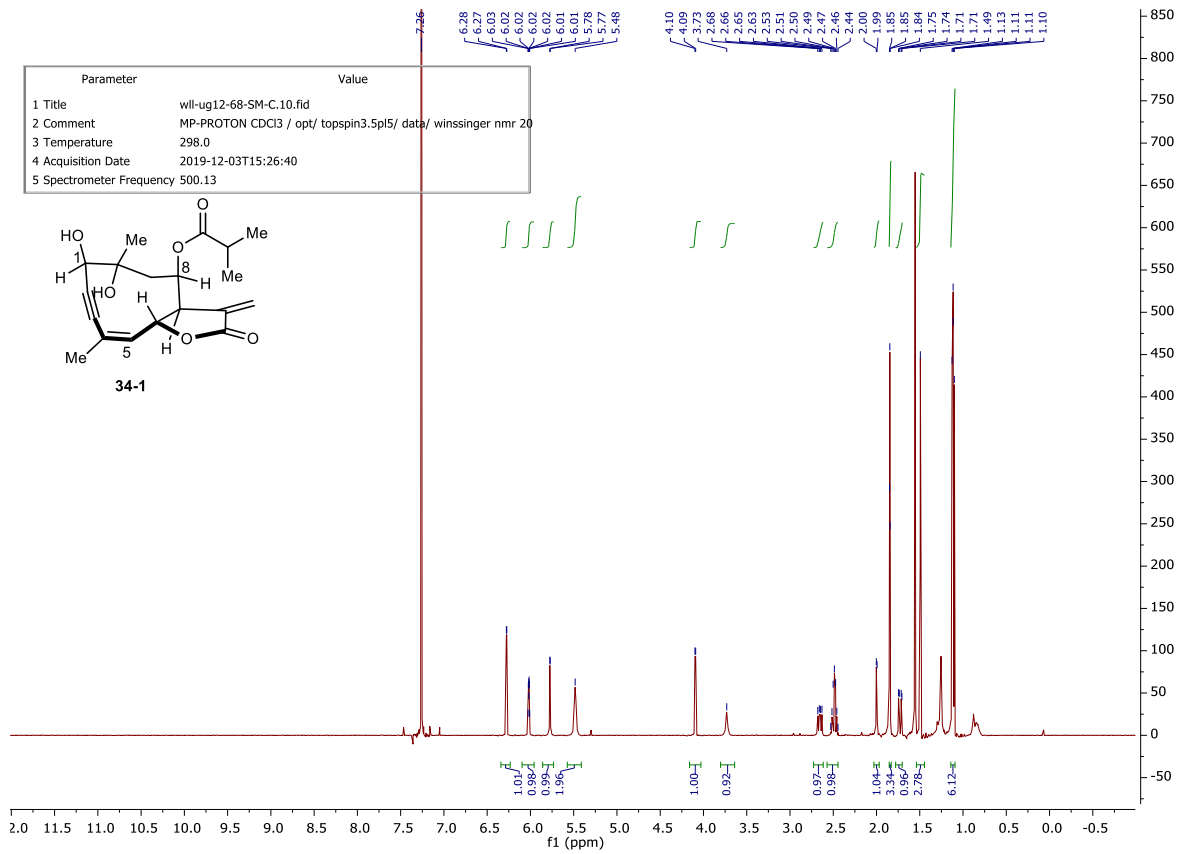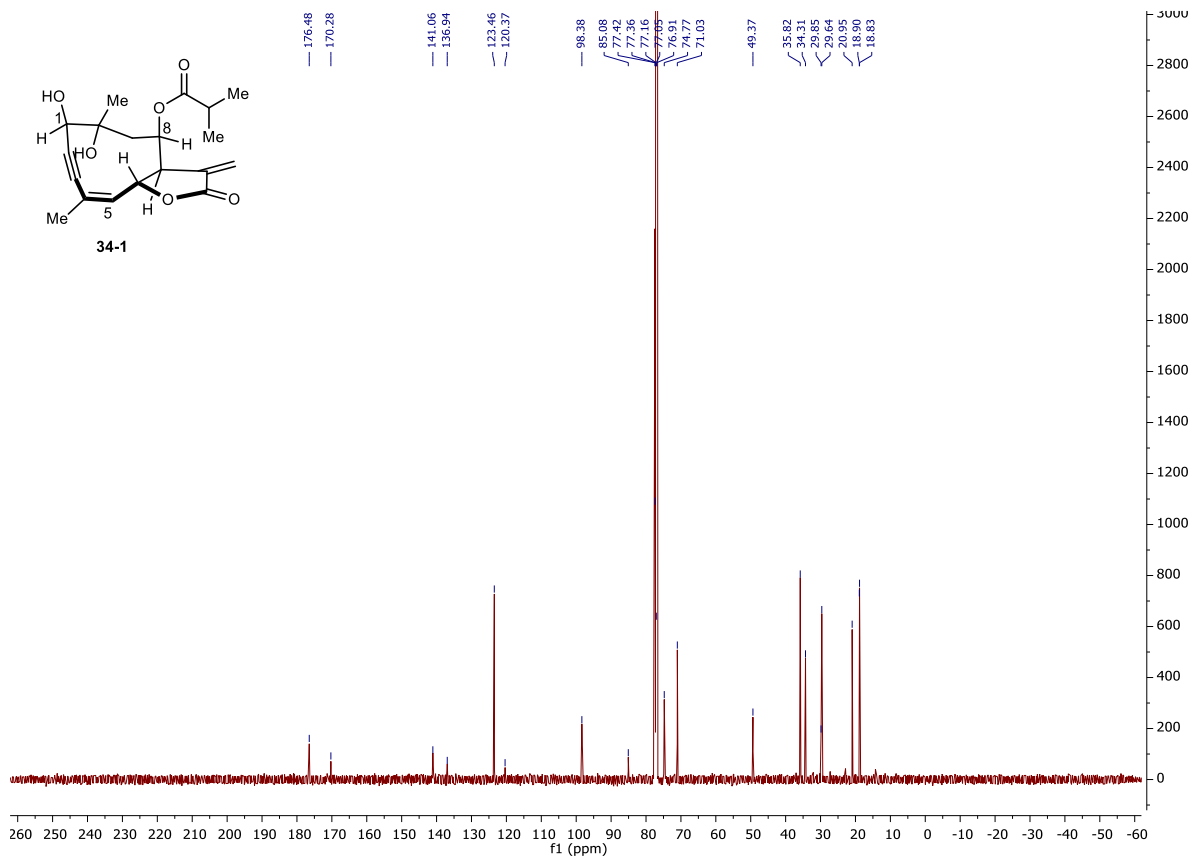

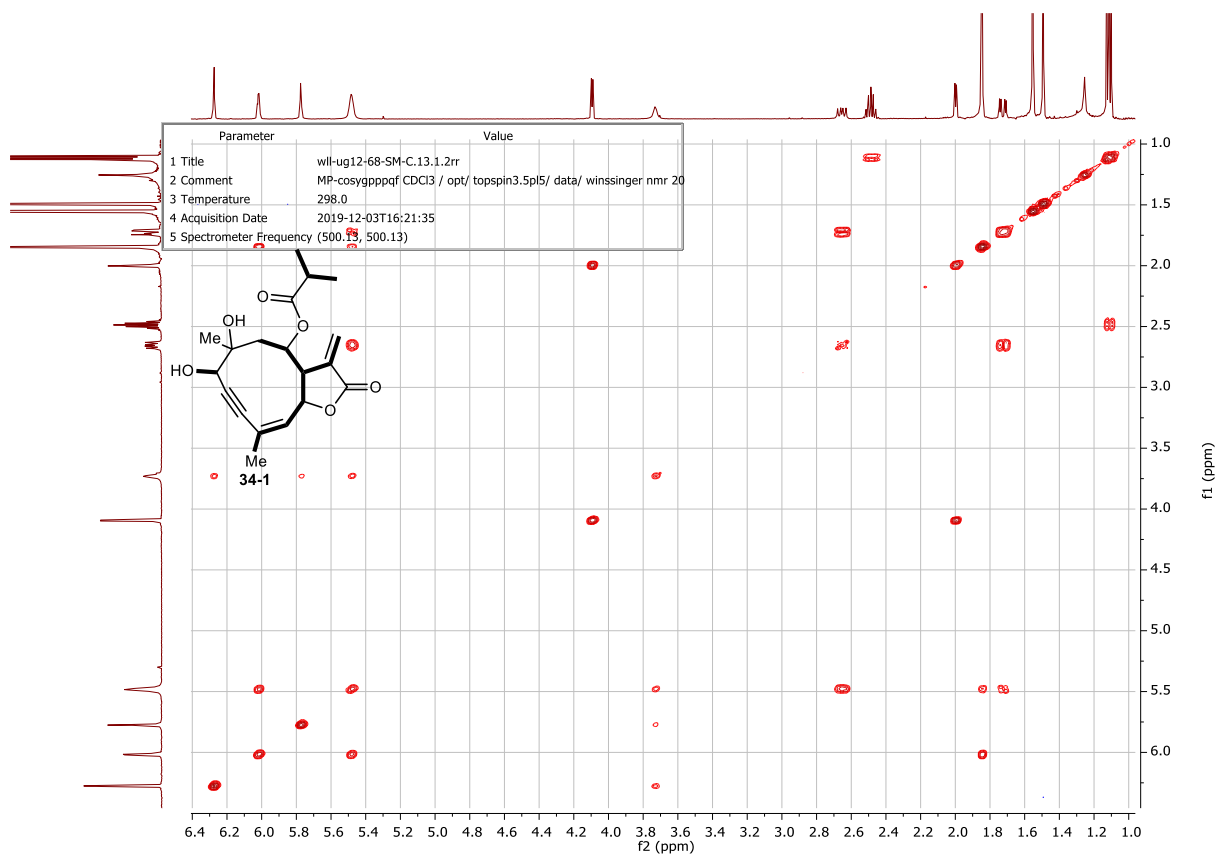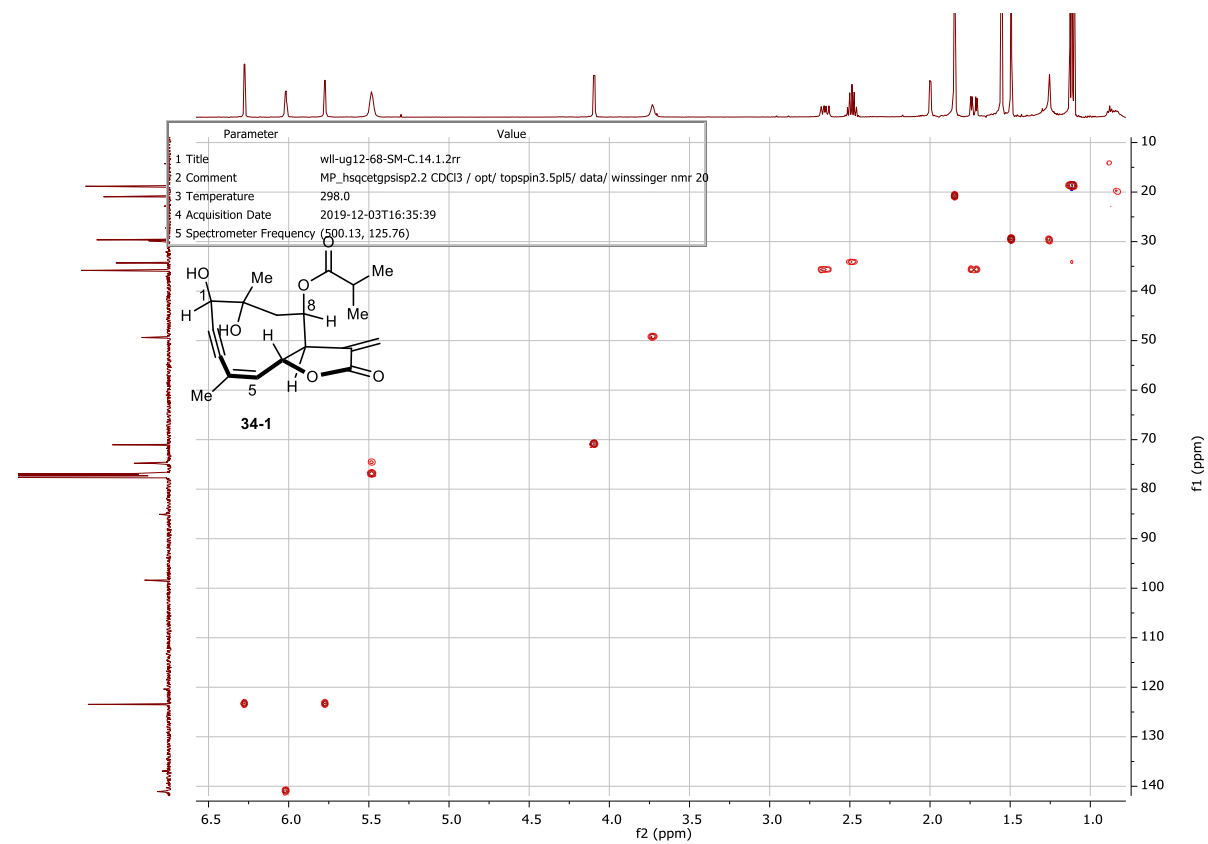

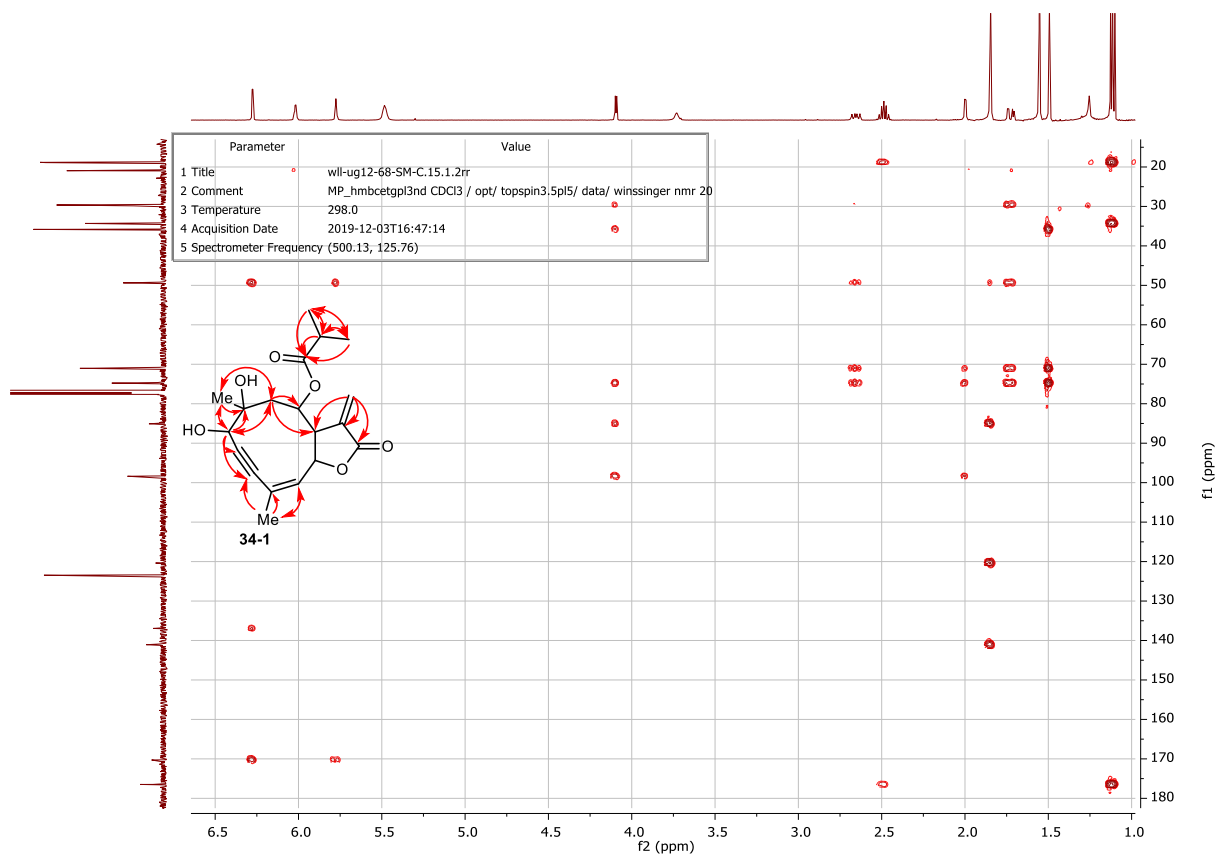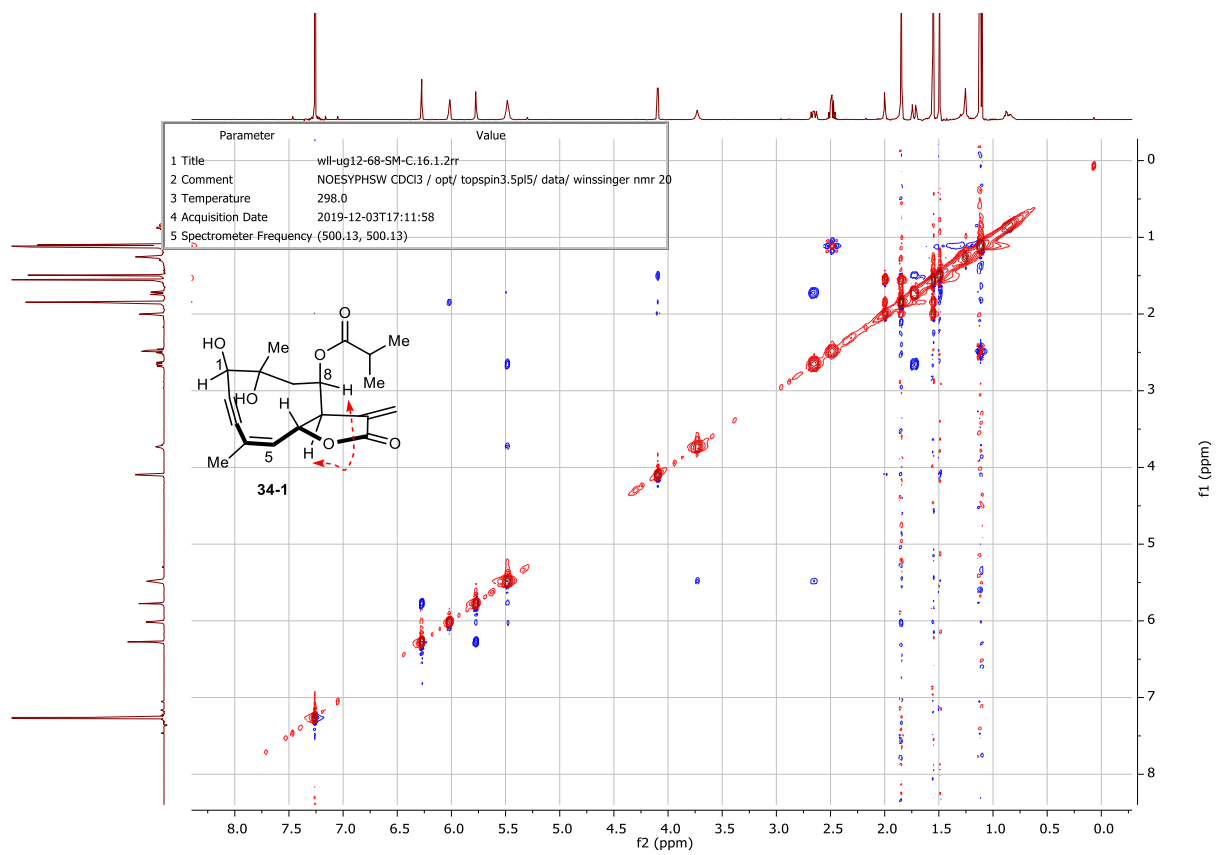



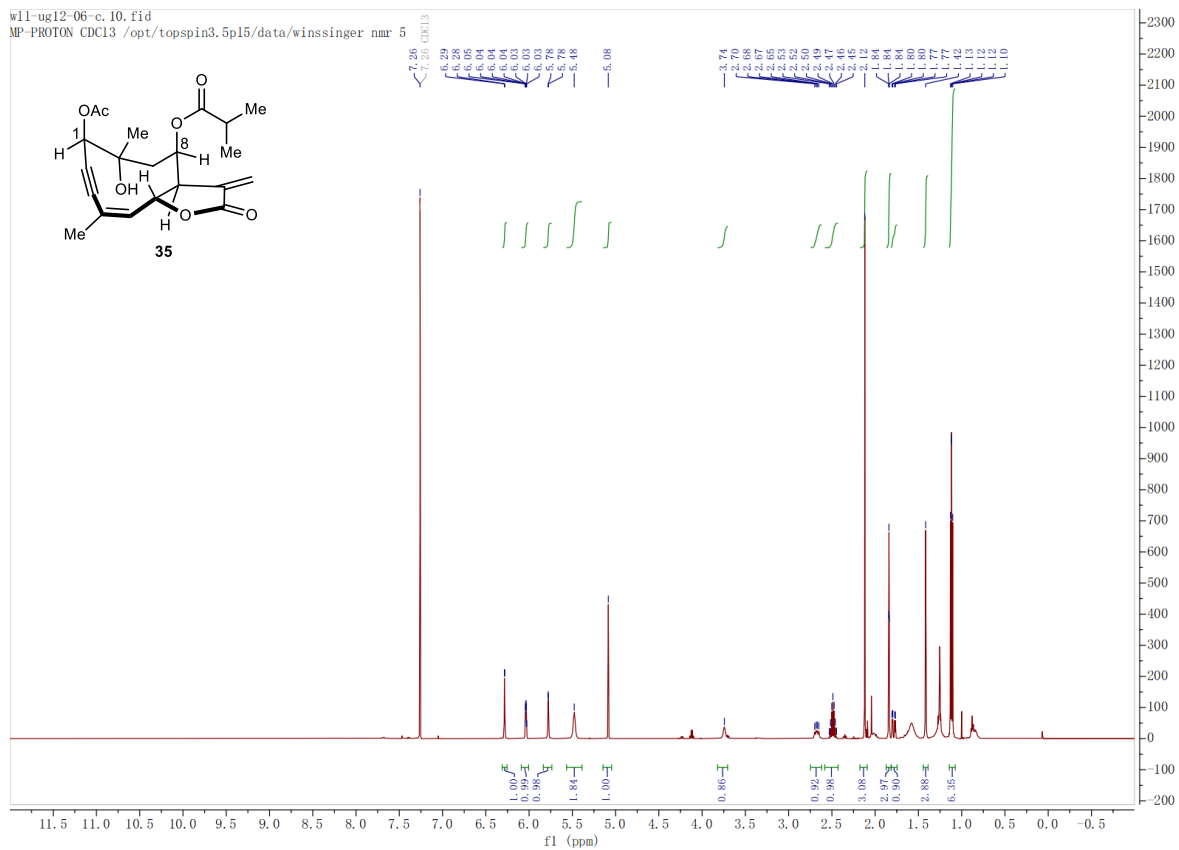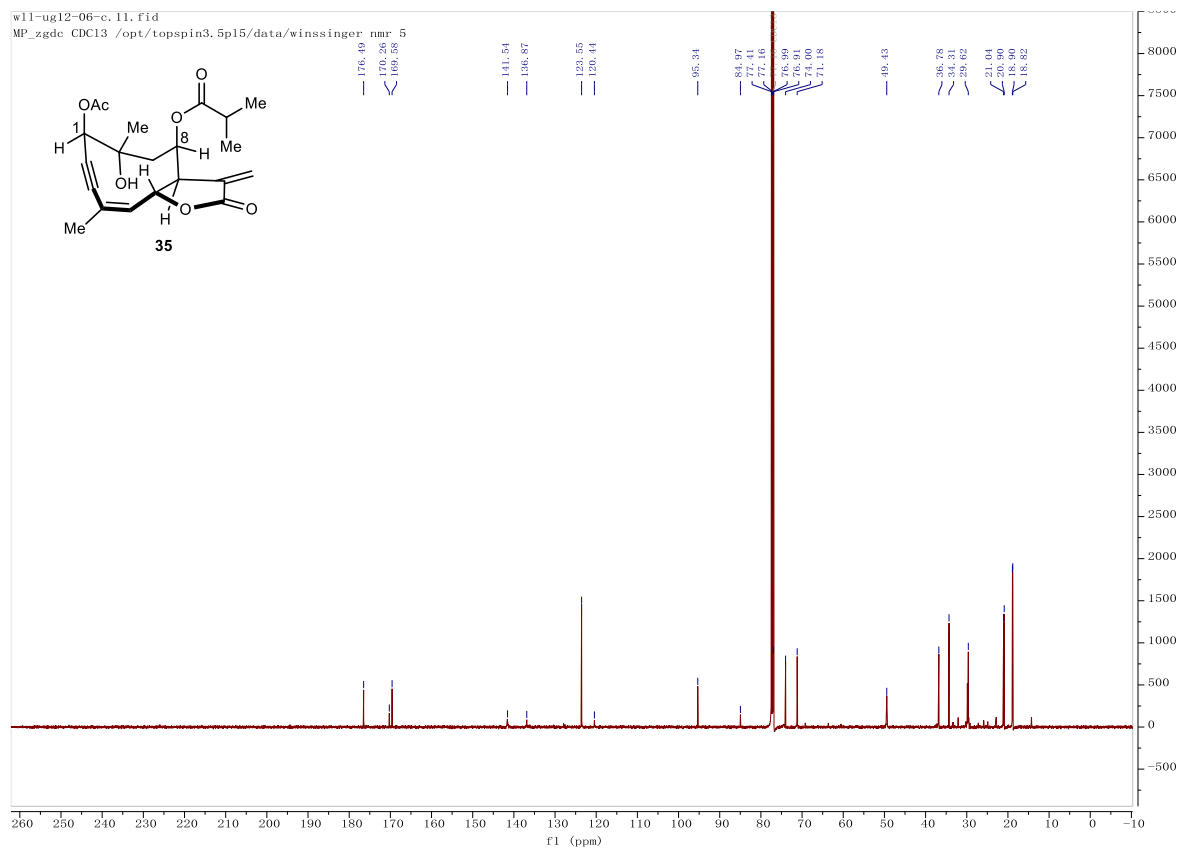

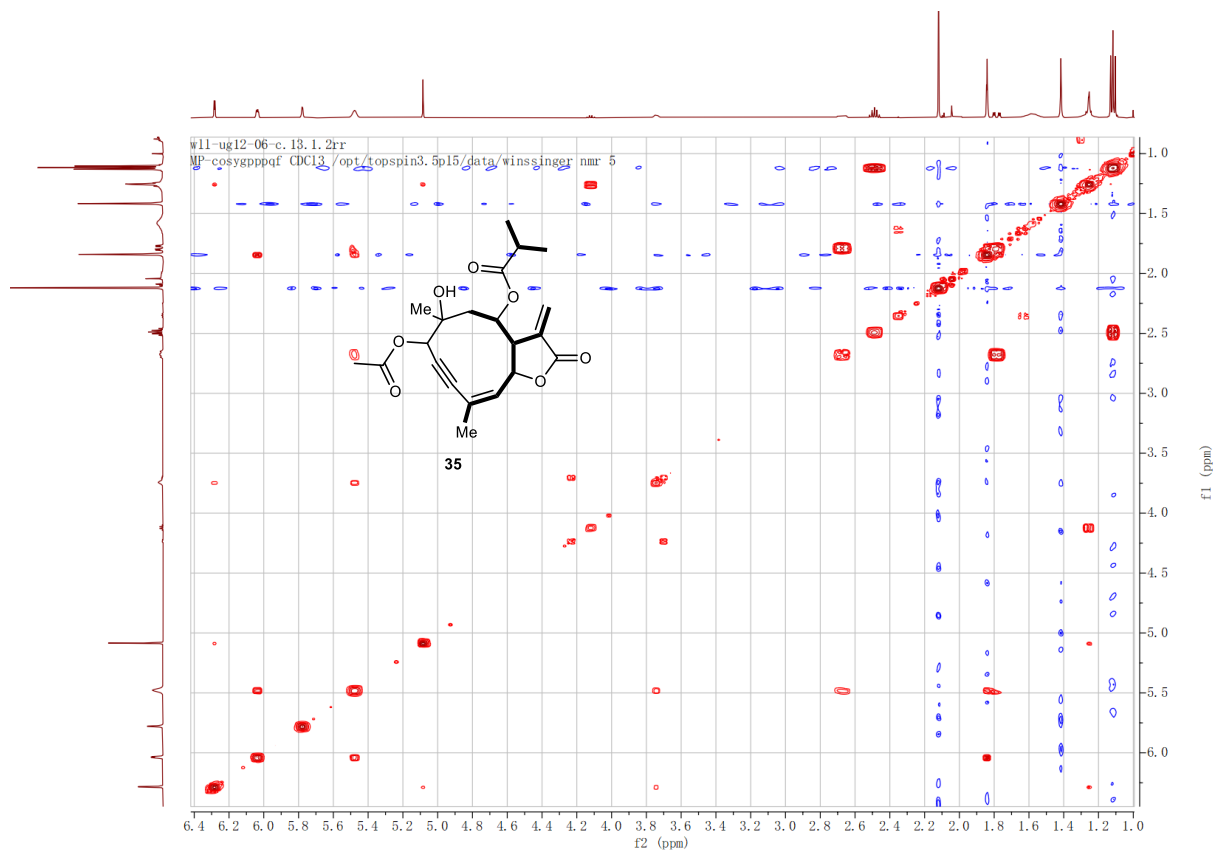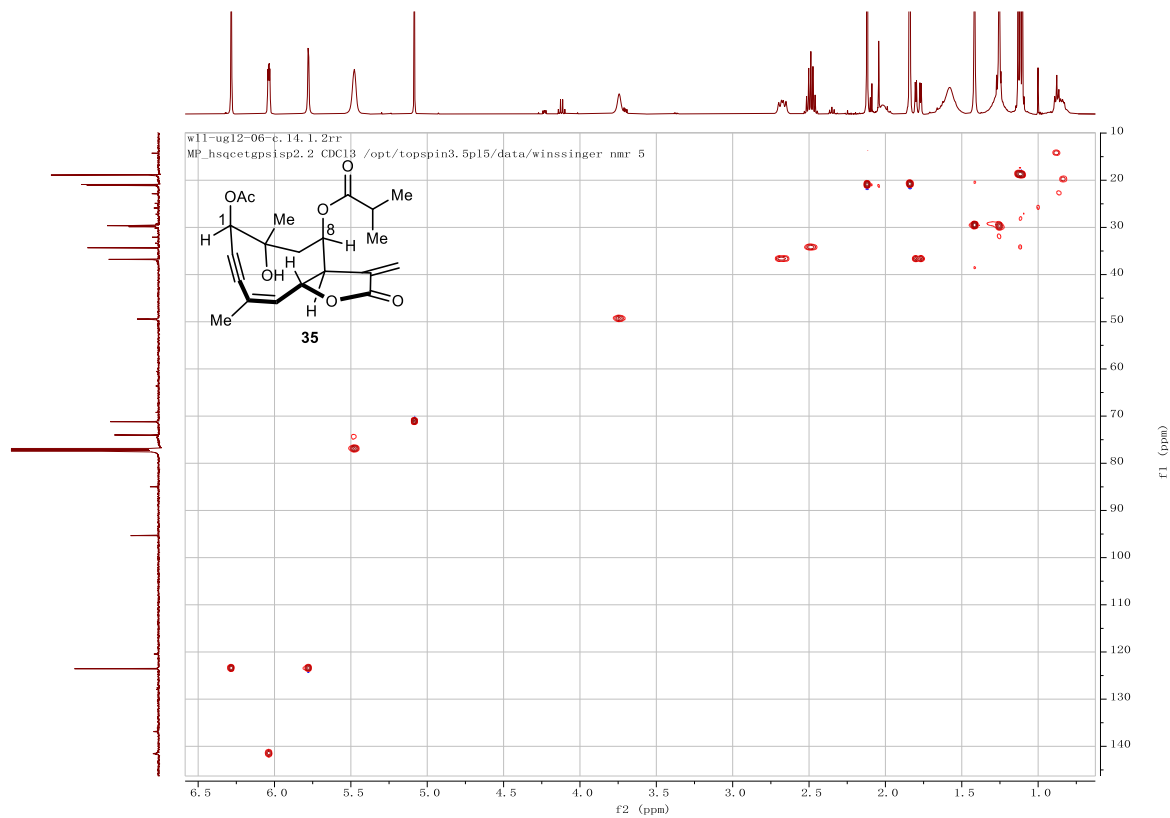

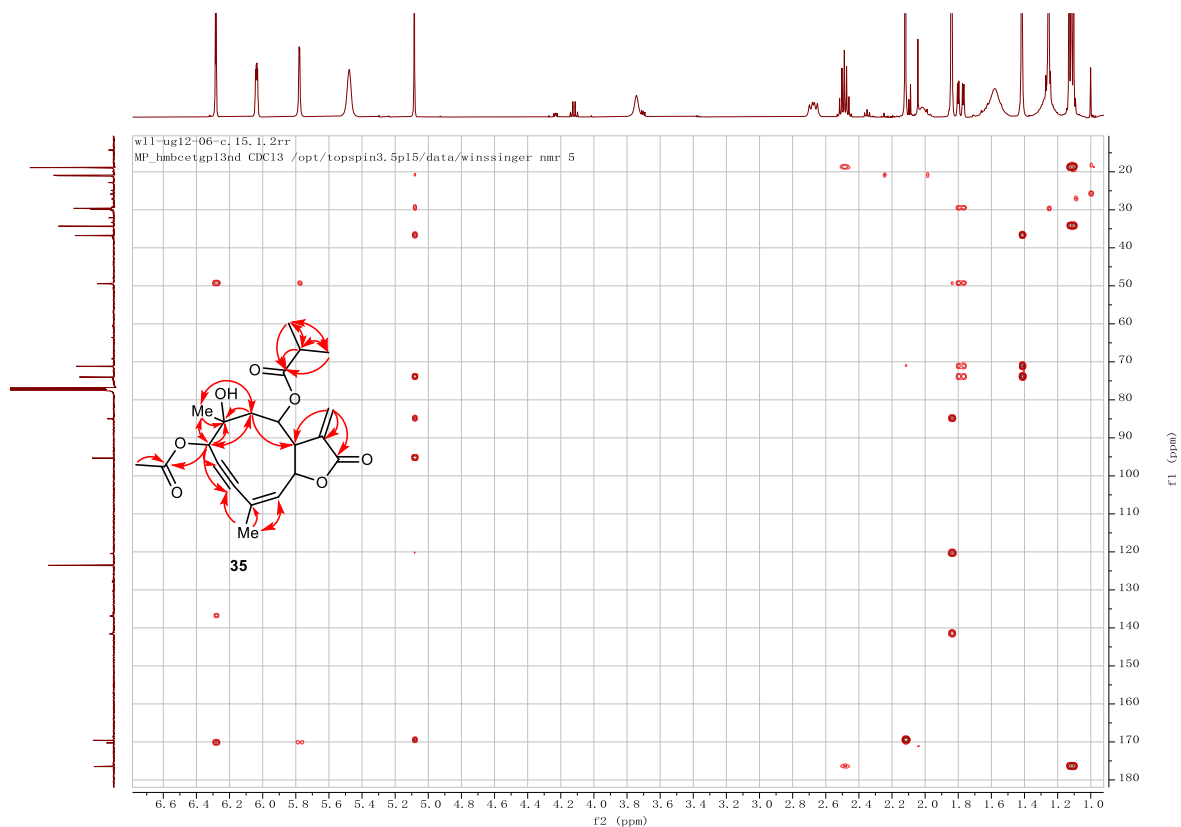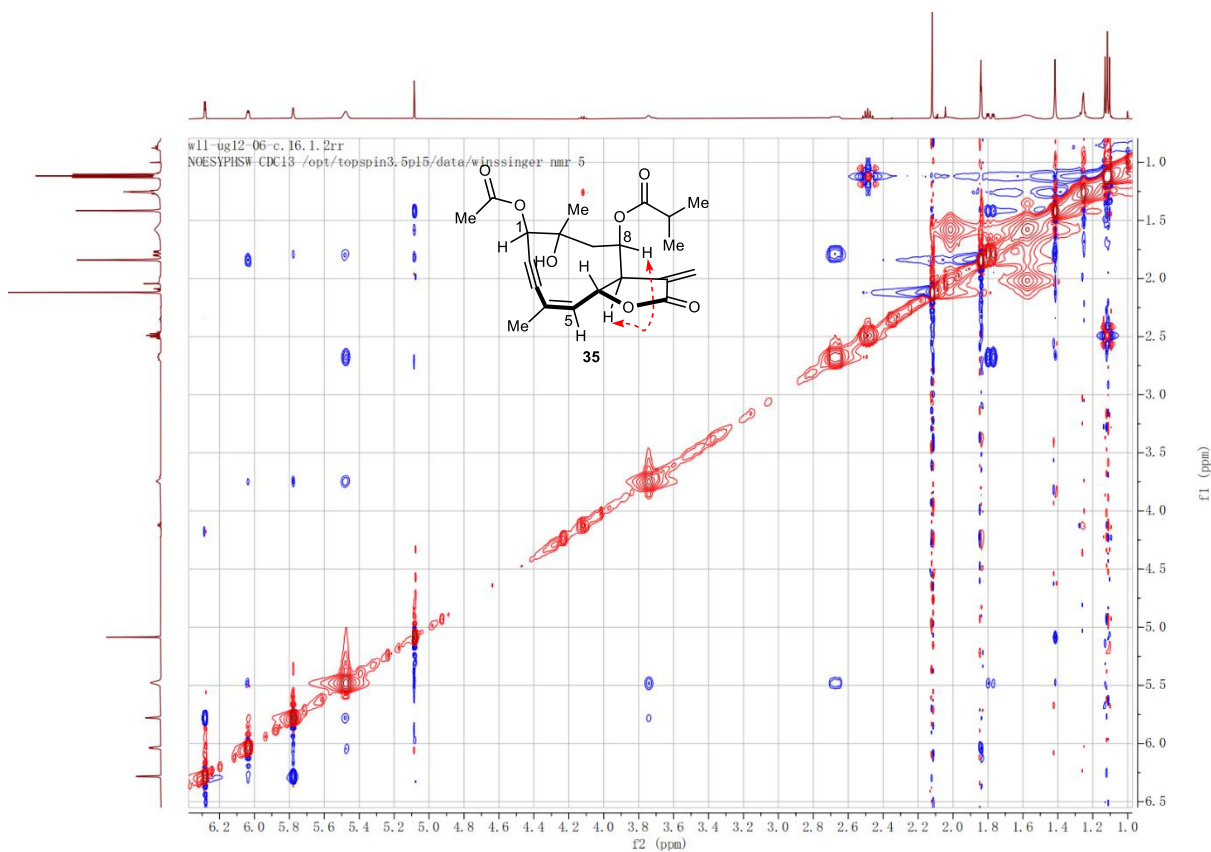

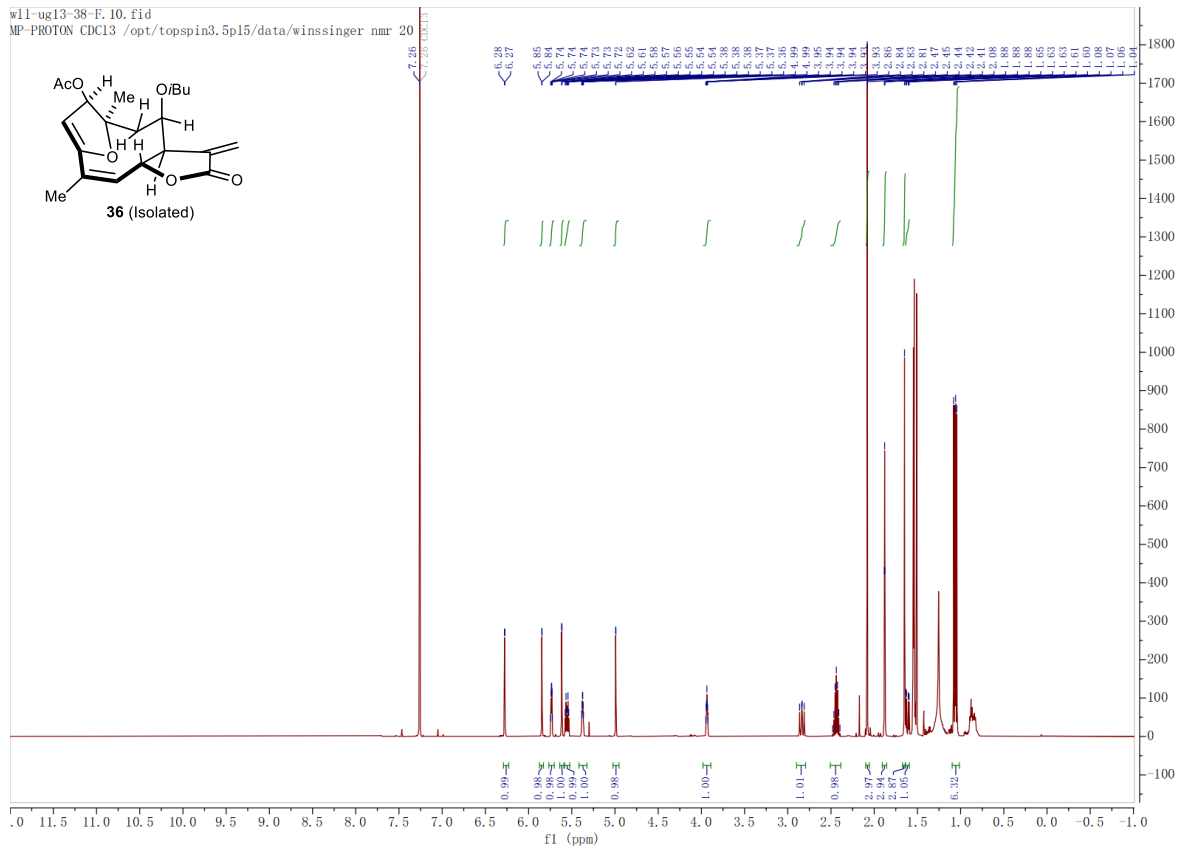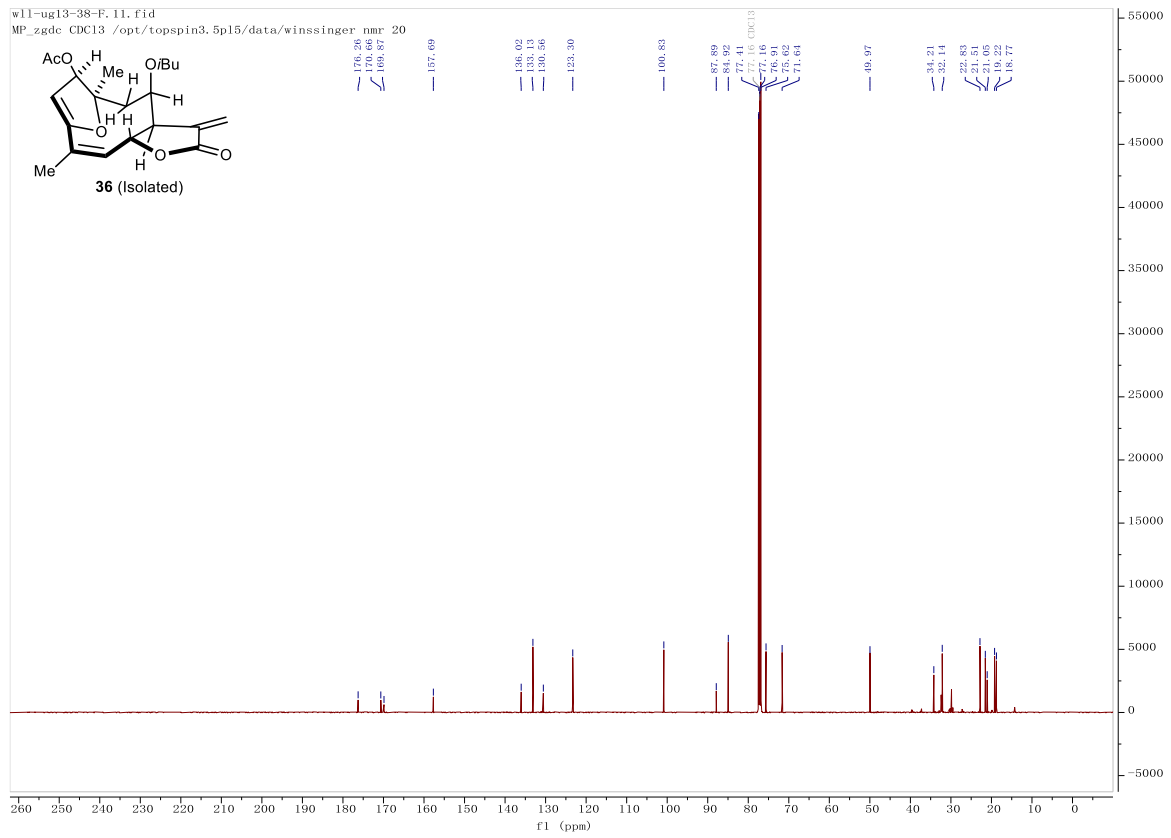

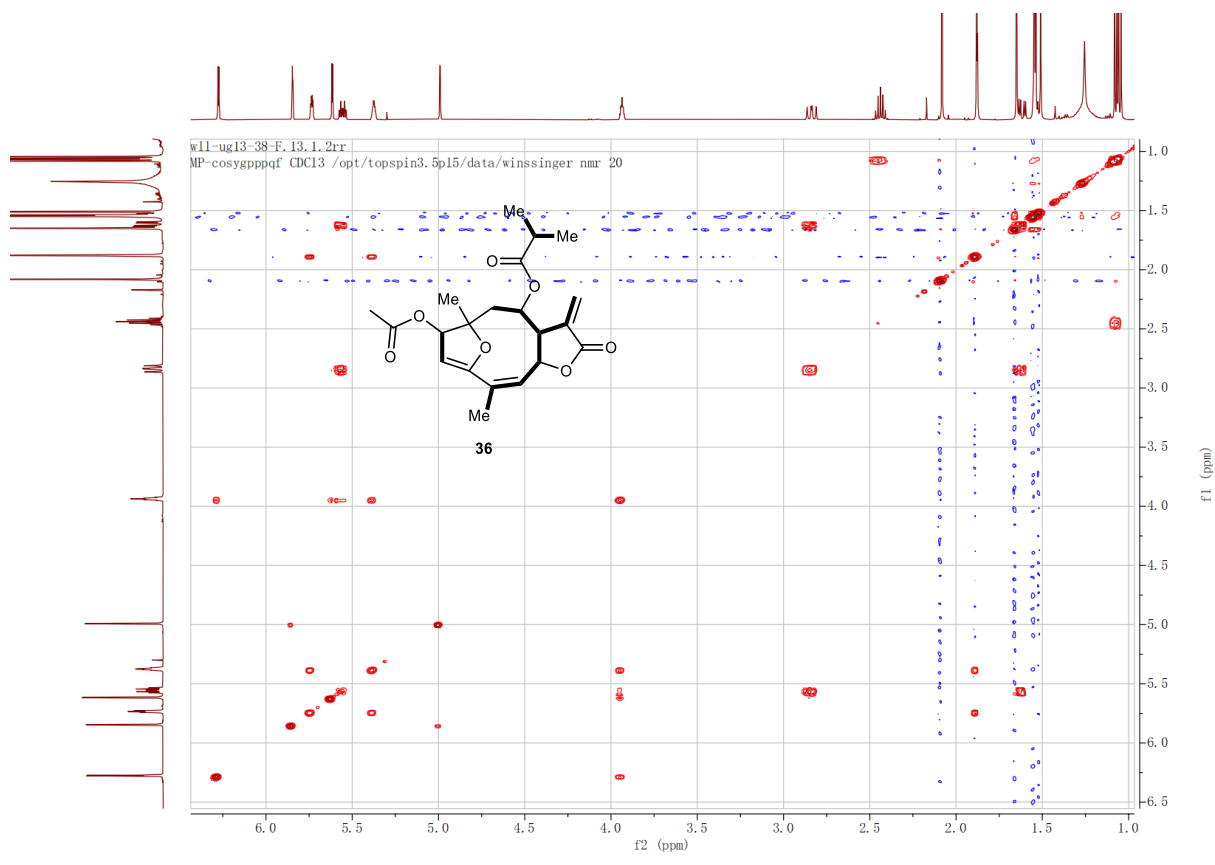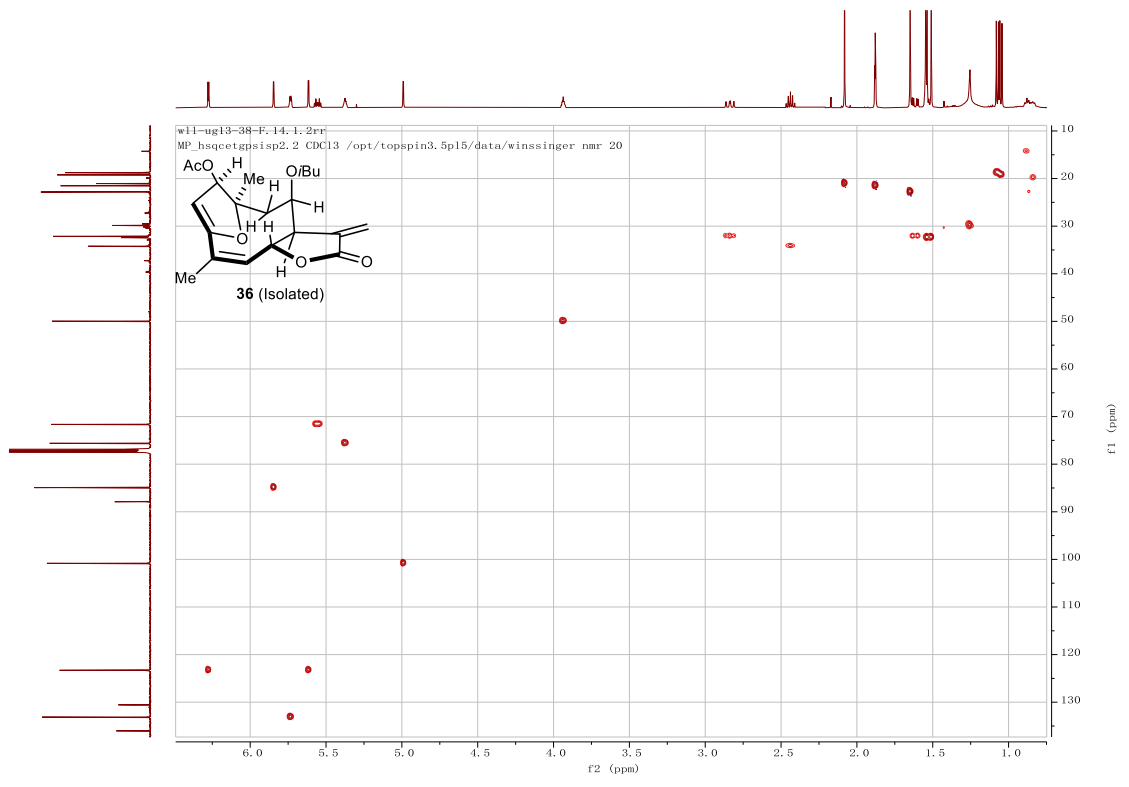

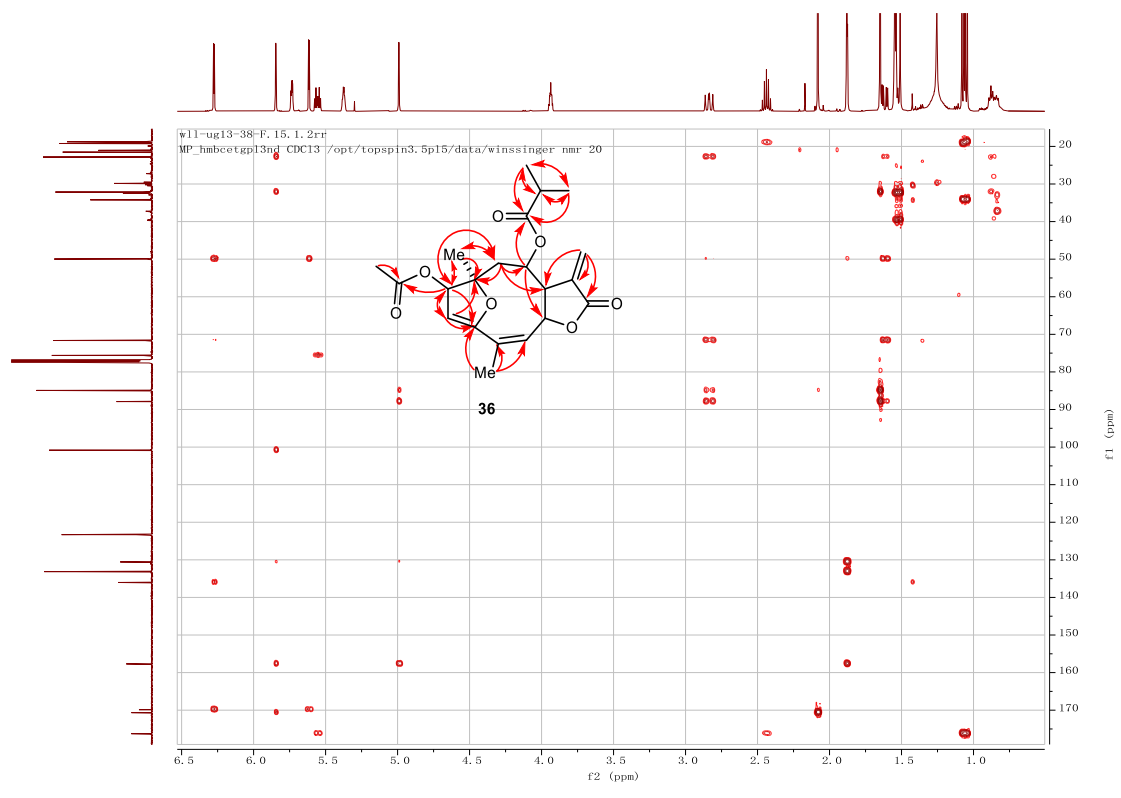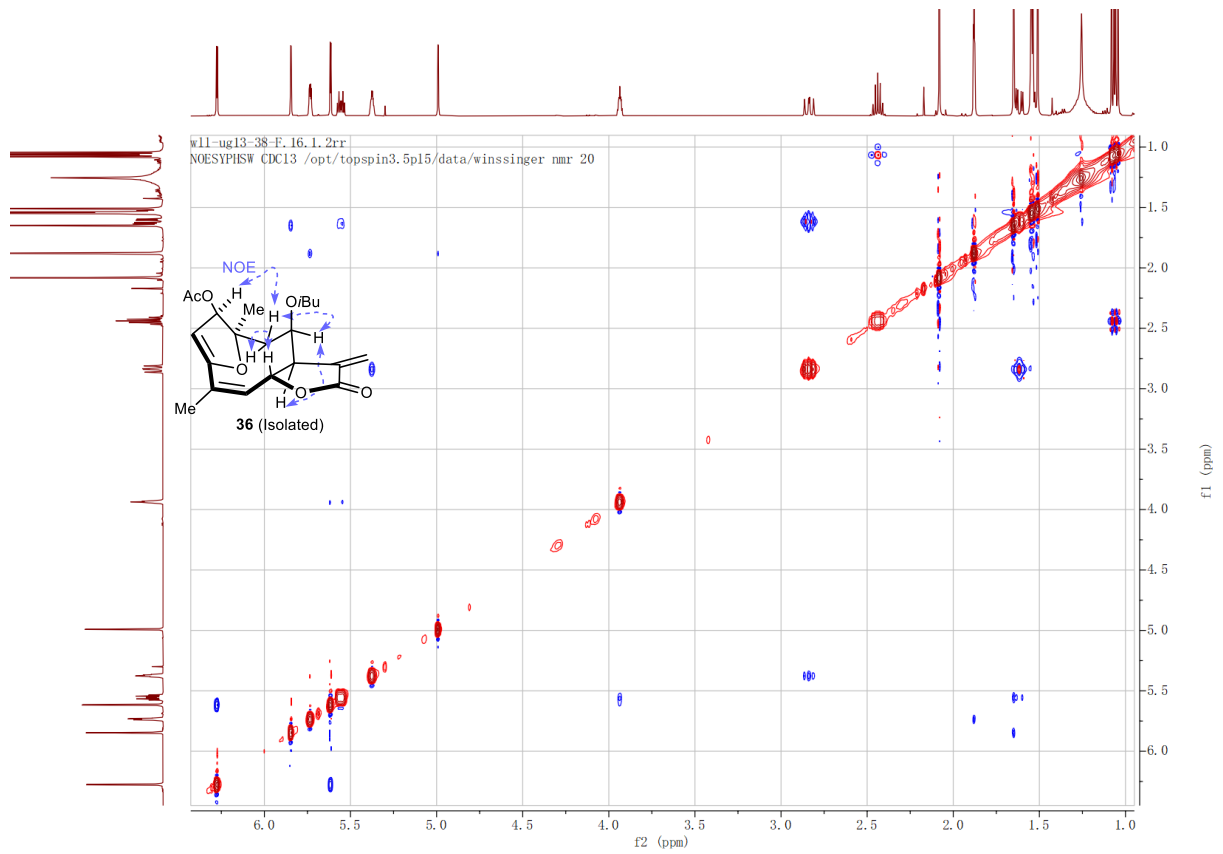

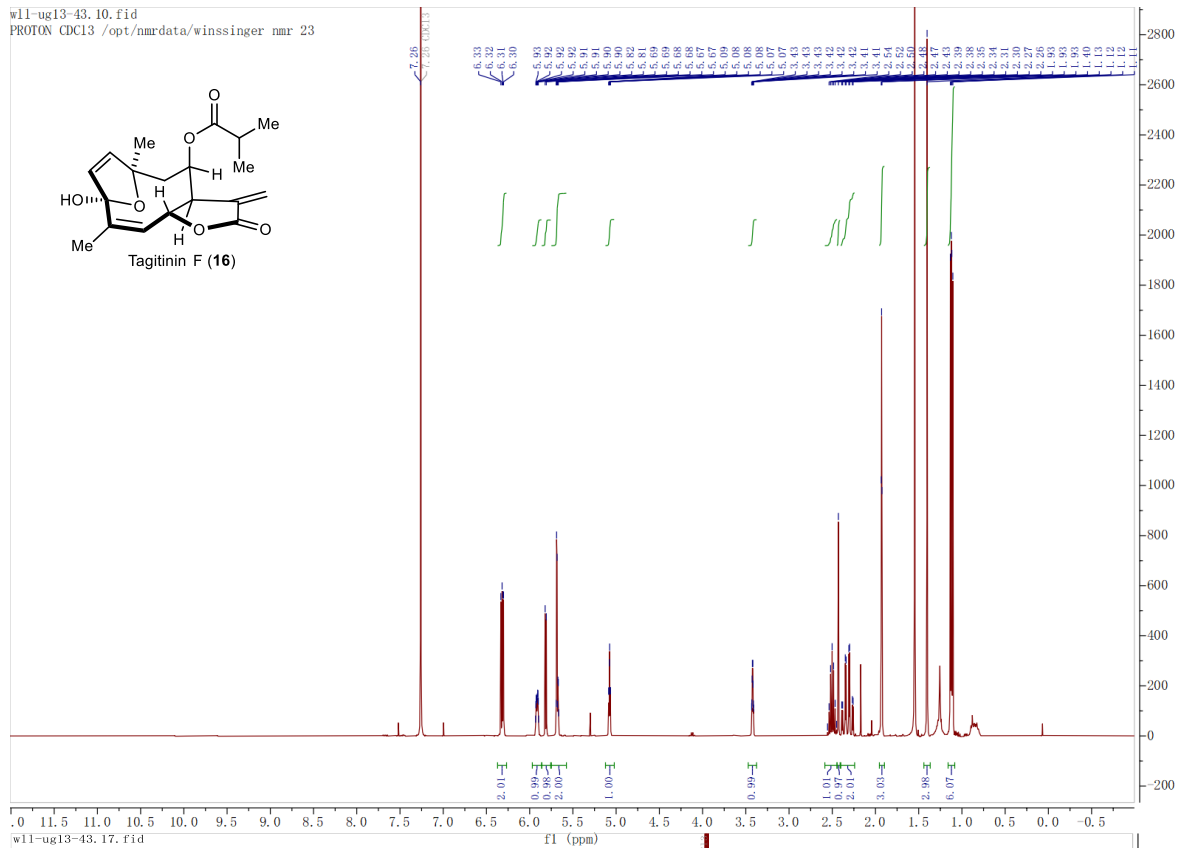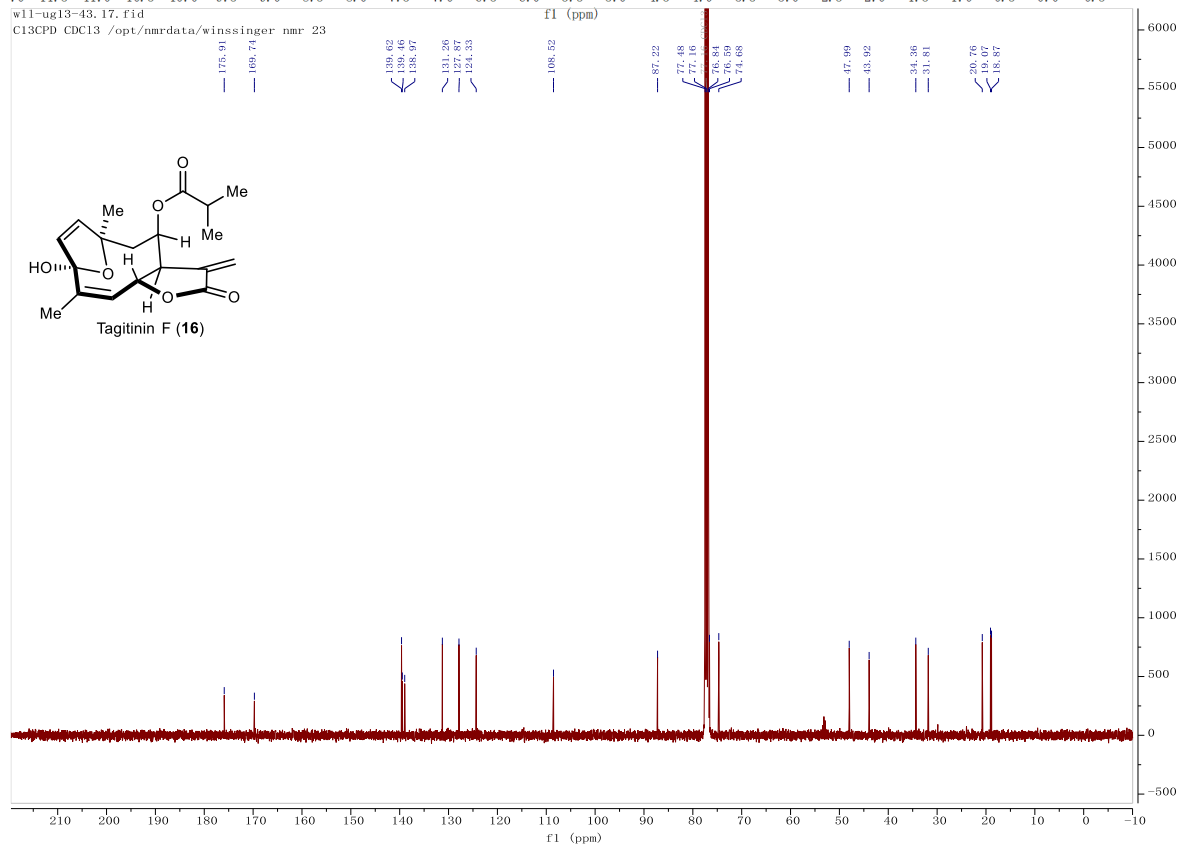

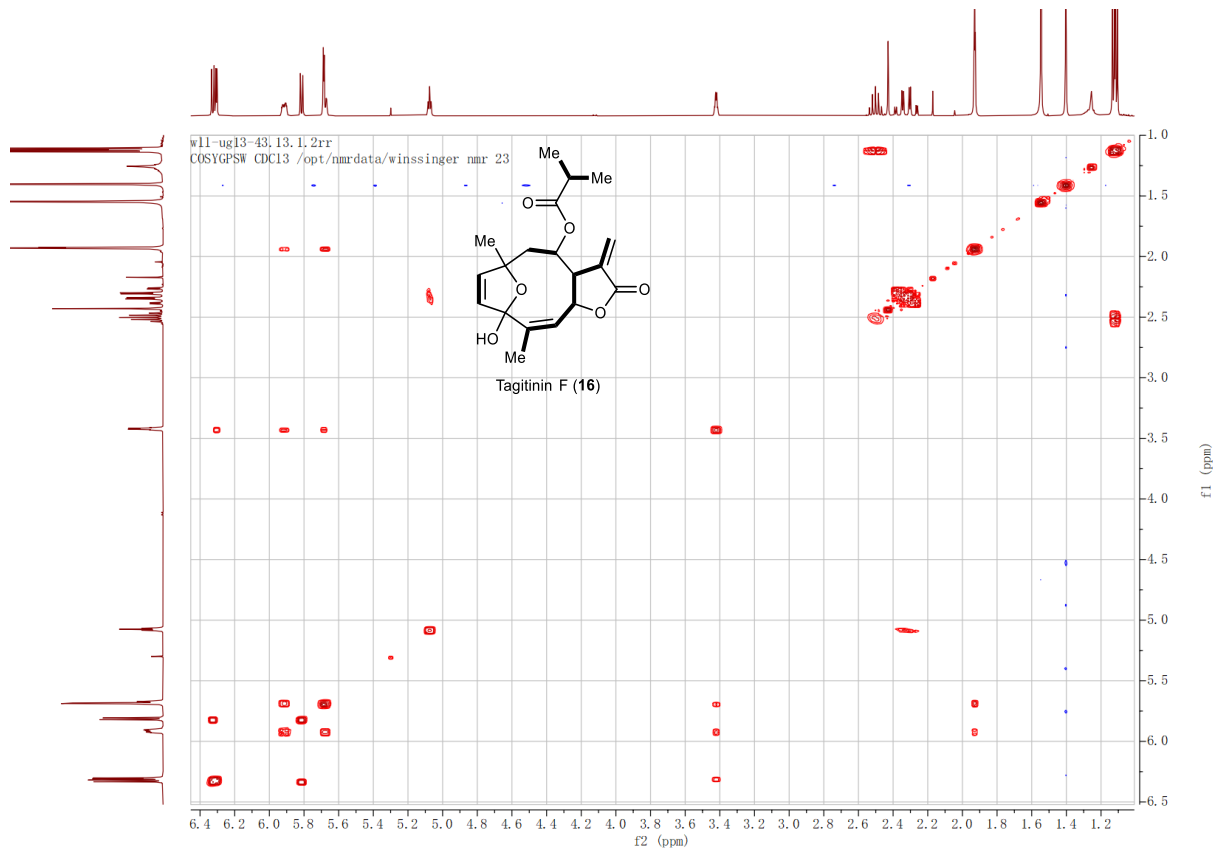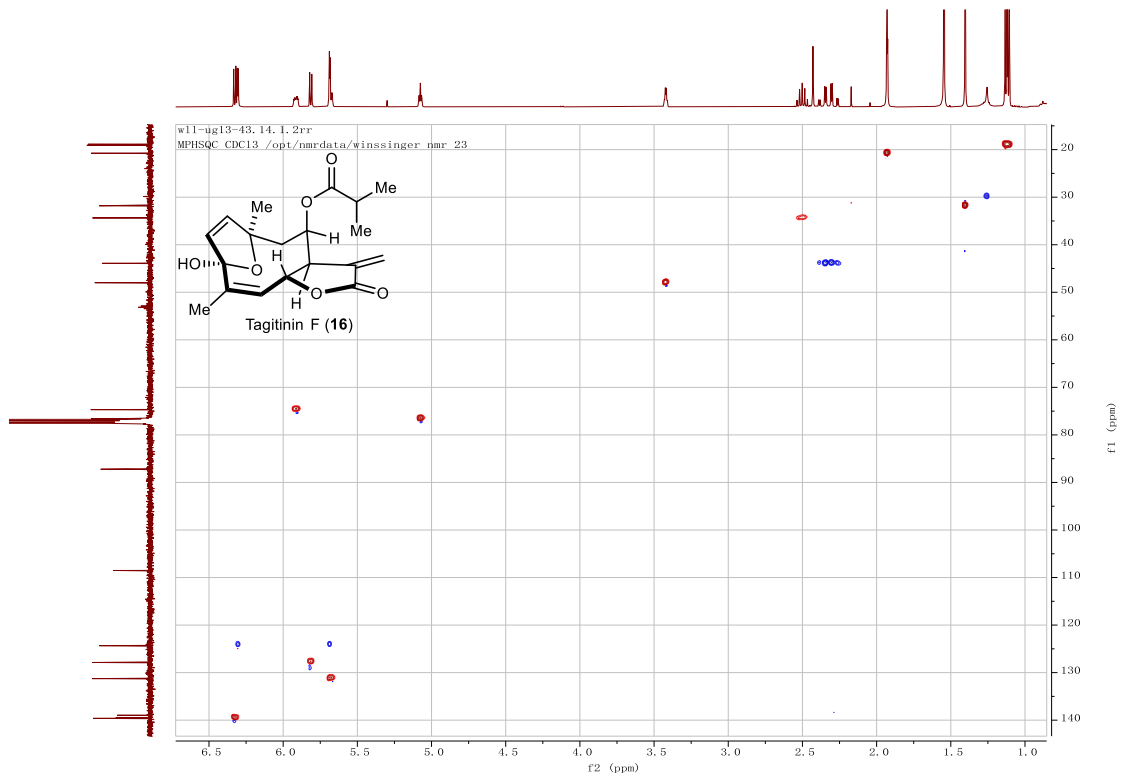



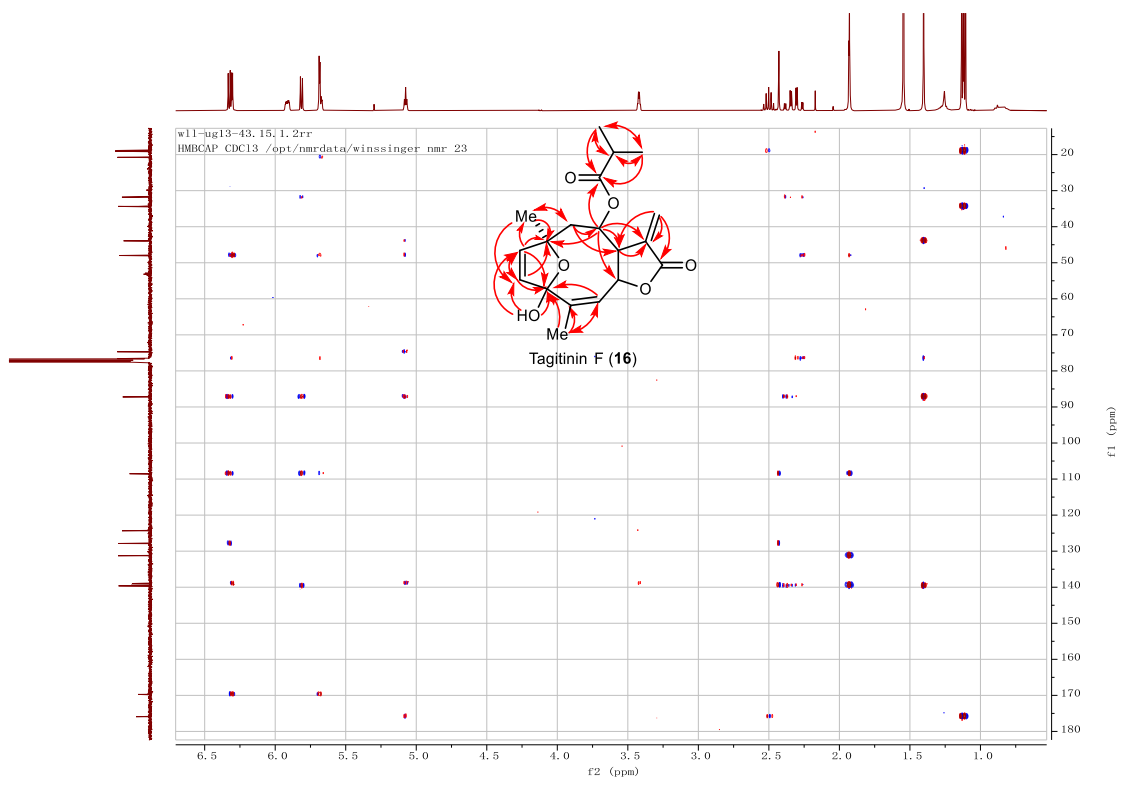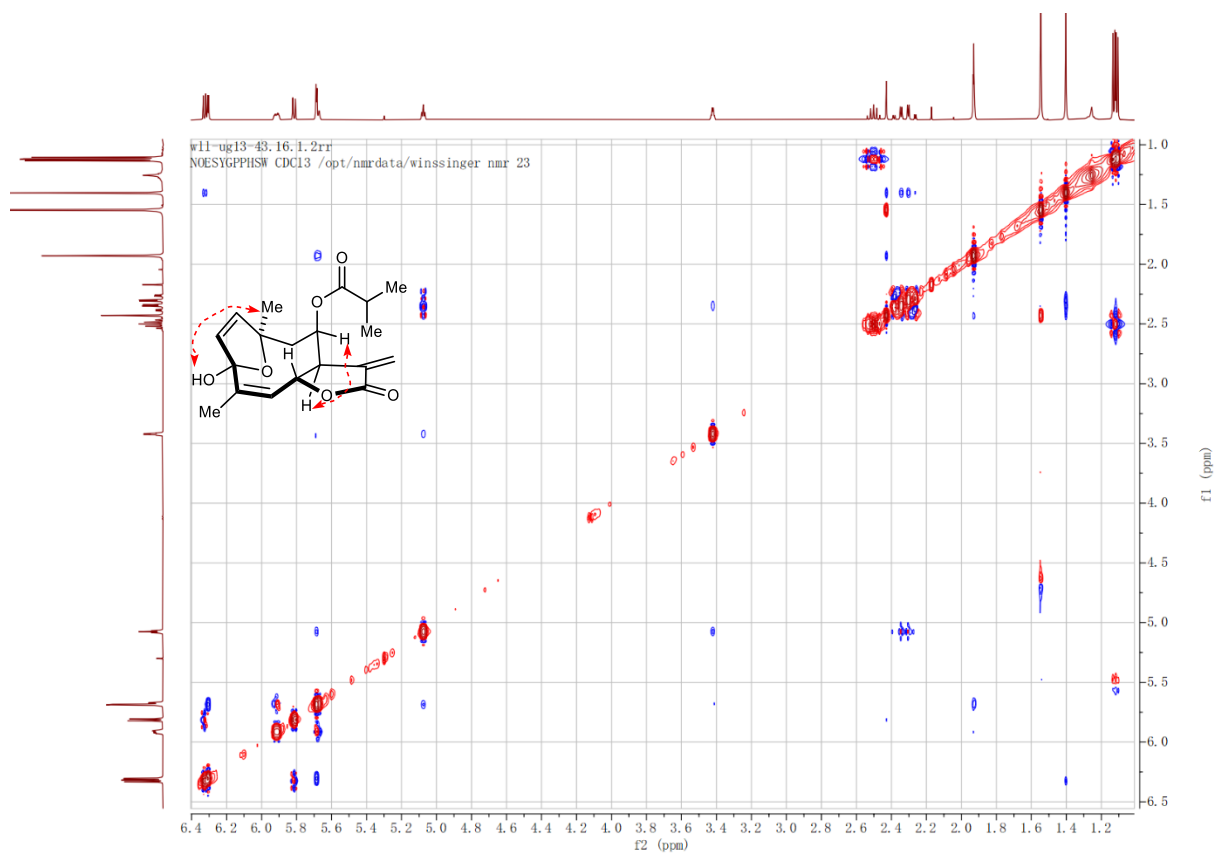

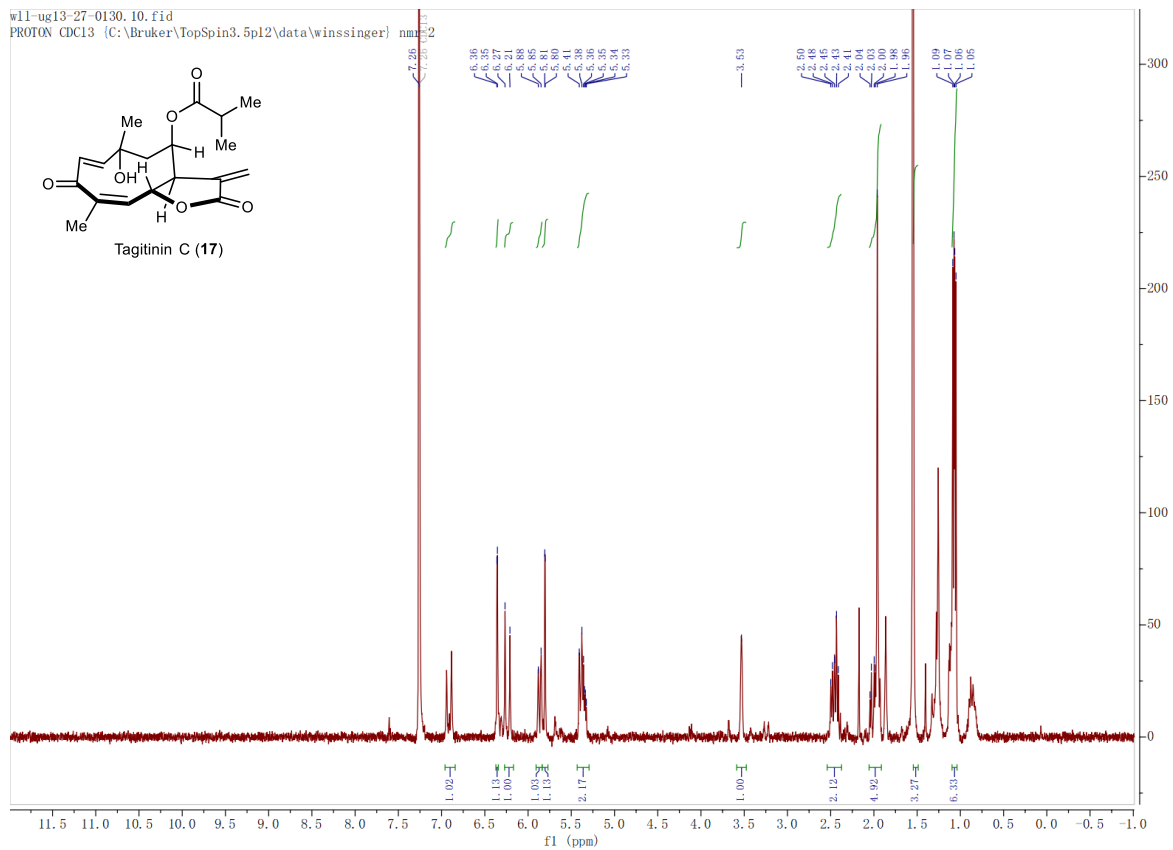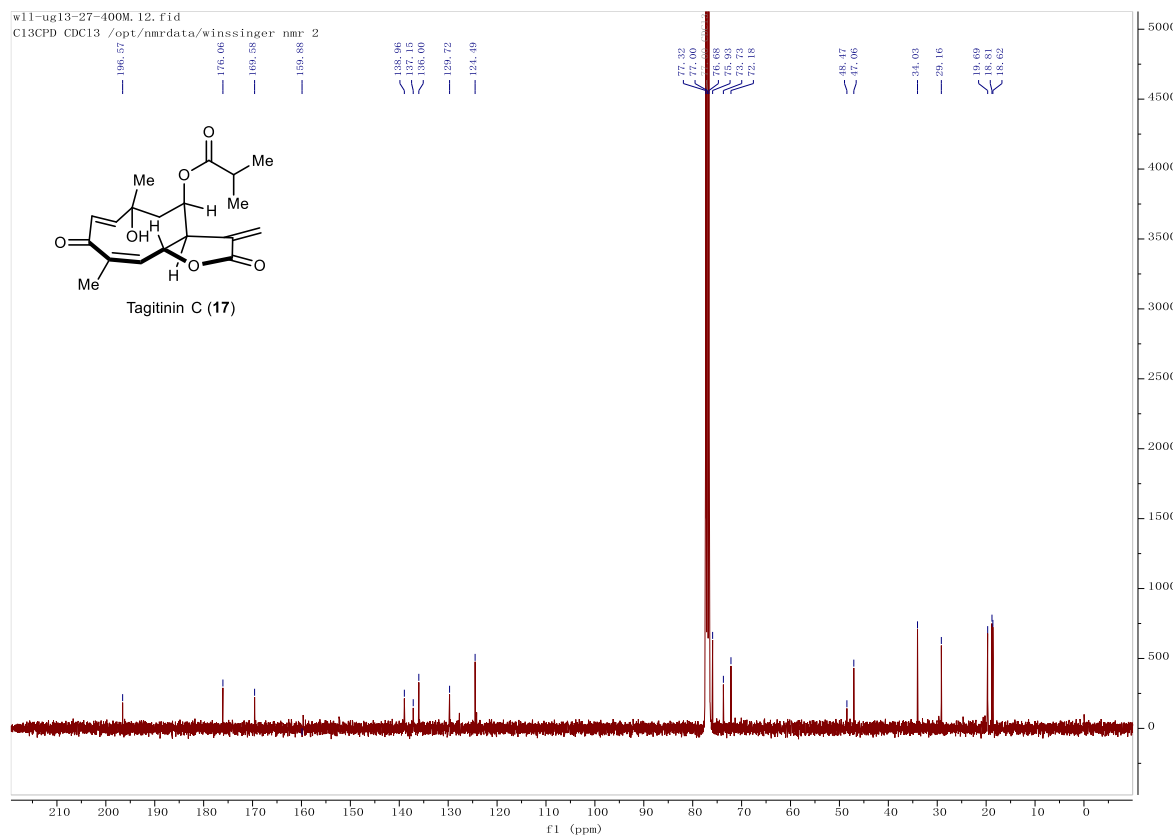

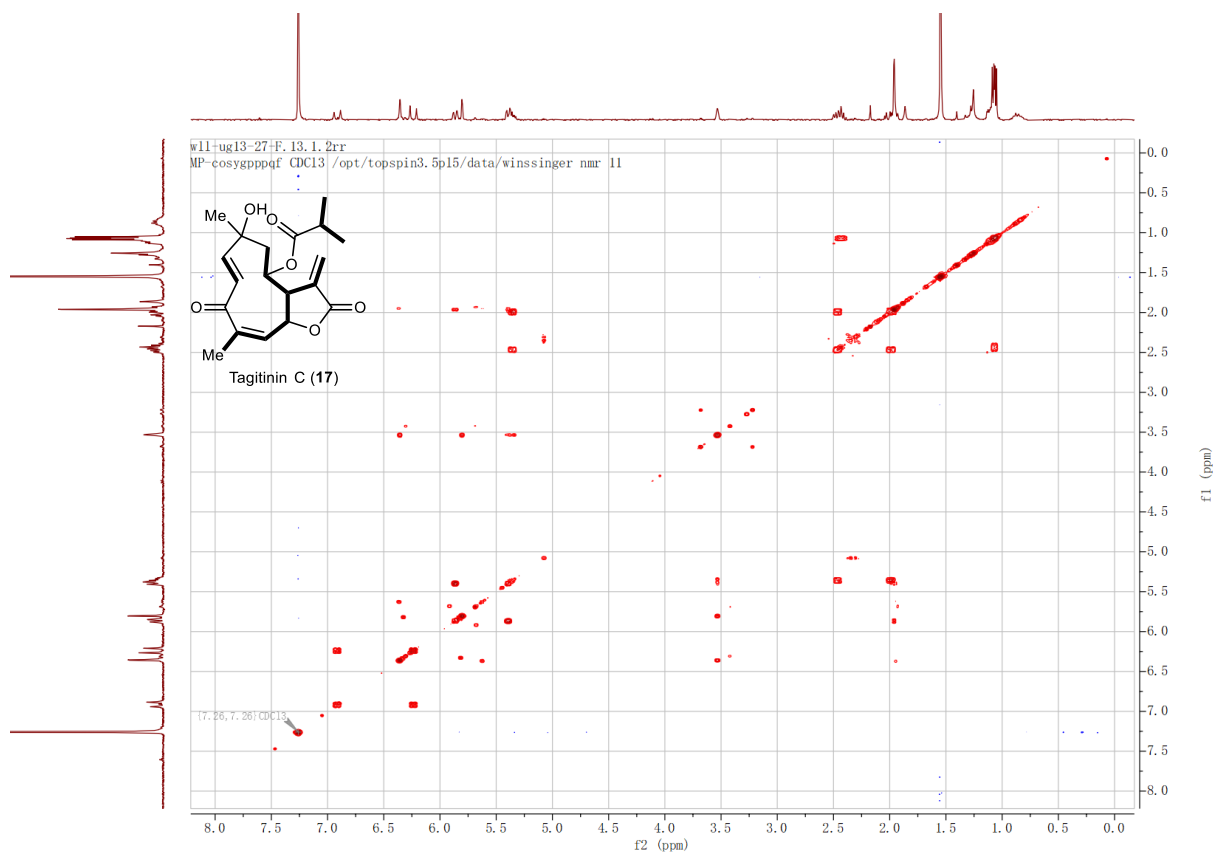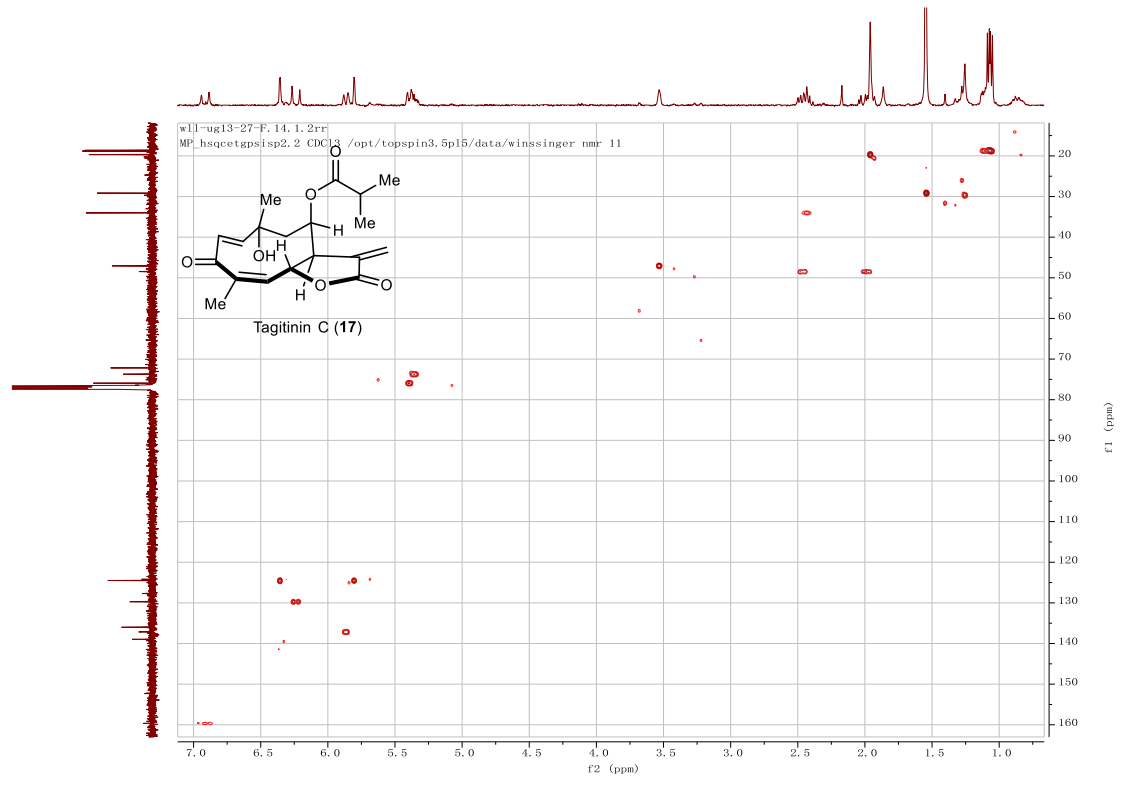

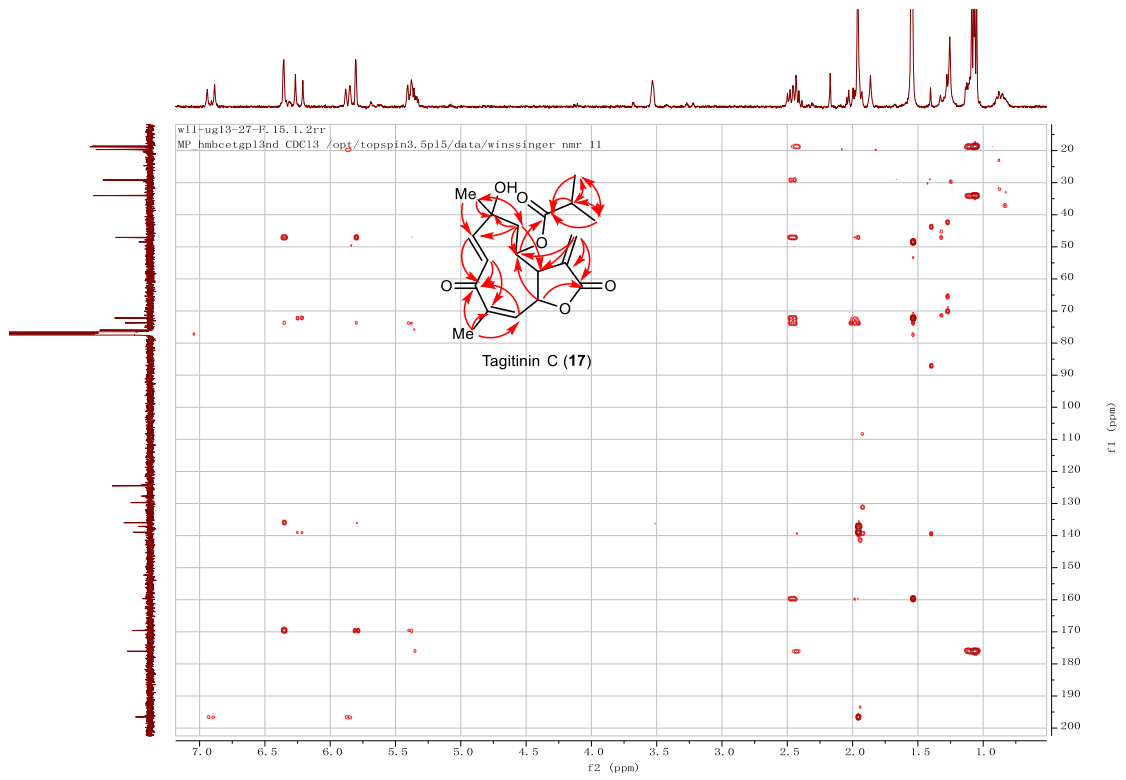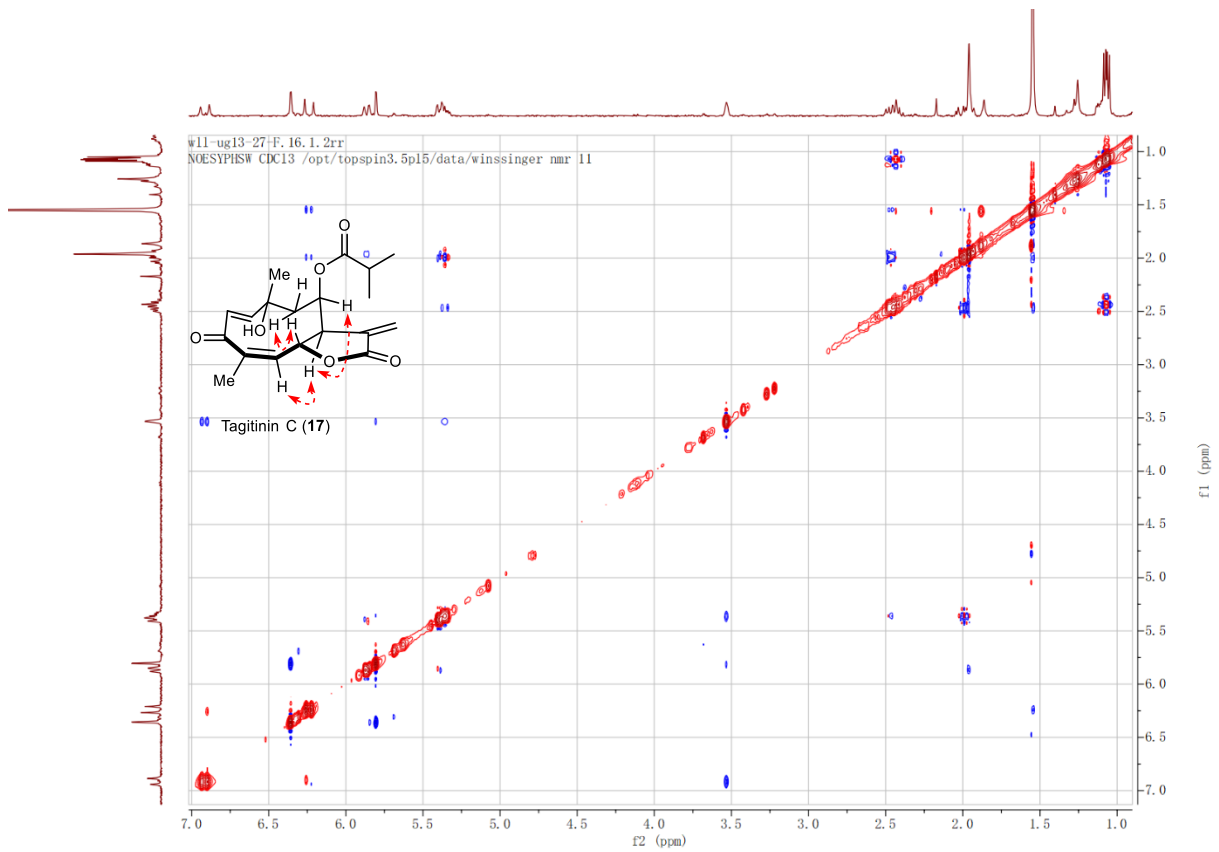

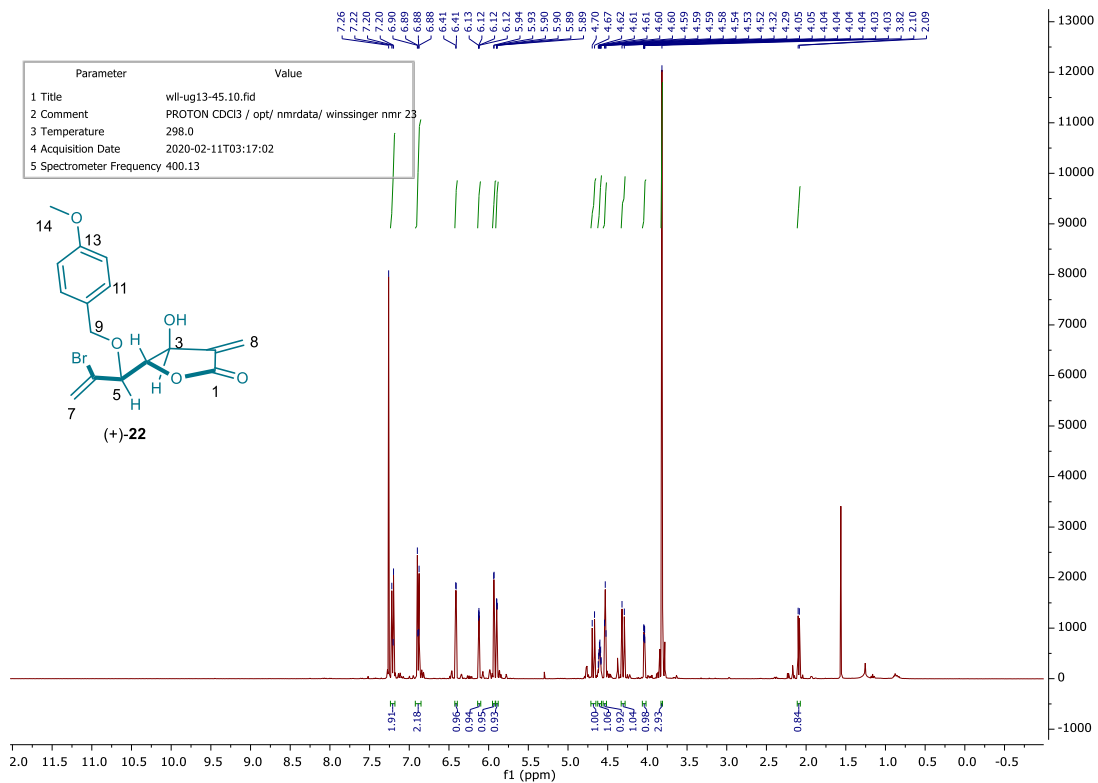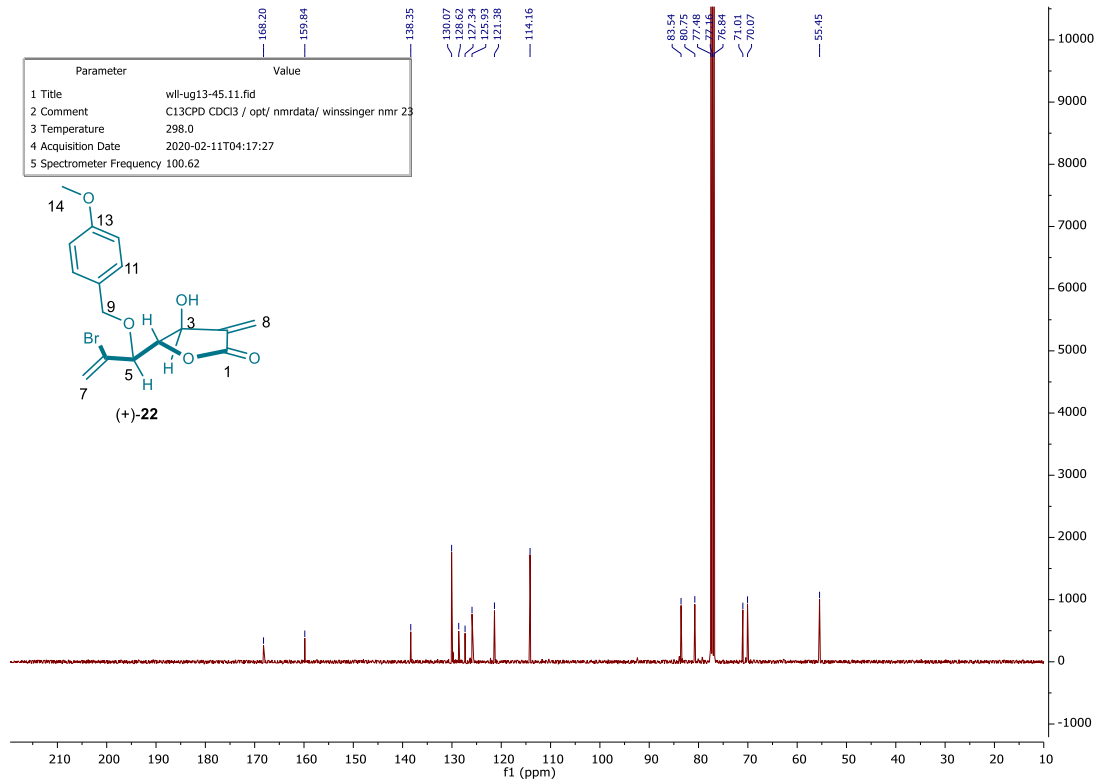

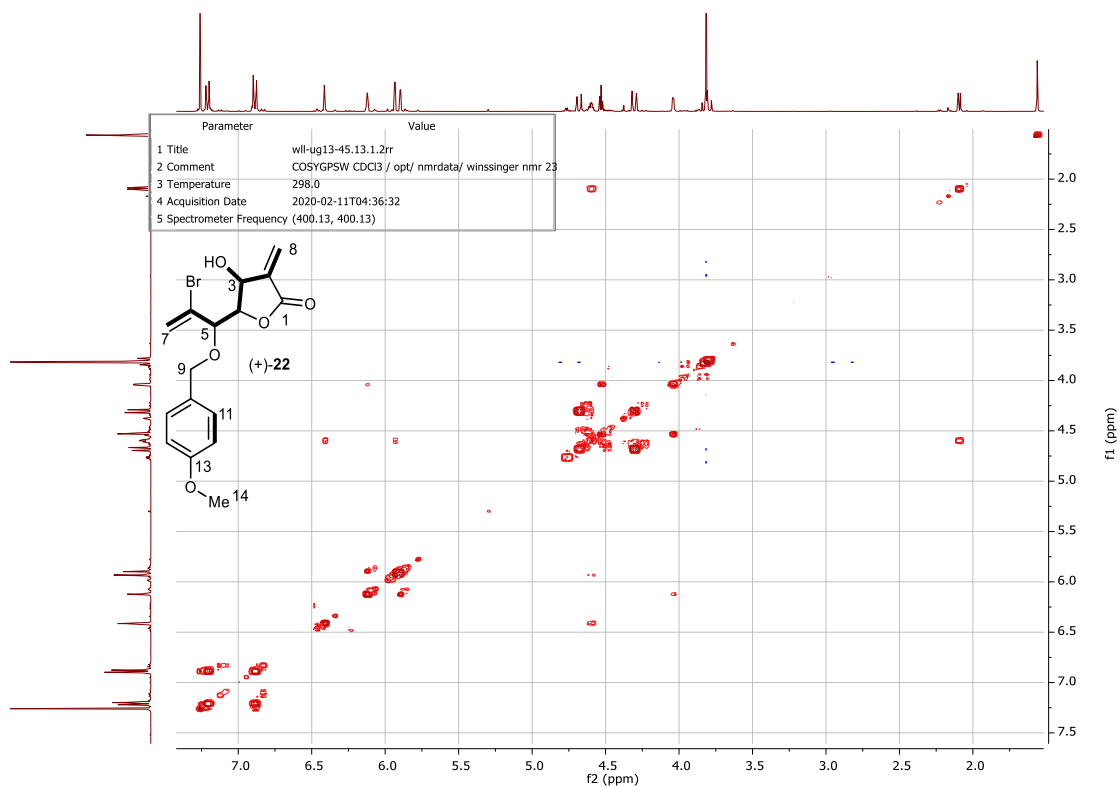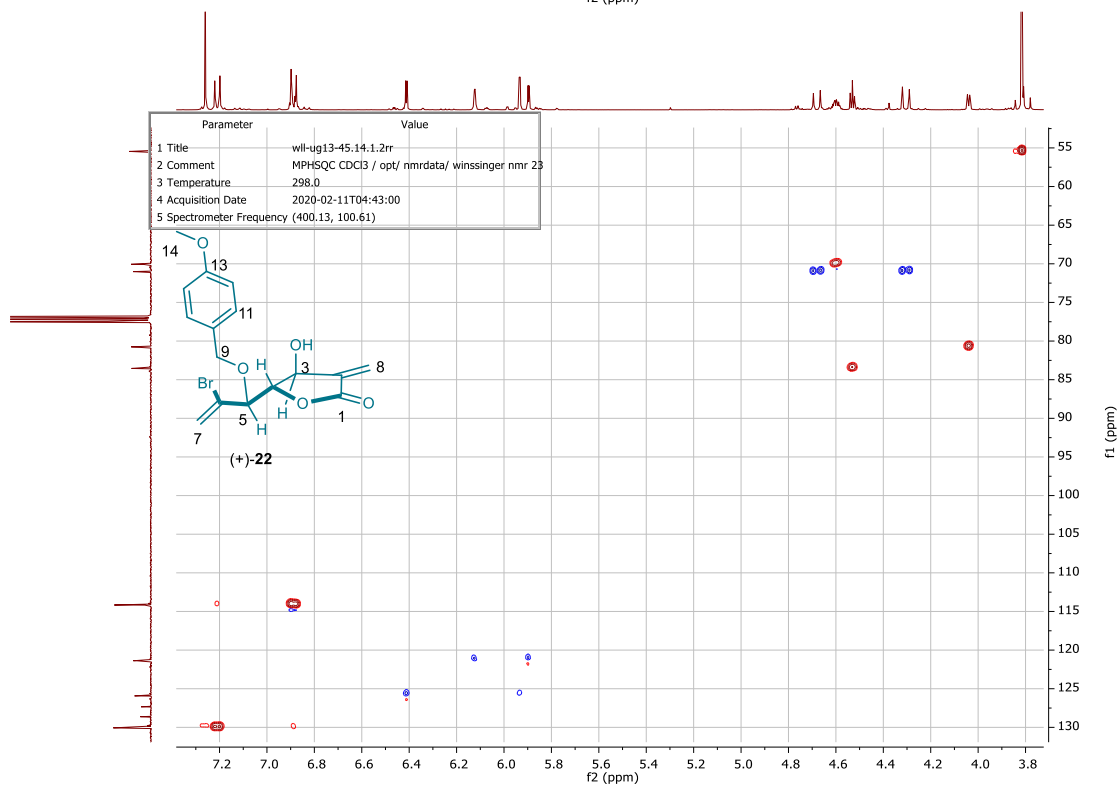

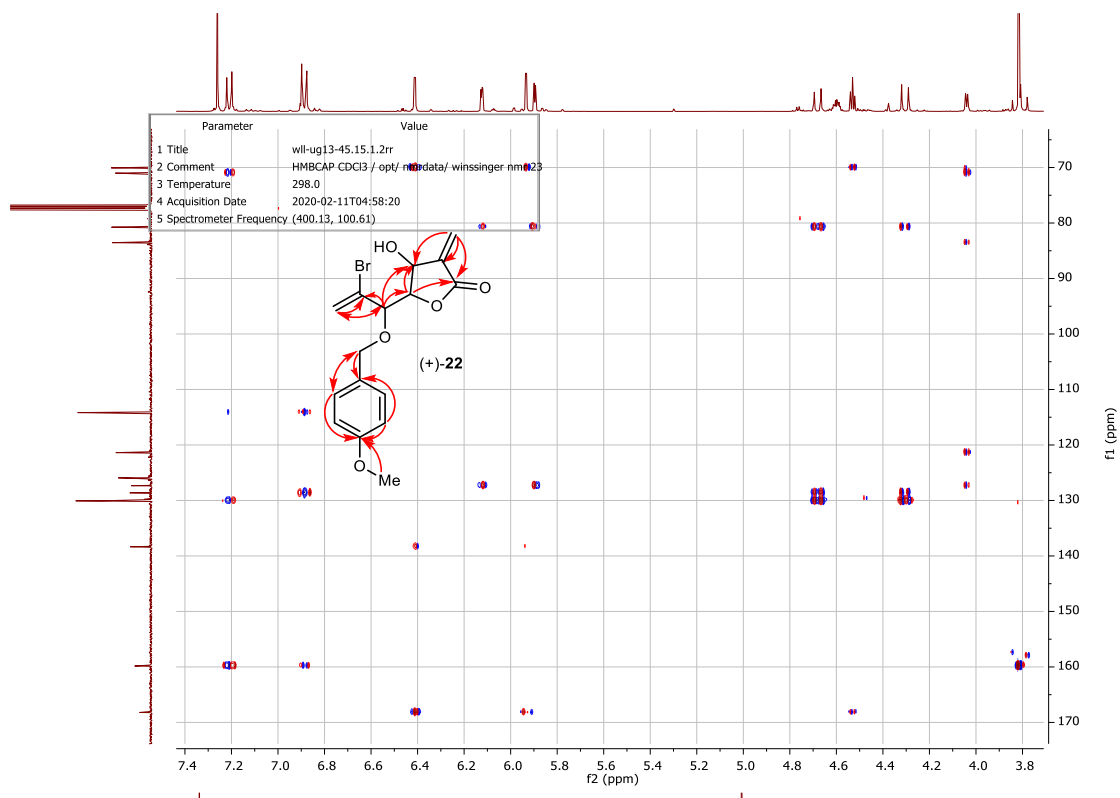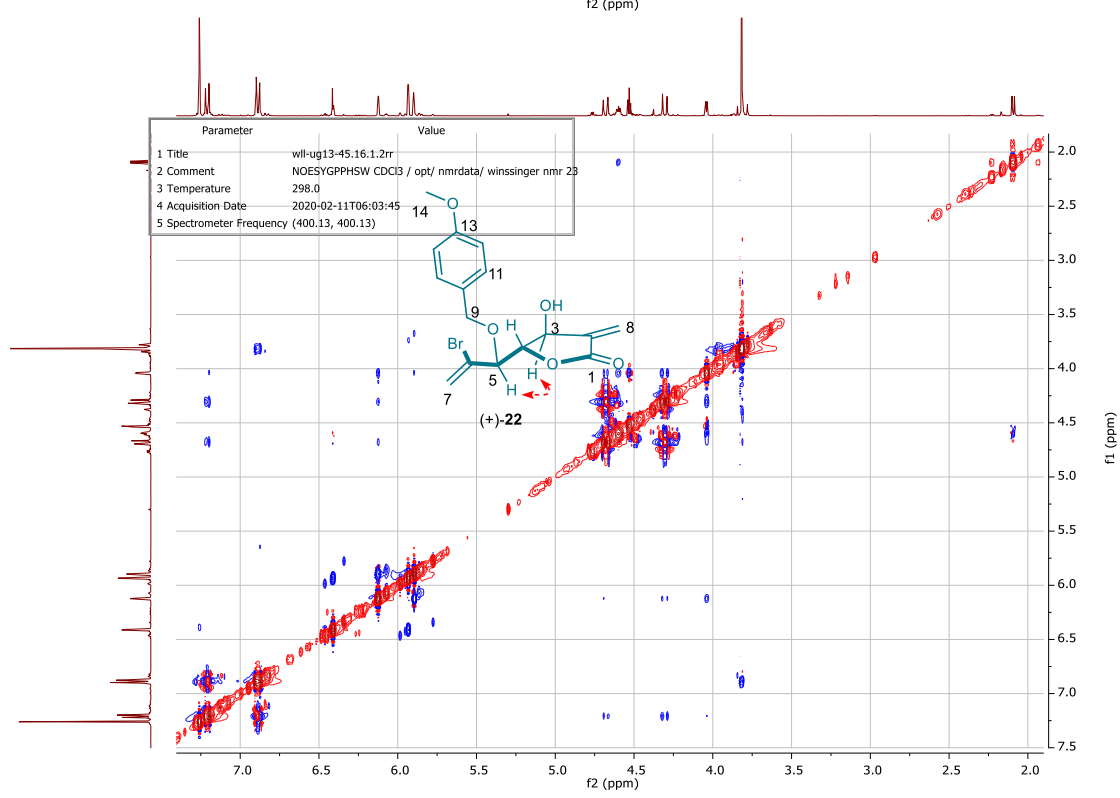

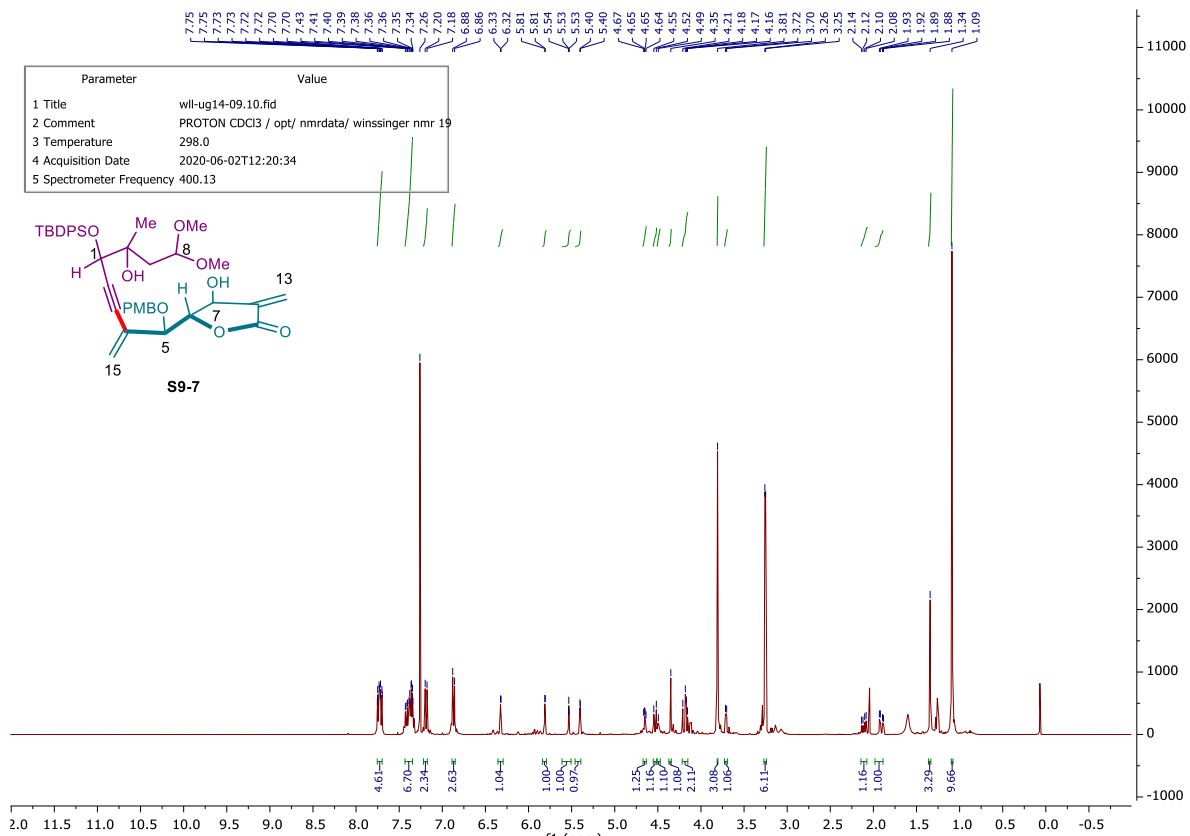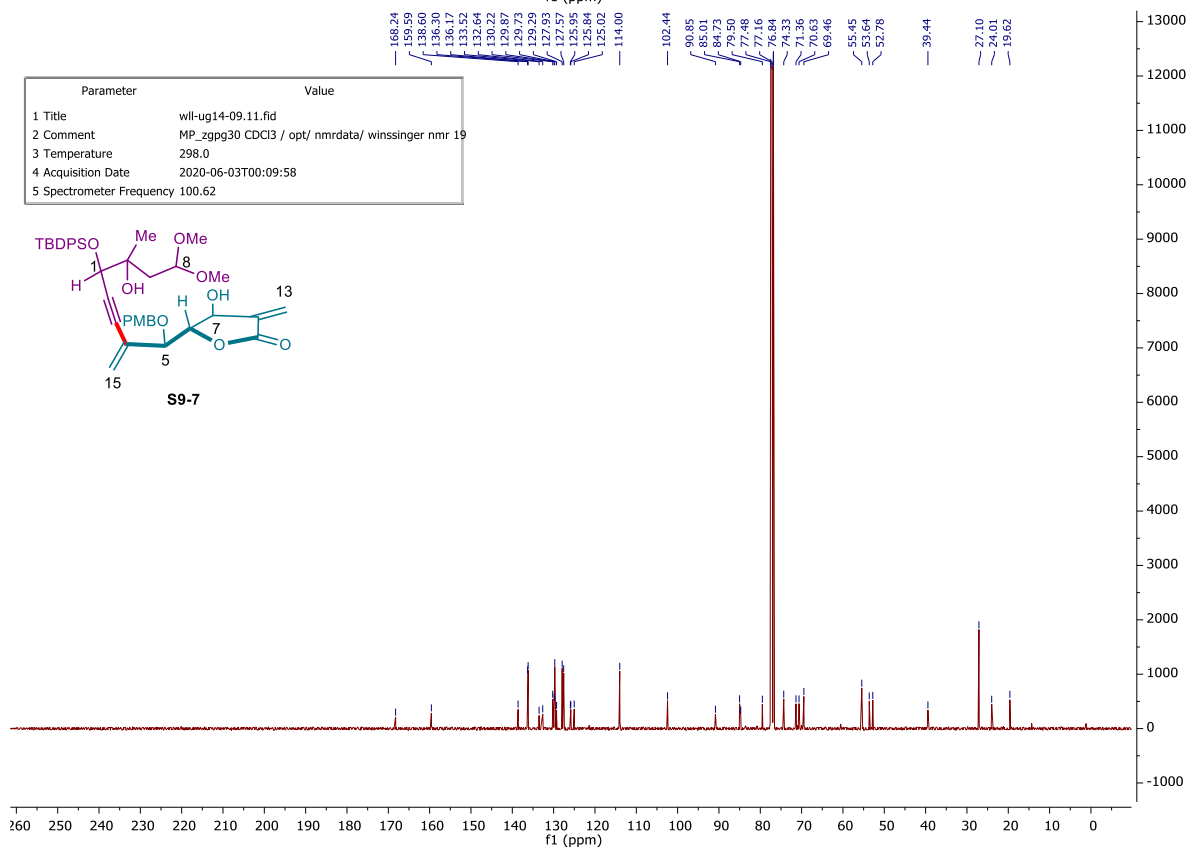



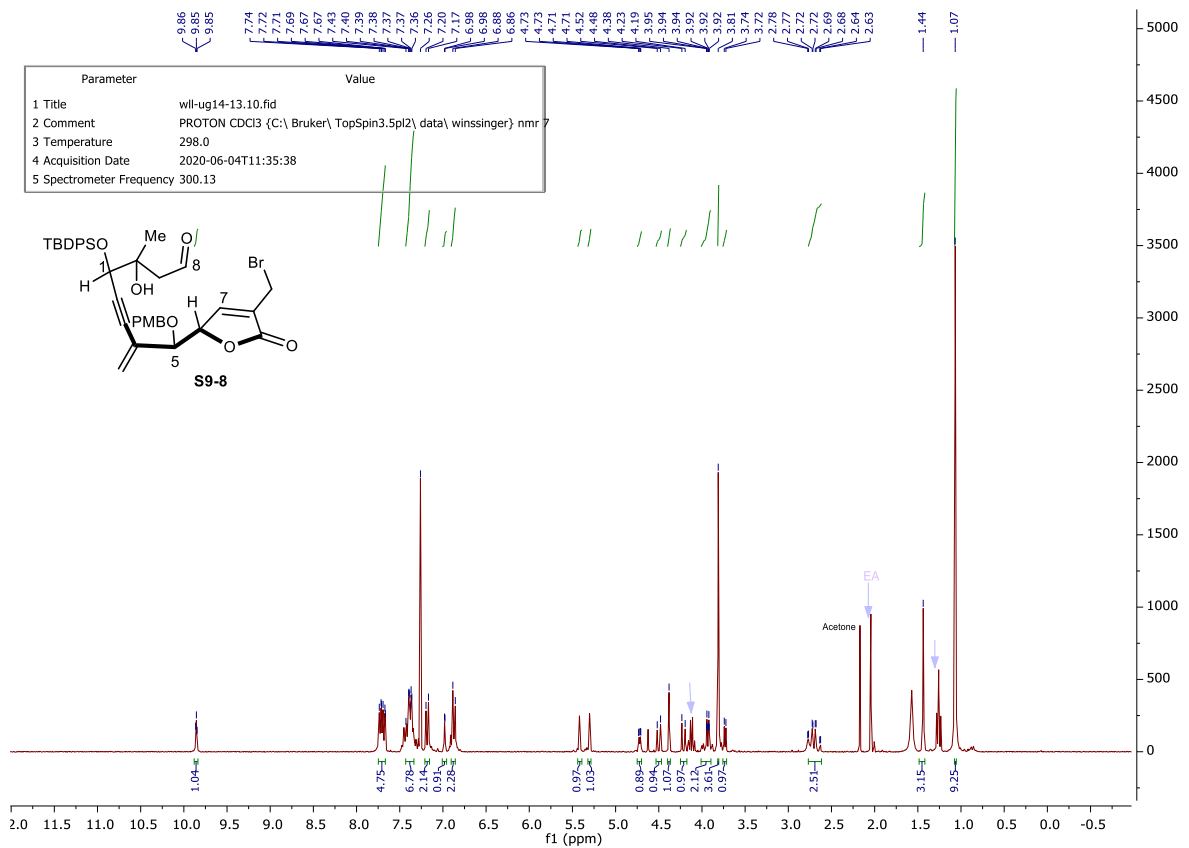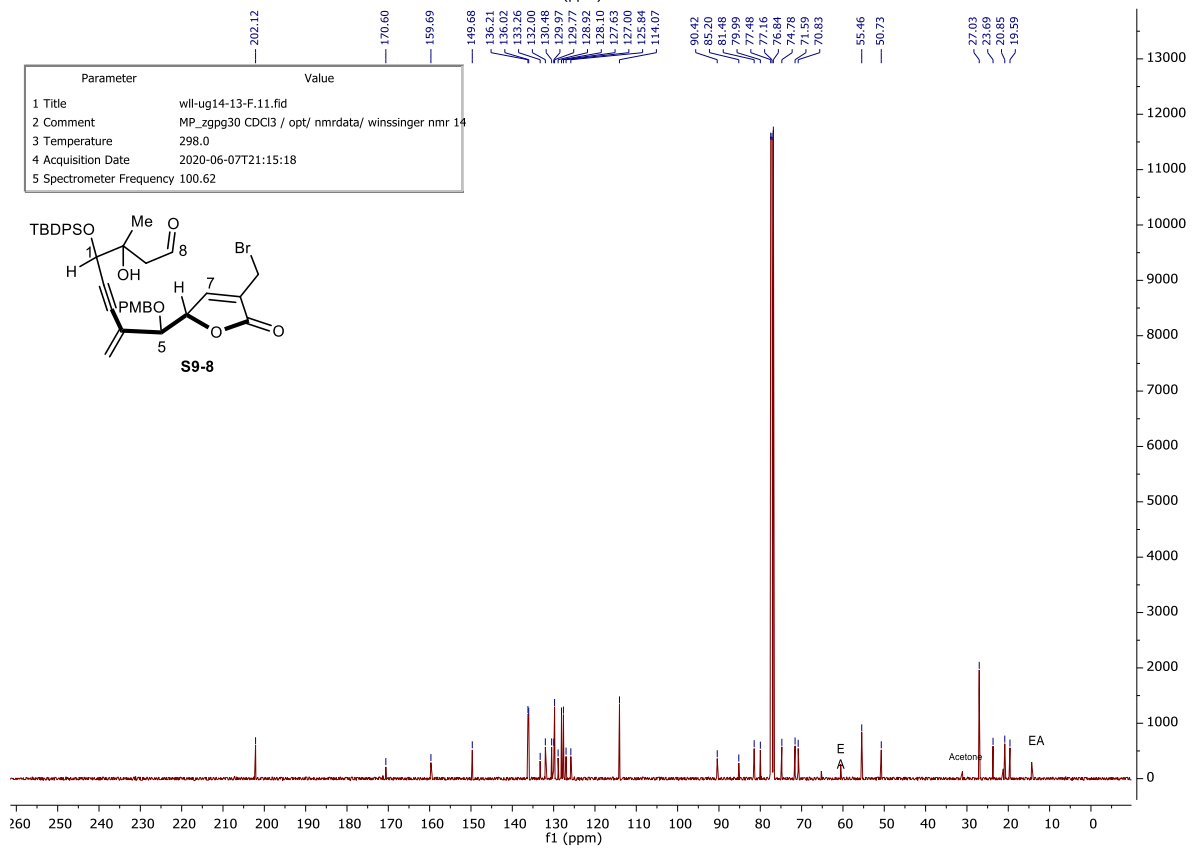

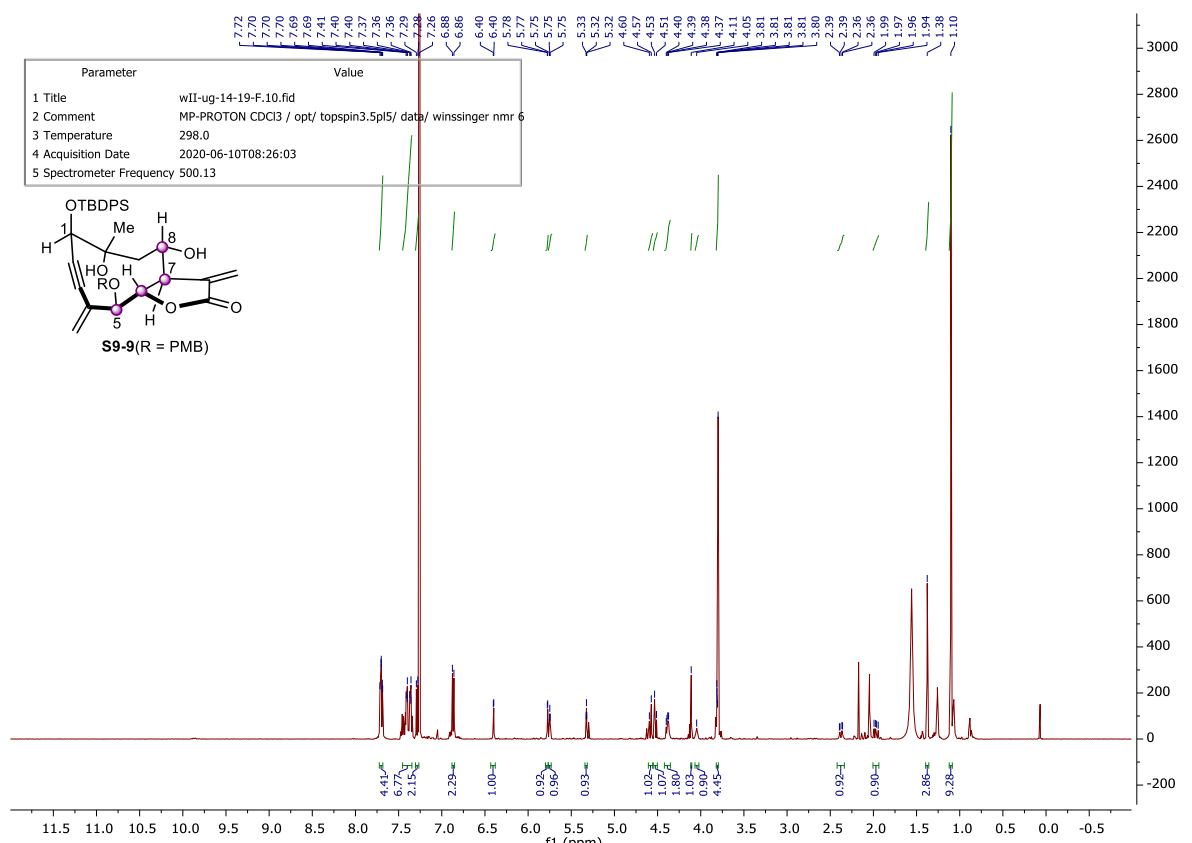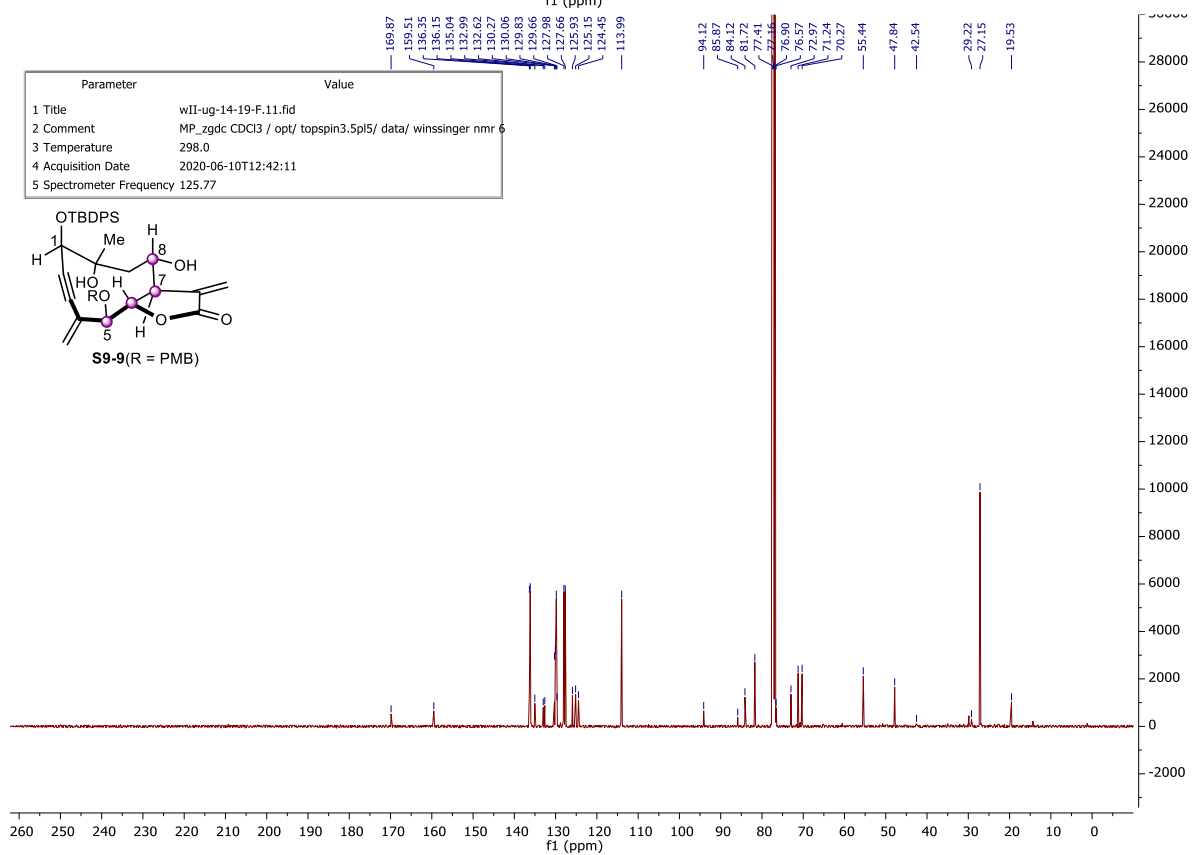

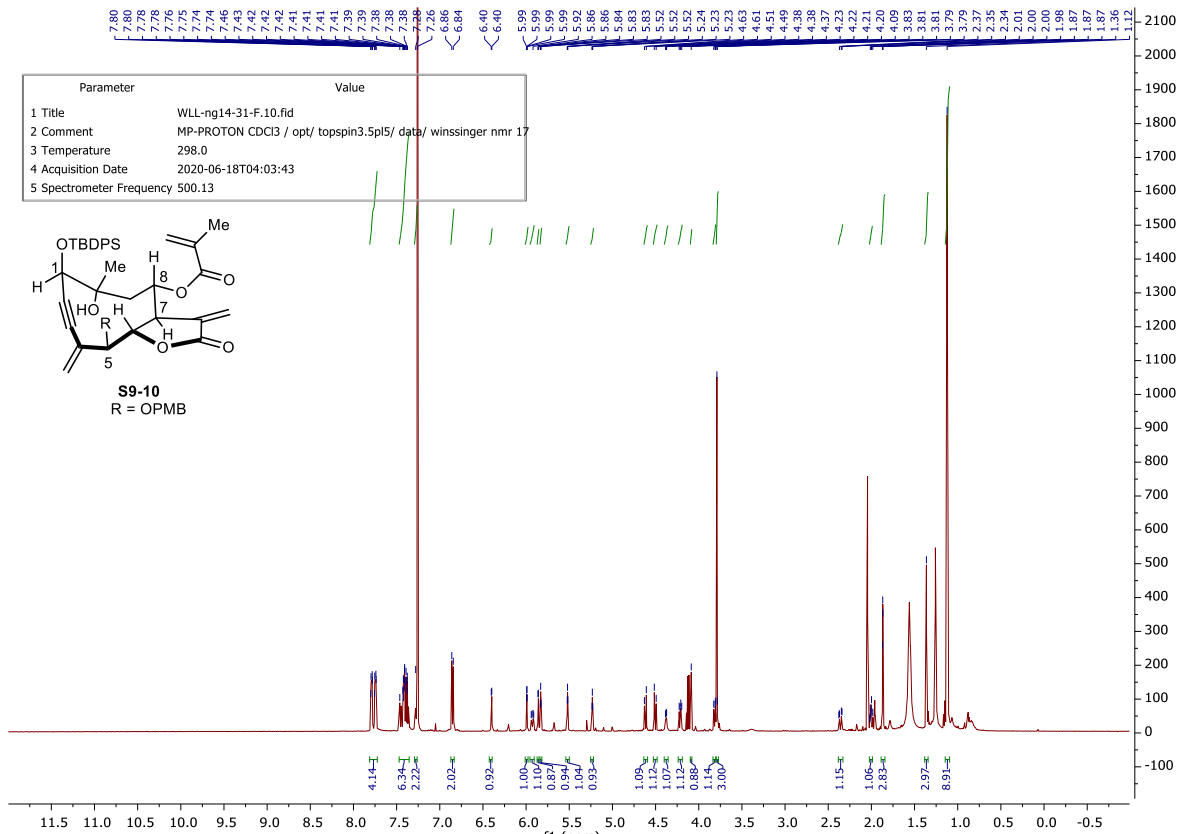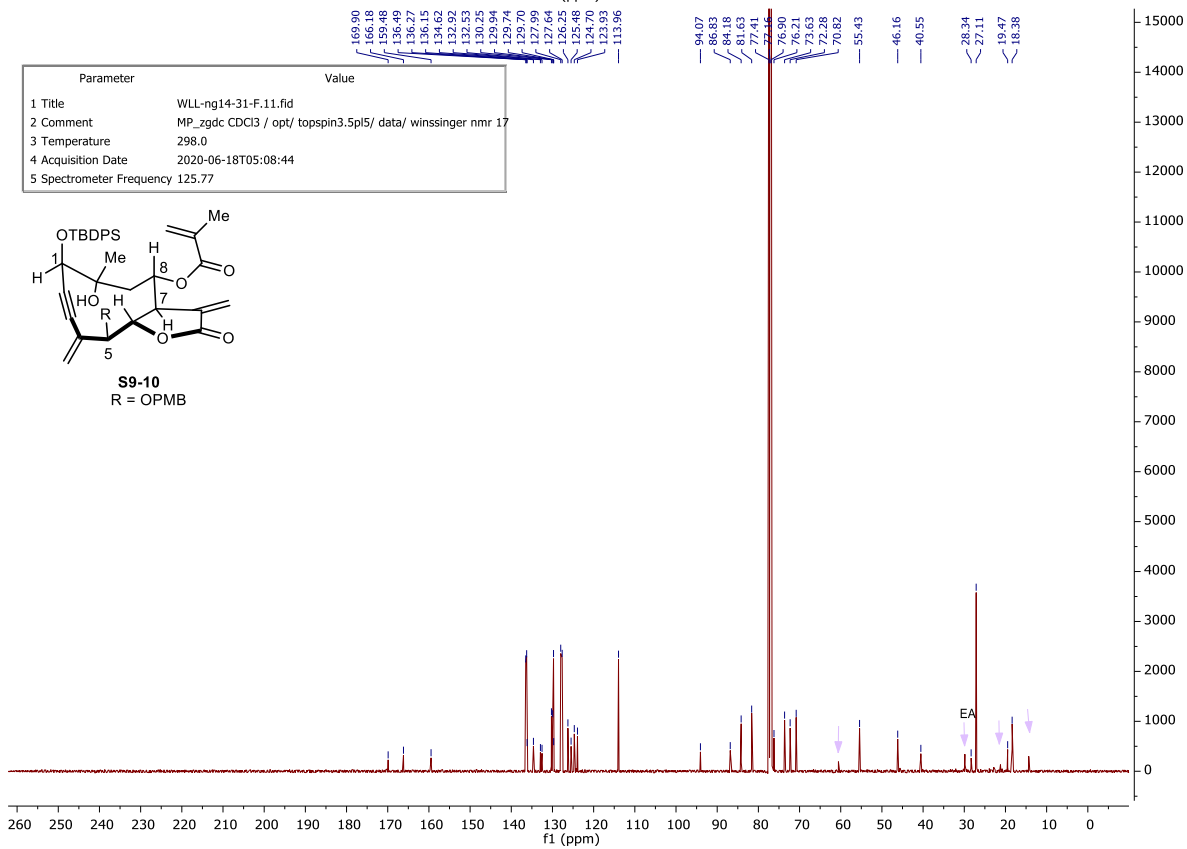

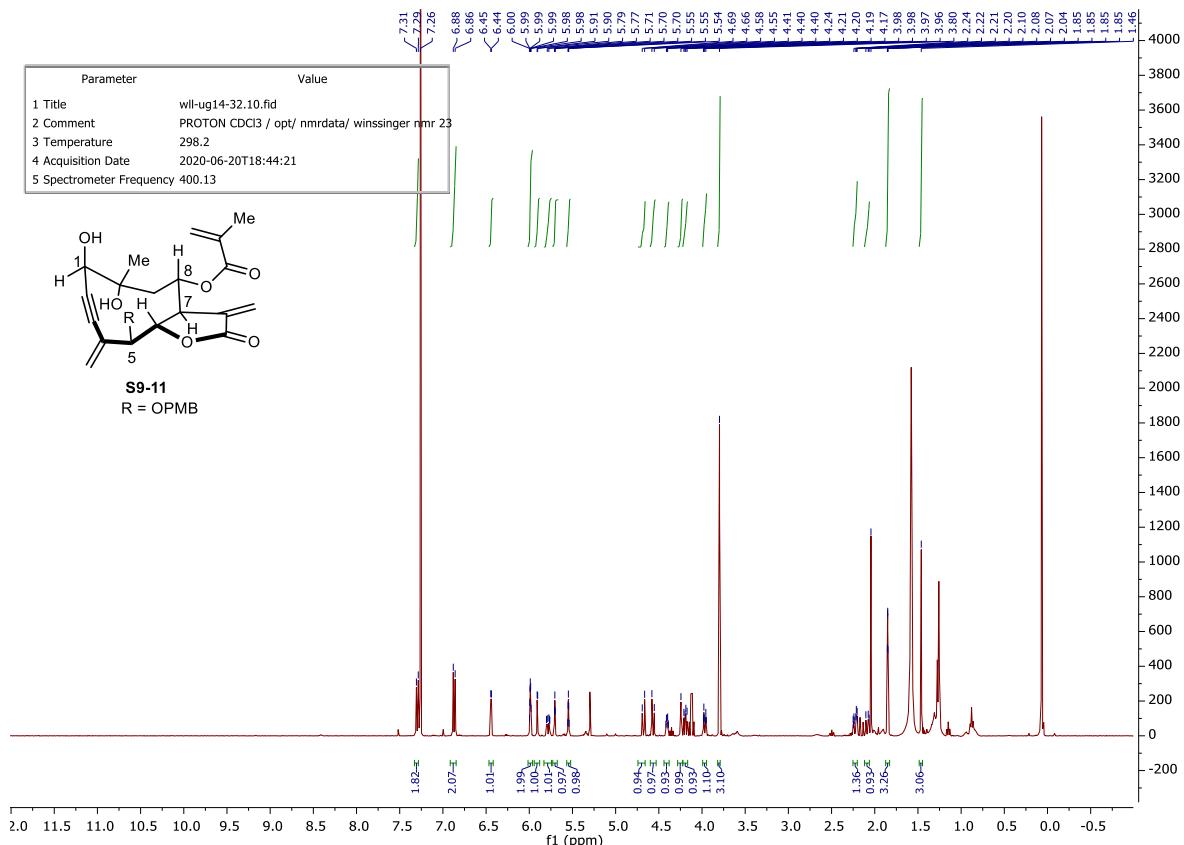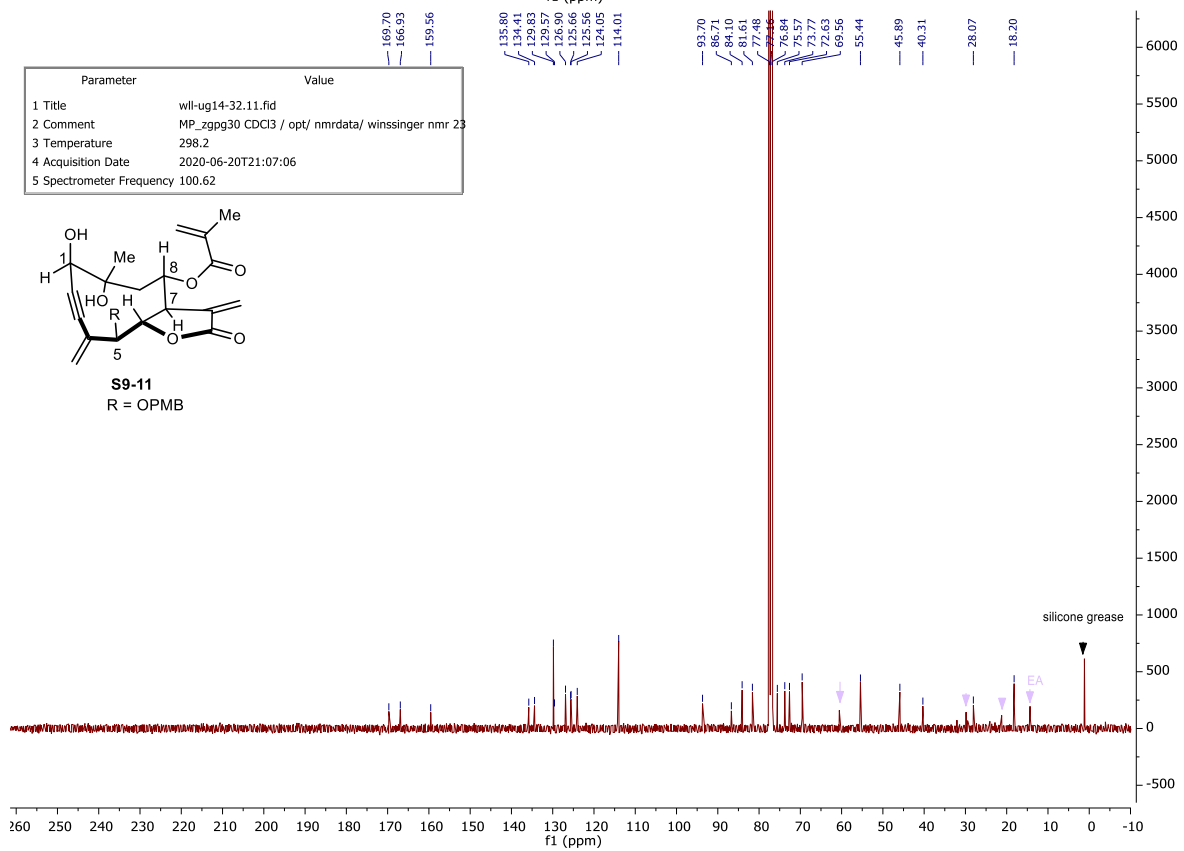

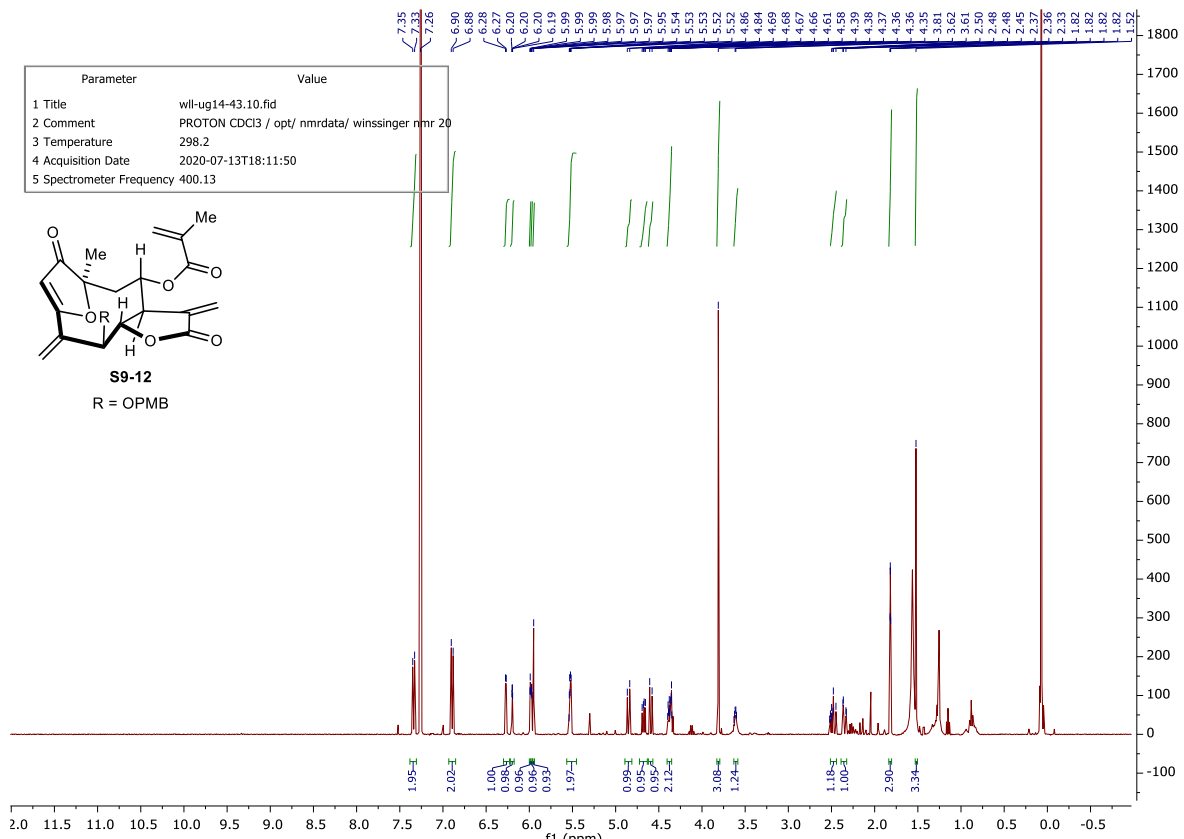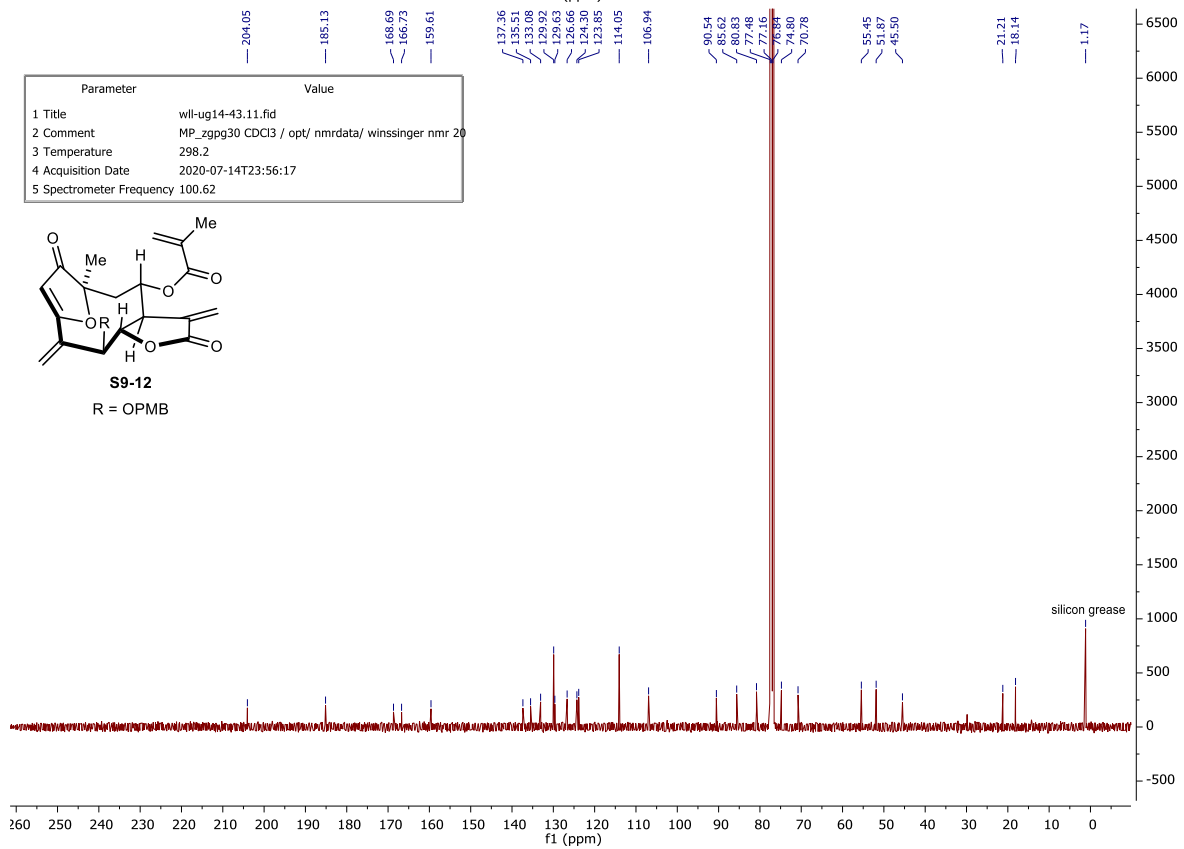

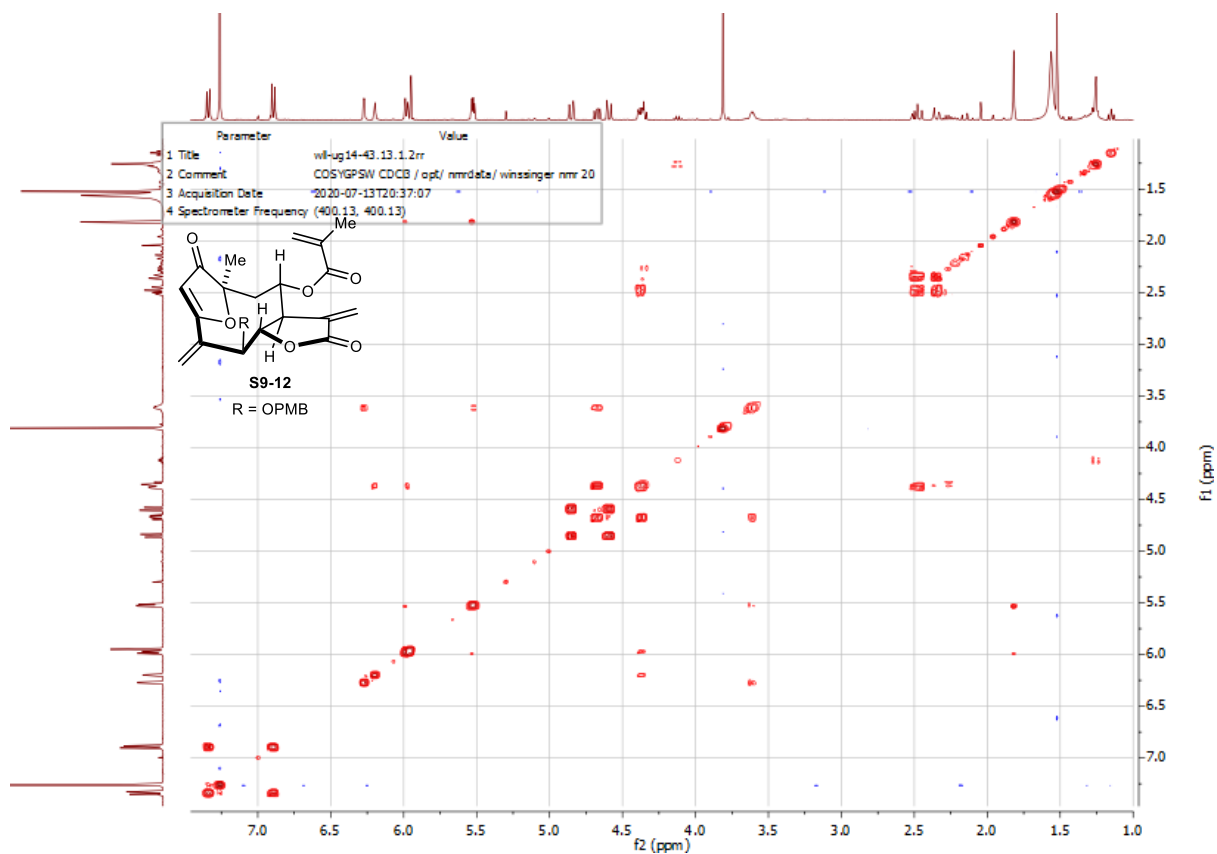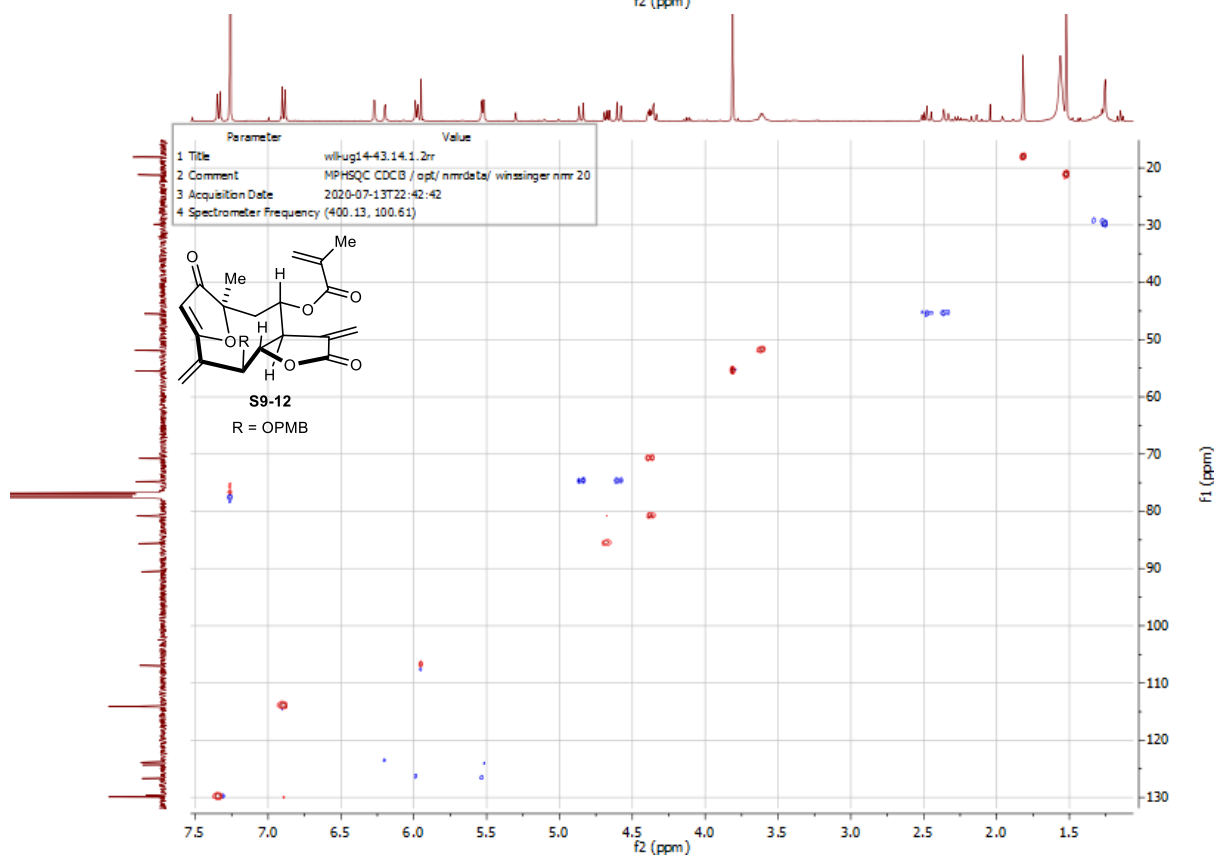

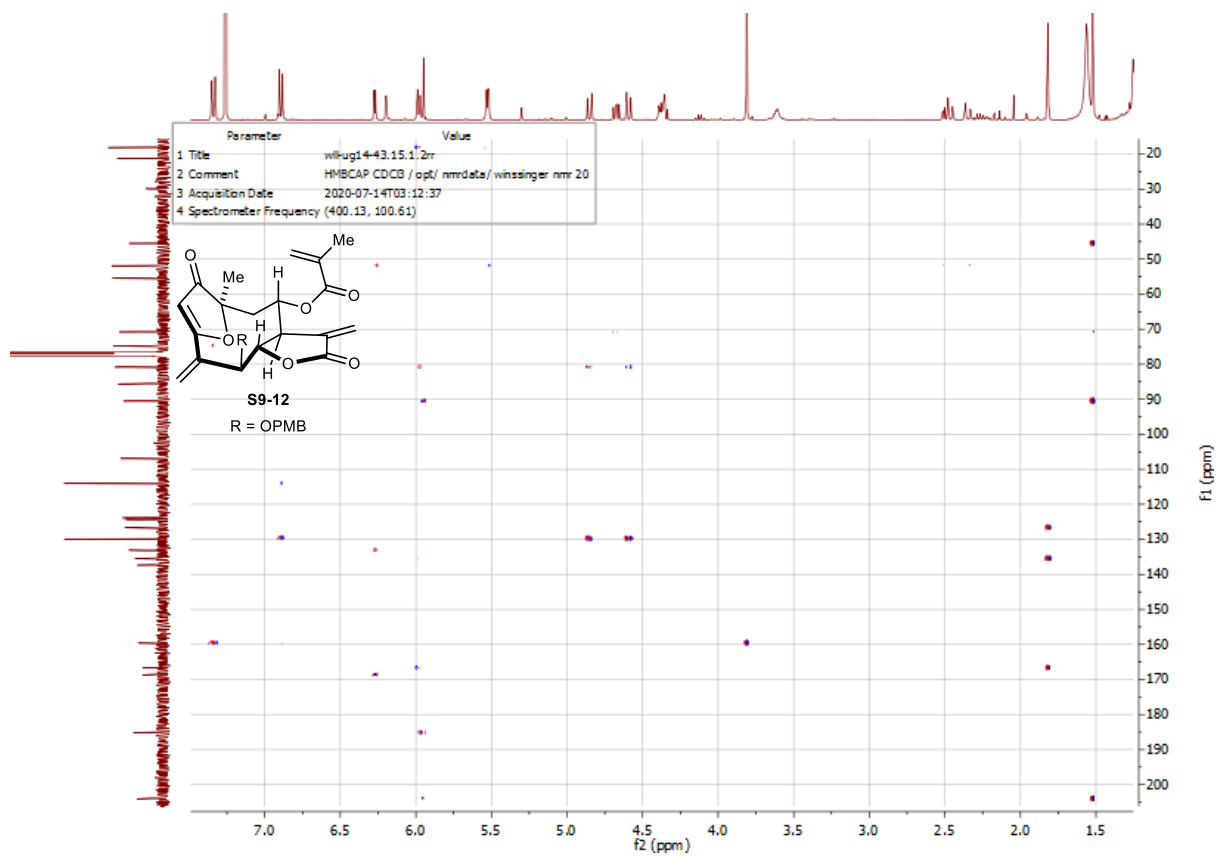

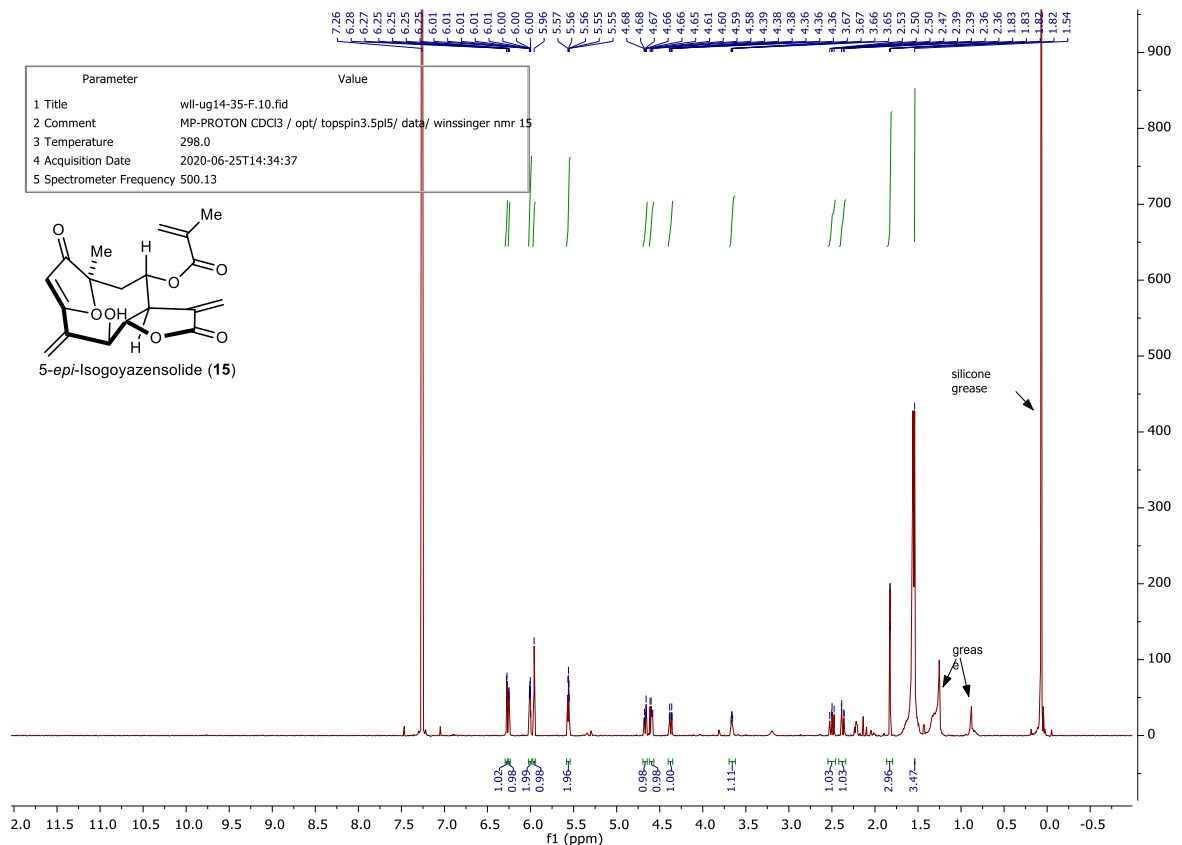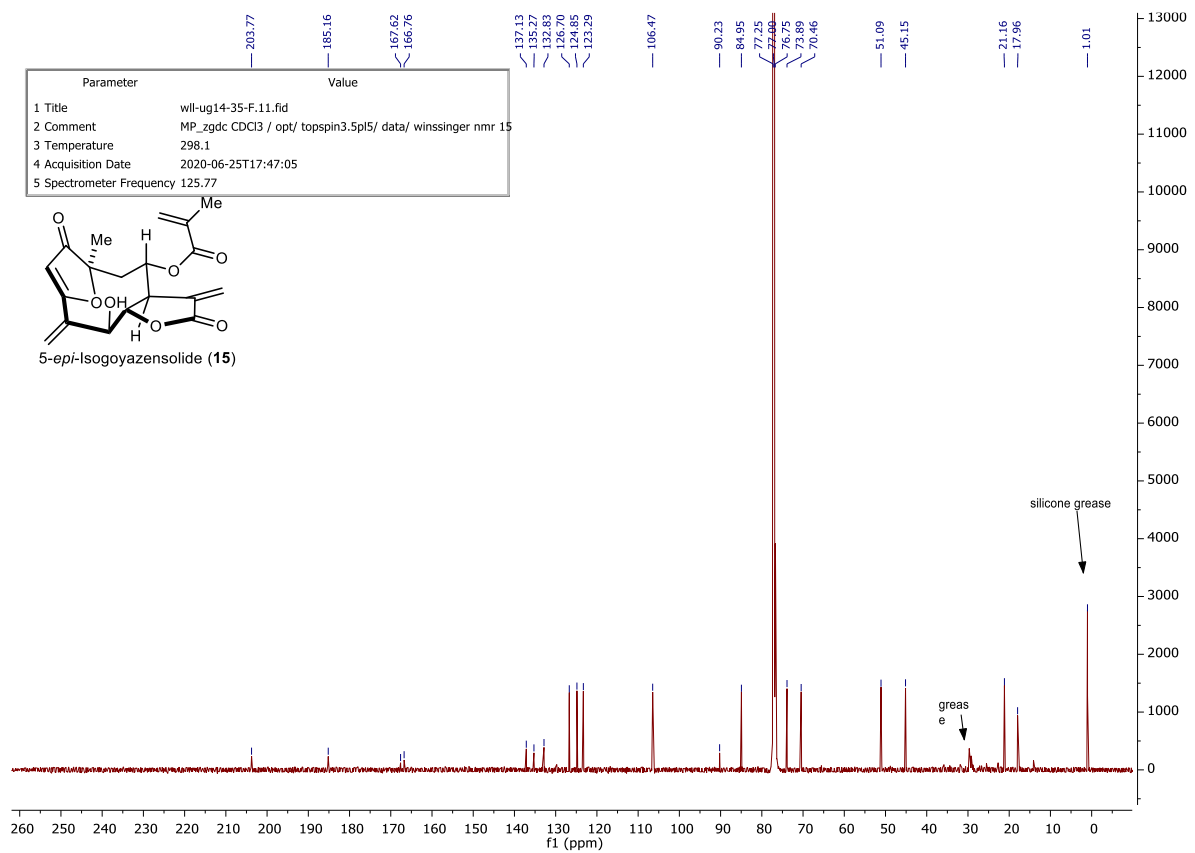



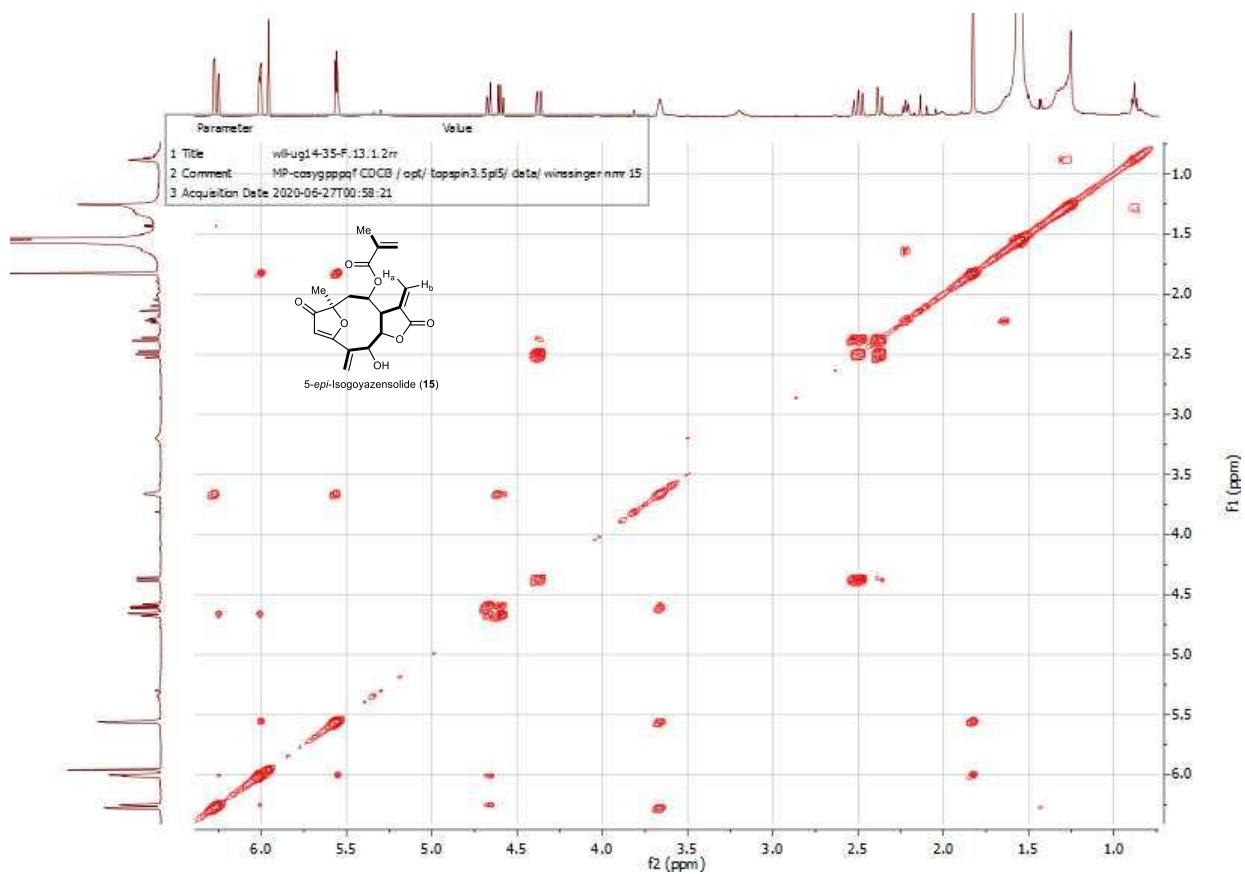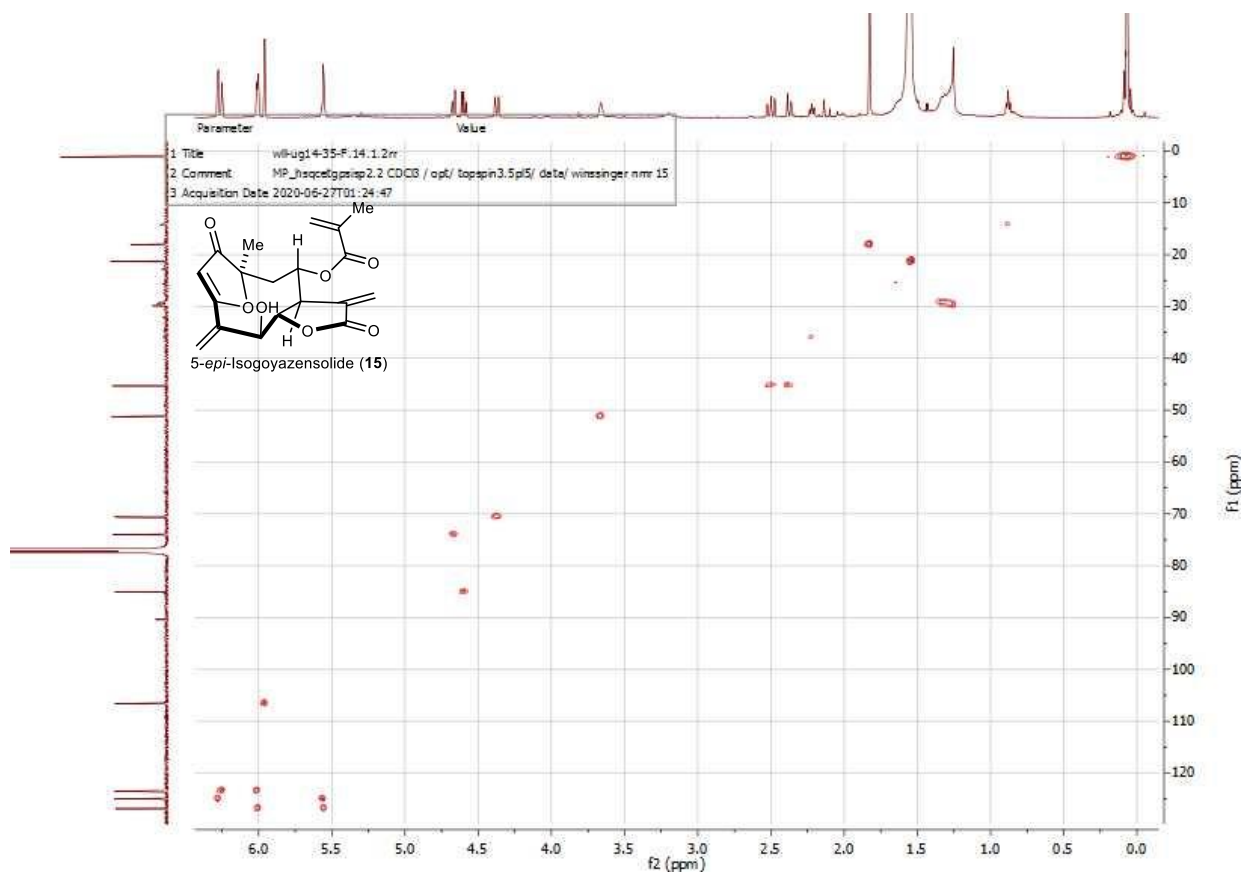

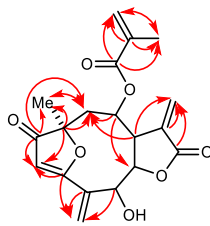

5-*epi*-Isogoyazensolide (15)

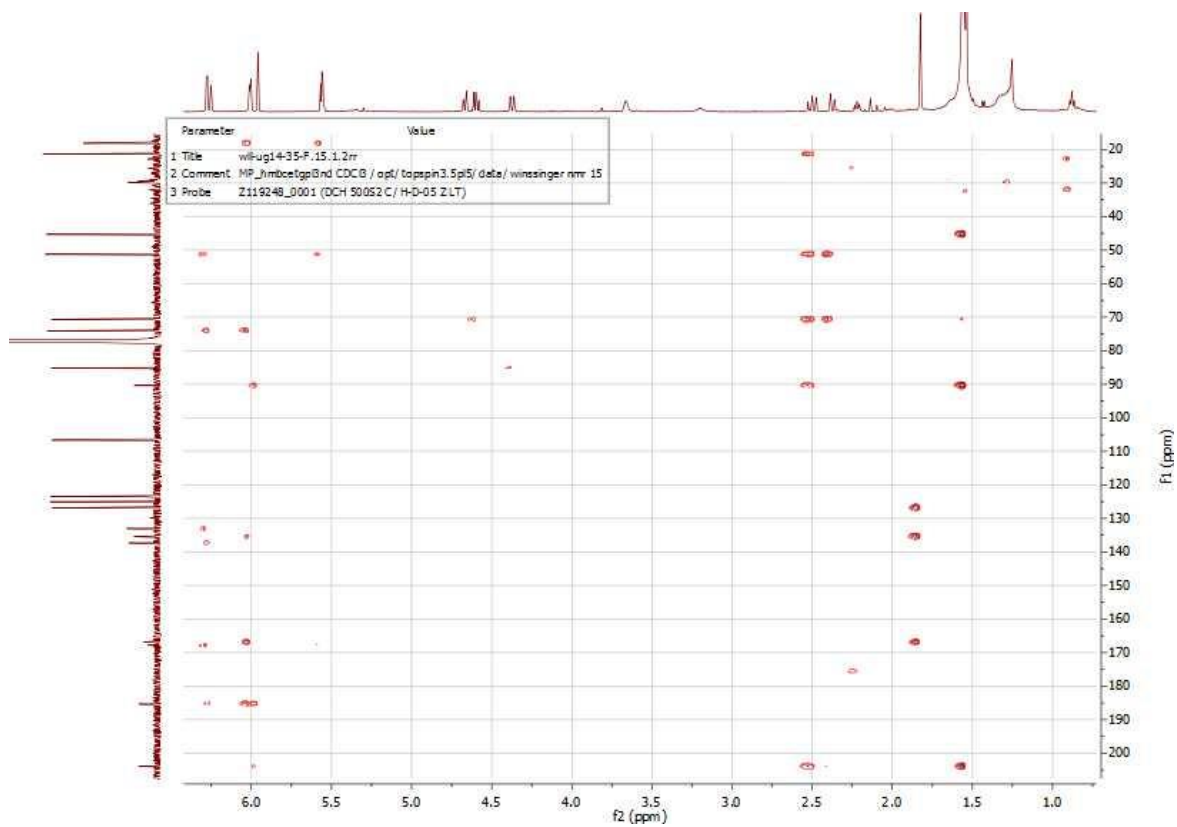

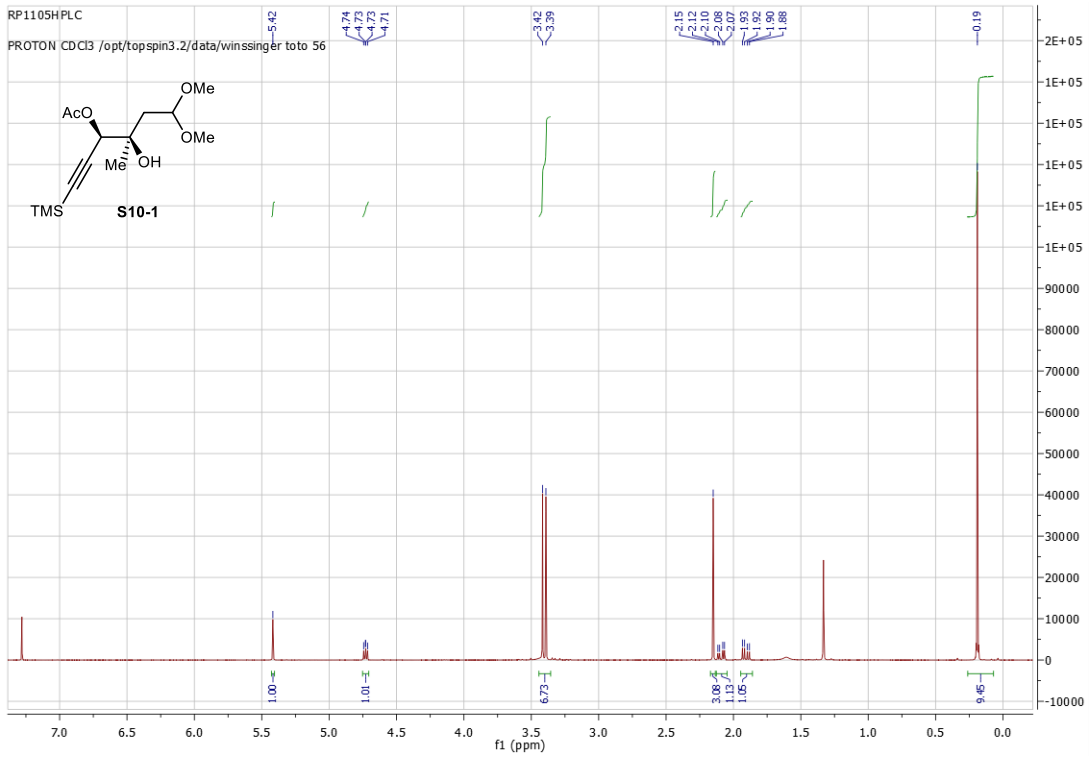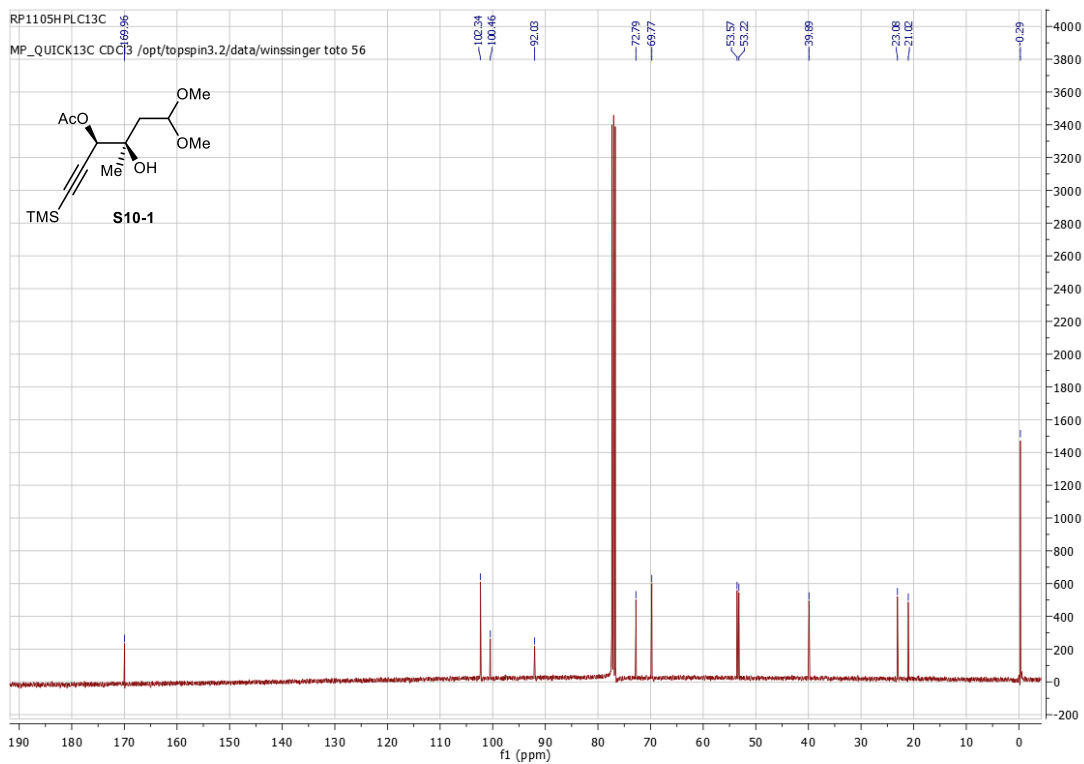

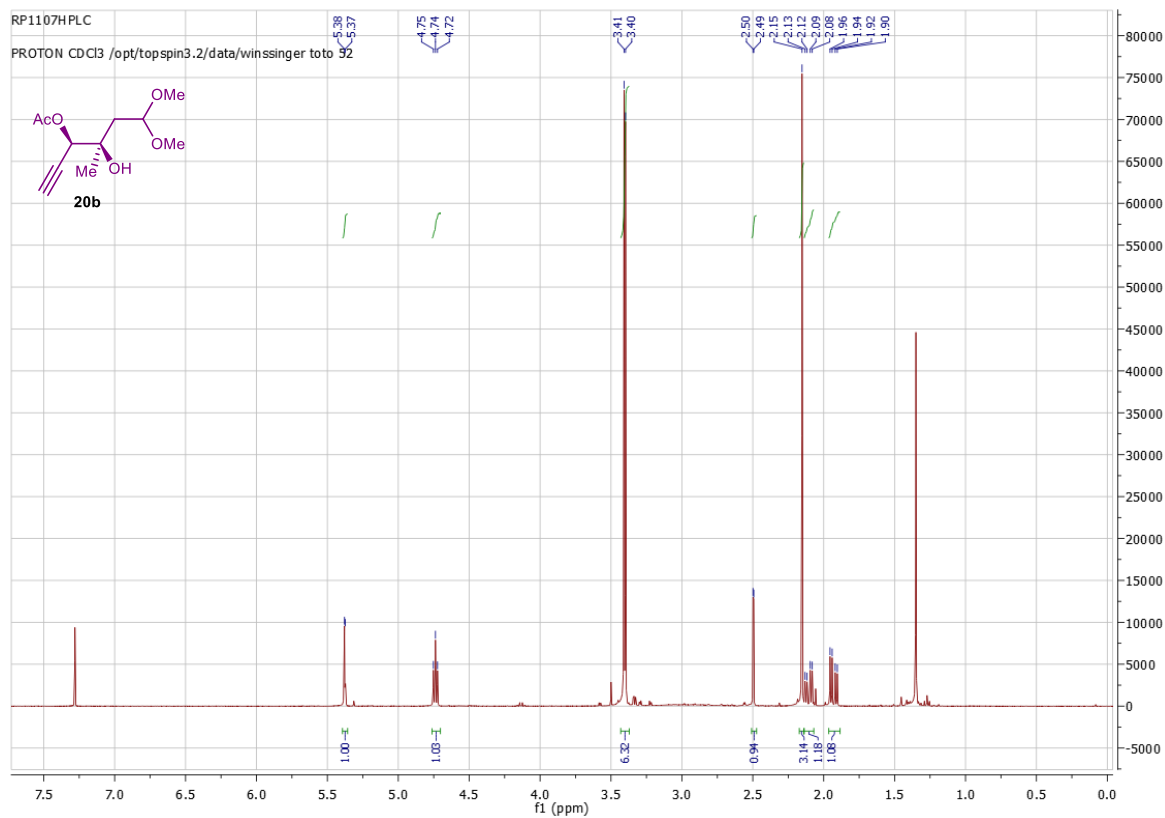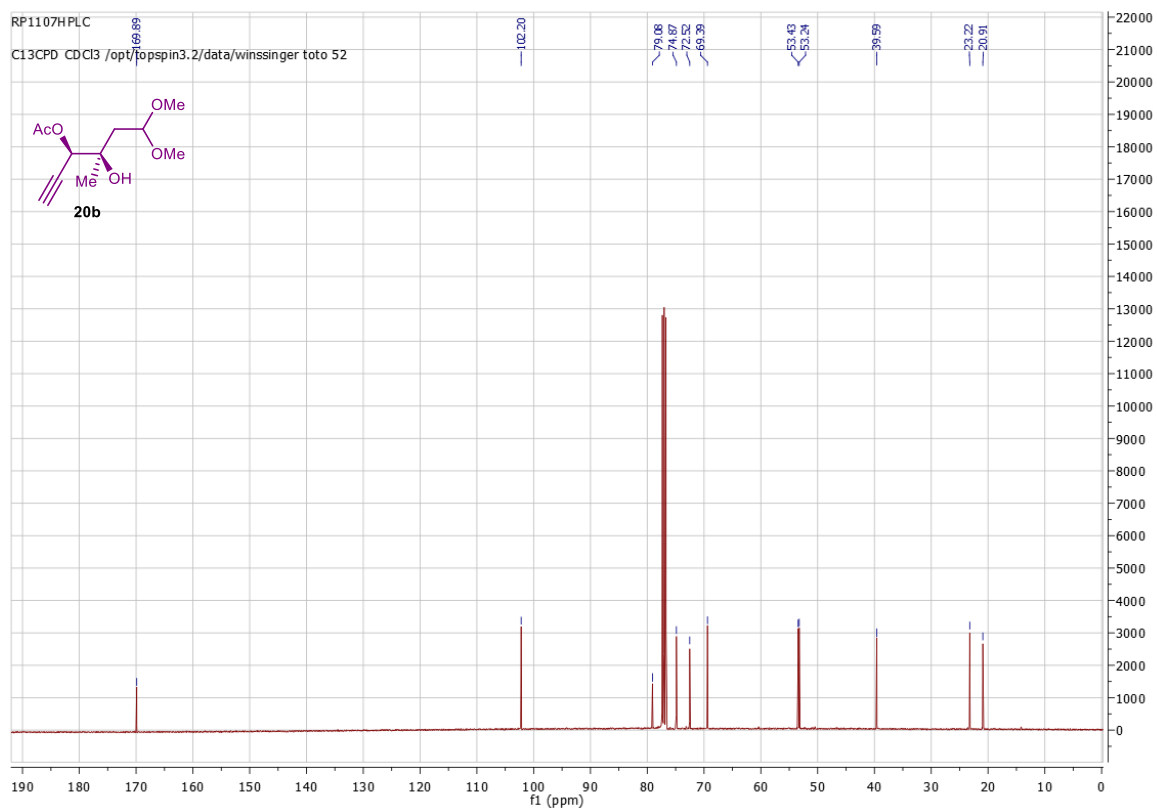



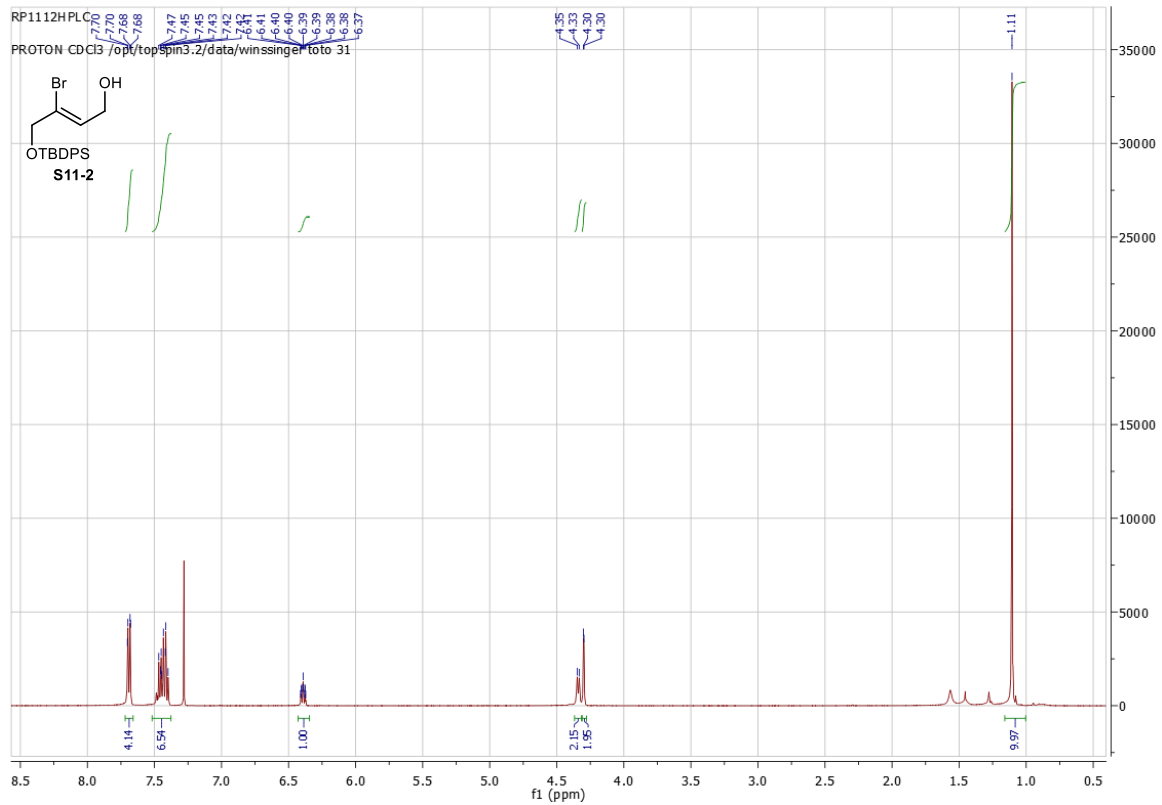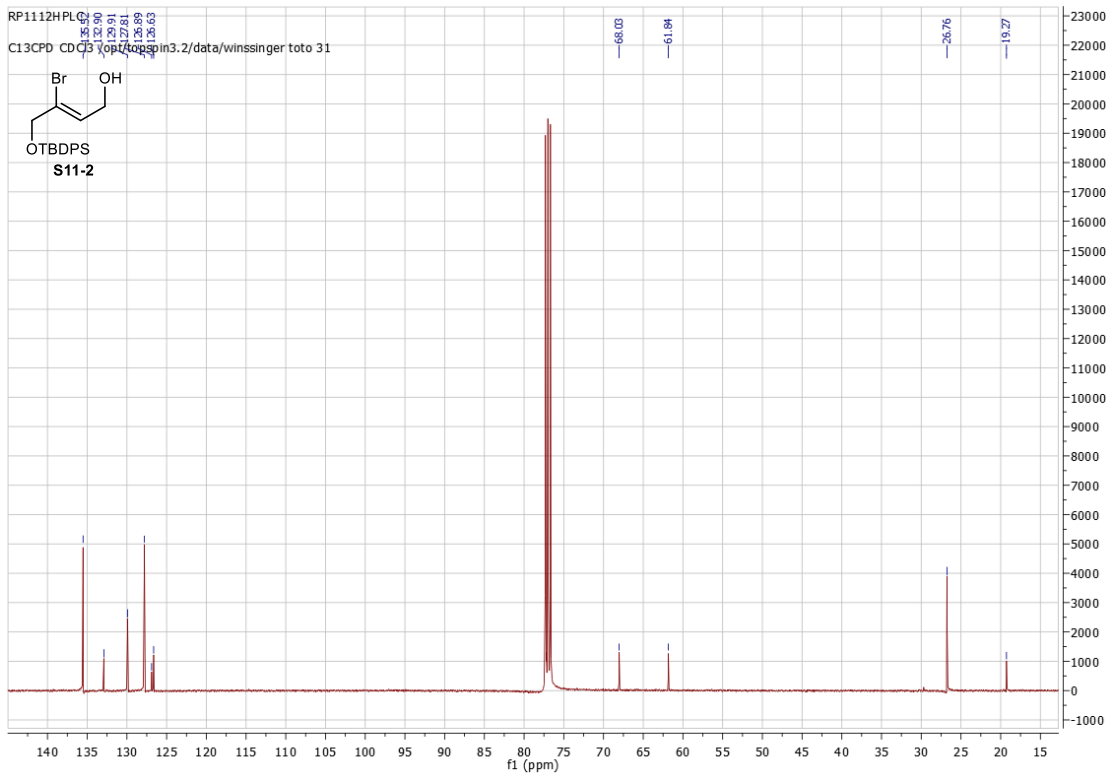

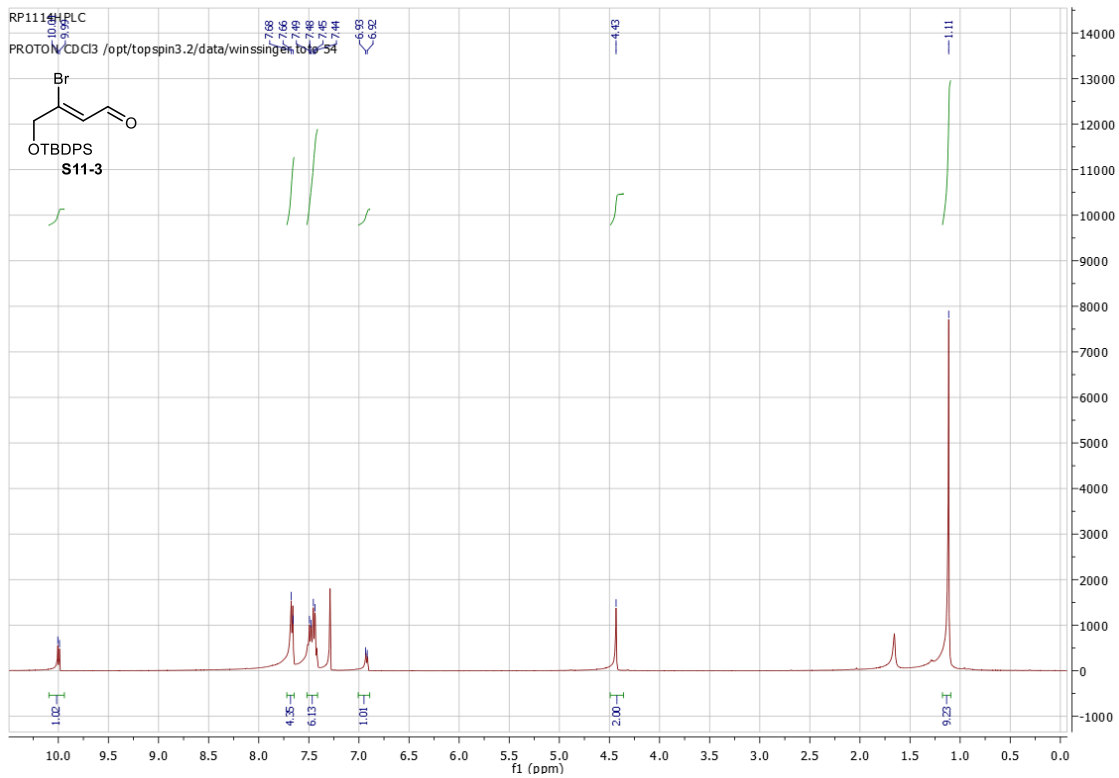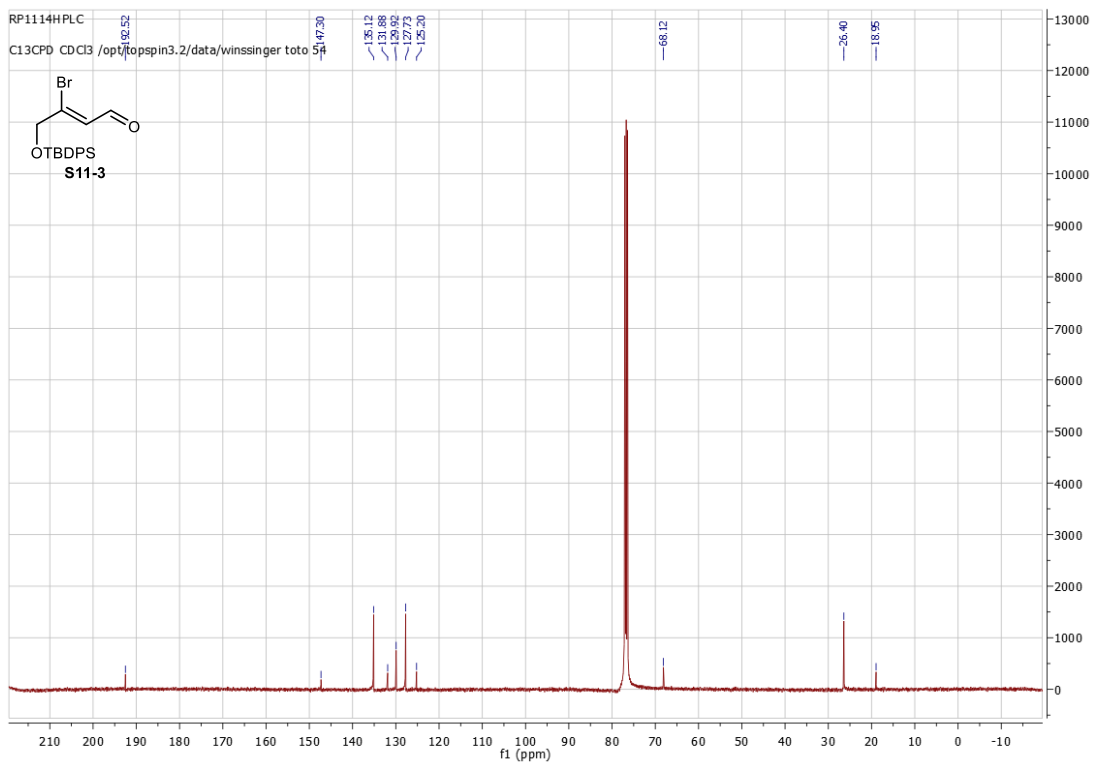

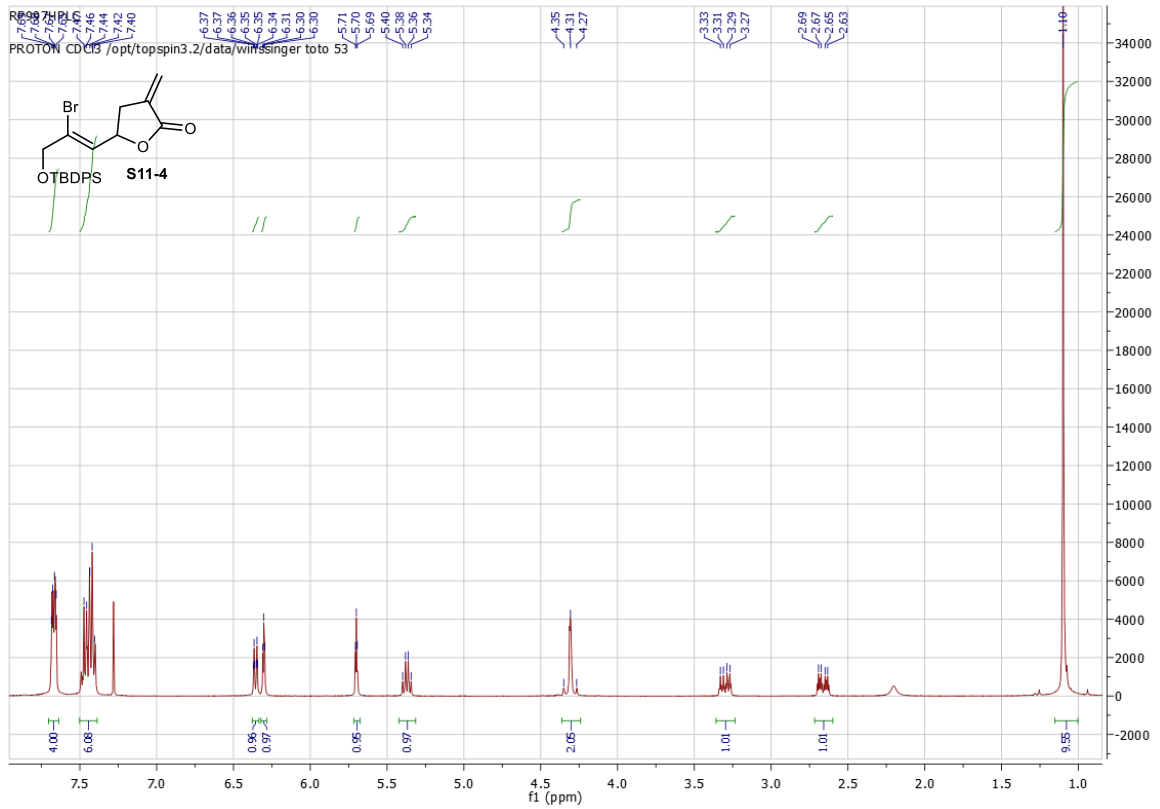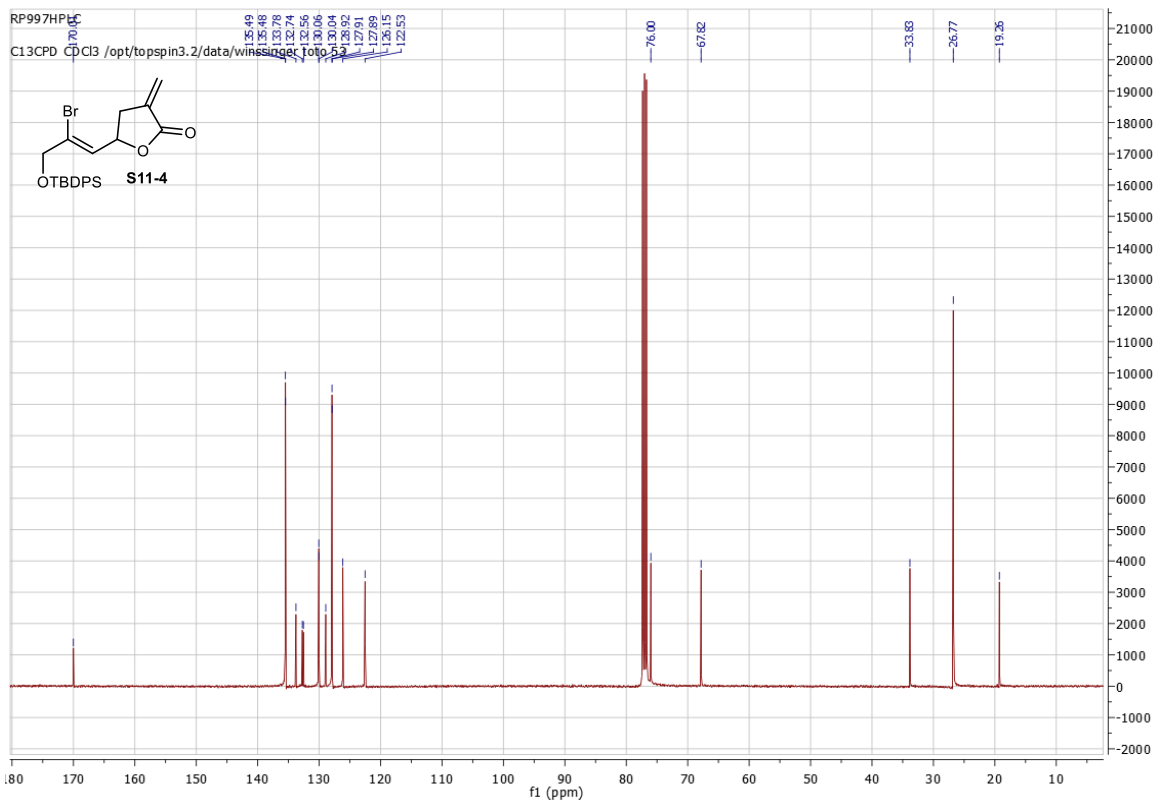



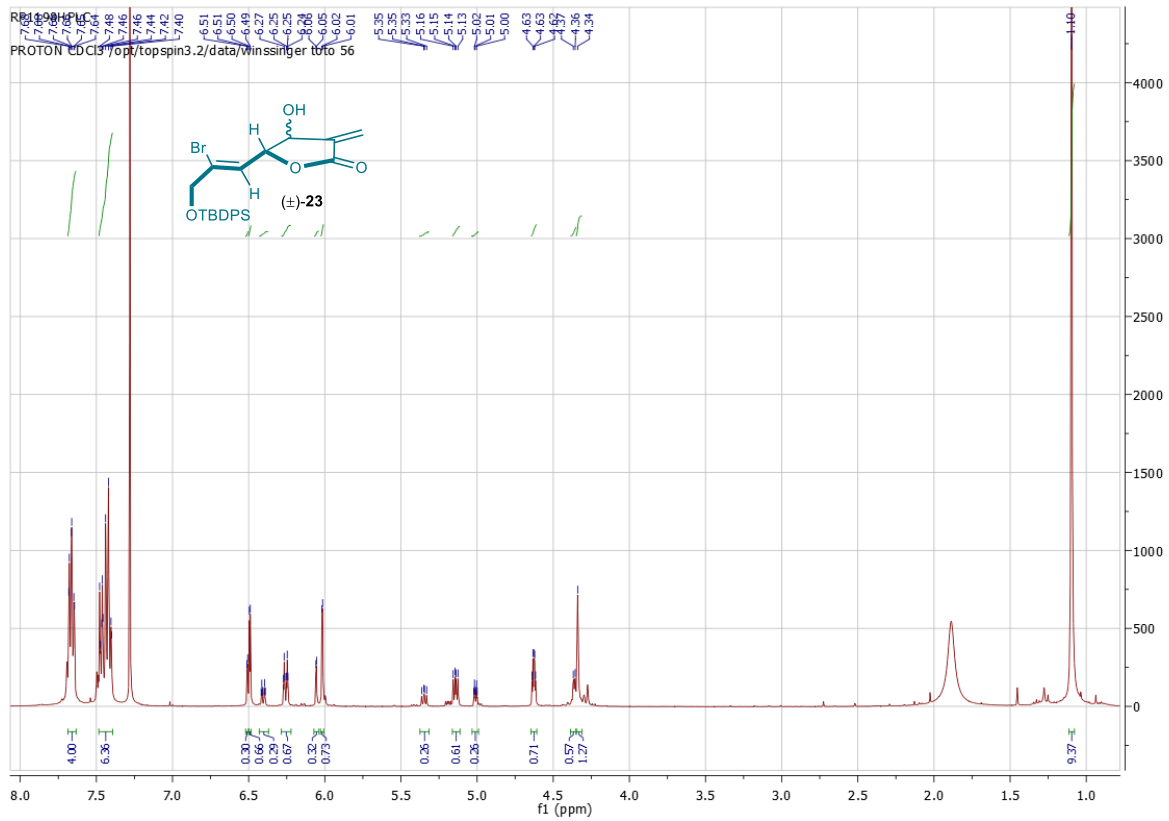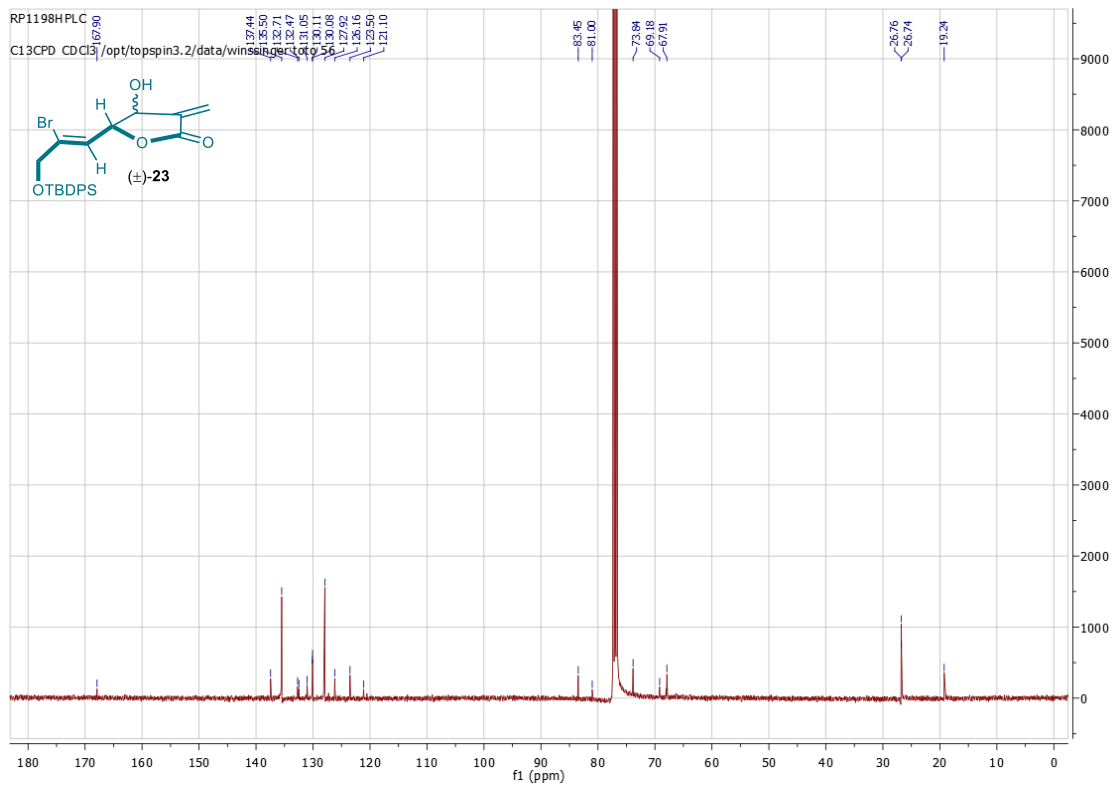

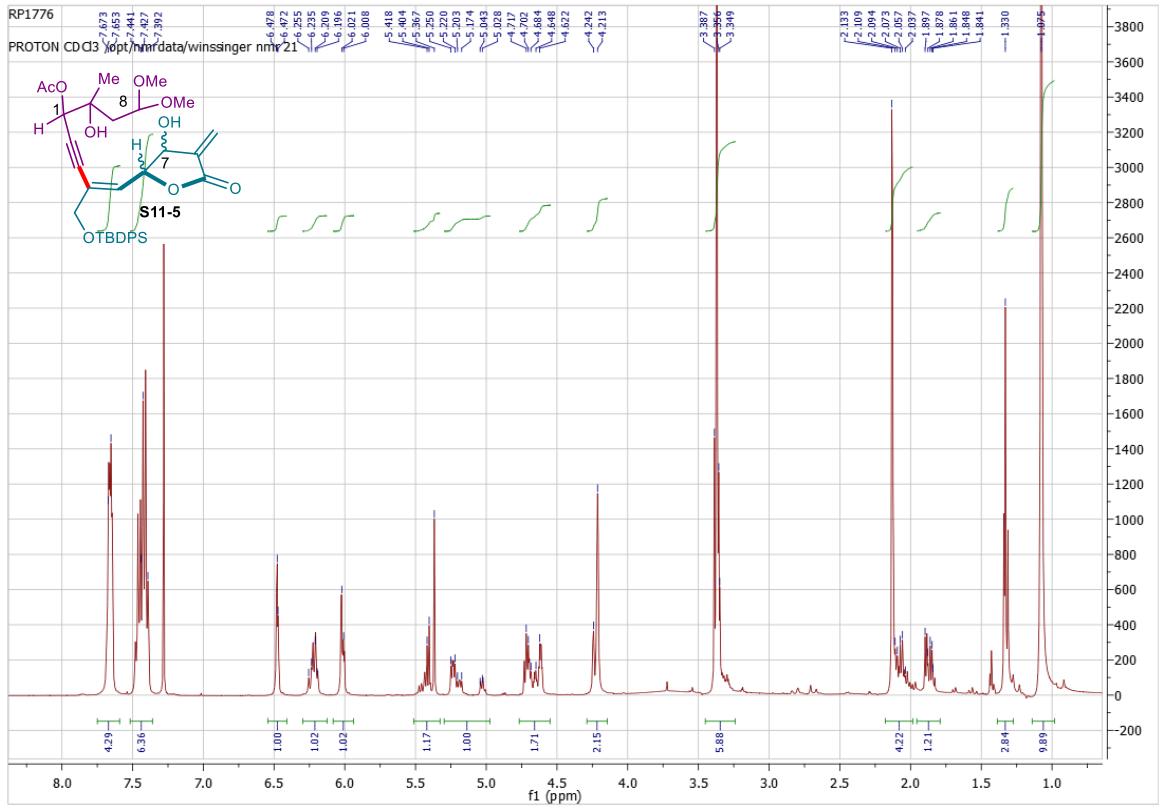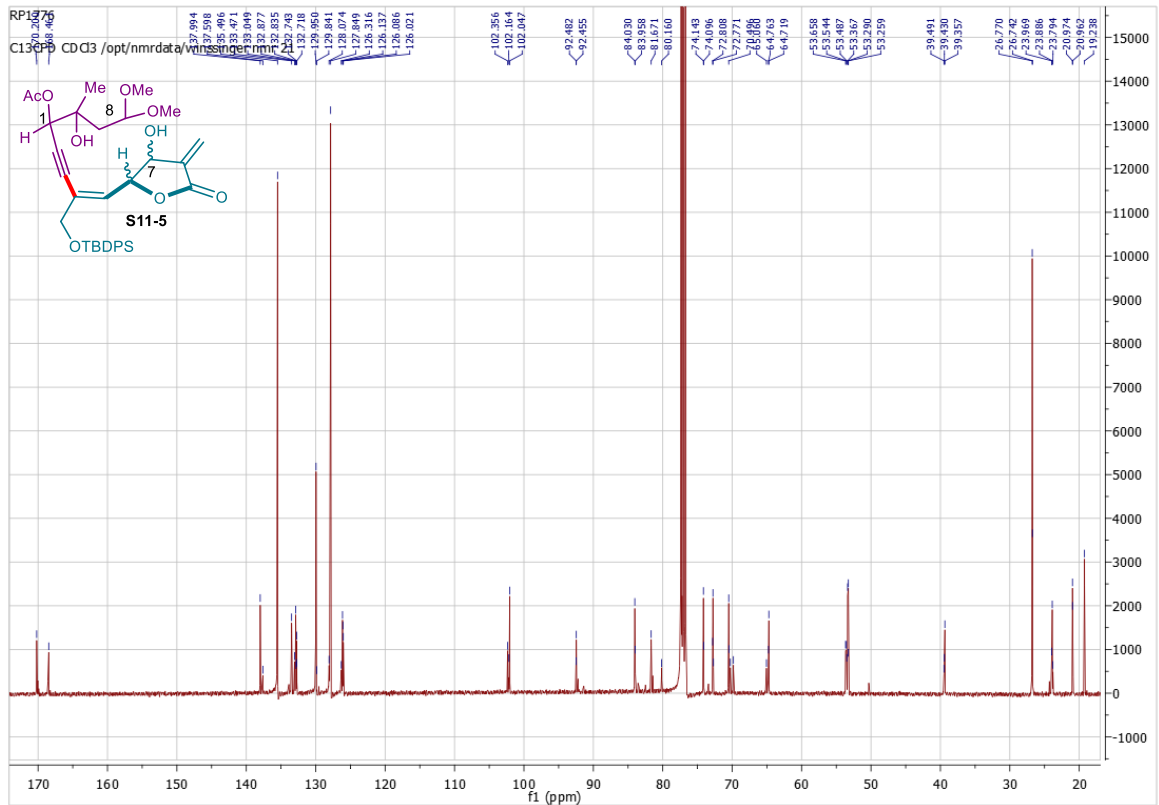

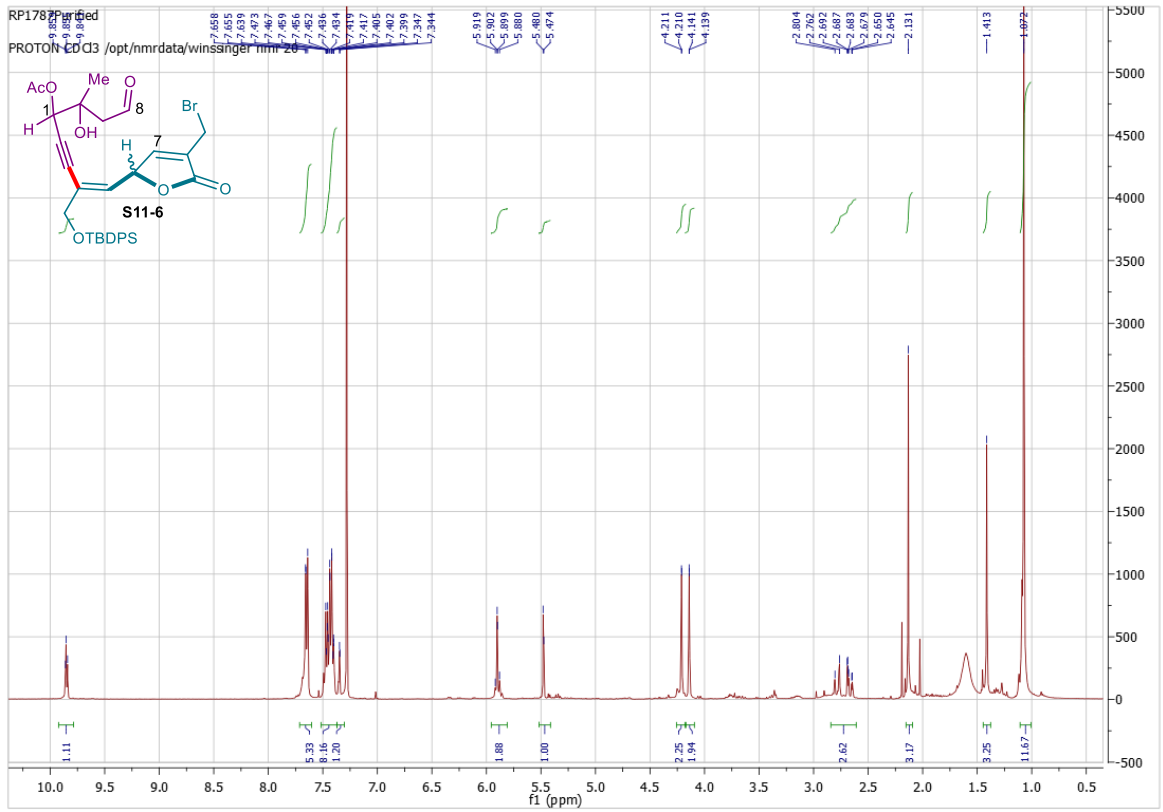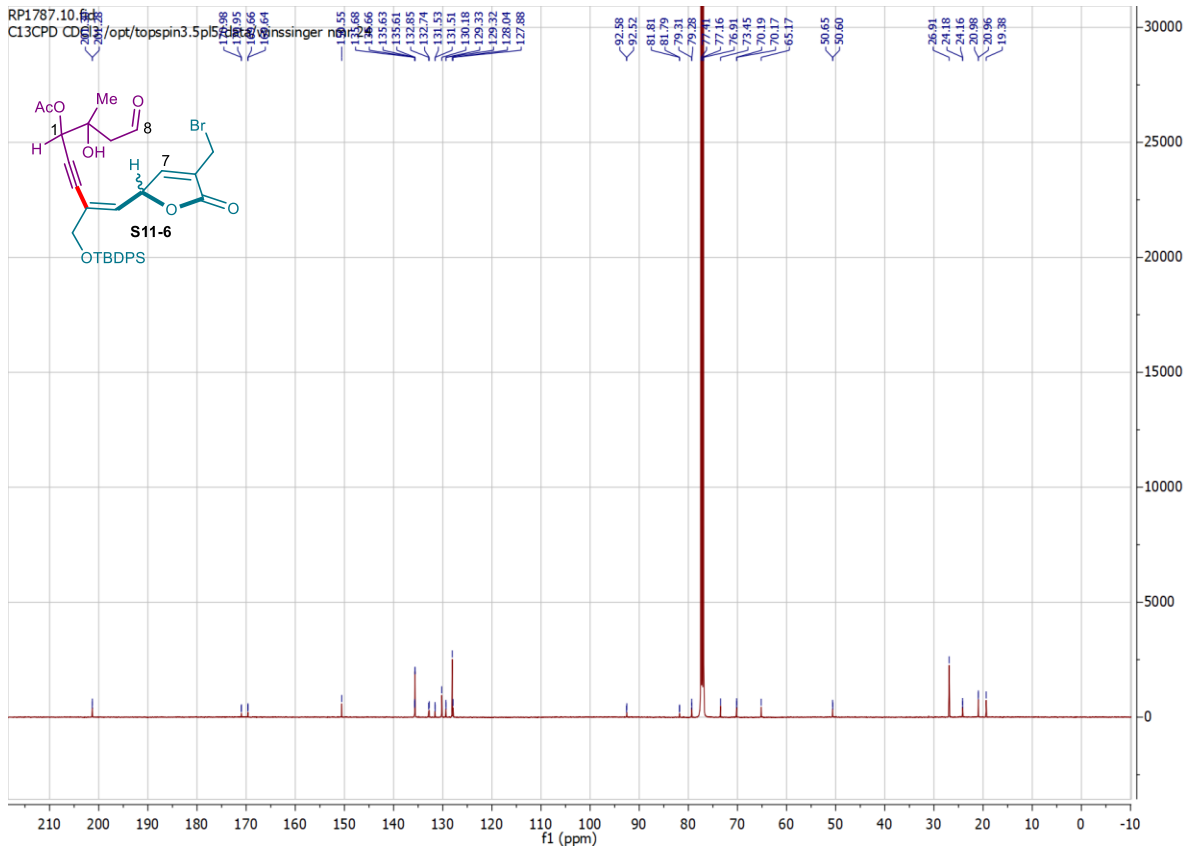

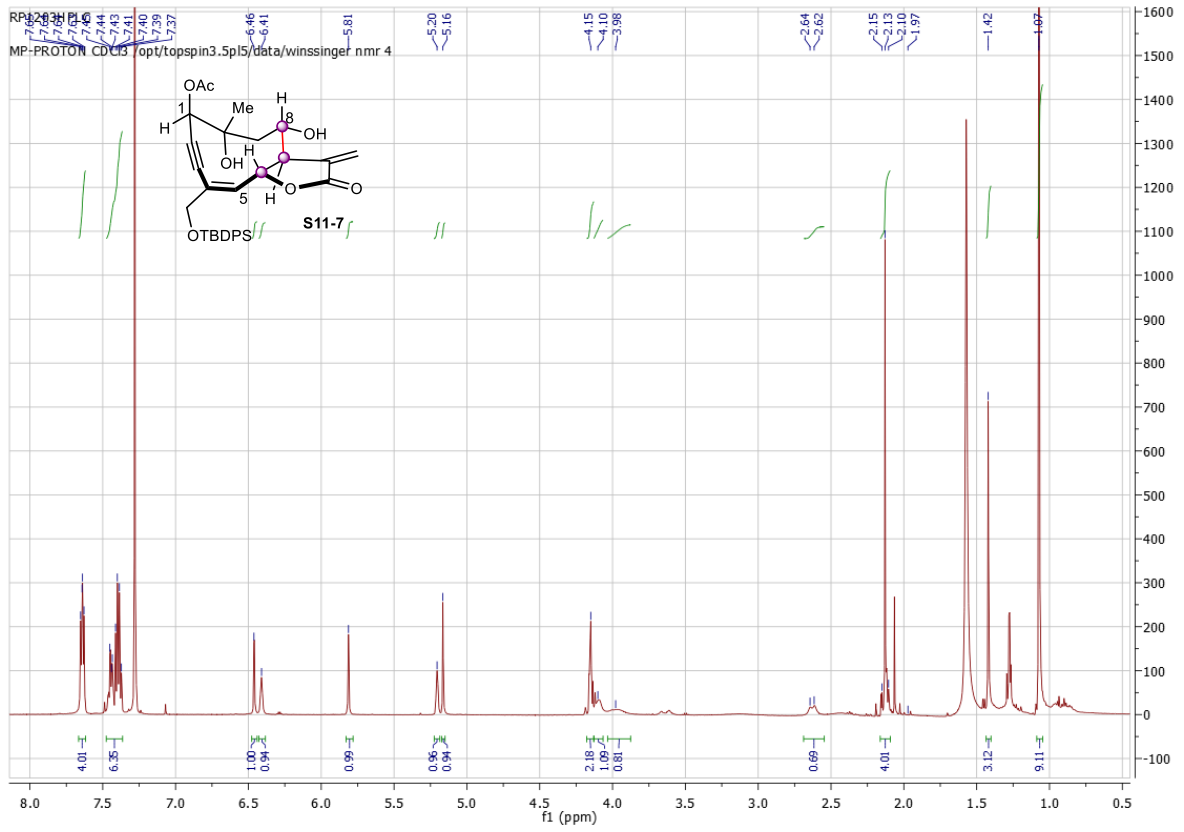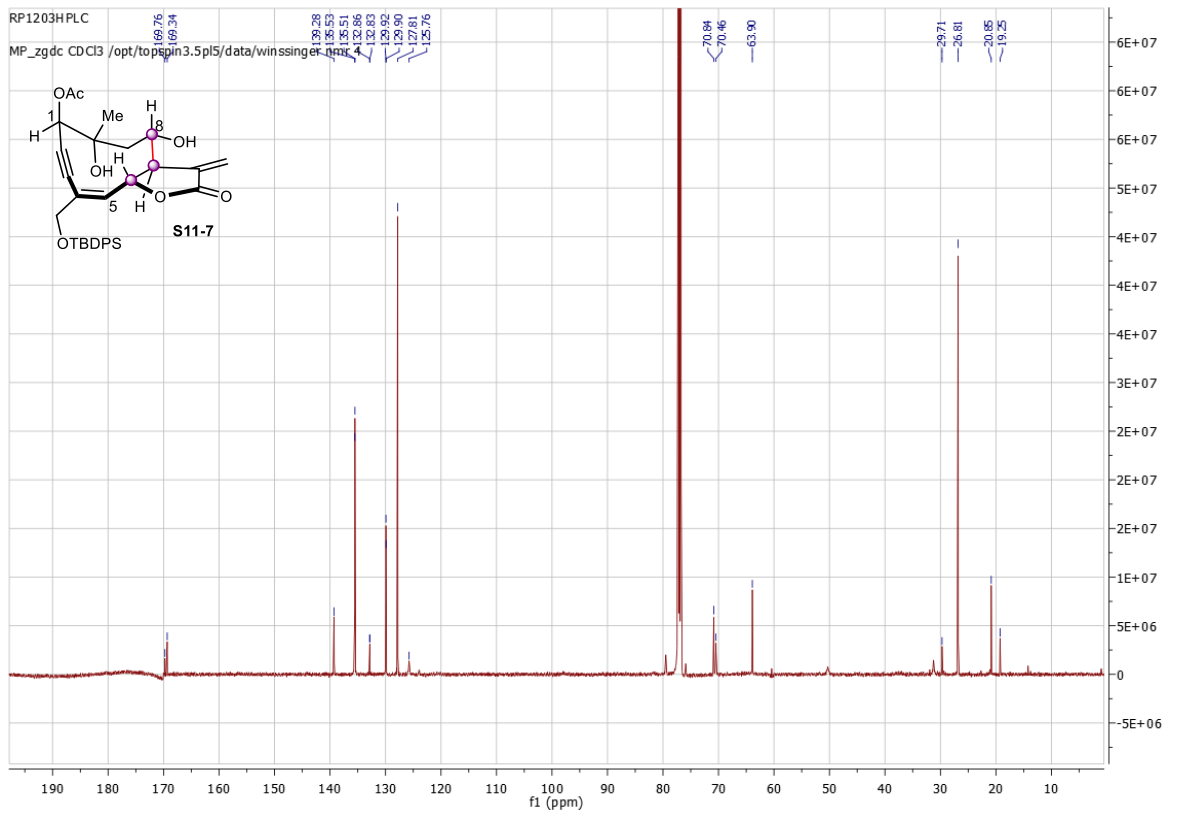

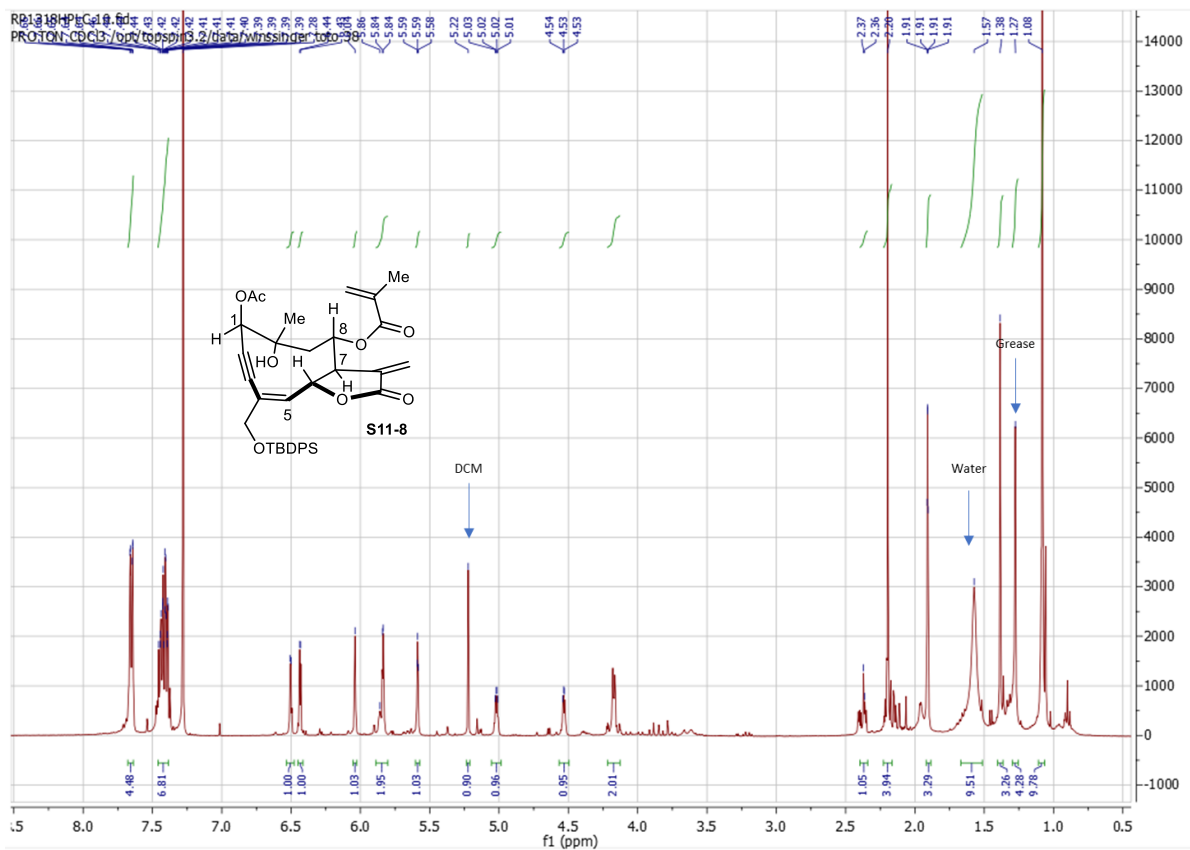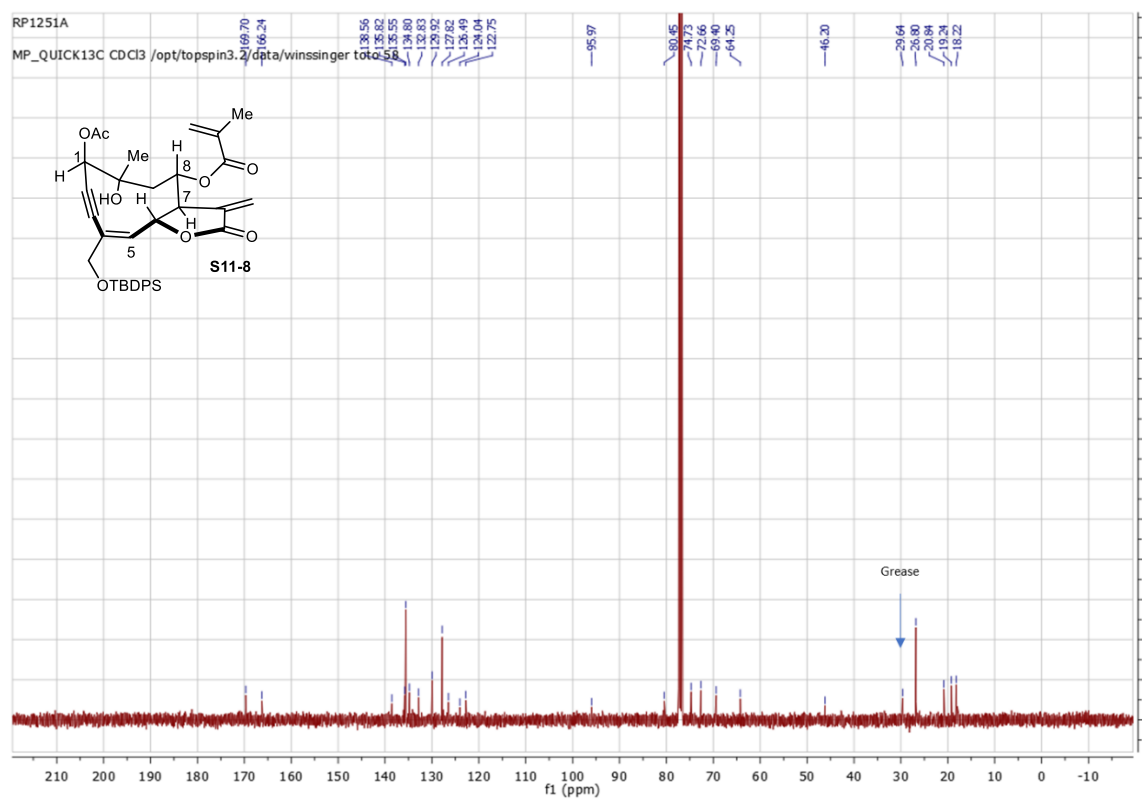

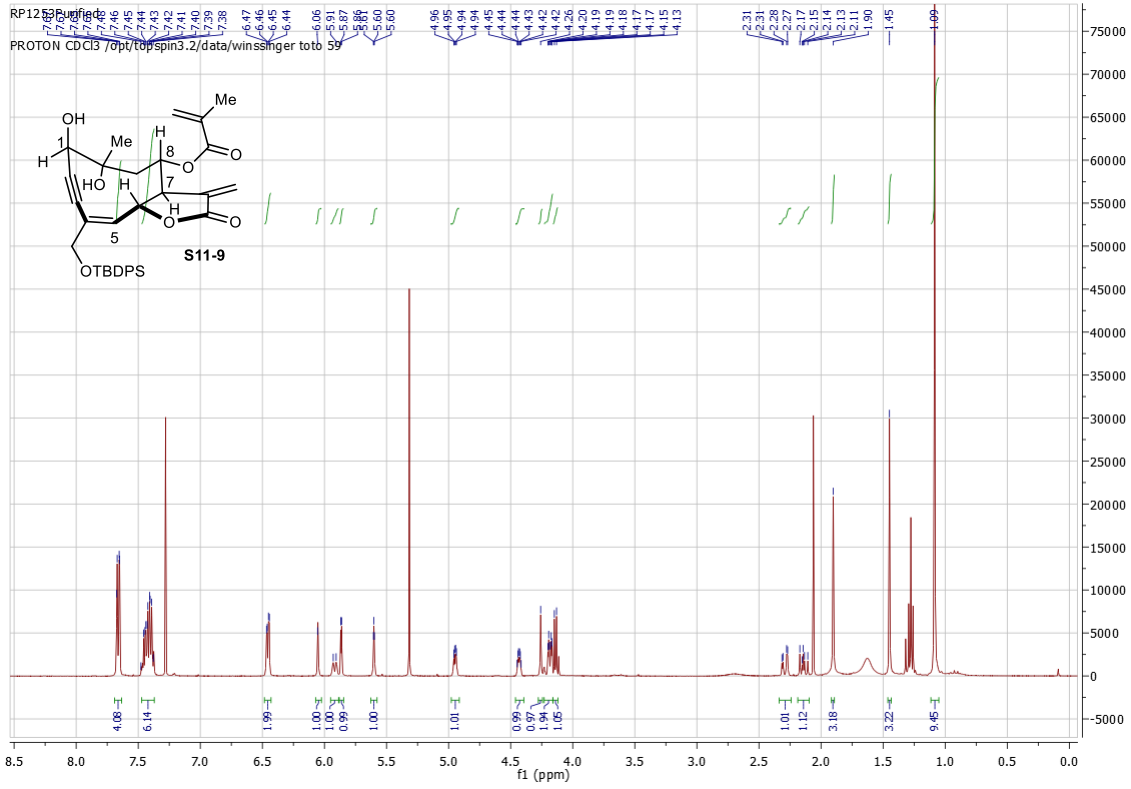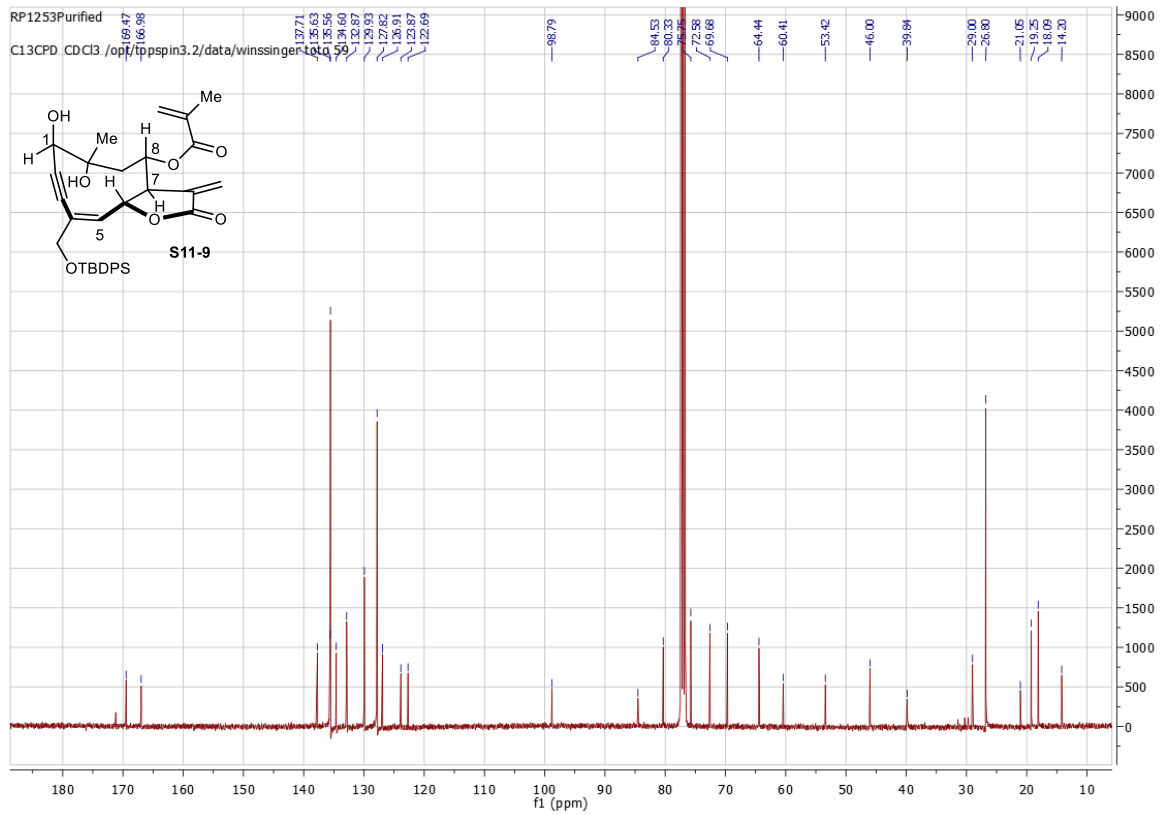

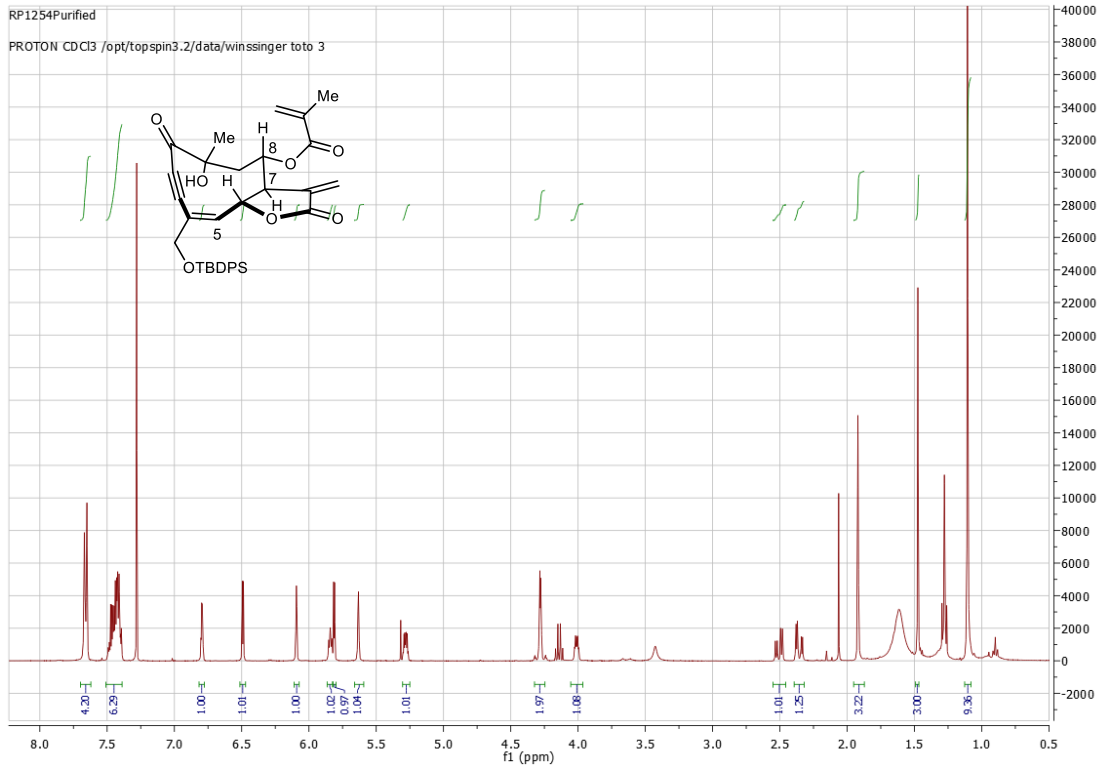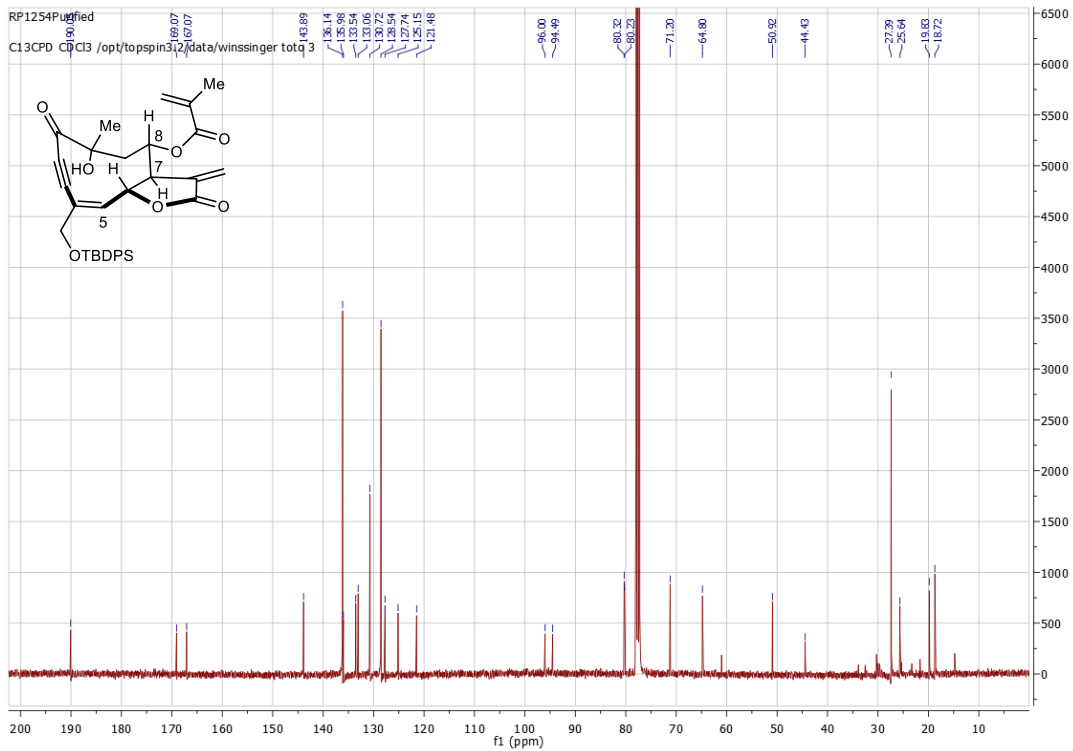

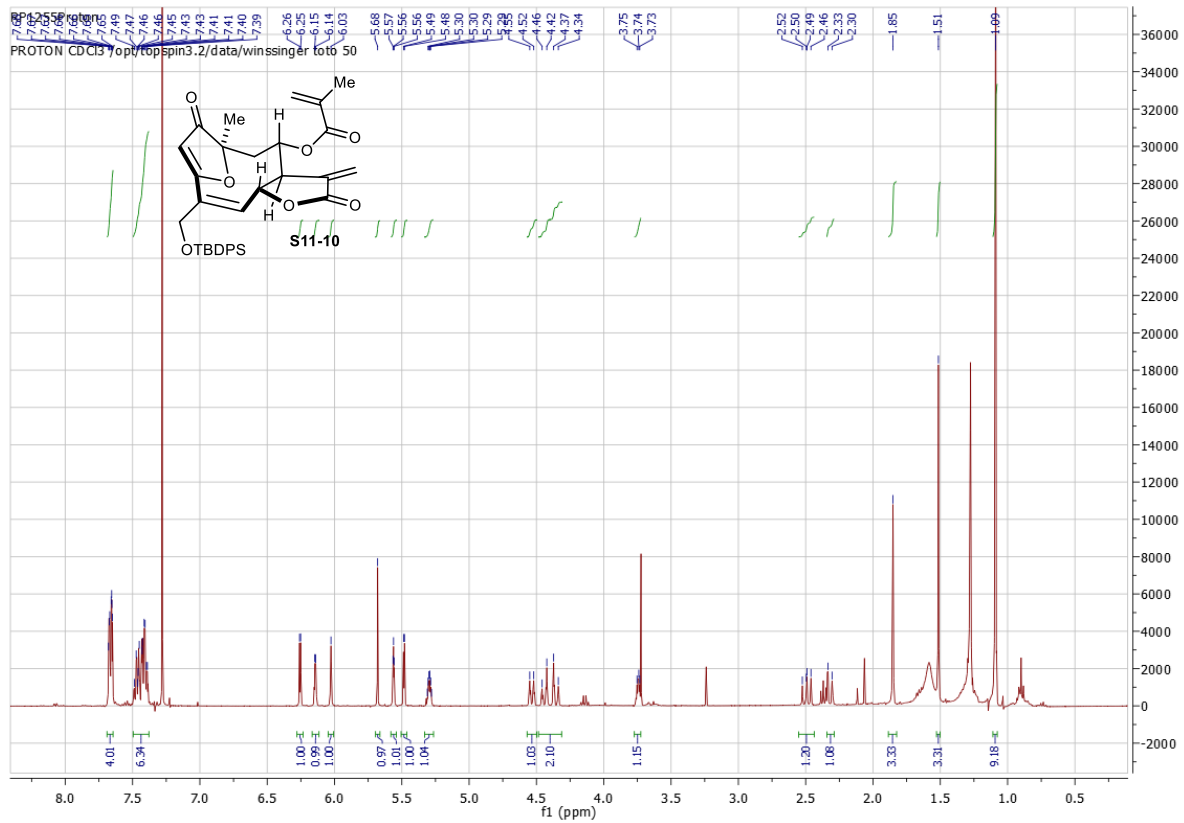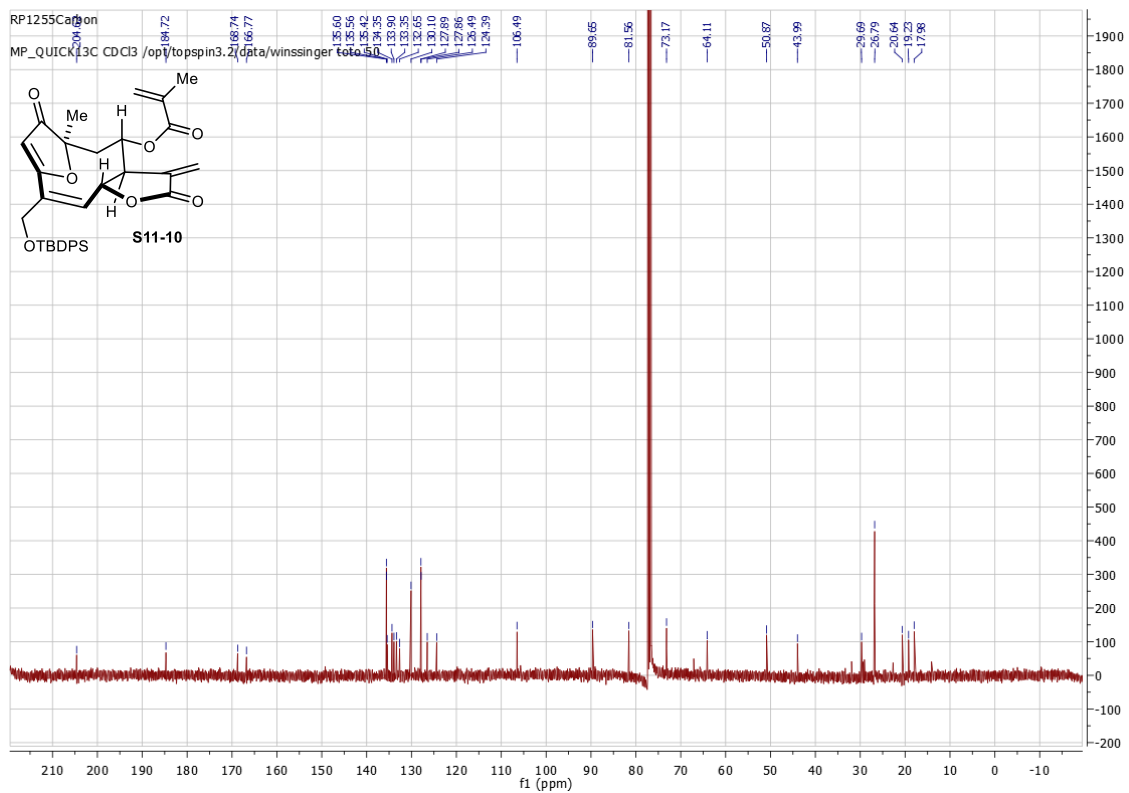



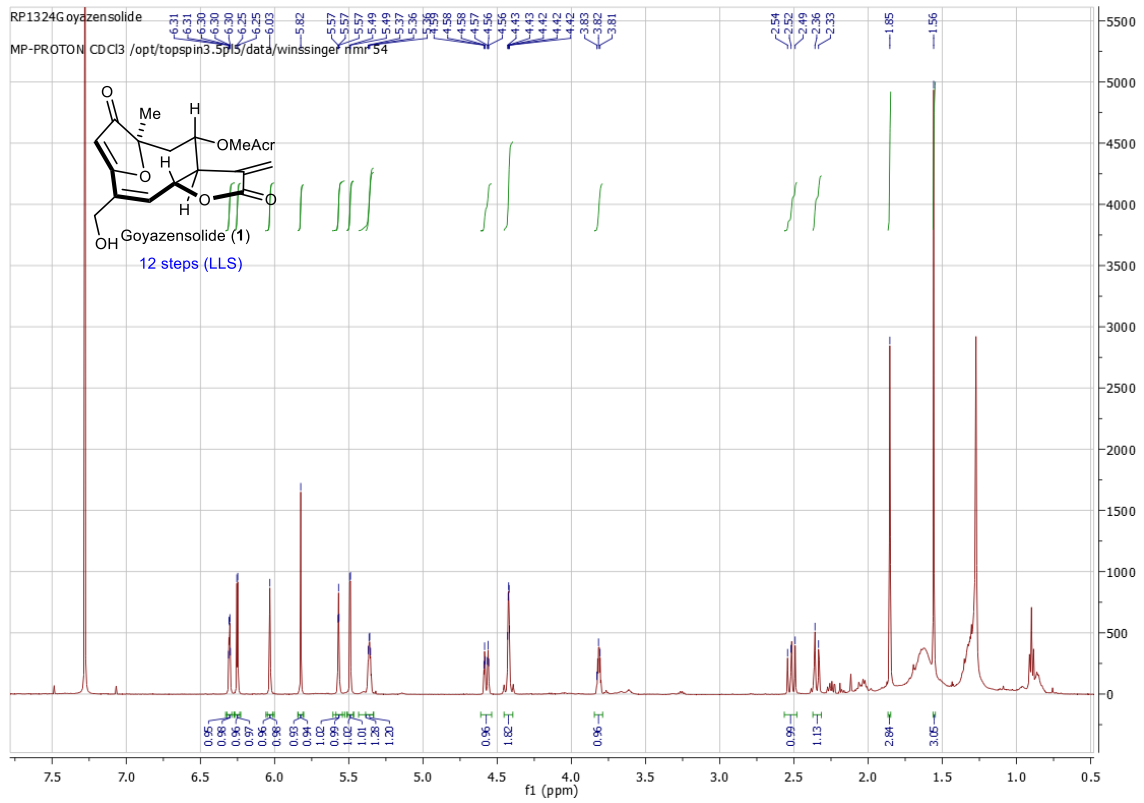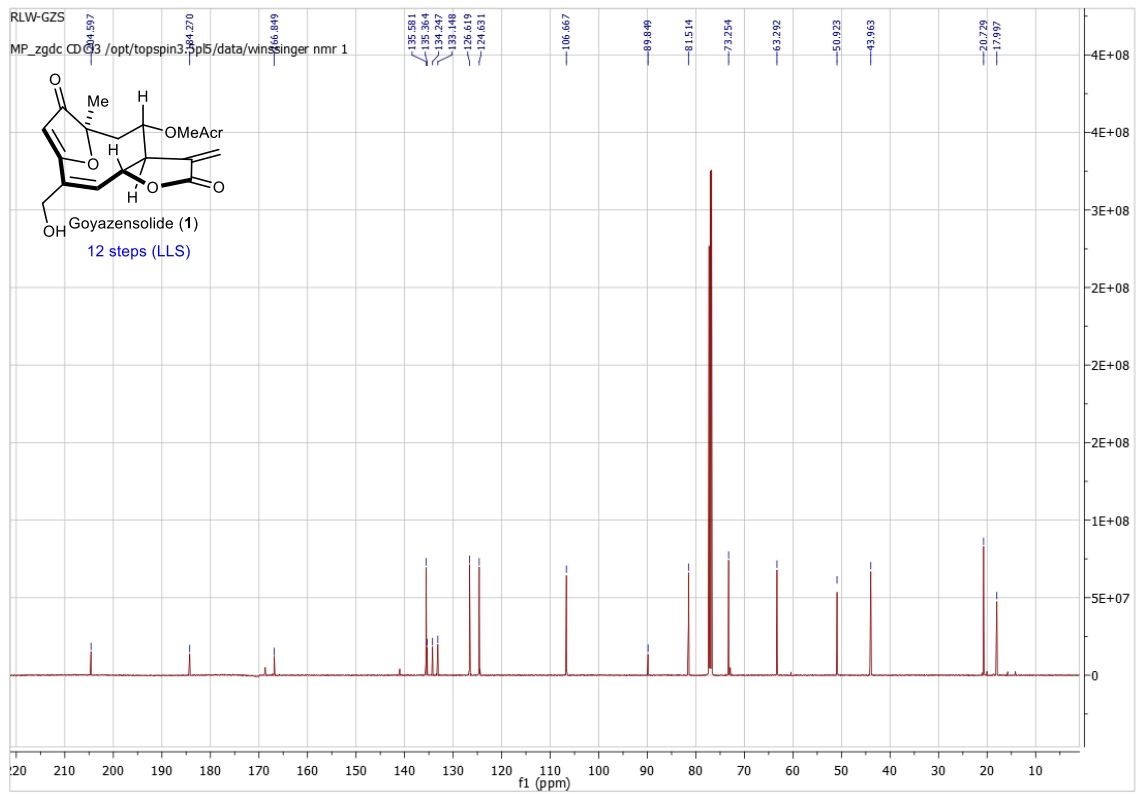

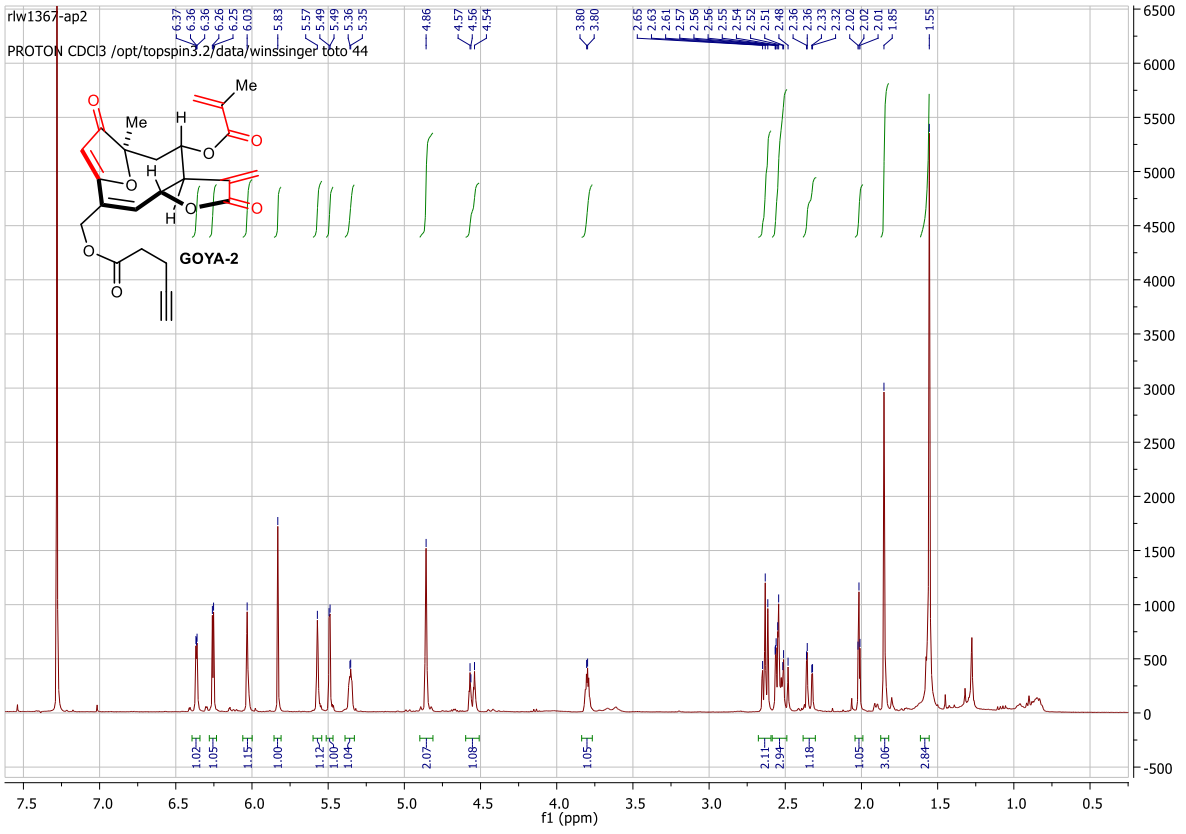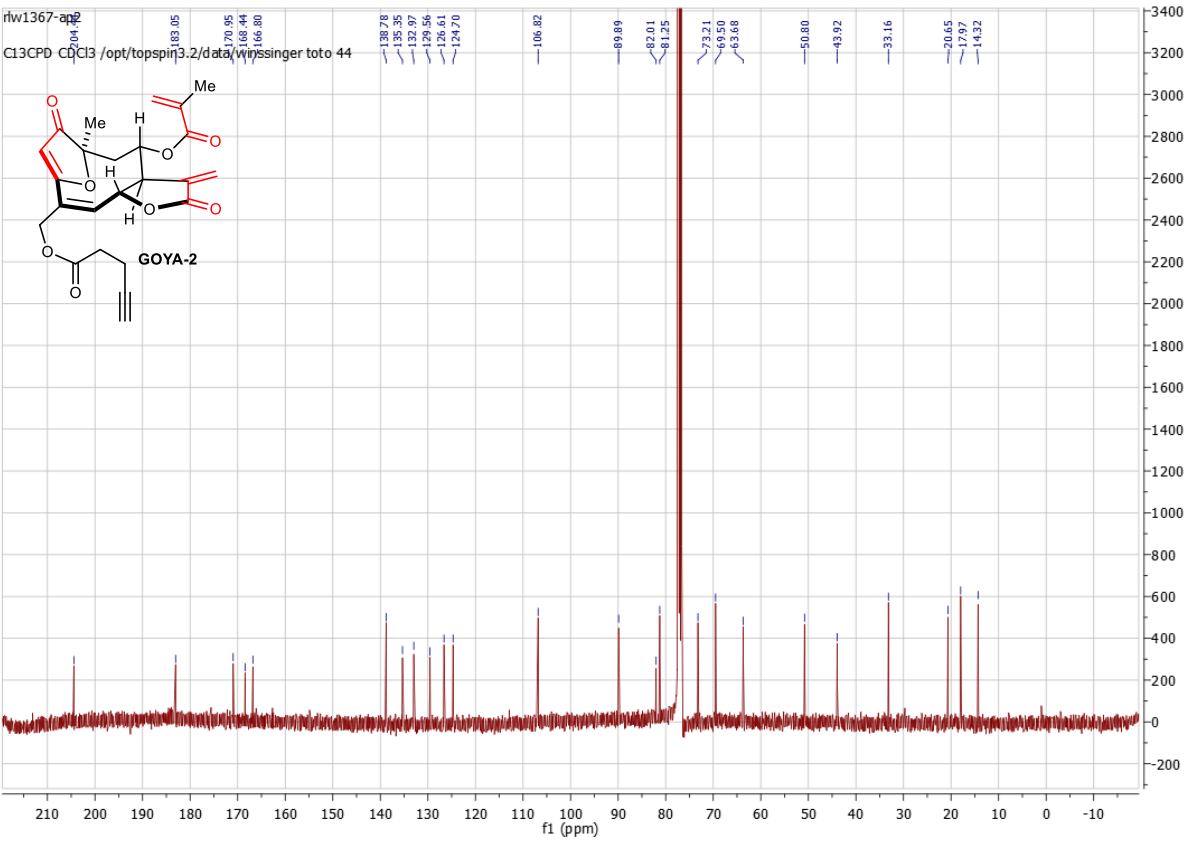

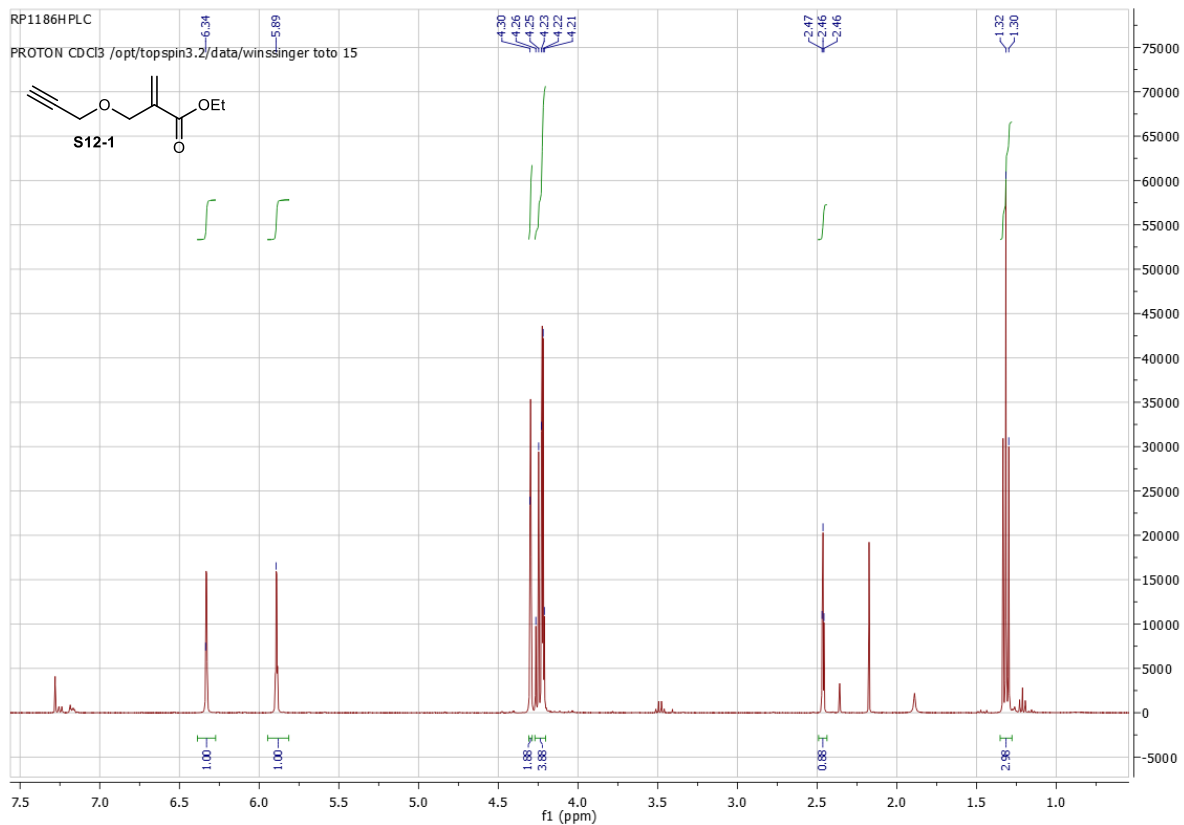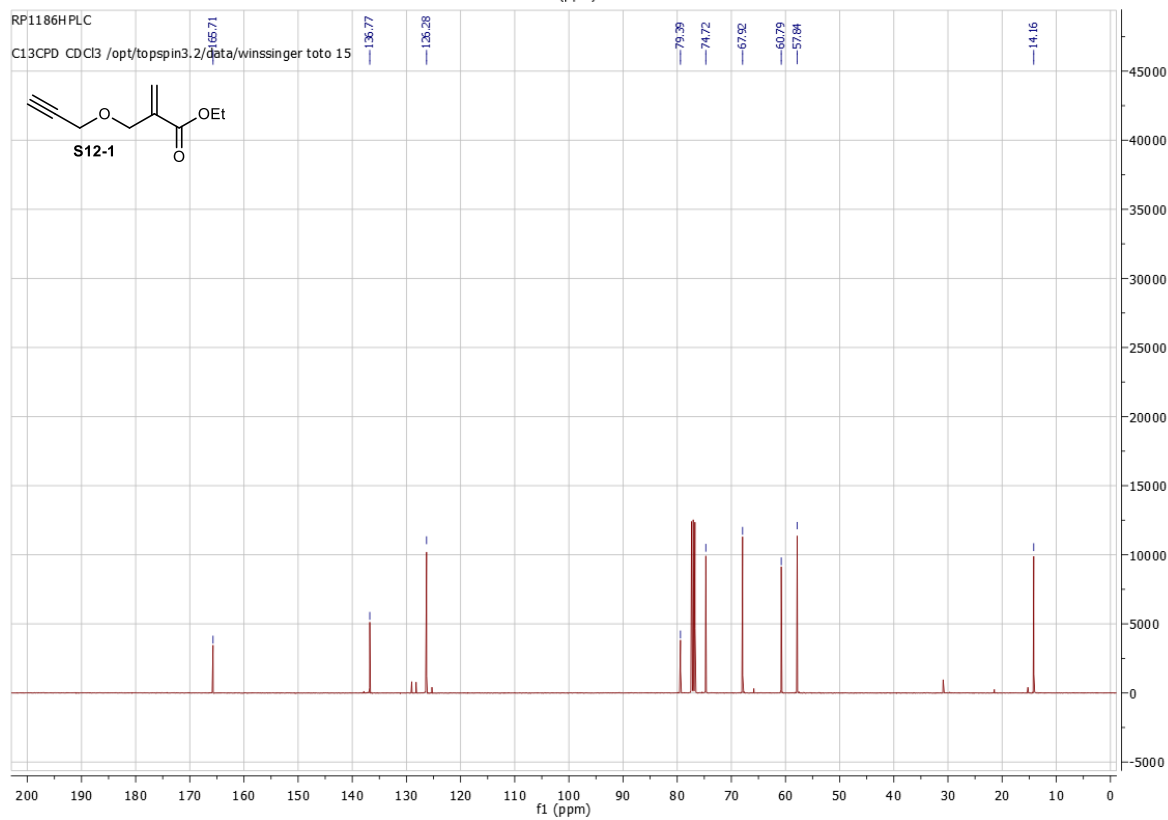

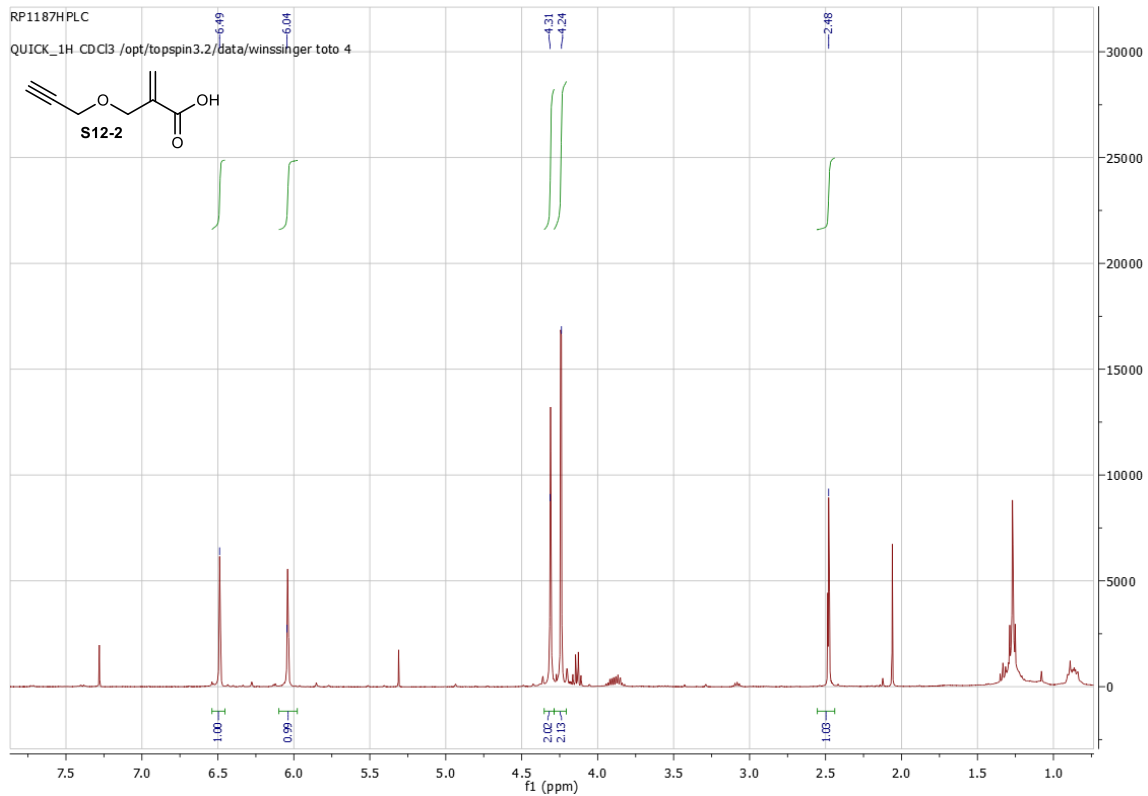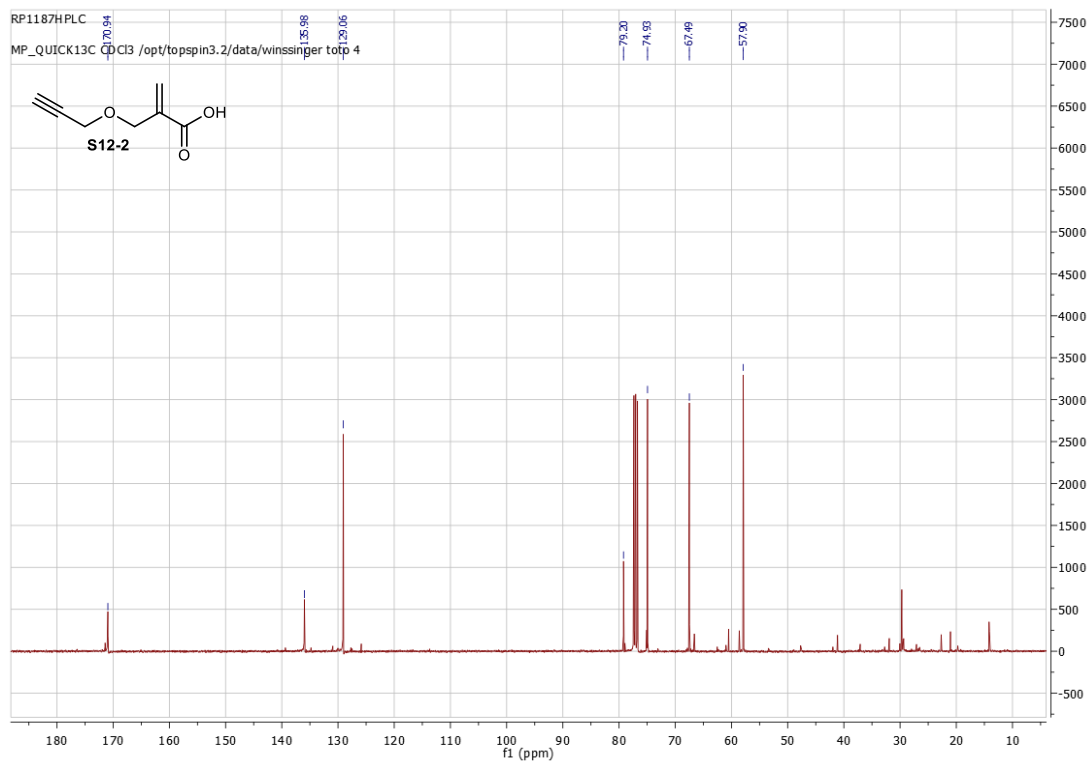

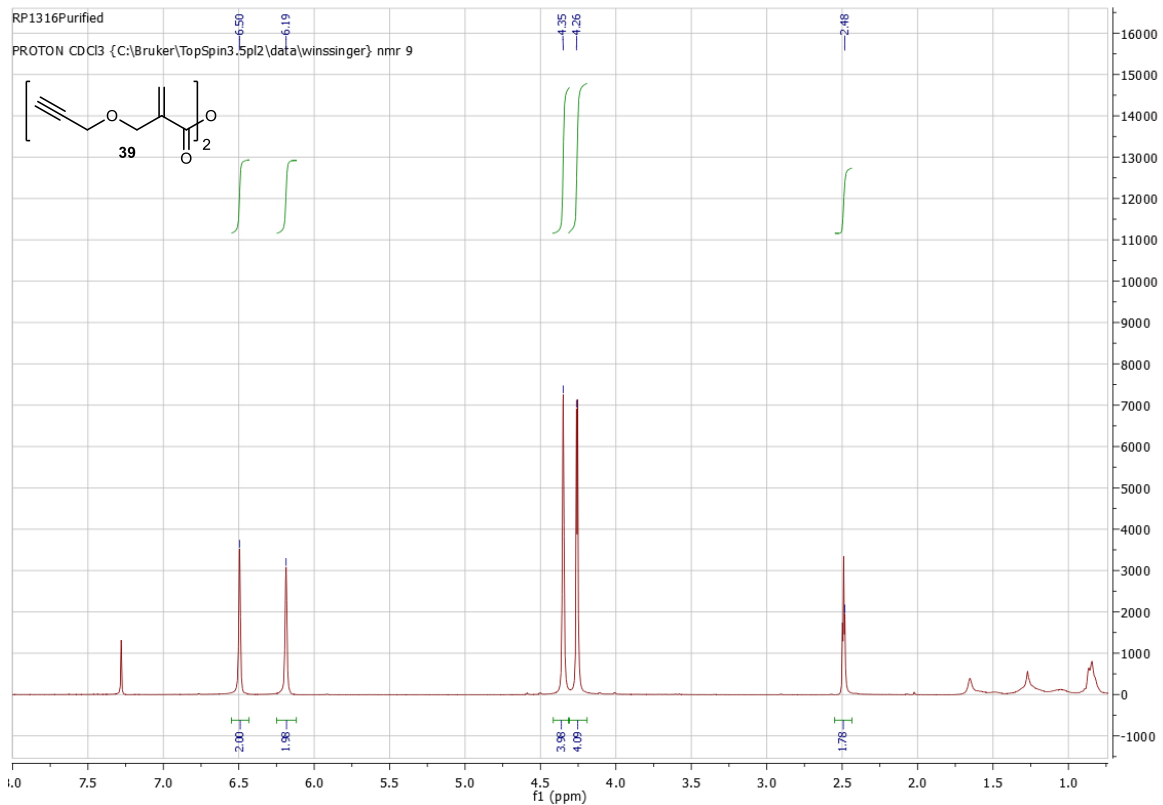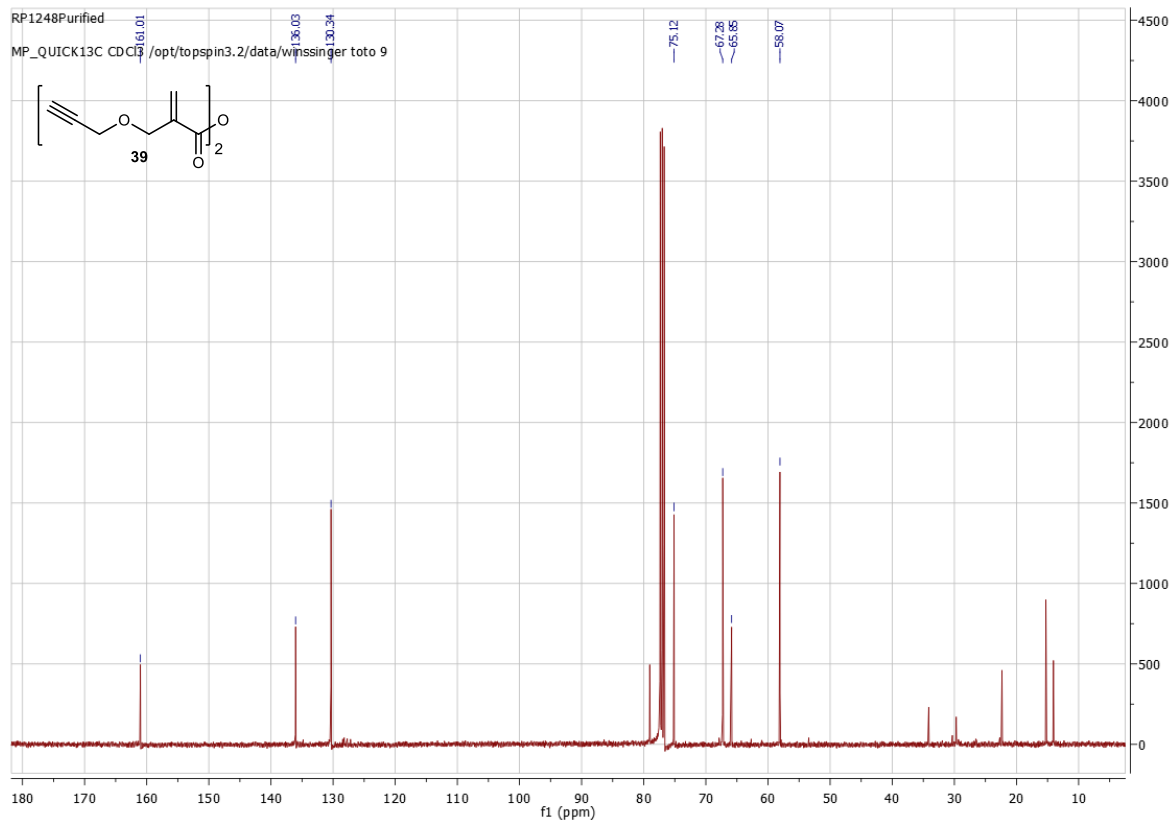

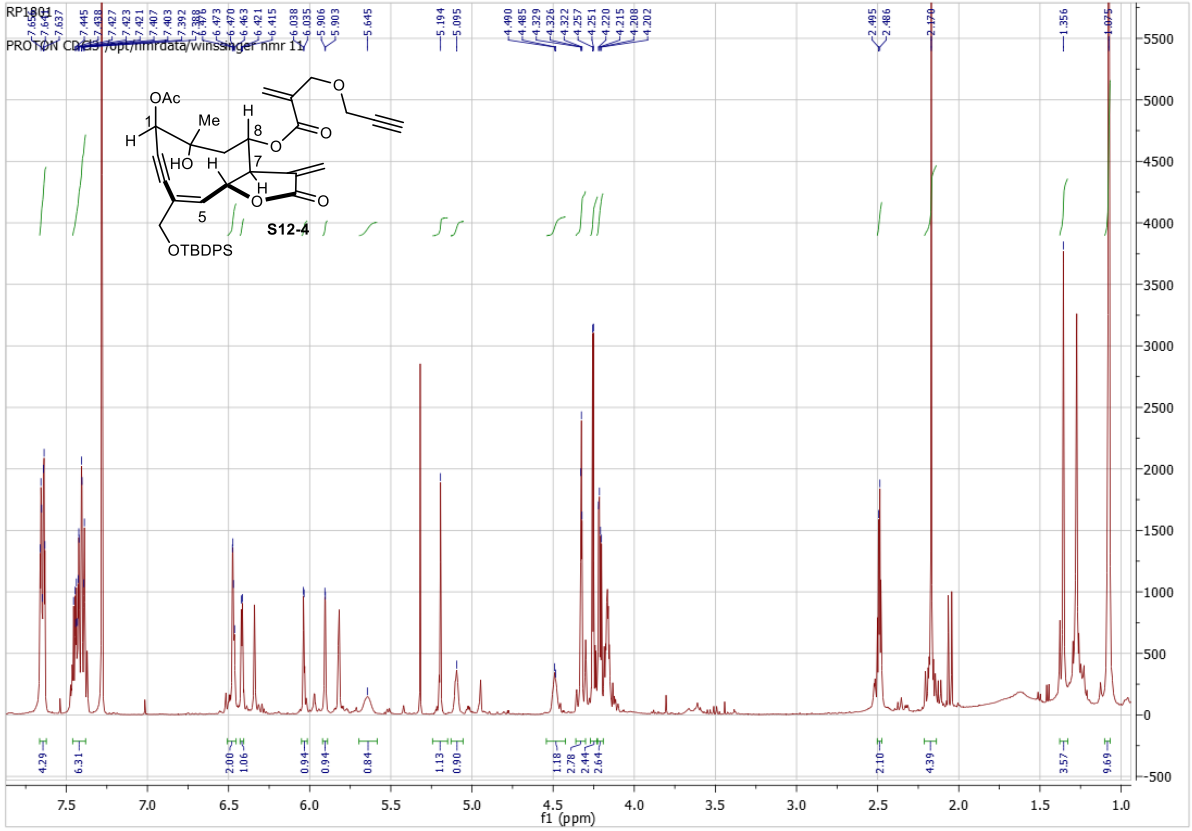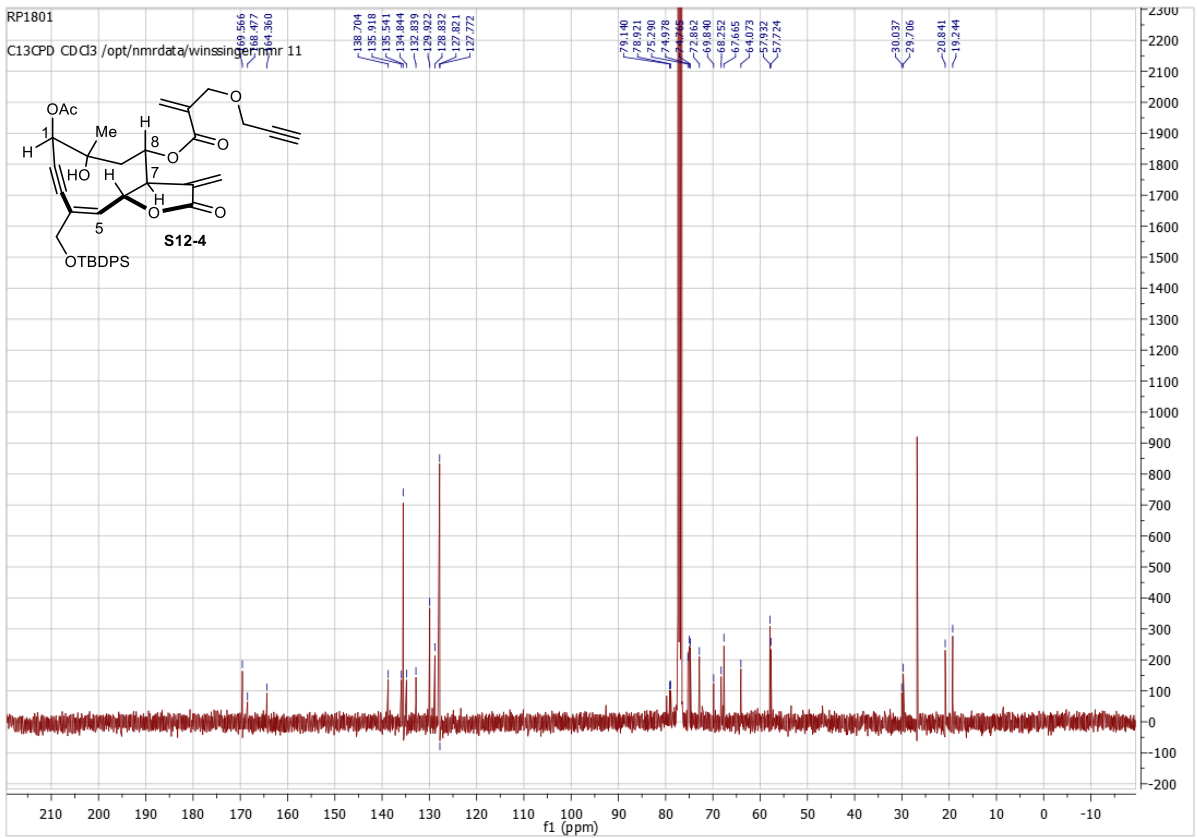

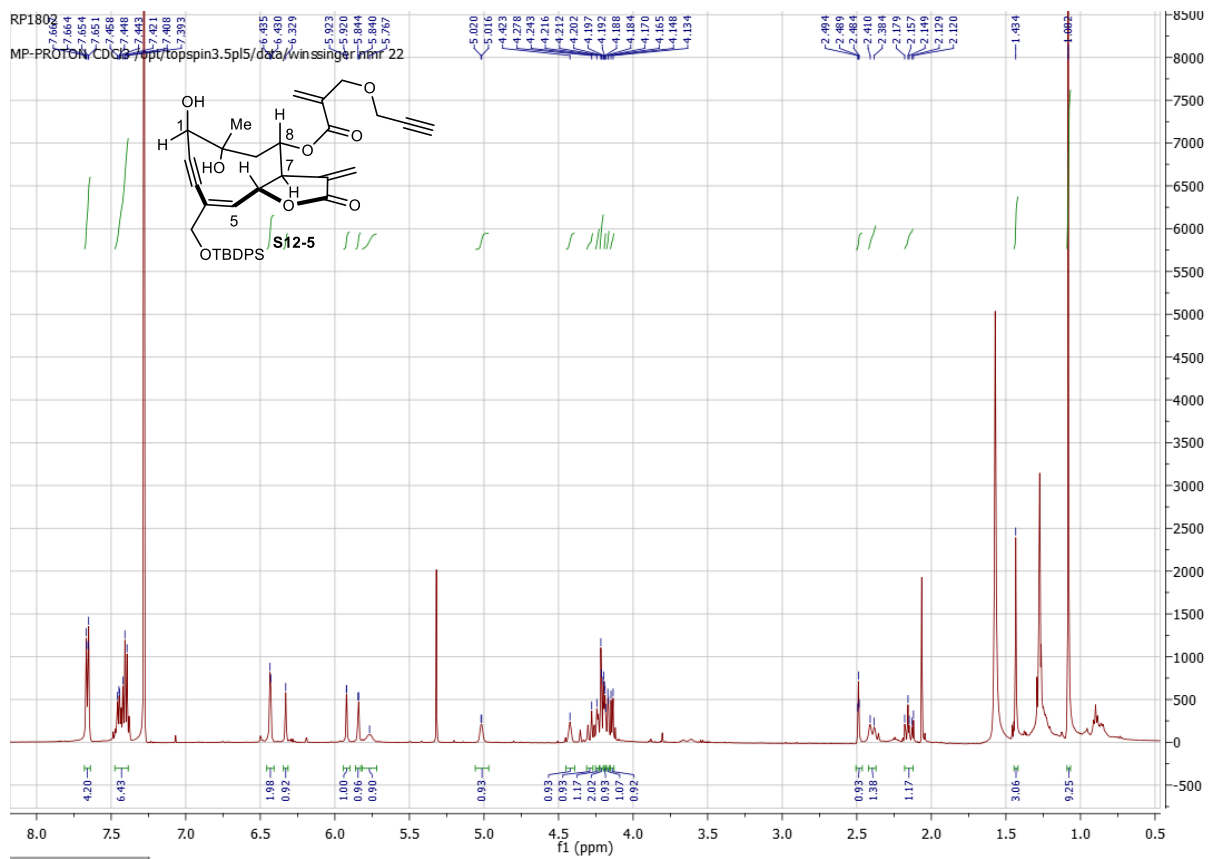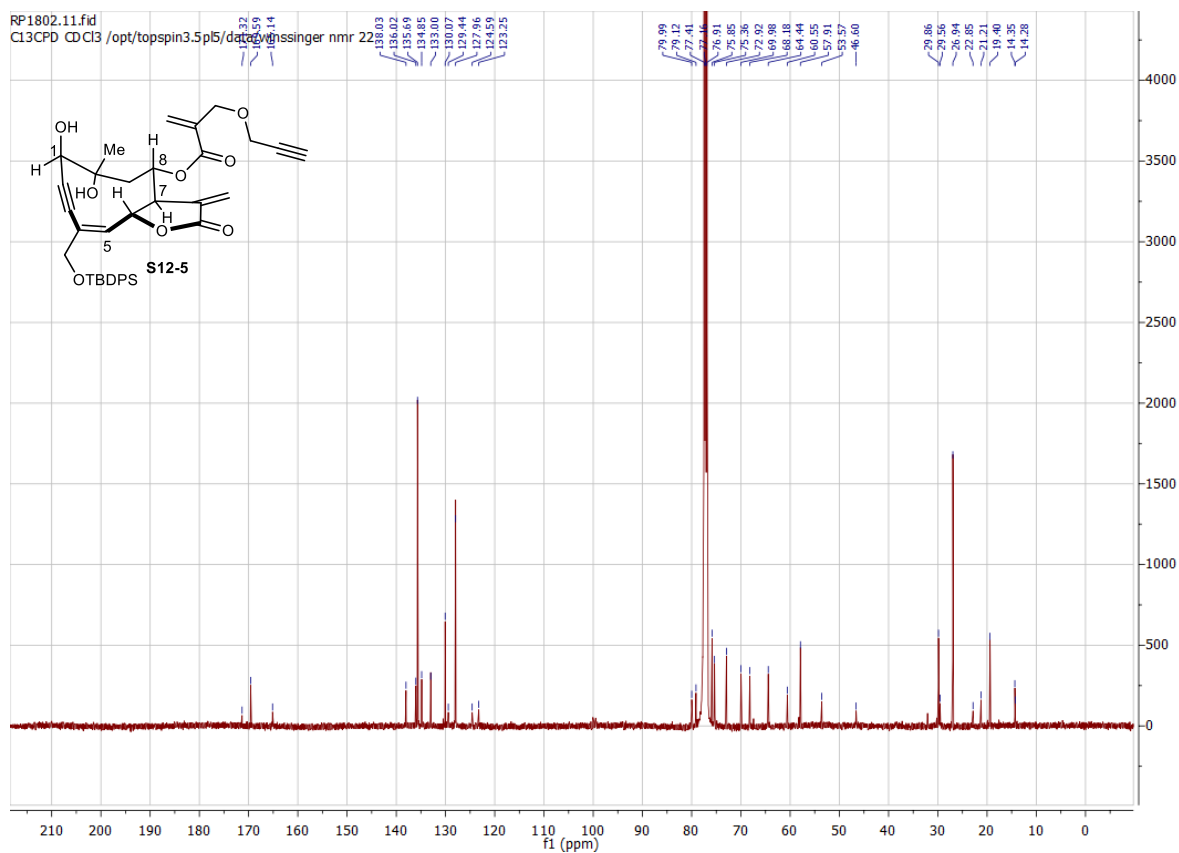

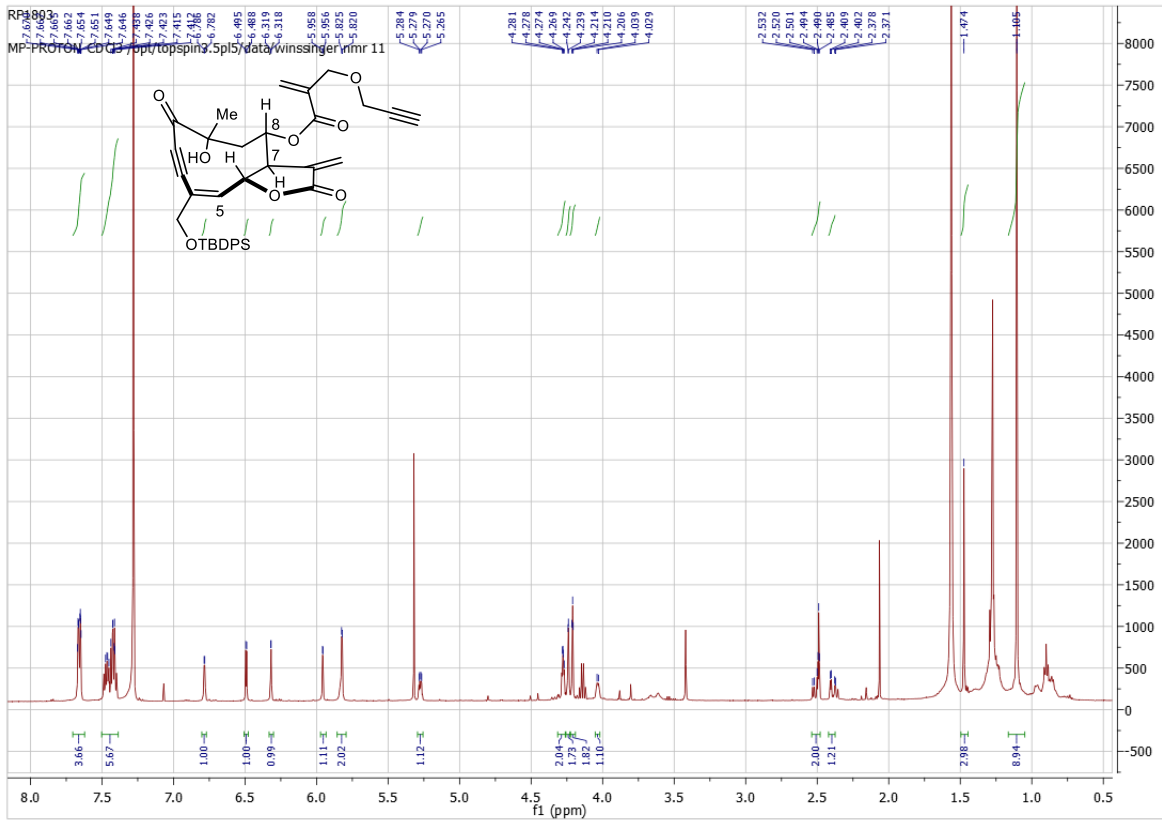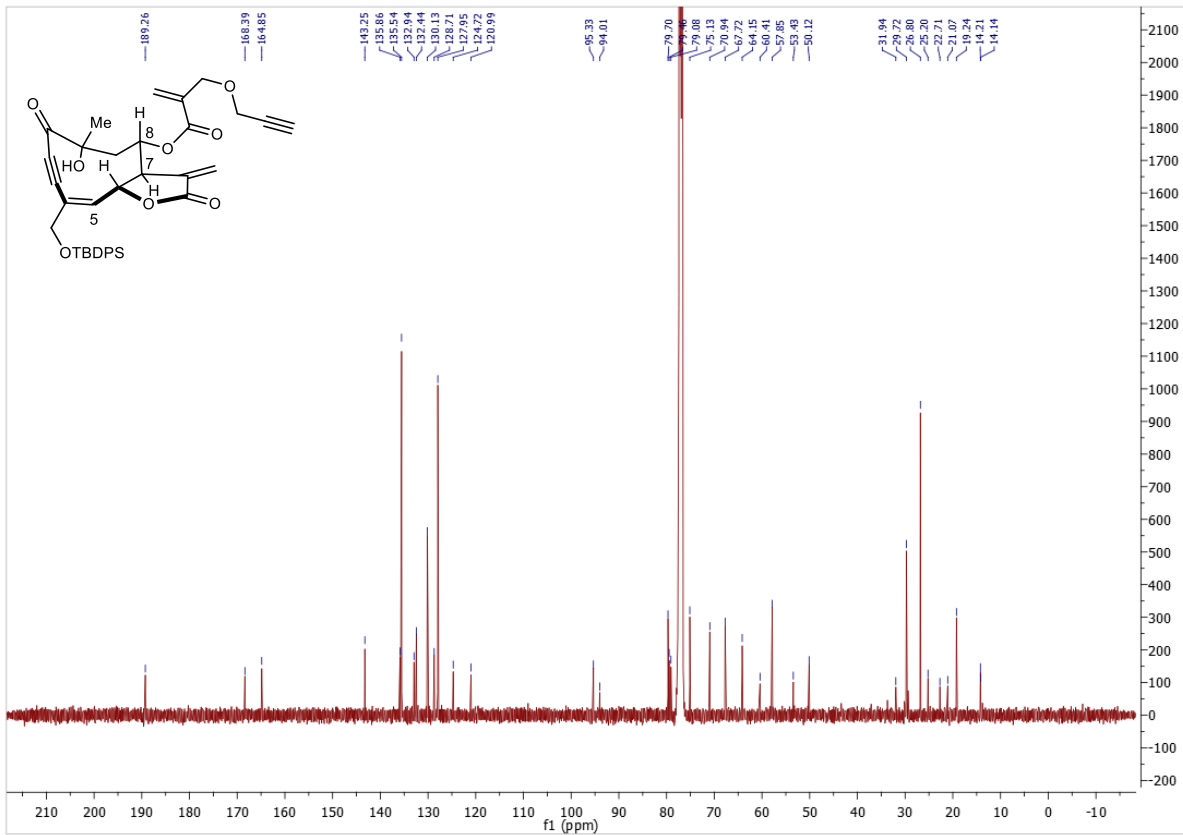



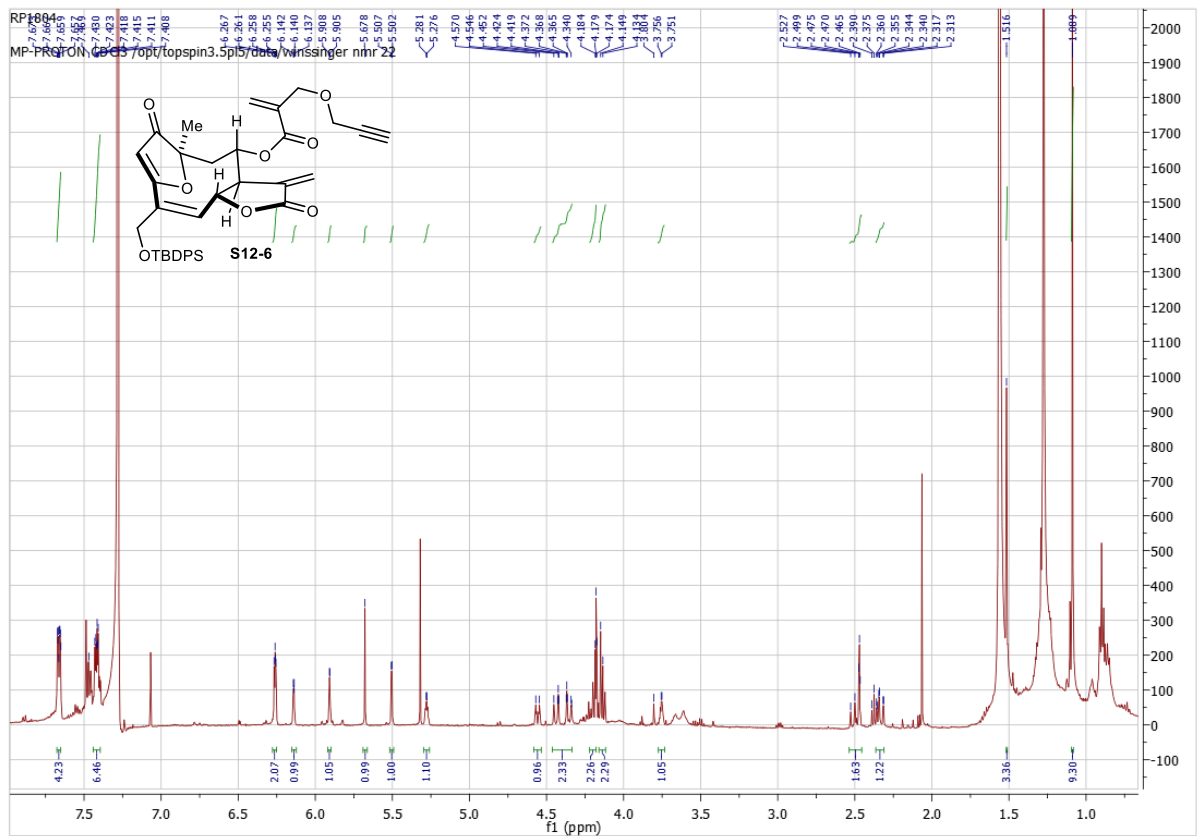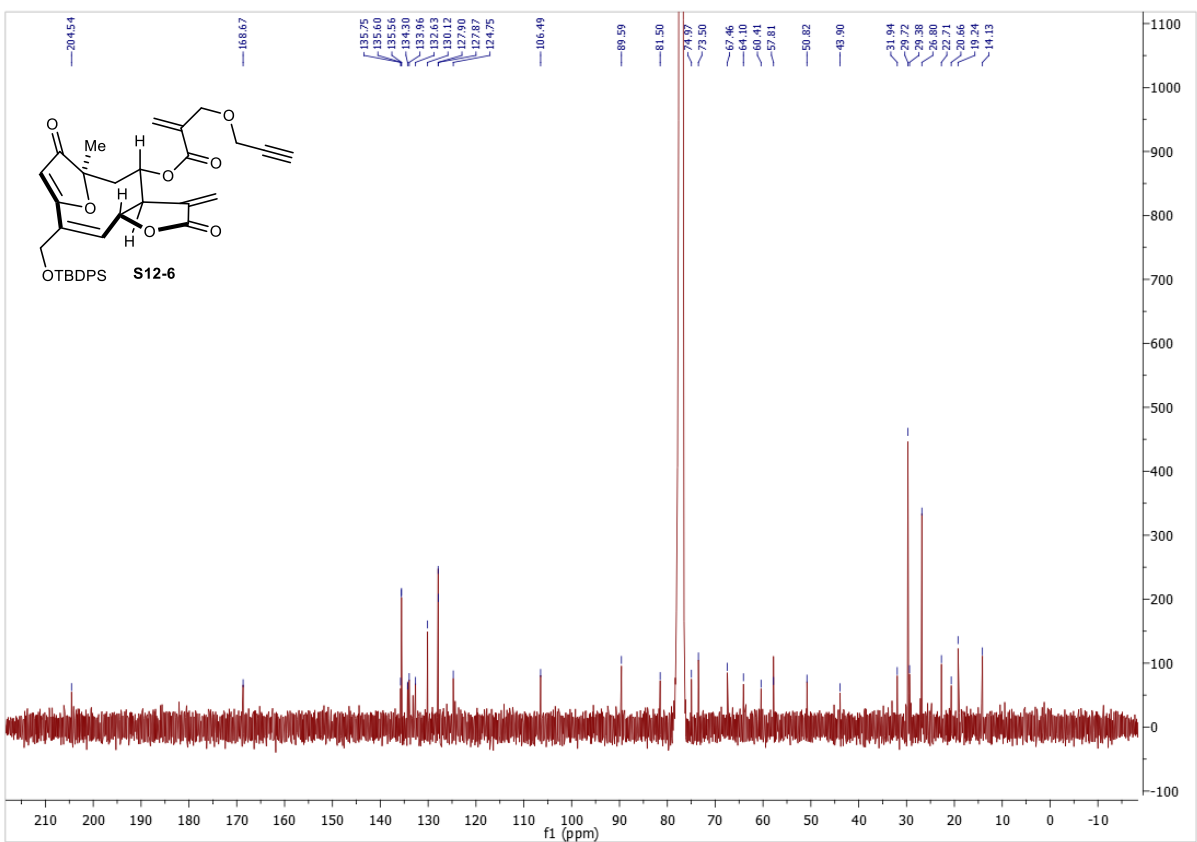

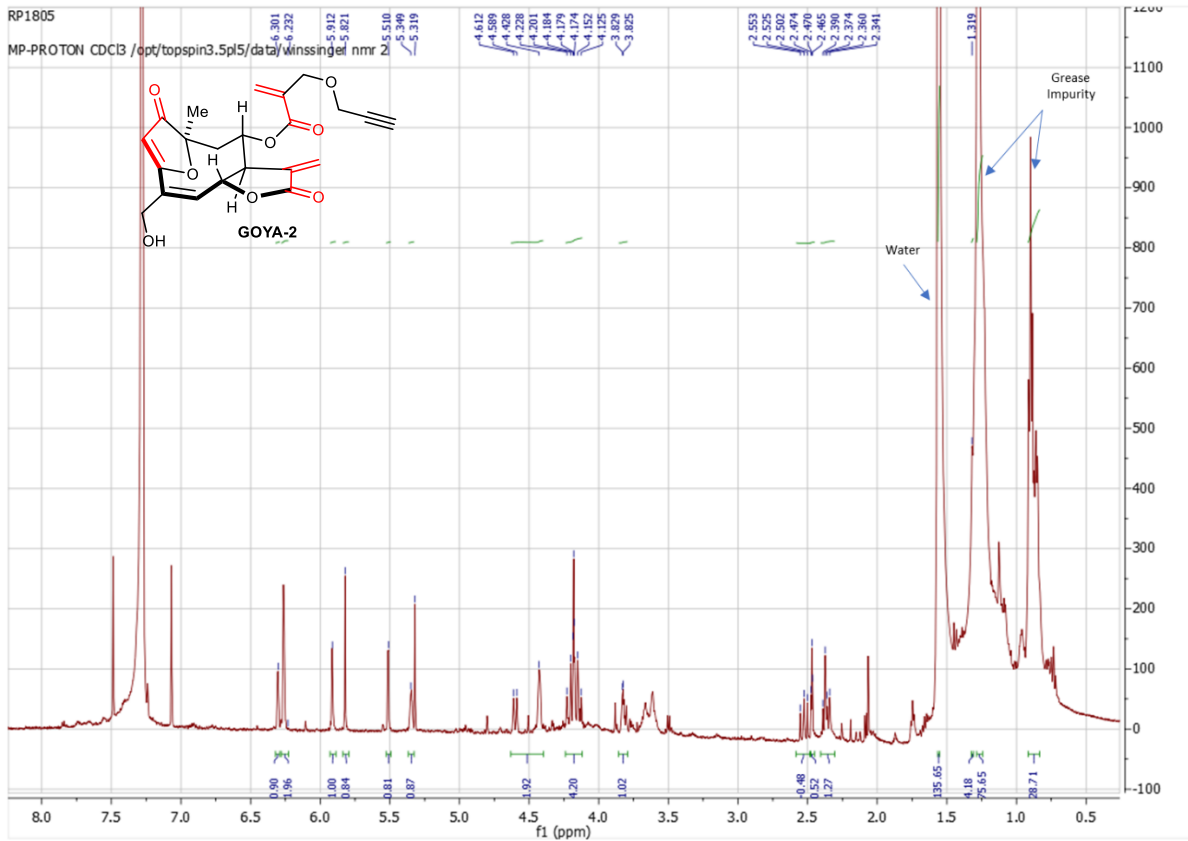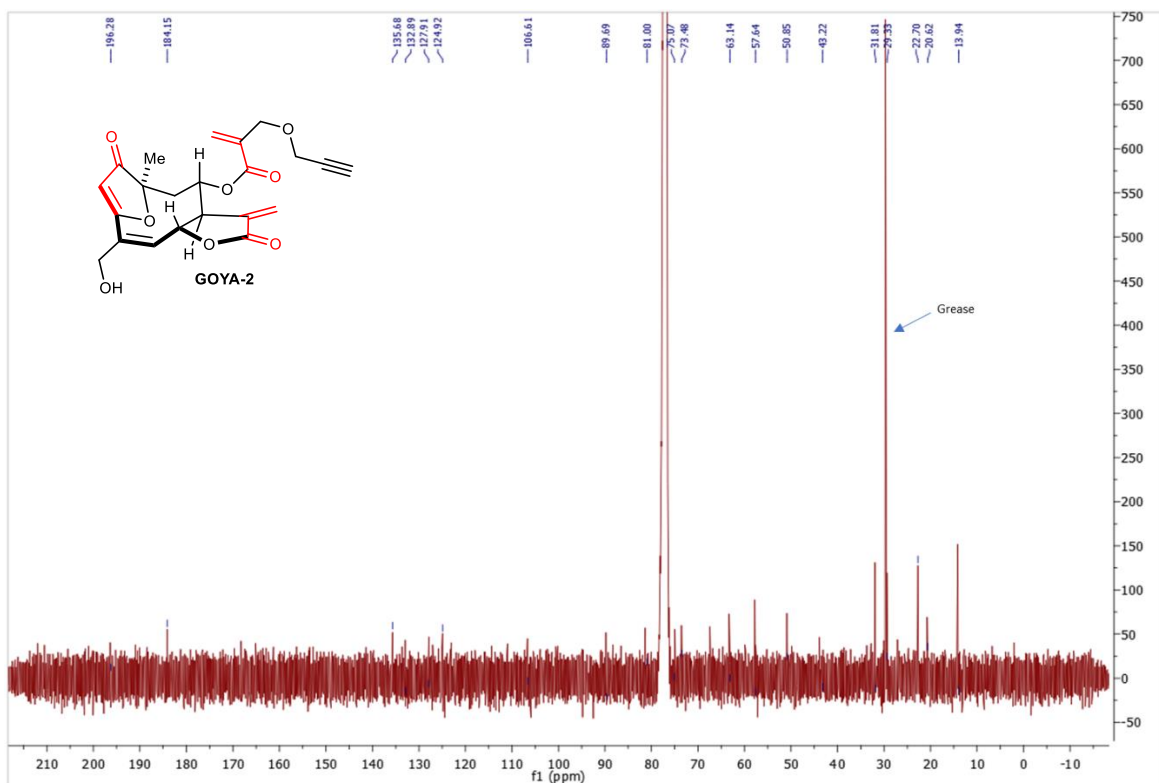

### m) X-Ray data of 2, 30 and 34

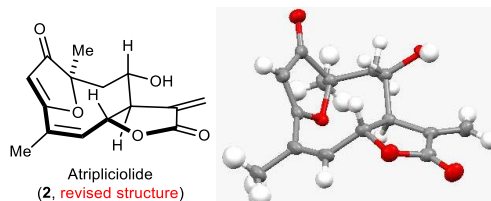

**Table 1 Crystal data and structure refinement for WL2.**

|                                             |                                                               |
|---------------------------------------------|---------------------------------------------------------------|
| Identification code                         | WL2                                                           |
| Empirical formula                           | C <sub>15</sub> H <sub>16</sub> O <sub>5</sub>                |
| Formula weight                              | 276.28                                                        |
| Temperature/K                               | 149.99(10)                                                    |
| Crystal system                              | orthorhombic                                                  |
| Space group                                 | P2 <sub>1</sub> 2 <sub>1</sub> 2 <sub>1</sub>                 |
| a/Å                                         | 8.11197(3)                                                    |
| b/Å                                         | 9.30326(4)                                                    |
| c/Å                                         | 17.61440(7)                                                   |
| α/°                                         | 90                                                            |
| β/°                                         | 90                                                            |
| γ/°                                         | 90                                                            |
| Volume/Å <sup>3</sup>                       | 1329.320(9)                                                   |
| Z                                           | 4                                                             |
| ρ <sub>calc</sub> /cm <sup>3</sup>          | 1.380                                                         |
| μ/mm <sup>-1</sup>                          | 0.866                                                         |
| F(000)                                      | 584.0                                                         |
| Crystal size/mm <sup>3</sup>                | 0.214 × 0.169 × 0.102                                         |
| Radiation                                   | Cu Kα (λ = 1.54184)                                           |
| 2θ range for data collection/°              | 10.044 to 147.598                                             |
| Index ranges                                | -10 ≤ h ≤ 9, -11 ≤ k ≤ 11, -21 ≤ l ≤ 21                       |
| Reflections collected                       | 61110                                                         |
| Independent reflections                     | 2690 [R <sub>int</sub> = 0.0304, R <sub>sigma</sub> = 0.0071] |
| Data/restraints/parameters                  | 2690/0/189                                                    |
| Goodness-of-fit on F <sup>2</sup>           | 1.043                                                         |
| Final R indexes [I >= 2σ (I)]               | R <sub>1</sub> = 0.0233, wR <sub>2</sub> = 0.0605             |
| Final R indexes [all data]                  | R <sub>1</sub> = 0.0235, wR <sub>2</sub> = 0.0606             |
| Largest diff. peak/hole / e Å <sup>-3</sup> | 0.18/-0.12                                                    |
| Flack parameter                             | -0.01(17)                                                     |

**Table 2 Fractional Atomic Coordinates (×10<sup>4</sup>) and Equivalent Isotropic Displacement Parameters (Å<sup>2</sup>×10<sup>3</sup>) for WL2. U<sub>eq</sub> is defined as 1/3 of the trace of the orthogonalised U<sub>ij</sub> tensor.**

| Atom | x          | y          | z         | U(eq)   |
|------|------------|------------|-----------|---------|
| O1   | 5570.9(15) | 8694.9(15) | 7454.2(7) | 40.0(3) |
| O7   | 6273.6(13) | 5594.8(12) | 5471.0(7) | 28.7(3) |
| O12  | 2119.0(17) | 2290.0(12) | 4442.5(7) | 39.2(3) |
| O13  | 1707.8(15) | 3217.2(12) | 5595.5(6) | 33.1(3) |

|     |            |             |            |         |
|-----|------------|-------------|------------|---------|
| O19 | 2185.6(12) | 8008.4(11)  | 6258.8(6)  | 23.8(2) |
| C2  | 4301.7(19) | 8275.6(18)  | 7156.7(9)  | 29.0(3) |
| C3  | 3849.5(18) | 8589.2(16)  | 6328.7(8)  | 24.0(3) |
| C4  | 3839(2)    | 10179.8(17) | 6142.1(10) | 33.8(4) |
| C5  | 4943.2(18) | 7730.0(15)  | 5784.2(8)  | 22.6(3) |
| C6  | 4828.0(17) | 6088.2(15)  | 5841.6(8)  | 20.9(3) |
| C8  | 3182.2(17) | 5477.9(14)  | 5492.6(8)  | 21.1(3) |
| C9  | 3368.3(17) | 4549.8(15)  | 4799.1(8)  | 23.5(3) |
| C10 | 4209(2)    | 4768.4(19)  | 4166.9(9)  | 33.1(4) |
| C11 | 2368.5(19) | 3238.0(16)  | 4899.9(9)  | 28.0(3) |
| C14 | 2193.1(19) | 4481.9(16)  | 6043.1(9)  | 25.7(3) |
| C15 | 621.2(19)  | 5048.5(18)  | 6391.9(9)  | 30.5(3) |
| C16 | 447.3(19)  | 6240.3(19)  | 6801.7(9)  | 29.4(3) |
| C17 | -1153(2)   | 6710(2)     | 7159.3(11) | 40.6(4) |
| C18 | 1883.6(19) | 7206.5(17)  | 6890.2(8)  | 26.1(3) |
| C20 | 3000(2)    | 7374(2)     | 7447.9(9)  | 33.7(4) |

**Table 3 Anisotropic Displacement Parameters ( $\text{\AA}^2 \times 10^3$ ) for WL2. The Anisotropic displacement factor exponent takes the form:  $-2\pi^2[h^2a^*U_{11}+2hka^*b^*U_{12}+\dots]$ .**

| Atom | U <sub>11</sub> | U <sub>22</sub> | U <sub>33</sub> | U <sub>23</sub> | U <sub>13</sub> | U <sub>12</sub> |
|------|-----------------|-----------------|-----------------|-----------------|-----------------|-----------------|
| O1   | 29.3(6)         | 54.5(8)         | 36.2(6)         | -14.2(6)        | -6.2(5)         | -2.3(6)         |
| O7   | 18.9(5)         | 25.9(5)         | 41.5(6)         | -8.5(5)         | 0.7(5)          | 2.9(4)          |
| O12  | 48.4(7)         | 27.2(6)         | 42.1(7)         | -5.8(5)         | -3.4(6)         | -11.7(5)        |
| O13  | 39.2(7)         | 25.2(5)         | 34.9(6)         | 2.1(4)          | 0.8(5)          | -11.1(5)        |
| O19  | 19.8(5)         | 24.6(5)         | 27.0(5)         | 2.1(4)          | -0.4(4)         | 2.1(4)          |
| C2   | 24.8(7)         | 35.5(8)         | 26.8(7)         | -9.5(6)         | -0.2(6)         | 4.3(6)          |
| C3   | 19.9(7)         | 22.9(7)         | 29.1(7)         | -2.5(6)         | 0.3(6)          | 0.4(5)          |
| C4   | 32.4(8)         | 22.6(7)         | 46.5(9)         | -4.0(7)         | 4.3(7)          | 1.3(6)          |
| C5   | 20.1(7)         | 21.6(7)         | 26.2(7)         | -1.7(6)         | 1.0(6)          | -1.8(5)         |
| C6   | 18.1(6)         | 20.7(7)         | 24.0(7)         | -1.0(5)         | -1.3(5)         | 1.2(5)          |
| C8   | 18.0(7)         | 21.2(6)         | 24.0(6)         | 2.4(5)          | -1.2(5)         | -0.3(5)         |
| C9   | 21.3(7)         | 21.9(7)         | 27.4(7)         | -0.2(6)         | -4.9(5)         | -1.1(5)         |
| C10  | 33.1(9)         | 36.1(9)         | 30.0(8)         | -6.9(7)         | 1.7(7)          | -9.0(7)         |
| C11  | 28.4(8)         | 24.1(7)         | 31.4(7)         | 1.6(6)          | -5.2(6)         | -2.4(6)         |
| C14  | 24.6(7)         | 25.8(7)         | 26.7(7)         | 2.4(6)          | -2.3(6)         | -5.5(6)         |
| C15  | 22.2(7)         | 38.9(9)         | 30.4(7)         | 6.7(7)          | 0.5(6)          | -7.7(7)         |
| C16  | 20.1(7)         | 40.9(9)         | 27.2(7)         | 8.5(7)          | 2.8(6)          | -0.6(6)         |
| C17  | 23.7(8)         | 54.7(11)        | 43.4(9)         | 1.6(9)          | 8.2(7)          | 0.1(8)          |
| C18  | 22.0(7)         | 31.6(7)         | 24.6(7)         | 0.7(6)          | 4.3(6)          | 4.5(6)          |
| C20  | 28.7(8)         | 49.2(10)        | 23.1(7)         | 2.3(7)          | 1.3(6)          | 1.8(7)          |

**Table 4 Bond Lengths for WL2.**

| Atom | Atom | Length/ $\text{\AA}$ | Atom | Atom | Length/ $\text{\AA}$ |
|------|------|----------------------|------|------|----------------------|
| O1   | C2   | 1.219(2)             | C5   | C6   | 1.5336(18)           |
| O7   | C6   | 1.4185(17)           | C6   | C8   | 1.5756(18)           |
| O12  | C11  | 1.2115(19)           | C8   | C9   | 1.504(2)             |
| O13  | C11  | 1.337(2)             | C8   | C14  | 1.5628(19)           |
| O13  | C14  | 1.4701(18)           | C9   | C10  | 1.321(2)             |
| O19  | C3   | 1.4591(17)           | C9   | C11  | 1.476(2)             |
| O19  | C18  | 1.3615(18)           | C14  | C15  | 1.510(2)             |
| C2   | C3   | 1.532(2)             | C15  | C16  | 1.331(2)             |
| C2   | C20  | 1.443(2)             | C16  | C17  | 1.508(2)             |

|    |    |          |     |     |          |
|----|----|----------|-----|-----|----------|
| C3 | C4 | 1.516(2) | C16 | C18 | 1.480(2) |
| C3 | C5 | 1.532(2) | C18 | C20 | 1.345(2) |

**Table 5 Bond Angles for WL2.**

| Atom | Atom | Atom | Angle/°    | Atom | Atom | Atom | Angle/°    |
|------|------|------|------------|------|------|------|------------|
| C11  | O13  | C14  | 111.86(11) | C10  | C9   | C8   | 130.40(14) |
| C18  | O19  | C3   | 107.48(11) | C10  | C9   | C11  | 120.80(14) |
| O1   | C2   | C3   | 123.40(15) | C11  | C9   | C8   | 108.78(12) |
| O1   | C2   | C20  | 130.63(16) | O12  | C11  | O13  | 122.12(14) |
| C20  | C2   | C3   | 105.89(12) | O12  | C11  | C9   | 127.86(15) |
| O19  | C3   | C2   | 103.38(11) | O13  | C11  | C9   | 110.02(13) |
| O19  | C3   | C4   | 109.76(12) | O13  | C14  | C8   | 106.22(11) |
| O19  | C3   | C5   | 106.84(11) | O13  | C14  | C15  | 105.75(12) |
| C4   | C3   | C2   | 113.19(13) | C15  | C14  | C8   | 118.61(13) |
| C4   | C3   | C5   | 112.13(13) | C16  | C15  | C14  | 126.94(14) |
| C5   | C3   | C2   | 110.98(12) | C15  | C16  | C17  | 124.01(15) |
| C3   | C5   | C6   | 116.30(12) | C15  | C16  | C18  | 118.68(14) |
| O7   | C6   | C5   | 103.98(12) | C18  | C16  | C17  | 117.26(15) |
| O7   | C6   | C8   | 113.85(11) | O19  | C18  | C16  | 112.86(13) |
| C5   | C6   | C8   | 112.63(11) | C20  | C18  | O19  | 114.33(14) |
| C9   | C8   | C6   | 116.03(11) | C20  | C18  | C16  | 132.65(15) |
| C9   | C8   | C14  | 102.42(11) | C18  | C20  | C2   | 107.49(14) |
| C14  | C8   | C6   | 113.99(11) |      |      |      |            |

**Table 6 Torsion Angles for WL2.**

| A   | B   | C   | D   | Angle/°     | A   | B   | C   | D   | Angle/°     |
|-----|-----|-----|-----|-------------|-----|-----|-----|-----|-------------|
| O1  | C2  | C3  | O19 | -174.50(14) | C8  | C14 | C15 | C16 | -56.1(2)    |
| O1  | C2  | C3  | C4  | -55.8(2)    | C9  | C8  | C14 | O13 | -8.00(14)   |
| O1  | C2  | C3  | C5  | 71.28(19)   | C9  | C8  | C14 | C15 | -126.73(13) |
| O1  | C2  | C20 | C18 | -178.89(17) | C10 | C9  | C11 | O12 | -4.1(3)     |
| O7  | C6  | C8  | C9  | -3.60(17)   | C10 | C9  | C11 | O13 | 176.64(14)  |
| O7  | C6  | C8  | C14 | 115.04(14)  | C11 | O13 | C14 | C8  | 5.74(16)    |
| O13 | C14 | C15 | C16 | -175.11(15) | C11 | O13 | C14 | C15 | 132.62(13)  |
| O19 | C3  | C5  | C6  | -50.30(16)  | C14 | O13 | C11 | O12 | 179.96(15)  |
| O19 | C18 | C20 | C2  | -5.94(19)   | C14 | O13 | C11 | C9  | -0.76(17)   |
| C2  | C3  | C5  | C6  | 61.72(17)   | C14 | C8  | C9  | C10 | -173.89(16) |
| C3  | O19 | C18 | C16 | -164.15(12) | C14 | C8  | C9  | C11 | 7.74(15)    |
| C3  | O19 | C18 | C20 | 11.69(17)   | C14 | C15 | C16 | C17 | -177.47(15) |
| C3  | C2  | C20 | C18 | -2.05(18)   | C14 | C15 | C16 | C18 | 5.2(2)      |
| C3  | C5  | C6  | O7  | -162.34(12) | C15 | C16 | C18 | O19 | 76.26(18)   |
| C3  | C5  | C6  | C8  | 73.94(16)   | C15 | C16 | C18 | C20 | -98.6(2)    |
| C4  | C3  | C5  | C6  | -170.60(13) | C16 | C18 | C20 | C2  | 168.85(16)  |
| C5  | C6  | C8  | C9  | 114.45(13)  | C17 | C16 | C18 | O19 | -101.23(16) |
| C5  | C6  | C8  | C14 | -126.90(13) | C17 | C16 | C18 | C20 | 83.9(2)     |
| C6  | C8  | C9  | C10 | -49.1(2)    | C18 | O19 | C3  | C2  | -11.74(14)  |
| C6  | C8  | C9  | C11 | 132.55(13)  | C18 | O19 | C3  | C4  | -132.77(13) |
| C6  | C8  | C14 | O13 | -134.15(12) | C18 | O19 | C3  | C5  | 105.43(13)  |
| C6  | C8  | C14 | C15 | 107.12(14)  | C20 | C2  | C3  | O19 | 8.37(15)    |
| C8  | C9  | C11 | O12 | 174.43(16)  | C20 | C2  | C3  | C4  | 127.05(15)  |
| C8  | C9  | C11 | O13 | -4.80(17)   | C20 | C2  | C3  | C5  | -105.85(14) |

**Table 7 Hydrogen Atom Coordinates ( $\text{\AA} \times 10^4$ ) and Isotropic Displacement Parameters ( $\text{\AA}^2 \times 10^3$ ) for WL2.**

| Atom | x        | y        | z        | U(eq) |
|------|----------|----------|----------|-------|
| H7   | 6290(30) | 4680(20) | 5494(12) | 45(6) |
| H4A  | 3497.02  | 10315.37 | 5613.29  | 51    |
| H4B  | 4948.34  | 10574.92 | 6213.23  | 51    |
| H4C  | 3065.47  | 10677.44 | 6478.95  | 51    |
| H5A  | 6103.62  | 8013.21  | 5873.34  | 27    |
| H5B  | 4659.92  | 8013.13  | 5258.35  | 27    |
| H6   | 4884.8   | 5807.29  | 6389     | 25    |
| H8   | 2462.37  | 6311.53  | 5356.35  | 25    |
| H10A | 4173.87  | 4076.8   | 3770.46  | 40    |
| H10B | 4847.59  | 5617.07  | 4108.93  | 40    |
| H14  | 2944.46  | 4162.26  | 6460.27  | 31    |
| H15  | -346.59  | 4494.77  | 6309.98  | 37    |
| H17A | -1002.74 | 6813.04  | 7708.6   | 61    |
| H17B | -2005.57 | 5987.95  | 7058.8   | 61    |
| H17C | -1492.36 | 7634.32  | 6942.81  | 61    |
| H20  | 2941.55  | 6972.47  | 7943     | 40    |

### Experimental

Single crystals of  $\text{C}_{15}\text{H}_{16}\text{O}_5$  [WL2] were [2]. A suitable crystal was selected and [2] on a **XtaLAB Synergy, Dualflex, HyPix-Arc** diffractometer. The crystal was kept at 149.99(10) K during data collection. Using Olex2 [1], the structure was solved with the SHELXT [2] structure solution program using Intrinsic Phasing and refined with the SHELXL [3] refinement package using Least Squares minimisation.

1. Dolomanov, O.V., Bourhis, L.J., Gildea, R.J., Howard, J.A.K. & Puschmann, H. (2009), *J. Appl. Cryst.* 42, 339-341.
2. Sheldrick, G.M. (2015). *Acta Cryst. A* 71, 3-8.
3. Sheldrick, G.M. (2015). *Acta Cryst. C* 71, 3-8.

### Crystal structure determination of [WL2]

**Crystal Data** for  $\text{C}_{15}\text{H}_{16}\text{O}_5$  ( $M = 276.28$  g/mol): orthorhombic, space group  $P2_12_12_1$  (no. 19),  $a = 8.11197(3)$   $\text{\AA}$ ,  $b = 9.30326(4)$   $\text{\AA}$ ,  $c = 17.61440(7)$   $\text{\AA}$ ,  $V = 1329.320(9)$   $\text{\AA}^3$ ,  $Z = 4$ ,  $T = 149.99(10)$  K,  $\mu(\text{Cu K}\alpha) = 0.866$   $\text{mm}^{-1}$ ,  $D_{\text{calc}} = 1.380$   $\text{g/cm}^3$ , 61110 reflections measured ( $10.044^\circ \leq 2\theta \leq 147.598^\circ$ ), 2690 unique ( $R_{\text{int}} = 0.0304$ ,  $R_{\text{sigma}} = 0.0071$ ) which were used in all calculations. The final  $R_1$  was 0.0233 ( $I > 2\sigma(I)$ ) and  $wR_2$  was 0.0606 (all data).

### Refinement model description

Number of restraints - 0, number of constraints - unknown.

Details:

1. Twinned data refinement

Scales: 1.01(17)

-0.01(17)

2. Fixed Uiso

At 1.2 times of:

All C(H) groups, All C(H,H) groups

At 1.5 times of:

All C(H,H,H) groups

3.a Ternary CH refined with riding coordinates:

C6(H6), C8(H8), C14(H14)

3.b Secondary CH2 refined with riding coordinates:

C5(H5A,H5B)

3.c Aromatic/amide H refined with riding coordinates:

C15(H15), C20(H20)

3.d X=CH2 refined with riding coordinates:

C10(H10A,H10B)

3.e Idealised Me refined as rotating group:

C4(H4A,H4B,H4C), C17(H17A,H17B,H17C)

This report has been created with Olex2, compiled on Nov 21 2019 18:26:39 for OlexSys.

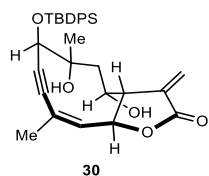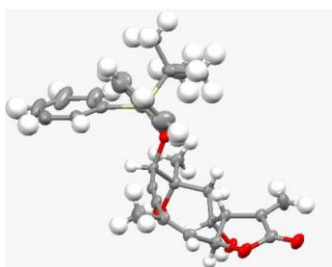

**Table 1 Crystal data and structure refinement for exp\_2516.**

|                                             |                                                               |
|---------------------------------------------|---------------------------------------------------------------|
| Identification code                         | exp_2516                                                      |
| Empirical formula                           | C <sub>31</sub> H <sub>36</sub> O <sub>5</sub> Si             |
| Formula weight                              | 516.69                                                        |
| Temperature/K                               | 180.01(10)                                                    |
| Crystal system                              | orthorhombic                                                  |
| Space group                                 | P2 <sub>1</sub> 2 <sub>1</sub> 2 <sub>1</sub>                 |
| a/Å                                         | 9.52826(14)                                                   |
| b/Å                                         | 11.72660(18)                                                  |
| c/Å                                         | 25.7421(4)                                                    |
| α/°                                         | 90                                                            |
| β/°                                         | 90                                                            |
| γ/°                                         | 90                                                            |
| Volume/Å <sup>3</sup>                       | 2876.27(8)                                                    |
| Z                                           | 4                                                             |
| ρ <sub>calc</sub> /cm <sup>3</sup>          | 1.193                                                         |
| μ/mm <sup>-1</sup>                          | 1.015                                                         |
| F(000)                                      | 1104.0                                                        |
| Crystal size/mm <sup>3</sup>                | 0.312 × 0.144 × 0.039                                         |
| Radiation                                   | CuKα (λ = 1.54184)                                            |
| 2θ range for data collection/°              | 6.868 to 141.618                                              |
| Index ranges                                | -11 ≤ h ≤ 10, -10 ≤ k ≤ 14, -31 ≤ l ≤ 28                      |
| Reflections collected                       | 22000                                                         |
| Independent reflections                     | 5480 [R <sub>int</sub> = 0.0418, R <sub>sigma</sub> = 0.0306] |
| Data/restraints/parameters                  | 5480/0/346                                                    |
| Goodness-of-fit on F <sup>2</sup>           | 1.069                                                         |
| Final R indexes [I >= 2σ (I)]               | R <sub>1</sub> = 0.0473, wR <sub>2</sub> = 0.1186             |
| Final R indexes [all data]                  | R <sub>1</sub> = 0.0524, wR <sub>2</sub> = 0.1215             |
| Largest diff. peak/hole / e Å <sup>-3</sup> | 0.69/-0.36                                                    |
| Flack parameter                             | 0.02(4)                                                       |

**Table 2 Fractional Atomic Coordinates (×10<sup>4</sup>) and Equivalent Isotropic Displacement Parameters (Å<sup>2</sup>×10<sup>3</sup>) for exp\_2516. U<sub>eq</sub> is defined as 1/3 of the trace of the orthogonalised U<sub>ij</sub> tensor.**

| Atom | x         | y           | z          | U(eq)    |
|------|-----------|-------------|------------|----------|
| Si1  | 4040.7(9) | 4210.0(7)   | 4263.6(3)  | 28.0(2)  |
| O5   | 850(3)    | 10947.3(18) | 3223.4(9)  | 40.7(6)  |
| O6   | 2309(2)   | 9819.9(18)  | 2780.1(9)  | 34.6(5)  |
| O14  | 2806(2)   | 4793.0(18)  | 3898.9(8)  | 28.8(5)  |
| O16  | 994(3)    | 4625.2(18)  | 2652.2(8)  | 30.5(5)  |
| O19  | -287(2)   | 7368.9(18)  | 2618.4(9)  | 29.8(5)  |
| C1   | 1698(3)   | 7967(2)     | 3118.4(11) | 25.9(6)  |
| C2   | 778(4)    | 8894(2)     | 3335.9(11) | 30.0(6)  |
| C3   | -349(5)   | 8840(3)     | 3638.2(16) | 49.3(10) |
| C4   | 1260(3)   | 9997(3)     | 3122.9(13) | 32.3(7)  |

|     |         |         |            |          |
|-----|---------|---------|------------|----------|
| C7  | 2557(3) | 8601(2) | 2698.8(12) | 27.7(6)  |
| C8  | 4122(3) | 8431(3) | 2699.7(12) | 30.8(6)  |
| C9  | 4833(3) | 7478(3) | 2800.8(12) | 30.6(6)  |
| C10 | 6416(3) | 7417(3) | 2758.6(17) | 44.1(9)  |
| C11 | 4151(3) | 6432(3) | 2951.6(12) | 28.4(6)  |
| C12 | 3541(3) | 5594(3) | 3100.7(11) | 26.7(6)  |
| C13 | 2670(3) | 4712(2) | 3346.1(11) | 25.5(6)  |
| C14 | 1092(3) | 4827(2) | 3198.0(11) | 25.7(6)  |
| C15 | 514(3)  | 6028(2) | 3298.1(12) | 27.5(6)  |
| C17 | 237(4)  | 3959(3) | 3503.6(13) | 33.2(7)  |
| C18 | 921(3)  | 6935(2) | 2890.2(11) | 23.6(5)  |
| C20 | 5597(4) | 5175(3) | 4334.3(13) | 36.5(7)  |
| C21 | 5504(5) | 6332(3) | 4223.8(16) | 49.5(9)  |
| C22 | 6632(6) | 7064(4) | 4336(2)    | 71.3(14) |
| C23 | 7842(6) | 6637(5) | 4558(2)    | 72.2(15) |
| C24 | 7945(5) | 5501(5) | 4671(2)    | 65.1(13) |
| C25 | 6844(4) | 4777(4) | 4554.3(16) | 49.3(9)  |
| C26 | 4635(4) | 2818(3) | 3974.1(13) | 40.0(8)  |
| C27 | 3862(5) | 1817(3) | 4013(2)    | 59.6(12) |
| C28 | 4357(6) | 798(4)  | 3808(2)    | 79.7(18) |
| C29 | 5635(7) | 759(5)  | 3553(2)    | 80.0(19) |
| C30 | 6404(7) | 1745(5) | 3499.8(17) | 72.9(16) |
| C31 | 5917(6) | 2762(4) | 3708.9(14) | 54.9(11) |
| C32 | 3171(4) | 4120(3) | 4925.9(13) | 38.0(7)  |
| C33 | 2908(6) | 5328(4) | 5117.7(17) | 61.6(12) |
| C34 | 1734(5) | 3522(5) | 4894.6(17) | 62.1(12) |
| C35 | 4085(5) | 3500(4) | 5321.5(14) | 55.0(10) |

**Table 3 Anisotropic Displacement Parameters ( $\text{\AA}^2 \times 10^3$ ) for exp\_2516. The Anisotropic displacement factor exponent takes the form:  $-2\pi^2[h^2a^*U_{11}+2hka^*b^*U_{12}+\dots]$ .**

| Atom | U <sub>11</sub> | U <sub>22</sub> | U <sub>33</sub> | U <sub>23</sub> | U <sub>13</sub> | U <sub>12</sub> |
|------|-----------------|-----------------|-----------------|-----------------|-----------------|-----------------|
| Si1  | 29.9(4)         | 23.6(4)         | 30.6(4)         | 1.0(3)          | -2.9(3)         | 0.0(3)          |
| O5   | 52.0(14)        | 18.0(10)        | 52.2(13)        | -4.4(9)         | -12.1(12)       | 7.5(11)         |
| O6   | 32.8(11)        | 18.6(10)        | 52.3(13)        | 7.0(9)          | -3.7(10)        | -2.6(9)         |
| O14  | 32.2(11)        | 25.2(10)        | 28.8(10)        | 0.3(8)          | -3.1(8)         | 2.8(9)          |
| O16  | 38.4(11)        | 19.2(9)         | 33.8(10)        | -1.1(8)         | -6.3(9)         | -1.1(9)         |
| O19  | 23.3(10)        | 20.5(10)        | 45.7(13)        | -0.8(9)         | -9.2(9)         | 2.8(8)          |
| C1   | 25.5(14)        | 19.0(13)        | 33.1(14)        | 0.0(11)         | -1.3(11)        | -1.3(11)        |
| C2   | 35.6(16)        | 21.4(14)        | 32.9(14)        | -3.3(10)        | -0.5(13)        | 1.2(12)         |
| C3   | 61(2)           | 32.2(18)        | 55(2)           | -1.5(15)        | 22.5(19)        | 10.6(17)        |
| C4   | 35.6(17)        | 23.4(15)        | 37.9(15)        | -1.1(12)        | -9.7(12)        | 1.2(13)         |
| C7   | 26.6(14)        | 20.6(13)        | 35.8(14)        | 1.6(11)         | -1.4(12)        | -3.9(12)        |
| C8   | 28.3(14)        | 25.5(14)        | 38.4(15)        | 1.0(11)         | 2.9(13)         | -10.3(13)       |
| C9   | 20.6(14)        | 33.0(16)        | 38.4(16)        | 0.7(13)         | 1.2(11)         | -2.4(13)        |
| C10  | 21.3(15)        | 43(2)           | 68(2)           | 3.7(17)         | 6.4(14)         | -0.7(14)        |
| C11  | 21.2(13)        | 26.2(14)        | 37.9(14)        | 1.4(12)         | -1.7(12)        | 5.5(12)         |
| C12  | 22.0(13)        | 24.8(15)        | 33.4(14)        | 0.5(11)         | -1.6(11)        | 5.8(12)         |
| C13  | 29.2(14)        | 18.2(13)        | 29.2(13)        | 0.6(10)         | -4.1(11)        | 6.0(12)         |
| C14  | 26.3(14)        | 19.7(13)        | 31.1(13)        | 0.4(10)         | -4.0(11)        | -2.4(12)        |
| C15  | 24.8(13)        | 20.3(14)        | 37.4(15)        | 1.8(11)         | 1.8(11)         | -0.5(11)        |
| C17  | 36.3(17)        | 20.9(14)        | 42.4(17)        | 3.5(12)         | -2.3(13)        | -4.7(13)        |
| C18  | 20.3(12)        | 15.8(12)        | 34.6(13)        | 1.0(10)         | -1.5(11)        | 3.0(11)         |



|     |          |          |          |          |           |           |
|-----|----------|----------|----------|----------|-----------|-----------|
| C20 | 33.5(16) | 38.2(17) | 37.7(16) | 0.4(13)  | -1.8(13)  | -8.5(14)  |
| C21 | 60(2)    | 36.5(18) | 52(2)    | 2.2(16)  | -14.0(18) | -15.2(18) |
| C22 | 89(4)    | 51(3)    | 75(3)    | 10(2)    | -18(3)    | -30(3)    |
| C23 | 64(3)    | 81(4)    | 71(3)    | -1(3)    | -13(2)    | -37(3)    |
| C24 | 32.9(19) | 83(4)    | 79(3)    | 2(3)     | -6.6(19)  | -16(2)    |
| C25 | 36.0(19) | 57(2)    | 55(2)    | 5.0(18)  | -3.4(16)  | -4.7(18)  |
| C26 | 52(2)    | 34.1(17) | 33.6(16) | -1.8(13) | -14.5(15) | 12.1(16)  |
| C27 | 52(2)    | 39(2)    | 88(3)    | -20(2)   | -28(2)    | 4.2(19)   |
| C28 | 83(4)    | 39(2)    | 117(4)   | -26(3)   | -55(3)    | 12(3)     |
| C29 | 114(5)   | 59(3)    | 68(3)    | -31(2)   | -47(3)    | 52(3)     |
| C30 | 108(4)   | 73(3)    | 37.7(19) | -4(2)    | 1(2)      | 49(3)     |
| C31 | 81(3)    | 46(2)    | 37.4(17) | 3.5(15)  | 8(2)      | 25(2)     |
| C32 | 34.4(16) | 45(2)    | 34.3(15) | 4.4(14)  | -2.0(13)  | -2.0(16)  |
| C33 | 77(3)    | 60(3)    | 48(2)    | -5.2(19) | 13(2)     | 16(2)     |
| C34 | 48(2)    | 92(4)    | 47(2)    | 13(2)    | 2.2(18)   | -18(2)    |
| C35 | 53(2)    | 75(3)    | 37.4(17) | 13.4(18) | 0.7(18)   | 14(2)     |

**Table 4 Bond Lengths for exp\_2516.**

| Atom | Atom | Length/Å | Atom | Atom | Length/Å  |
|------|------|----------|------|------|-----------|
| Si1  | O14  | 1.653(2) | C12  | C13  | 1.468(4)  |
| Si1  | C20  | 1.874(3) | C13  | C14  | 1.557(4)  |
| Si1  | C26  | 1.882(4) | C14  | C15  | 1.535(4)  |
| Si1  | C32  | 1.899(3) | C14  | C17  | 1.522(4)  |
| O5   | C4   | 1.209(4) | C15  | C18  | 1.544(4)  |
| O6   | C4   | 1.350(4) | C20  | C21  | 1.389(5)  |
| O6   | C7   | 1.464(3) | C20  | C25  | 1.396(5)  |
| O14  | C13  | 1.432(3) | C21  | C22  | 1.406(6)  |
| O16  | C14  | 1.428(3) | C22  | C23  | 1.380(8)  |
| O19  | C18  | 1.440(3) | C23  | C24  | 1.367(8)  |
| C1   | C2   | 1.505(4) | C24  | C25  | 1.383(6)  |
| C1   | C7   | 1.546(4) | C26  | C27  | 1.390(6)  |
| C1   | C18  | 1.535(4) | C26  | C31  | 1.401(6)  |
| C2   | C3   | 1.327(5) | C27  | C28  | 1.388(6)  |
| C2   | C4   | 1.478(4) | C28  | C29  | 1.385(10) |
| C7   | C8   | 1.504(4) | C29  | C30  | 1.375(9)  |
| C8   | C9   | 1.332(5) | C30  | C31  | 1.389(6)  |
| C9   | C10  | 1.514(4) | C32  | C33  | 1.522(6)  |
| C9   | C11  | 1.441(4) | C32  | C34  | 1.540(6)  |
| C11  | C12  | 1.205(4) | C32  | C35  | 1.524(5)  |

**Table 5 Bond Angles for exp\_2516.**

| Atom | Atom | Atom | Angle/°    | Atom | Atom | Atom | Angle/°  |
|------|------|------|------------|------|------|------|----------|
| O14  | Si1  | C20  | 111.62(14) | O16  | C14  | C17  | 111.3(2) |
| O14  | Si1  | C26  | 110.37(13) | C15  | C14  | C13  | 112.6(2) |
| O14  | Si1  | C32  | 102.85(13) | C17  | C14  | C13  | 109.4(2) |
| C20  | Si1  | C26  | 108.90(17) | C17  | C14  | C15  | 109.6(2) |
| C20  | Si1  | C32  | 106.98(16) | C14  | C15  | C18  | 115.4(2) |
| C26  | Si1  | C32  | 116.02(17) | O19  | C18  | C1   | 107.0(2) |
| C4   | O6   | C7   | 111.3(2)   | O19  | C18  | C15  | 111.9(2) |
| C13  | O14  | Si1  | 126.99(19) | C1   | C18  | C15  | 113.8(2) |
| C2   | C1   | C7   | 102.7(2)   | C21  | C20  | Si1  | 121.3(3) |
| C2   | C1   | C18  | 115.5(3)   | C21  | C20  | C25  | 117.6(4) |

|     |     |     |          |     |     |     |          |
|-----|-----|-----|----------|-----|-----|-----|----------|
| C18 | C1  | C7  | 111.5(2) | C25 | C20 | Si1 | 120.7(3) |
| C3  | C2  | C1  | 130.9(3) | C20 | C21 | C22 | 120.4(4) |
| C3  | C2  | C4  | 120.7(3) | C23 | C22 | C21 | 120.1(5) |
| C4  | C2  | C1  | 108.3(3) | C24 | C23 | C22 | 120.1(4) |
| O5  | C4  | O6  | 121.4(3) | C23 | C24 | C25 | 119.8(5) |
| O5  | C4  | C2  | 128.8(3) | C24 | C25 | C20 | 121.9(4) |
| O6  | C4  | C2  | 109.8(3) | C27 | C26 | Si1 | 123.0(3) |
| O6  | C7  | C1  | 106.5(2) | C27 | C26 | C31 | 117.3(4) |
| O6  | C7  | C8  | 106.8(2) | C31 | C26 | Si1 | 119.7(3) |
| C8  | C7  | C1  | 117.4(3) | C28 | C27 | C26 | 121.3(5) |
| C9  | C8  | C7  | 128.0(3) | C29 | C28 | C27 | 120.5(5) |
| C8  | C9  | C10 | 122.1(3) | C30 | C29 | C28 | 119.2(4) |
| C8  | C9  | C11 | 122.5(3) | C29 | C30 | C31 | 120.4(6) |
| C11 | C9  | C10 | 115.4(3) | C30 | C31 | C26 | 121.3(5) |
| C12 | C11 | C9  | 176.1(3) | C33 | C32 | Si1 | 108.1(3) |
| C11 | C12 | C13 | 169.8(3) | C33 | C32 | C34 | 107.1(4) |
| O14 | C13 | C12 | 109.2(2) | C33 | C32 | C35 | 108.7(3) |
| O14 | C13 | C14 | 109.0(2) | C34 | C32 | Si1 | 111.5(3) |
| C12 | C13 | C14 | 112.3(2) | C35 | C32 | Si1 | 112.2(3) |
| O16 | C14 | C13 | 106.8(2) | C35 | C32 | C34 | 109.0(3) |
| O16 | C14 | C15 | 107.1(2) |     |     |     |          |

**Table 6 Hydrogen Atom Coordinates ( $\text{\AA} \times 10^4$ ) and Isotropic Displacement Parameters ( $\text{\AA}^2 \times 10^3$ ) for exp\_2516.**

| Atom | x        | y        | z        | U(eq) |
|------|----------|----------|----------|-------|
| H16  | 820(50)  | 3960(40) | 2618(17) | 46    |
| H19  | -470(50) | 6940(40) | 2407(18) | 45    |
| H1   | 2349.84  | 7696.53  | 3396.82  | 31    |
| H3A  | -853.87  | 9515.38  | 3719.8   | 59    |
| H3B  | -649.54  | 8126.97  | 3773.05  | 59    |
| H7   | 2184.75  | 8385     | 2349.17  | 33    |
| H8   | 4670.46  | 9082.85  | 2618.02  | 37    |
| H10A | 6804.41  | 7105.76  | 3081.19  | 66    |
| H10B | 6792.75  | 8184.19  | 2700.24  | 66    |
| H10C | 6674.11  | 6922.84  | 2467.01  | 66    |
| H13  | 3013.07  | 3946.21  | 3232.1   | 31    |
| H15A | 849.83   | 6287.31  | 3642.44  | 33    |
| H15B | -522.46  | 5983.48  | 3314.59  | 33    |
| H17A | -724.92  | 3939.66  | 3368.98  | 50    |
| H17B | 221.14   | 4176.68  | 3871.17  | 50    |
| H17C | 663.81   | 3203.18  | 3467.47  | 50    |
| H18  | 1552.91  | 6565.36  | 2629.67  | 28    |
| H21  | 4672.63  | 6629.79  | 4071.67  | 59    |
| H22  | 6561.62  | 7854.18  | 4259.09  | 86    |
| H23  | 8603.75  | 7133.74  | 4631.92  | 87    |
| H24  | 8771.12  | 5210.54  | 4829.72  | 78    |
| H25  | 6938.86  | 3985.89  | 4625.83  | 59    |
| H27  | 2976.78  | 1829.49  | 4182.69  | 72    |
| H28  | 3815.08  | 122.23   | 3843.38  | 96    |
| H29  | 5977.06  | 60.34    | 3415.32  | 96    |
| H30  | 7273.79  | 1729.2   | 3319.42  | 87    |
| H31  | 6464.22  | 3434.6   | 3671.19  | 66    |

|      |         |         |         |    |
|------|---------|---------|---------|----|
| H33A | 3804.23 | 5731.59 | 5150.01 | 92 |
| H33B | 2443.68 | 5300.99 | 5457.26 | 92 |
| H33C | 2305.46 | 5730.75 | 4869.43 | 92 |
| H34A | 1149.53 | 3902.62 | 4633.75 | 93 |
| H34B | 1269.94 | 3560.33 | 5233.91 | 93 |
| H34C | 1868.1  | 2721.82 | 4796.23 | 93 |
| H35A | 4234.73 | 2712.13 | 5207.84 | 83 |
| H35B | 3615.51 | 3501.37 | 5660.27 | 83 |
| H35C | 4991.63 | 3889.32 | 5350.75 | 83 |

## Experimental

Single crystals of  $C_{31}H_{36}O_5Si$  [exp\_2516] were [30]. A suitable crystal was selected and [30] on a **SuperNova, Dual, Cu at home/near, Atlas** diffractometer. The crystal was kept at 180.01(10) K during data collection. Using Olex2 [1], the structure was solved with the olex2.solve [2] structure solution program using Charge Flipping and refined with the ShelXL [3] refinement package using Least Squares minimisation.

1. Dolomanov, O.V., Bourhis, L.J., Gildea, R.J., Howard, J.A.K. & Puschmann, H. (2009), *J. Appl. Cryst.* 42, 339-341.
2. Bourhis, L.J., Dolomanov, O.V., Gildea, R.J., Howard, J.A.K., Puschmann, H. (2015). *Acta Cryst. A* 71, 59-75.
3. Sheldrick, G.M. (2015). *Acta Cryst. C* 71, 3-8.

## Crystal structure determination of [exp\_2516]

**Crystal Data** for  $C_{31}H_{36}O_5Si$  ( $M = 516.69$  g/mol): orthorhombic, space group  $P2_12_12_1$  (no. 19),  $a = 9.52826(14)$  Å,  $b = 11.72660(18)$  Å,  $c = 25.7421(4)$  Å,  $V = 2876.27(8)$  Å<sup>3</sup>,  $Z = 4$ ,  $T = 180.01(10)$  K,  $\mu(CuK\alpha) = 1.015$  mm<sup>-1</sup>,  $D_{calc} = 1.193$  g/cm<sup>3</sup>, 22000 reflections measured ( $6.868^\circ \leq 2\theta \leq 141.618^\circ$ ), 5480 unique ( $R_{int} = 0.0418$ ,  $R_{\sigma} = 0.0306$ ) which were used in all calculations. The final  $R_1$  was 0.0473 ( $I > 2\sigma(I)$ ) and  $wR_2$  was 0.1215 (all data).

## Refinement model description

Number of restraints - 0, number of constraints - unknown.

Details:

1. Twinned data refinement

Scales: 0.98(4)

0.02(4)

2. Fixed Uiso

At 1.2 times of:

All C(H) groups, All C(H,H) groups

At 1.5 times of:

All C(H,H,H) groups, All O(H) groups

3.a Ternary CH refined with riding coordinates:

C1(H1), C7(H7), C13(H13), C18(H18)

3.b Secondary CH2 refined with riding coordinates:

C15(H15A,H15B)

3.c Aromatic/amide H refined with riding coordinates:

C8(H8), C21(H21), C22(H22), C23(H23), C24(H24), C25(H25), C27(H27), C28(H28), C29(H29), C30(H30), C31(H31)

3.d X=CH2 refined with riding coordinates:

C3(H3A,H3B)

3.e Idealised Me refined as rotating group:

C10(H10A,H10B,H10C), C17(H17A,H17B,H17C), C33(H33A,H33B,H33C), C34(H34A,H34B, H34C), C35(H35A,H35B,H35C)

This report has been created with Olex2, compiled on 2018.05.29 svn.r3508 for OlexSys.

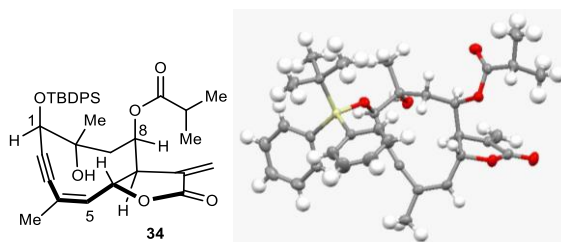

**Table 1 Crystal data and structure refinement for WL3c.**

|                                             |                                                               |
|---------------------------------------------|---------------------------------------------------------------|
| Identification code                         | WL3c                                                          |
| Empirical formula                           | C <sub>35</sub> H <sub>42</sub> O <sub>6</sub> Si             |
| Formula weight                              | 586.77                                                        |
| Temperature/K                               | 150.00(10)                                                    |
| Crystal system                              | orthorhombic                                                  |
| Space group                                 | P2 <sub>1</sub> 2 <sub>1</sub> 2 <sub>1</sub>                 |
| a/Å                                         | 9.10599(3)                                                    |
| b/Å                                         | 15.40214(5)                                                   |
| c/Å                                         | 23.08098(7)                                                   |
| α/°                                         | 90                                                            |
| β/°                                         | 90                                                            |
| γ/°                                         | 90                                                            |
| Volume/Å <sup>3</sup>                       | 3237.148(18)                                                  |
| Z                                           | 4                                                             |
| ρ <sub>calc</sub> /cm <sup>3</sup>          | 1.204                                                         |
| μ/mm <sup>-1</sup>                          | 0.985                                                         |
| F(000)                                      | 1256.0                                                        |
| Crystal size/mm <sup>3</sup>                | 0.376 × 0.195 × 0.097                                         |
| Radiation                                   | Cu Kα (λ = 1.54184)                                           |
| 2θ range for data collection/°              | 6.9 to 148.85                                                 |
| Index ranges                                | -11 ≤ h ≤ 10, -19 ≤ k ≤ 19, -28 ≤ l ≤ 28                      |
| Reflections collected                       | 144009                                                        |
| Independent reflections                     | 6598 [R <sub>int</sub> = 0.0487, R <sub>sigma</sub> = 0.0108] |
| Data/restraints/parameters                  | 6598/0/390                                                    |
| Goodness-of-fit on F <sup>2</sup>           | 1.039                                                         |
| Final R indexes [I ≥ 2σ (I)]                | R <sub>1</sub> = 0.0250, wR <sub>2</sub> = 0.0665             |
| Final R indexes [all data]                  | R <sub>1</sub> = 0.0252, wR <sub>2</sub> = 0.0666             |
| Largest diff. peak/hole / e Å <sup>-3</sup> | 0.16/-0.23                                                    |
| Flack parameter                             | 0.00(2)                                                       |

**Table 2 Fractional Atomic Coordinates (×10<sup>4</sup>) and Equivalent Isotropic Displacement Parameters (Å<sup>2</sup>×10<sup>3</sup>) for WL3c. U<sub>eq</sub> is defined as 1/3 of the trace of the orthogonalised U<sub>ij</sub> tensor.**

| Atom | x           | y          | z         | U(eq)    |
|------|-------------|------------|-----------|----------|
| Si1  | 5657.2(4)   | 4971.8(3)  | 8198.2(2) | 22.72(9) |
| O8   | 12510.2(12) | 3724.5(8)  | 6543.6(5) | 29.2(2)  |
| O10  | 13658.7(13) | 3370.7(9)  | 5723.0(5) | 36.7(3)  |
| O15  | 10518.9(11) | 5071.3(7)  | 6018.1(4) | 25.8(2)  |
| O17  | 9170.8(13)  | 5934.8(8)  | 5436.8(5) | 35.4(3)  |
| O23  | 6620.0(12)  | 3719.5(7)  | 6160.3(5) | 27.5(2)  |
| O25  | 6173.2(12)  | 4904.2(7)  | 7512.8(4) | 26.7(2)  |
| C1   | 6264.9(17)  | 4155.7(9)  | 7152.0(6) | 23.8(3)  |
| C2   | 7420.3(17)  | 3558.4(10) | 7350.6(6) | 25.8(3)  |
| C3   | 8492.8(17)  | 3132.7(10) | 7452.5(6) | 25.9(3)  |

|     |             |            |            |         |
|-----|-------------|------------|------------|---------|
| C4  | 9849.3(18)  | 2668.8(10) | 7515.5(7)  | 26.9(3) |
| C5  | 9922(2)     | 1913.1(11) | 7927.0(8)  | 33.3(4) |
| C6  | 11010.6(17) | 2927.9(11) | 7203.5(7)  | 28.4(3) |
| C7  | 11027.2(16) | 3680.3(10) | 6789.3(7)  | 25.9(3) |
| C9  | 12520.7(18) | 3445.0(10) | 5990.7(7)  | 28.6(3) |
| C11 | 10993.1(17) | 3273.4(10) | 5798.1(7)  | 26.4(3) |
| C12 | 9971.3(16)  | 3607.9(10) | 6261.9(6)  | 24.3(3) |
| C13 | 10691(2)    | 2882.4(12) | 5302.8(8)  | 36.9(4) |
| C14 | 9277.5(16)  | 4474.7(9)  | 6082.8(6)  | 23.8(3) |
| C16 | 10320.7(18) | 5767.2(10) | 5669.2(6)  | 27.1(3) |
| C18 | 11738.5(19) | 6271.1(12) | 5599.7(7)  | 32.0(3) |
| C19 | 11439(2)    | 7202.7(13) | 5413.2(9)  | 44.6(4) |
| C20 | 12701(2)    | 5789.6(14) | 5162.2(9)  | 43.5(4) |
| C21 | 8197.3(15)  | 4876.1(9)  | 6513.3(6)  | 23.6(3) |
| C22 | 6636.3(16)  | 4468.0(9)  | 6529.7(6)  | 23.4(3) |
| C24 | 5497.9(17)  | 5128.2(10) | 6333.9(7)  | 28.4(3) |
| C26 | 4535.8(17)  | 6003.9(10) | 8225.4(7)  | 29.1(3) |
| C27 | 3274.0(19)  | 5988.0(12) | 7780.5(8)  | 36.0(4) |
| C28 | 3936(2)     | 6171.1(13) | 8836.5(8)  | 40.9(4) |
| C29 | 5546(2)     | 6763.9(11) | 8060.4(10) | 42.7(4) |
| C30 | 4645.1(18)  | 3976.7(10) | 8443.0(7)  | 28.0(3) |
| C31 | 3116(2)     | 3934.2(12) | 8492.2(8)  | 34.6(4) |
| C32 | 2425(2)     | 3194.6(13) | 8696.7(8)  | 41.2(4) |
| C33 | 3231(2)     | 2471.8(13) | 8849.4(8)  | 41.4(4) |
| C34 | 4743(2)     | 2493.1(12) | 8799.7(9)  | 42.1(4) |
| C35 | 5439(2)     | 3236.5(11) | 8600.9(8)  | 36.0(4) |
| C36 | 7334.9(17)  | 5122.7(11) | 8651.7(7)  | 28.6(3) |
| C37 | 7325(2)     | 4964.3(16) | 9247.6(8)  | 43.1(4) |
| C38 | 8506(2)     | 5201.3(18) | 9593.2(9)  | 56.9(6) |
| C39 | 9723(2)     | 5600.2(16) | 9353.3(9)  | 51.3(5) |
| C40 | 9770(2)     | 5748.8(14) | 8762.0(9)  | 44.3(4) |
| C41 | 8594.2(19)  | 5509.6(12) | 8416.6(8)  | 35.1(4) |

**Table 3 Anisotropic Displacement Parameters ( $\text{\AA}^2 \times 10^3$ ) for WL3c. The Anisotropic displacement factor exponent takes the form:  $-2\pi^2[h^2a^*U_{11}+2hka^*b^*U_{12}+\dots]$ .**

| Atom | U <sub>11</sub> | U <sub>22</sub> | U <sub>33</sub> | U <sub>23</sub> | U <sub>13</sub> | U <sub>12</sub> |
|------|-----------------|-----------------|-----------------|-----------------|-----------------|-----------------|
| Si1  | 19.62(18)       | 24.01(18)       | 24.53(18)       | 1.06(15)        | 1.26(14)        | 0.39(16)        |
| O8   | 19.6(5)         | 39.2(6)         | 28.8(5)         | -0.6(5)         | -0.6(4)         | -1.4(5)         |
| O10  | 23.0(6)         | 47.7(7)         | 39.4(6)         | -3.9(5)         | 5.1(5)          | 1.1(5)          |
| O15  | 21.0(5)         | 29.3(5)         | 27.2(5)         | 4.3(4)          | 0.0(4)          | -2.4(5)         |
| O17  | 32.0(6)         | 38.4(6)         | 36.0(6)         | 7.9(5)          | -5.6(5)         | -0.2(5)         |
| O23  | 21.4(5)         | 29.4(6)         | 31.8(5)         | -8.4(4)         | -2.0(4)         | -0.4(4)         |
| O25  | 31.3(5)         | 23.1(5)         | 25.8(5)         | -0.4(4)         | 3.6(4)          | 0.6(4)          |
| C1   | 21.4(7)         | 22.6(6)         | 27.5(7)         | -0.6(6)         | 1.2(5)          | 0.1(6)          |
| C2   | 25.2(7)         | 24.4(7)         | 27.7(7)         | 0.7(5)          | 2.2(6)          | -2.0(6)         |
| C3   | 26.8(8)         | 25.4(7)         | 25.5(7)         | 1.9(6)          | 1.3(6)          | -2.2(6)         |
| C4   | 26.6(8)         | 27.4(7)         | 26.7(7)         | -0.9(6)         | -4.1(6)         | 2.3(6)          |
| C5   | 32.4(9)         | 32.6(8)         | 35.0(8)         | 7.1(7)          | -6.0(7)         | 0.6(7)          |
| C6   | 23.7(8)         | 32.2(8)         | 29.4(8)         | 0.7(6)          | -3.9(6)         | 6.6(6)          |
| C7   | 19.4(7)         | 31.9(7)         | 26.4(7)         | -1.0(6)         | 0.1(6)          | 0.7(6)          |
| C9   | 23.8(7)         | 30.3(8)         | 31.7(8)         | -0.4(6)         | -0.6(6)         | 1.5(6)          |
| C11  | 23.1(7)         | 27.1(7)         | 29.0(7)         | 0.2(6)          | 0.3(6)          | 0.8(6)          |

|     |          |          |          |          |          |          |
|-----|----------|----------|----------|----------|----------|----------|
| C12 | 20.3(7)  | 27.4(7)  | 25.1(7)  | -0.3(5)  | -0.7(6)  | 0.1(6)   |
| C13 | 31.5(8)  | 45.1(9)  | 34.1(8)  | -9.4(7)  | -0.1(7)  | 1.3(8)   |
| C14 | 20.0(6)  | 26.5(7)  | 25.0(7)  | 0.7(5)   | 0.1(6)   | -1.9(6)  |
| C16 | 28.0(8)  | 29.5(7)  | 23.7(7)  | 0.8(6)   | 2.9(6)   | -0.6(6)  |
| C18 | 31.0(8)  | 36.3(9)  | 28.9(8)  | 3.3(6)   | 3.8(6)   | -6.3(7)  |
| C19 | 52.5(12) | 37.1(9)  | 44.3(10) | 7.1(8)   | 8.2(9)   | -6.5(9)  |
| C20 | 37.5(10) | 50.3(11) | 42.7(10) | 3.6(8)   | 14.2(8)  | 0.2(8)   |
| C21 | 21.2(7)  | 24.6(7)  | 25.0(6)  | -0.5(6)  | 1.1(5)   | -2.0(6)  |
| C22 | 20.9(7)  | 23.3(7)  | 26.1(7)  | -2.5(6)  | -0.4(6)  | -0.1(6)  |
| C24 | 25.0(7)  | 31.4(8)  | 28.8(7)  | 2.3(6)   | -1.0(6)  | 4.0(6)   |
| C26 | 23.0(7)  | 25.7(7)  | 38.6(8)  | -2.5(6)  | 1.2(7)   | 2.5(6)   |
| C27 | 27.4(8)  | 35.0(9)  | 45.6(9)  | 3.6(7)   | -3.7(7)  | 6.3(7)   |
| C28 | 31.0(9)  | 45.2(10) | 46.6(10) | -15.3(8) | 3.3(8)   | 4.6(8)   |
| C29 | 33.5(9)  | 25.9(8)  | 68.7(12) | 1.8(8)   | 1.4(9)   | 0.4(7)   |
| C30 | 28.8(8)  | 29.3(7)  | 25.9(7)  | -0.1(6)  | 2.9(6)   | -3.3(6)  |
| C31 | 29.8(8)  | 36.9(9)  | 37.3(8)  | 0.8(7)   | 0.0(7)   | -4.4(7)  |
| C32 | 36.7(9)  | 45.8(10) | 41.0(9)  | -2.9(8)  | 1.4(8)   | -15.6(8) |
| C33 | 54.3(12) | 34.0(9)  | 35.9(9)  | -0.4(7)  | 1.2(8)   | -18.3(8) |
| C34 | 49.4(11) | 29.0(8)  | 47.9(10) | 4.5(8)   | -2.4(9)  | -2.4(8)  |
| C35 | 35.6(9)  | 30.0(8)  | 42.5(9)  | 3.0(7)   | 4.1(7)   | 0.1(7)   |
| C36 | 23.9(7)  | 32.6(8)  | 29.3(7)  | 3.7(6)   | -0.4(6)  | 1.0(6)   |
| C37 | 34.8(9)  | 62.2(12) | 32.3(8)  | 11.3(8)  | -2.4(7)  | -3.7(10) |
| C38 | 46.8(11) | 89.3(18) | 34.5(10) | 9.4(10)  | -13.2(9) | 0.1(12)  |
| C39 | 34.4(10) | 67.9(14) | 51.5(11) | 1.4(10)  | -19.4(9) | -1.2(9)  |
| C40 | 23.9(8)  | 55.0(12) | 53.9(11) | 5.7(9)   | -4.6(8)  | -5.3(8)  |
| C41 | 25.6(8)  | 46.1(10) | 33.6(8)  | 4.1(7)   | -0.7(7)  | -2.4(7)  |

**Table 4 Bond Lengths for WL3c.**

| Atom | Atom | Length/Å   | Atom | Atom | Length/Å   |
|------|------|------------|------|------|------------|
| Si1  | O25  | 1.6537(11) | C12  | C14  | 1.534(2)   |
| Si1  | C26  | 1.8904(16) | C14  | C21  | 1.5289(19) |
| Si1  | C30  | 1.8755(16) | C16  | C18  | 1.515(2)   |
| Si1  | C36  | 1.8663(16) | C18  | C19  | 1.523(3)   |
| O8   | C7   | 1.4662(18) | C18  | C20  | 1.529(3)   |
| O8   | C9   | 1.3469(19) | C21  | C22  | 1.5547(19) |
| O10  | C9   | 1.212(2)   | C22  | C24  | 1.521(2)   |
| O15  | C14  | 1.4643(17) | C26  | C27  | 1.541(2)   |
| O15  | C16  | 1.3528(19) | C26  | C28  | 1.534(2)   |
| O17  | C16  | 1.204(2)   | C26  | C29  | 1.537(2)   |
| O23  | C22  | 1.4341(18) | C30  | C31  | 1.399(2)   |
| O25  | C1   | 1.4246(17) | C30  | C35  | 1.398(2)   |
| C1   | C2   | 1.471(2)   | C31  | C32  | 1.384(3)   |
| C1   | C22  | 1.552(2)   | C32  | C33  | 1.380(3)   |
| C2   | C3   | 1.200(2)   | C33  | C34  | 1.381(3)   |
| C3   | C4   | 1.434(2)   | C34  | C35  | 1.387(3)   |
| C4   | C5   | 1.504(2)   | C36  | C37  | 1.397(2)   |
| C4   | C6   | 1.340(2)   | C36  | C41  | 1.402(2)   |
| C6   | C7   | 1.502(2)   | C37  | C38  | 1.388(3)   |
| C7   | C12  | 1.555(2)   | C38  | C39  | 1.383(3)   |
| C9   | C11  | 1.484(2)   | C39  | C40  | 1.384(3)   |
| C11  | C12  | 1.509(2)   | C40  | C41  | 1.385(3)   |
| C11  | C13  | 1.321(2)   |      |      |            |

**Table 5 Bond Angles for WL3c.**

| Atom | Atom | Atom | Angle/°    | Atom | Atom | Atom | Angle/°    |
|------|------|------|------------|------|------|------|------------|
| O25  | Si1  | C26  | 103.78(7)  | O17  | C16  | O15  | 123.42(14) |
| O25  | Si1  | C30  | 112.11(6)  | O17  | C16  | C18  | 125.73(15) |
| O25  | Si1  | C36  | 108.16(7)  | C16  | C18  | C19  | 111.10(15) |
| C30  | Si1  | C26  | 114.32(7)  | C16  | C18  | C20  | 108.06(15) |
| C36  | Si1  | C26  | 108.60(7)  | C19  | C18  | C20  | 111.90(15) |
| C36  | Si1  | C30  | 109.58(7)  | C14  | C21  | C22  | 116.14(12) |
| C9   | O8   | C7   | 110.99(12) | O23  | C22  | C1   | 107.39(12) |
| C16  | O15  | C14  | 117.06(11) | O23  | C22  | C21  | 108.67(11) |
| C1   | O25  | Si1  | 128.82(9)  | O23  | C22  | C24  | 110.72(12) |
| O25  | C1   | C2   | 111.46(12) | C1   | C22  | C21  | 110.31(12) |
| O25  | C1   | C22  | 107.64(11) | C24  | C22  | C1   | 109.49(12) |
| C2   | C1   | C22  | 109.05(12) | C24  | C22  | C21  | 110.22(12) |
| C3   | C2   | C1   | 170.17(16) | C27  | C26  | Si1  | 111.54(11) |
| C2   | C3   | C4   | 173.33(16) | C28  | C26  | Si1  | 111.34(12) |
| C3   | C4   | C5   | 119.18(14) | C28  | C26  | C27  | 110.49(14) |
| C6   | C4   | C3   | 118.47(14) | C28  | C26  | C29  | 108.24(15) |
| C6   | C4   | C5   | 122.35(14) | C29  | C26  | Si1  | 108.00(11) |
| C4   | C6   | C7   | 125.42(14) | C29  | C26  | C27  | 107.05(15) |
| O8   | C7   | C6   | 106.93(12) | C31  | C30  | Si1  | 123.50(13) |
| O8   | C7   | C12  | 105.67(11) | C35  | C30  | Si1  | 119.38(13) |
| C6   | C7   | C12  | 115.88(13) | C35  | C30  | C31  | 117.10(16) |
| O8   | C9   | C11  | 109.52(13) | C32  | C31  | C30  | 121.26(18) |
| O10  | C9   | O8   | 121.29(15) | C33  | C32  | C31  | 120.60(18) |
| O10  | C9   | C11  | 129.19(15) | C32  | C33  | C34  | 119.35(18) |
| C9   | C11  | C12  | 107.73(13) | C33  | C34  | C35  | 120.18(19) |
| C13  | C11  | C9   | 122.40(15) | C34  | C35  | C30  | 121.51(17) |
| C13  | C11  | C12  | 129.86(15) | C37  | C36  | Si1  | 121.68(13) |
| C11  | C12  | C7   | 101.45(12) | C37  | C36  | C41  | 117.42(15) |
| C11  | C12  | C14  | 111.10(12) | C41  | C36  | Si1  | 120.37(12) |
| C14  | C12  | C7   | 113.78(12) | C38  | C37  | C36  | 121.02(18) |
| O15  | C14  | C12  | 104.81(11) | C39  | C38  | C37  | 120.51(18) |
| O15  | C14  | C21  | 108.01(11) | C38  | C39  | C40  | 119.51(18) |
| C21  | C14  | C12  | 116.22(12) | C39  | C40  | C41  | 120.00(18) |
| O15  | C16  | C18  | 110.81(13) | C40  | C41  | C36  | 121.52(16) |

**Table 6 Torsion Angles for WL3c.**

| A   | B   | C   | D   | Angle/°     | A   | B   | C   | D   | Angle/°     |
|-----|-----|-----|-----|-------------|-----|-----|-----|-----|-------------|
| Si1 | O25 | C1  | C2  | -66.87(16)  | C9  | C11 | C12 | C14 | 103.15(14)  |
| Si1 | O25 | C1  | C22 | 173.60(10)  | C11 | C12 | C14 | O15 | -61.81(14)  |
| Si1 | C30 | C31 | C32 | -177.44(13) | C11 | C12 | C14 | C21 | 179.07(12)  |
| Si1 | C30 | C35 | C34 | 178.22(14)  | C12 | C14 | C21 | C22 | -77.34(16)  |
| Si1 | C36 | C37 | C38 | -170.22(18) | C13 | C11 | C12 | C7  | 161.06(18)  |
| Si1 | C36 | C41 | C40 | 170.09(15)  | C13 | C11 | C12 | C14 | -77.7(2)    |
| O8  | C7  | C12 | C11 | 21.17(15)   | C14 | O15 | C16 | O17 | 3.6(2)      |
| O8  | C7  | C12 | C14 | -98.21(14)  | C14 | O15 | C16 | C18 | -174.44(12) |
| O8  | C9  | C11 | C12 | 8.68(17)    | C14 | C21 | C22 | O23 | 5.93(17)    |
| O8  | C9  | C11 | C13 | -170.58(16) | C14 | C21 | C22 | C1  | 123.40(13)  |
| O10 | C9  | C11 | C12 | -170.77(17) | C14 | C21 | C22 | C24 | -115.56(14) |
| O10 | C9  | C11 | C13 | 10.0(3)     | C16 | O15 | C14 | C12 | 156.38(12)  |

|                 |             |                 |             |
|-----------------|-------------|-----------------|-------------|
| O15 C14 C21 C22 | 165.29(11)  | C16 O15 C14 C21 | -79.12(14)  |
| O15 C16 C18 C19 | -158.42(14) | C26 Si1 O25 C1  | -140.30(12) |
| O15 C16 C18 C20 | 78.46(16)   | C26 Si1 C30 C31 | 16.56(17)   |
| O17 C16 C18 C19 | 23.6(2)     | C26 Si1 C30 C35 | -161.77(13) |
| O17 C16 C18 C20 | -99.5(2)    | C26 Si1 C36 C37 | 85.96(17)   |
| O25 Si1 C26 C27 | 55.31(13)   | C26 Si1 C36 C41 | -85.51(15)  |
| O25 Si1 C26 C28 | 179.24(11)  | C30 Si1 O25 C1  | -16.43(14)  |
| O25 Si1 C26 C29 | -62.06(14)  | C30 Si1 C26 C27 | -67.10(14)  |
| O25 Si1 C30 C31 | -101.19(15) | C30 Si1 C26 C28 | 56.82(14)   |
| O25 Si1 C30 C35 | 80.47(14)   | C30 Si1 C26 C29 | 175.53(12)  |
| O25 Si1 C36 C37 | -162.02(16) | C30 Si1 C36 C37 | -39.54(18)  |
| O25 Si1 C36 C41 | 26.51(16)   | C30 Si1 C36 C41 | 148.99(14)  |
| O25 C1 C22 O23  | -175.81(11) | C30 C31 C32 C33 | -1.0(3)     |
| O25 C1 C22 C21  | 65.93(15)   | C31 C30 C35 C34 | -0.2(3)     |
| O25 C1 C22 C24  | -55.54(15)  | C31 C32 C33 C34 | 0.4(3)      |
| C2 C1 C22 O23   | 63.13(15)   | C32 C33 C34 C35 | 0.3(3)      |
| C2 C1 C22 C21   | -55.13(15)  | C33 C34 C35 C30 | -0.4(3)     |
| C2 C1 C22 C24   | -176.59(12) | C35 C30 C31 C32 | 0.9(3)      |
| C3 C4 C6 C7     | 0.6(2)      | C36 Si1 O25 C1  | 104.49(13)  |
| C4 C6 C7 O8     | -179.71(15) | C36 Si1 C26 C27 | 170.22(11)  |
| C4 C6 C7 C12    | -62.2(2)    | C36 Si1 C26 C28 | -65.86(13)  |
| C5 C4 C6 C7     | -179.33(15) | C36 Si1 C26 C29 | 52.85(14)   |
| C6 C7 C12 C11   | -97.01(15)  | C36 Si1 C30 C31 | 138.71(14)  |
| C6 C7 C12 C14   | 143.61(13)  | C36 Si1 C30 C35 | -39.63(15)  |
| C7 O8 C9 O10    | -174.59(15) | C36 C37 C38 C39 | -0.1(4)     |
| C7 O8 C9 C11    | 5.90(17)    | C37 C36 C41 C40 | -1.7(3)     |
| C7 C12 C14 O15  | 51.93(15)   | C37 C38 C39 C40 | -1.1(4)     |
| C7 C12 C14 C21  | -67.20(17)  | C38 C39 C40 C41 | 0.9(4)      |
| C9 O8 C7 C6     | 106.40(14)  | C39 C40 C41 C36 | 0.6(3)      |
| C9 O8 C7 C12    | -17.61(16)  | C41 C36 C37 C38 | 1.5(3)      |
| C9 C11 C12 C7   | -18.13(16)  |                 |             |

**Table 7 Hydrogen Atom Coordinates ( $\text{\AA} \times 10^4$ ) and Isotropic Displacement Parameters ( $\text{\AA}^2 \times 10^3$ ) for WL3c.**

| Atom | x        | y        | z       | U(eq) |
|------|----------|----------|---------|-------|
| H23  | 5680(30) | 3606(14) | 6043(9) | 41    |
| H1   | 5298     | 3847.9   | 7150.01 | 29    |
| H5A  | 9299.83  | 1441.39  | 7782.5  | 50    |
| H5B  | 9575.3   | 2095.79  | 8309.98 | 50    |
| H5C  | 10939.24 | 1709.76  | 7956.67 | 50    |
| H6   | 11896.82 | 2609.36  | 7247.9  | 34    |
| H7   | 10815.03 | 4228.66  | 7005.58 | 31    |
| H12  | 9186.88  | 3170.16  | 6343.12 | 29    |
| H13A | 11465.25 | 2699.95  | 5055.49 | 44    |
| H13B | 9698.38  | 2783.69  | 5194.05 | 44    |
| H14  | 8780.38  | 4402.9   | 5699.41 | 29    |
| H18  | 12258.13 | 6281.7   | 5981.34 | 38    |
| H19A | 10874.71 | 7201.83  | 5051.7  | 67    |
| H19B | 12373    | 7505.3   | 5352.24 | 67    |
| H19C | 10876.52 | 7500.55  | 5715.79 | 67    |
| H20A | 12890.31 | 5199.28  | 5301.95 | 65    |
| H20B | 13634.95 | 6098.4   | 5116.34 | 65    |



|      |          |         |         |    |
|------|----------|---------|---------|----|
| H20C | 12195.24 | 5762.54 | 4787.88 | 65 |
| H21A | 8096.1   | 5501.01 | 6421.07 | 28 |
| H21B | 8628.31  | 4833.3  | 6906.08 | 28 |
| H24A | 5693.89  | 5295.58 | 5931.68 | 43 |
| H24B | 5550.63  | 5642.85 | 6582.71 | 43 |
| H24C | 4515.59  | 4871.49 | 6361.27 | 43 |
| H27A | 3673.56  | 5874.49 | 7393.55 | 54 |
| H27B | 2770.37  | 6550.26 | 7781.39 | 54 |
| H27C | 2575.91  | 5529.01 | 7883.51 | 54 |
| H28A | 3298.07  | 5688.67 | 8951.78 | 61 |
| H28B | 3371.53  | 6712.76 | 8838.26 | 61 |
| H28C | 4755.72  | 6218.57 | 9109.86 | 61 |
| H29A | 6342.53  | 6810.48 | 8344.14 | 64 |
| H29B | 4978.09  | 7304.42 | 8057.21 | 64 |
| H29C | 5960.8   | 6661.41 | 7674.69 | 64 |
| H31  | 2540.57  | 4422.09 | 8383.24 | 42 |
| H32  | 1385.5   | 3184.73 | 8732.21 | 49 |
| H33  | 2752.32  | 1964.46 | 8987.43 | 50 |
| H34  | 5306.36  | 1997.27 | 8901.92 | 51 |
| H35  | 6479.82  | 3242.93 | 8571.32 | 43 |
| H37  | 6497.54  | 4690.22 | 9418.85 | 52 |
| H38  | 8477.6   | 5088.74 | 9997.74 | 68 |
| H39  | 10521.69 | 5770.9  | 9592.45 | 62 |
| H40  | 10608.05 | 6014.85 | 8593.29 | 53 |
| H41  | 8642.39  | 5610.09 | 8010.97 | 42 |

## Experimental

Single crystals of  $C_{35}H_{42}O_6Si$  [WL3c] were [34]. A suitable crystal was selected and [34] on a XtaLAB Synergy, Dualflex, HyPix-Arc diffractometer. The crystal was kept at 150.00(10) K during data collection. Using Olex2 [1], the structure was solved with the olex2.solve [2] structure solution program using Charge Flipping and refined with the SHELXL [3] refinement package using Least Squares minimisation.

1. Dolomanov, O.V., Bourhis, L.J., Gildea, R.J., Howard, J.A.K. & Puschmann, H. (2009), J. Appl. Cryst. 42, 339-341.
2. Bourhis, L.J., Dolomanov, O.V., Gildea, R.J., Howard, J.A.K., Puschmann, H. (2015). Acta Cryst. A71, 59-75.
3. Sheldrick, G.M. (2015). Acta Cryst. C71, 3-8.

## Crystal structure determination of [WL3c]

**Crystal Data** for  $C_{35}H_{42}O_6Si$  ( $M = 586.77$  g/mol): orthorhombic, space group  $P2_12_12_1$  (no. 19),  $a = 9.10599(3)$  Å,  $b = 15.40214(5)$  Å,  $c = 23.08098(7)$  Å,  $V = 3237.148(18)$  Å<sup>3</sup>,  $Z = 4$ ,  $T = 150.00(10)$  K,  $\mu(Cu K\alpha) = 0.985$  mm<sup>-1</sup>,  $D_{calc} = 1.204$  g/cm<sup>3</sup>, 144009 reflections measured ( $6.9^\circ \leq 2\theta \leq 148.85^\circ$ ), 6598 unique ( $R_{int} = 0.0487$ ,  $R_{sigma} = 0.0108$ ) which were used in all calculations. The final  $R_1$  was 0.0250 ( $I > 2\sigma(I)$ ) and  $wR_2$  was 0.0666 (all data).

## Refinement model description

Number of restraints - 0, number of constraints - unknown.

Details:

1. Twinned data refinement

Scales: 1.00(2)

0.00(2)

2. Fixed Uiso

At 1.2 times of:

All C(H) groups, All C(H,H) groups

At 1.5 times of:

All C(H,H,H) groups, All O(H) groups

3.a Ternary CH refined with riding coordinates:

C1(H1), C7(H7), C12(H12), C14(H14), C18(H18)

3.b Secondary CH2 refined with riding coordinates:

C21(H21A,H21B)

3.c Aromatic/amide H refined with riding coordinates:

C6(H6), C31(H31), C32(H32), C33(H33), C34(H34), C35(H35), C37(H37), C38(H38),  
C39(H39), C40(H40), C41(H41)

3.d X=CH2 refined with riding coordinates:

C13(H13A,H13B)

3.e Idealised Me refined as rotating group:

C5(H5A,H5B,H5C), C19(H19A,H19B,H19C), C20(H20A,H20B,H20C), C24(H24A,H24B,  
H24C), C27(H27A,H27B,H27C), C28(H28A,H28B,H28C), C29(H29A,H29B,H29C)

This report has been created with Olex2, compiled on Nov 21 2019 18:26:39 for OlexSys.

## n) Abbreviation

|                         |                                                                                                                   |
|-------------------------|-------------------------------------------------------------------------------------------------------------------|
| Ac                      | acetyl                                                                                                            |
| ACLY                    | ATP-citrate synthase                                                                                              |
| AD-mix- $\alpha$        | a mixture of (DHQ) <sub>2</sub> PHAL, potassium osmate dihydrate, potassium carbonate, and potassium ferricyanide |
| AKT                     | protein kinase B                                                                                                  |
| Boc                     | <i>tert</i> -butyloxycarbonyl                                                                                     |
| <i>t</i> Bu             | <i>tert</i> -butyl                                                                                                |
| CID                     | collision-induced dissociation                                                                                    |
| <i>m</i> CPBA           | <i>meta</i> -chloroperoxybenzoic acid                                                                             |
| CSA                     | camphorsulfonic acid                                                                                              |
| CuAAC                   | Cu <sup>I</sup> -catalyzed azide/alkyne cycloaddition                                                             |
| Cy3                     | Cyanine 3                                                                                                         |
| dba                     | dibenzylideneacetone                                                                                              |
| DBU                     | 1,8-diazabicyclo[5.4.0]undec-7-ene                                                                                |
| DCE                     | 1,2-dichloroethane                                                                                                |
| DCM                     | CH <sub>2</sub> Cl <sub>2</sub> , dichloromethane                                                                 |
| DDQ                     | 2,3-dichloro-5,6-dicyano-1,4-benzoquinone                                                                         |
| (DHQD) <sub>2</sub> Pyr | hydroquinidine-2,5-diphenyl-4,6-pyrimidinediyl diether                                                            |
| DIPEA                   | <i>N,N</i> -diisopropylethylamine                                                                                 |
| DMAP                    | 4-dimethylaminopyridine                                                                                           |
| DMEM                    | Dulbecco's modified eagle medium                                                                                  |
| DMF                     | dimethylformamide                                                                                                 |
| DMSO                    | dimethyl sulfoxide                                                                                                |
| <i>dr</i>               | diastereomeric ratio                                                                                              |
| DTT                     | dithiothreitol                                                                                                    |
| DMP                     | Dess–Martin periodinane                                                                                           |
| EDTA                    | ethylenediaminetetraacetic acid                                                                                   |
| <i>ee</i>               | enantiomeric excess                                                                                               |
| Et                      | ethyl                                                                                                             |
| FCS                     | fetal calf serum                                                                                                  |
| HATU                    | 1-[bis(dimethylamino)methylene]-1 <i>H</i> -1,2,3-triazolo[4,5- <i>b</i> ]pyridinium 3-oxide hexafluorophosphate  |
| HCD                     | higher-energy C-trap dissociation                                                                                 |
| HF                      | hydrofluoric acid                                                                                                 |
| HPLC                    | high-performance liquid chromatography                                                                            |
| HRMS                    | high resolution mass spectrometry                                                                                 |
| Imid.                   | imidazole                                                                                                         |
| IPO5                    | importin-5                                                                                                        |
| IR                      | infrared spectra                                                                                                  |

|                  |                                                            |
|------------------|------------------------------------------------------------|
| KPNB1            | karyopherin subunit beta 1                                 |
| LC-MS            | liquid chromatography–mass spectrometry                    |
| Me               | methyl                                                     |
| m.p.             | melting point                                              |
| NLS              | nuclear localization sequence                              |
| NOE              | nuclear overhauser effect                                  |
| PBS              | phosphate-buffered saline                                  |
| PFA              | paraformaldehyde                                           |
| PhMe             | toluene                                                    |
| PMB              | <i>p</i> -methoxybenzyl                                    |
| PPh <sub>3</sub> | triphenylphosphine                                         |
| PTLC             | preparative thin-layer chromatography                      |
| PTSA             | <i>p</i> -TsOH, <i>p</i> -toluenesulfonic acid             |
| Py               | pyridine                                                   |
| RASAL2           | RAS protein activator like 2                               |
| Red-Al           | vitride, sodium bis(2-methoxyethoxy)aluminium hydride      |
| r.t.             | room temperature                                           |
| SAD              | Sharpless asymmetric dihydroxylation                       |
| <i>Sat. aq.</i>  | saturated aqueous solution                                 |
| SDS              | sodium dodecyl sulphate                                    |
| SDS-PAGE         | sodium dodecyl sulphate–polyacrylamide gel electrophoresis |
| SEM              | standard error of mean                                     |
| STDEV            | standard deviation                                         |
| TBAF             | tetra- <i>n</i> -butylammonium fluoride                    |
| TBDPSCI          | tert-Butyl(chloro)diphenylsilane                           |
| TBTA             | tris[(1-benzyl-1 <i>H</i> -1,2,3-triazol-4-yl)methyl]amine |
| TCEP             | tris(2-carboxyethyl)phosphine hydrochloride                |
| Tf               | triflate                                                   |
| TFA              | trifluoroacetic acid                                       |
| THF              | tetrahydrofuran                                            |
| TLC              | thin-layer chromatography                                  |
| TMS              | trimethylsilyl                                             |
| TMSOTf           | trimethylsilyl trifluoromethanesulfonate                   |
| UBA1             | ubiquitin-like modifier-activating enzyme 1                |
